# Supplementary material for: Alterations in cytoskeletal and Ca2+ cycling regulators in atria lacking the obscurin Ig58/59 module
Source: Frontiers journal article supplement (doi:10.3389/fcvm.2023.1085840), 2023-04-13
Supplement: Image_1.pdf [file Image_1.pdf]

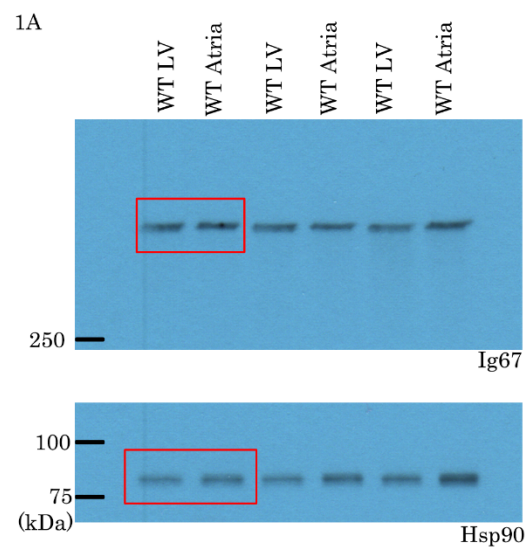

**Original blots in Fig. 1A**

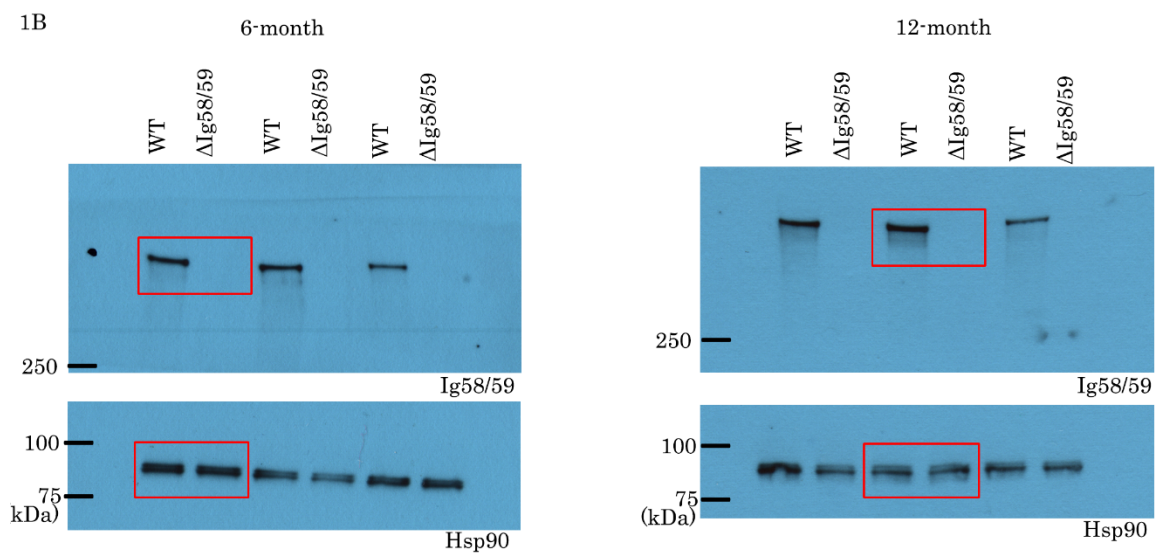

**Original blots in Fig. 1B**

1C

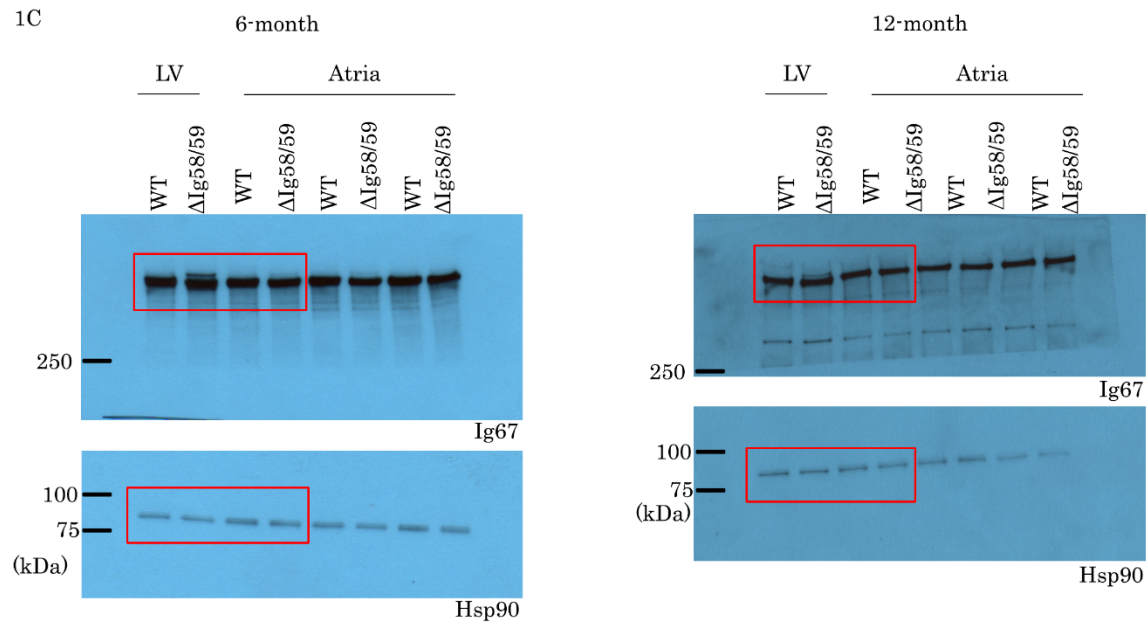

**Original blots in Fig. 1C**

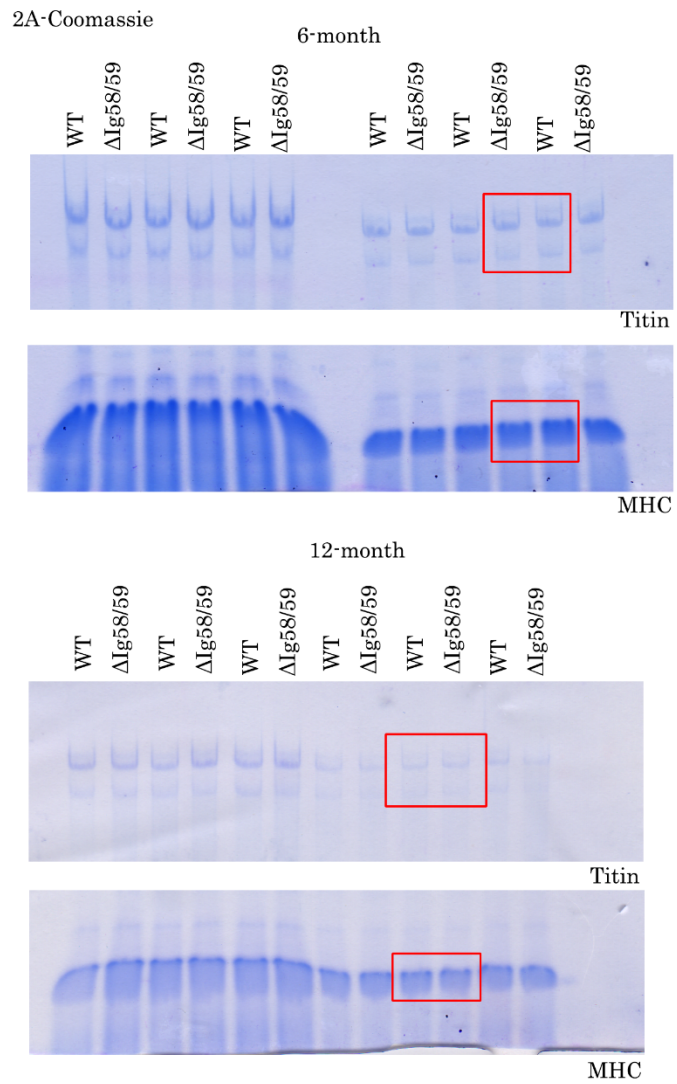

**Original Coomassie Gels in Fig. 2A**

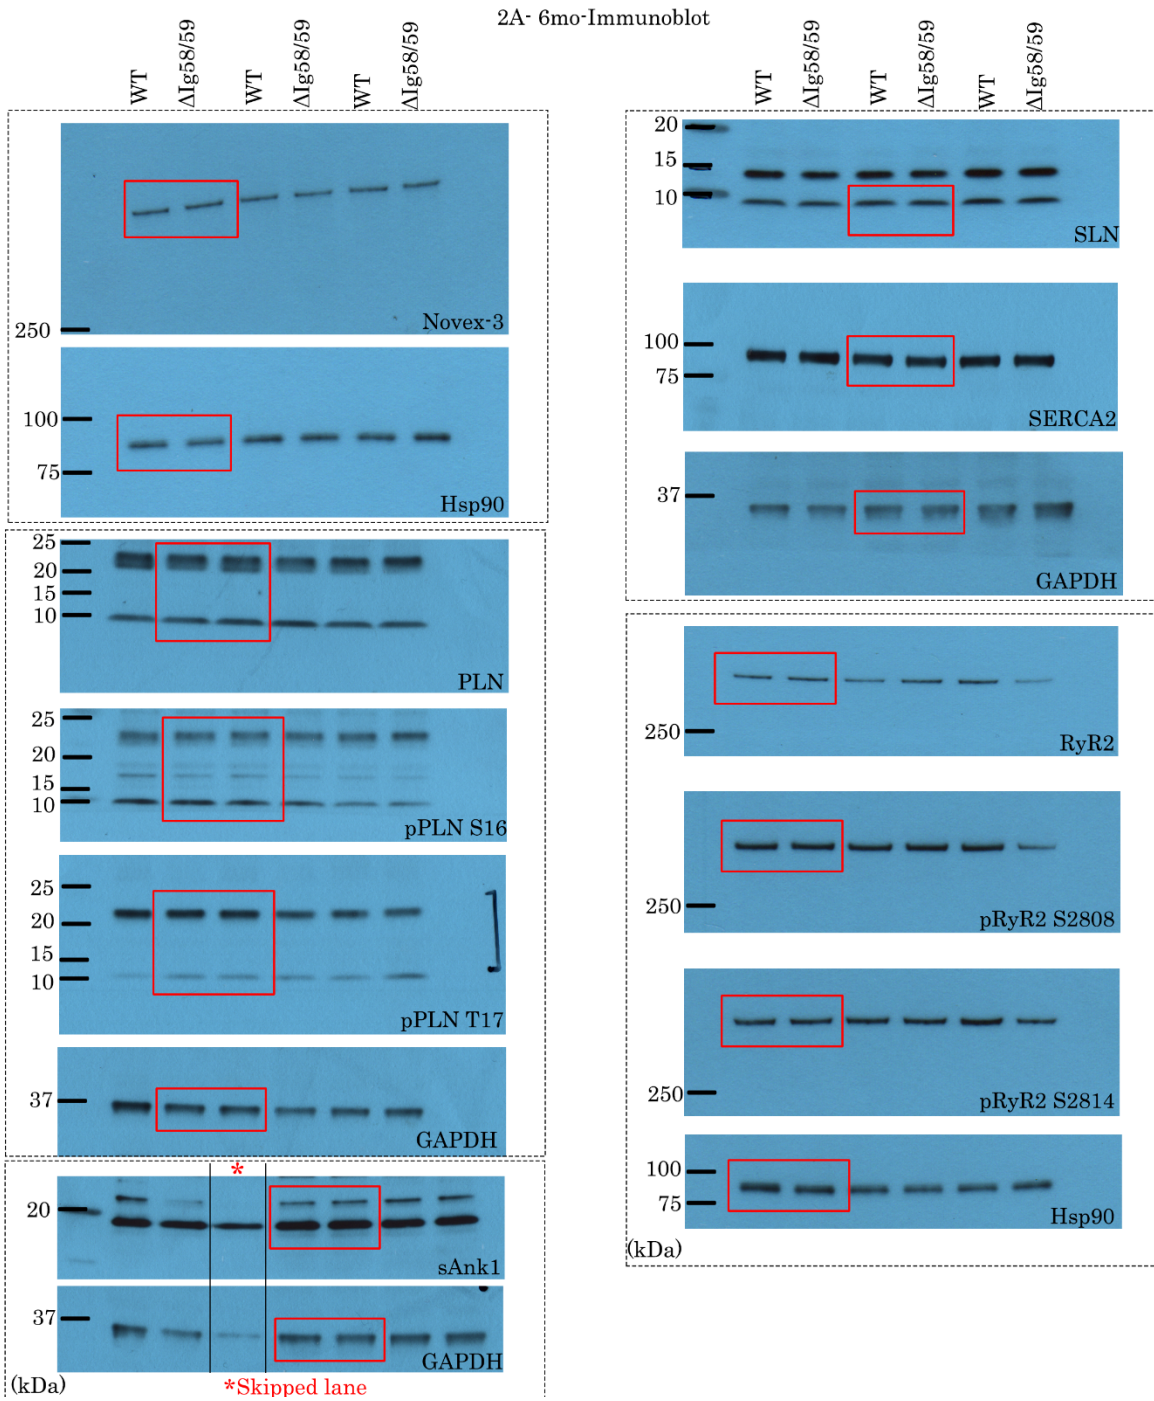

Original blots in Fig. 2A (6-month)

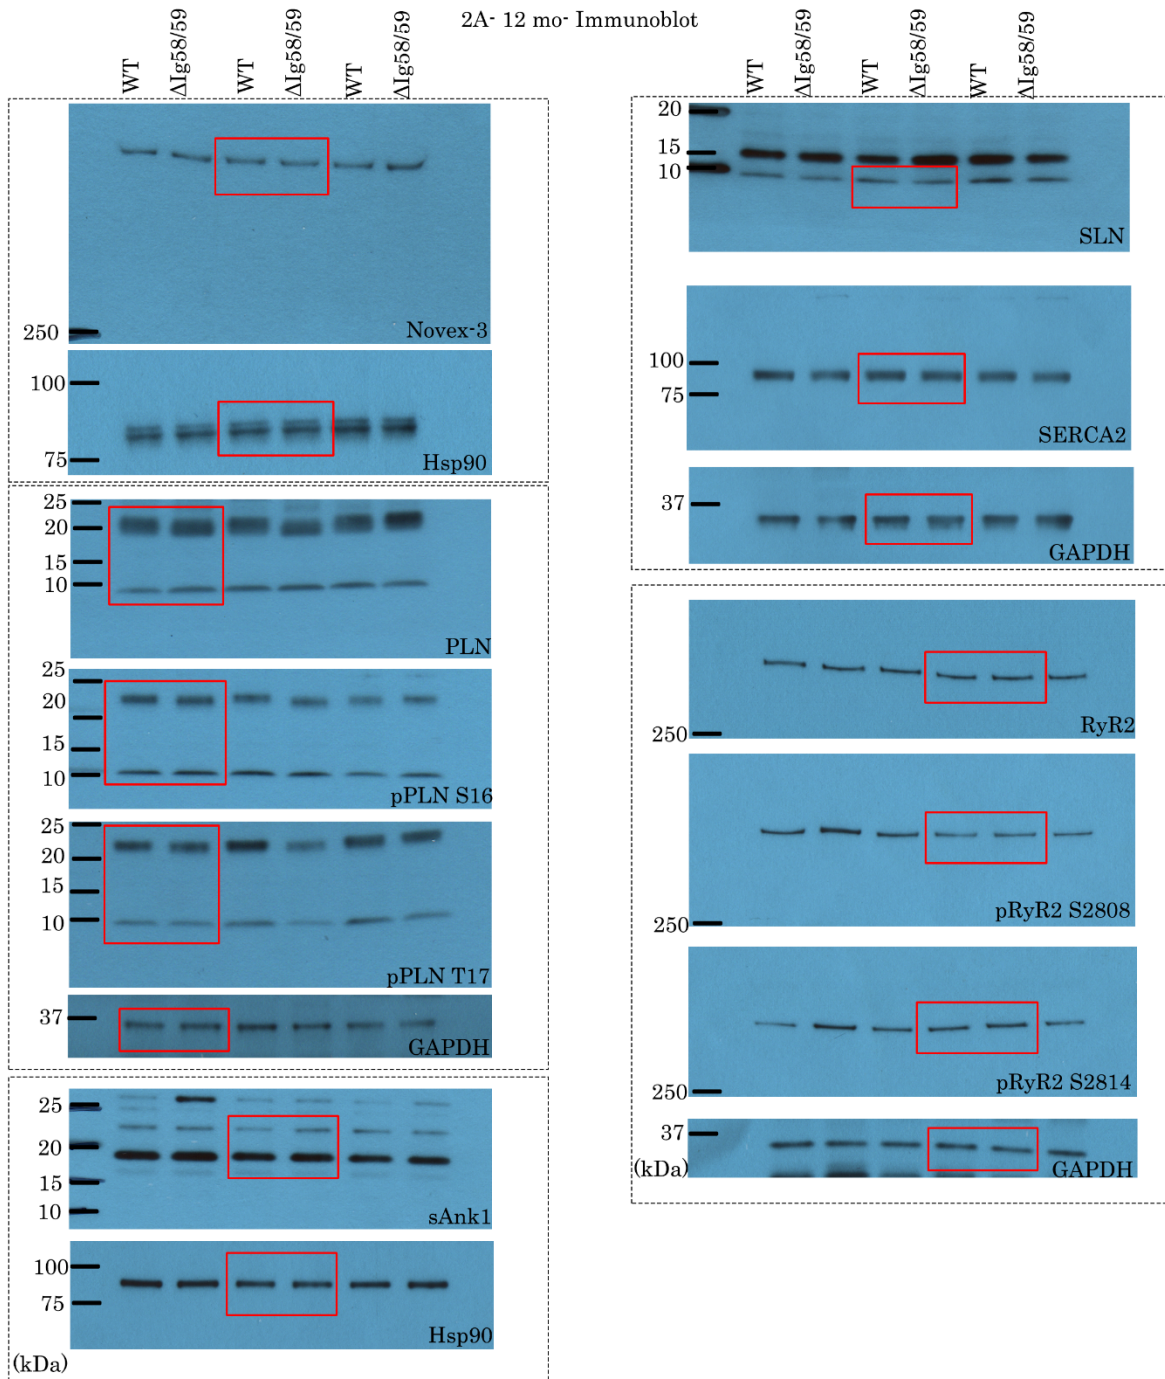

Original blots in Fig. 2A (12 month)

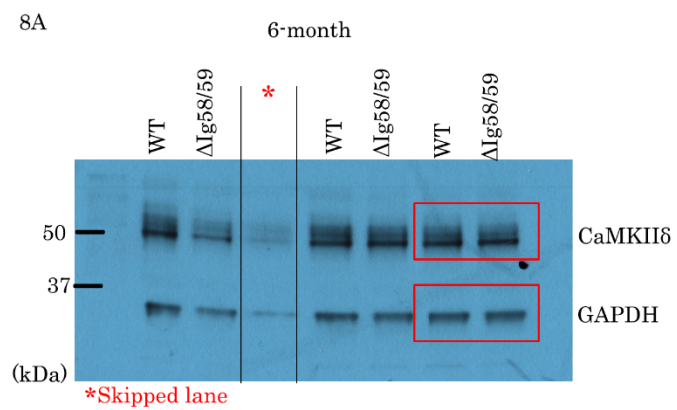

**Original blots in Fig. 8A**

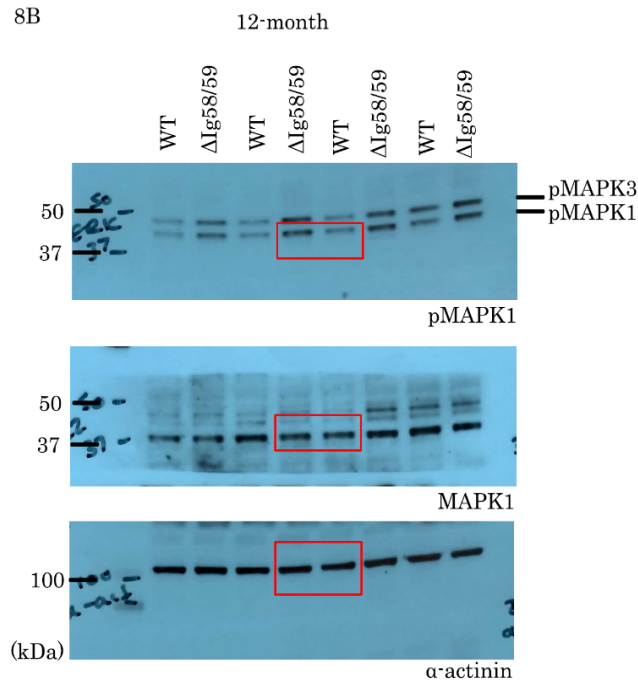

**Original blots in Fig. 8B:** The phospho-p44/p42 antibody (#4370; Cell Signaling) recognizes both phospho-MAPK1 (p42; also known as ERK2) and phospho-MAPK3 (p44; also known as ERK1). Phospho-MAPK3 appears to follow the same trend as phospho-MAPK1 in  $\Delta$ Ig58/59 atria, however since our proteomics study did not identify it as a differentially regulated kinase, we did not probe for total levels of MAPK3. Please note that Figure 8 only shows the phosphorylation levels of MAPK1 (that was identified in our proteomics screen), as illustrated by the red boxed area.
