# Supplementary material for: Alterations in cytoskeletal and Ca2+ cycling regulators in atria lacking the obscurin Ig58/59 module
Source: Front Cardiovasc Med. 2023 Apr 13;10:1085840. doi: 10.3389/fcvm.2023.1085840 (PMC10251194; doi:10.3389/fcvm.2023.1085840)
Supplement: Supplementary file 10 [file Data_Sheet_2.xlsx]

## Sheet: 6-Mo_Raw_All-PhosphoPeptides-Un
Column #	Sort	Column ID	Accession	Gene Symbol	Obs 6Mo (KO)	Obs 6Mo (WT)	Mean 6Mo (KO)	Mean 6Mo (WT)	Avg 6Mo (KO + WT)	6Mo-KO_1Way vs. WT (p-val)	6Mo-KO_1Way vs. WT (ratio)	6Mo-KO_1Way vs. WT Lin(FC)	6Mo-KO_1Way vs. WT (Description)	6Mo-KO_1Way vs. WT 95% lower limit	6Mo-KO_1Way vs. WT 95% upper limit	6Mo-KO_1Way vs. WT Log2(FC)	Accession	Sequence	Mod Pob	Mod AllPoss	Protein RefSeq accession	Local FDR	Global FDR	Gene Symbol	Gene Name (NCBI)	Entrez GeneID	Symbol from nomenclature authority	CytoLoc (NCBI)	type_of_gene (NCBI)	SD Binned 6Mo-KO_1Way vs. WT Log2(FC)	Abundances (Normalized): F6: Sample, KO	Abundances (Normalized): F7: Sample, KO	Abundances (Normalized): F8: Sample, KO	Abundances (Normalized): F9: Sample, KO	Abundances (Normalized): F10: Sample, KO	Abundances (Normalized): F1: Sample, WT	Abundances (Normalized): F2: Sample, WT	Abundances (Normalized): F3: Sample, WT	Abundances (Normalized): F4: Sample, WT	Abundances (Normalized): F5: Sample, WT
576	1	F6TFN2_SYTSDLQK_1xPhospho [S1(84.4)]_1xPhospho [S1(84.4); Y2(0.1); T3(13.1); S4(2.4)]	F6TFN2	---	5	5	22.2572	16.068	19.1626	1.55785e-06	72.9704	72.9704	6Mo-KO_1Way up vs WT	33.096	160.886	6.18924	F6TFN2	SYTSDLQK	1xPhospho [S1(84.4)]	1xPhospho [S1(84.4); Y2(0.1); T3(13.1); S4(2.4)]	---	0.0580222	0.00274627	Lmo7	LIM domain only 7	380928	Lmo7	14 E2.3|14 50.9 cM	protein-coding	> +6s	21.9033	22.2598	22.5099	22.2441	22.3689	16.5906	15.3352	15.3352	15.3352	17.7436
690	2	Q9QVP4_GSSNVFSMFEQAQIQEFK_1xDeamidated [Q/N]; 1xPhospho [S2(89.2)]_1xDeamidated [N4; Q11; Q13; Q15]; 1xPhospho [S2(89.2); S3(10.8); S7(0)]	Q9QVP4	Myl7	5	5	16.3518	22.2519	19.3019	3.67638e-05	0.0167451	-59.7191	6Mo-KO_1Way down vs WT	-188.804	-18.8893	-5.90012	Q9QVP4	GSSNVFSMFEQAQIQEFK	1xDeamidated [Q/N]; 1xPhospho [S2(89.2)]	1xDeamidated [N4; Q11; Q13; Q15]; 1xPhospho [S2(89.2); S3(10.8); S7(0)]	NP_075017	0.000295611	0.000420153	Myl7	myosin, light polypeptide 7, regulatory	17898	Myl7	11 A1|11 3.88 cM	protein-coding	= -6s	17.4168	14.7724	16.8159	15.3372	17.4168	21.9657	22.9296	21.6045	21.0817	23.6782
1025	3	E9PUK6_RVSRTPEPK_2xPhospho [S3(100); T5(100)]_2xPhospho [S3(100); T5(100)]	E9PUK6	Srrm1	5	5	22.6339	25.2563	23.9451	0.000586842	0.162402	-6.15757	6Mo-KO_1Way down vs WT	-13.2294	-2.866	-2.62236	E9PUK6	RVSRTPEPK	2xPhospho [S3(100); T5(100)]	2xPhospho [S3(100); T5(100)]	NP_058079	0.0720088	0.00329599	Srrm1	serine/arginine repetitive matrix 1	51796	Srrm1	4|4 D3	protein-coding	-6s	22.6836	22.3573	22.3894	22.1236	23.6158	25.0962	24.5074	25.1409	24.7461	26.7909
1084	4	Q9ERE3_HQSDPSEDEDERSTSKPHSTSR_2xPhospho [S3(100); S6(100)]_2xPhospho [S3(100); S6(100); S13(0); T14(0); S15(0); S19(0); T20(0); S21(0)]	Q9ERE3	Sgk3	5	5	18.8139	20.5736	19.6938	0.000948267	0.295322	-3.38614	6Mo-KO_1Way down vs WT	-5.88792	-1.94736	-1.75964	Q9ERE3	HQSDPSEDEDERSTSKPHSTSR	2xPhospho [S3(100); S6(100)]	2xPhospho [S3(100); S6(100); S13(0); T14(0); S15(0); S19(0); T20(0); S21(0)]	NP_001032848	0.0406775	0.00237867	Sgk3	serum/glucocorticoid regulated kinase 3	170755	Sgk3	1 A2|1 2.08 cM	protein-coding	-3s	19.1928	18.3235	18.8869	19.2642	18.4023	20.6334	21.3637	20.8146	20.4483	19.6079
778	5	A0A087WRY3_KDDSHSAEDSEDEKDDHK_2xPhospho [S6(99.7); S10(100)]_2xPhospho [S4(0.3); S6(99.7); S10(100)]	A0A087WRY3	Nucks1	5	5	14.6574	21.4504	18.0539	0.00147439	0.0090176	-110.894	6Mo-KO_1Way down vs WT	-1098.79	-11.1919	-6.79304	A0A087WRY3	KDDSHSAEDSEDEKDDHK	2xPhospho [S6(99.7); S10(100)]	2xPhospho [S4(0.3); S6(99.7); S10(100)]	NP_001139276	0.000537495	0.000420153	Nucks1	nuclear casein kinase and cyclin-dependent kinase substrate 1	98415	Nucks1	1|1 E4	protein-coding	= -6s	15.6888	14.0266	14.7724	14.0266	14.7724	20.9226	24.0283	22.4954	16.2641	23.5416
397	6	Q76LL6_DLCEKDEEEEEEEEQPITEPNSEEEREDDAQCQGK_2xCarbamidomethyl [C3; C32]; 2xPhospho [T18(100); S22(100)]_2xCarbamidomethyl [C3; C32]; 2xPhospho [T18(100); S22(100)]	Q76LL6	Fhod3	5	5	17.5254	21.5866	19.556	0.00162877	0.0599058	-16.6929	6Mo-KO_1Way down vs WT	-67.2711	-4.14222	-4.06116	Q76LL6	DLCEKDEEEEEEEEQPITEPNSEEEREDDAQCQGK	2xCarbamidomethyl [C3; C32]; 2xPhospho [T18(100); S22(100)]	2xCarbamidomethyl [C3; C32]; 2xPhospho [T18(100); S22(100)]	NP_001276583	0.0438671	0.00237867	Fhod3	formin homology 2 domain containing 3	225288	Fhod3	18|18 A2	protein-coding	-6s	17.4966	17.8704	17.6864	17.6313	16.9425	20.6098	22.9824	19.1581	21.1966	23.9861
954	7	P35486_YHGHSMSDPGVSYR_1xOxidation [M6]; 2xPhospho [S5(100); S12(100)]_1xOxidation [M6]; 2xPhospho [Y1(0); S5(100); S7(0); S12(100); Y13(0)]	P35486	Pdha1	5	5	27.8584	28.5891	28.2237	0.00308418	0.602578	-1.65954	6Mo-KO_1Way down vs WT	-2.19472	-1.25486	-0.73078	P35486	YHGHSMSDPGVSYR	1xOxidation [M6]; 2xPhospho [S5(100); S12(100)]	1xOxidation [M6]; 2xPhospho [Y1(0); S5(100); S7(0); S12(100); Y13(0)]	NP_032836	3.06903e-05	0.000420153	Pdha1	pyruvate dehydrogenase E1 alpha 1	18597	Pdha1	X F4|X 73.95 cM	protein-coding	-1s	27.7755	27.8684	28.0634	27.7755	27.809	28.1908	28.3963	28.7592	28.4534	29.146
1035	8	E9PUK6_RASPSPPPK_2xPhospho [S3(100); S5(100)]_2xPhospho [S3(100); S5(100)]	E9PUK6	Srrm1	5	5	18.8709	23.2247	21.0478	0.00332586	0.0489089	-20.4462	6Mo-KO_1Way down vs WT	-110.526	-3.78233	-4.35376	E9PUK6	RASPSPPPK	2xPhospho [S3(100); S5(100)]	2xPhospho [S3(100); S5(100)]	NP_058079	0.00189257	0.000420153	Srrm1	serine/arginine repetitive matrix 1	51796	Srrm1	4|4 D3	protein-coding	-6s	15.9805	18.6645	18.6394	20.7455	20.3246	23.4025	21.258	23.0508	23.1204	25.2916
1212	9	Q8CH02_TGLGLSSPTGPVK_2xPhospho [T1(98.8); T9(79.7)]_2xPhospho [T1(98.8); S6(17.5); S7(4); T9(79.7)]	Q8CH02	Sugp1	5	5	22.4627	15.6953	19.079	0.00351833	108.944	108.944	6Mo-KO_1Way up vs WT	7.70362	1540.67	6.76744	Q8CH02	TGLGLSSPTGPVK	2xPhospho [T1(98.8); T9(79.7)]	2xPhospho [T1(98.8); S6(17.5); S7(4); T9(79.7)]	NP_081757	0.0984258	0.00392242	Sugp1	SURP and G patch domain containing 1	70616	Sugp1	8|8 B3.3	protein-coding	> +6s	25.2676	23.2039	24.1721	23.4009	16.2691	16.2641	15.6863	15.6863	14.0266	16.8131
629	10	P14873_SLMSSPEDLTKDFEELKAEEIDVAK_1xOxidation [M3]; 2xPhospho [T10(91.7); S]_1xOxidation [M3]; 2xPhospho [S1(19.4); S4(19.4); S5(69.5); T10(91.7)]	P14873	Map1b	5	5	18.7663	22.2715	20.5189	0.00431827	0.0880655	-11.3552	6Mo-KO_1Way down vs WT	-47.1367	-2.73546	-3.50528	P14873	SLMSSPEDLTKDFEELKAEEIDVAK	1xOxidation [M3]; 2xPhospho [T10(91.7); S]	1xOxidation [M3]; 2xPhospho [S1(19.4); S4(19.4); S5(69.5); T10(91.7)]	NP_032660	0.0146742	0.00109972	Map1b	microtubule-associated protein 1B	17755	Map1b	13 D1|13 52.9 cM	protein-coding	-6s	18.5079	19.1325	18.4691	17.8704	19.8514	22.8269	21.1143	23.2117	19.757	24.4478
585	11	Q9JKS4_SKRPIPISTTAPPIQSPLPVIPHQKDPALDTNGSLATPSPSPEAR_1xDeamidated [N/Q]; 2xPhospho [T37(76.4); S41(91.5)]_1xDeamidated [Q15; N32]; 2xPhospho [S1(0); S8(0); T9(0); T10(0); S16(0); T31(0.1); S34(22.9); T37(76.4); S39(9.1); S41(91.5)]	Q9JKS4	Ldb3	5	5	16.9485	20.9808	18.9646	0.00598291	0.061118	-16.3618	6Mo-KO_1Way down vs WT	-93.097	-2.87559	-4.03226	Q9JKS4	SKRPIPISTTAPPIQSPLPVIPHQKDPALDTNGSLATPSPSPEAR	1xDeamidated [N/Q]; 2xPhospho [T37(76.4); S41(91.5)]	1xDeamidated [Q15; N32]; 2xPhospho [S1(0); S8(0); T9(0); T10(0); S16(0); T31(0.1); S34(22.9); T37(76.4); S39(9.1); S41(91.5)]	NP_001034160	0.0151955	0.00109972	Ldb3	LIM domain binding 3	24131	Ldb3	14|14 B	protein-coding	-6s	16.2691	17.5653	17.0449	19.8368	14.0266	21.7624	21.8903	19.2403	20.1496	21.8614
1041	12	E9PUK6_RHSPSPRPR_2xPhospho [S3(100); S5(100)]_2xPhospho [S3(100); S5(100)]	E9PUK6	Srrm1	5	5	15.4809	21.8762	18.6786	0.00860418	0.0118805	-84.1715	6Mo-KO_1Way down vs WT	-1619.23	-4.37543	-6.39526	E9PUK6	RHSPSPRPR	2xPhospho [S3(100); S5(100)]	2xPhospho [S3(100); S5(100)]	NP_058079	0.0677811	0.00288454	Srrm1	serine/arginine repetitive matrix 1	51796	Srrm1	4|4 D3	protein-coding	= -6s	15.3372	16.2691	15.6888	14.7724	15.3372	23.2297	25.3855	22.7934	14.7707	23.2017
725	13	Q9JJW5_VDGSNLEGGSQQGPSTPPNTPDPRSPPNPENIAPGYSGPLK_2xDeamidated [Q/N]; 2xPhospho [S4(96.4); S25(89.4)]_2xDeamidated [N5; Q11; Q12; N28; N31]; 2xPhospho [S4(96.4); S10(1.6); S15(0.7); T16(1.6); T20(10.3); S25(89.4); Y36(0); S37(0.1)]	Q9JJW5	Myoz2	5	5	22.8248	24.5907	23.7078	0.0102604	0.294043	-3.40086	6Mo-KO_1Way down vs WT	-7.92173	-1.46002	-1.7659	Q9JJW5	VDGSNLEGGSQQGPSTPPNTPDPRSPPNPENIAPGYSGPLK	2xDeamidated [Q/N]; 2xPhospho [S4(96.4); S25(89.4)]	2xDeamidated [N5; Q11; Q12; N28; N31]; 2xPhospho [S4(96.4); S10(1.6); S15(0.7); T16(1.6); T20(10.3); S25(89.4); Y36(0); S37(0.1)]	NP_067478	0.00642379	0.000644898	Myoz2	myozenin 2	59006	Myoz2	3|3 G1	protein-coding	-3s	22.7468	23.6565	23.1998	22.3504	22.1703	24.4616	23.9554	24.1187	24.0473	26.3703
1113	14	Q61165_IPSAVSTVSMQNIHPK_2xPhospho [S9(100); S/T]_2xPhospho [S3(0.9); S6(49.6); T7(49.6); S9(100)]	Q61165	Slc9a1	5	5	19.7571	21.9768	20.8669	0.0125948	0.21468	-4.65809	6Mo-KO_1Way down vs WT	-14.1123	-1.53751	-2.21974	Q61165	IPSAVSTVSMQNIHPK	2xPhospho [S9(100); S/T]	2xPhospho [S3(0.9); S6(49.6); T7(49.6); S9(100)]	NP_058677	0.0668741	0.00288454	Slc9a1	solute carrier family 9 (sodium/hydrogen exchanger), member 1	20544	Slc9a1	4 D2.3|4 66.25 cM	protein-coding	-3s	20.1094	20.5995	20.7116	19.7335	17.6313	21.9352	21.4481	21.6884	21.2615	23.5508
1147	15	B2RXQ9_SLDSAETYSQHAQSLDGTMGSSIPLYR_2xPhospho [S4(94.3); T18(77.7)]_2xPhospho [S1(5.7); S4(94.3); T7(1.2); Y8(0.1); S9(1.2); S14(18.5); T18(77.7); S21(1.2); S22(0.1); Y26(0)]	B2RXQ9	Sorbs2	5	5	25.0854	25.5238	25.3046	0.012715	0.737973	-1.35506	6Mo-KO_1Way down vs WT	-1.68738	-1.08819	-0.43836	B2RXQ9	SLDSAETYSQHAQSLDGTMGSSIPLYR	2xPhospho [S4(94.3); T18(77.7)]	2xPhospho [S1(5.7); S4(94.3); T7(1.2); Y8(0.1); S9(1.2); S14(18.5); T18(77.7); S21(1.2); S22(0.1); Y26(0)]	NP_001297636	0.00754793	0.000644898	Sorbs2	sorbin and SH3 domain containing 2	234214	Sorbs2	8|8 B1.1	protein-coding	-1s	25.122	24.9755	25.2335	25.3633	24.7328	25.7382	25.5885	25.3089	25.6353	25.348
247	16	Q63918_LEDQMQEDREEGSFTEGLSEASLPSGLMEGSAEDAEK_1xOxidation [M5]; 1xPhospho [S/T]_1xOxidation [M5]; 1xPhospho [S13(46.3); T15(46.3); S19(5); S22(1.8); S25(0.7); S31(0)]	Q63918	Cavin2	5	5	18.3093	20.2393	19.2743	0.0127668	0.262436	-3.81045	6Mo-KO_1Way down vs WT	-10.0162	-1.4496	-1.92996	Q63918	LEDQMQEDREEGSFTEGLSEASLPSGLMEGSAEDAEK	1xOxidation [M5]; 1xPhospho [S/T]	1xOxidation [M5]; 1xPhospho [S13(46.3); T15(46.3); S19(5); S22(1.8); S25(0.7); S31(0)]	NP_620080	0.0673262	0.00288454	Cavin2	caveolae associated 2	20324	Cavin2	1|1 C1.1	protein-coding	-3s	17.7468	18.4419	18.5572	18.424	18.3768	20.0357	21.1467	18.3207	19.9481	21.7453
179	17	E9Q559_SAAEMVLSDDNFASIVAAVEEGR_1xDeamidated [N11]; 1xOxidation [M5]; 1xPhospho [S1(98.8)]_1xDeamidated [N11]; 1xOxidation [M5]; 1xPhospho [S1(98.8); S8(0.2); S14(1)]	E9Q559	Atp2a3	5	5	18.9994	21.883	20.4412	0.0130665	0.135503	-7.37989	6Mo-KO_1Way down vs WT	-31.4935	-1.72933	-2.8836	E9Q559	SAAEMVLSDDNFASIVAAVEEGR	1xDeamidated [N11]; 1xOxidation [M5]; 1xPhospho [S1(98.8)]	1xDeamidated [N11]; 1xOxidation [M5]; 1xPhospho [S1(98.8); S8(0.2); S14(1)]	NP_001156809	0.0133069	0.00109972	Atp2a3	ATPase, Ca++ transporting, ubiquitous	53313	Atp2a3	11|11 B4	protein-coding	-6s	19.5993	19.5894	17.6313	18.3768	19.8	23.8115	23.8496	20.9264	20.5779	20.2494
424	18	P63250_ISSVPGNSEEK_1xPhospho [S3(88.8)]_1xPhospho [S2(11.2); S3(88.8); S8(0)]	P63250	Kcnj3	5	5	21.4974	23.1555	22.3265	0.0138809	0.316856	-3.15601	6Mo-KO_1Way down vs WT	-7.34726	-1.35566	-1.6581	P63250	ISSVPGNSEEK	1xPhospho [S3(88.8)]	1xPhospho [S2(11.2); S3(88.8); S8(0)]	NP_032452	0.032856	0.00203657	Kcnj3	potassium inwardly-rectifying channel, subfamily J, member 3	16519	Kcnj3	2|2 C1.1	protein-coding	-3s	21.4561	21.5814	21.2838	21.9966	21.1692	23.572	22.4061	21.9352	22.9973	24.867
158	19	Q8VBT1_MSEKEDQVQRTSEEEPEPSVSENEEVDAEEANSFQK_2xPhospho [S2(97); T/S]_2xPhospho [S2(97); T11(68); S12(26); S19(4.5); S21(4.5); S33(0)]	Q8VBT1	Txlnb	5	5	20.3173	18.7946	19.5559	0.014838	2.87328	2.87328	6Mo-KO_1Way up vs WT	1.30784	6.31253	1.5227	Q8VBT1	MSEKEDQVQRTSEEEPEPSVSENEEVDAEEANSFQK	2xPhospho [S2(97); T/S]	2xPhospho [S2(97); T11(68); S12(26); S19(4.5); S21(4.5); S33(0)]	NP_619534	0.161424	0.00980824	Txlnb	taxilin beta	378431	Txlnb	10|10 A2	protein-coding	+3s	19.4515	19.8108	20.2718	20.6816	21.3709	18.6902	19.7031	18.1328	17.9129	19.5341
783	20	A2BGG7_NYQQNYQNSESGEKNEGSESAPEGQAQQR_1xPhospho [S18(96.8)]_1xPhospho [Y2(0); Y6(0); S9(0); S11(0); S18(96.8); S20(3.2)]	A2BGG7	---	5	5	22.4798	21.5859	22.0328	0.0155801	1.85824	1.85824	6Mo-KO_1Way up vs WT	1.16497	2.96408	0.89394	A2BGG7	NYQQNYQNSESGEKNEGSESAPEGQAQQR	1xPhospho [S18(96.8)]	1xPhospho [Y2(0); Y6(0); S9(0); S11(0); S18(96.8); S20(3.2)]	---	0.00739086	0.000644898	Ybx1	Y box protein 1	22608	Ybx1	4|4 D2.1	protein-coding	+2s	22.2358	23.0283	22.6836	22.3735	22.0778	21.2545	21.5151	21.299	21.3398	22.5209
1448	21	A0A498WFS2_SSPPATDPGPVPSSPSQEPPTK_1xPhospho [S/T]_1xPhospho [S1(49.4); S2(49.4); T6(1.1); S13(0); S14(0); S16(0); T21(0)]	A0A498WFS2	---	5	5	20.1149	23.7035	21.9092	0.0156956	0.0831258	-12.03	6Mo-KO_1Way down vs WT	-78.6349	-1.8404	-3.58856	A0A498WFS2	SSPPATDPGPVPSSPSQEPPTK	1xPhospho [S/T]	1xPhospho [S1(49.4); S2(49.4); T6(1.1); S13(0); S14(0); S16(0); T21(0)]	---	0.00452284	0.000644898	Ubxn1	UBX domain protein 1	225896	Ubxn1	19|19 A	protein-coding	-6s	17.6313	21.9033	21.3678	17.4966	22.1757	23.8071	24.4807	22.2402	22.8486	25.1409
219	22	Q65CL1_QQDLKSPSQR_1xPhospho [S6(94.3)]_1xPhospho [S6(94.3); S8(5.8)]	Q65CL1	Ctnna3	5	5	21.8814	23.2346	22.558	0.0169088	0.391417	-2.55482	6Mo-KO_1Way down vs WT	-5.24601	-1.2442	-1.35322	Q65CL1	QQDLKSPSQR	1xPhospho [S6(94.3)]	1xPhospho [S6(94.3); S8(5.8)]	NP_001157848	0.0326299	0.00181132	Ctnna3	catenin (cadherin associated protein), alpha 3	216033	Ctnna3	10|10 B4- B5.1	protein-coding	-2s	21.2347	21.8063	21.826	22.4092	22.1308	23.7511	22.3507	22.4094	23.1812	24.4807
451	23	Q3UHU8_INTKALQSPK_1xDeamidated [N2]; 2xPhospho [T3(100); S8(100)]_1xDeamidated [N2; Q7]; 2xPhospho [T3(100); S8(100)]	Q3UHU8	Gtf2i	5	5	22.5065	17.7928	20.1497	0.017437	26.2401	26.2401	6Mo-KO_1Way up vs WT	2.10465	327.153	4.7137	Q3UHU8	INTKALQSPK	1xDeamidated [N2]; 2xPhospho [T3(100); S8(100)]	1xDeamidated [N2; Q7]; 2xPhospho [T3(100); S8(100)]	NP_001074218	0.122062	0.00595432	Gtf2i	general transcription factor II I	14886	Gtf2i	5 G2|5 74.48 cM	protein-coding	> +6s	23.7203	20.9458	22.7717	21.387	23.7078	23.6069	15.9775	16.2641	15.9775	17.1381
151	24	P59017_SHTGEAAAVR_1xPhospho [T3(98)]_1xPhospho [S1(2); T3(98)]	P59017	Bcl2l13	5	5	21.3907	23.3422	22.3665	0.0174972	0.258558	-3.8676	6Mo-KO_1Way down vs WT	-11.001	-1.35972	-1.95144	P59017	SHTGEAAAVR	1xPhospho [T3(98)]	1xPhospho [S1(2); T3(98)]	NP_705736	0.046976	0.00237867	Bcl2l13	BCL2-like 13 (apoptosis facilitator)	94044	Bcl2l13	6 F1|6 57.01 cM	protein-coding	-3s	20.5461	21.7745	20.7767	20.2854	23.571	23.5416	23.9379	23.3051	22.3896	23.5367
634	25	A0A0A0MQC7_TDHGAEIVYKSPVVSGDTSPR_3xPhospho [S11(100); S15(98.2); S19(78.9)]_3xPhospho [T1(0); Y9(0); S11(100); S15(98.2); T18(23); S19(78.9)]	A0A0A0MQC7	---	5	5	20.4144	22.2272	21.3208	0.0186568	0.284646	-3.51314	6Mo-KO_1Way down vs WT	-9.40687	-1.31203	-1.81276	A0A0A0MQC7	TDHGAEIVYKSPVVSGDTSPR	3xPhospho [S11(100); S15(98.2); S19(78.9)]	3xPhospho [T1(0); Y9(0); S11(100); S15(98.2); T18(23); S19(78.9)]	---	0.00506046	0.000644898	Mapt	microtubule-associated protein tau	17762	Mapt	11 67.79 cM|11 E1	protein-coding	-3s	21.2619	19.6397	21.3441	19.4904	20.336	22.1442	23.4651	21.5633	20.8747	23.0886
286	26	Q923F1_LGEESKEPLSDEDEEDNDDVEPISEFR_1xDeamidated [N17]; 1xPhospho [S10(97.9)]_1xDeamidated [N17]; 1xPhospho [S5(2); S10(97.9); S24(0)]	Q923F1	Clns1a	5	5	21.8433	19.7269	20.7851	0.0200774	4.33629	4.33629	6Mo-KO_1Way up vs WT	1.34722	13.9572	2.11646	Q923F1	LGEESKEPLSDEDEEDNDDVEPISEFR	1xDeamidated [N17]; 1xPhospho [S10(97.9)]	1xDeamidated [N17]; 1xPhospho [S5(2); S10(97.9); S24(0)]	NP_076160	0.0506415	0.00252693	Clns1a	chloride channel, nucleotide-sensitive, 1A	12729	Clns1a	7 E1|7 53.57 cM	protein-coding	+3s	21.2744	22.1526	21.6088	21.1061	23.0748	21.1097	18.2196	19.321	18.6368	21.3473
950	27	P35486_YHGHSMSDPGVSYR_2xPhospho [S5(100); S12(100)]_2xPhospho [Y1(0); S5(100); S7(0); S12(100); Y13(0)]	P35486	Pdha1	5	5	29.5916	30.4244	30.008	0.0203225	0.561415	-1.78121	6Mo-KO_1Way down vs WT	-2.82516	-1.12302	-0.83286	P35486	YHGHSMSDPGVSYR	2xPhospho [S5(100); S12(100)]	2xPhospho [Y1(0); S5(100); S7(0); S12(100); Y13(0)]	NP_032836	3.06903e-05	0.000420153	Pdha1	pyruvate dehydrogenase E1 alpha 1	18597	Pdha1	X F4|X 73.95 cM	protein-coding	-2s	30.013	29.8443	29.6804	28.9688	29.4513	29.8479	30.5728	30.5728	30.0197	31.1089
330	28	Q60710_TPPSTPPATANLSADDDFQNTDLR_2xPhospho [T1(99); S/T]_2xPhospho [T1(99); S4(50); T5(50); T9(1); S13(0); T21(0)]	Q60710	Samhd1	5	5	23.8632	23.2486	23.5559	0.0229412	1.53107	1.53107	6Mo-KO_1Way up vs WT	1.07902	2.1725	0.61454	Q60710	TPPSTPPATANLSADDDFQNTDLR	2xPhospho [T1(99); S/T]	2xPhospho [T1(99); S4(50); T5(50); T9(1); S13(0); T21(0)]	NP_001132992	0.00163281	0.000420153	Samhd1	SAM domain and HD domain, 1	56045	Samhd1	2|2 H1	protein-coding	+1s	23.842	24.015	23.7631	23.4819	24.2138	23.6576	22.8654	23.6451	23.2568	22.8182
724	29	Q9JJW5_VDGSNLEGGSQQGPSTPPNTPDPRSPPNPENIAPGYSGPLK_1xDeamidated [Q/N]; 2xPhospho [S10(80.5); S25(95.8)]_1xDeamidated [N5; Q11; Q12; N19; N28; N31]; 2xPhospho [S4(8.3); S10(80.5); S15(8.6); T16(3.2); T20(3.5); S25(95.8); Y36(0); S37(0)]	Q9JJW5	Myoz2	5	5	22.8015	24.0571	23.4293	0.023147	0.418825	-2.38763	6Mo-KO_1Way down vs WT	-4.88757	-1.16638	-1.25558	Q9JJW5	VDGSNLEGGSQQGPSTPPNTPDPRSPPNPENIAPGYSGPLK	1xDeamidated [Q/N]; 2xPhospho [S10(80.5); S25(95.8)]	1xDeamidated [N5; Q11; Q12; N19; N28; N31]; 2xPhospho [S4(8.3); S10(80.5); S15(8.6); T16(3.2); T20(3.5); S25(95.8); Y36(0); S37(0)]	NP_067478	0.00642379	0.000644898	Myoz2	myozenin 2	59006	Myoz2	3|3 G1	protein-coding	-2s	22.8449	22.9653	21.7812	22.701	23.715	24.0831	23.6631	23.8692	23.3975	25.2724
817	30	A2AJ88_YPETLVRVVQIIMVR_1xDeamidated [Q10]; 1xOxidation [M13]; 2xPhospho [Y1(100); T4(100)]_1xDeamidated [Q10]; 1xOxidation [M13]; 2xPhospho [Y1(100); T4(100)]	A2AJ88	Pnpla7	5	5	19.9378	22.6145	21.2762	0.0233219	0.156392	-6.39418	6Mo-KO_1Way down vs WT	-29.5276	-1.38466	-2.67676	A2AJ88	YPETLVRVVQIIMVR	1xDeamidated [Q10]; 1xOxidation [M13]; 2xPhospho [Y1(100); T4(100)]	1xDeamidated [Q10]; 1xOxidation [M13]; 2xPhospho [Y1(100); T4(100)]	NP_666363	0.0447782	0.00237867	Pnpla7	patatin-like phospholipase domain containing 7	241274	Pnpla7	2|2 A3	protein-coding	-6s	19.0032	19.7175	18.0396	20.166	22.7626	23.3182	23.782	21.3771	21.2545	23.3409
869	31	A0A0U1RPA0_SISVPPSPSDIPPPGPPRPFPPR_2xPhospho [S9(83.7); S]_2xPhospho [S1(50); S3(50); S7(16.3); S9(83.7)]	A0A0U1RPA0	---	5	5	23.8569	22.4943	23.1756	0.024376	2.57152	2.57152	6Mo-KO_1Way up vs WT	1.17071	5.64845	1.36262	A0A0U1RPA0	SISVPPSPSDIPPPGPPRPFPPR	2xPhospho [S9(83.7); S]	2xPhospho [S1(50); S3(50); S7(16.3); S9(83.7)]	---	0.00207366	0.000420153	Plekha7	pleckstrin homology domain containing, family A member 7	233765	Plekha7	7|7 F1	protein-coding	+2s	23.3	24.2414	23.6674	23.7868	24.2888	21.1652	22.5799	23.294	23.6244	21.8078
570	32	Q14BP6_VLDISHNGFGDSGASAIGDALR_1xDeamidated [N7]; 2xPhospho [S5(99.9); S12(90.4)]_1xDeamidated [N7]; 2xPhospho [S5(99.9); S12(90.4); S15(9.7)]	Q14BP6	Lrrc74b	5	5	24.5084	21.7189	23.1136	0.0244985	6.91361	6.91361	6Mo-KO_1Way up vs WT	1.37817	34.6823	2.78944	Q14BP6	VLDISHNGFGDSGASAIGDALR	1xDeamidated [N7]; 2xPhospho [S5(99.9); S12(90.4)]	1xDeamidated [N7]; 2xPhospho [S5(99.9); S12(90.4); S15(9.7)]	NP_001138907	0.156456	0.00946967	Lrrc74b	leucine rich repeat containing 74B	74685	Lrrc74b	16|16 A3	protein-coding	+6s	24.1257	24.4858	24.3551	24.3551	25.2202	20.9065	20.537	19.146	23.477	24.5282
1190	33	A0A087WSE3_GSSAESALPR_1xPhospho [S3(99.9)]_1xPhospho [S2(0.1); S3(99.9); S6(0)]	A0A087WSE3	---	5	5	22.0368	21.5599	21.7983	0.0249203	1.39179	1.39179	6Mo-KO_1Way up vs WT	1.05521	1.83573	0.47694	A0A087WSE3	GSSAESALPR	1xPhospho [S3(99.9)]	1xPhospho [S2(0.1); S3(99.9); S6(0)]	---	0.00133163	0.000420153	Speg	SPEG complex locus	11790	Speg	1 C4|1 38.88 cM	protein-coding	+1s	21.8408	22.0905	21.7875	22.5256	21.9397	21.7828	21.4296	21.2953	21.8658	21.4259
652	34	E9Q1I5_GSSQLDVNEEVEALIVK_1xPhospho [S2(80.1)]_1xPhospho [S2(80.1); S3(19.9)]	E9Q1I5	---	5	5	18.0862	19.7293	18.9078	0.0268398	0.320181	-3.12323	6Mo-KO_1Way down vs WT	-8.24438	-1.18318	-1.64304	E9Q1I5	GSSQLDVNEEVEALIVK	1xPhospho [S2(80.1)]	1xPhospho [S2(80.1); S3(19.9)]	---	0.122852	0.00595432	Abcc1	ATP-binding cassette, sub-family C (CFTR/MRP), member 1	17250	Abcc1	16|16 A1	protein-coding	-3s	17.0449	18.0396	17.7998	19.4617	18.0851	18.8839	20.1983	18.4662	20.0792	21.0187
1375	35	A2ASS6_TPSPIEAER_1xPhospho [S3(100)]_1xPhospho [T1(0); S3(100)]	A2ASS6	---	5	5	24.3225	23.712	24.0173	0.0301332	1.52685	1.52685	6Mo-KO_1Way up vs WT	1.05366	2.21255	0.61056	A2ASS6	TPSPIEAER	1xPhospho [S3(100)]	1xPhospho [T1(0); S3(100)]	---	0.00154351	0.000420153	Ttn	titin	22138	Ttn	2 C3|2 45.13 cM	protein-coding	+1s	23.8856	24.1309	23.9256	25.0242	24.6464	23.6842	23.7211	23.782	23.8956	23.477
754	36	A0A0G2JEX1_KREDEEEEEGSIVNGSTTEDEEQTR_1xDeamidated [N14]; 1xPhospho [S11(99.9)]_1xDeamidated [N14]; 1xPhospho [S11(99.9); S16(0); T17(0); T18(0); T24(0)]	A0A0G2JEX1	---	5	5	22.1459	20.879	21.5125	0.0322955	2.40637	2.40637	6Mo-KO_1Way up vs WT	1.09986	5.26487	1.26686	A0A0G2JEX1	KREDEEEEEGSIVNGSTTEDEEQTR	1xDeamidated [N14]; 1xPhospho [S11(99.9)]	1xDeamidated [N14]; 1xPhospho [S11(99.9); S16(0); T17(0); T18(0); T24(0)]	---	0.0261488	0.00132202	Nexn	nexilin	68810	Nexn	3|3 H3	protein-coding	+2s	21.8593	21.9507	21.9909	21.6165	23.312	20.62	19.6917	21.3359	22.0215	20.726
542	37	E9Q238_SYSAGNASQLELLAR_1xPhospho [S3(99)]_1xPhospho [S1(1); Y2(0); S3(99); S8(0)]	E9Q238	Kank1	5	5	20.5169	21.4457	20.9813	0.0323908	0.525317	-1.90361	6Mo-KO_1Way down vs WT	-3.38092	-1.07182	-0.92874	E9Q238	SYSAGNASQLELLAR	1xPhospho [S3(99)]	1xPhospho [S1(1); Y2(0); S3(99); S8(0)]	NP_852069	7.13861e-05	0.000420153	Kank1	KN motif and ankyrin repeat domains 1	107351	Kank1	19|19 B	protein-coding	-2s	19.9508	20.4053	19.9845	21.3142	20.9299	21.6249	21.7624	20.5125	21.4893	21.8393
906	38	A2A842_SLDGAAAAESTDR_1xPhospho [S1(100)]_1xPhospho [S1(100); S10(0); T11(0)]	A2A842	---	5	5	21.0852	19.7423	20.4138	0.0325	2.53664	2.53664	6Mo-KO_1Way up vs WT	1.10472	5.82458	1.34292	A2A842	SLDGAAAAESTDR	1xPhospho [S1(100)]	1xPhospho [S1(100); S10(0); T11(0)]	---	0.0990755	0.00392242	Epb41	erythrocyte membrane protein band 4.1	269587	Epb41	4 D2.3|4 64.54 cM	protein-coding	+2s	20.7196	22.0017	20.4792	21.3513	20.8742	18.6131	20.9018	19.2195	20.6736	19.3034
727	39	Q9JJW5_VDGSNLEGGSQQGPSTPPNTPDPRSPPNPENIAPGYSGPLK_1xDeamidated [N/Q]; 3xPhospho [T20(88.8); S25(94.3); S/T/Y]_1xDeamidated [N5; Q11; Q12; N19; N28; N31]; 3xPhospho [S4(16); S10(70.5); S15(12.8); T16(12.8); T20(88.8); S25(94.3); Y36(1.8); S37(3.1)]	Q9JJW5	Myoz2	5	5	23.1018	20.4464	21.7741	0.0341084	6.30004	6.30004	6Mo-KO_1Way up vs WT	1.19354	33.2543	2.65536	Q9JJW5	VDGSNLEGGSQQGPSTPPNTPDPRSPPNPENIAPGYSGPLK	1xDeamidated [N/Q]; 3xPhospho [T20(88.8); S25(94.3); S/T/Y]	1xDeamidated [N5; Q11; Q12; N19; N28; N31]; 3xPhospho [S4(16); S10(70.5); S15(12.8); T16(12.8); T20(88.8); S25(94.3); Y36(1.8); S37(3.1)]	NP_067478	0.00642379	0.000644898	Myoz2	myozenin 2	59006	Myoz2	3|3 G1	protein-coding	+6s	21.3364	21.3643	26.0711	24.5416	22.1956	21.5801	20.1496	19.7306	19.4046	21.3673
1119	40	A0A286YD34_TPVDYIDLPYSSSPSRSATVSPQPSHHSLSAGPDLTESEK_1xDeamidated [Q23]; 3xPhospho [S11(78.4); S/T/Y]_1xDeamidated [Q23]; 3xPhospho [T1(0.2); Y5(0.3); Y10(3); S11(78.4); S12(53.9); S13(53.9); S15(19.3); S17(72.8); T19(12.4); S21(5.6); S25(0.2); S28(0.1); S3¬'╓$b*	A0A286YD34	---	5	5	21.8889	20.0787	20.9838	0.0343792	3.50676	3.50676	6Mo-KO_1Way up vs WT	1.12563	10.9249	1.81014	A0A286YD34	TPVDYIDLPYSSSPSRSATVSPQPSHHSLSAGPDLTESEK	1xDeamidated [Q23]; 3xPhospho [S11(78.4); S/T/Y]	1xDeamidated [Q23]; 3xPhospho [T1(0.2); Y5(0.3); Y10(3); S11(78.4); S12(53.9); S13(53.9); S15(19.3); S17(72.8); T19(12.4); S21(5.6); S25(0.2); S28(0.1); S3¬'╓$b*	---	0.0576299	0.00252693	Sorbs1	sorbin and SH3 domain containing 1	20411	Sorbs1	19 C3|19 34.25 cM	protein-coding	+3s	21.5355	21.7049	22.1345	20.821	23.2485	20.0296	18.4401	19.1711	21.2742	21.4787
1475	41	Q8K0L9_HVALHSASNGTPPAGTPPGAR_2xPhospho [T16(100); T/S]_2xPhospho [S6(15.1); S8(15.1); T11(69.7); T16(100)]	Q8K0L9	Zbtb20	5	5	19.4523	21.276	20.3641	0.0376943	0.282499	-3.53983	6Mo-KO_1Way down vs WT	-11.4287	-1.09639	-1.82368	Q8K0L9	HVALHSASNGTPPAGTPPGAR	2xPhospho [T16(100); T/S]	2xPhospho [S6(15.1); S8(15.1); T11(69.7); T16(100)]	NP_001272734	0.0572402	0.00252693	Zbtb20	zinc finger and BTB domain containing 20	56490	Zbtb20	16 B4|16 28.44 cM	protein-coding	-3s	20.0184	20.2264	18.185	19.2806	19.5512	21.0845	22.4287	19.796	20.0357	23.0351
1238	42	Q8BWB1_RVTDEGSVRSPSPGELQVLSPLSPLSPEPPGAPVSQALQPTSLR_2xPhospho [S7(76.3); S/T]_2xPhospho [T3(15.9); S7(76.3); S10(71.4); S12(35.9); S20(0.1); S23(0.2); S26(0.1); S35(0); T41(0); S42(0)]	Q8BWB1	Synpo2l	5	5	18.6267	20.4122	19.5194	0.0398826	0.290063	-3.44752	6Mo-KO_1Way down vs WT	-11.047	-1.0759	-1.78556	Q8BWB1	RVTDEGSVRSPSPGELQVLSPLSPLSPEPPGAPVSQALQPTSLR	2xPhospho [S7(76.3); S/T]	2xPhospho [T3(15.9); S7(76.3); S10(71.4); S12(35.9); S20(0.1); S23(0.2); S26(0.1); S35(0); T41(0); S42(0)]	NP_001297361	0.0429739	0.00237867	Synpo2l	synaptopodin 2-like	68760	Synpo2l	14|14 A3	protein-coding	-3s	18.8192	19.2065	17.7468	17.7998	19.561	21.2953	18.5928	19.7142	20.2298	22.229
887	43	P48678_ASSHSSQSQGGGSVTK_1xPhospho [S3(83.2)]_1xPhospho [S2(15.4); S3(83.2); S5(0.7); S6(0.7); S8(0); S13(0); T15(0)]	P48678	Lmna	5	5	22.1455	20.7051	21.4253	0.0425582	2.71404	2.71404	6Mo-KO_1Way up vs WT	1.04371	7.05748	1.44044	P48678	ASSHSSQSQGGGSVTK	1xPhospho [S3(83.2)]	1xPhospho [S2(15.4); S3(83.2); S5(0.7); S6(0.7); S8(0); S13(0); T15(0)]	NP_001002011	0.0118986	0.000953527	Lmna	lamin A	16905	Lmna	3 F1|3 38.84 cM	protein-coding	+2s	21.8063	22.3101	21.2651	22.065	23.2812	20.051	21.3435	19.6488	20.1434	22.3388
1353	44	A2ASS6_RSLSPTYIELMRPVSELIR_2xPhospho [S2(100); S/T/Y]_2xPhospho [S2(100); S4(50); T6(50); Y7(0); S15(0)]	A2ASS6	---	5	5	18.1844	21.706	19.9452	0.0475309	0.0870761	-11.4842	6Mo-KO_1Way down vs WT	-127.496	-1.03444	-3.52158	A2ASS6	RSLSPTYIELMRPVSELIR	2xPhospho [S2(100); S/T/Y]	2xPhospho [S2(100); S4(50); T6(50); Y7(0); S15(0)]	---	0.0183441	0.00109972	Ttn	titin	22138	Ttn	2 C3|2 45.13 cM	protein-coding	-6s	21.7961	17.9155	16.9425	16.2691	17.9987	24.3545	23.0613	20.0864	17.996	23.0316
434	45	P23242_QASEQNWANYSAEQNR_1xPhospho [S3(100)]_1xPhospho [S3(100); Y10(0); S11(0)]	P23242	Gja1	5	5	19.1845	20.6167	19.9006	0.0478662	0.37056	-2.69862	6Mo-KO_1Way down vs WT	-7.1965	-1.01195	-1.43222	P23242	QASEQNWANYSAEQNR	1xPhospho [S3(100)]	1xPhospho [S3(100); Y10(0); S11(0)]	NP_034418	0.00294672	0.000420153	Gja1	gap junction protein, alpha 1	14609	Gja1	10 B4|10 28.64 cM	protein-coding	-2s	19.0879	19.8771	18.6645	18.6935	19.5993	20.7943	21.3913	19.2042	19.5003	22.1933
1080	46	A2AM76_MAPEVSTAHSGPSAVIDYSK_1xPhospho [S/Y/T]_1xPhospho [S6(0.6); T7(0.6); S10(2.8); S13(21.8); Y18(2.8); S19(71.4)]	A2AM76	---	5	5	18.9938	20.2877	19.6408	0.0518103	0.407853	-2.45187	6Mo-KO_1Way down vs WT	-6.06569	1.00899	-1.29388	A2AM76	MAPEVSTAHSGPSAVIDYSK	1xPhospho [S/Y/T]	1xPhospho [S6(0.6); T7(0.6); S10(2.8); S13(21.8); Y18(2.8); S19(71.4)]	---	0.144152	0.00826345	Pink1	PTEN induced putative kinase 1	68943	Pink1	4|4 D3	protein-coding	-2s	18.4023	18.9481	18.616	20.1527	18.8498	19.8339	20.2494	19.0832	20.2794	21.9924
132	47	F6V3Y9_ETHSRPGSPQEGQSEDTETASNPPEAPGSSHSSSDQQPIYFR_1xDeamidated [N22]; 2xPhospho [T2(95); S/T/Y]_1xDeamidated [N22]; 2xPhospho [T2(95); S4(52.4); S8(52.4); S14(0.1); T17(0); T19(0); S21(0); S29(0); S30(0); S32(0); S33(0); S34(0); Y40(0)]	F6V3Y9	---	5	5	21.4008	20.5052	20.953	0.0596463	1.86036	1.86036	6Mo-KO_1Way up vs WT	-1.03252	3.57349	0.89558	F6V3Y9	ETHSRPGSPQEGQSEDTETASNPPEAPGSSHSSSDQQPIYFR	1xDeamidated [N22]; 2xPhospho [T2(95); S/T/Y]	1xDeamidated [N22]; 2xPhospho [T2(95); S4(52.4); S8(52.4); S14(0.1); T17(0); T19(0); S21(0); S29(0); S30(0); S32(0); S33(0); S34(0); Y40(0)]	---	0.0580222	0.00274627	Atg2a	autophagy related 2A	329015	Atg2a	19|19 A	protein-coding	+2s	21.9827	21.0657	21.5397	21.2504	21.1653	20.4657	20.8111	21.047	21.1189	19.0832
268	48	Q63918_FQHPNTDMLQEKPSSPSPMPSSTPSPSLNLGSTEEAIR_1xDeamidated [N]; 2xPhospho [T6(97.4); S/T]_1xDeamidated [N5; N29]; 2xPhospho [T6(97.4); S14(1.9); S15(0.6); S17(0.4); S21(14.5); S22(14.5); T23(14.5); S25(56); S27(0.3); S32(0); T33(0)]	Q63918	Cavin2	5	5	23.4124	21.4129	22.4126	0.0621562	3.99839	3.99839	6Mo-KO_1Way up vs WT	-1.09334	17.4794	1.99942	Q63918	FQHPNTDMLQEKPSSPSPMPSSTPSPSLNLGSTEEAIR	1xDeamidated [N]; 2xPhospho [T6(97.4); S/T]	1xDeamidated [N5; N29]; 2xPhospho [T6(97.4); S14(1.9); S15(0.6); S17(0.4); S21(14.5); S22(14.5); T23(14.5); S25(56); S27(0.3); S32(0); T33(0)]	NP_620080	0.0531159	0.00252693	Cavin2	caveolae associated 2	20324	Cavin2	1|1 C1.1	protein-coding	+3s	21.5	21.0552	24.8228	25.0922	24.5916	21.073	20.8614	20.9345	21.9715	22.2243
1120	49	A0A286YD34_SATVSPQPSHHSLSAGPDLTESEK_2xPhospho [T3(97.7); S5(86.6)]_2xPhospho [S1(15.5); T3(97.7); S5(86.6); S9(0.1); S12(0); S14(0); T20(0); S22(0)]	A0A286YD34	---	5	5	25.8515	25.3878	25.6197	0.065658	1.37909	1.37909	6Mo-KO_1Way up vs WT	-1.02669	1.95267	0.46372	A0A286YD34	SATVSPQPSHHSLSAGPDLTESEK	2xPhospho [T3(97.7); S5(86.6)]	2xPhospho [S1(15.5); T3(97.7); S5(86.6); S9(0.1); S12(0); S14(0); T20(0); S22(0)]	---	0.00268948	0.000420153	Sorbs1	sorbin and SH3 domain containing 1	20411	Sorbs1	19 C3|19 34.25 cM	protein-coding	+1s	26.2926	25.8114	25.7118	25.7425	25.6994	24.867	25.3748	25.127	25.9281	25.6422
1228	50	Q8BWB1_AGGAESGPEEDALSLGAEACNFMQPLGGR_1xCarbamidomethyl [C20]; 1xDeamidated [N/Q]; 1xPhospho [S6(100)]_1xCarbamidomethyl [C20]; 1xDeamidated [N21; Q24]; 1xPhospho [S6(100); S14(0)]	Q8BWB1	Synpo2l	5	5	20.671	19.7064	20.1887	0.0667958	1.95147	1.95147	6Mo-KO_1Way up vs WT	-1.06031	4.03791	0.96456	Q8BWB1	AGGAESGPEEDALSLGAEACNFMQPLGGR	1xCarbamidomethyl [C20]; 1xDeamidated [N/Q]; 1xPhospho [S6(100)]	1xCarbamidomethyl [C20]; 1xDeamidated [N21; Q24]; 1xPhospho [S6(100); S14(0)]	NP_001297361	0.0600224	0.00288454	Synpo2l	synaptopodin 2-like	68760	Synpo2l	14|14 A3	protein-coding	+2s	20.8906	20.4635	20.0753	20.7148	21.2107	19.4492	21.0557	18.5928	19.348	20.0864
528	51	Q9ET78_SPARPASEHMAIEALQPPPAPSQEPEVAMYR_2xPhospho [S1(100); S7(100)]_2xPhospho [S1(100); S7(100); S22(0); Y30(0)]	Q9ET78	Jph2	5	5	20.0761	21.5731	20.8246	0.0684132	0.354284	-2.82259	6Mo-KO_1Way down vs WT	-8.7973	1.10421	-1.49702	Q9ET78	SPARPASEHMAIEALQPPPAPSQEPEVAMYR	2xPhospho [S1(100); S7(100)]	2xPhospho [S1(100); S7(100); S22(0); Y30(0)]	NP_001192005	0.131854	0.00686468	Jph2	junctophilin 2	59091	Jph2	2|2 H3	protein-coding	-2s	19.4904	19.751	19.8678	19.3678	21.9033	20.4828	22.2147	20.62	21.2033	23.3446
522	52	Q9ET80_QSHSPQPSSPEPSKK_2xPhospho [S4(83.9); S]_2xPhospho [S2(16); S4(83.9); S8(13.8); S9(13.8); S13(72.6)]	Q9ET80	Jph1	5	5	20.4055	22.7421	21.5738	0.0685057	0.197987	-5.05083	6Mo-KO_1Way down vs WT	-29.8016	1.16819	-2.33652	Q9ET80	QSHSPQPSSPEPSKK	2xPhospho [S4(83.9); S]	2xPhospho [S2(16); S4(83.9); S8(13.8); S9(13.8); S13(72.6)]	NP_065629	0.0432696	0.00237867	Jph1	junctophilin 1	57339	Jph1	1|1 A3	protein-coding	-6s	22.7942	17.0449	19.6752	21.6772	20.8362	22.0835	21.4548	23.4482	22.3693	24.3545
1046	53	Q8BTI8_GRSRTPLTSR_2xPhospho [S3(96.1); T5(91.4)]_2xPhospho [S3(96.1); T5(91.4); T8(4.8); S9(7.8)]	Q8BTI8	Srrm2	5	5	22.9193	25.3925	24.1559	0.0723451	0.180081	-5.55305	6Mo-KO_1Way down vs WT	-37.5286	1.21702	-2.47328	Q8BTI8	GRSRTPLTSR	2xPhospho [S3(96.1); T5(91.4)]	2xPhospho [S3(96.1); T5(91.4); T8(4.8); S9(7.8)]	NP_780438	0.118178	0.00581091	Srrm2	serine/arginine repetitive matrix 2	75956	Srrm2	17|17 A3.3	protein-coding	-6s	24.0426	23.4276	18.2921	24.3906	24.4434	26.0879	24.8367	25.3748	24.9065	25.7568
1406	54	G3UYW7_TMTTNSSDPFLNSGTYHSR_1xDeamidated [N12]; 2xPhospho [T4(76.2); S13(91.3)]_1xDeamidated [N5; N12]; 2xPhospho [T1(3.5); T3(16); T4(76.2); S6(3.5); S7(0.8); S13(91.3); T15(4.3); Y16(0.1); S18(4.3)]	G3UYW7	---	5	5	23.1268	21.5836	22.3552	0.074356	2.91428	2.91428	6Mo-KO_1Way up vs WT	-1.14202	9.69925	1.54314	G3UYW7	TMTTNSSDPFLNSGTYHSR	1xDeamidated [N12]; 2xPhospho [T4(76.2); S13(91.3)]	1xDeamidated [N5; N12]; 2xPhospho [T1(3.5); T3(16); T4(76.2); S6(3.5); S7(0.8); S13(91.3); T15(4.3); Y16(0.1); S18(4.3)]	---	0.148781	0.0084421	Yap1	yes-associated protein 1	22601	Yap1	9|9 A1	protein-coding	+3s	23.811	23.5181	23.0364	21.8728	23.3956	23.3564	21.6884	19.8339	20.3322	22.7073
94	55	Q8C8R3_TPEDISTPPEGTKPCLQTPVTSERGSPIVQEPEEASEPK_1xCarbamidomethyl [C15]; 2xPhospho [S36(88.7); S/T]_1xCarbamidomethyl [C15]; 2xPhospho [T1(2.4); S6(9.2); T7(9.3); T12(19.5); T18(9.1); T21(9.1); S22(42.5); S26(10.2); S36(88.7)]	Q8C8R3	Ank2	5	5	21.3209	20.3551	20.838	0.0743766	1.95307	1.95307	6Mo-KO_1Way up vs WT	-1.08673	4.14531	0.96574	Q8C8R3	TPEDISTPPEGTKPCLQTPVTSERGSPIVQEPEEASEPK	1xCarbamidomethyl [C15]; 2xPhospho [S36(88.7); S/T]	1xCarbamidomethyl [C15]; 2xPhospho [T1(2.4); S6(9.2); T7(9.3); T12(19.5); T18(9.1); T21(9.1); S22(42.5); S26(10.2); S36(88.7)]	NP_001029340	0.075975	0.00360171	Ank2	ankyrin 2, brain	109676	Ank2	3 G2|3 56.07 cM	protein-coding	+2s	21.5074	21.8432	21.6299	19.9421	21.6818	20.1894	19.5793	21.502	20.3819	20.1231
488	56	Q3UMU9_GGSSGEELEDEEPVK_2xPhospho [S3(100); S4(100)]_2xPhospho [S3(100); S4(100)]	Q3UMU9	Hdgfl2	5	5	19.1926	20.8875	20.0401	0.0745934	0.308885	-3.23745	6Mo-KO_1Way down vs WT	-12.1431	1.15857	-1.69486	Q3UMU9	GGSSGEELEDEEPVK	2xPhospho [S3(100); S4(100)]	2xPhospho [S3(100); S4(100)]	NP_001291713	0.000885619	0.000420153	Hdgfl2	HDGF like 2	15193	Hdgfl2	17|17 D	protein-coding	-3s	19.7598	17.324	20.258	17.9987	20.6226	20.8529	21.7657	20.1563	19.4262	22.2363
1021	57	E9PUK6_KETESEAEDDNLDDLER_1xPhospho [S5(97)]_1xPhospho [T3(3); S5(97)]	E9PUK6	Srrm1	5	5	22.3854	21.1284	21.7569	0.0764118	2.39005	2.39005	6Mo-KO_1Way up vs WT	-1.12372	6.41905	1.25704	E9PUK6	KETESEAEDDNLDDLER	1xPhospho [S5(97)]	1xPhospho [T3(3); S5(97)]	NP_058079	0.068239	0.00288454	Srrm1	serine/arginine repetitive matrix 1	51796	Srrm1	4|4 D3	protein-coding	+2s	22.676	22.6212	22.8719	22.6483	21.1096	21.0658	21.6314	22.4428	19.2403	21.2615
671	58	Q3UIZ8_RSSNNGGMSAEEEIGSGAEPMR_1xDeamidated [N]; 2xPhospho [S3(82.1); S9(99.9)]_1xDeamidated [N4; N5]; 2xPhospho [S2(17.9); S3(82.1); S9(99.9); S16(0)]	Q3UIZ8	Mylk3	5	5	21.3735	22.3641	21.8688	0.0788758	0.503275	-1.98698	6Mo-KO_1Way down vs WT	-4.36259	1.10498	-0.99058	Q3UIZ8	RSSNNGGMSAEEEIGSGAEPMR	1xDeamidated [N]; 2xPhospho [S3(82.1); S9(99.9)]	1xDeamidated [N4; N5]; 2xPhospho [S2(17.9); S3(82.1); S9(99.9); S16(0)]	NP_001284541	0.0330836	0.00203657	Mylk3	myosin light chain kinase 3	213435	Mylk3	8|8 C3	protein-coding	-2s	21.2996	21.7638	22.1603	20.5413	21.1025	22.5883	23.673	21.5198	21.4787	22.5606
164	59	Q8CCN5_CSPVPGLSSSPSGSPLHGK_1xCarbamidomethyl [C1]; 2xPhospho [S2(100); S10(83.3)]_1xCarbamidomethyl [C1]; 2xPhospho [S2(100); S8(0.4); S9(2.4); S10(83.3); S12(13.8); S14(0)]	Q8CCN5	Bcas3	5	5	20.33	20.7508	20.5404	0.0794421	0.747031	-1.33863	6Mo-KO_1Way down vs WT	-1.87099	1.04412	-0.42076	Q8CCN5	CSPVPGLSSSPSGSPLHGK	1xCarbamidomethyl [C1]; 2xPhospho [S2(100); S10(83.3)]	1xCarbamidomethyl [C1]; 2xPhospho [S2(100); S8(0.4); S9(2.4); S10(83.3); S12(13.8); S14(0)]	NP_001160114	0.082862	0.00360171	Bcas3	BCAS3 microtubule associated cell migration factor	192197	Bcas3	11|11 C	protein-coding	-1s	20.5659	20.6071	20.3004	19.8108	20.3658	20.9416	20.6888	21.0777	20.8563	20.1894
739	60	P70670_VQGEAVSNIQENTQTPTVQEESEEEEVDETGVEVK_1xDeamidated [Q/N]; 1xPhospho [T/S]_1xDeamidated [N8; Q10; Q19]; 1xPhospho [S7(0); T13(1.1); T15(11.7); T17(41.9); S22(41.9); T30(3.5)]	P70670	Naca	5	5	22.2291	21.1726	21.7008	0.0796426	2.07997	2.07997	6Mo-KO_1Way up vs WT	-1.11526	4.82491	1.05656	P70670	VQGEAVSNIQENTQTPTVQEESEEEEVDETGVEVK	1xDeamidated [Q/N]; 1xPhospho [T/S]	1xDeamidated [N8; Q10; Q19]; 1xPhospho [S7(0); T13(1.1); T15(11.7); T17(41.9); S22(41.9); T30(3.5)]	NP_001106670	0.00263338	0.000420153	Naca	nascent polypeptide-associated complex alpha polypeptide	17938	Naca	10|10 D3	protein-coding	+2s	21.8462	22.5802	21.937	21.8128	22.9694	20.3402	20.5634	21.6077	22.839	20.5125
1245	61	Q8BWB1_SPSPGELQVLSPLSPLSPEPPGAPVSQALQPTSLR_2xPhospho [S11(97.5); S/T]_2xPhospho [S1(25.5); S3(74.5); S11(97.5); S14(1.7); S17(0.7); S26(0); T32(0); S33(0)]	Q8BWB1	Synpo2l	5	5	20.5325	21.7937	21.1631	0.0825997	0.417185	-2.39702	6Mo-KO_1Way down vs WT	-6.62329	1.15274	-1.26124	Q8BWB1	SPSPGELQVLSPLSPLSPEPPGAPVSQALQPTSLR	2xPhospho [S11(97.5); S/T]	2xPhospho [S1(25.5); S3(74.5); S11(97.5); S14(1.7); S17(0.7); S26(0); T32(0); S33(0)]	NP_001297361	0.000737617	0.000420153	Synpo2l	synaptopodin 2-like	68760	Synpo2l	14|14 A3	protein-coding	-2s	21.7713	21.2251	19.4904	20.9691	19.2065	21.8078	23.2251	21.4432	20.8816	21.6109
871	62	A0A0U1RPA0_TVPLFPHPSVPSLSPTESKPALQPSPPTSPVR_2xPhospho [S25(99.2); T28(82.7)]_2xPhospho [T1(0); S9(0); S12(0); S14(0); T16(0); S18(0); S25(99.2); T28(82.7); S29(18.1)]	A0A0U1RPA0	---	5	5	27.3304	26.9165	27.1234	0.0826296	1.33225	1.33225	6Mo-KO_1Way up vs WT	-1.04779	1.8597	0.41386	A0A0U1RPA0	TVPLFPHPSVPSLSPTESKPALQPSPPTSPVR	2xPhospho [S25(99.2); T28(82.7)]	2xPhospho [T1(0); S9(0); S12(0); S14(0); T16(0); S18(0); S25(99.2); T28(82.7); S29(18.1)]	---	0.00158754	0.000420153	Plekha7	pleckstrin homology domain containing, family A member 7	233765	Plekha7	7|7 F1	protein-coding	+1s	27.0951	27.4624	27.0791	27.6458	27.3694	26.7003	27.3498	26.6018	27.3498	26.5808
1332	63	A2ASS6_SPTPPSIAAK_1xPhospho [S1(99.9)]_1xPhospho [S1(99.9); T3(0.1); S6(0)]	A2ASS6	---	5	5	25.9335	25.3987	25.6661	0.0843414	1.44874	1.44874	6Mo-KO_1Way up vs WT	-1.06526	2.23583	0.5348	A2ASS6	SPTPPSIAAK	1xPhospho [S1(99.9)]	1xPhospho [S1(99.9); T3(0.1); S6(0)]	---	0.000131645	0.000420153	Ttn	titin	22138	Ttn	2 C3|2 45.13 cM	protein-coding	+1s	25.2949	25.7657	25.6668	26.2926	26.6476	25.1188	25.6841	25.1543	25.718	25.3184
5	64	P58871_LDSPPPSPITEASEAAEAAEADSWAVSGR_2xPhospho [S3(99.2); T/S]_2xPhospho [S3(99.2); S7(21.4); T10(73.1); S13(6.3); S23(0); S27(0)]	P58871	Tnks1bp1	5	5	20.1932	18.4283	19.3107	0.0844147	3.3986	3.3986	6Mo-KO_1Way up vs WT	-1.23251	14.2361	1.76494	P58871	LDSPPPSPITEASEAAEAAEADSWAVSGR	2xPhospho [S3(99.2); T/S]	2xPhospho [S3(99.2); S7(21.4); T10(73.1); S13(6.3); S23(0); S27(0)]	NP_001074729	0.00232047	0.000420153	Tnks1bp1	tankyrase 1 binding protein 1	228140	Tnks1bp1	2|2 D	protein-coding	+3s	20.3911	20.1462	18.424	19.8586	22.1461	20.0674	16.5906	19.7223	18.4401	17.3209
84	65	D3YUT2_AEERESPTVSPR_2xPhospho [S6(96.4); T8(96.4)]_2xPhospho [S6(96.4); T8(96.4); S10(7.3)]	D3YUT2	Alpk3	5	5	18.7684	20.0147	19.3915	0.0865732	0.421516	-2.37239	6Mo-KO_1Way down vs WT	-6.57897	1.16892	-1.24634	D3YUT2	AEERESPTVSPR	2xPhospho [S6(96.4); T8(96.4)]	2xPhospho [S6(96.4); T8(96.4); S10(7.3)]	NP_473426	0.0705726	0.00310401	Alpk3	alpha-kinase 3	116904	Alpk3	7|7 D3	protein-coding	-2s	18.3235	19.4617	19.395	17.2324	19.4293	20.5589	20.5219	20.8614	18.2894	19.842
457	66	Q9Z1E4_SNSVDTGPSSSLSTPTEPLSPTSSLGEERN_2xPhospho [S20(83.5); S/T]_2xPhospho [S1(49.5); S3(49.5); T6(0.7); S9(0.5); S10(0.5); S11(1); S13(1); T14(1.1); T16(1); S20(83.5); T22(8.2); S23(2.8); S24(1)]	Q9Z1E4	Gys1	5	5	22.652	21.469	22.0605	0.0878069	2.27045	2.27045	6Mo-KO_1Way up vs WT	-1.16499	6.00546	1.18298	Q9Z1E4	SNSVDTGPSSSLSTPTEPLSPTSSLGEERN	2xPhospho [S20(83.5); S/T]	2xPhospho [S1(49.5); S3(49.5); T6(0.7); S9(0.5); S10(0.5); S11(1); S13(1); T14(1.1); T16(1); S20(83.5); T22(8.2); S23(2.8); S24(1)]	NP_109603	0.000791364	0.000420153	Gys1	glycogen synthase 1, muscle	14936	Gys1	7 B3|7 29.31 cM	protein-coding	+2s	21.9949	23.146	21.8593	22.3689	23.8908	22.8231	20.3486	22.1279	20.4907	21.5547
1246	67	Q8BWB1_SPSPGELQVLSPLSPLSPEPPGAPVSQALQPTSLR_1xDeamidated [Q]; 2xPhospho [S11(85.3); S/T]_1xDeamidated [Q8; Q27; Q30]; 2xPhospho [S1(50); S3(50); S11(85.3); S14(7.3); S17(7.3); S26(0); T32(0); S33(0)]	Q8BWB1	Synpo2l	5	5	19.8962	20.9397	20.418	0.088407	0.485156	-2.06119	6Mo-KO_1Way down vs WT	-4.87063	1.14643	-1.04348	Q8BWB1	SPSPGELQVLSPLSPLSPEPPGAPVSQALQPTSLR	1xDeamidated [Q]; 2xPhospho [S11(85.3); S/T]	1xDeamidated [Q8; Q27; Q30]; 2xPhospho [S1(50); S3(50); S11(85.3); S14(7.3); S17(7.3); S26(0); T32(0); S33(0)]	NP_001297361	0.000737617	0.000420153	Synpo2l	synaptopodin 2-like	68760	Synpo2l	14|14 A3	protein-coding	-2s	19.5894	19.3678	20.8103	19.4183	20.2951	21.1727	22.1416	21.5586	19.5956	20.2298
1392	68	A2ASS6_SRSPTPPSIAAK_1xPhospho [S3(99.3)]_1xPhospho [S1(0.7); S3(99.3); T5(0); S8(0)]	A2ASS6	---	5	5	26.265	25.728	25.9965	0.091301	1.45097	1.45097	6Mo-KO_1Way up vs WT	-1.07804	2.26962	0.53702	A2ASS6	SRSPTPPSIAAK	1xPhospho [S3(99.3)]	1xPhospho [S1(0.7); S3(99.3); T5(0); S8(0)]	---	0.00421617	0.000644898	Ttn	titin	22138	Ttn	2 C3|2 45.13 cM	protein-coding	+1s	25.558	26.2255	26.1054	26.6943	26.7417	25.216	25.8422	25.7896	26.2787	25.5133
612	69	O55022_EGEEPTVYSDDEEPKDETAR_1xPhospho [S9(87.9)]_1xPhospho [T6(12.1); Y8(0); S9(87.9); T18(0)]	O55022	Pgrmc1	5	5	22.9113	21.859	22.3851	0.0939495	2.07383	2.07383	6Mo-KO_1Way up vs WT	-1.1686	5.02588	1.0523	O55022	EGEEPTVYSDDEEPKDETAR	1xPhospho [S9(87.9)]	1xPhospho [T6(12.1); Y8(0); S9(87.9); T18(0)]	NP_058063	0.000289439	0.000420153	Pgrmc1	progesterone receptor membrane component 1	53328	Pgrmc1	X|X A3.3	protein-coding	+2s	22.5802	22.8401	22.9173	22.2698	23.9493	22.206	20.0945	22.0877	22.9718	21.9352
1441	70	Q8C6M1_SSSRPCSPVHHHHEGHSK_1xCarbamidomethyl [C6]; 2xPhospho [S7(99.9); S17(99.9)]_1xCarbamidomethyl [C6]; 2xPhospho [S1(0.1); S2(0.1); S3(0.1); S7(99.9); S17(99.9)]	Q8C6M1	Usp20	5	5	20.3188	21.5766	20.9477	0.0942467	0.418181	-2.39131	6Mo-KO_1Way down vs WT	-6.89678	1.20608	-1.2578	Q8C6M1	SSSRPCSPVHHHHEGHSK	1xCarbamidomethyl [C6]; 2xPhospho [S7(99.9); S17(99.9)]	1xCarbamidomethyl [C6]; 2xPhospho [S1(0.1); S2(0.1); S3(0.1); S7(99.9); S17(99.9)]	NP_083122	0.0193952	0.00109972	Usp20	ubiquitin specific peptidase 20	74270	Usp20	2|2 B	protein-coding	-2s	21.0619	19.2948	20.562	20.1746	20.5008	20.7516	23.1323	20.9121	20.2161	22.871
91	71	A0A1D5RLB2_SSPCLDR_1xCarbamidomethyl [C4]; 1xPhospho [S2(98.2)]_1xCarbamidomethyl [C4]; 1xPhospho [S1(1.8); S2(98.2)]	A0A1D5RLB2	---	5	5	17.3124	20.6521	18.9823	0.0957052	0.0987784	-10.1237	6Mo-KO_1Way down vs WT	-171.077	1.66923	-3.33966	A0A1D5RLB2	SSPCLDR	1xCarbamidomethyl [C4]; 1xPhospho [S2(98.2)]	1xCarbamidomethyl [C4]; 1xPhospho [S1(1.8); S2(98.2)]	---	0.0673262	0.00288454	Ank2	ankyrin 2, brain	109676	Ank2	3 G2|3 56.07 cM	protein-coding	-6s	16.5951	17.4168	15.9805	20.881	15.6888	21.7892	14.7707	21.2286	22.7172	22.7548
622	72	A0A0G2JFH2_KEIASPPCVEKLSDDGNVAHK_1xCarbamidomethyl [C8]; 2xPhospho [S5(100); S13(100)]_1xCarbamidomethyl [C8]; 2xPhospho [S5(100); S13(100)]	A0A0G2JFH2	---	5	5	21.1864	21.631	21.4087	0.0964039	0.734798	-1.36092	6Mo-KO_1Way down vs WT	-1.9847	1.0716	-0.44458	A0A0G2JFH2	KEIASPPCVEKLSDDGNVAHK	1xCarbamidomethyl [C8]; 2xPhospho [S5(100); S13(100)]	1xCarbamidomethyl [C8]; 2xPhospho [S5(100); S13(100)]	---	0.00749521	0.000644898	Map4	microtubule-associated protein 4	17758	Map4	9 F2|9 59.83 cM	protein-coding	-1s	21.4439	21.13	21.4303	21.3709	20.5571	22.0423	21.3294	21.7795	21.1556	21.8483
72	73	D3Z166_QNYFNTIK_1xDeamidated [Q/N]; 1xPhospho [T6(100)]_1xDeamidated [Q1; N2]; 1xPhospho [Y3(0); T6(100)]	D3Z166	---	5	5	22.4416	23.436	22.9388	0.09871	0.501924	-1.99233	6Mo-KO_1Way down vs WT	-4.66572	1.17542	-0.99446	D3Z166	QNYFNTIK	1xDeamidated [Q/N]; 1xPhospho [T6(100)]	1xDeamidated [Q1; N2]; 1xPhospho [Y3(0); T6(100)]	---	0.0909314	0.00378567	Mgat4a	mannoside acetylglucosaminyltransferase 4, isoenzyme A	269181	Mgat4a	1|1 B	protein-coding	-2s	22.4127	22.2766	22.2326	22.676	22.6099	23.1204	23.4538	22.5254	22.6521	25.4284
1479	74	A0A1B0GRU3_TGTGSPFAGNSPAR_2xPhospho [S5(100); S11(100)]_2xPhospho [T1(0); T3(0); S5(100); S11(100)]	A0A1B0GRU3	---	5	5	21.7415	23.0483	22.3949	0.0991841	0.404216	-2.47392	6Mo-KO_1Way down vs WT	-7.58271	1.23895	-1.3068	A0A1B0GRU3	TGTGSPFAGNSPAR	2xPhospho [S5(100); S11(100)]	2xPhospho [T1(0); T3(0); S5(100); S11(100)]	---	0.037198	0.00237867	Zc3h4	zinc finger CCCH-type containing 4	330474	Zc3h4	7 A2|7 9.03 cM	protein-coding	-2s	22.6986	22.732	22.2623	21.245	19.7694	23.735	24.1718	23.1053	21.9803	22.2489
1226	75	Q8BWB1_VTDEGSVRSPSPGELQVLSPLSPLSPEPPGAPVSQALQPTSLR_2xPhospho [T2(96.4); S/T]_2xPhospho [T2(96.4); S6(28.2); S9(73.7); S11(1.5); S19(0.1); S22(0.1); S25(0); S34(0); T40(0); S41(0)]	Q8BWB1	Synpo2l	5	5	20.1983	21.7277	20.963	0.0992053	0.346436	-2.88654	6Mo-KO_1Way down vs WT	-10.7077	1.28511	-1.52934	Q8BWB1	VTDEGSVRSPSPGELQVLSPLSPLSPEPPGAPVSQALQPTSLR	2xPhospho [T2(96.4); S/T]	2xPhospho [T2(96.4); S6(28.2); S9(73.7); S11(1.5); S19(0.1); S22(0.1); S25(0); S34(0); T40(0); S41(0)]	NP_001297361	0.0418104	0.00237867	Synpo2l	synaptopodin 2-like	68760	Synpo2l	14|14 A3	protein-coding	-3s	22.5887	19.6106	20.5995	18.9481	19.2448	22.3262	21.5474	21.5547	20.1372	23.0729
472	76	H7BX84_TQESCGIAPLTPSQSPKPEAR_1xCarbamidomethyl [C5]; 2xPhospho [T11(100); S15(99.7)]_1xCarbamidomethyl [C5]; 2xPhospho [T1(0); S4(0); T11(100); S13(0.3); S15(99.7)]	H7BX84	---	5	5	26.2793	26.131	26.2051	0.100031	1.10825	1.10825	6Mo-KO_1Way up vs WT	-1.025	1.25891	0.14828	H7BX84	TQESCGIAPLTPSQSPKPEAR	1xCarbamidomethyl [C5]; 2xPhospho [T11(100); S15(99.7)]	1xCarbamidomethyl [C5]; 2xPhospho [T1(0); S4(0); T11(100); S13(0.3); S15(99.7)]	---	0.0584171	0.00274627	Hspa12b	heat shock protein 12B	72630	Hspa12b	2|2 F1	protein-coding	+0.5s	26.4721	26.16	26.1477	26.2722	26.3445	26.1712	26.003	26.2637	26.0149	26.2023
844	77	Q80X80_SDISERPSVDDVESETGSTGALETR_2xPhospho [S14(98.6); S18(82.2)]_2xPhospho [S1(0); S4(0.2); S8(0.2); S14(98.6); T16(1.8); S18(82.2); T19(16.9); T24(0.2)]	Q80X80	C2cd2l	5	5	19.2101	20.3815	19.7958	0.100812	0.443996	-2.25227	6Mo-KO_1Way down vs WT	-6.18219	1.21871	-1.17138	Q80X80	SDISERPSVDDVESETGSTGALETR	2xPhospho [S14(98.6); S18(82.2)]	2xPhospho [S1(0); S4(0.2); S8(0.2); S14(98.6); T16(1.8); S18(82.2); T19(16.9); T24(0.2)]	NP_082185	0.037455	0.00237867	C2cd2l	C2 calcium-dependent domain containing 2-like	71764	C2cd2l	9|9 A5.2	protein-coding	-2s	18.0396	19.7068	20.0119	18.3235	19.9686	21.1841	21.4649	19.3921	19.1711	20.6951
269	78	Q63918_FQHPNTDMLQEKPSSPSPMPSSTPSPSLNLGSTEEAIR_2xPhospho [T23(82.2); S27(91.2)]_2xPhospho [T6(0); S14(2.7); S15(0.3); S17(0.1); S21(0.9); S22(7.7); T23(82.2); S25(14.4); S27(91.2); S32(0.3); T33(0.1)]	Q63918	Cavin2	5	5	24.0953	24.8896	24.4925	0.102066	0.576631	-1.73421	6Mo-KO_1Way down vs WT	-3.44945	1.14695	-0.79428	Q63918	FQHPNTDMLQEKPSSPSPMPSSTPSPSLNLGSTEEAIR	2xPhospho [T23(82.2); S27(91.2)]	2xPhospho [T6(0); S14(2.7); S15(0.3); S17(0.1); S21(0.9); S22(7.7); T23(82.2); S25(14.4); S27(91.2); S32(0.3); T33(0.1)]	NP_620080	0.0531159	0.00252693	Cavin2	caveolae associated 2	20324	Cavin2	1|1 C1.1	protein-coding	-2s	25.0711	25.1301	23.4919	23.6929	23.0906	25.1815	24.7461	24.7692	24.982	24.7692
357	79	Q8C0E3_GLGSNEDGLQK_1xPhospho [S4(100)]_1xPhospho [S4(100)]	Q8C0E3	Trim47	5	5	20.6228	20.244	20.4334	0.102322	1.30026	1.30026	6Mo-KO_1Way up vs WT	-1.06788	1.80545	0.3788	Q8C0E3	GLGSNEDGLQK	1xPhospho [S4(100)]	1xPhospho [S4(100)]	NP_766158	0.149722	0.00880964	Trim47	tripartite motif-containing 47	217333	Trim47	11|11 E2	protein-coding	+1s	20.3586	20.5043	20.3733	21.1843	20.6933	20.2553	20.0792	19.8643	20.6888	20.3322
751	80	A0A0G2JEX1_TVSQESLTPGKLEINFEQLLR_2xPhospho [S3(97.3); T8(86.1)]_2xPhospho [T1(2.7); S3(97.3); S6(14); T8(86.1)]	A0A0G2JEX1	---	5	5	19.807	21.2623	20.5346	0.104489	0.364694	-2.74202	6Mo-KO_1Way down vs WT	-9.76812	1.29918	-1.45524	A0A0G2JEX1	TVSQESLTPGKLEINFEQLLR	2xPhospho [S3(97.3); T8(86.1)]	2xPhospho [T1(2.7); S3(97.3); S6(14); T8(86.1)]	---	0.00642379	0.000644898	Nexn	nexilin	68810	Nexn	3|3 H3	protein-coding	-2s	21.3709	20.4464	19.9686	19.1125	18.1368	22.5656	22.4514	21.2033	20.4955	19.5956
706	81	Q02566; Q91Z83; P13542_ANSEVAQWR_1xPhospho [S3(100)]_1xPhospho [S3(100)]	Q02566; Q91Z83; P13542	---	5	5	20.2948	18.9442	19.6195	0.105936	2.55025	2.55025	6Mo-KO_1Way up vs WT	-1.2824	8.34044	1.35064	Q02566; Q91Z83; P13542	ANSEVAQWR	1xPhospho [S3(100)]	1xPhospho [S3(100)]	---	0.0182167	0.00109972	Myh6	myosin, heavy polypeptide 6, cardiac muscle, alpha	17888	Myh6	14 C3|14 28.01 cM	protein-coding	+2s	19.9911	21.134	19.6849	19.9187	20.7455	16.8131	20.0156	20.1802	19.9156	17.7965
10	82	Q3UHX2_KSLDSDESEDEDDDYQQK_2xPhospho [S5(96); S8(100)]_2xPhospho [S2(4); S5(96); S8(100); Y15(0)]	Q3UHX2	Pdap1	5	5	19.367	20.7349	20.051	0.10661	0.387439	-2.58105	6Mo-KO_1Way down vs WT	-8.59389	1.29002	-1.36796	Q3UHX2	KSLDSDESEDEDDDYQQK	2xPhospho [S5(96); S8(100)]	2xPhospho [S2(4); S5(96); S8(100); Y15(0)]	NP_001028485	0.0879687	0.00360171	Pdap1	PDGFA associated protein 1	231887	Pdap1	5|5 G2	protein-coding	-2s	19.0224	19.4183	18.9917	17.9155	21.4869	19.5144	21.7453	20.1132	20.3698	21.9319
1223	83	Q8BWB1_TPPPMAPKTPPPTTPKTPPPVAPKPGSR_2xPhospho [T9(98.4); S27(100)]_2xPhospho [T1(1.4); T9(98.4); T13(0.1); T14(0.1); T17(0); S27(100)]	Q8BWB1	Synpo2l	5	5	22.2413	20.8254	21.5333	0.107734	2.66826	2.66826	6Mo-KO_1Way up vs WT	-1.30773	9.31053	1.4159	Q8BWB1	TPPPMAPKTPPPTTPKTPPPVAPKPGSR	2xPhospho [T9(98.4); S27(100)]	2xPhospho [T1(1.4); T9(98.4); T13(0.1); T14(0.1); T17(0); S27(100)]	NP_001297361	0.0179646	0.00109972	Synpo2l	synaptopodin 2-like	68760	Synpo2l	14|14 A3	protein-coding	+2s	22.2623	22.4573	20.1334	22.4127	23.9408	21.8312	21.6408	21.2715	20.1231	19.2604
937	84	Q60953_VPAPPGSPCR_1xCarbamidomethyl [C9]; 1xPhospho [S7(100)]_1xCarbamidomethyl [C9]; 1xPhospho [S7(100)]	Q60953	Pml	5	5	21.8098	21.3555	21.5827	0.107906	1.37012	1.37012	6Mo-KO_1Way up vs WT	-1.09015	2.04645	0.4543	Q60953	VPAPPGSPCR	1xCarbamidomethyl [C9]; 1xPhospho [S7(100)]	1xCarbamidomethyl [C9]; 1xPhospho [S7(100)]	NP_001298017	0.0028053	0.000420153	Pml	promyelocytic leukemia	18854	Pml	9 B|9 31.63 cM	protein-coding	+1s	21.6027	21.7392	21.717	22.273	21.717	21.0817	21.1966	21.0868	22.2363	21.176
1075	85	Q542V3_SRSTSKSKPNVPAESR_2xPhospho [S3(94.5); T4(85)]_2xPhospho [S1(3.4); S3(94.5); T4(85); S5(16.6); S7(0.6); S15(0)]	Q542V3	Srsf4	5	5	21.3718	22.1049	21.7384	0.108102	0.60161	-1.66221	6Mo-KO_1Way down vs WT	-3.1772	1.14994	-0.7331	Q542V3	SRSTSKSKPNVPAESR	2xPhospho [S3(94.5); T4(85)]	2xPhospho [S1(3.4); S3(94.5); T4(85); S5(16.6); S7(0.6); S15(0)]	NP_065612	0.107889	0.00449347	Srsf4	serine and arginine-rich splicing factor 4	57317	Srsf4	4|4 D2.3	protein-coding	-1s	22.2826	21.1728	22.0586	21.1188	20.2264	22.2333	22.1179	22.3611	22.3576	21.4548
1299	86	Q8VBT0_KVEEEQEADEEDVSEEEAEDREGASK_1xPhospho [S14(100)]_1xPhospho [S14(100); S25(0)]	Q8VBT0	Tmx1	5	5	22.4193	21.5484	21.9839	0.10833	1.8288	1.8288	6Mo-KO_1Way up vs WT	-1.18123	3.95065	0.8709	Q8VBT0	KVEEEQEADEEDVSEEEAEDREGASK	1xPhospho [S14(100)]	1xPhospho [S14(100); S25(0)]	NP_082615	0.00078031	0.000420153	Tmx1	thioredoxin-related transmembrane protein 1	72736	Tmx1	12|12 C2	protein-coding	+2s	22.0671	22.3689	22.732	21.4869	23.4417	21.9228	20.163	21.6799	21.8446	22.1318
463	87	Q6DFZ1_AQSASVESIPEVLEECTSPADHSDSASVHDMDYVNPR_1xCarbamidomethyl [C16]; 1xDeamidated [N35]; 2xPhospho [S3(99.7); S5(97.4)]_1xCarbamidomethyl [C16]; 1xDeamidated [N35]; 2xPhospho [S3(99.7); S5(97.4); S8(2.8); T17(0); S18(0); S23(0); S25(0); S27(0); Y33(0)]	Q6DFZ1	Gbf1	5	5	21.7545	20.6595	21.207	0.108815	2.13607	2.13607	6Mo-KO_1Way up vs WT	-1.23488	5.63451	1.09496	Q6DFZ1	AQSASVESIPEVLEECTSPADHSDSASVHDMDYVNPR	1xCarbamidomethyl [C16]; 1xDeamidated [N35]; 2xPhospho [S3(99.7); S5(97.4)]	1xCarbamidomethyl [C16]; 1xDeamidated [N35]; 2xPhospho [S3(99.7); S5(97.4); S8(2.8); T17(0); S18(0); S23(0); S25(0); S27(0); Y33(0)]	NP_849261	0.0915351	0.00378567	Gbf1	golgi-specific brefeldin A-resistance factor 1	107338	Gbf1	19|19 C3	protein-coding	+2s	21.4222	21.543	21.5976	21.3818	22.8278	20.6592	18.6368	21.1891	20.9552	21.8573
1172	88	Q5U4C3_VAPPPPALTPDSQTVDSSCKTPEVSFLPEEASEDTGVR_1xCarbamidomethyl [C19]; 2xPhospho [T9(83.4); T21(83.2)]_1xCarbamidomethyl [C19]; 2xPhospho [T9(83.4); S12(4.2); T14(9.5); S17(4.2); S18(6.1); T21(83.2); S25(9.4); S32(0.1); T35(0)]	Q5U4C3	Scaf1	5	5	21.4457	20.1412	20.7934	0.109244	2.47008	2.47008	6Mo-KO_1Way up vs WT	-1.2879	7.85787	1.30456	Q5U4C3	VAPPPPALTPDSQTVDSSCKTPEVSFLPEEASEDTGVR	1xCarbamidomethyl [C19]; 2xPhospho [T9(83.4); T21(83.2)]	1xCarbamidomethyl [C19]; 2xPhospho [T9(83.4); S12(4.2); T14(9.5); S17(4.2); S18(6.1); T21(83.2); S25(9.4); S32(0.1); T35(0)]	NP_001008422	0.035203	0.00227803	Scaf1	SR-related CTD-associated factor 1	233208	Scaf1	7|7 B3	protein-coding	+2s	20.5102	21.7713	21.8728	20.3246	22.7497	19.8257	18.4219	19.7655	20.9847	21.708
100	89	Q3UHJ0_VGSLTPPSSPK_2xPhospho [S8(100); S9(100)]_2xPhospho [S3(0); T5(0); S8(100); S9(100)]	Q3UHJ0	Aak1	5	5	27.3264	27.1576	27.242	0.109712	1.12409	1.12409	6Mo-KO_1Way up vs WT	-1.03351	1.30593	0.16876	Q3UHJ0	VGSLTPPSSPK	2xPhospho [S8(100); S9(100)]	2xPhospho [S3(0); T5(0); S8(100); S9(100)]	NP_001035195	0.00471742	0.000644898	Aak1	AP2 associated kinase 1	269774	Aak1	6 D1|6 37.75 cM	protein-coding	+0.5s	27.4037	27.3868	27.2774	27.3454	27.2187	27.3895	27.2812	26.9492	27.204	26.9643
1096	90	Q8R3P9_LCLQGPTSTCTEPLSLQK_2xCarbamidomethyl [C2; C10]; 2xDeamidated [Q4; Q17]; 2xPhospho [S15(99.9); S/T]_2xCarbamidomethyl [C2; C10]; 2xDeamidated [Q4; Q17]; 2xPhospho [T7(10.4); S8(44.5); T9(44.5); T11(0.8); S15(99.9)]	Q8R3P9	Slf1	5	5	22.3921	21.2906	21.8413	0.110026	2.14584	2.14584	6Mo-KO_1Way up vs WT	-1.24132	5.71578	1.10154	Q8R3P9	LCLQGPTSTCTEPLSLQK	2xCarbamidomethyl [C2; C10]; 2xDeamidated [Q4; Q17]; 2xPhospho [S15(99.9); S/T]	2xCarbamidomethyl [C2; C10]; 2xDeamidated [Q4; Q17]; 2xPhospho [T7(10.4); S8(44.5); T9(44.5); T11(0.8); S15(99.9)]	NP_598832	0.0710483	0.00329599	Slf1	SMC5-SMC6 complex localization factor 1	105377	Slf1	13|13 C1	protein-coding	+2s	22.5372	22.3028	22.9205	22.0207	22.1793	21.0076	22.1039	19.1291	22.4792	21.733
529	91	Q9ET78_TSLSSLRSEHSNGTVAPDSPAADGPMLPSPPVPR_1xOxidation [M26]; 2xPhospho [S/T]_1xOxidation [M26]; 2xPhospho [T1(36.8); S2(61.5); S4(62.1); S5(37.5); S8(1.8); S11(0.3); T14(0.1); S19(0); S29(0)]	Q9ET78	Jph2	5	5	20.9007	21.7332	21.3169	0.1107	0.561579	-1.78069	6Mo-KO_1Way down vs WT	-3.73975	1.17941	-0.83244	Q9ET78	TSLSSLRSEHSNGTVAPDSPAADGPMLPSPPVPR	1xOxidation [M26]; 2xPhospho [S/T]	1xOxidation [M26]; 2xPhospho [T1(36.8); S2(61.5); S4(62.1); S5(37.5); S8(1.8); S11(0.3); T14(0.1); S19(0); S29(0)]	NP_001192005	0.000241063	0.000420153	Jph2	junctophilin 2	59091	Jph2	2|2 H3	protein-coding	-2s	21.2684	20.562	20.901	21.1728	20.5995	21.9527	20.6702	21.5384	21.2178	23.2868
1450	92	Q99PL6_GKSPQLALR_1xPhospho [S3(100)]_1xPhospho [S3(100)]	Q99PL6	Ubxn6	5	5	21.7296	21.3328	21.5312	0.113651	1.3166	1.3166	6Mo-KO_1Way up vs WT	-1.08556	1.88175	0.39682	Q99PL6	GKSPQLALR	1xPhospho [S3(100)]	1xPhospho [S3(100)]	NP_077752	0.146914	0.00826345	Ubxn6	UBX domain protein 6	66530	Ubxn6	17|17 D	protein-coding	+1s	21.0816	21.6382	21.7347	22.2186	21.9749	21.3325	20.9345	21.6469	21.446	21.304
248	93	Q63918_GNNSAVGSNADLTIEEDEEEEPVALQQAQQVR_2xDeamidated [N/Q]; 1xPhospho [S/T]_2xDeamidated [N2; N9; Q26; Q27; Q29]; 1xPhospho [S4(48.1); S8(48.1); T13(3.9)]	Q63918	Cavin2	5	5	21.6608	19.752	20.7064	0.114483	3.75481	3.75481	6Mo-KO_1Way up vs WT	-1.49111	21.0226	1.90874	Q63918	GNNSAVGSNADLTIEEDEEEEPVALQQAQQVR	2xDeamidated [N/Q]; 1xPhospho [S/T]	2xDeamidated [N2; N9; Q26; Q27; Q29]; 1xPhospho [S4(48.1); S8(48.1); T13(3.9)]	NP_620080	0.000904503	0.000420153	Cavin2	caveolae associated 2	20324	Cavin2	1|1 C1.1	protein-coding	+3s	18.7898	21.8841	21.8928	22.5537	23.1834	20.0098	21.3703	19.3348	17.0424	21.0028
190	94	Q922J3_SPSASSLSSMSSVASSVSSKPSR_2xPhospho [S]_2xPhospho [S1(21.4); S3(21.4); S5(71.3); S6(71.3); S8(4.1); S9(5.9); S11(3.7); S12(0.8); S15(0.1); S16(0.1); S18(0); S19(0); S22(0)]	Q922J3	Clip1	5	5	20.6427	21.6458	21.1442	0.115472	0.49892	-2.00433	6Mo-KO_1Way down vs WT	-4.97029	1.23721	-1.00312	Q922J3	SPSASSLSSMSSVASSVSSKPSR	2xPhospho [S]	2xPhospho [S1(21.4); S3(21.4); S5(71.3); S6(71.3); S8(4.1); S9(5.9); S11(3.7); S12(0.8); S15(0.1); S16(0.1); S18(0); S19(0); S22(0)]	NP_001278158	0.0034879	0.000420153	Clip1	CAP-GLY domain containing linker protein 1	56430	Clip1	5|5 F	protein-coding	-2s	21.3554	20.6186	21.0467	20.4684	19.7244	21.9	23.2449	21.1061	20.2356	21.7425
982	95	S4R248_ATTPPNQGRPDSPVYANLQELK_2xPhospho [T2(80.6); S12(99.6)]_2xPhospho [T2(80.6); T3(19.8); S12(99.6); Y15(0)]	S4R248	---	5	5	25.3314	25.0552	25.1933	0.115523	1.21102	1.21102	6Mo-KO_1Way up vs WT	-1.06041	1.55516	0.27622	S4R248	ATTPPNQGRPDSPVYANLQELK	2xPhospho [T2(80.6); S12(99.6)]	2xPhospho [T2(80.6); T3(19.8); S12(99.6); Y15(0)]	---	0.00689045	0.000644898	Arhgap12	Rho GTPase activating protein 12	75415	Arhgap12	18|18 A1	protein-coding	+0.5s	25.4354	25.0922	25.0353	25.343	25.7511	25.1085	25.0894	25.3272	24.9622	24.7886
624	96	P14873_SPDTSAYCYETMEK_1xCarbamidomethyl [C8]; 1xPhospho [S1(99.7)]_1xCarbamidomethyl [C8]; 1xPhospho [S1(99.7); T4(0.3); S5(0); Y7(0); Y9(0); T11(0)]	P14873	Map1b	5	5	20.3023	21.8906	21.0965	0.115824	0.332582	-3.00678	6Mo-KO_1Way down vs WT	-12.6845	1.40304	-1.58822	P14873	SPDTSAYCYETMEK	1xCarbamidomethyl [C8]; 1xPhospho [S1(99.7)]	1xCarbamidomethyl [C8]; 1xPhospho [S1(99.7); T4(0.3); S5(0); Y7(0); Y9(0); T11(0)]	NP_032660	0.000813943	0.000420153	Map1b	microtubule-associated protein 1B	17755	Map1b	13 D1|13 52.9 cM	protein-coding	-3s	20.1401	19.9266	19.9187	21.333	20.1933	21.4386	19.9749	22.7811	24.7592	20.499
1023	97	E9PUK6_RRSPTPPPR_2xPhospho [S3(100); T5(100)]_2xPhospho [S3(100); T5(100)]	E9PUK6	Srrm1	5	5	19.1791	23.2152	21.1972	0.116881	0.0609555	-16.4054	6Mo-KO_1Way down vs WT	-644.336	2.39408	-4.0361	E9PUK6	RRSPTPPPR	2xPhospho [S3(100); T5(100)]	2xPhospho [S3(100); T5(100)]	NP_058079	0.0545815	0.00252693	Srrm1	serine/arginine repetitive matrix 1	51796	Srrm1	4|4 D3	protein-coding	-6s	18.2223	15.3372	19.1484	20.1854	23.002	15.6863	25.2834	25.7568	23.5597	25.7896
777	98	A0A087WRY3_VVDYSQFQESDDADEDYGR_1xPhospho [S10(97.3)]_1xPhospho [Y4(0); S5(2.7); S10(97.3); Y17(0)]	A0A087WRY3	Nucks1	5	5	21.9883	21.041	21.5146	0.117544	1.92823	1.92823	6Mo-KO_1Way up vs WT	-1.22964	4.5719	0.94728	A0A087WRY3	VVDYSQFQESDDADEDYGR	1xPhospho [S10(97.3)]	1xPhospho [Y4(0); S5(2.7); S10(97.3); Y17(0)]	NP_001139276	0.0044912	0.000644898	Nucks1	nuclear casein kinase and cyclin-dependent kinase substrate 1	98415	Nucks1	1|1 E4	protein-coding	+2s	21.3297	22.065	21.8557	21.4488	23.2422	19.6917	21.8011	20.6988	20.9753	22.0381
504	99	Q5SVQ0_NTADHDESPPRTPTGNAPSSESDIDISSPNVSHDESIAK_1xDeamidated [N]; 2xPhospho [S8(92); T12(85.8)]_1xDeamidated [N16; N30]; 2xPhospho [T2(6.4); S8(92); T12(85.8); T14(12.9); S19(1.1); S20(1.1); S22(0.5); S27(0.1); S28(0.1); S32(0); S36(0)]	Q5SVQ0	Kat7	5	5	19.9022	21.8133	20.8577	0.118744	0.265886	-3.76101	6Mo-KO_1Way down vs WT	-21.6084	1.52762	-1.91112	Q5SVQ0	NTADHDESPPRTPTGNAPSSESDIDISSPNVSHDESIAK	1xDeamidated [N]; 2xPhospho [S8(92); T12(85.8)]	1xDeamidated [N16; N30]; 2xPhospho [T2(6.4); S8(92); T12(85.8); T14(12.9); S19(1.1); S20(1.1); S22(0.5); S27(0.1); S28(0.1); S32(0); S36(0)]	NP_001181933	0.00815282	0.000644898	Kat7	K(lysine) acetyltransferase 7	217127	Kat7	11|11 D	protein-coding	-3s	21.6666	16.9425	18.3235	21.5598	21.0185	21.4693	20.8146	21.2445	21.6956	23.8425
345	100	Q64511_KASGSENEGDYNPGR_2xPhospho [S3(100); S5(100)]_2xPhospho [S3(100); S5(100); Y11(0)]	Q64511	Top2b	5	5	21.6572	20.6211	21.1392	0.119894	2.05071	2.05071	6Mo-KO_1Way up vs WT	-1.26259	5.30969	1.03612	Q64511	KASGSENEGDYNPGR	2xPhospho [S3(100); S5(100)]	2xPhospho [S3(100); S5(100); Y11(0)]	NP_033435	0.011251	0.000644898	Top2b	topoisomerase (DNA) II beta	21974	Top2b	14|14 A1	protein-coding	+2s	20.2812	21.5746	21.7468	21.7438	22.9396	20.0156	21.2249	21.6585	19.3348	20.8716
226	101	Q02248_SPQMVSAIVR_1xPhospho [S1(100)]_1xPhospho [S1(100); S6(0)]	Q02248	Ctnnb1	5	5	23.4982	22.9121	23.2051	0.119978	1.5012	1.5012	6Mo-KO_1Way up vs WT	-1.14116	2.57172	0.58612	Q02248	SPQMVSAIVR	1xPhospho [S1(100)]	1xPhospho [S1(100); S6(0)]	NP_001159374	0.107187	0.00429411	Ctnnb1	catenin (cadherin associated protein), beta 1	12387	Ctnnb1	9 F4|9 72.19 cM	protein-coding	+1s	23.3074	23.1184	23.0225	23.7631	24.2795	22.3947	23.5597	22.6016	23.4387	22.5656
104	102	Q9JIX8_EASSPPTHIQLQEEMEPVEGPAPPVLIQLSPPNTDAGAR_1xOxidation [M15]; 2xPhospho [S30(96.4); S/T]_1xOxidation [M15]; 2xPhospho [S3(64.8); S4(26.1); T7(12.5); S30(96.4); T34(0.2)]	Q9JIX8	Acin1	5	5	22.3077	23.3809	22.8443	0.120278	0.475283	-2.10401	6Mo-KO_1Way down vs WT	-5.64278	1.27467	-1.07314	Q9JIX8	EASSPPTHIQLQEEMEPVEGPAPPVLIQLSPPNTDAGAR	1xOxidation [M15]; 2xPhospho [S30(96.4); S/T]	1xOxidation [M15]; 2xPhospho [S3(64.8); S4(26.1); T7(12.5); S30(96.4); T34(0.2)]	NP_001078942	0.0210844	0.00109972	Acin1	apoptotic chromatin condensation inducer 1	56215	Acin1	14|14 C2	protein-coding	-2s	21.8357	23.3254	22.4954	21.9261	21.9561	22.1467	24.3595	22.2878	24.9127	23.1977
235	103	O54724_ATEEPSGTGSDELIKSDQVNGVLVLSLLDK_2xPhospho [T2(97.6); T/S]_2xPhospho [T2(97.6); S6(8.2); T8(73.6); S10(20.6); S16(0.1); S26(0)]	O54724	Cavin1	5	5	20.5434	21.497	21.0202	0.12029	0.516342	-1.9367	6Mo-KO_1Way down vs WT	-4.65369	1.24072	-0.9536	O54724	ATEEPSGTGSDELIKSDQVNGVLVLSLLDK	2xPhospho [T2(97.6); T/S]	2xPhospho [T2(97.6); S6(8.2); T8(73.6); S10(20.6); S16(0.1); S26(0)]	NP_033012	0.00455471	0.000644898	Cavin1	caveolae associated 1	19285	Cavin1	11 D|11 63.95 cM	protein-coding	-2s	21.311	21.1604	20.8077	18.8192	20.6186	22.1498	20.3819	21.9228	21.7859	21.2445
459	104	Q9Z1E4_HSSPHQSEDEEEPRDGPLGEDSERYDEEEEAAK_2xPhospho [S7(100); S/Y]_2xPhospho [S2(50); S3(50); S7(100); S22(0); Y25(0)]	Q9Z1E4	Gys1	5	5	26.9544	27.4171	27.1857	0.123122	0.725617	-1.37814	6Mo-KO_1Way down vs WT	-2.11681	1.11454	-0.46272	Q9Z1E4	HSSPHQSEDEEEPRDGPLGEDSERYDEEEEAAK	2xPhospho [S7(100); S/Y]	2xPhospho [S2(50); S3(50); S7(100); S22(0); Y25(0)]	NP_109603	0.0393033	0.00237867	Gys1	glycogen synthase 1, muscle	14936	Gys1	7 B3|7 29.31 cM	protein-coding	-1s	27.4887	26.5037	26.9455	27.3015	26.5326	28.0667	27.1592	27.2812	27.0493	27.5292
358	105	O70481_EDSIMEEESTSAVSEASR_2xPhospho [S17(100); T/S]_2xPhospho [S3(9.4); S9(9.4); T10(40.3); S11(40.3); S14(0.7); S17(100)]	O70481	Ubr1	5	5	24.1098	26.9865	25.5481	0.125092	0.136153	-7.34468	6Mo-KO_1Way down vs WT	-107.603	1.9947	-2.8767	O70481	EDSIMEEESTSAVSEASR	2xPhospho [S17(100); T/S]	2xPhospho [S3(9.4); S9(9.4); T10(40.3); S11(40.3); S14(0.7); S17(100)]	NP_033487	0.126874	0.00631624	Ubr1	ubiquitin protein ligase E3 component n-recognin 1	22222	Ubr1	2 E5|2 60.37 cM	protein-coding	-6s	24.5499	17.7998	25.7349	25.9749	26.4897	26.9938	27.7186	25.8768	25.9921	28.3514
354	106	P11531_SDSSQPMLLR_1xOxidation [M7]; 1xPhospho [S]_1xOxidation [M7]; 1xPhospho [S1(47.1); S3(47.1); S4(5.9)]	P11531	Dmd	5	5	27.3661	27.197	27.2815	0.125335	1.12434	1.12434	6Mo-KO_1Way up vs WT	-1.04154	1.31666	0.16908	P11531	SDSSQPMLLR	1xOxidation [M7]; 1xPhospho [S]	1xOxidation [M7]; 1xPhospho [S1(47.1); S3(47.1); S4(5.9)]	NP_031894	0.140539	0.00826345	Dmd	dystrophin, muscular dystrophy	13405	Dmd	X C1|X 38.38 cM	protein-coding	+0.5s	27.4379	27.4037	27.3454	27.3868	27.2567	27.442	27.3247	26.9643	27.2603	26.9938
755	107	A0A0G2JEX1_KREDEEEEEGSIVNGSTTEDEEQTR_1xPhospho [S11(100)]_1xPhospho [S11(100); S16(0); T17(0); T18(0); T24(0)]	A0A0G2JEX1	---	5	5	21.7367	20.9145	21.3256	0.127146	1.76812	1.76812	6Mo-KO_1Way up vs WT	-1.2241	3.82685	0.82222	A0A0G2JEX1	KREDEEEEEGSIVNGSTTEDEEQTR	1xPhospho [S11(100)]	1xPhospho [S11(100); S16(0); T17(0); T18(0); T24(0)]	---	0.0261488	0.00132202	Nexn	nexilin	68810	Nexn	3|3 H3	protein-coding	+2s	21.5454	21.4171	21.3513	21.3182	23.0517	20.9847	19.8339	20.7382	22.0405	20.9753
991	108	Q9ES28_KPSDEEFAVR_1xPhospho [S3(100)]_1xPhospho [S3(100)]	Q9ES28	Arhgef7	5	5	20.9625	21.9287	21.4456	0.128583	0.511852	-1.95369	6Mo-KO_1Way down vs WT	-4.85993	1.27327	-0.9662	Q9ES28	KPSDEEFAVR	1xPhospho [S3(100)]	1xPhospho [S3(100)]	NP_001106989	0.0412401	0.00237867	Arhgef7	Rho guanine nucleotide exchange factor (GEF7)	54126	Arhgef7	8|8 A1.1	protein-coding	-2s	20.8304	21.229	20.8167	21.7509	20.1854	20.9305	22.1388	20.9513	21.9137	23.7091
670	109	Q5DTJ9_GPASPKDSPPETK_1xPhospho [S8(100)]_1xPhospho [S4(0); S8(100); T12(0)]	Q5DTJ9	Mypn	5	5	19.8833	20.6997	20.2915	0.130305	0.567865	-1.76098	6Mo-KO_1Way down vs WT	-3.81861	1.23139	-0.81638	Q5DTJ9	GPASPKDSPPETK	1xPhospho [S8(100)]	1xPhospho [S4(0); S8(100); T12(0)]	NP_892037	0.000155856	0.000420153	Mypn	myopalladin	68802	Mypn	10|10 B4	protein-coding	-2s	19.2948	19.4075	20.0446	21.0185	19.6513	20.2921	21.0388	20.5589	21.9057	19.7031
781	110	A0A087WRY3_KVVDYSQFQESDDADEDYGR_1xPhospho [S11(97.6)]_1xPhospho [Y5(0); S6(2.4); S11(97.6); Y18(0)]	A0A087WRY3	Nucks1	5	5	21.3533	20.2294	20.7914	0.130333	2.17926	2.17926	6Mo-KO_1Way up vs WT	-1.33193	6.32556	1.12384	A0A087WRY3	KVVDYSQFQESDDADEDYGR	1xPhospho [S11(97.6)]	1xPhospho [Y5(0); S6(2.4); S11(97.6); Y18(0)]	NP_001139276	0.106488	0.00429411	Nucks1	nuclear casein kinase and cyclin-dependent kinase substrate 1	98415	Nucks1	1|1 E4	protein-coding	+2s	21.1061	20.8677	21.7197	20.0446	23.0283	20.5125	18.4662	20.8314	20.7037	20.6334
849	111	Q9CQ73_RPPGCGSFSDAVFDNGPLKPTMPTHPPGTSHSAGSLLEETTVR_1xCarbamidomethyl [C5]; 2xPhospho [S/T]_1xCarbamidomethyl [C5]; 2xPhospho [S7(71.7); S9(28.3); T21(0); T24(0.1); T29(1.9); S30(1.9); S32(10.9); S35(69.8); T40(4.5); T41(10.9)]	Q9CQ73	Pkp2	5	5	20.4866	22.5487	21.5176	0.130644	0.239464	-4.176	6Mo-KO_1Way down vs WT	-29.5611	1.69512	-2.06212	Q9CQ73	RPPGCGSFSDAVFDNGPLKPTMPTHPPGTSHSAGSLLEETTVR	1xCarbamidomethyl [C5]; 2xPhospho [S/T]	1xCarbamidomethyl [C5]; 2xPhospho [S7(71.7); S9(28.3); T21(0); T24(0.1); T29(1.9); S30(1.9); S32(10.9); S35(69.8); T40(4.5); T41(10.9)]	NP_080439	0.0479495	0.00237867	Pkp2	plakophilin 2	67451	Pkp2	16|16 A2	protein-coding	-3s	21.9158	18.4023	18.4419	19.901	23.7719	24.6438	22.206	21.2648	21.3107	23.3182
287	112	P49586_TSPSSSPASLSR_1xPhospho [S2(90.9)]_1xPhospho [T1(9.1); S2(90.9); S4(0); S5(0); S6(0); S9(0); S11(0)]	P49586	Pcyt1a	5	5	24.7315	24.3797	24.5556	0.13147	1.27613	1.27613	6Mo-KO_1Way up vs WT	-1.09511	1.78341	0.35178	P49586	TSPSSSPASLSR	1xPhospho [S2(90.9)]	1xPhospho [T1(9.1); S2(90.9); S4(0); S5(0); S6(0); S9(0); S11(0)]	NP_001156631	0.00263338	0.000420153	Pcyt1a	phosphate cytidylyltransferase 1, choline, alpha isoform	13026	Pcyt1a	16 B3|16 22.69 cM	protein-coding	+0.5s	24.3709	24.753	24.5085	25.1676	24.8574	24.1308	24.5129	24.3595	24.8956	23.9997
444	113	P23242_SDPYHATTGPLSPSKDCGSPK_1xCarbamidomethyl [C17]; 2xPhospho [T7(83.3); S19(83.9)]_1xCarbamidomethyl [C17]; 2xPhospho [S1(0); Y4(0); T7(83.3); T8(0.7); S12(16); S14(16.1); S19(83.9)]	P23242	Gja1	5	5	23.5971	23.0524	23.3248	0.13161	1.45876	1.45876	6Mo-KO_1Way up vs WT	-1.15133	2.45	0.54474	P23242	SDPYHATTGPLSPSKDCGSPK	1xCarbamidomethyl [C17]; 2xPhospho [T7(83.3); S19(83.9)]	1xCarbamidomethyl [C17]; 2xPhospho [S1(0); Y4(0); T7(83.3); T8(0.7); S12(16); S14(16.1); S19(83.9)]	NP_034418	0.127692	0.00631624	Gja1	gap junction protein, alpha 1	14609	Gja1	10 B4|10 28.64 cM	protein-coding	+1s	23.7021	23.8377	23.7868	23.6721	22.9869	23.8328	22.0711	23.2516	22.9824	23.124
427	114	Q9QYB5_TEEVLSPDGSPSKSPSK_1xPhospho [S/T]_1xPhospho [T1(0); S6(0); S10(0.1); S12(5.1); S14(47.4); S16(47.4)]	Q9QYB5	Add3	5	5	22.1427	21.7031	21.9229	0.133333	1.35623	1.35623	6Mo-KO_1Way up vs WT	-1.12286	2.06533	0.4396	Q9QYB5	TEEVLSPDGSPSKSPSK	1xPhospho [S/T]	1xPhospho [T1(0); S6(0); S10(0.1); S12(5.1); S14(47.4); S16(47.4)]	NP_001157571	0.0385005	0.00237867	Add3	adducin 3 (gamma)	27360	Add3	19 D2|19 47.18 cM	protein-coding	+1s	21.6265	22.1461	22.0671	22.6455	22.2282	21.2064	21.5511	22.0153	22.3342	21.4084
1342	115	A2ASS6_APTPSPVR_2xPhospho [T3(100); S5(100)]_2xPhospho [T3(100); S5(100)]	A2ASS6	---	5	5	25.1093	26.0987	25.604	0.133511	0.503708	-1.98528	6Mo-KO_1Way down vs WT	-5.11819	1.2986	-0.98934	A2ASS6	APTPSPVR	2xPhospho [T3(100); S5(100)]	2xPhospho [T3(100); S5(100)]	---	0.00358729	0.000420153	Ttn	titin	22138	Ttn	2 C3|2 45.13 cM	protein-coding	-2s	25.2591	25.9229	25.8114	24.4344	24.1189	26.7466	24.9541	27.1209	24.9715	26.7003
1418	116	E9Q8T1_TPSSPSKSPASFEIPASTTEADGDGLNKPAK_2xPhospho [S3(84.6); S4(84.6)]_2xPhospho [T1(27.7); S3(84.6); S4(84.6); S6(1.4); S8(0.9); S11(0.9); S17(0); T18(0); T19(0)]	E9Q8T1	Tacc2	5	5	22.9409	22.0619	22.5014	0.135407	1.83907	1.83907	6Mo-KO_1Way up vs WT	-1.26729	4.28621	0.87898	E9Q8T1	TPSSPSKSPASFEIPASTTEADGDGLNKPAK	2xPhospho [S3(84.6); S4(84.6)]	2xPhospho [T1(27.7); S3(84.6); S4(84.6); S6(1.4); S8(0.9); S11(0.9); S17(0); T18(0); T19(0)]	NP_001004468	0.000163723	0.000420153	Tacc2	transforming, acidic coiled-coil containing protein 2	57752	Tacc2	7|7 F3	protein-coding	+2s	22.9988	23.2545	22.9075	23.2367	22.307	23.8751	21.0658	22.3541	21.3808	21.6338
1187	117	A0A087WSE3_AVSPAATQPPPPSGAGK_1xPhospho [S3(100)]_1xPhospho [S3(100); T7(0); S13(0)]	A0A087WSE3	---	5	5	22.1548	21.2101	21.6824	0.135423	1.92471	1.92471	6Mo-KO_1Way up vs WT	-1.28997	4.77868	0.94464	A0A087WSE3	AVSPAATQPPPPSGAGK	1xPhospho [S3(100)]	1xPhospho [S3(100); T7(0); S13(0)]	---	0.00141862	0.000420153	Speg	SPEG complex locus	11790	Speg	1 C4|1 38.88 cM	protein-coding	+2s	21.5746	22.2918	21.6165	23.0179	22.273	21.4992	20.8219	22.0917	22.1886	19.4492
1191	118	A0A087WSE3_VPTVPPRPGSSLSGSIENLESEAVFEAK_2xPhospho [S13(99.9); S15(99.9)]_2xPhospho [T3(0); S10(0); S11(0.2); S13(99.9); S15(99.9); S21(0)]	A0A087WSE3	---	5	5	24.2863	24.7198	24.5031	0.137252	0.740453	-1.35052	6Mo-KO_1Way down vs WT	-2.05462	1.12649	-0.43352	A0A087WSE3	VPTVPPRPGSSLSGSIENLESEAVFEAK	2xPhospho [S13(99.9); S15(99.9)]	2xPhospho [T3(0); S10(0); S11(0.2); S13(99.9); S15(99.9); S21(0)]	---	0.000202189	0.000420153	Speg	SPEG complex locus	11790	Speg	1 C4|1 38.88 cM	protein-coding	-1s	25.0838	24.0069	24.5862	24.1257	23.6289	24.7379	25.0025	24.5623	24.6265	24.6699
596	119	P59997_SCEEPLTPPPHSPTSMLQLIHDPVSPR_1xCarbamidomethyl [C2]; 1xDeamidated [Q18]; 2xPhospho [T7(93.6); S12(97.9)]_1xCarbamidomethyl [C2]; 1xDeamidated [Q18]; 2xPhospho [S1(6.4); T7(93.6); S12(97.9); T14(1.9); S15(0.2); S25(0)]	P59997	Kdm2a	5	5	20.8922	21.9236	21.4079	0.13877	0.489235	-2.04401	6Mo-KO_1Way down vs WT	-5.57127	1.33349	-1.0314	P59997	SCEEPLTPPPHSPTSMLQLIHDPVSPR	1xCarbamidomethyl [C2]; 1xDeamidated [Q18]; 2xPhospho [T7(93.6); S12(97.9)]	1xCarbamidomethyl [C2]; 1xDeamidated [Q18]; 2xPhospho [S1(6.4); T7(93.6); S12(97.9); T14(1.9); S15(0.2); S25(0)]	NP_001001984	0.0180902	0.00109972	Kdm2a	lysine (K)-specific demethylase 2A	225876	Kdm2a	19|19 A	protein-coding	-2s	20.7455	20.2772	20.4513	21.1933	21.7937	21.0777	22.8436	20.9807	21.0267	23.6893
1301	120	Q8VBT0_VEEEQEADEEDVSEEEAEDREGASK_1xPhospho [S24(79.9)]_1xPhospho [S13(20.1); S24(79.9)]	Q8VBT0	Tmx1	5	5	22.4313	21.6129	22.0221	0.138845	1.76347	1.76347	6Mo-KO_1Way up vs WT	-1.25677	3.90835	0.81842	Q8VBT0	VEEEQEADEEDVSEEEAEDREGASK	1xPhospho [S24(79.9)]	1xPhospho [S13(20.1); S24(79.9)]	NP_082615	0.0340097	0.00203657	Tmx1	thioredoxin-related transmembrane protein 1	72736	Tmx1	12|12 C2	protein-coding	+2s	22.521	22.5446	22.661	21.0024	23.4276	21.842	20.4218	21.8197	22.1498	21.8312
1486	121	E9PUD0_SRPSSPAVR_2xPhospho [S1(100); S]_2xPhospho [S1(100); S4(50); S5(50)]	E9PUD0	---	5	5	21.0103	23.3837	22.197	0.140532	0.192993	-5.18154	6Mo-KO_1Way down vs WT	-52.6836	1.96227	-2.37338	E9PUD0	SRPSSPAVR	2xPhospho [S1(100); S]	2xPhospho [S1(100); S4(50); S5(50)]	---	0.0306626	0.00157378	Zranb2	zinc finger, RAN-binding domain containing 2	53861	Zranb2	3|3 H4	protein-coding	-6s	23.5268	15.6888	22.2137	22.1757	21.4465	22.3983	22.7428	23.7029	23.0077	25.0667
1321	122	A2ASS6_KTPSPIEAER_2xPhospho [T2(100); S4(100)]_2xPhospho [T2(100); S4(100)]	A2ASS6	---	5	5	31.8828	31.7296	31.8062	0.142696	1.11202	1.11202	6Mo-KO_1Way up vs WT	-1.04545	1.29278	0.15318	A2ASS6	KTPSPIEAER	2xPhospho [T2(100); S4(100)]	2xPhospho [T2(100); S4(100)]	---	0.000673166	0.000420153	Ttn	titin	22138	Ttn	2 C3|2 45.13 cM	protein-coding	+0.5s	31.8828	31.8828	31.8828	31.8828	31.8828	31.8835	31.4988	31.8835	31.4988	31.8835
1112	123	Q61165_LDSPTLSR_1xPhospho [S3(100)]_1xPhospho [S3(100); T5(0); S7(0)]	Q61165	Slc9a1	5	5	21.6557	21.2715	21.4636	0.143328	1.30512	1.30512	6Mo-KO_1Way up vs WT	-1.11868	1.90549	0.38418	Q61165	LDSPTLSR	1xPhospho [S3(100)]	1xPhospho [S3(100); T5(0); S7(0)]	NP_058677	0.0655352	0.00288454	Slc9a1	solute carrier family 9 (sodium/hydrogen exchanger), member 1	20544	Slc9a1	4 D2.3|4 66.25 cM	protein-coding	+1s	21.0892	22.0207	21.6627	22.1033	21.4025	21.2104	21.1841	20.9586	21.8078	21.1966
1290	124	A0A087WQ94_TVGTNTPPSPGFGR_1xPhospho [S9(100)]_1xPhospho [T1(0); T4(0); T6(0); S9(100)]	A0A087WQ94	---	5	5	24.1379	22.9818	23.5599	0.143612	2.22867	2.22867	6Mo-KO_1Way up vs WT	-1.40277	6.96749	1.15618	A0A087WQ94	TVGTNTPPSPGFGR	1xPhospho [S9(100)]	1xPhospho [T1(0); T4(0); T6(0); S9(100)]	---	8.04545e-05	0.000420153	Tns1	tensin 1	21961	Tns1	1 C3|1 38.17 cM	protein-coding	+2s	24.0472	24.637	24.0831	25.2424	22.68	22.72	24.9919	21.811	23.3706	22.0153
854	125	A2AS44_VASPSQGQVGSSSPKR_1xPhospho [S11(83.1)]_1xPhospho [S3(0); S5(0); S11(83.1); S12(8.5); S13(8.5)]	A2AS44	---	5	5	20.2147	19.3403	19.7775	0.144188	1.83322	1.83322	6Mo-KO_1Way up vs WT	-1.29353	4.34718	0.87438	A2AS44	VASPSQGQVGSSSPKR	1xPhospho [S11(83.1)]	1xPhospho [S3(0); S5(0); S11(83.1); S12(8.5); S13(8.5)]	---	0.100387	0.00392242	Pkp4	plakophilin 4	227937	Pkp4	2|2 C1.1	protein-coding	+2s	19.7068	20.0326	19.7415	20.7116	20.881	19.5341	19.7306	17.5625	20.4698	19.4046
1252	126	Q8CC35_SSPGLYTAPVQDSLQPTAVSPTYSSDISPVSPSR_1xPhospho [S/T/Y]_1xPhospho [S1(43); S2(43); Y6(0.1); T7(13.7); S13(0.1); T17(0.1); S20(0); T22(0); Y23(0); S24(0); S25(0); S28(0); S31(0); S33(0)]	Q8CC35	---	5	5	21.4135	21.0877	21.2506	0.144225	1.25338	1.25338	6Mo-KO_1Way up vs WT	-1.10069	1.72914	0.32582	Q8CC35	SSPGLYTAPVQDSLQPTAVSPTYSSDISPVSPSR	1xPhospho [S/T/Y]	1xPhospho [S1(43); S2(43); Y6(0.1); T7(13.7); S13(0.1); T17(0.1); S20(0); T22(0); Y23(0); S24(0); S25(0); S28(0); S31(0); S33(0)]	---	0.0839722	0.00360171	Synpo	synaptopodin	104027	Synpo	18|18 D3- E1	protein-coding	+0.5s	21.229	21.5485	21.2718	21.4268	21.5913	20.4698	20.9121	21.1387	21.3703	21.5474
1089	127	A0A0A0MQD5_LGAEEERPGTPELAPAPMQAAAVAEPMPSPR_2xPhospho [T10(100); S29(100)]_2xPhospho [T10(100); S29(100)]	A0A0A0MQD5	---	5	5	21.4125	20.2893	20.8509	0.144992	2.17839	2.17839	6Mo-KO_1Way up vs WT	-1.39541	6.62173	1.12326	A0A0A0MQD5	LGAEEERPGTPELAPAPMQAAAVAEPMPSPR	2xPhospho [T10(100); S29(100)]	2xPhospho [T10(100); S29(100)]	---	0.0659787	0.00288454	Shank3	SH3 and multiple ankyrin repeat domains 3	58234	Shank3	15|15 E3	protein-coding	+2s	21.5558	20.0255	21.1967	21.5558	22.7288	19.9387	21.0416	18.7153	19.8559	21.8948
395	128	Q76LL6_SPLSAPTSPCSPSVPAFKPSQVR_1xCarbamidomethyl [C10]; 2xPhospho [S13(99.7); S/T]_1xCarbamidomethyl [C10]; 2xPhospho [S1(43.4); S4(43.4); T7(10.2); S8(2.6); S11(0.8); S13(99.7); S20(0)]	Q76LL6	Fhod3	5	5	22.9756	22.2754	22.6255	0.145058	1.62478	1.62478	6Mo-KO_1Way up vs WT	-1.23101	3.24975	0.70024	Q76LL6	SPLSAPTSPCSPSVPAFKPSQVR	1xCarbamidomethyl [C10]; 2xPhospho [S13(99.7); S/T]	1xCarbamidomethyl [C10]; 2xPhospho [S1(43.4); S4(43.4); T7(10.2); S8(2.6); S11(0.8); S13(99.7); S20(0)]	NP_001276583	0.0284157	0.00132202	Fhod3	formin homology 2 domain containing 3	225288	Fhod3	18|18 A2	protein-coding	+1s	22.2766	22.9396	22.4513	22.7978	24.4128	22.4954	22.8058	22.4254	21.5586	22.0917
567	129	A0A1L1SSC0_RGSVVSEVDDAGISDLTSLDEK_2xPhospho [S3(100); S6(100)]_2xPhospho [S3(100); S6(100); S14(0); T17(0); S18(0)]	A0A1L1SSC0	---	5	5	23.1188	23.9691	23.5439	0.147051	0.554692	-1.8028	6Mo-KO_1Way down vs WT	-4.2031	1.29322	-0.85024	A0A1L1SSC0	RGSVVSEVDDAGISDLTSLDEK	2xPhospho [S3(100); S6(100)]	2xPhospho [S3(100); S6(100); S14(0); T17(0); S18(0)]	---	1.05586e-06	0.000420153	Lrrfip2	leucine rich repeat (in FLII) interacting protein 2	71268	Lrrfip2	9|9 F3	protein-coding	-2s	24.1756	21.7101	23.6532	23.8319	22.2234	23.9799	23.3016	24.034	23.8861	24.6438
257	130	Q63918_FQHPNTDMLQEKPSSPSPMPSSTPSPSLNLGSTEEAIR_1xDeamidated [N]; 1xOxidation [M]; 2xPhospho [S/T]_1xDeamidated [N5; N29]; 1xOxidation [M8; M19]; 2xPhospho [T6(0); S14(0.1); S15(0.3); S17(0.3); S21(16.8); S22(45.5); T23(45.5); S25(45.5); S27(45.6); S32(0.2);¬'╓$b*	Q63918	Cavin2	5	5	23.0769	22.0983	22.5876	0.147594	1.97047	1.97047	6Mo-KO_1Way up vs WT	-1.3464	5.22775	0.97854	Q63918	FQHPNTDMLQEKPSSPSPMPSSTPSPSLNLGSTEEAIR	1xDeamidated [N]; 1xOxidation [M]; 2xPhospho [S/T]	1xDeamidated [N5; N29]; 1xOxidation [M8; M19]; 2xPhospho [T6(0); S14(0.1); S15(0.3); S17(0.3); S21(16.8); S22(45.5); T23(45.5); S25(45.5); S27(45.6); S32(0.2);¬'╓$b*	NP_620080	0.0531159	0.00252693	Cavin2	caveolae associated 2	20324	Cavin2	1|1 C1.1	protein-coding	+2s	22.9433	22.7435	22.9946	23.6975	23.0054	22.2878	22.8349	22.9195	19.7847	22.6647
599	131	P14152_KLSSAMSAAK_1xOxidation [M6]; 1xPhospho [S3(89.3)]_1xOxidation [M6]; 1xPhospho [S3(89.3); S4(1.1); S7(9.6)]	P14152	Mdh1	5	5	21.6865	22.4847	22.0856	0.148817	0.575042	-1.739	6Mo-KO_1Way down vs WT	-3.86519	1.27812	-0.79826	P14152	KLSSAMSAAK	1xOxidation [M6]; 1xPhospho [S3(89.3)]	1xOxidation [M6]; 1xPhospho [S3(89.3); S4(1.1); S7(9.6)]	NP_001303604	0.00200205	0.000420153	Mdh1	malate dehydrogenase 1, NAD (soluble)	17449	Mdh1	11 A3.1|11 13.89 cM	protein-coding	-2s	20.5873	21.0728	22.3981	21.6382	22.736	22.3104	22.4574	22.5334	21.6249	23.4976
823	132	Q5SWV3_IHIDPESQDCSPATSR_1xCarbamidomethyl [C10]; 1xPhospho [S/T]_1xCarbamidomethyl [C10]; 1xPhospho [S7(49.9); S11(49.9); T14(0.1); S15(0)]	Q5SWV3	---	5	5	22.0903	21.5697	21.83	0.151315	1.43463	1.43463	6Mo-KO_1Way up vs WT	-1.17788	2.42428	0.52068	Q5SWV3	IHIDPESQDCSPATSR	1xCarbamidomethyl [C10]; 1xPhospho [S/T]	1xCarbamidomethyl [C10]; 1xPhospho [S7(49.9); S11(49.9); T14(0.1); S15(0)]	---	0.0686998	0.00288454	Pdlim4	PDZ and LIM domain 4	30794	Pdlim4	11 B1.3|11 32.13 cM	protein-coding	+1s	21.9966	22.0246	22.1409	22.5054	21.7842	21.3294	21.2648	21.6287	22.7073	20.9181
891	133	F6R8S6_AATATRPPGPPPAPQPPSPAPSPPPRPALAR_1xDeamidated [Q15]; 2xPhospho [S18(99.7); S22(99.9)]_1xDeamidated [Q15]; 2xPhospho [T3(0.1); T5(0.3); S18(99.7); S22(99.9)]	F6R8S6	---	5	5	21.9696	22.9231	22.4463	0.152769	0.516371	-1.93659	6Mo-KO_1Way down vs WT	-5.08134	1.35488	-0.95352	F6R8S6	AATATRPPGPPPAPQPPSPAPSPPPRPALAR	1xDeamidated [Q15]; 2xPhospho [S18(99.7); S22(99.9)]	1xDeamidated [Q15]; 2xPhospho [T3(0.1); T5(0.3); S18(99.7); S22(99.9)]	---	0.0506415	0.00252693	Akt1s1	AKT1 substrate 1 (proline-rich)	67605	Akt1s1	7|7 B3	protein-coding	-2s	22.1875	22.2326	22.6099	21.1692	21.6489	22.032	23.4585	22.1836	22.0948	24.8468
322	134	Q9DD18_SASSGAEGDVSSEREP_1xPhospho [S1(95.5)]_1xPhospho [S1(95.5); S3(2.3); S4(2.3); S11(0); S12(0)]	Q9DD18	Dtd1	5	5	22.6781	21.5564	22.1172	0.153634	2.176	2.176	6Mo-KO_1Way up vs WT	-1.43334	6.78683	1.12168	Q9DD18	SASSGAEGDVSSEREP	1xPhospho [S1(95.5)]	1xPhospho [S1(95.5); S3(2.3); S4(2.3); S11(0); S12(0)]	NP_079590	0.0382365	0.00237867	Dtd1	D-tyrosyl-tRNA deacylase 1	66044	Dtd1	2|2 G1	protein-coding	+2s	22.7524	23.4633	23.5588	22.5099	21.1061	22.9002	20.3698	22.4027	22.0029	20.1065
662	135	P04247_RHSGDFGADAQGAMSK_1xPhospho [S3(100)]_1xPhospho [S3(100); S15(0)]	P04247	Mb	5	5	23.4769	23.3039	23.3904	0.154086	1.1274	1.1274	6Mo-KO_1Way up vs WT	-1.05733	1.3439	0.173	P04247	RHSGDFGADAQGAMSK	1xPhospho [S3(100)]	1xPhospho [S3(100); S15(0)]	NP_001157519	2.76169e-05	0.000420153	Mb	myoglobin	17189	Mb	15 D3|15 36.36 cM	protein-coding	+0.5s	23.4465	23.6831	23.2485	23.6056	23.4009	23.0535	23.2868	23.5416	23.2761	23.3616
267	136	Q63918_FQHPNTDMLQEKPSSPSPMPSSTPSPSLNLGSTEEAIR_1xOxidation [M]; 2xPhospho [S25(83.8); S27(99)]_1xOxidation [M8; M19]; 2xPhospho [T6(0); S14(0.2); S15(0.1); S17(0.5); S21(3.3); S22(3.3); T23(9.3); S25(83.8); S27(99); S32(0.4); T33(0.3)]	Q63918	Cavin2	5	5	22.6311	23.2811	22.9561	0.154178	0.637263	-1.56921	6Mo-KO_1Way down vs WT	-3.0367	1.23321	-0.65004	Q63918	FQHPNTDMLQEKPSSPSPMPSSTPSPSLNLGSTEEAIR	1xOxidation [M]; 2xPhospho [S25(83.8); S27(99)]	1xOxidation [M8; M19]; 2xPhospho [T6(0); S14(0.2); S15(0.1); S17(0.5); S21(3.3); S22(3.3); T23(9.3); S25(83.8); S27(99); S32(0.4); T33(0.3)]	NP_620080	0.0531159	0.00252693	Cavin2	caveolae associated 2	20324	Cavin2	1|1 C1.1	protein-coding	-1s	22.4286	23.2367	23.2749	22.3981	21.8172	23.6451	22.1708	23.5319	23.9302	23.1277
335	137	E9Q557_SSSLSDPLEESSPIAAIFDTENLEK_1xPhospho [S/T]_1xPhospho [S1(49.4); S2(49.4); S3(1); S5(0.2); S11(0); S12(0); T20(0)]	E9Q557	Dsp	5	5	22.6688	23.6828	23.1758	0.154236	0.495144	-2.01961	6Mo-KO_1Way down vs WT	-5.65759	1.38706	-1.01408	E9Q557	SSSLSDPLEESSPIAAIFDTENLEK	1xPhospho [S/T]	1xPhospho [S1(49.4); S2(49.4); S3(1); S5(0.2); S11(0); S12(0); T20(0)]	NP_076331	6.28959e-05	0.000420153	Dsp	desmoplakin	109620	Dsp	13|13 A3.3	protein-coding	-2s	22.8021	23.9175	23.3431	22.7468	20.5343	23.2761	24.5761	23.6069	24.0516	22.9035
305	138	Q3UMF0_EQTASAPATPLVSK_2xPhospho [S5(86.6); T9(99.9)]_2xPhospho [T3(13.4); S5(86.6); T9(99.9); S13(0.1)]	Q3UMF0	Cobll1	5	5	21.5186	22.3666	21.9426	0.157495	0.555547	-1.80003	6Mo-KO_1Way down vs WT	-4.29293	1.32494	-0.84802	Q3UMF0	EQTASAPATPLVSK	2xPhospho [S5(86.6); T9(99.9)]	2xPhospho [T3(13.4); S5(86.6); T9(99.9); S13(0.1)]	NP_081501	0.0030736	0.000420153	Cobll1	Cobl-like 1	319876	Cobll1	2|2 C1.3	protein-coding	-2s	22.3689	22.0586	21.9305	21.6977	19.5373	22.9093	21.7157	22.2775	22.5799	22.3507
1393	139	A2ASS6_IELSPSMEAPK_2xPhospho [S4(100); S6(100)]_2xPhospho [S4(100); S6(100)]	A2ASS6	---	5	5	20.3928	19.1284	19.7606	0.159764	2.40221	2.40221	6Mo-KO_1Way up vs WT	-1.53349	8.84916	1.26436	A2ASS6	IELSPSMEAPK	2xPhospho [S4(100); S6(100)]	2xPhospho [S4(100); S6(100)]	---	5.90373e-05	0.000420153	Ttn	titin	22138	Ttn	2 C3|2 45.13 cM	protein-coding	+2s	19.9104	19.6949	19.751	20.934	21.6737	17.2296	19.796	18.5379	18.5928	21.4859
1056	140	Q8BTI8_SRTPPSAPSQSR_2xPhospho [S1(83.9); S11(92)]_2xPhospho [S1(83.9); T3(19.2); S6(4); S9(1); S11(92)]	Q8BTI8	Srrm2	5	5	21.9483	22.4898	22.219	0.162686	0.687056	-1.45549	6Mo-KO_1Way down vs WT	-2.55544	1.20629	-0.5415	Q8BTI8	SRTPPSAPSQSR	2xPhospho [S1(83.9); S11(92)]	2xPhospho [S1(83.9); T3(19.2); S6(4); S9(1); S11(92)]	NP_780438	0.0105643	0.000644898	Srrm2	serine/arginine repetitive matrix 2	75956	Srrm2	17|17 A3.3	protein-coding	-1s	22.2516	21.9644	22.3259	21.543	21.6565	22.2522	23.4837	22.0381	21.7453	22.9296
405	141	Q8VHX6_LGSFGSITR_2xPhospho [S3(99.9); T8(99.1)]_2xPhospho [S3(99.9); S6(1); T8(99.1)]	Q8VHX6	Flnc	5	5	20.586	21.6994	21.1427	0.164799	0.462223	-2.16346	6Mo-KO_1Way down vs WT	-6.92827	1.48022	-1.11334	Q8VHX6	LGSFGSITR	2xPhospho [S3(99.9); T8(99.1)]	2xPhospho [S3(99.9); S6(1); T8(99.1)]	NP_001074654	0.0183441	0.00109972	Flnc	filamin C, gamma	68794	Flnc	6 A3.3|6 12.36 cM	protein-coding	-2s	21.2582	19.9585	19.8514	19.8919	21.9701	21.7536	20.4365	21.1097	21.3219	23.8751
176	142	Q8CCM0_KPDGVKESTESSNTTIEDEDVK_2xPhospho [S8(99.6); T9(85.1)]_2xPhospho [S8(99.6); T9(85.1); S11(13.2); S12(2.1); T14(0); T15(0)]	Q8CCM0	Camk2d	5	5	23.8631	22.5681	23.2156	0.166628	2.45391	2.45391	6Mo-KO_1Way up vs WT	-1.5886	9.56599	1.29508	Q8CCM0	KPDGVKESTESSNTTIEDEDVK	2xPhospho [S8(99.6); T9(85.1)]	2xPhospho [S8(99.6); T9(85.1); S11(13.2); S12(2.1); T14(0); T15(0)]	NP_001280595	0.00169123	0.000420153	Camk2d	calcium/calmodulin-dependent protein kinase II, delta	108058	Camk2d	3|3 G1- G2	protein-coding	+2s	23.0548	24.9162	24.3124	22.3538	24.6785	23.7567	20.0098	23.1812	22.2522	23.6404
425	143	P63250_HNSVECLDGLDDISTK_1xCarbamidomethyl [C6]; 1xPhospho [S3(100)]_1xCarbamidomethyl [C6]; 1xPhospho [S3(100); S14(0); T15(0)]	P63250	Kcnj3	5	5	20.76	21.5736	21.1668	0.168629	0.568952	-1.75762	6Mo-KO_1Way down vs WT	-4.15063	1.34359	-0.81362	P63250	HNSVECLDGLDDISTK	1xCarbamidomethyl [C6]; 1xPhospho [S3(100)]	1xCarbamidomethyl [C6]; 1xPhospho [S3(100); S14(0); T15(0)]	NP_032452	0.106488	0.00429411	Kcnj3	potassium inwardly-rectifying channel, subfamily J, member 3	16519	Kcnj3	2|2 C1.1	protein-coding	-2s	21.0657	19.9781	20.3246	22.2656	20.166	20.7037	22.4954	21.386	22.1962	21.0868
1350	144	A2ASS6_RRTPSPDYDLYYYR_1xPhospho [T3(100)]_1xPhospho [T3(100); S5(0); Y8(0); Y11(0); Y12(0); Y13(0)]	A2ASS6	---	5	5	20.5404	21.4812	21.0108	0.169354	0.520922	-1.91967	6Mo-KO_1Way down vs WT	-5.19528	1.40979	-0.94086	A2ASS6	RRTPSPDYDLYYYR	1xPhospho [T3(100)]	1xPhospho [T3(100); S5(0); Y8(0); Y11(0); Y12(0); Y13(0)]	---	0.00143872	0.000420153	Ttn	titin	22138	Ttn	2 C3|2 45.13 cM	protein-coding	-2s	19.5261	20.2123	19.9781	21.3554	21.6299	22.5293	21.8862	21.8658	19.7388	21.386
1034	145	E9PUK6_RASPSPPPKR_2xPhospho [S3(100); S5(100)]_2xPhospho [S3(100); S5(100)]	E9PUK6	Srrm1	5	5	20.8881	22.629	21.7585	0.169544	0.299175	-3.34253	6Mo-KO_1Way down vs WT	-21.1128	1.88971	-1.74094	E9PUK6	RASPSPPPKR	2xPhospho [S3(100); S5(100)]	2xPhospho [S3(100); S5(100)]	NP_058079	0.00586392	0.000644898	Srrm1	serine/arginine repetitive matrix 1	51796	Srrm1	4|4 D3	protein-coding	-3s	21.3441	20.1262	20.9582	19.5512	22.4607	21.3609	23.3662	24.6081	19.2195	24.5904
363	146	Q91VK2_GATPAEDDEDKDIDLFGSDEEEEDKEAAR_1xPhospho [S18(100)]_1xPhospho [T3(0); S18(100)]	Q91VK2	Eef1d	5	5	26.0492	25.7662	25.9077	0.170316	1.21679	1.21679	6Mo-KO_1Way up vs WT	-1.10971	1.64301	0.28308	Q91VK2	GATPAEDDEDKDIDLFGSDEEEEDKEAAR	1xPhospho [S18(100)]	1xPhospho [T3(0); S18(100)]	NP_001272363	0.000378128	0.000420153	Eef1d	eukaryotic translation elongation factor 1 delta (guanine nucleotide exchange protein)	66656	Eef1d	15|15 D3	protein-coding	+0.5s	26.0963	26.3834	26.4183	25.4962	25.852	25.8592	25.8273	25.4909	25.9152	25.7382
1259	147	Q91YE8_GCVASPVEGGR_1xCarbamidomethyl [C2]; 1xPhospho [S5(100)]_1xCarbamidomethyl [C2]; 1xPhospho [S5(100)]	Q91YE8	---	5	5	22.347	21.9592	22.1531	0.17089	1.30838	1.30838	6Mo-KO_1Way up vs WT	-1.15398	1.97545	0.38778	Q91YE8	GCVASPVEGGR	1xCarbamidomethyl [C2]; 1xPhospho [S5(100)]	1xCarbamidomethyl [C2]; 1xPhospho [S5(100)]	---	0.00318348	0.000420153	Synpo2	synaptopodin 2	118449	Synpo2	3|3 G1	protein-coding	+1s	21.826	22.1956	22.1642	22.9359	22.6131	21.6884	21.7536	21.9681	22.6163	21.7695
1135	148	Q62417_SAQDLSDVSTDEVGIPLR_1xPhospho [S1(100)]_1xPhospho [S1(100); S6(0); S9(0); T10(0)]	Q62417	Sorbs1	5	5	19.6795	18.611	19.1453	0.172356	2.09725	2.09725	6Mo-KO_1Way up vs WT	-1.49037	6.55532	1.0685	Q62417	SAQDLSDVSTDEVGIPLR	1xPhospho [S1(100)]	1xPhospho [S1(100); S6(0); S9(0); T10(0)]	NP_001030134	0.00398584	0.000420153	Sorbs1	sorbin and SH3 domain containing 1	20411	Sorbs1	19 C3|19 34.25 cM	protein-coding	+2s	18.8498	19.2448	19.2642	21.7139	19.3246	18.1328	17.6839	18.3997	18.3207	20.5177
1146	149	B2RXQ9_SLDSAETYSQHAQSLDGTMGSSIPLYR_1xOxidation [M19]; 2xPhospho [S1(89.8); S14(83)]_1xOxidation [M19]; 2xPhospho [S1(89.8); S4(9.6); T7(1.5); Y8(0.3); S9(3.1); S14(83); T18(8.6); S21(3); S22(1.1); Y26(0)]	B2RXQ9	Sorbs2	5	5	22.4959	23.0037	22.7498	0.172817	0.703284	-1.4219	6Mo-KO_1Way down vs WT	-2.44559	1.20961	-0.50782	B2RXQ9	SLDSAETYSQHAQSLDGTMGSSIPLYR	1xOxidation [M19]; 2xPhospho [S1(89.8); S14(83)]	1xOxidation [M19]; 2xPhospho [S1(89.8); S4(9.6); T7(1.5); Y8(0.3); S9(3.1); S14(83); T18(8.6); S21(3); S22(1.1); Y26(0)]	NP_001297636	0.00754793	0.000644898	Sorbs2	sorbin and SH3 domain containing 2	234214	Sorbs2	8|8 B1.1	protein-coding	-1s	22.2557	22.2186	22.6131	22.8783	22.5137	23.654	21.9435	22.8182	22.9488	23.654
929	150	Q60829_AVQHLQTISNLSENQASEEEDELGELR_1xPhospho [T/S]_1xPhospho [T7(49.1); S9(1.6); S12(0.3); S17(49.1)]	Q60829	Ppp1r1b	5	5	20.4043	19.7073	20.0558	0.173892	1.62118	1.62118	6Mo-KO_1Way up vs WT	-1.30122	3.41988	0.69704	Q60829	AVQHLQTISNLSENQASEEEDELGELR	1xPhospho [T/S]	1xPhospho [T7(49.1); S9(1.6); S12(0.3); S17(49.1)]	NP_001300899	0.000936875	0.000420153	Ppp1r1b	protein phosphatase 1, regulatory inhibitor subunit 1B	19049	Ppp1r1b	11|11 D	protein-coding	+1s	20.4635	20.7931	20.3298	20.0379	20.3972	19.842	18.1328	20.0038	20.9226	19.6351
826	151	P97467_GSSGLNLGNFFASR_1xDeamidated [N9]; 1xPhospho [S]_1xDeamidated [N6; N9]; 1xPhospho [S2(50); S3(50); S13(0)]	P97467	Pam	5	5	19.0548	20.0086	19.5317	0.175034	0.516249	-1.93705	6Mo-KO_1Way down vs WT	-5.39623	1.43817	-0.95386	P97467	GSSGLNLGNFFASR	1xDeamidated [N9]; 1xPhospho [S]	1xDeamidated [N6; N9]; 1xPhospho [S2(50); S3(50); S13(0)]	NP_038654	0.0398474	0.00237867	Pam	peptidylglycine alpha-amidating monooxygenase	18484	Pam	1 D|1 47.76 cM	protein-coding	-2s	19.6106	18.7653	19.5894	19.9845	17.324	19.321	21.2615	19.9069	20.6481	18.9056
872	152	A0A0U1RPA0_RSVDISLGGSPR_2xPhospho [S2(100); S10(85.5)]_2xPhospho [S2(100); S6(14.5); S10(85.5)]	A0A0U1RPA0	---	5	5	21.1137	21.5385	21.3261	0.17504	0.744942	-1.34239	6Mo-KO_1Way down vs WT	-2.11855	1.17566	-0.4248	A0A0U1RPA0	RSVDISLGGSPR	2xPhospho [S2(100); S10(85.5)]	2xPhospho [S2(100); S6(14.5); S10(85.5)]	---	0.112927	0.00543843	Plekha7	pleckstrin homology domain containing, family A member 7	233765	Plekha7	7|7 F1	protein-coding	-1s	21.6165	21.0414	21.6737	21.0844	20.1527	21.6956	21.2221	21.5767	21.5906	21.6077
965	153	F6R6F1_QRSHSGTSPDNTAPPPPPPRPQPSHSR_2xPhospho [T7(93.5); S8(93.5)]_2xPhospho [S3(1.1); S5(11.9); T7(93.5); S8(93.5); T12(0); S24(0); S26(0)]	F6R6F1	---	5	5	20.2269	21.1321	20.6795	0.176505	0.533973	-1.87275	6Mo-KO_1Way down vs WT	-4.96974	1.41701	-0.90516	F6R6F1	QRSHSGTSPDNTAPPPPPPRPQPSHSR	2xPhospho [T7(93.5); S8(93.5)]	2xPhospho [S3(1.1); S5(11.9); T7(93.5); S8(93.5); T12(0); S24(0); S26(0)]	---	0.0107132	0.000644898	Reps1	RalBP1 associated Eps domain containing protein	19707	Reps1	10|10 A3	protein-coding	-2s	21.0072	20.9507	21.2922	19.6623	18.2223	21.6018	20.4698	21.4787	21.2286	20.8816
1395	154	J3QQ40_GLRDSPSSSEDREEDEPSSRPVTSQTASK_2xPhospho [S5(83.2); S/T]_2xPhospho [S5(83.2); S7(29.1); S8(70.9); S9(16.9); S18(0); S19(0); T23(0); S24(0); T26(0); S28(0)]	J3QQ40	---	5	5	21.7408	22.8844	22.3126	0.17774	0.452604	-2.20944	6Mo-KO_1Way down vs WT	-7.61281	1.55948	-1.14368	J3QQ40	GLRDSPSSSEDREEDEPSSRPVTSQTASK	2xPhospho [S5(83.2); S/T]	2xPhospho [S5(83.2); S7(29.1); S8(70.9); S9(16.9); S18(0); S19(0); T23(0); S24(0); T26(0); S28(0)]	---	0.0744641	0.0035115	Tor1aip1	torsin A interacting protein 1	208263	Tor1aip1	1|1 G3	protein-coding	-2s	22.7555	22.5498	21.2035	21.0346	21.1604	23.7241	24.5689	23.2976	20.6592	22.1724
656	155	V9GWW6_AEYVFIVDSDGEDEATCR_1xCarbamidomethyl [C17]; 1xPhospho [S9(100)]_1xCarbamidomethyl [C17]; 1xPhospho [Y3(0); S9(100); T16(0)]	V9GWW6	---	5	5	22.1074	20.7362	21.4218	0.178027	2.58686	2.58686	6Mo-KO_1Way up vs WT	-1.7055	11.4129	1.3712	V9GWW6	AEYVFIVDSDGEDEATCR	1xCarbamidomethyl [C17]; 1xPhospho [S9(100)]	1xCarbamidomethyl [C17]; 1xPhospho [Y3(0); S9(100); T16(0)]	---	0.0137801	0.00109972	Mlip	muscular LMNA-interacting protein	69642	Mlip	9|9 D	protein-coding	+2s	21.7049	22.2234	22.3783	22.0778	22.1526	17.6283	20.0357	21.2918	23.1519	21.5733
497	156	G5E8J6_HHTQDHQGHNEEQDDDDDDDDDDEDKEDSTEHR_1xPhospho [S29(78.6)]_1xPhospho [T3(0); S29(78.6); T30(21.4)]	G5E8J6	Hrc	5	5	20.8895	19.6637	20.2766	0.179724	2.33882	2.33882	6Mo-KO_1Way up vs WT	-1.62105	8.86726	1.22578	G5E8J6	HHTQDHQGHNEEQDDDDDDDDDDEDKEDSTEHR	1xPhospho [S29(78.6)]	1xPhospho [T3(0); S29(78.6); T30(21.4)]	NP_034603	0.0927535	0.00378567	Hrc	histidine rich calcium binding protein	15464	Hrc	7 B3|7 29.26 cM	protein-coding	+2s	18.2584	21.9122	21.1096	20.8256	22.3416	19.1581	19.9879	20.1704	18.2553	20.7468
856	157	A2AS44_AASPYSQRPASPTAVR_2xPhospho [S3(100); S11(86.3)]_2xPhospho [S3(100); Y5(0); S6(0); S11(86.3); T13(13.7)]	A2AS44	---	5	5	26.0861	25.8176	25.9519	0.180868	1.2045	1.2045	6Mo-KO_1Way up vs WT	-1.11255	1.61412	0.26844	A2AS44	AASPYSQRPASPTAVR	2xPhospho [S3(100); S11(86.3)]	2xPhospho [S3(100); Y5(0); S6(0); S11(86.3); T13(13.7)]	---	0.0545815	0.00252693	Pkp4	plakophilin 4	227937	Pkp4	2|2 C1.1	protein-coding	+0.5s	26.2255	25.8218	25.8992	25.8863	26.5975	26.0309	25.9812	25.5425	25.9812	25.5523
603	158	A2AJI1_RSSQPSPTTVPASDSPPAK_1xPhospho [S3(88.4)]_1xPhospho [S2(11.6); S3(88.4); S6(0); T8(0); T9(0); S13(0); S15(0)]	A2AJI1	Map7d1	5	5	23.1115	22.7893	22.9504	0.182217	1.25018	1.25018	6Mo-KO_1Way up vs WT	-1.13793	1.77853	0.32214	A2AJI1	RSSQPSPTTVPASDSPPAK	1xPhospho [S3(88.4)]	1xPhospho [S2(11.6); S3(88.4); S6(0); T8(0); T9(0); S13(0); S15(0)]	NP_001139442	0.0161805	0.00109972	Map7d1	MAP7 domain containing 1	245877	Map7d1	4|4 D2.2	protein-coding	+0.5s	22.6401	22.9615	22.9131	23.6885	23.3542	22.8654	22.7811	22.8818	23.0763	22.3421
259	159	Q63918_RGNNSAVGSNADLTIEEDEEEEPVALQQAQQVR_2xDeamidated [N/Q]; 1xPhospho [S9(99.3)]_2xDeamidated [N3; N4; N10; Q27; Q28; Q30; Q31]; 1xPhospho [S5(0.7); S9(99.3); T14(0)]	Q63918	Cavin2	5	5	23.2008	23.6775	23.4392	0.183648	0.718639	-1.39152	6Mo-KO_1Way down vs WT	-2.34876	1.213	-0.47666	Q63918	RGNNSAVGSNADLTIEEDEEEEPVALQQAQQVR	2xDeamidated [N/Q]; 1xPhospho [S9(99.3)]	2xDeamidated [N3; N4; N10; Q27; Q28; Q30; Q31]; 1xPhospho [S5(0.7); S9(99.3); T14(0)]	NP_620080	0.000372846	0.000420153	Cavin2	caveolae associated 2	20324	Cavin2	1|1 C1.1	protein-coding	-1s	22.8934	23.4523	22.3201	23.5752	23.7631	23.914	23.7029	23.1444	24.2478	23.3783
106	160	Q9JIX8_SLSPLSGTTDTK_1xPhospho [S3(99.4)]_1xPhospho [S1(0.5); S3(99.4); S6(0); T8(0); T9(0); T11(0)]	Q9JIX8	Acin1	5	5	21.5514	22.2894	21.9204	0.1838	0.599562	-1.66789	6Mo-KO_1Way down vs WT	-3.75244	1.3489	-0.73802	Q9JIX8	SLSPLSGTTDTK	1xPhospho [S3(99.4)]	1xPhospho [S1(0.5); S3(99.4); S6(0); T8(0); T9(0); T11(0)]	NP_001078942	0.15162	0.00912834	Acin1	apoptotic chromatin condensation inducer 1	56215	Acin1	14|14 C2	protein-coding	-1s	21.0976	21.6706	20.941	22.0398	22.0078	22.2925	21.8483	20.9305	22.7125	23.6631
1461	161	E9Q6R7_AAQASLNALNDPIAVEQALQEK_1xPhospho [S5(100)]_1xPhospho [S5(100)]	E9Q6R7	Utrn	5	5	20.2823	21.7309	21.0066	0.184201	0.366382	-2.72939	6Mo-KO_1Way down vs WT	-13.4266	1.80233	-1.44858	E9Q6R7	AAQASLNALNDPIAVEQALQEK	1xPhospho [S5(100)]	1xPhospho [S5(100)]	NP_035812	0.000764018	0.000420153	Utrn	utrophin	22288	Utrn	10 A1|10 3.77 cM	protein-coding	-2s	19.8108	20.0119	21.1468	22.4025	18.0396	22.0381	23.2297	21.6338	22.5334	19.2195
795	162	Z4YJE4_RMSREPTLDSISELPEEDSR_2xPhospho [S3(100); T7(100)]_2xPhospho [S3(100); T7(100); S10(0); S12(0); S19(0)]	Z4YJE4	---	5	5	23.3861	23.8213	23.6037	0.185169	0.739571	-1.35214	6Mo-KO_1Way down vs WT	-2.18485	1.19504	-0.43524	Z4YJE4	RMSREPTLDSISELPEEDSR	2xPhospho [S3(100); T7(100)]	2xPhospho [S3(100); T7(100); S10(0); S12(0); S19(0)]	---	0.000141239	0.000420153	Obscn	obscurin, cytoskeletal calmodulin and titin-interacting RhoGEF	380698	Obscn	11|11 B1.3	protein-coding	-1s	24.135	23.4964	23.2545	23.5932	22.4513	23.6984	24.1754	23.7091	24.022	23.5017
495	163	G5E8J6_QGYEEEEDDDDDDGDDDSTEHVHQAHR_1xPhospho [T19(84.7)]_1xPhospho [Y3(0); S18(15.4); T19(84.7)]	G5E8J6	Hrc	5	5	21.2337	20.1922	20.7129	0.185622	2.0584	2.0584	6Mo-KO_1Way up vs WT	-1.53373	6.49839	1.04152	G5E8J6	QGYEEEEDDDDDDGDDDSTEHVHQAHR	1xPhospho [T19(84.7)]	1xPhospho [Y3(0); S18(15.4); T19(84.7)]	NP_034603	0.00393025	0.000420153	Hrc	histidine rich calcium binding protein	15464	Hrc	7 B3|7 29.26 cM	protein-coding	+2s	20.0326	21.1557	21.5	21.4659	22.0143	18.182	21.1796	20.3552	19.4492	21.7949
398	164	Q61554_GGPEPPASSEMDDNSLSPEACYECK_2xCarbamidomethyl [C21; C24]; 1xPhospho [S/Y]_2xCarbamidomethyl [C21; C24]; 1xPhospho [S8(50); S9(50); S15(0); S17(0); Y22(0)]	Q61554	Fbn1	5	5	25.1671	24.6071	24.8871	0.186837	1.47429	1.47429	6Mo-KO_1Way up vs WT	-1.26098	2.74077	0.56002	Q61554	GGPEPPASSEMDDNSLSPEACYECK	2xCarbamidomethyl [C21; C24]; 1xPhospho [S/Y]	2xCarbamidomethyl [C21; C24]; 1xPhospho [S8(50); S9(50); S15(0); S17(0); Y22(0)]	NP_032019	0.000347522	0.000420153	Fbn1	fibrillin 1	14118	Fbn1	2 F1|2 61.38 cM	protein-coding	+1s	24.7724	25.5249	25.3036	25.1993	25.0353	23.6404	25.2992	24.279	25.6106	24.2062
605	165	A2AJI1_AAEEKEPAAPASPAPSPVPSPTPAQPQK_3xPhospho [S12(100); S16(100); S20(99.8)]_3xPhospho [S12(100); S16(100); S20(99.8); T22(0.2)]	A2AJI1	Map7d1	5	5	22.4097	23.6739	23.0418	0.191675	0.416336	-2.40191	6Mo-KO_1Way down vs WT	-9.90648	1.71715	-1.26418	A2AJI1	AAEEKEPAAPASPAPSPVPSPTPAQPQK	3xPhospho [S12(100); S16(100); S20(99.8)]	3xPhospho [S12(100); S16(100); S20(99.8); T22(0.2)]	NP_001139442	0.000297698	0.000420153	Map7d1	MAP7 domain containing 1	245877	Map7d1	4|4 D2.2	protein-coding	-2s	21.9644	22.8449	23.5872	20.0899	23.5623	22.9488	25.216	22.8349	22.3388	25.0311
566	166	A0A1L1SSC0_SSPVPIDDDTASIVSSDR_1xPhospho [S/T]_1xPhospho [S1(50); S2(50); T10(0); S12(0); S15(0); S16(0)]	A0A1L1SSC0	---	5	5	23.4345	22.917	23.1758	0.192435	1.43153	1.43153	6Mo-KO_1Way up vs WT	-1.24914	2.55985	0.51756	A0A1L1SSC0	SSPVPIDDDTASIVSSDR	1xPhospho [S/T]	1xPhospho [S1(50); S2(50); T10(0); S12(0); S15(0); S16(0)]	---	2.94884e-06	0.000420153	Lrrfip2	leucine rich repeat (in FLII) interacting protein 2	71268	Lrrfip2	9|9 F3	protein-coding	+1s	22.8278	23.1497	22.9653	23.946	24.2838	22.6302	23.3505	22.4726	23.5557	22.5758
700	167	A0A338P6K2_VIENTDGSEEEMDAR_1xPhospho [S8(100)]_1xPhospho [T5(0); S8(100)]	A0A338P6K2	---	5	5	21.9121	21.0272	21.4697	0.192635	1.84656	1.84656	6Mo-KO_1Way up vs WT	-1.46348	4.99015	0.88484	A0A338P6K2	VIENTDGSEEEMDAR	1xPhospho [S8(100)]	1xPhospho [T5(0); S8(100)]	---	0.00054511	0.000420153	Myh11	myosin, heavy polypeptide 11, smooth muscle	17880	Myh11	16 A1|16 9.71 cM	protein-coding	+2s	21.7674	23.7769	21.9701	21.9561	20.0899	20.7663	20.3936	20.9979	21.4017	21.5767
1304	168	Q569Z6_ASVSDLSPR_1xPhospho [S7(100)]_1xPhospho [S2(0); S4(0); S7(100)]	Q569Z6	Thrap3	5	5	22.9929	22.7124	22.8527	0.192931	1.21458	1.21458	6Mo-KO_1Way up vs WT	-1.12856	1.66486	0.28046	Q569Z6	ASVSDLSPR	1xPhospho [S7(100)]	1xPhospho [S2(0); S4(0); S7(100)]	NP_666265	0.0050961	0.000644898	Thrap3	thyroid hormone receptor associated protein 3	230753	Thrap3	4|4 D2.2	protein-coding	+0.5s	22.5658	23.1998	23.0409	23.4328	22.725	22.5166	22.5758	22.5841	23.173	22.7125
733	169	P70441_SASSDTSEELNSQDSPKR_2xPhospho [S3(96.1); S15(98.1)]_2xPhospho [S1(1.8); S3(96.1); S4(1.8); T6(0.3); S7(0); S12(1.9); S15(98.1)]	P70441	Slc9a3r1	5	5	22.0011	21.144	21.5725	0.194933	1.81142	1.81142	6Mo-KO_1Way up vs WT	-1.45418	4.7715	0.85712	P70441	SASSDTSEELNSQDSPKR	2xPhospho [S3(96.1); S15(98.1)]	2xPhospho [S1(1.8); S3(96.1); S4(1.8); T6(0.3); S7(0); S12(1.9); S15(98.1)]	NP_036160	0.0124085	0.000953527	Slc9a3r1	solute carrier family 9 (sodium/hydrogen exchanger), member 3 regulator 1	26941	Slc9a3r1	11|11 E2	protein-coding	+2s	21.5913	22.2022	22.676	20.258	23.2782	21.1556	21.5967	22.0559	20.5717	20.3402
120	170	A0A087WNV1_GTPSQSPVVGR_2xPhospho [T2(100); S6(89.2)]_2xPhospho [T2(100); S4(10.8); S6(89.2)]	A0A087WNV1	---	5	5	22.3616	21.6942	22.0279	0.194959	1.58821	1.58821	6Mo-KO_1Way up vs WT	-1.33858	3.37644	0.6674	A0A087WNV1	GTPSQSPVVGR	2xPhospho [T2(100); S6(89.2)]	2xPhospho [T2(100); S4(10.8); S6(89.2)]	---	0.00169123	0.000420153	Agfg1	ArfGAP with FG repeats 1	15463	Agfg1	1|1 C5	protein-coding	+1s	22.7667	22.2557	22.0143	21.4025	23.369	21.928	20.9305	22.8654	21.3137	21.4336
1170	171	E9QA57_SGNISHQLSQDHLK_1xDeamidated [Q]; 1xPhospho [S5(97.1)]_1xDeamidated [Q7; Q10]; 1xPhospho [S1(1.5); S5(97.1); S9(1.5)]	E9QA57	Spata31d1b	5	5	25.6771	26.6313	26.1542	0.198253	0.516113	-1.93756	6Mo-KO_1Way down vs WT	-5.74695	1.53083	-0.95424	E9QA57	SGNISHQLSQDHLK	1xDeamidated [Q]; 1xPhospho [S5(97.1)]	1xDeamidated [Q7; Q10]; 1xPhospho [S1(1.5); S5(97.1); S9(1.5)]	NP_001161065	0.0472984	0.00237867	Spata31d1b	spermatogenesis associated 31 subfamily D, member 1B	238662	Spata31d1b	13|13 B2	protein-coding	-2s	24.5862	25.1372	24.9568	26.0593	27.6458	26.3334	27.4664	25.5976	26.0879	27.6712
115	172	Q8K4L2_SISFPEVPRSPK_1xPhospho [S10(100)]_1xPhospho [S1(0); S3(0); S10(100)]	Q8K4L2	---	5	5	20.1371	19.6379	19.8875	0.198297	1.41343	1.41343	6Mo-KO_1Way up vs WT	-1.2496	2.49642	0.4992	Q8K4L2	SISFPEVPRSPK	1xPhospho [S10(100)]	1xPhospho [S1(0); S3(0); S10(100)]	---	5.23829e-05	0.000420153	Svil	supervillin	225115	Svil	18|18 A1	protein-coding	+1s	19.4803	19.8586	19.8586	20.8742	20.6139	19.1711	19.4877	19.2772	20.5313	19.7223
440	173	P23242_MGQAGSTISNSHAQPFDFPDDSQNAKK_1xOxidation [M1]; 2xPhospho [S/T]_1xOxidation [M1]; 2xPhospho [S6(50); T7(50); S9(50); S11(50); S22(0)]	P23242	Gja1	5	5	23.8812	22.7953	23.3382	0.198718	2.12276	2.12276	6Mo-KO_1Way up vs WT	-1.62582	7.32609	1.08594	P23242	MGQAGSTISNSHAQPFDFPDDSQNAKK	1xOxidation [M1]; 2xPhospho [S/T]	1xOxidation [M1]; 2xPhospho [S6(50); T7(50); S9(50); S11(50); S22(0)]	NP_034418	0.00145909	0.000420153	Gja1	gap junction protein, alpha 1	14609	Gja1	10 B4|10 28.64 cM	protein-coding	+2s	24.3194	23.2422	23.6158	24.0566	24.1721	23.8425	23.5319	23.8861	22.8182	19.8977
1063	174	Q8BTI8_IHTTALTGQSPPLASGHQGEGDAPSVEPGATNIQQPSSPAPSTK_2xPhospho [S37(95.3); S38(94.4)]_2xPhospho [T3(0); T4(0); T7(0); S10(0); S15(0); S25(0); T31(3.5); S37(95.3); S38(94.4); S42(4.5); T43(2.2)]	Q8BTI8	Srrm2	5	5	27.6788	27.4249	27.5519	0.198748	1.19239	1.19239	6Mo-KO_1Way up vs WT	-1.12034	1.59291	0.25386	Q8BTI8	IHTTALTGQSPPLASGHQGEGDAPSVEPGATNIQQPSSPAPSTK	2xPhospho [S37(95.3); S38(94.4)]	2xPhospho [T3(0); T4(0); T7(0); S10(0); S15(0); S25(0); T31(3.5); S37(95.3); S38(94.4); S42(4.5); T43(2.2)]	NP_780438	0.0453958	0.00237867	Srrm2	serine/arginine repetitive matrix 2	75956	Srrm2	17|17 A3.3	protein-coding	+0.5s	27.6037	27.5249	27.4624	27.9015	27.9015	27.5571	27.6712	27.2403	27.7465	26.9096
519	175	E9PUA3_RSSAGSLESNVEGSIISSPHMR_2xPhospho [S2(92.6); S]_2xPhospho [S2(92.6); S3(3.7); S6(3.7); S9(0); S14(0.4); S17(49.8); S18(49.8)]	E9PUA3	Iqsec1	5	5	22.2377	21.6076	21.9227	0.198966	1.54763	1.54763	6Mo-KO_1Way up vs WT	-1.32634	3.17679	0.63006	E9PUA3	RSSAGSLESNVEGSIISSPHMR	2xPhospho [S2(92.6); S]	2xPhospho [S2(92.6); S3(3.7); S6(3.7); S9(0); S14(0.4); S17(49.8); S18(49.8)]	NP_001127856	0.0326299	0.00181132	Iqsec1	IQ motif and Sec7 domain 1	232227	Iqsec1	6 D1|6 40.16 cM	protein-coding	+1s	22.7497	21.4268	21.0816	22.7918	23.1385	21.4432	22.1886	21.2344	21.8766	21.2953
281	176	Q9EQG9_SSSMSSIDLVSASDDVHR_2xPhospho [S3(83.8); S]_2xPhospho [S1(2.4); S2(13.7); S3(83.8); S5(50.1); S6(50.1); S11(0); S13(0)]	Q9EQG9	Cert1	5	5	19.4002	18.7721	19.0861	0.199236	1.54546	1.54546	6Mo-KO_1Way up vs WT	-1.32577	3.16656	0.62804	Q9EQG9	SSSMSSIDLVSASDDVHR	2xPhospho [S3(83.8); S]	2xPhospho [S1(2.4); S2(13.7); S3(83.8); S5(50.1); S6(50.1); S11(0); S13(0)]	NP_001157694	0.0629335	0.00288454	Cert1	ceramide transporter 1	68018	Cert1	13|13 D1	protein-coding	+1s	20.0824	18.9663	19.0879	18.9299	19.9344	18.2894	18.0367	19.5956	18.182	19.757
157	177	Q9QYB8_AGTKSPAVSPSK_2xPhospho [S5(99.7); S9(87.7)]_2xPhospho [T3(0.4); S5(99.7); S9(87.7); S11(12.3)]	Q9QYB8	Add2	5	5	19.5193	20.7787	20.149	0.201855	0.417718	-2.39396	6Mo-KO_1Way down vs WT	-10.1829	1.7768	-1.2594	Q9QYB8	AGTKSPAVSPSK	2xPhospho [S5(99.7); S9(87.7)]	2xPhospho [T3(0.4); S5(99.7); S9(87.7); S11(12.3)]	NP_001258786	0.145067	0.00826345	Add2	adducin 2 (beta)	11519	Add2	6 C3- D1|6 37.55 cM	protein-coding	-2s	19.5181	19.0529	19.0224	18.9917	21.0116	20.8747	21.8948	17.8679	20.5634	22.6929
200	178	P61014_ASTIEMPQQAR_1xOxidation [M6]; 1xPhospho [S2(99.9)]_1xOxidation [M6]; 1xPhospho [S2(99.9); T3(0.1)]	P61014	Pln	5	5	25.2717	24.825	25.0483	0.202021	1.36292	1.36292	6Mo-KO_1Way up vs WT	-1.22641	2.27812	0.4467	P61014	ASTIEMPQQAR	1xOxidation [M6]; 1xPhospho [S2(99.9)]	1xOxidation [M6]; 1xPhospho [S2(99.9); T3(0.1)]	NP_001135399	0.00119833	0.000420153	Pln	phospholamban	18821	Pln	10|10 B3	protein-coding	+1s	24.9162	24.9279	25.0838	25.9229	25.5079	24.2606	25.2916	24.7309	25.5304	24.3117
1107	179	A0A0B4J1E2_GPPSPPAPVMHSPSR_1xOxidation [M10]; 2xPhospho [S4(100); S14(98.5)]_1xOxidation [M10]; 2xPhospho [S4(100); S12(1.6); S14(98.5)]	A0A0B4J1E2	Snw1	5	5	24.5215	24.203	24.3622	0.203913	1.24698	1.24698	6Mo-KO_1Way up vs WT	-1.15858	1.80156	0.31844	A0A0B4J1E2	GPPSPPAPVMHSPSR	1xOxidation [M10]; 2xPhospho [S4(100); S14(98.5)]	1xOxidation [M10]; 2xPhospho [S4(100); S12(1.6); S14(98.5)]	NP_079783	1.46959e-06	0.000420153	Snw1	SNW domain containing 1	66354	Snw1	12|12 D2	protein-coding	+0.5s	24.4297	24.1939	24.3194	24.5215	25.1429	24.2408	24.7073	23.908	24.3476	23.8115
1125	180	D3Z5J3; A0A286YD34; Q62417; E9Q6A3_TPVDYIDLPYSSSPSR_1xPhospho [S/T/Y]_1xPhospho [T1(0); Y5(0); Y10(0); S11(9.7); S12(9.7); S13(9.7); S15(70.8)]	D3Z5J3; A0A286YD34; Q62417; E9Q6A3	---	5	5	22.873	22.1822	22.5276	0.203917	1.61411	1.61411	6Mo-KO_1Way up vs WT	-1.37617	3.5854	0.69074	D3Z5J3; A0A286YD34; Q62417; E9Q6A3	TPVDYIDLPYSSSPSR	1xPhospho [S/T/Y]	1xPhospho [T1(0); Y5(0); Y10(0); S11(9.7); S12(9.7); S13(9.7); S15(70.8)]	---	0.00633431	0.000644898	Sorbs1	sorbin and SH3 domain containing 1	20411	Sorbs1	19 C3|19 34.25 cM	protein-coding	+1s	22.1269	22.7855	22.5336	23.715	23.2039	21.2835	22.053	21.8393	23.7639	21.9715
1219	181	O88935_ASTAAPVASPAAPSPGSSGGGGFFSSLSNAVK_2xPhospho [S14(80.9); S/T]_2xPhospho [S2(51.1); T3(51.1); S9(8.6); S14(80.9); S17(7.5); S18(0.8); S25(0); S26(0); S28(0)]	O88935	Syn1	5	5	20.8434	21.6695	21.2565	0.204274	0.564044	-1.77291	6Mo-KO_1Way down vs WT	-4.60879	1.46627	-0.82612	O88935	ASTAAPVASPAAPSPGSSGGGGFFSSLSNAVK	2xPhospho [S14(80.9); S/T]	2xPhospho [S2(51.1); T3(51.1); S9(8.6); S14(80.9); S17(7.5); S18(0.8); S25(0); S26(0); S28(0)]	NP_001104250	0.00535271	0.000644898	Syn1	synapsin I	20964	Syn1	X A1.3|X 16.37 cM	protein-coding	-2s	21.8508	20.0638	21.0619	21.6706	19.5697	22.2628	21.2918	21.9997	22.4954	20.2977
1027	182	E9PUK6_KPPAPPSPVQSQSPSTNWSPAVPAK_2xPhospho [S7(99.8); S/T]_2xPhospho [S7(99.8); S11(72.9); S13(17.4); S15(4.4); T16(4.4); S19(1.1)]	E9PUK6	Srrm1	5	5	22.5302	21.8225	22.1763	0.204375	1.63327	1.63327	6Mo-KO_1Way up vs WT	-1.38831	3.70341	0.70776	E9PUK6	KPPAPPSPVQSQSPSTNWSPAVPAK	2xPhospho [S7(99.8); S/T]	2xPhospho [S7(99.8); S11(72.9); S13(17.4); S15(4.4); T16(4.4); S19(1.1)]	NP_058079	0.00985006	0.000644898	Srrm1	serine/arginine repetitive matrix 1	51796	Srrm1	4|4 D3	protein-coding	+1s	22.8608	22.9131	21.9966	22.0865	22.7942	20.9937	22.916	22.5656	22.1836	20.4535
416	183	Q61584_AINGPTSASGDEIPK_1xPhospho [S9(100)]_1xPhospho [T6(0); S7(0); S9(100)]	Q61584	Fxr1	5	5	21.0047	21.5643	21.2845	0.207258	0.6785	-1.47384	6Mo-KO_1Way down vs WT	-2.82843	1.3021	-0.55958	Q61584	AINGPTSASGDEIPK	1xPhospho [S9(100)]	1xPhospho [T6(0); S7(0); S9(100)]	NP_001106659	0.000166042	0.000420153	Fxr1	fragile X mental retardation gene 1, autosomal homolog	14359	Fxr1	3|3 A3	protein-coding	-1s	20.0998	21.2619	21.1761	21.7776	20.7082	21.2249	21.9924	21.3637	22.4514	20.7891
1352	184	A2ASS6_RSLGDMSDEELLLPIDDYLAMK_2xOxidation [M6; M21]; 2xPhospho [S2(100); S7(100)]_2xOxidation [M6; M21]; 2xPhospho [S2(100); S7(100); Y18(0)]	A2ASS6	---	5	5	21.26	20.0617	20.6608	0.20747	2.29456	2.29456	6Mo-KO_1Way up vs WT	-1.76117	9.27258	1.19822	A2ASS6	RSLGDMSDEELLLPIDDYLAMK	2xOxidation [M6; M21]; 2xPhospho [S2(100); S7(100)]	2xOxidation [M6; M21]; 2xPhospho [S2(100); S7(100); Y18(0)]	---	0.0668741	0.00288454	Ttn	titin	22138	Ttn	2 C3|2 45.13 cM	protein-coding	+2s	21.9672	20.7082	20.922	20.2264	22.476	20.5478	17.9129	22.5883	19.321	19.9387
349	185	E9Q3M3_GSDGAASSYQLKQLEEQNAR_1xDeamidated [Q10]; 1xPhospho [S2(99.3)]_1xDeamidated [Q10; Q13]; 1xPhospho [S2(99.3); S7(0.3); S8(0.3); Y9(0.1)]	E9Q3M3	Dctn1	5	5	23.0058	23.5653	23.2856	0.208218	0.678528	-1.47378	6Mo-KO_1Way down vs WT	-2.83243	1.30405	-0.55952	E9Q3M3	GSDGAASSYQLKQLEEQNAR	1xDeamidated [Q10]; 1xPhospho [S2(99.3)]	1xDeamidated [Q10; Q13]; 1xPhospho [S2(99.3); S7(0.3); S8(0.3); Y9(0.1)]	NP_001185795	0.127692	0.00631624	Dctn1	dynactin 1	13191	Dctn1	6 C3|6 35.94 cM	protein-coding	-1s	23.5872	23.5588	23.1582	21.6027	23.1221	24.0516	22.9895	23.4976	23.8751	23.4128
1356	186	A2ASS6_RTPSPDYDLYYYR_2xPhospho [T2(100); S4(100)]_2xPhospho [T2(100); S4(100); Y7(0); Y10(0); Y11(0); Y12(0)]	A2ASS6	---	5	5	27.35	27.068	27.209	0.209889	1.21585	1.21585	6Mo-KO_1Way up vs WT	-1.14468	1.69215	0.28196	A2ASS6	RTPSPDYDLYYYR	2xPhospho [T2(100); S4(100)]	2xPhospho [T2(100); S4(100); Y7(0); Y10(0); Y11(0); Y12(0)]	---	3.13449e-05	0.000420153	Ttn	titin	22138	Ttn	2 C3|2 45.13 cM	protein-coding	+0.5s	27.3868	26.9601	27.1547	27.668	27.5803	27.3498	27.3733	27.2216	26.5576	26.8378
466	187	O08582_SRSPVDSPVPASMFAPEPSSPGAAR_1xOxidation [M13]; 2xPhospho [S20(96.4); S]_1xOxidation [M13]; 2xPhospho [S1(50); S3(50); S7(0); S12(0); S19(3.6); S20(96.4)]	O08582	Gtpbp1	5	5	25.1651	24.8826	25.0238	0.210714	1.2163	1.2163	6Mo-KO_1Way up vs WT	-1.14573	1.69498	0.2825	O08582	SRSPVDSPVPASMFAPEPSSPGAAR	1xOxidation [M13]; 2xPhospho [S20(96.4); S]	1xOxidation [M13]; 2xPhospho [S1(50); S3(50); S7(0); S12(0); S19(3.6); S20(96.4)]	NP_038846	0.00185308	0.000420153	Gtpbp1	GTP binding protein 1	14904	Gtpbp1	15|15 E1	protein-coding	+0.5s	25.1007	24.8574	25.0711	25.3319	25.4646	25.3579	25.191	24.8887	24.5333	24.4423
1470	188	O70373_LGSRPSIQEQSPLELR_2xPhospho [S3(100); S6(100)]_2xPhospho [S3(100); S6(100); S11(0)]	O70373	---	5	5	25.1704	25.528	25.3492	0.211968	0.780483	-1.28126	6Mo-KO_1Way down vs WT	-1.95258	1.18942	-0.35756	O70373	LGSRPSIQEQSPLELR	2xPhospho [S3(100); S6(100)]	2xPhospho [S3(100); S6(100); S11(0)]	---	2.28395e-05	0.000420153	Xirp1	xin actin-binding repeat containing 1	22437	Xirp1	9|9 F4	protein-coding	-0.5s	25.1757	25.3704	25.3319	25.2871	24.6871	25.6608	26.0879	25.6718	25.5425	24.677
1231	189	Q8BWB1_AGGAESGPEEDALSLGAEACNFMQPLGGR_1xCarbamidomethyl [C20]; 2xPhospho [S6(100); S14(100)]_1xCarbamidomethyl [C20]; 2xPhospho [S6(100); S14(100)]	Q8BWB1	Synpo2l	5	5	22.7749	23.8249	23.2999	0.212216	0.482955	-2.07059	6Mo-KO_1Way down vs WT	-7.14086	1.66557	-1.05004	Q8BWB1	AGGAESGPEEDALSLGAEACNFMQPLGGR	1xCarbamidomethyl [C20]; 2xPhospho [S6(100); S14(100)]	1xCarbamidomethyl [C20]; 2xPhospho [S6(100); S14(100)]	NP_001297361	0.0600224	0.00288454	Synpo2l	synaptopodin 2-like	68760	Synpo2l	14|14 A3	protein-coding	-2s	24.5638	23.3306	23.5991	21.5705	20.8103	24.2745	23.168	24.9127	23.0008	23.7685
1305	190	Q569Z6_WAHDKFSGEEGEIEDDESGTENREEK_2xPhospho [S7(100); S18(95.6)]_2xPhospho [S7(100); S18(95.6); T20(4.4)]	Q569Z6	Thrap3	5	5	22.9908	21.8363	22.4136	0.212556	2.22604	2.22604	6Mo-KO_1Way up vs WT	-1.75423	8.69268	1.15448	Q569Z6	WAHDKFSGEEGEIEDDESGTENREEK	2xPhospho [S7(100); S18(95.6)]	2xPhospho [S7(100); S18(95.6); T20(4.4)]	NP_666265	0.00430593	0.000644898	Thrap3	thyroid hormone receptor associated protein 3	230753	Thrap3	4|4 D2.2	protein-coding	+2s	23.2722	23.1295	23.336	21.7197	23.4964	22.7284	18.7393	22.5136	23.0613	22.1388
156	191	Q8BFZ3; P60710; P68033_SYELPDGQVITIGNER_1xPhospho [S1(100)]_1xPhospho [S1(100); Y2(0); T11(0)]	Q8BFZ3; P60710; P68033	---	5	5	18.9556	17.3653	18.1605	0.213511	3.01112	3.01112	6Mo-KO_1Way up vs WT	-2.17828	19.7501	1.5903	Q8BFZ3; P60710; P68033	SYELPDGQVITIGNER	1xPhospho [S1(100)]	1xPhospho [S1(100); Y2(0); T11(0)]	---	0.131012	0.00686468	Actbl2	actin, beta-like 2	238880	Actbl2	13|13 D2.2	protein-coding	+3s	17.324	18.616	19.2065	20.4571	19.1746	17.0424	17.6283	14.0266	20.716	17.4134
238	192	O54724_ESEALPEKEGDELGEGERPEDDTAAIELSSDEAVEVEEVIEESR_1xPhospho [S/T]_1xPhospho [S2(0.1); T23(1); S29(49.5); S30(49.5); S43(0)]	O54724	Cavin1	5	5	18.926	20.1225	19.5242	0.213662	0.436333	-2.29183	6Mo-KO_1Way down vs WT	-9.4401	1.79726	-1.1965	O54724	ESEALPEKEGDELGEGERPEDDTAAIELSSDEAVEVEEVIEESR	1xPhospho [S/T]	1xPhospho [S2(0.1); T23(1); S29(49.5); S30(49.5); S43(0)]	NP_033012	0.00598865	0.000644898	Cavin1	caveolae associated 1	19285	Cavin1	11 D|11 63.95 cM	protein-coding	-2s	18.616	18.2921	21.1061	18.2921	18.3235	18.2553	20.499	18.7393	21.5843	21.5344
1068	193	Q8BTI8_SSSPVTELTARSPVK_2xPhospho [S3(98.3); S12(100)]_2xPhospho [S1(0.9); S2(0.9); S3(98.3); T6(0); T9(0); S12(100)]	Q8BTI8	Srrm2	5	5	24.0981	23.8222	23.9601	0.214127	1.21072	1.21072	6Mo-KO_1Way up vs WT	-1.14515	1.67859	0.27586	Q8BTI8	SSSPVTELTARSPVK	2xPhospho [S3(98.3); S12(100)]	2xPhospho [S1(0.9); S2(0.9); S3(98.3); T6(0); T9(0); S12(100)]	NP_780438	0.000304047	0.000420153	Srrm2	serine/arginine repetitive matrix 2	75956	Srrm2	17|17 A3.3	protein-coding	+0.5s	24.2138	23.6105	23.9408	24.3601	24.3652	23.9861	23.8328	23.9177	24.104	23.2705
607	194	A2AJI1_SRGPTPTATGPR_2xPhospho [S1(100); T5(99.9)]_2xPhospho [S1(100); T5(99.9); T7(0.1); T9(0)]	A2AJI1	Map7d1	5	5	24.3796	24.595	24.4873	0.217211	0.861343	-1.16098	6Mo-KO_1Way down vs WT	-1.50114	1.11371	-0.21534	A2AJI1	SRGPTPTATGPR	2xPhospho [S1(100); T5(99.9)]	2xPhospho [S1(100); T5(99.9); T7(0.1); T9(0)]	NP_001139442	0.00054511	0.000420153	Map7d1	MAP7 domain containing 1	245877	Map7d1	4|4 D2.2	protein-coding	-0.5s	24.6025	24.4297	24.4815	24.1849	24.1996	24.7592	24.2688	25.0442	24.5129	24.3898
564	195	A0A2I3BQ16_ENSPSVSPTANITAPFGLKPR_2xPhospho [S3(97.1); T9(100)]_2xPhospho [S3(97.1); S5(2.8); S7(0.1); T9(100); T13(0)]	A0A2I3BQ16	---	5	5	21.7287	22.378	22.0533	0.217879	0.63759	-1.56841	6Mo-KO_1Way down vs WT	-3.4079	1.38538	-0.6493	A0A2I3BQ16	ENSPSVSPTANITAPFGLKPR	2xPhospho [S3(97.1); T9(100)]	2xPhospho [S3(97.1); S5(2.8); S7(0.1); T9(100); T13(0)]	---	0.0256105	0.00132202	Lrch1	leucine-rich repeats and calponin homology (CH) domain containing 1	380916	Lrch1	14|14 D3	protein-coding	-1s	21.4704	21.5454	21.5884	21.6299	22.4092	22.8009	23.963	21.4693	21.8146	21.842
584	196	F6TFN2_ATFSSMSGLDSVSDSGEGRGSPLR_2xPhospho [S13(97.3); S15(97.4)]_2xPhospho [T2(0); S4(0); S5(0); S7(0); S11(2.6); S13(97.3); S15(97.4); S21(2.7)]	F6TFN2	---	5	5	23.5859	23.9688	23.7773	0.218132	0.766863	-1.30401	6Mo-KO_1Way down vs WT	-2.0615	1.21233	-0.38296	F6TFN2	ATFSSMSGLDSVSDSGEGRGSPLR	2xPhospho [S13(97.3); S15(97.4)]	2xPhospho [T2(0); S4(0); S5(0); S7(0); S11(2.6); S13(97.3); S15(97.4); S21(2.7)]	---	0.0616698	0.00288454	Lmo7	LIM domain only 7	380928	Lmo7	14 E2.3|14 50.9 cM	protein-coding	-0.5s	24.0831	22.5567	23.8319	23.7341	23.7236	24.104	23.9302	24.09	23.5634	24.1566
1199	197	A0A087WSE3_SSSFSQGEAEPR_1xPhospho [S3(100)]_1xPhospho [S1(0); S2(0); S3(100); S5(0)]	A0A087WSE3	---	5	5	23.5782	23.2443	23.4112	0.218167	1.26042	1.26042	6Mo-KO_1Way up vs WT	-1.18283	1.8791	0.3339	A0A087WSE3	SSSFSQGEAEPR	1xPhospho [S3(100)]	1xPhospho [S1(0); S2(0); S3(100); S5(0)]	---	0.000383485	0.000420153	Speg	SPEG complex locus	11790	Speg	1 C4|1 38.88 cM	protein-coding	+0.5s	23.4417	23.6885	23.3777	24.0901	23.2929	23.3093	23.2017	23.1323	23.926	22.6521
319	198	P50462_GIGFGQGAGCLSTDTGEHLGLQFQQSPKPAR_1xCarbamidomethyl [C10]; 1xPhospho [S26(100)]_1xCarbamidomethyl [C10]; 1xPhospho [S12(0); T13(0); T15(0); S26(100)]	P50462	Csrp3	5	5	21.8333	22.9279	22.3806	0.218434	0.468259	-2.13557	6Mo-KO_1Way down vs WT	-7.91495	1.73549	-1.09462	P50462	GIGFGQGAGCLSTDTGEHLGLQFQQSPKPAR	1xCarbamidomethyl [C10]; 1xPhospho [S26(100)]	1xCarbamidomethyl [C10]; 1xPhospho [S12(0); T13(0); T15(0); S26(100)]	NP_001185770	0.0366892	0.00237867	Csrp3	cysteine and glycine-rich protein 3	13009	Csrp3	7|7 B4	protein-coding	-2s	21.3265	23.0748	21.5321	21.8408	21.3923	24.6613	20.1802	22.72	23.5944	23.4837
422	199	Q9DB70_NPPPQDYESDDESYEVLDLTEYAR_1xPhospho [S9(80.7)]_1xPhospho [Y7(0.3); S9(80.7); S13(17.9); Y14(1.1); T20(0); Y22(0)]	Q9DB70	Fundc1	5	5	21.7588	20.8094	21.2841	0.218598	1.93102	1.93102	6Mo-KO_1Way up vs WT	-1.61377	6.01748	0.94936	Q9DB70	NPPPQDYESDDESYEVLDLTEYAR	1xPhospho [S9(80.7)]	1xPhospho [Y7(0.3); S9(80.7); S13(17.9); Y14(1.1); T20(0); Y22(0)]	NP_001300674	0.15162	0.00912834	Fundc1	FUN14 domain containing 1	72018	Fundc1	X|X A1.2	protein-coding	+2s	21.0385	21.2001	22.3101	21.2957	22.9495	20.6014	19.8075	19.5003	22.9093	21.2286
911	200	B2KF52_LSQSSVNLSPSSPANNLSVVTYSK_1xDeamidated [N/Q]; 3xPhospho [S2(99.2); S23(90.1); S/Y/T]_1xDeamidated [Q3; N7; N15; N16]; 3xPhospho [S2(99.2); S4(50.3); S5(50.3); S9(0.1); S11(0.1); S12(0.1); S18(0); T21(4.9); Y22(5); S23(90.1)]	B2KF52	---	5	5	27.0861	27.5244	27.3053	0.219659	0.738004	-1.35501	6Mo-KO_1Way down vs WT	-2.29308	1.24892	-0.4383	B2KF52	LSQSSVNLSPSSPANNLSVVTYSK	1xDeamidated [N/Q]; 3xPhospho [S2(99.2); S23(90.1); S/Y/T]	1xDeamidated [Q3; N7; N15; N16]; 3xPhospho [S2(99.2); S4(50.3); S5(50.3); S9(0.1); S11(0.1); S12(0.1); S18(0); T21(4.9); Y22(5); S23(90.1)]	---	0.129342	0.00669678	Ilrun	inflammation and lipid regulator with UBA-like and NBR1-like domains	224647	Ilrun	17 A3.3|17 14.59 cM	protein-coding	-1s	27.668	27.2365	27.3015	26.5522	26.6721	28.1444	27.7465	27.3895	26.6228	27.7186
1331	201	A2ASS6_KLSETVEETEGNSFK_1xPhospho [S3(100)]_1xPhospho [S3(100); T5(0); T9(0); S13(0)]	A2ASS6	---	5	5	26.1762	25.7723	25.9743	0.220698	1.3231	1.3231	6Mo-KO_1Way up vs WT	-1.22882	2.15115	0.40392	A2ASS6	KLSETVEETEGNSFK	1xPhospho [S3(100)]	1xPhospho [S3(100); T5(0); T9(0); S13(0)]	---	0.00042317	0.000420153	Ttn	titin	22138	Ttn	2 C3|2 45.13 cM	protein-coding	+1s	25.9103	26.1868	25.9103	26.6138	26.2599	25.2992	25.8039	25.6841	26.7909	25.2834
1359	202	A2ASS6_TASPHFTVSK_1xPhospho [S3(100)]_1xPhospho [T1(0); S3(100); T7(0); S9(0)]	A2ASS6	---	5	5	25.8392	25.5075	25.6733	0.220892	1.25846	1.25846	6Mo-KO_1Way up vs WT	-1.18456	1.87602	0.33166	A2ASS6	TASPHFTVSK	1xPhospho [S3(100)]	1xPhospho [T1(0); S3(100); T7(0); S9(0)]	---	0.000199364	0.000420153	Ttn	titin	22138	Ttn	2 C3|2 45.13 cM	protein-coding	+0.5s	25.0242	26.0485	25.7425	26.0711	26.3097	25.1973	25.4807	25.4153	25.5523	25.8921
1266	203	Q8BH40_VSGGFPEDSSK_1xPhospho [S2(100)]_1xPhospho [S2(100); S9(0); S10(0)]	Q8BH40	Stx7	5	5	21.7195	21.1903	21.4549	0.220956	1.44311	1.44311	6Mo-KO_1Way up vs WT	-1.31041	2.72902	0.52918	Q8BH40	VSGGFPEDSSK	1xPhospho [S2(100)]	1xPhospho [S2(100); S9(0); S10(0)]	NP_058077	0.0608408	0.00288454	Stx7	syntaxin 7	53331	Stx7	10|10 A4	protein-coding	+1s	20.8141	21.3614	21.5746	22.062	22.7855	20.9378	21.4211	20.7096	21.9319	20.9513
1168	204	Q62261_GDQVSQNGLPAEQGSPR_1xDeamidated [N/Q]; 1xPhospho [S15(100)]_1xDeamidated [Q6; N7; Q13]; 1xPhospho [S5(0); S15(100)]	Q62261	Sptbn1	5	5	24.1347	23.5533	23.844	0.221229	1.4963	1.4963	6Mo-KO_1Way up vs WT	-1.34646	3.0146	0.5814	Q62261	GDQVSQNGLPAEQGSPR	1xDeamidated [N/Q]; 1xPhospho [S15(100)]	1xDeamidated [Q6; N7; Q13]; 1xPhospho [S5(0); S15(100)]	NP_033286	0.00252466	0.000420153	Sptbn1	spectrin beta, non-erythrocytic 1	20742	Sptbn1	11 A3.3|11 17.44 cM	protein-coding	+1s	23.4222	24.5085	24.0901	24.6975	23.955	23.2251	23.0671	23.2449	25.0562	23.173
1160	205	P15508_TSPVSFMSR_1xPhospho [S2(99.9)]_1xPhospho [T1(0.1); S2(99.9); S5(0); S8(0)]	P15508	---	5	5	22.6072	21.4619	22.0345	0.223852	2.21186	2.21186	6Mo-KO_1Way up vs WT	-1.81234	8.86657	1.14526	P15508	TSPVSFMSR	1xPhospho [S2(99.9)]	1xPhospho [T1(0.1); S2(99.9); S5(0); S8(0)]	---	0.0216791	0.00109972	Sptb	spectrin beta, erythrocytic	20741	Sptb	12 C3|12 33.73 cM	protein-coding	+2s	20.3854	23.0863	22.3135	23.3208	23.9299	23.4242	22.3231	20.13	20.9416	20.4907
390	206	Q3UQN2_LSGINEIPRPFSPPVTSNTSPPPTAPLAR_2xPhospho [T19(96.5); S20(98.7)]_2xPhospho [S2(0); S12(0); T16(2.4); S17(2.4); T19(96.5); S20(98.7); T24(0)]	Q3UQN2	Fcho2	5	5	22.9675	22.6592	22.8133	0.224336	1.23826	1.23826	6Mo-KO_1Way up vs WT	-1.17411	1.80026	0.30832	Q3UQN2	LSGINEIPRPFSPPVTSNTSPPPTAPLAR	2xPhospho [T19(96.5); S20(98.7)]	2xPhospho [S2(0); S12(0); T16(2.4); S17(2.4); T19(96.5); S20(98.7); T24(0)]	NP_766179	0.0340097	0.00203657	Fcho2	FCH domain only 2	218503	Fcho2	13|13 D1	protein-coding	+0.5s	23.4876	22.4317	22.5407	23.0776	23.3	22.5371	22.8798	22.7006	22.871	22.3075
1316	207	A2ASS6_SPPRFELSSLR_1xPhospho [S1(100)]_1xPhospho [S1(100); S8(0); S9(0)]	A2ASS6	---	5	5	24.9994	24.526	24.7627	0.225201	1.38842	1.38842	6Mo-KO_1Way up vs WT	-1.28101	2.46941	0.47344	A2ASS6	SPPRFELSSLR	1xPhospho [S1(100)]	1xPhospho [S1(100); S8(0); S9(0)]	---	0.002845	0.000420153	Ttn	titin	22138	Ttn	2 C3|2 45.13 cM	protein-coding	+1s	24.5782	24.6099	24.3048	25.594	25.9103	24.1936	25.1726	24.3039	24.5761	24.3838
491	208	Q8BG05_SSGSPYGGGYGSGGGSGGYGSR_1xPhospho [S4(99)]_1xPhospho [S1(0.1); S2(0.9); S4(99); Y6(0); Y10(0); S12(0); S16(0); Y19(0); S21(0)]	Q8BG05	Hnrnpa3	5	5	24.1867	23.6893	23.938	0.225398	1.41167	1.41167	6Mo-KO_1Way up vs WT	-1.29754	2.58574	0.4974	Q8BG05	SSGSPYGGGYGSGGGSGGYGSR	1xPhospho [S4(99)]	1xPhospho [S1(0.1); S2(0.9); S4(99); Y6(0); Y10(0); S12(0); S16(0); Y19(0); S21(0)]	NP_444493	3.402e-07	0.000420153	Hnrnpa3	heterogeneous nuclear ribonucleoprotein A3	229279	Hnrnpa3	2|2 C3	protein-coding	+1s	23.9299	24.1604	23.6105	24.9279	24.3048	23.1479	23.926	23.3225	24.7985	23.2516
500	209	G5E8J6_SHSHEDEDGIVSSEYHR_1xPhospho [S3(92.3)]_1xPhospho [S1(7.8); S3(92.3); S12(0); S13(0); Y15(0)]	G5E8J6	Hrc	5	5	22.4819	22.1938	22.3378	0.227137	1.2211	1.2211	6Mo-KO_1Way up vs WT	-1.16457	1.73647	0.28818	G5E8J6	SHSHEDEDGIVSSEYHR	1xPhospho [S3(92.3)]	1xPhospho [S1(7.8); S3(92.3); S12(0); S13(0); Y15(0)]	NP_034603	4.27161e-05	0.000420153	Hrc	histidine rich calcium binding protein	15464	Hrc	7 B3|7 29.26 cM	protein-coding	+0.5s	22.671	22.8146	22.4726	22.3135	22.138	22.1708	21.6469	22.7391	22.0059	22.4061
240	210	O54724_ATEEPSGTGSDELIKSDQVNGVLVLSLLDK_1xDeamidated [Q/N]; 1xPhospho [T2(98.4)]_1xDeamidated [Q18; N20]; 1xPhospho [T2(98.4); S6(1.2); T8(0.3); S10(0.1); S16(0); S26(0)]	O54724	Cavin1	5	5	22.269	21.717	21.993	0.228504	1.46618	1.46618	6Mo-KO_1Way up vs WT	-1.34184	2.88453	0.55206	O54724	ATEEPSGTGSDELIKSDQVNGVLVLSLLDK	1xDeamidated [Q/N]; 1xPhospho [T2(98.4)]	1xDeamidated [Q18; N20]; 1xPhospho [T2(98.4); S6(1.2); T8(0.3); S10(0.1); S16(0); S26(0)]	NP_033012	0.00455471	0.000644898	Cavin1	caveolae associated 1	19285	Cavin1	11 D|11 63.95 cM	protein-coding	+1s	22.3894	22.3646	21.594	22.68	22.3171	21.0557	22.6054	21.3137	22.6795	20.9305
793	211	Q61937_CGSGPVHISGQHLVAVEEDAESEDEDEEDVK_1xCarbamidomethyl [C1]; 1xPhospho [S22(100)]_1xCarbamidomethyl [C1]; 1xPhospho [S3(0); S9(0); S22(100)]	Q61937	Npm1	5	5	24.2541	22.9367	23.5954	0.22896	2.4921	2.4921	6Mo-KO_1Way up vs WT	-2.02062	12.5491	1.31736	Q61937	CGSGPVHISGQHLVAVEEDAESEDEDEEDVK	1xCarbamidomethyl [C1]; 1xPhospho [S22(100)]	1xCarbamidomethyl [C1]; 1xPhospho [S3(0); S9(0); S22(100)]	NP_032748	0.0153019	0.00109972	Npm1	nucleophosmin 1	18148	Npm1	11|11 A4	protein-coding	+2s	24.1041	24.7914	24.2795	22.782	25.3134	23.262	19.3647	23.6009	23.9008	24.5552
580	212	F6TFN2_LAPSPSEEPR_1xPhospho [S4(99.4)]_1xPhospho [S4(99.4); S6(0.6)]	F6TFN2	---	5	5	23.4352	23.1208	23.278	0.229334	1.24351	1.24351	6Mo-KO_1Way up vs WT	-1.1832	1.82961	0.31442	F6TFN2	LAPSPSEEPR	1xPhospho [S4(99.4)]	1xPhospho [S4(99.4); S6(0.6)]	---	0.00957802	0.000644898	Lmo7	LIM domain only 7	380928	Lmo7	14 E2.3|14 50.9 cM	protein-coding	+0.5s	22.8802	23.6394	23.5453	23.842	23.2693	23.004	22.7934	22.9973	23.8017	23.0077
1268	213	A0A1L1SRI1_LDEGTPPEPK_1xPhospho [T5(100)]_1xPhospho [T5(100)]	A0A1L1SRI1	---	5	5	23.4313	23.1183	23.2748	0.229579	1.24227	1.24227	6Mo-KO_1Way up vs WT	-1.18255	1.82496	0.31298	A0A1L1SRI1	LDEGTPPEPK	1xPhospho [T5(100)]	1xPhospho [T5(100)]	---	0.0155171	0.00109972	Tln2	talin 2	70549	Tln2	9|9 C	protein-coding	+0.5s	22.8783	23.6348	23.5403	23.8377	23.2653	23.0077	22.7913	22.9932	23.7953	23.004
1114	214	Q9JIS8_LESLYSDEEEESVAGADK_1xPhospho [S/Y]_1xPhospho [S3(49.3); Y5(0); S6(49.3); S12(1.3)]	Q9JIS8	Slc12a4	5	5	21.2045	20.5537	20.8791	0.231373	1.57008	1.57008	6Mo-KO_1Way up vs WT	-1.422	3.50546	0.65084	Q9JIS8	LESLYSDEEEESVAGADK	1xPhospho [S/Y]	1xPhospho [S3(49.3); Y5(0); S6(49.3); S12(1.3)]	NP_033221	0.00131304	0.000420153	Slc12a4	solute carrier family 12, member 4	20498	Slc12a4	8 D3|8 53.06 cM	protein-coding	+1s	20.821	21.387	21.1266	20.5202	22.1677	20.4955	19.0832	20.7209	21.6511	20.8176
44	215	F8VQ52_ANSMEGLMPR_1xPhospho [S3(100)]_1xPhospho [S3(100)]	F8VQ52	Adcy6	5	5	21.0241	20.5544	20.7892	0.231744	1.38484	1.38484	6Mo-KO_1Way up vs WT	-1.28994	2.47383	0.46972	F8VQ52	ANSMEGLMPR	1xPhospho [S3(100)]	1xPhospho [S3(100)]	NP_031431	0.00471742	0.000644898	Adcy6	adenylate cyclase 6	11512	Adcy6	15|15 F1	protein-coding	+1s	20.5297	20.4571	21.4171	21.4123	21.3045	20.3936	20.6014	20.4744	21.5547	19.748
632	216	A0A0A0MQC7_TDHGAEIVYKSPVVSGDTSPR_2xPhospho [S11(100); T/S/Y]_2xPhospho [T1(0); Y9(0); S11(100); S15(6.9); T18(46.6); S19(46.6)]	A0A0A0MQC7	---	5	5	24.1965	24.6247	24.4106	0.231907	0.743188	-1.34555	6Mo-KO_1Way down vs WT	-2.28395	1.26149	-0.4282	A0A0A0MQC7	TDHGAEIVYKSPVVSGDTSPR	2xPhospho [S11(100); T/S/Y]	2xPhospho [T1(0); Y9(0); S11(100); S15(6.9); T18(46.6); S19(46.6)]	---	0.00506046	0.000644898	Mapt	microtubule-associated protein tau	17762	Mapt	11 67.79 cM|11 E1	protein-coding	-1s	24.4712	24.4128	24.6632	24.4213	23.014	25.1409	24.3898	24.6949	24.3646	24.5333
7	217	Q91UZ1_ANVTPQSSSELRPTTTAALGSGQEAK_2xPhospho [T4(100); S/T]_2xPhospho [T4(100); S7(72.6); S8(13.7); S9(13.7); T14(0); T15(0); T16(0); S21(0)]	Q91UZ1	Plcb4	5	5	22.209	22.1085	22.1588	0.232972	1.07216	1.07216	6Mo-KO_1Way up vs WT	-1.05637	1.21433	0.10052	Q91UZ1	ANVTPQSSSELRPTTTAALGSGQEAK	2xPhospho [T4(100); S/T]	2xPhospho [T4(100); S7(72.6); S8(13.7); S9(13.7); T14(0); T15(0); T16(0); S21(0)]	NP_038857	0.0010633	0.000420153	Plcb4	phospholipase C, beta 4	18798	Plcb4	2 F3|2 66.64 cM	protein-coding	+0.5s	22.2872	22.1677	22.2766	22.3171	21.9966	21.9768	22.1767	22.2522	22.0122	22.1247
1398	218	P70399_GSGEKPASAPVDDTESLHSQGEEEFEMPQPPHGHVLHR_2xPhospho [T14(89.8); S]_2xPhospho [S2(2.2); S8(3.2); T14(89.8); S16(52.4); S19(52.4)]	P70399	Trp53bp1	5	5	19.1294	20.058	19.5937	0.233526	0.525361	-1.90345	6Mo-KO_1Way down vs WT	-6.02236	1.66219	-0.92862	P70399	GSGEKPASAPVDDTESLHSQGEEEFEMPQPPHGHVLHR	2xPhospho [T14(89.8); S]	2xPhospho [S2(2.2); S8(3.2); T14(89.8); S16(52.4); S19(52.4)]	NP_001277759	0.123647	0.00595432	Trp53bp1	transformation related protein 53 binding protein 1	27223	Trp53bp1	2|2 E5	protein-coding	-2s	18.9299	18.7185	18.8676	18.185	20.9458	21.8706	20.0674	19.3034	18.6605	20.388
364	219	E9QP49_SSVNGEAGPVPPPR_1xDeamidated [N4]; 1xPhospho [S]_1xDeamidated [N4]; 1xPhospho [S1(50); S2(50)]	E9QP49	Ehbp1l1	5	5	20.0387	20.5516	20.2951	0.234117	0.700783	-1.42697	6Mo-KO_1Way down vs WT	-2.69847	1.32521	-0.51296	E9QP49	SSVNGEAGPVPPPR	1xDeamidated [N4]; 1xPhospho [S]	1xDeamidated [N4]; 1xPhospho [S1(50); S2(50)]	NP_001108069	0.00542836	0.000644898	Ehbp1l1	EH domain binding protein 1-like 1	114601	Ehbp1l1	19|19 A	protein-coding	-1s	19.7244	19.9911	19.4414	21.3297	19.7068	20.3698	20.7827	20.6657	21.1143	19.8257
753	220	A0A0G2JEX1_KREDEEEEEGSIVNGSTTEDEEQTR_2xPhospho [S11(100); S16(91.6)]_2xPhospho [S11(100); S16(91.6); T17(4.2); T18(4.2); T24(0)]	A0A0G2JEX1	---	5	5	20.7634	21.9903	21.3769	0.235311	0.427223	-2.3407	6Mo-KO_1Way down vs WT	-10.7903	1.96944	-1.22694	A0A0G2JEX1	KREDEEEEEGSIVNGSTTEDEEQTR	2xPhospho [S11(100); S16(91.6)]	2xPhospho [S11(100); S16(91.6); T17(4.2); T18(4.2); T24(0)]	---	0.0261488	0.00132202	Nexn	nexilin	68810	Nexn	3|3 H3	protein-coding	-2s	21.7509	18.5395	22.0821	19.4075	22.037	22.5698	22.8818	22.4344	19.6186	22.4471
760	221	P70313_QGPASPAPEPSQAPAPPSPTRPAPDHSPPLTRPPDGPR_2xPhospho [S18(92.9); S/T]_2xPhospho [S5(0.8); S11(1.8); S18(92.9); T20(4.6); S27(74.1); T31(25.8)]	P70313	Nos3	5	5	23.9307	23.3698	23.6502	0.237167	1.47517	1.47517	6Mo-KO_1Way up vs WT	-1.36733	2.97548	0.56088	P70313	QGPASPAPEPSQAPAPPSPTRPAPDHSPPLTRPPDGPR	2xPhospho [S18(92.9); S/T]	2xPhospho [S5(0.8); S11(1.8); S18(92.9); T20(4.6); S27(74.1); T31(25.8)]	NP_032739	0.0460216	0.00237867	Nos3	nitric oxide synthase 3, endothelial cell	18127	Nos3	5 A3|5 11.32 cM	protein-coding	+1s	24.1189	23.7021	23.6441	23.8488	24.3397	22.1388	23.8797	23.5367	24.5282	22.7658
1176	222	Q8BVY4_SSPDSPENTPPPTPTAPSSGSQHSGR_2xPhospho [S1(94.1); S2(88.8)]_2xPhospho [S1(94.1); S2(88.8); S5(8.9); T9(5.5); T13(2); T15(0.7); S18(0); S19(0); S21(0); S24(0)]	Q8BVY4	Supt3	5	5	21.1181	21.7487	21.4334	0.237526	0.64589	-1.54825	6Mo-KO_1Way down vs WT	-3.40992	1.42253	-0.63064	Q8BVY4	SSPDSPENTPPPTPTAPSSGSQHSGR	2xPhospho [S1(94.1); S2(88.8)]	2xPhospho [S1(94.1); S2(88.8); S5(8.9); T9(5.5); T13(2); T15(0.7); S18(0); S19(0); S21(0); S24(0)]	NP_848767	0.0724936	0.00329599	Supt3	SPT3, SAGA and STAGA complex component	109115	Supt3	17|17 B3	protein-coding	-1s	20.3524	21.3082	21.0414	21.2619	21.6265	21.1467	23.2117	20.6098	21.6287	22.1467
814	223	Q9JHU2_VISPGPNFQER_1xPhospho [S3(100)]_1xPhospho [S3(100)]	Q9JHU2	Palmd	5	5	22.63	22.0639	22.3469	0.239002	1.48054	1.48054	6Mo-KO_1Way up vs WT	-1.37551	3.01509	0.56612	Q9JHU2	VISPGPNFQER	1xPhospho [S3(100)]	1xPhospho [S3(100)]	NP_075734	0.00222466	0.000420153	Palmd	palmdelphin	114301	Palmd	3 G1|3 50.49 cM	protein-coding	+1s	22.2971	22.8067	22.4426	23.0631	22.5407	21.5733	21.6844	22.1498	23.6576	21.2545
1308	224	Q569Z6_ASVSDLSPR_2xPhospho [S2(95.5); S7(98.8)]_2xPhospho [S2(95.5); S4(5.8); S7(98.8)]	Q569Z6	Thrap3	5	5	19.9154	20.646	20.2807	0.239114	0.60262	-1.65942	6Mo-KO_1Way down vs WT	-4.1565	1.50944	-0.73068	Q569Z6	ASVSDLSPR	2xPhospho [S2(95.5); S7(98.8)]	2xPhospho [S2(95.5); S4(5.8); S7(98.8)]	NP_666265	0.0050961	0.000644898	Thrap3	thyroid hormone receptor associated protein 3	230753	Thrap3	4|4 D2.2	protein-coding	-1s	20.1933	19.9845	20.1527	18.6645	20.5818	20.7209	22.3787	19.8559	19.748	20.5267
430	225	P23242_ASSRPRPDDLEI_1xPhospho [S3(89.9)]_1xPhospho [S2(10.1); S3(89.9)]	P23242	Gja1	5	5	25.0759	24.6386	24.8573	0.240021	1.35405	1.35405	6Mo-KO_1Way up vs WT	-1.28091	2.34848	0.43728	P23242	ASSRPRPDDLEI	1xPhospho [S3(89.9)]	1xPhospho [S2(10.1); S3(89.9)]	NP_034418	0.09778	0.00392242	Gja1	gap junction protein, alpha 1	14609	Gja1	10 B4|10 28.64 cM	protein-coding	+1s	24.5416	24.8133	24.6785	25.6562	25.6898	24.5957	24.9234	24.5199	25.2992	23.8548
455	226	Q9Z1E4_HSSPHQSEDEEEPR_1xPhospho [S3(99.9)]_1xPhospho [S2(0.1); S3(99.9); S7(0)]	Q9Z1E4	Gys1	5	5	21.2723	22.5062	21.8893	0.240346	0.425167	-2.35202	6Mo-KO_1Way down vs WT	-11.1373	2.01325	-1.2339	Q9Z1E4	HSSPHQSEDEEEPR	1xPhospho [S3(99.9)]	1xPhospho [S2(0.1); S3(99.9); S7(0)]	NP_109603	0.000568607	0.000420153	Gys1	glycogen synthase 1, muscle	14936	Gys1	7 B3|7 29.31 cM	protein-coding	-2s	20.5995	20.5102	21.5913	22.476	21.1843	19.1088	23.0508	22.9035	22.9195	24.5482
1115	227	P14142_RTPSLLEQEVKPSTELEYLGPDEND_1xPhospho [S4(88.2)]_1xPhospho [T2(11.8); S4(88.2); S13(0); T14(0); Y18(0)]	P14142	Slc2a4	5	5	28.5682	28.0911	28.3297	0.240367	1.39198	1.39198	6Mo-KO_1Way up vs WT	-1.31077	2.53977	0.47714	P14142	RTPSLLEQEVKPSTELEYLGPDEND	1xPhospho [S4(88.2)]	1xPhospho [T2(11.8); S4(88.2); S13(0); T14(0); Y18(0)]	NP_033230	0.00566178	0.000644898	Slc2a4	solute carrier family 2 (facilitated glucose transporter), member 4	20528	Slc2a4	11 B3|11 42.93 cM	protein-coding	+1s	28.3487	28.5516	28.3077	28.6003	29.0328	27.6949	28.8352	27.6064	29.0377	27.2812
196	228	Q3UZA1_AIVSPFHSPPSTPSSPGIR_3xPhospho [S4(100); S8(100); S15(97.3)]_3xPhospho [S4(100); S8(100); S11(0); T12(0); S14(2.7); S15(97.3)]	Q3UZA1	Rcsd1	5	5	21.116	20.2585	20.6872	0.241226	1.81185	1.81185	6Mo-KO_1Way up vs WT	-1.62984	5.35041	0.85746	Q3UZA1	AIVSPFHSPPSTPSSPGIR	3xPhospho [S4(100); S8(100); S15(97.3)]	3xPhospho [S4(100); S8(100); S11(0); T12(0); S14(2.7); S15(97.3)]	NP_001033935	1.21263e-05	0.000420153	Rcsd1	RCSD domain containing 1	226594	Rcsd1	1|1 H2.3	protein-coding	+2s	20.9582	21.5282	20.9548	20.2458	21.8928	21.7018	19.8863	21.3548	20.13	18.2196
1263	229	A0A140LHQ9_ELYSPSGERDDAGQVSPSSDQR_2xPhospho [S4(100); S6(100)]_2xPhospho [Y3(0.1); S4(100); S6(100); S16(0); S18(0); S19(0)]	A0A140LHQ9	---	5	5	23.2318	21.6529	22.4424	0.243352	2.98742	2.98742	6Mo-KO_1Way up vs WT	-2.48266	22.1569	1.5789	A0A140LHQ9	ELYSPSGERDDAGQVSPSSDQR	2xPhospho [S4(100); S6(100)]	2xPhospho [Y3(0.1); S4(100); S6(100); S16(0); S18(0); S19(0)]	---	0.0769982	0.00360171	Synm	synemin, intermediate filament protein	233335	Synm	7|7 C	protein-coding	+3s	22.9731	22.8196	22.9396	23.6158	23.811	22.1318	23.5557	17.2296	24.2745	21.073
961	230	A0A2I3BPN8_RLSNSSLCSIEEEHR_1xCarbamidomethyl [C8]; 2xPhospho [S3(89.2); S]_1xCarbamidomethyl [C8]; 2xPhospho [S3(89.2); S5(53.7); S6(53.7); S9(3.4)]	A0A2I3BPN8	---	5	5	20.6748	20.0542	20.3645	0.244621	1.53749	1.53749	6Mo-KO_1Way up vs WT	-1.43294	3.3873	0.62058	A0A2I3BPN8	RLSNSSLCSIEEEHR	1xCarbamidomethyl [C8]; 2xPhospho [S3(89.2); S]	1xCarbamidomethyl [C8]; 2xPhospho [S3(89.2); S5(53.7); S6(53.7); S9(3.4)]	---	0.120495	0.00595432	Ralgapa2	Ral GTPase activating protein, alpha subunit 2 (catalytic)	241694	Ralgapa2	2|2 G1	protein-coding	+1s	20.6226	20.4513	20.5936	19.9104	21.7961	21.474	19.5871	20.2794	19.5144	19.4162
1222	231	Q8BWB1_TPPPMAPKTPPPTTPK_1xOxidation [M5]; 2xPhospho [T1(100); T9(100)]_1xOxidation [M5]; 2xPhospho [T1(100); T9(100); T13(0); T14(0)]	Q8BWB1	Synpo2l	5	5	26.1554	25.7576	25.9565	0.245201	1.31748	1.31748	6Mo-KO_1Way up vs WT	-1.26018	2.18737	0.39778	Q8BWB1	TPPPMAPKTPPPTTPK	1xOxidation [M5]; 2xPhospho [T1(100); T9(100)]	1xOxidation [M5]; 2xPhospho [T1(100); T9(100); T13(0); T14(0)]	NP_001297361	1.92914e-05	0.000420153	Synpo2l	synaptopodin 2-like	68760	Synpo2l	14|14 A3	protein-coding	+1s	26.0711	25.558	26.0963	25.9565	27.0951	25.9281	26.2787	25.3377	25.9444	25.2992
1083	232	Q61136_EVIEASDKEGLSPAK_2xPhospho [S6(100); S12(100)]_2xPhospho [S6(100); S12(100)]	Q61136	Prpf4b	5	5	20.6592	21.3492	21.0042	0.245772	0.61988	-1.61322	6Mo-KO_1Way down vs WT	-3.89126	1.49522	-0.68994	Q61136	EVIEASDKEGLSPAK	2xPhospho [S6(100); S12(100)]	2xPhospho [S6(100); S12(100)]	NP_038858	0.095236	0.00392242	Prpf4b	pre-mRNA processing factor 4B	19134	Prpf4b	13|13 A3.3	protein-coding	-1s	20.901	21.1387	20.6186	20.7931	19.8448	21.1691	23.1167	20.0792	20.8176	21.5633
642	233	P63085_VADPDHDHTGFLTEYVATR_2xPhospho [T13(99.5); Y15(97.3)]_2xPhospho [T9(0); T13(99.5); Y15(97.3); T18(3.2)]	P63085	Mapk1	5	5	23.0943	22.4821	22.7882	0.247489	1.52861	1.52861	6Mo-KO_1Way up vs WT	-1.43342	3.34939	0.61222	P63085	VADPDHDHTGFLTEYVATR	2xPhospho [T13(99.5); Y15(97.3)]	2xPhospho [T9(0); T13(99.5); Y15(97.3); T18(3.2)]	NP_001033752	0.002845	0.000420153	Mapk1	mitogen-activated protein kinase 1	26413	Mapk1	16 A3|16 10.53 cM	protein-coding	+1s	22.1793	23.8685	22.8401	22.2055	24.378	22.7353	21.9768	22.2735	23.1644	22.2603
1122	234	D3Z5J3_RPHHSQPASACGSLSPASQTSPPSPPPPLVPPVPEDLHR_1xCarbamidomethyl [C11]; 2xPhospho [S9(92); S/T]_1xCarbamidomethyl [C11]; 2xPhospho [S5(3.2); S9(92); S13(32.3); S15(30); S18(8.9); T20(2.8); S21(1); S24(29.9)]	D3Z5J3	Sorbs1	5	5	20.6864	21.6581	21.1722	0.247594	0.509919	-1.9611	6Mo-KO_1Way down vs WT	-6.81253	1.77138	-0.97166	D3Z5J3	RPHHSQPASACGSLSPASQTSPPSPPPPLVPPVPEDLHR	1xCarbamidomethyl [C11]; 2xPhospho [S9(92); S/T]	1xCarbamidomethyl [C11]; 2xPhospho [S5(3.2); S9(92); S13(32.3); S15(30); S18(8.9); T20(2.8); S21(1); S24(29.9)]	NP_848139	0.00382138	0.000420153	Sorbs1	sorbin and SH3 domain containing 1	20411	Sorbs1	19 C3|19 34.25 cM	protein-coding	-2s	20.1462	21.4396	19.561	20.0255	22.2598	20.2161	22.1613	23.0008	20.2553	22.6569
1067	235	Q8BTI8_SMLQTPPDQNLSGSKSPCPQK_1xCarbamidomethyl [C18]; 2xPhospho [T5(100); S]_1xCarbamidomethyl [C18]; 2xPhospho [S1(0); T5(100); S12(0.1); S14(50); S16(50)]	Q8BTI8	Srrm2	5	5	21.8318	22.0298	21.9308	0.24778	0.871734	-1.14714	6Mo-KO_1Way down vs WT	-1.47873	1.12372	-0.19804	Q8BTI8	SMLQTPPDQNLSGSKSPCPQK	1xCarbamidomethyl [C18]; 2xPhospho [T5(100); S]	1xCarbamidomethyl [C18]; 2xPhospho [S1(0); T5(100); S12(0.1); S14(50); S16(50)]	NP_780438	0.0393033	0.00237867	Srrm2	serine/arginine repetitive matrix 2	75956	Srrm2	17|17 A3.3	protein-coding	-0.5s	22.2055	21.6427	21.7049	21.8029	21.8029	21.9997	22.2628	22.032	22.2703	21.5843
569	236	A0A1L1SSC0_RGSGDTSSLIDPDTSLSELR_1xPhospho [S/T]_1xPhospho [S3(25); T6(25); S7(25); S8(25); T14(0); S15(0); S17(0)]	A0A1L1SSC0	---	5	5	21.9595	21.4518	21.7056	0.250827	1.42182	1.42182	6Mo-KO_1Way up vs WT	-1.35477	2.73877	0.50774	A0A1L1SSC0	RGSGDTSSLIDPDTSLSELR	1xPhospho [S/T]	1xPhospho [S3(25); T6(25); S7(25); S8(25); T14(0); S15(0); S17(0)]	---	0.00147975	0.000420153	Lrrfip2	leucine rich repeat (in FLII) interacting protein 2	71268	Lrrfip2	9|9 F3	protein-coding	+1s	21.4123	22.2441	21.8792	22.3416	21.9204	20.7323	21.5687	21.1467	22.8526	20.9586
490	237	Q3UMU9_GGSSGEELEDEEPVKK_2xPhospho [S3(100); S4(100)]_2xPhospho [S3(100); S4(100)]	Q3UMU9	Hdgfl2	5	5	21.1519	21.7276	21.4398	0.251269	0.670998	-1.49032	6Mo-KO_1Way down vs WT	-3.13603	1.41196	-0.57562	Q3UMU9	GGSSGEELEDEEPVKK	2xPhospho [S3(100); S4(100)]	2xPhospho [S3(100); S4(100)]	NP_001291713	0.026884	0.00132202	Hdgfl2	HDGF like 2	15193	Hdgfl2	17|17 D	protein-coding	-1s	20.6765	20.9258	21.5522	20.2951	22.3101	22.0948	21.2877	21.1652	21.3473	22.7428
1159	238	E9Q447_SLQQLAEER_1xPhospho [S1(100)]_1xPhospho [S1(100)]	E9Q447	---	5	5	22.8074	22.3524	22.5799	0.251338	1.37078	1.37078	6Mo-KO_1Way up vs WT	-1.31362	2.46834	0.455	E9Q447	SLQQLAEER	1xPhospho [S1(100)]	1xPhospho [S1(100)]	---	0.00838455	0.000644898	Sptan1	spectrin alpha, non-erythrocytic 1	20740	Sptan1	2 B|2 20.93 cM	protein-coding	+1s	22.5702	22.8975	22.6654	23.0588	22.8449	22.0345	22.3947	22.3262	23.6009	21.4055
719	239	E9Q9T8_TSDSHEDAGTLDFSSLLK_1xPhospho [T/S]_1xPhospho [T1(47.9); S2(47.9); S4(4.1); T10(0); S14(0); S15(0)]	E9Q9T8	---	5	5	28.6504	28.3167	28.4836	0.251964	1.26021	1.26021	6Mo-KO_1Way up vs WT	-1.22221	1.94101	0.33366	E9Q9T8	TSDSHEDAGTLDFSSLLK	1xPhospho [T/S]	1xPhospho [T1(47.9); S2(47.9); S4(4.1); T10(0); S14(0); S15(0)]	---	4.99787e-06	0.000420153	Mybpc3	myosin binding protein C, cardiac	17868	Mybpc3	2|2 E1	protein-coding	+0.5s	28.1878	28.6948	28.3487	29.2649	28.7557	27.9393	28.5551	28.0164	28.9716	28.1012
1282	240	A0A087WQ94_QGSPTPALPEKR_1xPhospho [S3(98.8)]_1xPhospho [S3(98.8); T5(1.2)]	A0A087WQ94	---	5	5	21.7388	20.8696	21.3042	0.25222	1.82665	1.82665	6Mo-KO_1Way up vs WT	-1.68773	5.63136	0.8692	A0A087WQ94	QGSPTPALPEKR	1xPhospho [S3(98.8)]	1xPhospho [S3(98.8); T5(1.2)]	---	0.00792747	0.000644898	Tns1	tensin 1	21961	Tns1	1 C3|1 38.17 cM	protein-coding	+2s	21.5029	21.6489	21.4561	22.3298	21.7561	20.9181	21.2144	21.9177	22.0423	18.2553
1346	241	A2ASS6_LVRPLYSVEVMETETAR_1xOxidation [M11]; 1xPhospho [S7(100)]_1xOxidation [M11]; 1xPhospho [Y6(0); S7(100); T13(0); T15(0)]	A2ASS6	---	5	5	20.6157	21.006	20.8108	0.2536	0.76295	-1.3107	6Mo-KO_1Way down vs WT	-2.17661	1.26699	-0.39034	A2ASS6	LVRPLYSVEVMETETAR	1xOxidation [M11]; 1xPhospho [S7(100)]	1xOxidation [M11]; 1xPhospho [Y6(0); S7(100); T13(0); T15(0)]	---	0.0159563	0.00109972	Ttn	titin	22138	Ttn	2 C3|2 45.13 cM	protein-coding	-1s	19.8448	20.9632	20.3911	21.2222	20.6571	20.4089	20.8495	20.8176	21.5733	21.3808
487	242	P51859_AGDVLEDSPK_1xPhospho [S8(100)]_1xPhospho [S8(100)]	P51859	Hdgf	5	5	23.2643	22.9585	23.1114	0.257546	1.2361	1.2361	6Mo-KO_1Way up vs WT	-1.20803	1.84582	0.3058	P51859	AGDVLEDSPK	1xPhospho [S8(100)]	1xPhospho [S8(100)]	NP_032257	3.76357e-05	0.000420153	Hdgf	heparin binding growth factor	15191	Hdgf	3 F1|3 38.78 cM	protein-coding	+0.5s	23.0054	23.7944	23.5053	23.3904	22.6258	22.8526	22.5883	22.9757	23.4837	22.892
380	243	E9Q9E1_SFSKEVEER_1xPhospho [S1(99.6)]_1xPhospho [S1(99.6); S3(0.4)]	E9Q9E1	---	5	5	22.2629	21.9274	22.0952	0.257673	1.26178	1.26178	6Mo-KO_1Way up vs WT	-1.23054	1.95913	0.33546	E9Q9E1	SFSKEVEER	1xPhospho [S1(99.6)]	1xPhospho [S1(99.6); S3(0.4)]	---	0.00985006	0.000644898	Eif4g1	eukaryotic translation initiation factor 4, gamma 1	208643	Eif4g1	16|16 A3	protein-coding	+0.5s	22.1826	21.5	21.9986	22.9495	22.6836	22.0711	21.7425	22.0188	21.6338	22.1708
312	244	Q64449_YSRSSHSGPAEATEK_2xPhospho [S2(99.7); S5(97.6)]_2xPhospho [Y1(0); S2(99.7); S4(2.4); S5(97.6); S7(0.3); T13(0)]	Q64449	Mrc2	5	5	22.5223	22.899	22.7107	0.259178	0.770187	-1.29839	6Mo-KO_1Way down vs WT	-2.13169	1.26449	-0.37672	Q64449	YSRSSHSGPAEATEK	2xPhospho [S2(99.7); S5(97.6)]	2xPhospho [Y1(0); S2(99.7); S4(2.4); S5(97.6); S7(0.3); T13(0)]	NP_032652	0.00401393	0.000420153	Mrc2	mannose receptor, C type 2	17534	Mrc2	11|11 E1	protein-coding	-0.5s	22.867	23.0179	22.5802	22.6258	21.5206	22.9824	22.4726	23.2157	23.2678	22.5566
703	245	Q02566; Q91Z83_SLSTELFK_1xPhospho [S3(91.9)]_1xPhospho [S1(0); S3(91.9); T4(8.1)]	Q02566; Q91Z83	---	5	5	23.3389	22.8968	23.1179	0.259718	1.35854	1.35854	6Mo-KO_1Way up vs WT	-1.31796	2.43248	0.44206	Q02566; Q91Z83	SLSTELFK	1xPhospho [S3(91.9)]	1xPhospho [S1(0); S3(91.9); T4(8.1)]	---	0.0215289	0.00109972	Myh6	myosin, heavy polypeptide 6, cardiac muscle, alpha	17888	Myh6	14 C3|14 28.01 cM	protein-coding	+1s	22.9653	23.1036	22.7177	23.7769	24.1309	22.3231	23.5367	22.9856	23.3182	22.3205
1293	246	Q8CGB6_AGSVSPGSPPYLQPR_2xPhospho [S3(100); S5(100)]_2xPhospho [S3(100); S5(100); S8(0); Y11(0)]	Q8CGB6	Tns2	5	5	18.4684	19.5627	19.0156	0.260562	0.468363	-2.13509	6Mo-KO_1Way down vs WT	-9.05427	1.98618	-1.0943	Q8CGB6	AGSVSPGSPPYLQPR	2xPhospho [S3(100); S5(100)]	2xPhospho [S3(100); S5(100); S8(0); Y11(0)]	NP_705761	0.00282508	0.000420153	Tns2	tensin 2	209039	Tns2	15 F2|15 57.29 cM	protein-coding	-2s	17.9585	18.7898	18.2584	17.4168	19.9187	21.5586	17.8679	20.5533	20.3402	17.4937
1314	247	P39447_SREDLSAQPVQTK_1xPhospho [S1(99.8)]_1xPhospho [S1(99.8); S6(0.2); T12(0)]	P39447	Tjp1	5	5	22.122	22.8095	22.4657	0.261715	0.620929	-1.61049	6Mo-KO_1Way down vs WT	-4.00115	1.54265	-0.6875	P39447	SREDLSAQPVQTK	1xPhospho [S1(99.8)]	1xPhospho [S1(99.8); S6(0.2); T12(0)]	NP_033412	0.127692	0.00631624	Tjp1	tight junction protein 1	21872	Tjp1	7 C|7 35.02 cM	protein-coding	-1s	22.307	22.0517	21.543	22.6435	22.065	21.5633	22.4792	22.4608	22.7243	24.8201
664	248	Q14BI5_RVSASEEEEVENENR_1xPhospho [S3(99.2)]_1xPhospho [S3(99.2); S5(0.8)]	Q14BI5	Myom2	5	5	24.3269	24.0743	24.2006	0.262316	1.19135	1.19135	6Mo-KO_1Way up vs WT	-1.1732	1.66514	0.2526	Q14BI5	RVSASEEEEVENENR	1xPhospho [S3(99.2)]	1xPhospho [S3(99.2); S5(0.8)]	NP_032690	0.00175174	0.000420153	Myom2	myomesin 2	17930	Myom2	8|8 A1.1	protein-coding	+0.5s	23.9995	24.5499	24.6099	24.378	24.0971	23.6302	23.7639	24.104	24.5552	24.3181
439	249	P23242_MGQAGSTISNSHAQPFDFPDDSQNAKK_1xDeamidated [N/Q]; 2xPhospho [S/T]_1xDeamidated [Q23; N24]; 2xPhospho [S6(50); T7(50); S9(50); S11(50); S22(0)]	P23242	Gja1	5	5	27.4268	27.0557	27.2413	0.263799	1.29339	1.29339	6Mo-KO_1Way up vs WT	-1.26664	2.11892	0.37116	P23242	MGQAGSTISNSHAQPFDFPDDSQNAKK	1xDeamidated [N/Q]; 2xPhospho [S/T]	1xDeamidated [Q23; N24]; 2xPhospho [S6(50); T7(50); S9(50); S11(50); S22(0)]	NP_034418	0.00145909	0.000420153	Gja1	gap junction protein, alpha 1	14609	Gja1	10 B4|10 28.64 cM	protein-coding	+1s	27.6918	27.2002	27.1171	27.2567	27.8684	27.7797	27.2603	26.9324	26.1236	27.1824
41	250	E9Q4K0_TSSESIVSVPASSTSGSPSR_1xPhospho [T/S]_1xPhospho [T1(33.2); S2(33.2); S3(33.2); S5(0.2); S8(0.2); S12(0); S13(0); T14(0); S15(0); S17(0); S19(0)]	E9Q4K0	Ablim2	5	5	23.0019	22.1859	22.5939	0.26455	1.76054	1.76054	6Mo-KO_1Way up vs WT	-1.68459	5.22139	0.81602	E9Q4K0	TSSESIVSVPASSTSGSPSR	1xPhospho [T/S]	1xPhospho [T1(33.2); S2(33.2); S3(33.2); S5(0.2); S8(0.2); S12(0); S13(0); T14(0); S15(0); S17(0); S19(0)]	NP_001171167	0.0278315	0.00132202	Ablim2	actin-binding LIM protein 2	231148	Ablim2	5|5 B3	protein-coding	+2s	22.2656	22.5941	22.7594	23.9684	23.4222	22.1247	22.8096	22.2243	23.7293	20.0417
884	251	E9Q3W4_SSSVGSSSSYPISSAGPR_1xPhospho [S3(88.7)]_1xPhospho [S1(5.7); S2(5.7); S3(88.7); S6(0); S7(0); S8(0); S9(0); Y10(0); S13(0); S14(0)]	E9Q3W4	Plec	5	5	24.2055	23.8049	24.0052	0.264881	1.32008	1.32008	6Mo-KO_1Way up vs WT	-1.29232	2.25199	0.40062	E9Q3W4	SSSVGSSSSYPISSAGPR	1xPhospho [S3(88.7)]	1xPhospho [S1(5.7); S2(5.7); S3(88.7); S6(0); S7(0); S8(0); S9(0); Y10(0); S13(0); S14(0)]	NP_001157675	2.78119e-05	0.000420153	Plec	plectin	18810	Plec	15 D3|15 35.48 cM	protein-coding	+1s	23.3645	24.1721	24.0708	24.7914	24.6288	23.4933	24.1663	23.8251	24.3838	23.156
1014	252	O55143_EFDELSPSAQR_1xPhospho [S8(100)]_1xPhospho [S6(0); S8(100)]	O55143	Atp2a2	5	5	29.1659	28.8956	29.0308	0.265365	1.20601	1.20601	6Mo-KO_1Way up vs WT	-1.18932	1.72981	0.27024	O55143	EFDELSPSAQR	1xPhospho [S8(100)]	1xPhospho [S6(0); S8(100)]	NP_001103610	0.0354465	0.00227803	Atp2a2	ATPase, Ca++ transporting, cardiac muscle, slow twitch 2	11938	Atp2a2	5 62.38 cM|5 F	protein-coding	+0.5s	28.7557	29.0328	28.9091	29.4513	29.6804	28.5049	29.146	28.9122	29.2714	28.6436
107	253	Q9JIX8_TAQVPSPPR_1xPhospho [S6(100)]_1xPhospho [T1(0); S6(100)]	Q9JIX8	Acin1	5	5	21.0354	20.5054	20.7704	0.266507	1.44391	1.44391	6Mo-KO_1Way up vs WT	-1.40755	2.93457	0.52998	Q9JIX8	TAQVPSPPR	1xPhospho [S6(100)]	1xPhospho [T1(0); S6(100)]	NP_001078942	0.0444725	0.00237867	Acin1	apoptotic chromatin condensation inducer 1	56215	Acin1	14|14 C2	protein-coding	+1s	20.3793	20.8256	20.3062	21.6322	22.0338	19.5587	20.7724	20.4428	21.2835	20.4698
1217	254	Q3UID0_RSPSPSPTPEAK_2xPhospho [S2(100); S4(99.9)]_2xPhospho [S2(100); S4(99.9); S6(0); T8(0)]	Q3UID0	Smarcc2	5	5	21.3451	20.6256	20.9854	0.266658	1.6467	1.6467	6Mo-KO_1Way up vs WT	-1.59118	4.3147	0.71958	Q3UID0	RSPSPSPTPEAK	2xPhospho [S2(100); S4(99.9)]	2xPhospho [S2(100); S4(99.9); S6(0); T8(0)]	NP_001107568	0.0270709	0.00132202	Smarcc2	SWI/SNF related, matrix associated, actin dependent regulator of chromatin, subfamily c, member 2	68094	Smarcc2	10|10 D3	protein-coding	+1s	21.5854	20.9933	21.2399	20.3972	22.5099	21.6338	19.1088	21.665	19.9879	20.7323
644	255	A0A3B2WB60_HTDDEMTGYVATR_2xPhospho [T7(100); Y9(99.9)]_2xPhospho [T2(0); T7(100); Y9(99.9); T12(0.1)]	A0A3B2WB60	---	5	5	21.7231	22.2674	21.9952	0.266968	0.685734	-1.45829	6Mo-KO_1Way down vs WT	-3.02336	1.42168	-0.54428	A0A3B2WB60	HTDDEMTGYVATR	2xPhospho [T7(100); Y9(99.9)]	2xPhospho [T2(0); T7(100); Y9(99.9); T12(0.1)]	---	0.0432696	0.00237867	Mapk14	mitogen-activated protein kinase 14	26416	Mapk14	17 A3.3|17 14.85 cM	protein-coding	-1s	21.2035	22.9869	21.6666	20.9458	21.8128	21.5993	23.2761	22.1993	21.8369	22.4254
35	256	E9Q9C4_TSSESIYSRPGSSIPGSPGHTIYAK_1xPhospho [S/T/Y]_1xPhospho [T1(13.5); S2(13.5); S3(70.3); S5(2.7); Y7(0); S8(0); S12(0); S13(0); S17(0); T21(0); Y23(0)]	E9Q9C4	---	5	5	22.4389	21.9775	22.2082	0.267016	1.37693	1.37693	6Mo-KO_1Way up vs WT	-1.34766	2.55509	0.46146	E9Q9C4	TSSESIYSRPGSSIPGSPGHTIYAK	1xPhospho [S/T/Y]	1xPhospho [T1(13.5); S2(13.5); S3(70.3); S5(2.7); Y7(0); S8(0); S12(0); S13(0); S17(0); T21(0); Y23(0)]	---	0.00078031	0.000420153	Ablim1	actin-binding LIM protein 1	226251	Ablim1	19 D2|19 52.09 cM	protein-coding	+1s	21.9986	22.0865	22.0517	23.2693	22.7885	21.2221	22.4344	21.9319	22.8096	21.4893
1213	257	Q8CH09_DSSDAAQDCLSEPAKPCPQPSSPGALGPSPRPTGADDSEALPASSR_2xCarbamidomethyl [C9; C17]; 1xDeamidated [Q19]; 2xPhospho [S29(99.9); S/T]_2xCarbamidomethyl [C9; C17]; 1xDeamidated [Q19]; 2xPhospho [S2(0); S3(0); S11(0.1); S21(50); S22(50); S29(99.9); T33(0.1); S38¬'╓$b*	Q8CH09	Sugp2	5	5	22.7356	22.1853	22.4605	0.27026	1.46435	1.46435	6Mo-KO_1Way up vs WT	-1.43507	3.07724	0.55026	Q8CH09	DSSDAAQDCLSEPAKPCPQPSSPGALGPSPRPTGADDSEALPASSR	2xCarbamidomethyl [C9; C17]; 1xDeamidated [Q19]; 2xPhospho [S29(99.9); S/T]	2xCarbamidomethyl [C9; C17]; 1xDeamidated [Q19]; 2xPhospho [S2(0); S3(0); S11(0.1); S21(50); S22(50); S29(99.9); T33(0.1); S38¬'╓$b*	NP_001161762	0.00978133	0.000644898	Sugp2	SURP and G patch domain containing 2	234373	Sugp2	8|8 B3.3	protein-coding	+1s	22.5498	22.2826	23.0517	21.5397	24.2541	22.499	22.0345	22.3388	21.8743	22.18
1343	258	A2ASS6_GSTELVPGAR_1xPhospho [S2(98.5)]_1xPhospho [S2(98.5); T3(1.5)]	A2ASS6	---	5	5	21.4655	21.1446	21.3051	0.270725	1.24916	1.24916	6Mo-KO_1Way up vs WT	-1.23509	1.92724	0.32096	A2ASS6	GSTELVPGAR	1xPhospho [S2(98.5)]	1xPhospho [S2(98.5); T3(1.5)]	---	0.0276394	0.00132202	Ttn	titin	22138	Ttn	2 C3|2 45.13 cM	protein-coding	+0.5s	21.4659	21.1188	21.2582	21.8792	21.6056	20.7891	21.0777	20.499	21.6844	21.6727
331	259	P31001_TSGGAGGLGSLR_1xPhospho [T/S]_1xPhospho [T1(50); S2(50); S10(0)]	P31001	Des	5	5	24.4249	23.9851	24.205	0.271037	1.35638	1.35638	6Mo-KO_1Way up vs WT	-1.33605	2.45801	0.43976	P31001	TSGGAGGLGSLR	1xPhospho [T/S]	1xPhospho [T1(50); S2(50); S10(0)]	NP_034173	0.00177654	0.000420153	Des	desmin	13346	Des	1 C4|1 38.85 cM	protein-coding	+1s	24.0069	24.2838	23.9743	24.71	25.1495	23.523	24.5623	23.6115	24.8367	23.3922
1272	260	E0CX53_HASAPSHVQPSDSEK_1xPhospho [S3(99.9)]_1xPhospho [S3(99.9); S6(0.1); S11(0); S13(0)]	E0CX53	---	5	5	19.8599	20.4821	20.171	0.271606	0.649697	-1.53918	6Mo-KO_1Way down vs WT	-3.5732	1.50827	-0.62216	E0CX53	HASAPSHVQPSDSEK	1xPhospho [S3(99.9)]	1xPhospho [S3(99.9); S6(0.1); S11(0); S13(0)]	---	0.0330836	0.00203657	Tbc1d4	TBC1 domain family, member 4	210789	Tbc1d4	14|14 E2.3	protein-coding	-1s	20.0255	18.6935	19.3517	20.8036	20.4254	19.2919	20.3402	20.2747	21.3771	21.1266
295	261	E9Q6E0_TGSSPTQGIVNK_1xPhospho [S4(82.8)]_1xPhospho [T1(2.6); S3(14.1); S4(82.8); T6(0.5)]	E9Q6E0	Mapk8ip3	5	5	21.4334	21.0882	21.2608	0.273614	1.27033	1.27033	6Mo-KO_1Way up vs WT	-1.25878	2.03132	0.3452	E9Q6E0	TGSSPTQGIVNK	1xPhospho [S4(82.8)]	1xPhospho [T1(2.6); S3(14.1); S4(82.8); T6(0.5)]	NP_001156922	0.0739668	0.00329599	Mapk8ip3	mitogen-activated protein kinase 8 interacting protein 3	30957	Mapk8ip3	17 A3.3|17 12.53 cM	protein-coding	+0.5s	20.7876	21.6899	21.3643	22.2022	21.1231	20.9638	20.8266	21.3703	21.5767	20.7037
14	262	F2Z400_ANSFVGTAQYVSPELLTEK_1xPhospho [S3(100)]_1xPhospho [S3(100); T7(0); Y10(0); S12(0); T17(0)]	F2Z400	---	5	5	19.3547	18.5805	18.9676	0.274026	1.71019	1.71019	6Mo-KO_1Way up vs WT	-1.67716	4.90528	0.77416	F2Z400	ANSFVGTAQYVSPELLTEK	1xPhospho [S3(100)]	1xPhospho [S3(100); T7(0); Y10(0); S12(0); T17(0)]	---	0.145988	0.00826345	Pdpk1	3-phosphoinositide dependent protein kinase 1	18607	Pdpk1	17|17 A3.3	protein-coding	+2s	19.2065	18.2223	18.5395	20.8141	19.9911	18.4219	18.5379	17.6839	20.303	17.956
577	263	F6TFN2_STTELNDPLIEK_1xPhospho [S/T]_1xPhospho [S1(49.7); T2(49.7); T3(0.6)]	F6TFN2	---	5	5	23.4584	23.0843	23.2714	0.274029	1.29603	1.29603	6Mo-KO_1Way up vs WT	-1.28388	2.15652	0.3741	F6TFN2	STTELNDPLIEK	1xPhospho [S/T]	1xPhospho [S1(49.7); T2(49.7); T3(0.6)]	---	0.00516814	0.000644898	Lmo7	LIM domain only 7	380928	Lmo7	14 E2.3|14 50.9 cM	protein-coding	+1s	23.2102	23.1428	22.9731	23.9377	24.0282	22.7463	23.5285	22.8308	23.7461	22.5698
840	264	Q8VBU5_LPGNRPTSPKISPR_2xPhospho [S12(100); T/S]_2xPhospho [T7(50); S8(50); S12(100)]	Q8VBU5	Pde4b	5	5	24.7849	24.5102	24.6475	0.274045	1.20976	1.20976	6Mo-KO_1Way up vs WT	-1.20143	1.75832	0.27472	Q8VBU5	LPGNRPTSPKISPR	2xPhospho [S12(100); T/S]	2xPhospho [T7(50); S8(50); S12(100)]	NP_001171451	0.0710483	0.00329599	Pde4b	phosphodiesterase 4B, cAMP specific	18578	Pde4b	4 C6|4 46.99 cM	protein-coding	+0.5s	24.7228	24.9568	24.7328	24.6723	24.84	25.0667	24.6166	24.8548	23.7879	24.2251
801	265	Q3B7Z2_MLAESDDSGDEESVSQTDKTELQSTLR_2xPhospho [S5(100); S8(100)]_2xPhospho [S5(100); S8(100); S13(0); S15(0); T17(0); T20(0); S24(0); T25(0)]	Q3B7Z2	Osbp	5	5	21.1417	20.3465	20.7441	0.277617	1.73541	1.73541	6Mo-KO_1Way up vs WT	-1.71598	5.16795	0.79528	Q3B7Z2	MLAESDDSGDEESVSQTDKTELQSTLR	2xPhospho [S5(100); S8(100)]	2xPhospho [S5(100); S8(100); S13(0); S15(0); T17(0); T20(0); S24(0); T25(0)]	NP_001028346	0.00268948	0.000420153	Osbp	oxysterol binding protein	76303	Osbp	19 A|19 8.58 cM	protein-coding	+2s	20.9058	20.9884	21.5029	20.5511	21.7605	19.8559	21.4893	19.0178	19.1291	22.2402
308	266	Q3UMF0_TGSLQLSSTSIGTSSLK_1xPhospho [T1(88.5)]_1xPhospho [T1(88.5); S3(11.5); S7(0); S8(0); T9(0); S10(0); T13(0); S14(0); S15(0)]	Q3UMF0	Cobll1	5	5	19.2791	19.8733	19.5762	0.279728	0.662393	-1.50968	6Mo-KO_1Way down vs WT	-3.42515	1.50284	-0.59424	Q3UMF0	TGSLQLSSTSIGTSSLK	1xPhospho [T1(88.5)]	1xPhospho [T1(88.5); S3(11.5); S7(0); S8(0); T9(0); S10(0); T13(0); S14(0); S15(0)]	NP_081501	0.000605764	0.000420153	Cobll1	Cobl-like 1	319876	Cobll1	2|2 C1.3	protein-coding	-1s	18.6645	19.7335	18.8498	20.4053	18.7423	18.9893	20.4907	19.4691	21.0388	19.3787
888	267	P48678_LRLSPSPTSQR_2xPhospho [S4(100); S6(96.5)]_2xPhospho [S4(100); S6(96.5); T8(1.8); S9(1.8)]	P48678	Lmna	5	5	25.7305	25.489	25.6097	0.279972	1.18216	1.18216	6Mo-KO_1Way up vs WT	-1.18019	1.64931	0.24142	P48678	LRLSPSPTSQR	2xPhospho [S4(100); S6(96.5)]	2xPhospho [S4(100); S6(96.5); T8(1.8); S9(1.8)]	NP_001002011	0.00114077	0.000420153	Lmna	lamin A	16905	Lmna	3 F1|3 38.84 cM	protein-coding	+0.5s	26.0255	26.0255	25.8696	25.6192	25.1125	25.8039	25.348	25.2383	25.3089	25.7461
555	268	Q3UHZ5_SRPPSPVAPPPPPPPPPLPPHMLPPPPPPPAPPLPEK_2xPhospho [S1(100); S5(100)]_2xPhospho [S1(100); S5(100)]	Q3UHZ5	Lmod2	5	5	19.8349	20.86	20.3474	0.282421	0.491356	-2.03519	6Mo-KO_1Way down vs WT	-8.4358	2.03666	-1.02516	Q3UHZ5	SRPPSPVAPPPPPPPPPLPPHMLPPPPPPPAPPLPEK	2xPhospho [S1(100); S5(100)]	2xPhospho [S1(100); S5(100)]	NP_444328	0.0903315	0.00360171	Lmod2	leiomodin 2 (cardiac)	93677	Lmod2	6|6 A3.1	protein-coding	-2s	22.0547	18.5079	18.5951	18.7423	21.2744	20.9889	22.6016	19.9548	20.3936	20.3613
1440	269	P52479_CSPPVPSPLASEK_1xCarbamidomethyl [C1]; 1xPhospho [S]_1xCarbamidomethyl [C1]; 1xPhospho [S2(50); S7(0.1); S11(50)]	P52479	Usp10	5	5	20.0969	20.4726	20.2847	0.284994	0.770742	-1.29745	6Mo-KO_1Way down vs WT	-2.19126	1.30171	-0.37568	P52479	CSPPVPSPLASEK	1xCarbamidomethyl [C1]; 1xPhospho [S]	1xCarbamidomethyl [C1]; 1xPhospho [S2(50); S7(0.1); S11(50)]	NP_001297559	0.104418	0.00429411	Usp10	ubiquitin specific peptidase 10	22224	Usp10	8|8 E1	protein-coding	-0.5s	19.6849	19.9421	19.9344	20.6226	20.3004	19.996	20.8654	19.842	21.3673	20.2921
1379	270	A2ASS6_LEEELELGFSASPPSRSPPR_2xPhospho [S10(98.3); S15(98.3)]_2xPhospho [S10(98.3); S12(1.7); S15(98.3); S17(1.7)]	A2ASS6	---	5	5	24.182	24.8095	24.4958	0.287206	0.647297	-1.54489	6Mo-KO_1Way down vs WT	-3.72346	1.56011	-0.6275	A2ASS6	LEEELELGFSASPPSRSPPR	2xPhospho [S10(98.3); S15(98.3)]	2xPhospho [S10(98.3); S12(1.7); S15(98.3); S17(1.7)]	---	0.000618682	0.000420153	Ttn	titin	22138	Ttn	2 C3|2 45.13 cM	protein-coding	-1s	24.0566	24.6975	24.2483	23.3777	24.5299	25.7037	24.8277	22.9066	25.5201	25.0894
531	271	Q9ET78_TSLSSLRSEHSNGTVAPDSPAADGPMLPSPPVPR_1xDeamidated [N12]; 3xPhospho [S11(94); S/T]_1xDeamidated [N12]; 3xPhospho [T1(46.5); S2(46.5); S4(33); S5(73.8); S8(1); S11(94); T14(4.6); S19(0.7); S29(0)]	Q9ET78	Jph2	5	5	20.4607	21.3883	20.9245	0.287471	0.525739	-1.90208	6Mo-KO_1Way down vs WT	-6.98743	1.93134	-0.92758	Q9ET78	TSLSSLRSEHSNGTVAPDSPAADGPMLPSPPVPR	1xDeamidated [N12]; 3xPhospho [S11(94); S/T]	1xDeamidated [N12]; 3xPhospho [T1(46.5); S2(46.5); S4(33); S5(73.8); S8(1); S11(94); T14(4.6); S19(0.7); S29(0)]	NP_001192005	0.000241063	0.000420153	Jph2	junctophilin 2	59091	Jph2	2|2 H3	protein-coding	-2s	21.8638	20.4937	20.6461	20.5102	18.7898	21.4336	19.146	21.5993	21.5422	23.2204
1241	272	Q8BWB1_RFSTPAPQPTAEPLAPTVLVPR_1xPhospho [S3(87.9)]_1xPhospho [S3(87.9); T4(12.1); T10(0); T17(0)]	Q8BWB1	Synpo2l	5	5	22.4352	21.6523	22.0437	0.288124	1.72056	1.72056	6Mo-KO_1Way up vs WT	-1.74566	5.16775	0.78288	Q8BWB1	RFSTPAPQPTAEPLAPTVLVPR	1xPhospho [S3(87.9)]	1xPhospho [S3(87.9); T4(12.1); T10(0); T17(0)]	NP_001297361	0.000526273	0.000420153	Synpo2l	synaptopodin 2-like	68760	Synpo2l	14|14 A3	protein-coding	+2s	22.1642	22.3135	22.4832	23.0095	22.2055	20.6534	22.112	22.2628	23.5416	19.6917
614	273	D3YY81_AETSESSGSAPAVPEASASPK_1xPhospho [S19(100)]_1xPhospho [T3(0); S4(0); S6(0); S7(0); S9(0); S17(0); S19(100)]	D3YY81	---	5	5	23.9157	23.4651	23.6904	0.289815	1.36661	1.36661	6Mo-KO_1Way up vs WT	-1.38135	2.57984	0.4506	D3YY81	AETSESSGSAPAVPEASASPK	1xPhospho [S19(100)]	1xPhospho [T3(0); S4(0); S6(0); S7(0); S9(0); S17(0); S19(100)]	---	1.38604e-05	0.000420153	Mecp2	methyl CpG binding protein 2	17257	Mecp2	X A7.3|X 37.63 cM	protein-coding	+1s	23.3542	24.0472	23.7454	24.4631	23.9684	22.8349	24.0708	23.1606	24.5199	22.7391
549	274	Q61029_SSTPLPTVSSSAENTR_1xPhospho [T3(92)]_1xPhospho [S1(0.6); S2(7.4); T3(92); T7(0); S9(0); S10(0); S11(0); T15(0)]	Q61029	Tmpo	5	5	23.2492	22.6162	22.9327	0.289937	1.55076	1.55076	6Mo-KO_1Way up vs WT	-1.5747	3.78694	0.63298	Q61029	SSTPLPTVSSSAENTR	1xPhospho [T3(92)]	1xPhospho [S1(0.6); S2(7.4); T3(92); T7(0); S9(0); S10(0); S11(0); T15(0)]	NP_001073598	0.0221359	0.00109972	Tmpo	thymopoietin	21917	Tmpo	10 C2|10 45.66 cM	protein-coding	+1s	22.7594	23.1749	22.5295	23.8747	23.9073	21.7487	23.2678	22.1084	24.1936	21.7624
1180	275	Q60598_KQTPPASPSPQPIEDRPPSSPIYEDAAPFK_2xPhospho [T3(100); S9(85)]_2xPhospho [T3(100); S7(15.1); S9(85); S19(0); S20(0); Y23(0)]	Q60598	Cttn	5	5	27.8155	27.5143	27.6649	0.290752	1.23212	1.23212	6Mo-KO_1Way up vs WT	-1.24209	1.88563	0.30114	Q60598	KQTPPASPSPQPIEDRPPSSPIYEDAAPFK	2xPhospho [T3(100); S9(85)]	2xPhospho [T3(100); S7(15.1); S9(85); S19(0); S20(0); Y23(0)]	NP_031829	0.0019741	0.000420153	Cttn	cortactin	13043	Cttn	7|7 F5	protein-coding	+0.5s	27.5803	27.6037	27.4037	28.0974	28.3923	27.204	28.0667	27.4664	27.8129	27.0217
750	276	P08553_AKSPMPKSPVEEVKPKPEAK_2xPhospho [S3(100); S8(100)]_2xPhospho [S3(100); S8(100)]	P08553	Nefm	5	5	23.1667	22.702	22.9343	0.291167	1.37999	1.37999	6Mo-KO_1Way up vs WT	-1.39811	2.66252	0.46466	P08553	AKSPMPKSPVEEVKPKPEAK	2xPhospho [S3(100); S8(100)]	2xPhospho [S3(100); S8(100)]	NP_032717	1.7117e-05	0.000420153	Nefm	neurofilament, medium polypeptide	18040	Nefm	14|14 D1	protein-coding	+1s	22.7288	23.1349	23.1349	23.9628	22.8719	22.0089	23.8692	22.18	22.3075	23.1444
318	277	Q8BGU5_SASADNLILPR_1xPhospho [S3(100)]_1xPhospho [S1(0); S3(100)]	Q8BGU5	Ccny	5	5	23.3352	22.9991	23.1671	0.294012	1.26232	1.26232	6Mo-KO_1Way up vs WT	-1.27814	2.03666	0.33608	Q8BGU5	SASADNLILPR	1xPhospho [S3(100)]	1xPhospho [S1(0); S3(100)]	NP_080760	0.00033788	0.000420153	Ccny	cyclin Y	67974	Ccny	18|18 A1	protein-coding	+0.5s	22.9834	23.1385	23.014	23.9175	23.6227	22.6795	23.1408	22.8231	23.8425	22.5098
1129	278	D3Z5J3; Q62417_VETVNKSPSANSPQSSAVSPTPDITSEPPGYIYSSNFHAVK_2xPhospho [T3(99.7); S7(91.8)]_2xPhospho [T3(99.7); S7(91.8); S9(8.3); S12(0.1); S15(0.1); S16(0); S19(0); T21(0); T25(0); S26(0); Y31(0); Y33(0); S34(0); S35(0)]	D3Z5J3; Q62417	---	5	5	21.9378	21.3613	21.6496	0.29425	1.49131	1.49131	6Mo-KO_1Way up vs WT	-1.52418	3.38978	0.57658	D3Z5J3; Q62417	VETVNKSPSANSPQSSAVSPTPDITSEPPGYIYSSNFHAVK	2xPhospho [T3(99.7); S7(91.8)]	2xPhospho [T3(99.7); S7(91.8); S9(8.3); S12(0.1); S15(0.1); S16(0); S19(0); T21(0); T25(0); S26(0); Y31(0); Y33(0); S34(0); S35(0)]	---	0.154506	0.00912834	Sorbs1	sorbin and SH3 domain containing 1	20411	Sorbs1	19 C3|19 34.25 cM	protein-coding	+1s	22.1986	22.9044	22.696	21.3441	20.5461	20.8913	20.8443	22.314	21.2918	21.4649
232	279	O54724_ATEEPSGTGSDELIKSDQVNGVLVLSLLDK_1xDeamidated [N/Q]; 2xPhospho [T2(100); S10(75.7)]_1xDeamidated [Q18; N20]; 2xPhospho [T2(100); S6(5); T8(19.2); S10(75.7); S16(0.1); S26(0)]	O54724	Cavin1	5	5	23.9791	24.5046	24.2418	0.294407	0.694709	-1.43945	6Mo-KO_1Way down vs WT	-3.04323	1.46872	-0.52552	O54724	ATEEPSGTGSDELIKSDQVNGVLVLSLLDK	1xDeamidated [N/Q]; 2xPhospho [T2(100); S10(75.7)]	1xDeamidated [Q18; N20]; 2xPhospho [T2(100); S6(5); T8(19.2); S10(75.7); S16(0.1); S26(0)]	NP_033012	0.00455471	0.000644898	Cavin1	caveolae associated 1	19285	Cavin1	11 D|11 63.95 cM	protein-coding	-1s	24.6785	23.6975	23.7944	23.531	24.1939	25.2243	22.9488	25.2724	24.6009	24.4765
266	280	Q63918_RGNNSAVGSNADLTIEEDEEEEPVALQQAQQVR_1xDeamidated [N/Q]; 1xPhospho [S5(96.9)]_1xDeamidated [N3; N4; N10; Q27; Q28; Q30; Q31]; 1xPhospho [S5(96.9); S9(3.1); T14(0)]	Q63918	Cavin2	5	5	24.084	23.6914	23.8877	0.294855	1.31276	1.31276	6Mo-KO_1Way up vs WT	-1.33339	2.29787	0.3926	Q63918	RGNNSAVGSNADLTIEEDEEEEPVALQQAQQVR	1xDeamidated [N/Q]; 1xPhospho [S5(96.9)]	1xDeamidated [N3; N4; N10; Q27; Q28; Q30; Q31]; 1xPhospho [S5(96.9); S9(3.1); T14(0)]	NP_620080	0.000372846	0.000420153	Cavin2	caveolae associated 2	20324	Cavin2	1|1 C1.1	protein-coding	+1s	23.6289	24.2696	23.9073	24.2541	24.3601	23.1167	24.6081	23.8751	22.8231	24.034
499	281	G5E8J6_KEEDEDESDEDDHHVSR_1xPhospho [S8(100)]_1xPhospho [S8(100); S16(0)]	G5E8J6	Hrc	5	5	20.4561	18.8096	19.6329	0.295672	3.13082	3.13082	6Mo-KO_1Way up vs WT	-3.35675	32.903	1.64654	G5E8J6	KEEDEDESDEDDHHVSR	1xPhospho [S8(100)]	1xPhospho [S8(100); S16(0)]	NP_034603	0.0333128	0.00203657	Hrc	histidine rich calcium binding protein	15464	Hrc	7 B3|7 29.26 cM	protein-coding	+3s	20.2718	21.5777	20.881	17.6864	21.8638	19.0462	14.0266	21.4601	19.2919	20.2232
208	282	P61014_ASTIEMPQQAR_1xPhospho [S2(95)]_1xPhospho [S2(95); T3(5)]	P61014	Pln	5	5	27.1144	26.6833	26.8988	0.295693	1.34822	1.34822	6Mo-KO_1Way up vs WT	-1.37308	2.49586	0.43106	P61014	ASTIEMPQQAR	1xPhospho [S2(95)]	1xPhospho [S2(95); T3(5)]	NP_001135399	0.00119833	0.000420153	Pln	phospholamban	18821	Pln	10|10 B3	protein-coding	+1s	26.5522	26.8848	26.7417	27.8684	27.5249	26.003	27.3061	26.4944	27.442	26.1712
737	283	P70670_GAPNALAESPASPK_1xPhospho [S12(100)]_1xPhospho [S9(0); S12(100)]	P70670	Naca	5	5	23.2618	21.9755	22.6186	0.29632	2.43898	2.43898	6Mo-KO_1Way up vs WT	-2.58226	15.3609	1.28628	P70670	GAPNALAESPASPK	1xPhospho [S12(100)]	1xPhospho [S9(0); S12(100)]	NP_001106670	0.000319392	0.000420153	Naca	nascent polypeptide-associated complex alpha polypeptide	17938	Naca	10|10 D3	protein-coding	+2s	24.762	23.2812	23.4058	22.7036	22.1563	22.476	23.7953	20.896	24.2883	18.4219
1250	284	Q8CC35_LNQEALQTGRPLSPIGHAPGPSVKPTSPSKPGSPK_2xPhospho [S13(99.3); S33(92.7)]_2xPhospho [T8(0.7); S13(99.3); S22(0); T26(0.1); S27(0.2); S29(7.1); S33(92.7)]	Q8CC35	---	5	5	22.3501	22.1277	22.2389	0.296514	1.16672	1.16672	6Mo-KO_1Way up vs WT	-1.17846	1.60416	0.22246	Q8CC35	LNQEALQTGRPLSPIGHAPGPSVKPTSPSKPGSPK	2xPhospho [S13(99.3); S33(92.7)]	2xPhospho [T8(0.7); S13(99.3); S22(0); T26(0.1); S27(0.2); S29(7.1); S33(92.7)]	---	0.0150898	0.00109972	Synpo	synaptopodin	104027	Synpo	18|18 D3- E1	protein-coding	+0.5s	22.0338	22.4212	22.1269	22.2482	22.9205	22.1836	22.4129	22.0059	22.3176	21.7183
1368	285	A2ASS6_QQSPSPIR_2xPhospho [S3(100); S5(100)]_2xPhospho [S3(100); S5(100)]	A2ASS6	---	5	5	19.8551	21.0857	20.4704	0.29698	0.426134	-2.34668	6Mo-KO_1Way down vs WT	-13.6836	2.48481	-1.23062	A2ASS6	QQSPSPIR	2xPhospho [S3(100); S5(100)]	2xPhospho [S3(100); S5(100)]	---	0.0946096	0.00392242	Ttn	titin	22138	Ttn	2 C3|2 45.13 cM	protein-coding	-2s	22.1703	19.6849	18.2223	19.306	19.8919	21.5967	20.8314	23.654	21.2648	18.0816
1251	286	Q8CC35_SSPGLYTAPVQDSLQPTAVSPTYSSDISPVSPSR_1xDeamidated [Q]; 1xPhospho [S/T/Y]_1xDeamidated [Q11; Q15]; 1xPhospho [S1(74.9); S2(23.9); Y6(0); T7(1); S13(0.1); T17(0); S20(0); T22(0); Y23(0); S24(0); S25(0); S28(0); S31(0); S33(0)]	Q8CC35	---	5	5	21.7069	20.8667	21.2868	0.296995	1.79025	1.79025	6Mo-KO_1Way up vs WT	-1.86161	5.96645	0.84016	Q8CC35	SSPGLYTAPVQDSLQPTAVSPTYSSDISPVSPSR	1xDeamidated [Q]; 1xPhospho [S/T/Y]	1xDeamidated [Q11; Q15]; 1xPhospho [S1(74.9); S2(23.9); Y6(0); T7(1); S13(0.1); T17(0); S20(0); T22(0); Y23(0); S24(0); S25(0); S28(0); S31(0); S33(0)]	---	0.0839722	0.00360171	Synpo	synaptopodin	104027	Synpo	18|18 D3- E1	protein-coding	+2s	21.4465	21.8379	21.2251	22.0301	21.9949	21.6045	22.3983	20.502	21.6469	18.182
1092	287	F8WHU5_AESPETSAVESTQSTPQK_1xPhospho [S3(96.9)]_1xPhospho [S3(96.9); T6(2.6); S7(0.5); S11(0); T12(0); S14(0); T15(0)]	F8WHU5	---	5	5	20.8035	20.3775	20.5905	0.297862	1.34358	1.34358	6Mo-KO_1Way up vs WT	-1.37209	2.4769	0.42608	F8WHU5	AESPETSAVESTQSTPQK	1xPhospho [S3(96.9)]	1xPhospho [S3(96.9); T6(2.6); S7(0.5); S11(0); T12(0); S14(0); T15(0)]	---	0.00669986	0.000644898	Pds5b	PDS5 cohesin associated factor B	100710	Pds5b	5|5 G3	protein-coding	+1s	20.7505	20.7305	20.3182	21.6526	20.5659	19.796	19.8559	20.2874	21.5115	20.4365
1001	288	Q64012_LPAPQEDTASEAGTPQGEVQTR_2xPhospho [T8(83.9); T14(99.8)]_2xPhospho [T8(83.9); S10(16.1); T14(99.8); T21(0.2)]	Q64012	Raly	5	5	23.7266	22.7794	23.253	0.297983	1.92813	1.92813	6Mo-KO_1Way up vs WT	-2.02101	7.51347	0.9472	Q64012	LPAPQEDTASEAGTPQGEVQTR	2xPhospho [T8(83.9); T14(99.8)]	2xPhospho [T8(83.9); S10(16.1); T14(99.8); T21(0.2)]	NP_001132983	0.00803936	0.000644898	Raly	hnRNP-associated with lethal yellow	19383	Raly	2 H1|2 76.83 cM	protein-coding	+2s	23.6441	23.8241	23.7679	22.8401	24.5567	23.7639	19.8257	23.6244	22.3541	24.3288
1298	289	Q8CGB6_SPGGHTNSASPRSPVPTTLPGLR_1xDeamidated [N7]; 2xPhospho [S10(97.7); S13(99.2)]_1xDeamidated [N7]; 2xPhospho [S1(0); T6(0); S8(2.3); S10(97.7); S13(99.2); T17(0.4); T18(0.4)]	Q8CGB6	Tns2	5	5	20.5781	21.2901	20.9341	0.298833	0.610456	-1.63812	6Mo-KO_1Way down vs WT	-4.56284	1.70037	-0.71204	Q8CGB6	SPGGHTNSASPRSPVPTTLPGLR	1xDeamidated [N7]; 2xPhospho [S10(97.7); S13(99.2)]	1xDeamidated [N7]; 2xPhospho [S1(0); T6(0); S8(2.3); S10(97.7); S13(99.2); T17(0.4); T18(0.4)]	NP_705761	0.014777	0.00109972	Tns2	tensin 2	209039	Tns2	15 F2|15 57.29 cM	protein-coding	-1s	18.8869	20.9691	21.0892	20.9299	21.0153	21.3808	22.9195	20.0604	20.6387	21.4512
353	290	P11531_GLSPLPSPPEMMPTSPQSPR_2xPhospho [S3(99.7); S7(99.3)]_2xPhospho [S3(99.7); S7(99.3); T14(0.2); S15(0.2); S18(0.7)]	P11531	Dmd	5	5	20.7329	21.4056	21.0693	0.299033	0.627349	-1.59401	6Mo-KO_1Way down vs WT	-4.19723	1.65189	-0.67266	P11531	GLSPLPSPPEMMPTSPQSPR	2xPhospho [S3(99.7); S7(99.3)]	2xPhospho [S3(99.7); S7(99.3); T14(0.2); S15(0.2); S18(0.7)]	NP_031894	0.0409579	0.00237867	Dmd	dystrophin, muscular dystrophy	13405	Dmd	X C1|X 38.38 cM	protein-coding	-1s	21.8683	21.0816	20.4937	20.6315	19.5894	21.304	20.7605	21.1966	20.537	23.2297
1117	291	P14142_TPSLLEQEVKPSTELEYLGPDEND_1xPhospho [S3(88.1)]_1xPhospho [T1(11.9); S3(88.1); S12(0); T13(0); Y17(0)]	P14142	Slc2a4	5	5	27.1554	26.7385	26.947	0.300216	1.33504	1.33504	6Mo-KO_1Way up vs WT	-1.36703	2.43649	0.41688	P14142	TPSLLEQEVKPSTELEYLGPDEND	1xPhospho [S3(88.1)]	1xPhospho [T1(11.9); S3(88.1); S12(0); T13(0); Y17(0)]	NP_033230	0.00227206	0.000420153	Slc2a4	solute carrier family 2 (facilitated glucose transporter), member 4	20528	Slc2a4	11 B3|11 42.93 cM	protein-coding	+1s	27.2774	26.6943	26.8597	27.2774	27.668	26.3503	27.408	26.3703	27.6486	25.9152
184	292	Q8CE04_SNEQMVSEKPSESK_1xPhospho [S1(100)]_1xPhospho [S1(100); S7(0); S11(0); S13(0)]	Q8CE04	Cast	5	5	20.8984	21.1339	21.0161	0.300773	0.849414	-1.17728	6Mo-KO_1Way down vs WT	-1.65437	1.19364	-0.23546	Q8CE04	SNEQMVSEKPSESK	1xPhospho [S1(100)]	1xPhospho [S1(100); S7(0); S11(0); S13(0)]	NP_001288084	0.000210905	0.000420153	Cast	calpastatin	12380	Cast	13|13 C1	protein-coding	-0.5s	20.9174	20.5659	20.5297	21.1387	21.3403	20.8495	21.25	21.1512	21.5967	20.8219
1283	293	A0A087WQ94_SHPGGGPTVPSPGR_1xPhospho [S1(100)]_1xPhospho [S1(100); T8(0); S11(0)]	A0A087WQ94	---	5	5	21.1058	21.5653	21.3356	0.301349	0.727248	-1.37505	6Mo-KO_1Way down vs WT	-2.67308	1.41377	-0.45948	A0A087WQ94	SHPGGGPTVPSPGR	1xPhospho [S1(100)]	1xPhospho [S1(100); T8(0); S11(0)]	---	0.0186015	0.00109972	Tns1	tensin 1	21961	Tns1	1 C3|1 38.17 cM	protein-coding	-1s	20.4134	21.2181	20.3524	21.2684	22.2766	22.1179	21.5926	20.7663	21.8048	21.5447
262	294	Q63918_RGNNSAVGSNADLTIEEDEEEEPVALQQAQQVR_1xDeamidated [N/Q]; 2xPhospho [S5(100); S9(99.8)]_1xDeamidated [N3; N4; N10; Q27; Q28; Q30; Q31]; 2xPhospho [S5(100); S9(99.8); T14(0.2)]	Q63918	Cavin2	5	5	26.522	25.5663	26.0441	0.302597	1.93957	1.93957	6Mo-KO_1Way up vs WT	-2.06279	7.76012	0.95574	Q63918	RGNNSAVGSNADLTIEEDEEEEPVALQQAQQVR	1xDeamidated [N/Q]; 2xPhospho [S5(100); S9(99.8)]	1xDeamidated [N3; N4; N10; Q27; Q28; Q30; Q31]; 2xPhospho [S5(100); S9(99.8); T14(0.2)]	NP_620080	0.000372846	0.000420153	Cavin2	caveolae associated 2	20324	Cavin2	1|1 C1.1	protein-coding	+2s	24.2749	27.0951	27.553	26.7417	26.9455	26.5083	25.6353	23.8017	27.3733	24.5129
1279	295	A0A087WQ94_AVNPTMAAPGSPSLSHR_1xPhospho [S15(98.6)]_1xPhospho [T5(0); S11(1.3); S13(0.2); S15(98.6)]	A0A087WQ94	---	5	5	20.7623	20.3789	20.5706	0.303753	1.30445	1.30445	6Mo-KO_1Way up vs WT	-1.33899	2.27841	0.38344	A0A087WQ94	AVNPTMAAPGSPSLSHR	1xPhospho [S15(98.6)]	1xPhospho [T5(0); S11(1.3); S13(0.2); S15(98.6)]	---	0.0620883	0.00288454	Tns1	tensin 1	21961	Tns1	1 C3|1 38.17 cM	protein-coding	+1s	20.5818	21.0307	20.2388	21.4561	20.5043	20.0604	21.416	20.3402	19.817	20.2609
960	296	Q6GYP7_SQTPSPSTLSR_2xPhospho [T3(100); S5(100)]_2xPhospho [S1(0); T3(100); S5(100); S7(0); T8(0); S10(0)]	Q6GYP7	Ralgapa1	5	5	19.7538	20.2767	20.0153	0.305028	0.695971	-1.43684	6Mo-KO_1Way down vs WT	-3.08063	1.49219	-0.5229	Q6GYP7	SQTPSPSTLSR	2xPhospho [T3(100); S5(100)]	2xPhospho [S1(0); T3(100); S5(100); S7(0); T8(0); S10(0)]	NP_001003719	0.112927	0.00543843	Ralgapa1	Ral GTPase activating protein, alpha subunit 1	56784	Ralgapa1	12|12 C1	protein-coding	-1s	20.0446	20.2812	20.2894	19.2448	18.9091	20.6657	21.3359	20.0156	19.0178	20.3486
252	297	Q63918_LEDQMQEDREEGSFTEGLSEASLPSGLMEGSAEDAEK_1xDeamidated [Q]; 1xPhospho [S/T]_1xDeamidated [Q4; Q6]; 1xPhospho [S13(47.8); T15(47.8); S19(3.9); S22(0.4); S25(0); S31(0)]	Q63918	Cavin2	5	5	22.0819	21.2621	21.672	0.30632	1.76519	1.76519	6Mo-KO_1Way up vs WT	-1.87937	5.85588	0.81982	Q63918	LEDQMQEDREEGSFTEGLSEASLPSGLMEGSAEDAEK	1xDeamidated [Q]; 1xPhospho [S/T]	1xDeamidated [Q4; Q6]; 1xPhospho [S13(47.8); T15(47.8); S19(3.9); S22(0.4); S25(0); S31(0)]	NP_620080	0.0673262	0.00288454	Cavin2	caveolae associated 2	20324	Cavin2	1|1 C1.1	protein-coding	+2s	22.273	21.8172	20.7876	22.725	22.8067	21.2715	23.4345	19.6079	20.3121	21.6844
1094	298	Q9DC77_KESTPETEEGAPTTSEEK_1xPhospho [S3(96.1)]_1xPhospho [S3(96.1); T4(3.8); T7(0.1); T13(0); T14(0); S15(0)]	Q9DC77	Smpx	5	5	19.7017	19.0401	19.3709	0.306985	1.58175	1.58175	6Mo-KO_1Way up vs WT	-1.66618	4.16866	0.66152	Q9DC77	KESTPETEEGAPTTSEEK	1xPhospho [S3(96.1)]	1xPhospho [S3(96.1); T4(3.8); T7(0.1); T13(0); T14(0); S15(0)]	NP_001239520	0.0187315	0.00109972	Smpx	small muscle protein, X-linked	66106	Smpx	X|X F4	protein-coding	+1s	19.4183	18.8498	19.6106	20.1094	20.5202	18.8148	17.956	19.9156	20.6014	17.9129
494	299	G5E8J6_YQDHEEEDDGDSDEDSHTHR_1xPhospho [S16(98)]_1xPhospho [Y1(0); S12(0.1); S16(98); T18(2)]	G5E8J6	Hrc	5	5	19.899	19.2262	19.5626	0.308338	1.59419	1.59419	6Mo-KO_1Way up vs WT	-1.68575	4.2842	0.67282	G5E8J6	YQDHEEEDDGDSDEDSHTHR	1xPhospho [S16(98)]	1xPhospho [Y1(0); S12(0.1); S16(98); T18(2)]	NP_034603	0.0879687	0.00360171	Hrc	histidine rich calcium binding protein	15464	Hrc	7 B3|7 29.26 cM	protein-coding	+1s	18.0851	20.3658	20.1594	20.2123	20.6726	18.6368	18.6902	20.0357	18.3748	20.3936
1462	300	A0A0R4J0D5_SYEDLTELEDR_1xPhospho [S1(100)]_1xPhospho [S1(100); Y2(0); T6(0)]	A0A0R4J0D5	Mon1a	5	5	20.8337	21.3484	21.091	0.308484	0.699958	-1.42866	6Mo-KO_1Way down vs WT	-3.04398	1.49137	-0.51466	A0A0R4J0D5	SYEDLTELEDR	1xPhospho [S1(100)]	1xPhospho [S1(100); Y2(0); T6(0)]	NP_082645	0.00586392	0.000644898	Mon1a	MON1 homolog A, secretory traffciking associated	72825	Mon1a	9|9 F1	protein-coding	-1s	20.737	21.3224	21.1843	21.2399	19.6849	21.268	22.7313	20.7468	20.7779	21.2178
1030	301	E9PUK6_RSPSPAPPPPPPPPPPR_2xPhospho [S2(100); S4(100)]_2xPhospho [S2(100); S4(100)]	E9PUK6	Srrm1	5	5	21.7536	22.0826	21.9181	0.308826	0.796055	-1.25619	6Mo-KO_1Way down vs WT	-2.03826	1.29165	-0.32906	E9PUK6	RSPSPAPPPPPPPPPPR	2xPhospho [S2(100); S4(100)]	2xPhospho [S2(100); S4(100)]	NP_058079	2.53813e-05	0.000420153	Srrm1	serine/arginine repetitive matrix 1	51796	Srrm1	4|4 D3	protein-coding	-0.5s	22.3538	21.8557	22.138	21.5029	20.9174	22.3303	21.5843	21.8903	22.0711	22.5371
1320	302	A2ASS6_QQSPSPIRHSPSPVR_3xPhospho [S3(100); S10(100); S12(100)]_3xPhospho [S3(100); S5(0); S10(100); S12(100)]	A2ASS6	---	5	5	25.1803	25.8665	25.5234	0.311039	0.621489	-1.60904	6Mo-KO_1Way down vs WT	-4.43667	1.71366	-0.6862	A2ASS6	QQSPSPIRHSPSPVR	3xPhospho [S3(100); S10(100); S12(100)]	3xPhospho [S3(100); S5(0); S10(100); S12(100)]	---	0.00633431	0.000644898	Ttn	titin	22138	Ttn	2 C3|2 45.13 cM	protein-coding	-1s	25.6026	25.8696	25.9565	24.619	23.854	26.7661	24.6699	26.7245	24.6949	26.4773
152	303	P59017_KKSHTGEAAAVR_1xPhospho [S3(99.6)]_1xPhospho [S3(99.6); T5(0.4)]	P59017	Bcl2l13	5	5	20.96	22.6274	21.7937	0.312582	0.314807	-3.17655	6Mo-KO_1Way down vs WT	-37.6701	3.73324	-1.66746	P59017	KKSHTGEAAAVR	1xPhospho [S3(99.6)]	1xPhospho [S3(99.6); T5(0.4)]	NP_705736	0.00146938	0.000420153	Bcl2l13	BCL2-like 13 (apoptosis facilitator)	94044	Bcl2l13	6 F1|6 57.01 cM	protein-coding	-3s	21.9204	20.5461	21.5485	17.1407	23.6441	22.4903	23.941	23.7211	18.3997	24.585
992	304	Q9ES28_MSGFIYQGK_1xOxidation [M1]; 1xPhospho [S2(100)]_1xOxidation [M1]; 1xPhospho [S2(100); Y6(0)]	Q9ES28	Arhgef7	5	5	22.3506	22.0096	22.1801	0.313494	1.26662	1.26662	6Mo-KO_1Way up vs WT	-1.31048	2.10242	0.34098	Q9ES28	MSGFIYQGK	1xOxidation [M1]; 1xPhospho [S2(100)]	1xOxidation [M1]; 1xPhospho [S2(100); Y6(0)]	NP_001106989	0.00142863	0.000420153	Arhgef7	Rho guanine nucleotide exchange factor (GEF7)	54126	Arhgef7	8|8 A1.1	protein-coding	+0.5s	22.0415	22.094	22.0338	22.931	22.6527	21.7281	22.1247	21.6727	22.964	21.5586
663	305	Q14BI5_VSASEEEEVENENR_1xPhospho [S2(99)]_1xPhospho [S2(99); S4(1)]	Q14BI5	Myom2	5	5	23.2876	23.0069	23.1472	0.313642	1.21477	1.21477	6Mo-KO_1Way up vs WT	-1.24946	1.84378	0.28068	Q14BI5	VSASEEEEVENENR	1xPhospho [S2(99)]	1xPhospho [S2(99); S4(1)]	NP_032690	0.000168395	0.000420153	Myom2	myomesin 2	17930	Myom2	8|8 A1.1	protein-coding	+0.5s	23.1582	23.4222	23.369	23.6565	22.832	22.6452	22.8964	22.9346	23.8628	22.6955
610	306	A2AJI1_ARPSSPSTTWHRPASPCPSPGPGHALPPKPPSPR_1xCarbamidomethyl [C17]; 3xPhospho [S15(98.6); S32(100); S/T]_1xCarbamidomethyl [C17]; 3xPhospho [S4(20); S5(20); S7(20); T8(20); T9(20); S15(98.6); S19(1.3); S32(100)]	A2AJI1	Map7d1	5	5	23.6389	22.5519	23.0954	0.314932	2.12426	2.12426	6Mo-KO_1Way up vs WT	-2.37993	10.7394	1.08696	A2AJI1	ARPSSPSTTWHRPASPCPSPGPGHALPPKPPSPR	1xCarbamidomethyl [C17]; 3xPhospho [S15(98.6); S32(100); S/T]	1xCarbamidomethyl [C17]; 3xPhospho [S4(20); S5(20); S7(20); T8(20); T9(20); S15(98.6); S19(1.3); S32(100)]	NP_001139442	0.000891869	0.000420153	Map7d1	MAP7 domain containing 1	245877	Map7d1	4|4 D2.2	protein-coding	+2s	24.5567	23.7454	23.662	21.2548	24.9755	21.5269	24.4478	24.4039	21.665	20.716
994	307	Q80YR9_SRSPLGFYVHLK_2xPhospho [S1(100); S3(100)]_2xPhospho [S1(100); S3(100); Y8(0)]	Q80YR9	Rbm12b1	5	5	20.5281	21.2193	20.8737	0.315286	0.619347	-1.6146	6Mo-KO_1Way down vs WT	-4.52828	1.73701	-0.69118	Q80YR9	SRSPLGFYVHLK	2xPhospho [S1(100); S3(100)]	2xPhospho [S1(100); S3(100); Y8(0)]	NP_082502	0.0133069	0.00109972	Rbm12b1	RNA binding motif protein 12 B1	72397	Rbm12b1	4|4 A1	protein-coding	-1s	20.6414	18.6394	21.3142	20.3062	21.7392	21.5843	20.6833	20.5478	20.8083	22.4726
655	308	V9GWW6_SLSSGSLTTGSTEQEHQASAASYQPCHLPFFSK_1xCarbamidomethyl [C26]; 1xDeamidated [Q]; 2xPhospho [S4(86.4); S/T/Y]_1xCarbamidomethyl [C26]; 1xDeamidated [Q17; Q24]; 2xPhospho [S1(26.1); S3(73.3); S4(86.4); S6(11.8); T8(0.9); T9(0.9); S11(0.2); T12(0.4); S19(0¬'╓$b*	V9GWW6	---	5	5	21.8004	22.4801	22.1403	0.317821	0.624278	-1.60185	6Mo-KO_1Way down vs WT	-4.44166	1.73102	-0.67974	V9GWW6	SLSSGSLTTGSTEQEHQASAASYQPCHLPFFSK	1xCarbamidomethyl [C26]; 1xDeamidated [Q]; 2xPhospho [S4(86.4); S/T/Y]	1xCarbamidomethyl [C26]; 1xDeamidated [Q17; Q24]; 2xPhospho [S1(26.1); S3(73.3); S4(86.4); S6(11.8); T8(0.9); T9(0.9); S11(0.2); T12(0.4); S19(0¬'╓$b*	---	0.0401223	0.00237867	Mlip	muscular LMNA-interacting protein	69642	Mlip	9|9 D	protein-coding	-1s	22.5941	22.4092	20.8677	20.7415	22.3894	22.4173	21.4992	22.6647	21.5993	24.2201
1434	309	Q3U1U6_AKVETPPLSASPPQQRPPGPGTGDSAQTLPSLR_2xPhospho [T5(100); S11(80.6)]_2xPhospho [T5(100); S9(19.4); S11(80.6); T22(0); S25(0); T28(0); S31(0)]	Q3U1U6	Tsc22d4	5	5	24.5464	24.3508	24.4486	0.318879	1.1452	1.1452	6Mo-KO_1Way up vs WT	-1.17185	1.53686	0.1956	Q3U1U6	AKVETPPLSASPPQQRPPGPGTGDSAQTLPSLR	2xPhospho [T5(100); S11(80.6)]	2xPhospho [T5(100); S9(19.4); S11(80.6); T22(0); S25(0); T28(0); S31(0)]	NP_084081	0.0180902	0.00109972	Tsc22d4	TSC22 domain family, member 4	78829	Tsc22d4	5|5 G2	protein-coding	+0.5s	24.4486	24.71	24.0426	24.4815	25.0493	24.5482	24.4423	24.2834	24.0762	24.4039
1005	310	E9Q401_ISQTSQVSIDAAHGYSPR_1xPhospho [S2(96.8)]_1xPhospho [S2(96.8); T4(2.6); S5(0.5); S8(0.1); Y15(0); S16(0)]	E9Q401	Ryr2	5	5	20.927	20.2011	20.5641	0.319729	1.65389	1.65389	6Mo-KO_1Way up vs WT	-1.80494	4.93713	0.72586	E9Q401	ISQTSQVSIDAAHGYSPR	1xPhospho [S2(96.8)]	1xPhospho [S2(96.8); T4(2.6); S5(0.5); S8(0.1); Y15(0); S16(0)]	NP_076357	0.00220908	0.000420153	Ryr2	ryanodine receptor 2, cardiac	20191	Ryr2	13 A1|13 4.38 cM	protein-coding	+1s	20.9548	20.6873	20.0998	21.0867	21.8063	19.5793	21.4259	20.3936	21.474	18.1328
359	311	A2AN08_TVPSPPISPQALVEGENDEQSSPDQVSAAK_2xPhospho [T1(99.9); S4(99.5)]_2xPhospho [T1(99.9); S4(99.5); S8(0.6); S21(0); S22(0); S27(0)]	A2AN08	Ubr4	5	5	20.4471	19.6107	20.0289	0.32004	1.78561	1.78561	6Mo-KO_1Way up vs WT	-1.97653	6.302	0.83642	A2AN08	TVPSPPISPQALVEGENDEQSSPDQVSAAK	2xPhospho [T1(99.9); S4(99.5)]	2xPhospho [T1(99.9); S4(99.5); S8(0.6); S21(0); S22(0); S27(0)]	NP_001153791	0.0545815	0.00252693	Ubr4	ubiquitin protein ligase E3 component n-recognin 4	69116	Ubr4	4|4 D3	protein-coding	+2s	21.1411	20.8906	20.5659	21.7674	17.8704	19.4386	20.1704	18.0816	20.327	20.0357
1174	312	Q5U4C3_APSPAPAVSPKR_2xPhospho [S3(100); S9(100)]_2xPhospho [S3(100); S9(100)]	Q5U4C3	Scaf1	5	5	22.8772	23.4845	23.1808	0.320475	0.656424	-1.52341	6Mo-KO_1Way down vs WT	-3.80942	1.64145	-0.6073	Q5U4C3	APSPAPAVSPKR	2xPhospho [S3(100); S9(100)]	2xPhospho [S3(100); S9(100)]	NP_001008422	0.0130308	0.00109972	Scaf1	SR-related CTD-associated factor 1	233208	Scaf1	7|7 B3	protein-coding	-1s	23.3431	22.1109	22.7398	23.1147	23.0776	23.5017	22.7492	23.0535	22.5981	25.5201
1377	313	A2ASS6_TPSPDYDLYYYR_1xPhospho [S3(99.2)]_1xPhospho [T1(0.8); S3(99.2); Y6(0); Y9(0); Y10(0); Y11(0)]	A2ASS6	---	5	5	23.4893	23.0759	23.2826	0.321782	1.33178	1.33178	6Mo-KO_1Way up vs WT	-1.40371	2.48968	0.41336	A2ASS6	TPSPDYDLYYYR	1xPhospho [S3(99.2)]	1xPhospho [T1(0.8); S3(99.2); Y6(0); Y9(0); Y10(0); Y11(0)]	---	0.000490528	0.000420153	Ttn	titin	22138	Ttn	2 C3|2 45.13 cM	protein-coding	+1s	23.1147	23.1958	22.8146	24.2696	24.0516	22.4574	23.6009	22.916	23.8115	22.5937
669	314	Q5DTJ9_TPVDESDDEIEHDEIPTGK_1xPhospho [S6(100)]_1xPhospho [T1(0); S6(100); T17(0)]	Q5DTJ9	Mypn	5	5	20.7137	21.3653	21.0395	0.322625	0.636574	-1.57091	6Mo-KO_1Way down vs WT	-4.21947	1.70984	-0.6516	Q5DTJ9	TPVDESDDEIEHDEIPTGK	1xPhospho [S6(100)]	1xPhospho [T1(0); S6(100); T17(0)]	NP_892037	0.0502972	0.00252693	Mypn	myopalladin	68802	Mypn	10|10 B4	protein-coding	-1s	21.0222	21.6737	21.6348	20.4725	18.7653	21.4084	20.2874	21.1999	21.8903	22.0405
1311	315	Q569Z6_KSPVGKSPPATGSAYGSSQK_2xPhospho [S2(100); S7(100)]_2xPhospho [S2(100); S7(100); T11(0); S13(0); Y15(0); S17(0); S18(0)]	Q569Z6	Thrap3	5	5	19.8476	20.1137	19.9807	0.323367	0.831541	-1.20259	6Mo-KO_1Way down vs WT	-1.80164	1.24576	-0.26614	Q569Z6	KSPVGKSPPATGSAYGSSQK	2xPhospho [S2(100); S7(100)]	2xPhospho [S2(100); S7(100); T11(0); S13(0); Y15(0); S17(0); S18(0)]	NP_666265	0.00651453	0.000644898	Thrap3	thyroid hormone receptor associated protein 3	230753	Thrap3	4|4 D2.2	protein-coding	-0.5s	20.3298	19.9344	20.1178	19.5181	19.3377	20.589	19.5587	20.303	20.163	19.9548
1042	316	E9PUK6_RLSPSASPPR_2xPhospho [S3(99.9); S7(99.9)]_2xPhospho [S3(99.9); S5(0.2); S7(99.9)]	E9PUK6	Srrm1	5	5	25.8609	25.7272	25.794	0.32407	1.0971	1.0971	6Mo-KO_1Way up vs WT	-1.11707	1.34455	0.1337	E9PUK6	RLSPSASPPR	2xPhospho [S3(99.9); S7(99.9)]	2xPhospho [S3(99.9); S5(0.2); S7(99.9)]	NP_058079	0.000438318	0.000420153	Srrm1	serine/arginine repetitive matrix 1	51796	Srrm1	4|4 D3	protein-coding	+0.5s	26.237	25.7256	25.9379	25.7256	25.6785	25.9812	25.5304	25.7461	25.6943	25.6841
1049	317	Q8BTI8_NHSGSRTPPVALSSSR_2xPhospho [S3(99.8); T7(99.8)]_2xPhospho [S3(99.8); S5(0.5); T7(99.8); S13(0); S14(0); S15(0)]	Q8BTI8	Srrm2	5	5	25.3353	24.6422	24.9887	0.324076	1.61669	1.61669	6Mo-KO_1Way up vs WT	-1.77513	4.63962	0.69304	Q8BTI8	NHSGSRTPPVALSSSR	2xPhospho [S3(99.8); T7(99.8)]	2xPhospho [S3(99.8); S5(0.5); T7(99.8); S13(0); S14(0); S15(0)]	NP_780438	0.0102009	0.000644898	Srrm2	serine/arginine repetitive matrix 2	75956	Srrm2	17|17 A3.3	protein-coding	+1s	26.0593	24.5139	26.0485	25.5834	24.4712	26.075	23.6404	25.7037	23.2297	24.5623
403	318	Q8BZ52_ASEEYECYVIPEEEDEEEPADVFCITCK_3xCarbamidomethyl [C7; C24; C27]; 1xPhospho [S2(100)]_3xCarbamidomethyl [C7; C24; C27]; 1xPhospho [S2(100); Y5(0); Y8(0); T26(0)]	Q8BZ52	Fsd2	5	5	19.7811	20.3436	20.0623	0.324409	0.67709	-1.47691	6Mo-KO_1Way down vs WT	-3.47772	1.59436	-0.56258	Q8BZ52	ASEEYECYVIPEEEDEEEPADVFCITCK	3xCarbamidomethyl [C7; C24; C27]; 1xPhospho [S2(100)]	3xCarbamidomethyl [C7; C24; C27]; 1xPhospho [S2(100); Y5(0); Y8(0); T26(0)]	NP_766492	0.0270709	0.00132202	Fsd2	fibronectin type III and SPRY domain containing 2	244091	Fsd2	7|7 D3	protein-coding	-1s	19.4714	19.1599	20.652	19.5894	20.0326	20.4004	20.7468	18.6902	21.5687	20.3121
1151	319	B2RXQ9_SHSDNGTDAFKEVPSPVPPPHVPPRPR_2xPhospho [S3(84.2); S15(100)]_2xPhospho [S1(15.7); S3(84.2); T7(0.1); S15(100)]	B2RXQ9	Sorbs2	5	5	20.6244	20.9978	20.8111	0.32533	0.771972	-1.29538	6Mo-KO_1Way down vs WT	-2.28957	1.36445	-0.37338	B2RXQ9	SHSDNGTDAFKEVPSPVPPPHVPPRPR	2xPhospho [S3(84.2); S15(100)]	2xPhospho [S1(15.7); S3(84.2); T7(0.1); S15(100)]	NP_001297636	2.52034e-05	0.000420153	Sorbs2	sorbin and SH3 domain containing 2	234214	Sorbs2	8|8 B1.1	protein-coding	-0.5s	20.652	19.8285	20.5202	20.9747	21.1468	21.8011	20.7999	20.9181	20.1563	21.3137
1002	320	H3BJN8_EQFMENHHPGNSATPVANIISVET_2xDeamidated [N/Q]; 1xOxidation [M4]; 1xPhospho [T14(94.1)]_2xDeamidated [Q2; N6; N11; N18]; 1xOxidation [M4]; 1xPhospho [S12(4.1); T14(94.1); S21(0.9); T24(0.9)]	H3BJN8	---	5	5	27.3449	27.6896	27.5173	0.32606	0.787461	-1.2699	6Mo-KO_1Way down vs WT	-2.15034	1.33341	-0.34472	H3BJN8	EQFMENHHPGNSATPVANIISVET	2xDeamidated [N/Q]; 1xOxidation [M4]; 1xPhospho [T14(94.1)]	2xDeamidated [Q2; N6; N11; N18]; 1xOxidation [M4]; 1xPhospho [S12(4.1); T14(94.1); S21(0.9); T24(0.9)]	---	0.0862346	0.00360171	Rwdd4a	RWD domain containing 4A	192174	Rwdd4a	8|8 B1.1	protein-coding	-0.5s	27.9362	27.4887	27.5803	26.8597	26.8597	28.3115	27.8444	27.7797	26.7661	27.7465
1295	321	Q8CGB6_LSPGEALPSVVQGVAEK_1xPhospho [S2(100)]_1xPhospho [S2(100); S9(0)]	Q8CGB6	Tns2	5	5	21.1719	20.6808	20.9263	0.326242	1.40552	1.40552	6Mo-KO_1Way up vs WT	-1.50716	2.97736	0.4911	Q8CGB6	LSPGEALPSVVQGVAEK	1xPhospho [S2(100)]	1xPhospho [S2(100); S9(0)]	NP_705761	0.0138767	0.00109972	Tns2	tensin 2	209039	Tns2	15 F2|15 57.29 cM	protein-coding	+1s	20.5936	21.2996	20.8524	21.9339	21.1798	19.9481	20.6951	20.5313	22.2195	20.0098
24	322	E9Q777_KPESPYGHLSDAPDSPRPVMTSEDSGLFSPIR_2xPhospho [S4(99.7); T/S/Y]_2xPhospho [S4(99.7); Y6(0); S10(2.1); S15(14.4); T21(41.3); S22(41.3); S25(0.8); S29(0.3)]	E9Q777	Akap11	5	5	20.377	19.88	20.1285	0.32809	1.41126	1.41126	6Mo-KO_1Way up vs WT	-1.51928	3.02586	0.49698	E9Q777	KPESPYGHLSDAPDSPRPVMTSEDSGLFSPIR	2xPhospho [S4(99.7); T/S/Y]	2xPhospho [S4(99.7); Y6(0); S10(2.1); S15(14.4); T21(41.3); S22(41.3); S25(0.8); S29(0.3)]	NP_001333713	0.146914	0.00826345	Akap11	A kinase (PRKA) anchor protein 11	219181	Akap11	14|14 D3	protein-coding	+1s	20.5511	20.516	20.5043	20.7876	19.5261	21.141	18.6605	20.4365	19.7031	19.4591
1436	323	A2AQ07_AGLEDSEEDVEEAEVEAEDKDH_1xPhospho [S6(100)]_1xPhospho [S6(100)]	A2AQ07	Tubb1	5	5	22.069	21.4391	21.754	0.329292	1.54746	1.54746	6Mo-KO_1Way up vs WT	-1.70345	4.07912	0.6299	A2AQ07	AGLEDSEEDVEEAEVEAEDKDH	1xPhospho [S6(100)]	1xPhospho [S6(100)]	NP_001074440	0.0418104	0.00237867	Tubb1	tubulin, beta 1 class VI	545486	Tubb1	2|2 H4	protein-coding	+1s	21.3818	22.4286	22.0398	22.172	22.3228	21.3398	22.6866	19.3787	21.4211	22.3693
153	324	A2AG58_SYVNRSPSPNVKPVEK_2xPhospho [S6(100); S8(100)]_2xPhospho [S1(0); Y2(0); S6(100); S8(100)]	A2AG58	Bclaf3	5	5	20.7464	20.2342	20.4903	0.329389	1.42622	1.42622	6Mo-KO_1Way up vs WT	-1.54233	3.13727	0.5122	A2AG58	SYVNRSPSPNVKPVEK	2xPhospho [S6(100); S8(100)]	2xPhospho [S1(0); Y2(0); S6(100); S8(100)]	NP_001028644	0.0124955	0.000953527	Bclaf3	Bclaf1 and Thrap3 family member 3	382252	Bclaf3	X|X F4	protein-coding	+1s	20.5008	20.8167	20.5757	19.9266	21.9122	21.2877	19.2772	20.1983	19.6079	20.7999
1254	325	Q8CC35_VASLSPARTPPASLYHGYLPENGVLRPEPTK_1xDeamidated [N22]; 2xPhospho [S3(99.2); S5(99.8)]_1xDeamidated [N22]; 2xPhospho [S3(99.2); S5(99.8); T9(1); S13(0); Y15(0); Y18(0); T30(0)]	Q8CC35	---	5	5	28.1072	27.809	27.9581	0.330042	1.22964	1.22964	6Mo-KO_1Way up vs WT	-1.28783	1.94722	0.29824	Q8CC35	VASLSPARTPPASLYHGYLPENGVLRPEPTK	1xDeamidated [N22]; 2xPhospho [S3(99.2); S5(99.8)]	1xDeamidated [N22]; 2xPhospho [S3(99.2); S5(99.8); T9(1); S13(0); Y15(0); Y18(0); T30(0)]	---	0.000158064	0.000420153	Synpo	synaptopodin	104027	Synpo	18|18 D3- E1	protein-coding	+0.5s	27.7155	27.9362	27.6037	28.1394	29.1413	27.7186	28.1012	27.6712	27.9053	27.6486
299	326	E9Q6L0_NSSNTGVGSPSNTIGR_1xPhospho [S9(99)]_1xPhospho [S2(0); S3(0); T5(0); S9(99); S11(1); T13(0)]	E9Q6L0	Clasp1	5	5	21.6129	21.3362	21.4746	0.3302	1.2114	1.2114	6Mo-KO_1Way up vs WT	-1.26468	1.85591	0.27668	E9Q6L0	NSSNTGVGSPSNTIGR	1xPhospho [S9(99)]	1xPhospho [S2(0); S3(0); T5(0); S9(99); S11(1); T13(0)]	NP_001280230	0.000105852	0.000420153	Clasp1	CLIP associating protein 1	76707	Clasp1	1|1 E2.3	protein-coding	+0.5s	20.7816	21.6056	21.3554	22.3201	22.0017	21.3508	21.299	21.3473	21.4259	21.258
836	327	Q99L43_LDGETASDSESR_1xPhospho [S/T]_1xPhospho [T5(0.1); S7(47.4); S9(47.4); S11(5.1)]	Q99L43	Cds2	5	5	22.5843	21.6657	22.125	0.33035	1.89025	1.89025	6Mo-KO_1Way up vs WT	-2.18161	7.79501	0.91858	Q99L43	LDGETASDSESR	1xPhospho [S/T]	1xPhospho [T5(0.1); S7(47.4); S9(47.4); S11(5.1)]	NP_001277968	0.000454007	0.000420153	Cds2	CDP-diacylglycerol synthase (phosphatidate cytidylyltransferase) 2	110911	Cds2	2 F2|2 64.15 cM	protein-coding	+2s	22.2698	23.2693	22.8278	22.3827	22.172	18.5928	21.9881	22.8486	23.6115	21.2877
1292	328	Q8CGB6_WDSYENFNQHHEDSVDGALAHTR_2xPhospho [S3(99.9); S14(99.9)]_2xPhospho [S3(99.9); Y4(0.1); S14(99.9); T22(0.1)]	Q8CGB6	Tns2	5	5	24.1832	23.8633	24.0233	0.330975	1.24824	1.24824	6Mo-KO_1Way up vs WT	-1.31303	2.04585	0.3199	Q8CGB6	WDSYENFNQHHEDSVDGALAHTR	2xPhospho [S3(99.9); S14(99.9)]	2xPhospho [S3(99.9); Y4(0.1); S14(99.9); T22(0.1)]	NP_705761	0.00191937	0.000420153	Tns2	tensin 2	209039	Tns2	15 F2|15 57.29 cM	protein-coding	+0.5s	24.4905	23.9256	24.4544	23.3482	24.6975	23.934	24.0516	23.8628	24.3003	23.168
819	329	Q99JF8_NLAKPGVTSTSDSEDEDDQEGEKKR_2xPhospho [T8(79.3); S11(90.4)]_2xPhospho [T8(79.3); S9(17.8); T10(7.9); S11(90.4); S13(4.5)]	Q99JF8	Psip1	5	5	20.9587	21.5386	21.2487	0.331184	0.669019	-1.49472	6Mo-KO_1Way down vs WT	-3.66182	1.63898	-0.57988	Q99JF8	NLAKPGVTSTSDSEDEDDQEGEKKR	2xPhospho [T8(79.3); S11(90.4)]	2xPhospho [T8(79.3); S9(17.8); T10(7.9); S11(90.4); S13(4.5)]	NP_001277456	0.0089302	0.000644898	Psip1	PC4 and SFRS1 interacting protein 1	101739	Psip1	4|4 C3	protein-coding	-1s	19.8285	21.1025	21.0867	21.6348	21.1411	20.7424	22.0089	20.5717	21.2221	23.1479
485	330	P51859_GSAEGSSDEEGKLVIDEPAKEK_2xPhospho [S6(98.6); S7(94.5)]_2xPhospho [S2(6.9); S6(98.6); S7(94.5)]	P51859	Hdgf	5	5	22.3466	23.5438	22.9452	0.331451	0.436097	-2.29307	6Mo-KO_1Way down vs WT	-14.5995	2.77654	-1.19728	P51859	GSAEGSSDEEGKLVIDEPAKEK	2xPhospho [S6(98.6); S7(94.5)]	2xPhospho [S2(6.9); S6(98.6); S7(94.5)]	NP_032257	0.00167938	0.000420153	Hdgf	heparin binding growth factor	15191	Hdgf	3 F1|3 38.78 cM	protein-coding	-2s	23.3597	23.531	23.741	21.8063	19.2948	24.2323	23.6842	23.673	20.6281	25.5016
788	331	A2APD7_EEVASEPEEAASPTTPK_2xPhospho [S5(100); T15(97.2)]_2xPhospho [S5(100); S12(1.4); T14(1.4); T15(97.2)]	A2APD7	---	5	5	21.6867	21.3321	21.5094	0.332303	1.27867	1.27867	6Mo-KO_1Way up vs WT	-1.35461	2.21477	0.35464	A2APD7	EEVASEPEEAASPTTPK	2xPhospho [S5(100); T15(97.2)]	2xPhospho [S5(100); S12(1.4); T14(1.4); T15(97.2)]	---	0.0304513	0.00157378	Nop56	NOP56 ribonucleoprotein	67134	Nop56	2|2 F1	protein-coding	+0.5s	21.6348	21.686	21.8219	21.3082	21.9827	21.4211	22.4428	20.7779	20.589	21.4296
604	332	A2AJI1_GPTPTATGPR_1xPhospho [T3(98.3)]_1xPhospho [T3(98.3); T5(1.5); T7(0.2)]	A2AJI1	Map7d1	5	5	20.1357	20.6985	20.4171	0.332947	0.676978	-1.47715	6Mo-KO_1Way down vs WT	-3.53656	1.6208	-0.56282	A2AJI1	GPTPTATGPR	1xPhospho [T3(98.3)]	1xPhospho [T3(98.3); T5(1.5); T7(0.2)]	NP_001139442	0.0769982	0.00360171	Map7d1	MAP7 domain containing 1	245877	Map7d1	4|4 D2.2	protein-coding	-1s	19.9781	19.8514	20.0824	20.6071	20.1594	20.303	19.5341	20.3613	20.5959	22.6982
1439	333	Q9CZX7_SPLLSASHSGNVTPTAPPYLQESSPR_2xPhospho [S5(99.7); S7(99.4)]_2xPhospho [S1(0.1); S5(99.7); S7(99.4); S9(0.4); T13(0.2); T15(0.1); Y19(0); S23(0); S24(0)]	Q9CZX7	Pip4p2	5	5	23.1458	22.9202	23.033	0.333549	1.16926	1.16926	6Mo-KO_1Way up vs WT	-1.21414	1.65994	0.2256	Q9CZX7	SPLLSASHSGNVTPTAPPYLQESSPR	2xPhospho [S5(99.7); S7(99.4)]	2xPhospho [S1(0.1); S5(99.7); S7(99.4); S9(0.4); T13(0.2); T15(0.1); Y19(0); S23(0); S24(0)]	NP_082540	0.000673166	0.000420153	Pip4p2	phosphatidylinositol-4,5-bisphosphate 4-phosphatase 2	72519	Pip4p2	4|4 A1	protein-coding	+0.5s	22.9694	23.0495	22.9471	23.232	23.531	23.4482	22.6163	23.168	22.3829	22.9856
272	334	A2AMM0_LSSVTEDEDQDAALTIVTVLDR_1xPhospho [S3(82.8)]_1xPhospho [S2(14.5); S3(82.8); T5(2.7); T15(0); T18(0)]	A2AMM0	Cavin4	5	5	20.8308	21.3193	21.0751	0.334599	0.712756	-1.403	6Mo-KO_1Way down vs WT	-3.00163	1.52489	-0.48852	A2AMM0	LSSVTEDEDQDAALTIVTVLDR	1xPhospho [S3(82.8)]	1xPhospho [S2(14.5); S3(82.8); T5(2.7); T15(0); T18(0)]	NP_080785	0.00167938	0.000420153	Cavin4	caveolae associated 4	68016	Cavin4	4|4 B1	protein-coding	-1s	20.3004	21.5598	20.7816	21.1266	20.3854	20.5959	22.8526	21.0349	21.4649	20.6481
1028	335	E9PUK6_RESPSPAPKPR_2xPhospho [S3(100); S5(100)]_2xPhospho [S3(100); S5(100)]	E9PUK6	Srrm1	5	5	24.797	25.2307	25.0139	0.334781	0.740361	-1.35069	6Mo-KO_1Way down vs WT	-2.65404	1.45477	-0.4337	E9PUK6	RESPSPAPKPR	2xPhospho [S3(100); S5(100)]	2xPhospho [S3(100); S5(100)]	NP_058079	0.0420984	0.00237867	Srrm1	serine/arginine repetitive matrix 1	51796	Srrm1	4|4 D3	protein-coding	-1s	25.2099	24.6556	25.2424	24.8298	24.0472	25.1465	24.8468	26.54	25.2555	24.3646
848	336	Q9CQ73_RPPGCGSFSDAVFDNGPLKPTMPTHPPGTSHSAGSLLEETTVR_1xCarbamidomethyl [C5]; 1xDeamidated [N15]; 2xPhospho [S32(91.8); S35(93.1)]_1xCarbamidomethyl [C5]; 1xDeamidated [N15]; 2xPhospho [S7(0); S9(0); T21(0); T24(0); T29(0.2); S30(6.1); S32(91.8); S35(93.1); T¬'╓$b*	Q9CQ73	Pkp2	5	5	20.4702	21.6611	21.0657	0.335017	0.43803	-2.28295	6Mo-KO_1Way down vs WT	-14.6026	2.80179	-1.1909	Q9CQ73	RPPGCGSFSDAVFDNGPLKPTMPTHPPGTSHSAGSLLEETTVR	1xCarbamidomethyl [C5]; 1xDeamidated [N15]; 2xPhospho [S32(91.8); S35(93.1)]	1xCarbamidomethyl [C5]; 1xDeamidated [N15]; 2xPhospho [S7(0); S9(0); T21(0); T24(0); T29(0.2); S30(6.1); S32(91.8); S35(93.1); T¬'╓$b*	NP_080439	0.0479495	0.00237867	Pkp2	plakophilin 2	67451	Pkp2	16|16 A2	protein-coding	-2s	21.2066	18.424	18.5079	21.5163	22.696	21.0311	22.7391	21.0893	19.4386	24.0072
1277	337	O70548_SMSQEAQR_1xPhospho [S3(100)]_1xPhospho [S1(0); S3(100)]	O70548	Tcap	5	5	18.809	21.4985	20.1537	0.335508	0.155017	-6.4509	6Mo-KO_1Way down vs WT	-428.236	10.2907	-2.6895	O70548	SMSQEAQR	1xPhospho [S3(100)]	1xPhospho [S1(0); S3(100)]	NP_035670	0.0219826	0.00109972	Tcap	titin-cap	21393	Tcap	11|11 D	protein-coding	-6s	18.3535	15.9805	14.0266	22.2516	23.4328	14.0266	22.9932	22.1613	23.5017	24.8097
1236	338	Q8BWB1_TPPPTTPKTPPPVAPKPGSR_2xPhospho [T1(100); T9(100)]_2xPhospho [T1(100); T5(0); T6(0); T9(100); S19(0)]	Q8BWB1	Synpo2l	5	5	26.2644	25.7016	25.983	0.335754	1.47713	1.47713	6Mo-KO_1Way up vs WT	-1.62955	3.55556	0.5628	Q8BWB1	TPPPTTPKTPPPVAPKPGSR	2xPhospho [T1(100); T9(100)]	2xPhospho [T1(100); T5(0); T6(0); T9(100); S19(0)]	NP_001297361	2.26794e-05	0.000420153	Synpo2l	synaptopodin 2-like	68760	Synpo2l	14|14 A3	protein-coding	+1s	26.6943	24.9957	25.6392	26.6476	27.3454	26.5808	26.2637	25.7382	24.54	25.3855
1104	339	Q5F247_SLSGSGYGAVTAGK_1xPhospho [S3(99.8)]_1xPhospho [S1(0); S3(99.8); S5(0.2); Y7(0); T11(0)]	Q5F247	---	5	5	22.6425	23.1266	22.8846	0.338678	0.714963	-1.39867	6Mo-KO_1Way down vs WT	-2.9919	1.52937	-0.48406	Q5F247	SLSGSGYGAVTAGK	1xPhospho [S3(99.8)]	1xPhospho [S1(0); S3(99.8); S5(0.2); Y7(0); T11(0)]	---	0.000216923	0.000420153	Smtnl2	smoothelin-like 2	276829	Smtnl2	11|11 B4	protein-coding	-1s	22.2186	22.3259	22.2656	23.1749	23.2277	21.7949	23.3382	22.6432	23.6631	24.1936
1273	340	E0CX53_TSSTCSNESLNAGGTPVTPR_1xCarbamidomethyl [C5]; 2xPhospho [S/T]_1xCarbamidomethyl [C5]; 2xPhospho [T1(33.7); S2(33.7); S3(32.8); T4(16.6); S6(67.7); S9(15.5); T15(0); T18(0)]	E0CX53	---	5	5	22.5716	21.4257	21.9987	0.338908	2.21287	2.21287	6Mo-KO_1Way up vs WT	-2.73651	13.4001	1.14592	E0CX53	TSSTCSNESLNAGGTPVTPR	1xCarbamidomethyl [C5]; 2xPhospho [S/T]	1xCarbamidomethyl [C5]; 2xPhospho [T1(33.7); S2(33.7); S3(32.8); T4(16.6); S6(67.7); S9(15.5); T15(0); T18(0)]	---	0.00781713	0.000644898	Tbc1d4	TBC1 domain family, member 4	210789	Tbc1d4	14|14 E2.3	protein-coding	+2s	22.6212	21.9261	22.0078	22.3101	23.9929	23.1768	17.4134	22.8135	21.1232	22.6016
292	341	E9QAS5_WGQPPSPTPVPRPPDADPNTPSPKPLEGRPER_2xPhospho [S22(98.1); S/T]_2xPhospho [S6(74.1); T8(5.9); T20(21.9); S22(98.1)]	E9QAS5	---	5	5	24.8651	24.2694	24.5673	0.340399	1.51116	1.51116	6Mo-KO_1Way up vs WT	-1.69275	3.86559	0.59566	E9QAS5	WGQPPSPTPVPRPPDADPNTPSPKPLEGRPER	2xPhospho [S22(98.1); S/T]	2xPhospho [S6(74.1); T8(5.9); T20(21.9); S22(98.1)]	---	0.111467	0.00528354	Chd4	chromodomain helicase DNA binding protein 4	107932	Chd4	6 F2|6 59.28 cM	protein-coding	+1s	25.4962	24.7228	24.2066	23.7944	26.1054	23.926	24.9362	23.6893	25.5016	23.294
905	342	F6S4K9_QSVVPSQSLMTTPPASPQSFGSGSLSINSK_2xPhospho [T12(92.2); S19(89.5)]_2xPhospho [S2(1.3); S6(0.1); S8(0.1); T11(5.1); T12(92.2); S16(6.1); S19(89.5); S22(5); S24(0.3); S26(0.3); S29(0)]	F6S4K9	---	5	5	19.5767	20.1849	19.8808	0.340902	0.656042	-1.52429	6Mo-KO_1Way down vs WT	-3.98088	1.71333	-0.60814	F6S4K9	QSVVPSQSLMTTPPASPQSFGSGSLSINSK	2xPhospho [T12(92.2); S19(89.5)]	2xPhospho [S2(1.3); S6(0.1); S8(0.1); T11(5.1); T12(92.2); S16(6.1); S19(89.5); S22(5); S24(0.3); S26(0.3); S29(0)]	---	0.000692373	0.000420153	Epb41	erythrocyte membrane protein band 4.1	269587	Epb41	4 D2.3|4 64.54 cM	protein-coding	-1s	21.0926	20.258	18.9663	19.6513	17.9155	20.4289	19.9826	21.0028	19.4591	20.051
1365	343	A2ASS6_MSPARMSPAR_2xPhospho [S2(100); S7(100)]_2xPhospho [S2(100); S7(100)]	A2ASS6	---	5	5	27.7484	28.0676	27.908	0.341349	0.801514	-1.24764	6Mo-KO_1Way down vs WT	-2.06601	1.32725	-0.3192	A2ASS6	MSPARMSPAR	2xPhospho [S2(100); S7(100)]	2xPhospho [S2(100); S7(100)]	---	0.066425	0.00288454	Ttn	titin	22138	Ttn	2 C3|2 45.13 cM	protein-coding	-0.5s	28.0109	27.4379	27.3868	27.809	28.0974	28.7592	27.7797	28.3963	27.1391	28.2637
83	344	D3YUT2_AGSDGEANKAEERESPTVSPR_2xPhospho [S3(95.3); S19(99.7)]_2xPhospho [S3(95.3); S15(4.7); T17(0.4); S19(99.7)]	D3YUT2	Alpk3	5	5	20.1479	21.3758	20.7618	0.341384	0.426927	-2.34232	6Mo-KO_1Way down vs WT	-16.3063	2.97208	-1.22794	D3YUT2	AGSDGEANKAEERESPTVSPR	2xPhospho [S3(95.3); S19(99.7)]	2xPhospho [S3(95.3); S15(4.7); T17(0.4); S19(99.7)]	NP_473426	0.103736	0.00429411	Alpk3	alpha-kinase 3	116904	Alpk3	7|7 D3	protein-coding	-2s	20.8077	21.5649	21.4346	19.1325	17.7998	22.229	18.5039	22.476	19.8075	23.8628
1033	345	E9PUK6_RYSPSPPPKR_2xPhospho [S3(100); S5(100)]_2xPhospho [Y2(0); S3(100); S5(100)]	E9PUK6	Srrm1	5	5	22.6461	22.3707	22.5084	0.341571	1.21028	1.21028	6Mo-KO_1Way up vs WT	-1.27688	1.87035	0.27534	E9PUK6	RYSPSPPPKR	2xPhospho [S3(100); S5(100)]	2xPhospho [Y2(0); S3(100); S5(100)]	NP_058079	0.00282508	0.000420153	Srrm1	serine/arginine repetitive matrix 1	51796	Srrm1	4|4 D3	protein-coding	+0.5s	22.7398	22.4903	23.3904	22.1109	22.499	22.4657	22.2663	22.6982	22.6647	21.7588
613	346	Q5UAK0_INSSGKESPGSSEFFQEAVSHGK_2xPhospho [S3(81.6); S4(81.6)]_2xPhospho [S3(81.6); S4(81.6); S8(31.4); S11(2.7); S12(2.7); S20(0)]	Q5UAK0	Mier1	5	5	22.4882	21.6396	22.0639	0.343386	1.80065	1.80065	6Mo-KO_1Way up vs WT	-2.13529	6.92335	0.84852	Q5UAK0	INSSGKESPGSSEFFQEAVSHGK	2xPhospho [S3(81.6); S4(81.6)]	2xPhospho [S3(81.6); S4(81.6); S8(31.4); S11(2.7); S12(2.7); S20(0)]	NP_001034170	0.00703692	0.000644898	Mier1	MEIR1 treanscription regulator	71148	Mier1	4|4 C6	protein-coding	+2s	22.6167	22.3468	22.5137	22.521	22.4426	22.6208	22.5566	22.1708	22.5606	18.2894
855	347	A2AS44_VASPSQGQVGSSSPK_1xPhospho [S13(96.2)]_1xPhospho [S3(0); S5(0.1); S11(3); S12(0.6); S13(96.2)]	A2AS44	---	5	5	19.8727	19.4807	19.6767	0.343822	1.31219	1.31219	6Mo-KO_1Way up vs WT	-1.42054	2.44596	0.39198	A2AS44	VASPSQGQVGSSSPK	1xPhospho [S13(96.2)]	1xPhospho [S3(0); S5(0.1); S11(3); S12(0.6); S13(96.2)]	---	0.130175	0.00686468	Pkp4	plakophilin 4	227937	Pkp4	2|2 C1.1	protein-coding	+1s	19.5697	19.5512	19.3246	20.2718	20.6461	19.4046	18.9893	19.4046	20.6157	18.9893
1370	348	A2ASS6_QQSPSPIR_1xPhospho [S3(99.9)]_1xPhospho [S3(99.9); S5(0.1)]	A2ASS6	---	5	5	23.5574	22.9107	23.234	0.345051	1.56563	1.56563	6Mo-KO_1Way up vs WT	-1.78955	4.38653	0.64674	A2ASS6	QQSPSPIR	1xPhospho [S3(99.9)]	1xPhospho [S3(99.9); S5(0.1)]	---	0.0946096	0.00392242	Ttn	titin	22138	Ttn	2 C3|2 45.13 cM	protein-coding	+1s	23.2133	23.4465	23.3645	23.9858	23.7769	22.7913	23.2735	23.5192	24.3595	20.6098
913	349	Q8K2F8_SSPQLDPLRKSPTMEQAVQTASAHLPAPAPVGR_1xOxidation [M14]; 2xPhospho [S/T]_1xOxidation [M14]; 2xPhospho [S1(50); S2(50); S11(50); T13(50); T20(0); S22(0)]	Q8K2F8	Lsm14a	5	5	26.3522	25.9959	26.1741	0.348465	1.28016	1.28016	6Mo-KO_1Way up vs WT	-1.3839	2.26794	0.35632	Q8K2F8	SSPQLDPLRKSPTMEQAVQTASAHLPAPAPVGR	1xOxidation [M14]; 2xPhospho [S/T]	1xOxidation [M14]; 2xPhospho [S1(50); S2(50); S11(50); T13(50); T20(0); S22(0)]	NP_080224	0.00679449	0.000644898	Lsm14a	LSM14A mRNA processing body assembly factor	67070	Lsm14a	7|7 B1	protein-coding	+0.5s	26.0485	25.9879	26.1177	26.4897	27.1171	25.8768	26.4944	26.5083	26.1636	24.9362
830	350	A0A067XG53_TQSSSCEDLPSTTQPK_1xCarbamidomethyl [C6]; 1xPhospho [S4(76.1)]_1xCarbamidomethyl [C6]; 1xPhospho [T1(0.4); S3(11.8); S4(76.1); S5(11.8); S11(0); T12(0); T13(0)]	A0A067XG53	---	5	5	20.0457	20.7794	20.4125	0.348486	0.601343	-1.66294	6Mo-KO_1Way down vs WT	-5.3994	1.95249	-0.73374	A0A067XG53	TQSSSCEDLPSTTQPK	1xCarbamidomethyl [C6]; 1xPhospho [S4(76.1)]	1xCarbamidomethyl [C6]; 1xPhospho [T1(0.4); S3(11.8); S4(76.1); S5(11.8); S11(0); T12(0); T13(0)]	---	0.00288526	0.000420153	Cask	calcium/calmodulin-dependent serine protein kinase (MAGUK family)	12361	Cask	X A1.1|X 8.43 cM	protein-coding	-1s	18.7653	20.0699	19.9585	20.6978	20.737	20.9698	18.7622	20.5061	20.8495	22.8096
155	351	Q61235_GPAGEASASPPVR_1xPhospho [S]_1xPhospho [S7(50); S9(50)]	Q61235	Sntb2	5	5	22.2304	21.8212	22.0258	0.350192	1.32789	1.32789	6Mo-KO_1Way up vs WT	-1.45581	2.56704	0.40914	Q61235	GPAGEASASPPVR	1xPhospho [S]	1xPhospho [S7(50); S9(50)]	NP_033255	0.0296204	0.00157378	Sntb2	syntrophin, basic 2	20650	Sntb2	8 D3|8 53.38 cM	protein-coding	+1s	22.1526	22.4127	21.9789	22.6167	21.9909	21.5926	21.6199	20.5671	22.7284	22.5981
347	352	A2AUE1_SLSTSGESLYHVLGLDK_2xPhospho [S5(80.1); S8(100)]_2xPhospho [S1(2.7); S3(14.4); T4(2.7); S5(80.1); S8(100); Y10(0)]	A2AUE1	---	5	5	21.6984	21.3784	21.5384	0.352177	1.2483	1.2483	6Mo-KO_1Way up vs WT	-1.34441	2.09492	0.31996	A2AUE1	SLSTSGESLYHVLGLDK	2xPhospho [S5(80.1); S8(100)]	2xPhospho [S1(2.7); S3(14.4); T4(2.7); S5(80.1); S8(100); Y10(0)]	---	0.0151955	0.00109972	Dnajc5	DnaJ heat shock protein family (Hsp40) member C5	13002	Dnajc5	2 H4|2 103.63 cM	protein-coding	+0.5s	22.0049	21.9561	22.4607	21.3678	20.7023	21.4296	21.2395	21.6148	21.0155	21.5926
1360	353	A2ASS6_RVKSPEPVTSHPK_1xPhospho [S4(100)]_1xPhospho [S4(100); T9(0); S10(0)]	A2ASS6	---	5	5	21.0023	21.2112	21.1068	0.354566	0.865185	-1.15582	6Mo-KO_1Way down vs WT	-1.62361	1.21534	-0.20892	A2ASS6	RVKSPEPVTSHPK	1xPhospho [S4(100)]	1xPhospho [S4(100); T9(0); S10(0)]	---	0.103736	0.00429411	Ttn	titin	22138	Ttn	2 C3|2 45.13 cM	protein-coding	-0.5s	20.8103	21.3923	20.8648	21.0222	20.922	20.7468	21.1556	21.2064	21.8816	21.0658
1334	354	A2ASS6_KTPSPIEAER_1xPhospho [S4(100)]_1xPhospho [T2(0); S4(100)]	A2ASS6	---	5	5	24.7522	24.3798	24.566	0.354605	1.29458	1.29458	6Mo-KO_1Way up vs WT	-1.41589	2.37293	0.37248	A2ASS6	KTPSPIEAER	1xPhospho [S4(100)]	1xPhospho [T2(0); S4(100)]	---	0.000673166	0.000420153	Ttn	titin	22138	Ttn	2 C3|2 45.13 cM	protein-coding	+1s	24.3551	24.4905	24.405	25.2591	25.2515	23.7685	24.867	24.4616	25.2383	23.5634
1358	355	A2ASS6_TASPHFTVSK_2xPhospho [T1(100); S3(100)]_2xPhospho [T1(100); S3(100); T7(0); S9(0)]	A2ASS6	---	5	5	24.5899	24.4059	24.4979	0.35687	1.13608	1.13608	6Mo-KO_1Way up vs WT	-1.18927	1.53495	0.18406	A2ASS6	TASPHFTVSK	2xPhospho [T1(100); S3(100)]	2xPhospho [T1(100); S3(100); T7(0); S9(0)]	---	0.000199364	0.000420153	Ttn	titin	22138	Ttn	2 C3|2 45.13 cM	protein-coding	+0.5s	24.6871	24.7724	24.7472	24.1791	24.5638	24.7461	24.1256	24.5333	23.963	24.6613
732	356	P70441_SASSDTSEELNSQDSPK_1xPhospho [S3(92.3)]_1xPhospho [S1(0.1); S3(92.3); S4(7.7); T6(0); S7(0); S12(0); S15(0)]	P70441	Slc9a3r1	5	5	22.1125	21.7074	21.9099	0.3584	1.32416	1.32416	6Mo-KO_1Way up vs WT	-1.46773	2.57352	0.40508	P70441	SASSDTSEELNSQDSPK	1xPhospho [S3(92.3)]	1xPhospho [S1(0.1); S3(92.3); S4(7.7); T6(0); S7(0); S12(0); S15(0)]	NP_036160	1.51877e-05	0.000420153	Slc9a3r1	solute carrier family 9 (sodium/hydrogen exchanger), member 3 regulator 1	26941	Slc9a3r1	11|11 E2	protein-coding	+1s	21.4346	22.8358	22.6871	22.0049	21.6002	21.2797	21.6109	21.6511	22.8654	21.1301
98	357	Q3UHJ0_SATTTPSGSPR_1xPhospho [S9(90.6)]_1xPhospho [S1(0); T3(0); T4(0); T5(0); S7(9.4); S9(90.6)]	Q3UHJ0	Aak1	5	5	18.5251	19.728	19.1266	0.358957	0.434407	-2.30199	6Mo-KO_1Way down vs WT	-16.6	3.13258	-1.20288	Q3UHJ0	SATTTPSGSPR	1xPhospho [S9(90.6)]	1xPhospho [S1(0); T3(0); T4(0); T5(0); S7(9.4); S9(90.6)]	NP_001035195	0.0927535	0.00378567	Aak1	AP2 associated kinase 1	269774	Aak1	6 D1|6 37.75 cM	protein-coding	-2s	14.7724	19.1484	18.7653	19.7068	20.2327	19.5479	20.7516	16.9401	20.0038	21.3966
1401	358	Q62383_TRTPASINATPANINLADLTR_2xPhospho [T3(98.4); S6(100)]_2xPhospho [T1(1.6); T3(98.4); S6(100); T10(0); T20(0)]	Q62383	Supt6	5	5	21.5195	21.1116	21.3156	0.359087	1.32673	1.32673	6Mo-KO_1Way up vs WT	-1.47311	2.59301	0.40788	Q62383	TRTPASINATPANINLADLTR	2xPhospho [T3(98.4); S6(100)]	2xPhospho [T1(1.6); T3(98.4); S6(100); T10(0); T20(0)]	NP_033323	0.0002998	0.000420153	Supt6	SPT6, histone chaperone and transcription elongation factor	20926	Supt6	11 B5|11 46.74 cM	protein-coding	+1s	21.6899	21.3479	21.452	21.3403	21.7674	21.9177	19.6186	21.4017	21.708	20.9121
919	359	Q8K2F8_SPVPARPLPPTSQK_1xPhospho [S1(100)]_1xPhospho [S1(100); T11(0); S12(0)]	Q8K2F8	Lsm14a	5	5	23.3947	23.0564	23.2255	0.359317	1.2643	1.2643	6Mo-KO_1Way up vs WT	-1.37935	2.20484	0.33834	Q8K2F8	SPVPARPLPPTSQK	1xPhospho [S1(100)]	1xPhospho [S1(100); T11(0); S12(0)]	NP_080224	0.0052781	0.000644898	Lsm14a	LSM14A mRNA processing body assembly factor	67070	Lsm14a	7|7 B1	protein-coding	+0.5s	22.991	22.9471	22.9615	24.1604	23.9136	22.8182	23.572	22.6163	23.6302	22.6452
928	360	Q9QYG0_SRTASLTSAASIDGSR_3xPhospho [T3(98); S5(100); S11(96.1)]_3xPhospho [S1(2); T3(98); S5(100); T7(1.9); S8(2); S11(96.1); S15(0)]	Q9QYG0	Ndrg2	5	5	24.0594	23.413	23.7362	0.359571	1.56521	1.56521	6Mo-KO_1Way up vs WT	-1.84966	4.53148	0.64636	Q9QYG0	SRTASLTSAASIDGSR	3xPhospho [T3(98); S5(100); S11(96.1)]	3xPhospho [S1(2); T3(98); S5(100); T7(1.9); S8(2); S11(96.1); S15(0)]	NP_001139431	5.03315e-06	0.000420153	Ndrg2	N-myc downstream regulated gene 2	29811	Ndrg2	14|14 C2	protein-coding	+1s	24.2838	24.2795	24.5567	22.5802	24.5968	23.5676	24.1992	23.3139	21.4084	24.5761
983	361	E9QAJ9_LGEQGPEPGPTPPQTPTPPSTPPLAK_2xPhospho [T17(100); S20(84.7)]_2xPhospho [T11(0); T15(0); T17(100); S20(84.7); T21(15.3)]	E9QAJ9	Arhgap17	5	5	23.3446	23.2118	23.2782	0.359967	1.09645	1.09645	6Mo-KO_1Way up vs WT	-1.13495	1.36444	0.13284	E9QAJ9	LGEQGPEPGPTPPQTPTPPSTPPLAK	2xPhospho [T17(100); S20(84.7)]	2xPhospho [T11(0); T15(0); T17(100); S20(84.7); T21(15.3)]	NP_001116112	0.0769982	0.00360171	Arhgap17	Rho GTPase activating protein 17	70497	Arhgap17	7|7 F3	protein-coding	+0.5s	23.3208	23.1834	23.2597	23.741	23.2183	23.2157	23.3564	23.2204	23.3922	22.8743
1330	362	A2ASS6_KLSETVEETEGNSFK_1xDeamidated [N12]; 1xPhospho [S3(99.9)]_1xDeamidated [N12]; 1xPhospho [S3(99.9); T5(0.1); T9(0); S13(0)]	A2ASS6	---	5	5	21.6253	21.1339	21.3796	0.360235	1.40579	1.40579	6Mo-KO_1Way up vs WT	-1.59795	3.15794	0.49138	A2ASS6	KLSETVEETEGNSFK	1xDeamidated [N12]; 1xPhospho [S3(99.9)]	1xDeamidated [N12]; 1xPhospho [S3(99.9); T5(0.1); T9(0); S13(0)]	---	0.00042317	0.000420153	Ttn	titin	22138	Ttn	2 C3|2 45.13 cM	protein-coding	+1s	20.6571	21.6002	21.5649	21.2181	23.0863	20.6387	21.1097	21.0076	22.298	20.6157
370	363	E9Q2I4_SFEPPPYTPPPILSPVR_2xPhospho [T8(100); S14(100)]_2xPhospho [S1(0); Y7(0); T8(100); S14(100)]	E9Q2I4	Mideas	5	5	21.3732	22.0287	21.7009	0.362508	0.634855	-1.57516	6Mo-KO_1Way down vs WT	-4.6618	1.8789	-0.6555	E9Q2I4	SFEPPPYTPPPILSPVR	2xPhospho [T8(100); S14(100)]	2xPhospho [S1(0); Y7(0); T8(100); S14(100)]	NP_001156973	0.00201617	0.000420153	Mideas	mitotic deacetylase associated SANT domain protein	238317	Mideas	12|12 D1	protein-coding	-1s	22.4954	21.6666	21.8094	21.2838	19.6106	21.8279	23.1368	22.0215	22.7811	20.376
234	364	O54724_LPAKLSVSK_1xPhospho [S6(99.1)]_1xPhospho [S6(99.1); S8(0.9)]	O54724	Cavin1	5	5	22.67	22.3156	22.4928	0.362621	1.27847	1.27847	6Mo-KO_1Way up vs WT	-1.40656	2.29901	0.35442	O54724	LPAKLSVSK	1xPhospho [S6(99.1)]	1xPhospho [S6(99.1); S8(0.9)]	NP_033012	0.0720088	0.00329599	Cavin1	caveolae associated 1	19285	Cavin1	11 D|11 63.95 cM	protein-coding	+0.5s	22.2918	22.676	22.5843	23.2722	22.5256	21.4893	22.6831	22.1179	23.3818	21.9057
834	365	Q8VDD9_KVLSDSEEEEKDADVPGTSTR_2xPhospho [S4(100); S6(100)]_2xPhospho [S4(100); S6(100); T18(0); S19(0); T20(0)]	Q8VDD9	---	5	5	19.4727	18.7924	19.1325	0.364441	1.60243	1.60243	6Mo-KO_1Way up vs WT	-1.93345	4.96466	0.68026	Q8VDD9	KVLSDSEEEEKDADVPGTSTR	2xPhospho [S4(100); S6(100)]	2xPhospho [S4(100); S6(100); T18(0); S19(0); T20(0)]	---	0.0642218	0.00288454	Phip	pleckstrin homology domain interacting protein	83946	Phip	9|9 E2	protein-coding	+1s	20.2524	18.185	20.2772	19.561	19.0879	17.6839	19.1581	17.7965	18.4219	20.9018
1072	366	Q9D0B0_GSPHYFSPFRPY_1xPhospho [S2(100)]_1xPhospho [S2(100); Y5(0); S7(0); Y12(0)]	Q9D0B0	Srsf9	5	5	20.3444	19.8106	20.0775	0.365448	1.44776	1.44776	6Mo-KO_1Way up vs WT	-1.68092	3.52322	0.53382	Q9D0B0	GSPHYFSPFRPY	1xPhospho [S2(100)]	1xPhospho [S2(100); Y5(0); S7(0); Y12(0)]	NP_079849	0.0387663	0.00237867	Srsf9	serine and arginine-rich splicing factor 9	108014	Srsf9	5|5 F	protein-coding	+1s	19.6752	20.0753	19.5261	21.3479	21.0976	19.4877	20.4657	18.6368	20.9937	19.4691
360	367	Q62511_SSPSNRPPDGPGHQPAAAKPPSPAQGK_2xPhospho [S4(97.5); S22(100)]_2xPhospho [S1(1.3); S2(1.3); S4(97.5); S22(100)]	Q62511	Zfp91	5	5	22.2312	21.917	22.0741	0.365497	1.24334	1.24334	6Mo-KO_1Way up vs WT	-1.35765	2.09878	0.31422	Q62511	SSPSNRPPDGPGHQPAAAKPPSPAQGK	2xPhospho [S4(97.5); S22(100)]	2xPhospho [S1(1.3); S2(1.3); S4(97.5); S22(100)]	NP_443735	0.0420984	0.00237867	Zfp91	zinc finger protein 91	109910	Zfp91	19 A|19 8.73 cM	protein-coding	+0.5s	22.6019	21.4488	21.9827	22.2394	22.8831	21.9715	22.0559	21.3078	22.5883	21.6613
1313	368	P39447_VQIPVSHPDPEPVSDNEDDSYDEEVHDPR_2xPhospho [S6(100); S14(99.8)]_2xPhospho [S6(100); S14(99.8); S20(0.3); Y21(0)]	P39447	Tjp1	5	5	22.4772	23.4306	22.9539	0.365618	0.516407	-1.93646	6Mo-KO_1Way down vs WT	-9.48659	2.52985	-0.95342	P39447	VQIPVSHPDPEPVSDNEDDSYDEEVHDPR	2xPhospho [S6(100); S14(99.8)]	2xPhospho [S6(100); S14(99.8); S20(0.3); Y21(0)]	NP_033412	0.029826	0.00157378	Tjp1	tight junction protein 1	21872	Tjp1	7 C|7 35.02 cM	protein-coding	-2s	21.3678	23.4111	23.002	20.5343	24.0708	23.4345	24.37	21.0817	22.776	25.4909
62	369	E9Q616_GHYEVTGSDDEAGK_1xPhospho [S8(98.4)]_1xPhospho [Y3(0); T6(1.6); S8(98.4)]	E9Q616	Ahnak	5	5	21.9588	21.3527	21.6558	0.366268	1.52212	1.52212	6Mo-KO_1Way up vs WT	-1.80664	4.1857	0.60608	E9Q616	GHYEVTGSDDEAGK	1xPhospho [S8(98.4)]	1xPhospho [Y3(0); T6(1.6); S8(98.4)]	NP_033773	0.00651453	0.000644898	Ahnak	AHNAK nucleoprotein (desmoyokin)	66395	Ahnak	19|19 A	protein-coding	+1s	20.2772	21.8593	21.6121	22.5887	23.4565	20.3121	22.365	21.1727	21.811	21.1026
776	370	Q9WU42_LEPVSPPSPPHADPELELAPSR_2xPhospho [S5(100); S8(100)]_2xPhospho [S5(100); S8(100); S21(0)]	Q9WU42	Ncor2	5	5	21.595	21.9373	21.7661	0.366277	0.788772	-1.26779	6Mo-KO_1Way down vs WT	-2.24484	1.39665	-0.34232	Q9WU42	LEPVSPPSPPHADPELELAPSR	2xPhospho [S5(100); S8(100)]	2xPhospho [S5(100); S8(100); S21(0)]	NP_001240833	0.00341517	0.000420153	Ncor2	nuclear receptor co-repressor 2	20602	Ncor2	5|5 G1.1	protein-coding	-0.5s	21.3923	21.8977	21.5854	21.7812	21.3182	21.733	23.2057	21.5151	21.2445	21.9881
225	371	Q02248_SPQMVSAIVR_1xOxidation [M4]; 1xPhospho [S1(100)]_1xOxidation [M4]; 1xPhospho [S1(100); S6(0)]	Q02248	Ctnnb1	5	5	21.8834	21.5649	21.7242	0.366553	1.24702	1.24702	6Mo-KO_1Way up vs WT	-1.36497	2.1226	0.31848	Q02248	SPQMVSAIVR	1xOxidation [M4]; 1xPhospho [S1(100)]	1xOxidation [M4]; 1xPhospho [S1(100); S6(0)]	NP_001159374	0.107187	0.00429411	Ctnnb1	catenin (cadherin associated protein), beta 1	12387	Ctnnb1	9 F4|9 72.19 cM	protein-coding	+0.5s	21.7303	21.6772	21.2066	22.5372	22.2656	21.2648	21.7487	20.8871	22.2925	21.6314
1274	372	E0CX53_TSSTCSNESLNAGGTPVTPR_1xCarbamidomethyl [C5]; 1xPhospho [S/T]_1xCarbamidomethyl [C5]; 1xPhospho [T1(8.1); S2(44.9); S3(44.9); T4(0.3); S6(0.3); S9(1.6); T15(0); T18(0)]	E0CX53	---	5	5	20.8024	21.6455	21.2239	0.366891	0.557429	-1.79395	6Mo-KO_1Way down vs WT	-7.34179	2.28129	-0.84314	E0CX53	TSSTCSNESLNAGGTPVTPR	1xCarbamidomethyl [C5]; 1xPhospho [S/T]	1xCarbamidomethyl [C5]; 1xPhospho [T1(8.1); S2(44.9); S3(44.9); T4(0.3); S6(0.3); S9(1.6); T15(0); T18(0)]	---	0.00781713	0.000644898	Tbc1d4	TBC1 domain family, member 4	210789	Tbc1d4	14|14 E2.3	protein-coding	-2s	20.9884	20.6692	20.4053	21.5355	20.4134	22.1354	22.5209	18.5524	21.3737	23.6451
1391	373	A2ASS6_SRSPTPPSIAAK_2xPhospho [S3(99.9); T5(99.9)]_2xPhospho [S1(0.1); S3(99.9); T5(99.9); S8(0)]	A2ASS6	---	5	5	27.3314	27.6316	27.4815	0.366909	0.812117	-1.23135	6Mo-KO_1Way down vs WT	-2.03385	1.34139	-0.30024	A2ASS6	SRSPTPPSIAAK	2xPhospho [S3(99.9); T5(99.9)]	2xPhospho [S1(0.1); S3(99.9); T5(99.9); S8(0)]	---	0.00421617	0.000644898	Ttn	titin	22138	Ttn	2 C3|2 45.13 cM	protein-coding	-0.5s	27.1547	27.553	27.7155	27.1547	27.0791	28.1012	27.0822	27.5571	26.9643	28.4534
1230	374	Q8BWB1_AGGAESGPEEDALSLGAEACNFMQPLGGR_1xCarbamidomethyl [C20]; 1xOxidation [M23]; 2xPhospho [S6(100); S14(100)]_1xCarbamidomethyl [C20]; 1xOxidation [M23]; 2xPhospho [S6(100); S14(100)]	Q8BWB1	Synpo2l	5	5	21.9482	21.2592	21.6037	0.367004	1.6121	1.6121	6Mo-KO_1Way up vs WT	-1.96245	5.10013	0.68894	Q8BWB1	AGGAESGPEEDALSLGAEACNFMQPLGGR	1xCarbamidomethyl [C20]; 1xOxidation [M23]; 2xPhospho [S6(100); S14(100)]	1xCarbamidomethyl [C20]; 1xOxidation [M23]; 2xPhospho [S6(100); S14(100)]	NP_001297361	0.0600224	0.00288454	Synpo2l	synaptopodin 2-like	68760	Synpo2l	14|14 A3	protein-coding	+1s	22.4253	20.901	22.0778	21.0619	23.2749	22.365	19.4162	22.3205	20.5061	21.6884
682	375	Q9QVP4_QAQRGSSNVFSMFEQAQIQEFK_2xPhospho [S6(100); S7(100)]_2xPhospho [S6(100); S7(100); S11(0)]	Q9QVP4	Myl7	5	5	27.5514	27.8737	27.7126	0.367024	0.799794	-1.25032	6Mo-KO_1Way down vs WT	-2.14305	1.37084	-0.3223	Q9QVP4	QAQRGSSNVFSMFEQAQIQEFK	2xPhospho [S6(100); S7(100)]	2xPhospho [S6(100); S7(100); S11(0)]	NP_075017	0.0198046	0.00109972	Myl7	myosin, light polypeptide 7, regulatory	17898	Myl7	11 A1|11 3.88 cM	protein-coding	-0.5s	28.2595	27.5803	27.6458	27.1356	27.1356	28.4534	28.0164	27.965	26.8668	28.0667
681	376	Q9QVP4_QAQRGSSNVFSMFEQAQIQEFK_1xDeamidated [Q/N]; 2xPhospho [S6(99.4); S7(84.6)]_1xDeamidated [Q1; Q3; N8; Q15; Q17; Q19]; 2xPhospho [S6(99.4); S7(84.6); S11(16)]	Q9QVP4	Myl7	5	5	22.254	21.1379	21.6959	0.36845	2.1676	2.1676	6Mo-KO_1Way up vs WT	-2.99864	14.0891	1.1161	Q9QVP4	QAQRGSSNVFSMFEQAQIQEFK	1xDeamidated [Q/N]; 2xPhospho [S6(99.4); S7(84.6)]	1xDeamidated [Q1; Q3; N8; Q15; Q17; Q19]; 2xPhospho [S6(99.4); S7(84.6); S11(16)]	NP_075017	0.0198046	0.00109972	Myl7	myosin, light polypeptide 7, regulatory	17898	Myl7	11 A1|11 3.88 cM	protein-coding	+2s	20.4192	22.1033	23.1385	21.4971	24.1118	21.7795	23.3274	22.9121	19.2042	18.4662
861	377	P56400_SIQEFSLTAPLVAESAR_1xPhospho [S1(100)]_1xPhospho [S1(100); S6(0); T8(0); S15(0)]	P56400	Gp1bb	5	5	20.7173	19.7958	20.2566	0.369321	1.89416	1.89416	6Mo-KO_1Way up vs WT	-2.4836	8.91079	0.92156	P56400	SIQEFSLTAPLVAESAR	1xPhospho [S1(100)]	1xPhospho [S1(100); S6(0); T8(0); S15(0)]	NP_034457	0.00185308	0.000420153	Gp1bb	glycoprotein Ib, beta polypeptide	14724	Gp1bb	16 A3|16 11.53 cM	protein-coding	+2s	20.8677	20.4338	20.2123	21.0926	20.9802	18.0816	22.1651	17.7436	21.9881	19.0004
1229	378	Q8BWB1_TPPPVAPKPGSR_1xPhospho [T1(100)]_1xPhospho [T1(100); S11(0)]	Q8BWB1	Synpo2l	5	5	20.7937	20.3712	20.5825	0.370387	1.34023	1.34023	6Mo-KO_1Way up vs WT	-1.52001	2.73026	0.42248	Q8BWB1	TPPPVAPKPGSR	1xPhospho [T1(100)]	1xPhospho [T1(100); S11(0)]	NP_001297361	0.0790838	0.00360171	Synpo2l	synaptopodin 2-like	68760	Synpo2l	14|14 A3	protein-coding	+1s	20.9374	19.4904	20.1462	21.7561	21.6382	20.5533	20.3552	20.6238	20.1802	20.1434
321	379	A0A0R4J102_SPASPSQAPYAQR_1xPhospho [S1(98.6)]_1xPhospho [S1(98.6); S4(1.4); S6(0); Y10(0)]	A0A0R4J102	Cpeb3	5	5	21.5799	21.4143	21.4971	0.370798	1.12168	1.12168	6Mo-KO_1Way up vs WT	-1.17873	1.48303	0.16566	A0A0R4J102	SPASPSQAPYAQR	1xPhospho [S1(98.6)]	1xPhospho [S1(98.6); S4(1.4); S6(0); Y10(0)]	NP_001277755	0.149722	0.00880964	Cpeb3	cytoplasmic polyadenylation element binding protein 3	208922	Cpeb3	19|19 C2	protein-coding	+0.5s	21.2001	21.3297	21.4869	21.8094	22.0736	21.6755	21.3808	21.4211	21.326	21.268
1481	380	F8WIP7_NRPGLSYHYAHSHLAEEEGEDKEDSRPPTPVSQR_2xPhospho [S25(98.3); T29(93.8)]_2xPhospho [S6(0); Y7(0); Y9(0); S12(0); S25(98.3); T29(93.8); S32(8)]	F8WIP7	---	5	5	21.4416	21.9813	21.7114	0.372941	0.687895	-1.45371	6Mo-KO_1Way down vs WT	-3.62661	1.71611	-0.53974	F8WIP7	NRPGLSYHYAHSHLAEEEGEDKEDSRPPTPVSQR	2xPhospho [S25(98.3); T29(93.8)]	2xPhospho [S6(0); Y7(0); Y9(0); S12(0); S25(98.3); T29(93.8); S32(8)]	---	0.121276	0.00595432	Dpf2	D4, zinc and double PHD fingers family 2	19708	Dpf2	19 A|19 4.34 cM	protein-coding	-1s	21.3976	22.138	20.5818	20.6692	22.4212	21.7974	20.5671	22.0656	23.2735	22.2029
593	381	A0A0R4J0I9_HSLASTDEKR_2xPhospho [S2(100); T6(89)]_2xPhospho [S2(100); S5(11); T6(89)]	A0A0R4J0I9	Lrp1	5	5	20.5902	21.106	20.8481	0.375592	0.699395	-1.42981	6Mo-KO_1Way down vs WT	-3.44293	1.68412	-0.51582	A0A0R4J0I9	HSLASTDEKR	2xPhospho [S2(100); T6(89)]	2xPhospho [S2(100); S5(11); T6(89)]	NP_032538	0.117414	0.00581091	Lrp1	low density lipoprotein receptor-related protein 1	16971	Lrp1	10|10 D3	protein-coding	-1s	21.3777	20.7876	21.3082	20.3449	19.1325	21.5447	19.9644	22.1388	21.1266	20.7555
1249	382	Q8CC35_AASPAKPSSLDLVPNLPR_2xPhospho [S3(100); S]_2xPhospho [S3(100); S8(50); S9(50)]	Q8CC35	---	5	5	21.5009	21.3095	21.4052	0.375887	1.14184	1.14184	6Mo-KO_1Way up vs WT	-1.21359	1.58228	0.19136	Q8CC35	AASPAKPSSLDLVPNLPR	2xPhospho [S3(100); S]	2xPhospho [S3(100); S8(50); S9(50)]	---	0.019127	0.00109972	Synpo	synaptopodin	104027	Synpo	18|18 D3- E1	protein-coding	+0.5s	21.6121	21.5522	21.1653	21.1761	21.9986	21.4548	20.9378	21.5061	21.6018	21.047
163	383	Q9ES83_GSSSTASLPMSSPQQR_1xPhospho [S12(88.4)]_1xPhospho [S2(0); S3(0); S4(0); T5(0); S7(0); S11(11.7); S12(88.4)]	Q9ES83	Bves	5	5	23.7298	23.3272	23.5285	0.379119	1.32187	1.32187	6Mo-KO_1Way up vs WT	-1.51009	2.63864	0.40258	Q9ES83	GSSSTASLPMSSPQQR	1xPhospho [S12(88.4)]	1xPhospho [S2(0); S3(0); S4(0); T5(0); S7(0); S11(11.7); S12(88.4)]	NP_077247	0.00669986	0.000644898	Bves	blood vessel epicardial substance	23828	Bves	10 B2|10 23.47 cM	protein-coding	+1s	23.7341	23.662	23.0776	24.2749	23.9003	22.6016	23.9931	22.9093	24.4948	22.6372
559	384	Q3UHZ5_SRPPSPVAPPPPPPPPPLPPHMLPPPPPPPAPPLPEKK_1xOxidation [M22]; 2xPhospho [S1(100); S5(100)]_1xOxidation [M22]; 2xPhospho [S1(100); S5(100)]	Q3UHZ5	Lmod2	5	5	23.6411	22.6451	23.1431	0.379446	1.99446	1.99446	6Mo-KO_1Way up vs WT	-2.77586	11.042	0.996	Q3UHZ5	SRPPSPVAPPPPPPPPPLPPHMLPPPPPPPAPPLPEKK	1xOxidation [M22]; 2xPhospho [S1(100); S5(100)]	1xOxidation [M22]; 2xPhospho [S1(100); S5(100)]	NP_444328	0.000673166	0.000420153	Lmod2	leiomodin 2 (cardiac)	93677	Lmod2	6|6 A3.1	protein-coding	+2s	24.4544	24.0426	21.7605	22.2918	25.6562	20.1434	24.1788	24.2201	21.502	23.1812
1043	385	E9PUK6_HRPSSPATPPPK_2xPhospho [S4(92.9); T8(100)]_2xPhospho [S4(92.9); S5(7.1); T8(100)]	E9PUK6	Srrm1	5	5	26.3394	26.6495	26.4945	0.379513	0.806541	-1.23986	6Mo-KO_1Way down vs WT	-2.11284	1.37442	-0.31018	E9PUK6	HRPSSPATPPPK	2xPhospho [S4(92.9); T8(100)]	2xPhospho [S4(92.9); S5(7.1); T8(100)]	NP_058079	0.000774841	0.000420153	Srrm1	serine/arginine repetitive matrix 1	51796	Srrm1	4|4 D3	protein-coding	-0.5s	27.041	26.2501	26.5975	26.0826	25.7256	26.6777	26.7245	27.1824	26.9324	25.7307
563	386	Q3UHZ5_YESIDEDELLASLSPEELK_1xPhospho [S3(100)]_1xPhospho [Y1(0); S3(100); S12(0); S14(0)]	Q3UHZ5	Lmod2	5	5	19.616	18.834	19.225	0.379841	1.71947	1.71947	6Mo-KO_1Way up vs WT	-2.23162	6.59791	0.78196	Q3UHZ5	YESIDEDELLASLSPEELK	1xPhospho [S3(100)]	1xPhospho [Y1(0); S3(100); S12(0); S14(0)]	NP_444328	0.0466558	0.00237867	Lmod2	leiomodin 2 (cardiac)	93677	Lmod2	6|6 A3.1	protein-coding	+2s	19.9421	19.0032	19.306	18.6394	21.1893	18.3748	19.3787	18.8454	20.9807	16.5906
734	387	P70670_GAPVPSTGAPPSPK_1xPhospho [S12(99.8)]_1xPhospho [S6(0); T7(0.2); S12(99.8)]	P70670	Naca	5	5	21.6482	21.2161	21.4322	0.380245	1.34925	1.34925	6Mo-KO_1Way up vs WT	-1.5594	2.83886	0.43216	P70670	GAPVPSTGAPPSPK	1xPhospho [S12(99.8)]	1xPhospho [S6(0); T7(0.2); S12(99.8)]	NP_001106670	0.0114896	0.000644898	Naca	nascent polypeptide-associated complex alpha polypeptide	17938	Naca	10|10 D3	protein-coding	+1s	20.525	22.2516	21.5454	22.502	21.4171	20.9753	21.8279	20.7555	22.0559	20.4657
222	388	Q65CL1_TPEELEDVSDLEDDHEVRSHTSIQTEGK_3xPhospho [S9(100); S19(98); S22(92.6)]_3xPhospho [T1(0); S9(100); S19(98); T21(8.7); S22(92.6); T25(0.6)]	Q65CL1	Ctnna3	5	5	24.0066	22.8379	23.4222	0.38044	2.24815	2.24815	6Mo-KO_1Way up vs WT	-3.32822	16.8214	1.16874	Q65CL1	TPEELEDVSDLEDDHEVRSHTSIQTEGK	3xPhospho [S9(100); S19(98); S22(92.6)]	3xPhospho [T1(0); S9(100); S19(98); T21(8.7); S22(92.6); T25(0.6)]	NP_001157848	0.000187134	0.000420153	Ctnna3	catenin (cadherin associated protein), alpha 3	216033	Ctnna3	10|10 B4- B5.1	protein-coding	+2s	23.3165	24.1996	24.4631	22.6905	25.3633	24.1718	20.2686	23.5888	20.051	26.1091
768	389	B1AUB9_SPGSGSQSSGWHEVEPGLPSPSTLK_2xPhospho [S1(76.1); S20(87.8)]_2xPhospho [S1(76.1); S4(19.6); S6(1.5); S8(1.5); S9(1.5); S20(87.8); S22(6.1); T23(6.1)]	B1AUB9	---	5	5	20.6959	21.4459	21.0709	0.380818	0.594595	-1.68182	6Mo-KO_1Way down vs WT	-6.12557	2.16566	-0.75002	B1AUB9	SPGSGSQSSGWHEVEPGLPSPSTLK	2xPhospho [S1(76.1); S20(87.8)]	2xPhospho [S1(76.1); S4(19.6); S6(1.5); S8(1.5); S9(1.5); S20(87.8); S22(6.1); T23(6.1)]	---	0.0150898	0.00109972	Nfia	nuclear factor I/A	18027	Nfia	4 C5- C6|4 45.52 cM	protein-coding	-1s	19.2806	21.8408	21.0072	20.5297	20.821	19.0004	21.8614	21.4512	21.6148	23.3016
392	390	Q91W61_SVALAGCGQLSR_1xCarbamidomethyl [C7]; 1xDeamidated [Q9]; 1xPhospho [S1(100)]_1xCarbamidomethyl [C7]; 1xDeamidated [Q9]; 1xPhospho [S1(100); S11(0)]	Q91W61	Fbxl15	5	5	20.1442	20.584	20.3641	0.382958	0.737278	-1.35634	6Mo-KO_1Way down vs WT	-2.90432	1.57873	-0.43972	Q91W61	SVALAGCGQLSR	1xCarbamidomethyl [C7]; 1xDeamidated [Q9]; 1xPhospho [S1(100)]	1xCarbamidomethyl [C7]; 1xDeamidated [Q9]; 1xPhospho [S1(100); S11(0)]	NP_598455	0.0780345	0.00360171	Fbxl15	F-box and leucine-rich repeat protein 15	68431	Fbxl15	19|19 C3	protein-coding	-1s	20.4792	20.2029	20.6571	20.1178	19.2642	19.817	20.7555	19.817	20.4744	22.0559
881	391	E9Q3W4_GYYSPYSVSGSGSTAGSR_1xPhospho [S/T/Y]_1xPhospho [Y2(0); Y3(0); S4(0.4); Y6(0); S7(10.5); S9(10.5); S11(1.9); S13(10.5); T14(1.9); S17(64.3)]	E9Q3W4	Plec	5	5	22.0885	21.7488	21.9186	0.383199	1.26548	1.26548	6Mo-KO_1Way up vs WT	-1.4234	2.27947	0.33968	E9Q3W4	GYYSPYSVSGSGSTAGSR	1xPhospho [S/T/Y]	1xPhospho [Y2(0); Y3(0); S4(0.4); Y6(0); S7(10.5); S9(10.5); S11(1.9); S13(10.5); T14(1.9); S17(64.3)]	NP_001157675	0.0037417	0.000420153	Plec	plectin	18810	Plec	15 D3|15 35.48 cM	protein-coding	+0.5s	21.4613	21.4971	21.8408	22.9526	22.6905	21.665	21.7123	21.7761	22.4214	21.1691
513	392	E9Q1P8_IPITPTSSFVSPPPPTASPHSNR_2xPhospho [S21(94.9); S/T]_2xPhospho [T4(3.6); T6(15.9); S7(3.6); S8(3.6); S11(73.3); T16(0.3); S18(4.8); S21(94.9)]	E9Q1P8	Irf2bp2	5	5	20.2454	20.921	20.5832	0.383346	0.626054	-1.59731	6Mo-KO_1Way down vs WT	-5.15128	2.01901	-0.67564	E9Q1P8	IPITPTSSFVSPPPPTASPHSNR	2xPhospho [S21(94.9); S/T]	2xPhospho [T4(3.6); T6(15.9); S7(3.6); S8(3.6); S11(73.3); T16(0.3); S18(4.8); S21(94.9)]	NP_001158070	0.037455	0.00237867	Irf2bp2	interferon regulatory factor 2 binding protein 2	270110	Irf2bp2	8|8 E2	protein-coding	-1s	20.3182	20.4402	20.8141	20.2029	19.4515	19.9236	22.5371	21.7536	21.6755	18.7153
1074	393	H7BX95_VDGPRSPSYGR_2xPhospho [S6(100); S8(100)]_2xPhospho [S6(100); S8(100); Y9(0)]	H7BX95	---	5	5	21.816	22.9202	22.3681	0.383464	0.465167	-2.14977	6Mo-KO_1Way down vs WT	-14.5774	3.15427	-1.10418	H7BX95	VDGPRSPSYGR	2xPhospho [S6(100); S8(100)]	2xPhospho [S6(100); S8(100); Y9(0)]	---	0.137006	0.00761134	Srsf1	serine and arginine-rich splicing factor 1	110809	Srsf1	11 C|11 52.4 cM	protein-coding	-2s	22.6527	23.5545	23.7284	21.3976	17.7468	22.8743	23.3446	23.4585	21.1061	23.8174
1347	394	A2ASS6_SVDDSEVGTGVTIGAQK_1xPhospho [S1(98.8)]_1xPhospho [S1(98.8); S5(1.2); T9(0); T12(0)]	A2ASS6	---	5	5	20.2907	19.7665	20.0286	0.38568	1.43818	1.43818	6Mo-KO_1Way up vs WT	-1.73302	3.58449	0.52424	A2ASS6	SVDDSEVGTGVTIGAQK	1xPhospho [S1(98.8)]	1xPhospho [S1(98.8); S5(1.2); T9(0); T12(0)]	---	0.00198802	0.000420153	Ttn	titin	22138	Ttn	2 C3|2 45.13 cM	protein-coding	+1s	18.9481	20.934	20.5008	21.0153	20.0555	19.6488	18.7862	19.6917	21.3578	19.348
514	395	E9Q1P8_RNSSSPPSPSSMNQR_2xPhospho [S3(99.9); S4(96.7)]_2xPhospho [S3(99.9); S4(96.7); S5(3.4); S8(0); S10(0); S11(0)]	E9Q1P8	Irf2bp2	5	5	21.9971	21.7028	21.8499	0.388662	1.22626	1.22626	6Mo-KO_1Way up vs WT	-1.3662	2.05436	0.29426	E9Q1P8	RNSSSPPSPSSMNQR	2xPhospho [S3(99.9); S4(96.7)]	2xPhospho [S3(99.9); S4(96.7); S5(3.4); S8(0); S10(0); S11(0)]	NP_001158070	0.114405	0.00543843	Irf2bp2	interferon regulatory factor 2 binding protein 2	270110	Irf2bp2	8|8 E2	protein-coding	+0.5s	22.2137	21.7303	22.2557	21.452	22.3337	22.3896	21.1387	22.3421	21.3177	21.326
736	396	P70670_ADSPPAVIR_1xPhospho [S3(100)]_1xPhospho [S3(100)]	P70670	Naca	5	5	25.7364	25.4448	25.5906	0.389137	1.22401	1.22401	6Mo-KO_1Way up vs WT	-1.36312	2.04223	0.29162	P70670	ADSPPAVIR	1xPhospho [S3(100)]	1xPhospho [S3(100)]	NP_001106670	0.0265139	0.00132202	Naca	nascent polypeptide-associated complex alpha polypeptide	17938	Naca	10|10 D3	protein-coding	+0.5s	25.3521	25.7425	25.3633	26.1985	26.0255	25.127	25.9281	25.0025	26.2535	24.9127
400	397	Q61554_GGPEPPASSEMDDNSLSPEACYECK_2xCarbamidomethyl [C21; C24]; 1xDeamidated [N14]; 1xOxidation [M11]; 1xPhospho [S15(96.8)]_2xCarbamidomethyl [C21; C24]; 1xDeamidated [N14]; 1xOxidation [M11]; 1xPhospho [S8(0.4); S9(0.4); S15(96.8); S17(2.4); Y22(0)]	Q61554	Fbn1	5	5	24.5615	23.1594	23.8605	0.390465	2.64286	2.64286	6Mo-KO_1Way up vs WT	-4.46661	31.1979	1.4021	Q61554	GGPEPPASSEMDDNSLSPEACYECK	2xCarbamidomethyl [C21; C24]; 1xDeamidated [N14]; 1xOxidation [M11]; 1xPhospho [S15(96.8)]	2xCarbamidomethyl [C21; C24]; 1xDeamidated [N14]; 1xOxidation [M11]; 1xPhospho [S8(0.4); S9(0.4); S15(96.8); S17(2.4); Y22(0)]	NP_032019	0.000347522	0.000420153	Fbn1	fibrillin 1	14118	Fbn1	2 F1|2 61.38 cM	protein-coding	+2s	25.3319	26.237	26.2722	25.476	19.4904	24.9454	20.6534	23.1277	21.9435	25.127
1065	398	Q8BTI8_IHTTALTGQSPPLASGHQGEGDAPSVEPGATNIQQPSSPAPSTK_1xDeamidated [Q/N]; 2xPhospho [S37(96.3); S38(89.9)]_1xDeamidated [Q9; Q18; N32; Q34; Q35]; 2xPhospho [T3(0); T4(0); T7(0); S10(0); S15(0); S25(2.6); T31(0.9); S37(96.3); S38(89.9); S42(7.9); T43(2.5)]	Q8BTI8	Srrm2	5	5	23.8209	22.843	23.3319	0.392338	1.96968	1.96968	6Mo-KO_1Way up vs WT	-2.86065	11.0983	0.97796	Q8BTI8	IHTTALTGQSPPLASGHQGEGDAPSVEPGATNIQQPSSPAPSTK	1xDeamidated [Q/N]; 2xPhospho [S37(96.3); S38(89.9)]	1xDeamidated [Q9; Q18; N32; Q34; Q35]; 2xPhospho [T3(0); T4(0); T7(0); S10(0); S15(0); S25(2.6); T31(0.9); S37(96.3); S38(89.9); S42(7.9); T43(2.5)]	NP_780438	0.0453958	0.00237867	Srrm2	serine/arginine repetitive matrix 2	75956	Srrm2	17|17 A3.3	protein-coding	+2s	24.33	22.867	23.2133	24.534	24.1604	18.7393	24.09	23.8912	23.9799	23.5145
914	399	Q8K2F8_SSPQLDPLRKSPTMEQAVQTASAHLPAPAPVGR_1xDeamidated [Q]; 2xPhospho [S1(100); S2(100)]_1xDeamidated [Q4; Q16; Q19]; 2xPhospho [S1(100); S2(100); S11(0.1); T13(0); T20(0); S22(0)]	Q8K2F8	Lsm14a	5	5	22.2091	21.2607	21.7349	0.392355	1.92981	1.92981	6Mo-KO_1Way up vs WT	-2.77156	10.3217	0.94846	Q8K2F8	SSPQLDPLRKSPTMEQAVQTASAHLPAPAPVGR	1xDeamidated [Q]; 2xPhospho [S1(100); S2(100)]	1xDeamidated [Q4; Q16; Q19]; 2xPhospho [S1(100); S2(100); S11(0.1); T13(0); T20(0); S22(0)]	NP_080224	0.00679449	0.000644898	Lsm14a	LSM14A mRNA processing body assembly factor	67070	Lsm14a	7|7 B1	protein-coding	+2s	23.2229	22.4656	22.1009	19.1928	24.0634	19.3034	22.8486	20.3213	22.2878	21.5422
1367	400	A2ASS6_SLSRSPIR_2xPhospho [S3(100); S5(100)]_2xPhospho [S1(0); S3(100); S5(100)]	A2ASS6	---	5	5	27.7274	27.5157	27.6215	0.395411	1.1581	1.1581	6Mo-KO_1Way up vs WT	-1.25878	1.68828	0.21176	A2ASS6	SLSRSPIR	2xPhospho [S3(100); S5(100)]	2xPhospho [S1(0); S3(100); S5(100)]	---	0.127692	0.00631624	Ttn	titin	22138	Ttn	2 C3|2 45.13 cM	protein-coding	+0.5s	27.9596	27.8408	27.809	27.6241	27.4037	27.965	26.9938	27.8129	26.9938	27.8129
1090	401	E9Q740_AVSSPPTSPRPGSAATISSSASNIVPPR_2xPhospho [S4(96.3); T/S]_2xPhospho [S3(3.7); S4(96.3); T7(0); S8(0); S13(2.5); T16(68.5); S18(13); S19(13); S20(2.5); S22(0.5)]	E9Q740	---	5	5	26.7821	26.6123	26.6972	0.397598	1.12496	1.12496	6Mo-KO_1Way up vs WT	-1.20454	1.52441	0.16988	E9Q740	AVSSPPTSPRPGSAATISSSASNIVPPR	2xPhospho [S4(96.3); T/S]	2xPhospho [S3(3.7); S4(96.3); T7(0); S8(0); S13(2.5); T16(68.5); S18(13); S19(13); S20(2.5); S22(0.5)]	---	6.51475e-05	0.000420153	Srp72	signal recognition particle 72	66661	Srp72	5|5 C3.3	protein-coding	+0.5s	26.5747	26.5747	26.5326	26.9272	27.3015	26.6541	27.0493	26.4476	26.3703	26.54
550	402	Z4YJT3_SLPTTVPESPNYR_2xPhospho [S1(100); S9(98.4)]_2xPhospho [S1(100); T4(0.2); T5(1.4); S9(98.4); Y12(0)]	Z4YJT3	---	5	5	22.3623	22.0197	22.191	0.397734	1.26802	1.26802	6Mo-KO_1Way up vs WT	-1.45568	2.34057	0.34258	Z4YJT3	SLPTTVPESPNYR	2xPhospho [S1(100); S9(98.4)]	2xPhospho [S1(100); T4(0.2); T5(1.4); S9(98.4); Y12(0)]	---	0.00100513	0.000420153	Larp1	La ribonucleoprotein domain family, member 1	73158	Larp1	11|11 B1.3	protein-coding	+0.5s	22.4426	21.8094	22.7468	22.3783	22.4343	22.6755	22.2363	22.7284	20.8782	21.5801
1403	403	Q5HZG4_EPLSSINPQKTPPVLSPVR_2xPhospho [T11(100); S16(100)]_2xPhospho [S4(0); S5(0); T11(100); S16(100)]	Q5HZG4	Taf3	5	5	20.9713	21.1321	21.0517	0.398071	0.894517	-1.11792	6Mo-KO_1Way down vs WT	-1.49096	1.19301	-0.16082	Q5HZG4	EPLSSINPQKTPPVLSPVR	2xPhospho [T11(100); S16(100)]	2xPhospho [S4(0); S5(0); T11(100); S16(100)]	NP_082024	0.112927	0.00543843	Taf3	TATA-box binding protein associated factor 3	209361	Taf3	2|2 A1	protein-coding	-0.5s	21.1843	20.9299	20.6692	21.3224	20.7505	21.4055	21.4386	20.8816	21.1301	20.8046
711	404	Q8VDD5_GTGDCSDEEVDGKADGADAK_1xCarbamidomethyl [C5]; 1xPhospho [S6(99.3)]_1xCarbamidomethyl [C5]; 1xPhospho [T2(0.7); S6(99.3)]	Q8VDD5	Myh9	5	5	21.4444	20.9518	21.1981	0.400102	1.407	1.407	6Mo-KO_1Way up vs WT	-1.72387	3.41264	0.49262	Q8VDD5	GTGDCSDEEVDGKADGADAK	1xCarbamidomethyl [C5]; 1xPhospho [S6(99.3)]	1xCarbamidomethyl [C5]; 1xPhospho [T2(0.7); S6(99.3)]	NP_071855	0.0903315	0.00360171	Myh9	myosin, heavy polypeptide 9, non-muscle	17886	Myh9	15 E1|15 36.81 cM	protein-coding	+1s	20.6139	22.1269	21.7713	20.0064	22.7036	21.1026	20.6736	20.9847	20.2494	21.7487
617	405	B1AST8_SLIVTSSTSPTLPRPHSPLHGHTGNSPLDSPR_2xPhospho [S26(95.7); S/T]_2xPhospho [S1(0); T5(0.4); S6(4.9); S7(4.9); T8(17.9); S9(66.9); T11(4.9); S17(0.1); T23(2.1); S26(95.7); S30(2.1)]	B1AST8	---	5	5	23.4947	23.1661	23.3304	0.401537	1.25579	1.25579	6Mo-KO_1Way up vs WT	-1.44072	2.27204	0.3286	B1AST8	SLIVTSSTSPTLPRPHSPLHGHTGNSPLDSPR	2xPhospho [S26(95.7); S/T]	2xPhospho [S1(0); T5(0.4); S6(4.9); S7(4.9); T8(17.9); S9(66.9); T11(4.9); S17(0.1); T23(2.1); S26(95.7); S30(2.1)]	---	0.00478412	0.000644898	Mast2	microtubule associated serine/threonine kinase 2	17776	Mast2	4|4 D1	protein-coding	+0.5s	23.9213	22.8783	22.9013	23.3431	24.4297	23.0671	23.9687	22.964	23.1606	22.6703
1220	406	Q8BWB1_TPPPMAPKTPPPTTPK_2xPhospho [T1(100); T9(100)]_2xPhospho [T1(100); T9(100); T13(0); T14(0)]	Q8BWB1	Synpo2l	5	5	27.8868	27.5756	27.7312	0.403749	1.24074	1.24074	6Mo-KO_1Way up vs WT	-1.41705	2.18146	0.3112	Q8BWB1	TPPPMAPKTPPPTTPK	2xPhospho [T1(100); T9(100)]	2xPhospho [T1(100); T9(100); T13(0); T14(0)]	NP_001297361	1.92914e-05	0.000420153	Synpo2l	synaptopodin 2-like	68760	Synpo2l	14|14 A3	protein-coding	+0.5s	27.8684	27.3694	27.4379	28.0634	28.6948	27.6486	28.1908	27.0822	28.0667	26.8896
638	407	Q9CWE0_ASSFADMMGILK_1xPhospho [S3(99.1)]_1xPhospho [S2(0.9); S3(99.1)]	Q9CWE0	Mtfr1l	5	5	20.1278	20.4628	20.2953	0.404014	0.792751	-1.26143	6Mo-KO_1Way down vs WT	-2.31672	1.45595	-0.33506	Q9CWE0	ASSFADMMGILK	1xPhospho [S3(99.1)]	1xPhospho [S2(0.9); S3(99.1)]	NP_001243041	0.0202224	0.00109972	Mtfr1l	mitochondrial fission regulator 1-like	76824	Mtfr1l	4|4 D3	protein-coding	-0.5s	20.1594	19.5815	19.7598	20.8487	20.2894	19.6351	20.7037	20.3121	21.4928	20.1704
892	408	F6R8S6_TEARSSDEENGPPSSPDLDR_2xPhospho [S5(81.8); S15(82.5)]_2xPhospho [T1(0.9); S5(81.8); S6(17.3); S14(17.5); S15(82.5)]	F6R8S6	---	5	5	20.339	20.9529	20.6459	0.404389	0.653428	-1.53039	6Mo-KO_1Way down vs WT	-4.66584	1.99217	-0.6139	F6R8S6	TEARSSDEENGPPSSPDLDR	2xPhospho [S5(81.8); S15(82.5)]	2xPhospho [T1(0.9); S5(81.8); S6(17.3); S14(17.5); S15(82.5)]	---	0.124447	0.00595432	Akt1s1	AKT1 substrate 1 (proline-rich)	67605	Akt1s1	7|7 B3	protein-coding	-1s	20.3062	20.8524	20.5571	17.9585	22.0207	21.0388	21.5447	20.6833	20.2977	21.1999
623	409	P14873_ASLSPMDEPVPDSESPVEK_2xPhospho [S4(83.4); S15(96)]_2xPhospho [S2(16.6); S4(83.4); S13(4); S15(96)]	P14873	Map1b	5	5	20.8282	20.4182	20.6232	0.404879	1.32874	1.32874	6Mo-KO_1Way up vs WT	-1.58595	2.80008	0.41006	P14873	ASLSPMDEPVPDSESPVEK	2xPhospho [S4(83.4); S15(96)]	2xPhospho [S2(16.6); S4(83.4); S13(4); S15(96)]	NP_032660	0.0089302	0.000644898	Map1b	microtubule-associated protein 1B	17755	Map1b	13 D1|13 52.9 cM	protein-coding	+1s	20.7116	20.6315	20.895	20.4635	21.4396	20.9807	20.4289	20.3698	18.8655	21.446
1317	410	A2ASS6_SPSPVSSER_1xPhospho [S]_1xPhospho [S1(50); S3(50); S6(0); S7(0)]	A2ASS6	---	5	5	25.2623	24.7244	24.9933	0.405754	1.45184	1.45184	6Mo-KO_1Way up vs WT	-1.83464	3.86712	0.53788	A2ASS6	SPSPVSSER	1xPhospho [S]	1xPhospho [S1(50); S3(50); S6(0); S7(0)]	---	0.00611601	0.000644898	Ttn	titin	22138	Ttn	2 C3|2 45.13 cM	protein-coding	+1s	25.1372	24.7403	24.7403	25.5249	26.1688	24.2953	25.6422	25.0894	25.8039	22.7913
1312	411	P39447_KVQIPVSHPDPEPVSDNEDDSYDEEVHDPR_2xPhospho [S7(84.3); S15(84.3)]_2xPhospho [S7(84.3); S15(84.3); S21(24.7); Y22(6.7)]	P39447	Tjp1	5	5	21.4243	22.0794	21.7519	0.406335	0.635014	-1.57477	6Mo-KO_1Way down vs WT	-5.20129	2.09738	-0.65514	P39447	KVQIPVSHPDPEPVSDNEDDSYDEEVHDPR	2xPhospho [S7(84.3); S15(84.3)]	2xPhospho [S7(84.3); S15(84.3); S21(24.7); Y22(6.7)]	NP_033412	0.152577	0.00912834	Tjp1	tight junction protein 1	21872	Tjp1	7 C|7 35.02 cM	protein-coding	-1s	21.0679	21.7875	22.2872	20.336	21.6427	21.834	23.1977	20.1372	21.3325	23.8956
704	412	Q02566; Q91Z83; P13542_HADSVAELGEQIDNLQR_1xPhospho [S4(100)]_1xPhospho [S4(100)]	Q02566; Q91Z83; P13542	---	5	5	21.4167	21.0765	21.2466	0.40655	1.26595	1.26595	6Mo-KO_1Way up vs WT	-1.46953	2.35512	0.34022	Q02566; Q91Z83; P13542	HADSVAELGEQIDNLQR	1xPhospho [S4(100)]	1xPhospho [S4(100)]	---	0.00689045	0.000644898	Myh6	myosin, heavy polypeptide 6, cardiac muscle, alpha	17888	Myh6	14 C3|14 28.01 cM	protein-coding	+0.5s	20.8256	21.4938	21.0657	22.1703	21.5282	20.2298	21.0845	21.1026	22.1573	20.8083
782	413	A0A087WRY3_DDSHSAEDSEDEKDDHKNVR_2xPhospho [S5(96.8); S9(99.4)]_2xPhospho [S3(3.9); S5(96.8); S9(99.4)]	A0A087WRY3	Nucks1	5	5	21.4781	22.2204	21.8493	0.407183	0.597786	-1.67284	6Mo-KO_1Way down vs WT	-6.49375	2.32053	-0.7423	A0A087WRY3	DDSHSAEDSEDEKDDHKNVR	2xPhospho [S5(96.8); S9(99.4)]	2xPhospho [S3(3.9); S5(96.8); S9(99.4)]	NP_001139276	0.00048709	0.000420153	Nucks1	nuclear casein kinase and cyclin-dependent kinase substrate 1	98415	Nucks1	1|1 E4	protein-coding	-1s	20.8362	21.8728	21.799	19.4714	23.4111	21.9973	23.477	23.1768	20.376	22.0749
1385	414	A2ASS6_SHPRPAEEYEDDAERRSPTPER_2xPhospho [S17(100); T19(100)]_2xPhospho [S1(0); Y9(0); S17(100); T19(100)]	A2ASS6	---	5	5	31.1152	30.7611	30.9382	0.407757	1.27824	1.27824	6Mo-KO_1Way up vs WT	-1.4955	2.44349	0.35416	A2ASS6	SHPRPAEEYEDDAERRSPTPER	2xPhospho [S17(100); T19(100)]	2xPhospho [S1(0); Y9(0); S17(100); T19(100)]	---	0.0885539	0.00360171	Ttn	titin	22138	Ttn	2 C3|2 45.13 cM	protein-coding	+0.5s	31.1052	31.3027	31.4966	31.1052	30.5665	31.3054	29.8479	31.3054	29.8479	31.4988
930	415	Q99MR9_RGSGSSEDMYLDTPTSASR_1xPhospho [S3(78.5)]_1xPhospho [S3(78.5); S5(10.8); S6(10.8); Y10(0); T13(0); T15(0); S16(0); S18(0)]	Q99MR9	Ppp1r3a	5	5	23.2439	23.0352	23.1395	0.407832	1.15565	1.15565	6Mo-KO_1Way up vs WT	-1.26773	1.69307	0.2087	Q99MR9	RGSGSSEDMYLDTPTSASR	1xPhospho [S3(78.5)]	1xPhospho [S3(78.5); S5(10.8); S6(10.8); Y10(0); T13(0); T15(0); S16(0); S18(0)]	NP_536712	0.0222903	0.00109972	Ppp1r3a	protein phosphatase 1, regulatory subunit 3A	140491	Ppp1r3a	6|6 A1	protein-coding	+0.5s	22.8499	23.3777	23.1662	23.5403	23.2853	22.9035	23.1277	23.2297	23.5888	22.3262
279	416	Q9DCC5_RKSLSDSESDDSK_2xPhospho [S3(100); S5(99.4)]_2xPhospho [S3(100); S5(99.4); S7(0.6); S9(0); S12(0)]	Q9DCC5	Cbx3	5	5	19.1452	20.227	19.6861	0.409833	0.472419	-2.11676	6Mo-KO_1Way down vs WT	-15.4617	3.45074	-1.08186	Q9DCC5	RKSLSDSESDDSK	2xPhospho [S3(100); S5(99.4)]	2xPhospho [S3(100); S5(99.4); S7(0.6); S9(0); S12(0)]	NP_031650	0.00770832	0.000644898	Cbx3	chromobox 3	12417	Cbx3	6 B3|6 24.89 cM	protein-coding	-2s	18.424	18.2584	18.9299	19.8678	20.2458	16.9401	21.7281	22.871	21.7281	17.8679
621	417	A0A0G2JFH2_EIASPPCVEKLSDDGNVAHK_1xCarbamidomethyl [C7]; 2xPhospho [S4(100); S12(100)]_1xCarbamidomethyl [C7]; 2xPhospho [S4(100); S12(100)]	A0A0G2JFH2	---	5	5	21.6485	22.0772	21.8629	0.411052	0.742962	-1.34596	6Mo-KO_1Way down vs WT	-2.96568	1.63703	-0.42864	A0A0G2JFH2	EIASPPCVEKLSDDGNVAHK	1xCarbamidomethyl [C7]; 2xPhospho [S4(100); S12(100)]	1xCarbamidomethyl [C7]; 2xPhospho [S4(100); S12(100)]	---	0.00624608	0.000644898	Map4	microtubule-associated protein 4	17758	Map4	9 F2|9 59.83 cM	protein-coding	-1s	22.1109	21.7139	22.3298	21.6088	20.4792	22.7586	20.9464	22.2195	21.5151	22.9462
1425	418	P58771_SIDDLEDELYAQK_1xPhospho [S1(100)]_1xPhospho [S1(100); Y10(0)]	P58771	Tpm1	5	5	22.1457	21.9057	22.0257	0.41111	1.18098	1.18098	6Mo-KO_1Way up vs WT	-1.31786	1.83802	0.23998	P58771	SIDDLEDELYAQK	1xPhospho [S1(100)]	1xPhospho [S1(100); Y10(0)]	NP_001157720	0.00104111	0.000420153	Tpm1	tropomyosin 1, alpha	22003	Tpm1	9 C|9 36.27 cM	protein-coding	+0.5s	21.8029	22.3735	22.0975	22.7497	21.7049	21.446	21.6369	22.0089	22.6128	21.824
40	419	E9Q4K0_GSESGRSTPSLSVHSDSRPPSSTYQQAPR_2xPhospho [S2(96); S/T/Y]_2xPhospho [S2(96); S4(12.8); S7(45.1); T8(45.1); S10(0.5); S12(0.5); S15(0.1); S17(0); S21(0); S22(0); T23(0); Y24(0)]	E9Q4K0	Ablim2	5	5	25.0066	24.723	24.8648	0.411924	1.21719	1.21719	6Mo-KO_1Way up vs WT	-1.38691	2.0548	0.28356	E9Q4K0	GSESGRSTPSLSVHSDSRPPSSTYQQAPR	2xPhospho [S2(96); S/T/Y]	2xPhospho [S2(96); S4(12.8); S7(45.1); T8(45.1); S10(0.5); S12(0.5); S15(0.1); S17(0); S21(0); S22(0); T23(0); Y24(0)]	NP_001171167	0.0915351	0.00378567	Ablim2	actin-binding LIM protein 2	231148	Ablim2	5|5 B3	protein-coding	+0.5s	24.6556	25.3919	24.1939	25.558	25.2335	24.8468	25.2383	25.0136	24.0831	24.4333
921	420	Q62433_SRTASGSSVTSLEGTR_2xPhospho [T3(98.8); S5(100)]_2xPhospho [S1(1.2); T3(98.8); S5(100); S7(0); S8(0); T10(0); S11(0); T15(0)]	Q62433	Ndrg1	5	5	23.3546	23.1826	23.2686	0.412128	1.12667	1.12667	6Mo-KO_1Way up vs WT	-1.21971	1.54827	0.17206	Q62433	SRTASGSSVTSLEGTR	2xPhospho [T3(98.8); S5(100)]	2xPhospho [S1(1.2); T3(98.8); S5(100); S7(0); S8(0); T10(0); S11(0); T15(0)]	NP_032707	7.93305e-05	0.000420153	Ndrg1	N-myc downstream regulated gene 1	17988	Ndrg1	15|15 D2	protein-coding	+0.5s	23.5219	23.3037	23.4465	23.6227	22.8783	23.6009	23.1812	23.0613	23.3662	22.7032
1193	421	A0A087WSE3_RLQESPSLSALSETQPPSPARPSVPK_2xPhospho [S7(85.3); S/T]_2xPhospho [S5(14.6); S7(85.3); S9(0.1); S12(0); T14(0); S18(50); S23(50)]	A0A087WSE3	---	5	5	22.8929	23.2283	23.0606	0.41374	0.792564	-1.26173	6Mo-KO_1Way down vs WT	-2.34987	1.47609	-0.3354	A0A087WSE3	RLQESPSLSALSETQPPSPARPSVPK	2xPhospho [S7(85.3); S/T]	2xPhospho [S5(14.6); S7(85.3); S9(0.1); S12(0); T14(0); S18(50); S23(50)]	---	0.0107884	0.000644898	Speg	SPEG complex locus	11790	Speg	1 C4|1 38.88 cM	protein-coding	-0.5s	22.7435	23.1878	22.1757	22.8358	23.5219	22.6831	24.3769	22.8798	23.4433	22.7586
1131	422	D3Z5J3; Q62417; E9Q6A3_GTPSSSPVSPQESPK_2xPhospho [S9(99.9); S/T]_2xPhospho [T2(0.2); S4(46.4); S5(46.4); S6(7.1); S9(99.9); S13(0)]	D3Z5J3; Q62417; E9Q6A3	---	5	5	22.8187	22.2015	22.5101	0.415775	1.53394	1.53394	6Mo-KO_1Way up vs WT	-2.0582	4.84288	0.61724	D3Z5J3; Q62417; E9Q6A3	GTPSSSPVSPQESPK	2xPhospho [S9(99.9); S/T]	2xPhospho [T2(0.2); S4(46.4); S5(46.4); S6(7.1); S9(99.9); S13(0)]	---	0.00274678	0.000420153	Sorbs1	sorbin and SH3 domain containing 1	20411	Sorbs1	19 C3|19 34.25 cM	protein-coding	+1s	22.5054	23.1582	23.2693	21.5074	23.6532	23.1323	21.0028	22.9602	20.4535	23.4585
786	423	A0A286YDA2_AAKESEEEEEEEETEEK_1xPhospho [S5(100)]_1xPhospho [S5(100); T14(0)]	A0A286YDA2	Nolc1	5	5	19.6811	18.7937	19.2374	0.416252	1.84992	1.84992	6Mo-KO_1Way up vs WT	-2.8281	9.67831	0.88746	A0A286YDA2	AAKESEEEEEEEETEEK	1xPhospho [S5(100)]	1xPhospho [S5(100); T14(0)]	NP_001034440	0.0479495	0.00237867	Nolc1	nucleolar and coiled-body phosphoprotein 1	70769	Nolc1	19|19 C3	protein-coding	+2s	18.9917	19.7415	20.0064	18.5395	21.1266	15.3352	20.5431	18.9267	20.3486	18.8148
990	424	Q9ES28_MSGFIYQGK_1xPhospho [S2(100)]_1xPhospho [S2(100); Y6(0)]	Q9ES28	Arhgef7	5	5	24.6682	24.3653	24.5167	0.416466	1.23359	1.23359	6Mo-KO_1Way up vs WT	-1.42626	2.17039	0.30286	Q9ES28	MSGFIYQGK	1xPhospho [S2(100)]	1xPhospho [S2(100); Y6(0)]	NP_001106989	0.00142863	0.000420153	Arhgef7	Rho guanine nucleotide exchange factor (GEF7)	54126	Arhgef7	8|8 A1.1	protein-coding	+0.5s	24.1309	24.3485	24.2749	25.1007	25.4858	23.8861	24.9622	24.1718	24.8887	23.9177
315	425	Q69ZA1_HSSISPSTLTLK_2xPhospho [S3(99.2); S5(95.8)]_2xPhospho [S2(0.8); S3(99.2); S5(95.8); S7(3.4); T8(0.7); T10(0)]	Q69ZA1	Cdk13	5	5	20.0444	20.3225	20.1835	0.418908	0.824688	-1.21258	6Mo-KO_1Way down vs WT	-2.04286	1.38937	-0.27808	Q69ZA1	HSSISPSTLTLK	2xPhospho [S3(99.2); S5(95.8)]	2xPhospho [S2(0.8); S3(99.2); S5(95.8); S7(3.4); T8(0.7); T10(0)]	NP_001074527	0.0724936	0.00329599	Cdk13	cyclin-dependent kinase 13	69562	Cdk13	13|13 A2	protein-coding	-0.5s	20.3246	19.5039	20.2951	20.1401	19.9585	21.0187	19.5664	20.208	19.8643	20.9552
1116	426	P14142_PSGFQQIGSDDGEPPR_1xPhospho [S9(100)]_1xPhospho [S2(0); S9(100)]	P14142	Slc2a4	5	5	22.4318	22.1368	22.2843	0.419047	1.22688	1.22688	6Mo-KO_1Way up vs WT	-1.4177	2.13398	0.295	P14142	PSGFQQIGSDDGEPPR	1xPhospho [S9(100)]	1xPhospho [S2(0); S9(100)]	NP_033230	0.000354933	0.000420153	Slc2a4	solute carrier family 2 (facilitated glucose transporter), member 4	20528	Slc2a4	11 B3|11 42.93 cM	protein-coding	+0.5s	22.037	22.725	22.4549	23.0863	21.8557	21.6408	21.7183	21.8766	23.0535	22.3947
730	427	Q9JJW5_VDGSNLEGGSQQGPSTPPNTPDPRSPPNPENIAPGYSGPLK_3xPhospho [S25(82.7); S/T/Y]_3xPhospho [S4(30.5); S10(65.2); S15(50.9); T16(51.5); T20(19.1); S25(82.7); Y36(0); S37(0)]	Q9JJW5	Myoz2	5	5	23.9511	25.1283	24.5397	0.419255	0.442209	-2.26137	6Mo-KO_1Way down vs WT	-20.6104	4.03034	-1.1772	Q9JJW5	VDGSNLEGGSQQGPSTPPNTPDPRSPPNPENIAPGYSGPLK	3xPhospho [S25(82.7); S/T/Y]	3xPhospho [S4(30.5); S10(65.2); S15(50.9); T16(51.5); T20(19.1); S25(82.7); Y36(0); S37(0)]	NP_067478	0.00642379	0.000644898	Myoz2	myozenin 2	59006	Myoz2	3|3 G1	protein-coding	-2s	25.6317	26.0711	24.9755	23.0517	20.0255	26.2023	22.3739	26.1386	24.1116	26.8151
716	428	E9Q9T8_DASPDDQGSYAVIAGSSK_1xPhospho [S3(100)]_1xPhospho [S3(100); S9(0); Y10(0); S16(0); S17(0)]	E9Q9T8	---	5	5	22.6441	22.3748	22.5095	0.419515	1.20522	1.20522	6Mo-KO_1Way up vs WT	-1.37597	1.99868	0.2693	E9Q9T8	DASPDDQGSYAVIAGSSK	1xPhospho [S3(100)]	1xPhospho [S3(100); S9(0); Y10(0); S16(0); S17(0)]	---	3.04752e-05	0.000420153	Mybpc3	myosin binding protein C, cardiac	17868	Mybpc3	2|2 E1	protein-coding	+0.5s	22.2022	22.7555	22.7885	23.3733	22.1009	22.0153	21.7761	22.3739	22.856	22.8526
1227	429	Q8BWB1_GPARPSLPGAPPDEVYLSDSPAEPAPVK_2xPhospho [S6(100); S20(94.3)]_2xPhospho [S6(100); Y16(0); S18(5.7); S20(94.3)]	Q8BWB1	Synpo2l	5	5	21.1463	21.7596	21.453	0.420628	0.6537	-1.52975	6Mo-KO_1Way down vs WT	-4.85465	2.0745	-0.6133	Q8BWB1	GPARPSLPGAPPDEVYLSDSPAEPAPVK	2xPhospho [S6(100); S20(94.3)]	2xPhospho [S6(100); Y16(0); S18(5.7); S20(94.3)]	NP_001297361	0.0377138	0.00237867	Synpo2l	synaptopodin 2-like	68760	Synpo2l	14|14 A3	protein-coding	-1s	22.4025	21.1096	21.4797	21.9204	18.8192	21.8483	21.2033	22.1767	20.726	22.8436
1140	430	D3Z0N2_KESFDSQSLINNQSK_1xDeamidated [N/Q]; 2xPhospho [S3(100); S6(99.8)]_1xDeamidated [Q7; N11]; 2xPhospho [S3(100); S6(99.8); S8(0.2); S14(0)]	D3Z0N2	---	5	5	20.1393	20.6464	20.3928	0.420684	0.703665	-1.42113	6Mo-KO_1Way down vs WT	-3.69255	1.82835	-0.50704	D3Z0N2	KESFDSQSLINNQSK	1xDeamidated [N/Q]; 2xPhospho [S3(100); S6(99.8)]	1xDeamidated [Q7; N11]; 2xPhospho [S3(100); S6(99.8); S8(0.2); S14(0)]	---	3.4502e-07	0.000420153	Sorbs2	sorbin and SH3 domain containing 2	234214	Sorbs2	8|8 B1.1	protein-coding	-1s	19.8678	19.8678	19.9911	19.2231	21.7468	20.499	21.4928	20.1894	19.3921	21.6585
1240	431	Q8BWB1_SPPDSEAYYGETDSDVDGPATQEKPR_2xPhospho [S1(82.2); S14(99.9)]_2xPhospho [S1(82.2); S5(17.5); Y8(0.2); Y9(0); T12(0.1); S14(99.9); T21(0)]	Q8BWB1	Synpo2l	5	5	19.0216	19.8726	19.4471	0.421215	0.554423	-1.80368	6Mo-KO_1Way down vs WT	-8.9732	2.75823	-0.85094	Q8BWB1	SPPDSEAYYGETDSDVDGPATQEKPR	2xPhospho [S1(82.2); S14(99.9)]	2xPhospho [S1(82.2); S5(17.5); Y8(0.2); Y9(0); T12(0.1); S14(99.9); T21(0)]	NP_001297361	0.000737617	0.000420153	Synpo2l	synaptopodin 2-like	68760	Synpo2l	14|14 A3	protein-coding	-2s	20.0899	18.9091	17.5653	18.2584	20.2854	17.8679	20.9937	18.7622	19.1088	22.6302
969	432	Q9CT10_SAGSSSPEAGEDSDHEDGNYCPPVK_1xCarbamidomethyl [C21]; 2xPhospho [S13(100); S/Y]_1xCarbamidomethyl [C21]; 2xPhospho [S1(40.3); S4(40.3); S5(9.7); S6(9.7); S13(100); Y20(0)]	Q9CT10	Ranbp3	5	5	21.7531	22.1665	21.9598	0.421459	0.750873	-1.33178	6Mo-KO_1Way down vs WT	-2.90467	1.63768	-0.41336	Q9CT10	SAGSSSPEAGEDSDHEDGNYCPPVK	1xCarbamidomethyl [C21]; 2xPhospho [S13(100); S/Y]	1xCarbamidomethyl [C21]; 2xPhospho [S1(40.3); S4(40.3); S5(9.7); S6(9.7); S13(100); Y20(0)]	NP_082209	0.112927	0.00543843	Ranbp3	RAN binding protein 3	71810	Ranbp3	17|17 D	protein-coding	-1s	20.6265	21.9423	22.4573	21.7347	22.0049	21.7369	23.4706	21.5447	21.4962	22.5841
505	433	P62806_RISGLIYEETR_1xPhospho [S3(100)]_1xPhospho [S3(100); Y7(0); T10(0)]	P62806	H4c17	5	5	23.1667	22.7937	22.9802	0.421534	1.29503	1.29503	6Mo-KO_1Way up vs WT	-1.56082	2.61764	0.37298	P62806	RISGLIYEETR	1xPhospho [S3(100)]	1xPhospho [S3(100); Y7(0); T10(0)]	NP_001182350	0.000891869	0.000420153	H4c17	H4 clustered histone 17	100041230	H4c17	13 A3.1|13	protein-coding	+1s	22.6573	22.9359	22.701	23.677	23.8621	21.9137	23.5944	22.365	23.7091	22.3862
865	434	A0A0U1RPA0_SVDISLGGSPR_1xPhospho [S9(100)]_1xPhospho [S1(0); S5(0); S9(100)]	A0A0U1RPA0	---	5	5	24.4023	24.1112	24.2568	0.421562	1.22352	1.22352	6Mo-KO_1Way up vs WT	-1.41544	2.11892	0.29104	A0A0U1RPA0	SVDISLGGSPR	1xPhospho [S9(100)]	1xPhospho [S1(0); S5(0); S9(100)]	---	0.000631875	0.000420153	Plekha7	pleckstrin homology domain containing, family A member 7	233765	Plekha7	7|7 F1	protein-coding	+0.5s	23.8621	24.0831	23.9995	24.9086	25.158	23.5597	24.7379	23.7775	24.5011	23.9799
843	435	Q9Z239_TGEPDEEEGTFRSSIR_1xPhospho [S14(92.9)]_1xPhospho [T1(0); T10(0); S13(7.1); S14(92.9)]	Q9Z239	Fxyd1	5	5	25.4747	25.2205	25.3476	0.422375	1.19272	1.19272	6Mo-KO_1Way up vs WT	-1.35582	1.92878	0.25426	Q9Z239	TGEPDEEEGTFRSSIR	1xPhospho [S14(92.9)]	1xPhospho [T1(0); T10(0); S13(7.1); S14(92.9)]	NP_062376	0.00674701	0.000644898	Fxyd1	FXYD domain-containing ion transport regulator 1	56188	Fxyd1	7|7 B1	protein-coding	+0.5s	25.6392	25.1676	24.7724	25.7118	26.0826	24.8367	25.4153	24.7592	25.8273	25.2638
870	436	A0A0U1RPA0_KVMSPLQSPTK_2xPhospho [S4(100); S8(99.5)]_2xPhospho [S4(100); S8(99.5); T10(0.5)]	A0A0U1RPA0	---	5	5	25.151	25.0297	25.0904	0.422657	1.08765	1.08765	6Mo-KO_1Way up vs WT	-1.15636	1.36796	0.12122	A0A0U1RPA0	KVMSPLQSPTK	2xPhospho [S4(100); S8(99.5)]	2xPhospho [S4(100); S8(99.5); T10(0.5)]	---	1.75216e-06	0.000420153	Plekha7	pleckstrin homology domain containing, family A member 7	233765	Plekha7	7|7 F1	protein-coding	+0.5s	25.1301	25.2774	25.1993	25.1301	25.0179	25.4433	24.9715	24.9622	25.1636	24.6081
1409	437	E9QMN5_RPPSPDVIVLSDSEQPSSPR_2xPhospho [S4(100); S18(86.9)]_2xPhospho [S4(100); S11(0); S13(0.1); S17(13); S18(86.9)]	E9QMN5	Gatad2a	5	5	19.6088	19.9043	19.7566	0.422846	0.814824	-1.22726	6Mo-KO_1Way down vs WT	-2.14657	1.42519	-0.29544	E9QMN5	RPPSPDVIVLSDSEQPSSPR	2xPhospho [S4(100); S18(86.9)]	2xPhospho [S4(100); S11(0); S13(0.1); S17(13); S18(86.9)]	NP_663571	0.108596	0.00469242	Gatad2a	GATA zinc finger domain containing 2A	234366	Gatad2a	8|8 B3.3	protein-coding	-0.5s	19.9585	19.6234	19.6513	19.7885	19.0224	20.6833	19.0004	19.757	19.5587	20.5219
1015	438	E9Q8Y7_SLMASDGQLPK_1xPhospho [S5(99.9)]_1xPhospho [S1(0.1); S5(99.9)]	E9Q8Y7	Sspn	5	5	20.606	20.2875	20.4468	0.423544	1.24703	1.24703	6Mo-KO_1Way up vs WT	-1.46654	2.2806	0.3185	E9Q8Y7	SLMASDGQLPK	1xPhospho [S5(99.9)]	1xPhospho [S1(0.1); S5(99.9)]	NP_001297766	0.0150898	0.00109972	Sspn	sarcospan	16651	Sspn	6 G3|6 77.7 cM	protein-coding	+0.5s	20.0555	20.5297	20.2264	21.1798	21.0385	19.6823	20.2921	19.8492	21.4336	20.1802
298	439	E9Q6L0_RQSSGSTTNVASTPSDSR_1xPhospho [S/T]_1xPhospho [S3(66); S4(10.1); S6(1.7); T7(10.1); T8(10.1); S12(0.3); T13(1.7); S15(0.3); S17(0)]	E9Q6L0	Clasp1	5	5	20.3839	19.9707	20.1773	0.425113	1.33164	1.33164	6Mo-KO_1Way up vs WT	-1.64794	2.92221	0.4132	E9Q6L0	RQSSGSTTNVASTPSDSR	1xPhospho [S/T]	1xPhospho [S3(66); S4(10.1); S6(1.7); T7(10.1); T8(10.1); S12(0.3); T13(1.7); S15(0.3); S17(0)]	NP_001280230	0.143241	0.00826345	Clasp1	CLIP associating protein 1	76707	Clasp1	1|1 E2.3	protein-coding	+1s	20.258	19.9508	19.8448	20.9884	20.8776	19.2604	20.0604	20.6778	21.0928	18.7622
597	440	P59997_SCEEPLTPPPHSPTSMLQLIHDPVSPR_1xCarbamidomethyl [C2]; 2xPhospho [T7(75.8); S12(85.1)]_1xCarbamidomethyl [C2]; 2xPhospho [S1(25.7); T7(75.8); S12(85.1); T14(9.7); S15(3.7); S25(0.1)]	P59997	Kdm2a	5	5	19.7997	20.135	19.9673	0.42539	0.792619	-1.26164	6Mo-KO_1Way down vs WT	-2.38828	1.50042	-0.3353	P59997	SCEEPLTPPPHSPTSMLQLIHDPVSPR	1xCarbamidomethyl [C2]; 2xPhospho [T7(75.8); S12(85.1)]	1xCarbamidomethyl [C2]; 2xPhospho [S1(25.7); T7(75.8); S12(85.1); T14(9.7); S15(3.7); S25(0.1)]	NP_001001984	0.0180902	0.00109972	Kdm2a	lysine (K)-specific demethylase 2A	225876	Kdm2a	19|19 A	protein-coding	-0.5s	20.7415	18.8676	19.4075	19.7694	20.2123	20.7096	20.0225	19.5587	20.6534	19.7306
202	441	P61014_RASTIEMPQQAR_1xPhospho [S3(99.5)]_1xPhospho [S3(99.5); T4(0.5)]	P61014	Pln	5	5	28.436	28.168	28.302	0.426123	1.20414	1.20414	6Mo-KO_1Way up vs WT	-1.38424	2.00707	0.268	P61014	RASTIEMPQQAR	1xPhospho [S3(99.5)]	1xPhospho [S3(99.5); T4(0.5)]	NP_001135399	0.00102657	0.000420153	Pln	phospholamban	18821	Pln	10|10 B3	protein-coding	+0.5s	27.809	28.4489	28.1394	29.1413	28.6412	27.408	28.5049	28.2637	28.6982	27.965
1127	442	D3Z5J3; E9Q6A3_STQDLSDVSTDEVGIPLR_1xPhospho [S/T]_1xPhospho [S1(49.6); T2(49.6); S6(0.9); S9(0); T10(0)]	D3Z5J3; E9Q6A3	---	5	5	20.0684	20.7404	20.4044	0.426603	0.627627	-1.5933	6Mo-KO_1Way down vs WT	-5.74499	2.26305	-0.67202	D3Z5J3; E9Q6A3	STQDLSDVSTDEVGIPLR	1xPhospho [S/T]	1xPhospho [S1(49.6); T2(49.6); S6(0.9); S9(0); T10(0)]	---	0.0015544	0.000420153	Sorbs1	sorbin and SH3 domain containing 1	20411	Sorbs1	19 C3|19 34.25 cM	protein-coding	-1s	18.2921	21.937	20.4876	19.8448	19.7803	19.146	21.1301	21.7018	19.796	21.928
460	443	Q9Z1E4_YPRPASVPPSPSLSR_2xPhospho [S6(100); S10(100)]_2xPhospho [Y1(0); S6(100); S10(100); S12(0); S14(0)]	Q9Z1E4	Gys1	5	5	25.9147	25.35	25.6323	0.426824	1.4791	1.4791	6Mo-KO_1Way up vs WT	-1.98744	4.34799	0.56472	Q9Z1E4	YPRPASVPPSPSLSR	2xPhospho [S6(100); S10(100)]	2xPhospho [Y1(0); S6(100); S10(100); S12(0); S14(0)]	NP_109603	4.82513e-06	0.000420153	Gys1	glycogen synthase 1, muscle	14936	Gys1	7 B3|7 29.31 cM	protein-coding	+1s	25.8863	26.1477	24.0971	25.6668	27.7755	26.2297	24.4039	24.7796	25.5636	25.773
69	444	Q9WTQ5_EKEPTKPLESPTSPVSNETTSSFK_2xPhospho [T5(79.3); S13(90.5)]_2xPhospho [T5(79.3); S10(20.4); T12(8.2); S13(90.5); S16(0.4); T19(0.4); T20(0.4); S21(0.2); S22(0.2)]	Q9WTQ5	Akap12	5	5	20.7956	21.3728	21.0842	0.427203	0.670291	-1.49189	6Mo-KO_1Way down vs WT	-4.49507	2.01959	-0.57714	Q9WTQ5	EKEPTKPLESPTSPVSNETTSSFK	2xPhospho [T5(79.3); S13(90.5)]	2xPhospho [T5(79.3); S10(20.4); T12(8.2); S13(90.5); S16(0.4); T19(0.4); T20(0.4); S21(0.2); S22(0.2)]	NP_112462	0.054954	0.00252693	Akap12	A kinase (PRKA) anchor protein (gravin) 12	83397	Akap12	10|10 A1	protein-coding	-1s	21.2181	21.5074	21.4901	21.1231	18.6394	22.6929	20.4828	21.0622	20.62	22.0059
50	445	E9Q616_HRSNSFSDER_2xPhospho [S3(100); S5(99.9)]_2xPhospho [S3(100); S5(99.9); S7(0.1)]	E9Q616	Ahnak	5	5	20.9367	22.155	21.5459	0.427966	0.429783	-2.32676	6Mo-KO_1Way down vs WT	-23.9685	4.4273	-1.21832	E9Q616	HRSNSFSDER	2xPhospho [S3(100); S5(99.9)]	2xPhospho [S3(100); S5(99.9); S7(0.1)]	NP_033773	0.00379463	0.000420153	Ahnak	AHNAK nucleoprotein (desmoyokin)	66395	Ahnak	19|19 A	protein-coding	-2s	16.8159	22.6871	22.8569	20.9174	21.4062	22.3541	22.5444	24.3386	22.9856	18.5524
759	446	Q6KCD5_AITSLLGGGSPK_1xPhospho [S10(100)]_1xPhospho [T3(0); S4(0); S10(100)]	Q6KCD5	Nipbl	5	5	19.2474	19.8936	19.5705	0.428109	0.638961	-1.56504	6Mo-KO_1Way down vs WT	-5.39435	2.20236	-0.6462	Q6KCD5	AITSLLGGGSPK	1xPhospho [S10(100)]	1xPhospho [T3(0); S4(0); S10(100)]	NP_081983	0.082862	0.00360171	Nipbl	NIPBL cohesin loading factor	71175	Nipbl	15|15 A1	protein-coding	-1s	17.1407	19.4293	19.1746	20.6726	19.82	18.4662	19.6712	19.4162	20.4218	21.4928
972	447	P97855_STSPAPADVAPAQEDLR_1xPhospho [S3(99.1)]_1xPhospho [S1(0); T2(0.9); S3(99.1)]	P97855	G3bp1	5	5	25.5209	25.1877	25.3543	0.428174	1.25984	1.25984	6Mo-KO_1Way up vs WT	-1.50267	2.38504	0.33324	P97855	STSPAPADVAPAQEDLR	1xPhospho [S3(99.1)]	1xPhospho [S1(0); T2(0.9); S3(99.1)]	NP_038744	5.2872e-06	0.000420153	G3bp1	GTPase activating protein (SH3 domain) binding protein 1	27041	G3bp1	11|11 B1.3	protein-coding	+0.5s	24.9755	25.3633	25.2676	26.1868	25.8114	24.6081	25.3579	24.9234	26.4225	24.6265
29	448	E9Q9C4_SSSDFFYPK_1xPhospho [S3(99.9)]_1xPhospho [S1(0); S2(0.1); S3(99.9); Y7(0)]	E9Q9C4	---	5	5	20.0815	19.6425	19.862	0.428544	1.35561	1.35561	6Mo-KO_1Way up vs WT	-1.71108	3.1444	0.43894	E9Q9C4	SSSDFFYPK	1xPhospho [S3(99.9)]	1xPhospho [S1(0); S2(0.1); S3(99.9); Y7(0)]	---	0.0104906	0.000644898	Ablim1	actin-binding LIM protein 1	226251	Ablim1	19 D2|19 52.09 cM	protein-coding	+1s	18.7423	19.9993	19.82	20.5461	21.2996	19.524	19.2403	19.1088	20.8614	19.4781
128	449	Q8C2Q8_THSDQFLVSFK_1xPhospho [S3(100)]_1xPhospho [T1(0); S3(100); S9(0)]	Q8C2Q8	Atp5c1	5	5	20.9998	20.6961	20.848	0.428768	1.23436	1.23436	6Mo-KO_1Way up vs WT	-1.45063	2.21024	0.30376	Q8C2Q8	THSDQFLVSFK	1xPhospho [S3(100)]	1xPhospho [T1(0); S3(100); S9(0)]	NP_001106209	0.0164079	0.00109972	Atp5c1	ATP synthase, H+ transporting, mitochondrial F1 complex, gamma polypeptide 1	11949	Atp5c1	2|2 A1	protein-coding	+0.5s	20.4977	20.8709	20.2854	21.5814	21.7638	20.1802	20.9181	20.2494	21.3548	20.7779
967	450	F6R6F1_SHSGTSPDNTAPPPPPPRPQPSHSR_2xPhospho [S3(95.7); S24(96.4)]_2xPhospho [S1(3.5); S3(95.7); T5(0.7); S6(0); T10(0); S22(3.6); S24(96.4)]	F6R6F1	---	5	5	23.3306	23.052	23.1913	0.430064	1.21307	1.21307	6Mo-KO_1Way up vs WT	-1.40893	2.07328	0.27866	F6R6F1	SHSGTSPDNTAPPPPPPRPQPSHSR	2xPhospho [S3(95.7); S24(96.4)]	2xPhospho [S1(3.5); S3(95.7); T5(0.7); S6(0); T10(0); S22(3.6); S24(96.4)]	---	0.161424	0.00980824	Reps1	RalBP1 associated Eps domain containing protein	19707	Reps1	10|10 A3	protein-coding	+0.5s	23.9136	23.2853	23.5219	23.2888	22.6435	23.3922	22.1467	23.7163	23.0886	22.916
1110	451	K3W4N7_GVDTVSRSSLEMSPLAPVTNHER_1xOxidation [M12]; 2xPhospho [T4(84.8); S/T]_1xOxidation [M12]; 2xPhospho [T4(84.8); S6(41.8); S8(36.7); S9(36.7); S13(0); T19(0)]	K3W4N7	Scn5a	5	5	21.9573	21.6318	21.7946	0.430493	1.25315	1.25315	6Mo-KO_1Way up vs WT	-1.49352	2.3454	0.32556	K3W4N7	GVDTVSRSSLEMSPLAPVTNHER	1xOxidation [M12]; 2xPhospho [T4(84.8); S/T]	1xOxidation [M12]; 2xPhospho [T4(84.8); S6(41.8); S8(36.7); S9(36.7); S13(0); T19(0)]	NP_001240789	0.00250698	0.000420153	Scn5a	sodium channel, voltage-gated, type V, alpha	20271	Scn5a	9 F3|9 71.33 cM	protein-coding	+0.5s	22.0017	21.4062	21.8885	21.2582	23.232	21.7923	21.3325	21.8573	21.0977	22.079
1202	452	A0A087WSE3_RGSSAESALPR_1xPhospho [S]_1xPhospho [S3(50); S4(50); S7(0)]	A0A087WSE3	---	5	5	23.6444	23.4028	23.5236	0.431295	1.18235	1.18235	6Mo-KO_1Way up vs WT	-1.34797	1.88441	0.24166	A0A087WSE3	RGSSAESALPR	1xPhospho [S]	1xPhospho [S3(50); S4(50); S7(0)]	---	0.000183226	0.000420153	Speg	SPEG complex locus	11790	Speg	1 C4|1 38.88 cM	protein-coding	+0.5s	23.4565	23.7341	23.192	24.1721	23.6674	23.2017	23.5888	23.194	24.2323	22.797
696	453	Q9CQ19_ATSNVFAMFDQSQIQEFK_2xDeamidated [N/Q]; 1xPhospho [T/S]_2xDeamidated [N4; Q11; Q13; Q15]; 1xPhospho [T2(49.5); S3(49.5); S12(0.9)]	Q9CQ19	Myl9	5	5	23.9698	23.4274	23.6986	0.432103	1.45639	1.45639	6Mo-KO_1Way up vs WT	-1.95838	4.15388	0.5424	Q9CQ19	ATSNVFAMFDQSQIQEFK	2xDeamidated [N/Q]; 1xPhospho [T/S]	2xDeamidated [N4; Q11; Q13; Q15]; 1xPhospho [T2(49.5); S3(49.5); S12(0.9)]	NP_742116	0.107889	0.00449347	Myl9	myosin, light polypeptide 9, regulatory	98932	Myl9	2|2 H1	protein-coding	+1s	23.4919	23.6158	23.6348	24.5567	24.5499	21.2286	24.5011	24.1566	24.279	22.9718
1287	454	A0A087WQ94_AASDGQYENQSPEATSPRSPGVR_2xPhospho [S16(76.4); S19(98.6)]_2xPhospho [S3(0.1); Y7(0.1); S11(0.5); T15(24.4); S16(76.4); S19(98.6)]	A0A087WQ94	---	5	5	21.6304	21.0917	21.361	0.432552	1.45262	1.45262	6Mo-KO_1Way up vs WT	-1.95138	4.11764	0.53866	A0A087WQ94	AASDGQYENQSPEATSPRSPGVR	2xPhospho [S16(76.4); S19(98.6)]	2xPhospho [S3(0.1); Y7(0.1); S11(0.5); T15(24.4); S16(76.4); S19(98.6)]	---	0.0542115	0.00252693	Tns1	tensin 1	21961	Tns1	1 C3|1 38.17 cM	protein-coding	+1s	23.1385	21.4832	21.0728	19.8771	22.5802	21.3137	22.1354	20.8495	20.2686	20.8913
1389	455	A2ASS6_IELSPSMEAPK_1xOxidation [M7]; 1xPhospho [S6(100)]_1xOxidation [M7]; 1xPhospho [S4(0); S6(100)]	A2ASS6	---	5	5	23.9584	23.6329	23.7956	0.433383	1.25315	1.25315	6Mo-KO_1Way up vs WT	-1.49967	2.35506	0.32556	A2ASS6	IELSPSMEAPK	1xOxidation [M7]; 1xPhospho [S6(100)]	1xOxidation [M7]; 1xPhospho [S4(0); S6(100)]	---	5.90373e-05	0.000420153	Ttn	titin	22138	Ttn	2 C3|2 45.13 cM	protein-coding	+0.5s	23.531	23.8319	23.6227	24.5862	24.2204	22.9385	23.9463	23.1899	24.8277	23.262
1413	456	P62996_RRSPSPYYSR_2xPhospho [S3(100); S5(100)]_2xPhospho [S3(100); S5(100); Y7(0); Y8(0); S9(0)]	P62996	Tra2b	5	5	27.9655	28.0588	28.0121	0.433564	0.937415	-1.06676	6Mo-KO_1Way down vs WT	-1.27812	1.12315	-0.09324	P62996	RRSPSPYYSR	2xPhospho [S3(100); S5(100)]	2xPhospho [S3(100); S5(100); Y7(0); Y8(0); S9(0)]	NP_001317483	0.00850286	0.000644898	Tra2b	transformer 2 beta	20462	Tra2b	16 B1|16 13.18 cM	protein-coding	-0.5s	28.0634	27.9596	28.221	27.7428	27.8408	28.2239	27.8129	28.1012	27.965	28.1908
558	457	Q3UHZ5_SRPPSPVAPPPPPPPPPLPPHMLPPPPPPPAPPLPEKK_2xPhospho [S1(100); S5(100)]_2xPhospho [S1(100); S5(100)]	Q3UHZ5	Lmod2	5	5	21.1469	20.2226	20.6848	0.433644	1.89771	1.89771	6Mo-KO_1Way up vs WT	-3.16305	11.3911	0.92426	Q3UHZ5	SRPPSPVAPPPPPPPPPLPPHMLPPPPPPPAPPLPEKK	2xPhospho [S1(100); S5(100)]	2xPhospho [S1(100); S5(100)]	NP_444328	0.000673166	0.000420153	Lmod2	leiomodin 2 (cardiac)	93677	Lmod2	6|6 A3.1	protein-coding	+2s	22.931	20.652	20.4725	20.9374	20.7415	17.3209	23.0204	19.2604	19.4691	22.0423
67	458	O08715_SESSGNLPSVADTR_1xPhospho [S3(88.2)]_1xPhospho [S1(1.3); S3(88.2); S4(10.4); S9(0); T13(0)]	O08715	Akap1	5	5	21.3249	21.5754	21.4502	0.434291	0.840605	-1.18962	6Mo-KO_1Way down vs WT	-1.93494	1.36726	-0.2505	O08715	SESSGNLPSVADTR	1xPhospho [S3(88.2)]	1xPhospho [S1(1.3); S3(88.2); S4(10.4); S9(0); T13(0)]	NP_001036006	0.000372846	0.000420153	Akap1	A kinase (PRKA) anchor protein 1	11640	Akap1	11|11 C	protein-coding	-0.5s	20.8604	21.2803	20.9374	21.5854	21.9609	21.3359	21.8146	20.9378	22.2735	21.5151
114	459	Q8K4L2_QIPSSPLQQPASPNHPGDSPLPTEAR_2xPhospho [S12(99.9); S/T]_2xPhospho [S4(50); S5(50); S12(99.9); S19(0); T23(0)]	Q8K4L2	---	5	5	24.0054	23.6797	23.8425	0.434864	1.25324	1.25324	6Mo-KO_1Way up vs WT	-1.50304	2.36067	0.32566	Q8K4L2	QIPSSPLQQPASPNHPGDSPLPTEAR	2xPhospho [S12(99.9); S/T]	2xPhospho [S4(50); S5(50); S12(99.9); S19(0); T23(0)]	---	0.0141706	0.00109972	Svil	supervillin	225115	Svil	18|18 A1	protein-coding	+0.5s	23.7868	24.3397	24.3007	24.1939	23.4058	24.2537	24.7026	23.1204	23.5285	22.7934
1454	460	F6ZGN3_SASAADVSSR_1xPhospho [S3(99.9)]_1xPhospho [S1(0.1); S3(99.9); S8(0); S9(0)]	F6ZGN3	---	5	5	18.8217	20.2169	19.5193	0.434977	0.380208	-2.63014	6Mo-KO_1Way down vs WT	-39.6648	5.73386	-1.39514	F6ZGN3	SASAADVSSR	1xPhospho [S3(99.9)]	1xPhospho [S1(0.1); S3(99.9); S8(0); S9(0)]	---	0.0114095	0.000644898	Myo18a	myosin XVIIIA	360013	Myo18a	11|11 B5	protein-coding	-2s	17.8704	17.9987	17.1407	19.0879	22.011	14.7707	22.6452	20.2298	20.5125	22.9262
630	461	P14873_SLMSSPEDLTKDFEELKAEEIDVAK_2xPhospho [S4(81.4); S5(78.2)]_2xPhospho [S1(33.3); S4(81.4); S5(78.2); T10(7.1)]	P14873	Map1b	5	5	19.9648	20.977	20.4709	0.435228	0.49579	-2.01698	6Mo-KO_1Way down vs WT	-14.4597	3.55429	-1.0122	P14873	SLMSSPEDLTKDFEELKAEEIDVAK	2xPhospho [S4(81.4); S5(78.2)]	2xPhospho [S1(33.3); S4(81.4); S5(78.2); T10(7.1)]	NP_032660	0.0146742	0.00109972	Map1b	microtubule-associated protein 1B	17755	Map1b	13 D1|13 52.9 cM	protein-coding	-2s	20.8524	17.6864	19.8108	20.4192	21.0552	22.6982	23.7461	20.6702	20.208	17.5625
1173	462	Q5U4C3_RRSASPPPAASSSSSSR_2xPhospho [S3(100); S5(100)]_2xPhospho [S3(100); S5(100); S11(0); S12(0); S13(0); S14(0); S15(0); S16(0)]	Q5U4C3	Scaf1	5	5	19.5132	19.9692	19.7412	0.436192	0.728984	-1.37177	6Mo-KO_1Way down vs WT	-3.33845	1.77411	-0.45604	Q5U4C3	RRSASPPPAASSSSSSR	2xPhospho [S3(100); S5(100)]	2xPhospho [S3(100); S5(100); S11(0); S12(0); S13(0); S14(0); S15(0); S16(0)]	NP_001008422	0.0326299	0.00181132	Scaf1	SR-related CTD-associated factor 1	233208	Scaf1	7|7 B3	protein-coding	-1s	19.3817	19.1746	19.2231	18.7185	21.0679	20.0038	21.326	20.0417	19.3034	19.1711
328	463	A2ALU3_RTSVSSPEHLVKPLR_2xPhospho [S6(98); T/S]_2xPhospho [T2(49.5); S3(49.5); S5(3); S6(98)]	A2ALU3	---	5	5	21.1582	21.9095	21.5339	0.437593	0.594068	-1.68331	6Mo-KO_1Way down vs WT	-7.32041	2.5835	-0.7513	A2ALU3	RTSVSSPEHLVKPLR	2xPhospho [S6(98); T/S]	2xPhospho [T2(49.5); S3(49.5); S5(3); S6(98)]	---	0.00765448	0.000644898	Dennd1a	DENN/MADD domain containing 1A	227801	Dennd1a	2|2 B	protein-coding	-1s	22.476	21.8029	21.8432	21.9827	17.6864	22.3472	22.3075	22.3862	21.4992	21.0076
608	464	A2AJI1_SSQPSPTTVPASDSPPAK_2xPhospho [S5(99.9); S/T]_2xPhospho [S1(50); S2(50); S5(99.9); T7(0.1); T8(0); S12(0); S14(0)]	A2AJI1	Map7d1	5	5	21.8648	21.3158	21.5903	0.438033	1.46307	1.46307	6Mo-KO_1Way up vs WT	-2.003	4.28757	0.549	A2AJI1	SSQPSPTTVPASDSPPAK	2xPhospho [S5(99.9); S/T]	2xPhospho [S1(50); S2(50); S5(99.9); T7(0.1); T8(0); S12(0); S14(0)]	NP_001139442	0.00184009	0.000420153	Map7d1	MAP7 domain containing 1	245877	Map7d1	4|4 D2.2	protein-coding	+1s	21.7605	21.7842	22.0017	20.5818	23.1958	22.4094	19.4046	21.3966	21.1999	22.1685
525	465	Q9ET78_TSLSSLRSEHSNGTVAPDSPAADGPMLPSPPVPR_1xDeamidated [N12]; 1xOxidation [M26]; 2xPhospho [S5(78.3); T/S]_1xDeamidated [N12]; 1xOxidation [M26]; 2xPhospho [T1(50); S2(50); S4(21.7); S5(78.3); S8(0); S11(0); T14(0); S19(0); S29(0)]	Q9ET78	Jph2	5	5	25.2713	25.5113	25.3913	0.439027	0.846745	-1.18099	6Mo-KO_1Way down vs WT	-1.89164	1.35626	-0.24	Q9ET78	TSLSSLRSEHSNGTVAPDSPAADGPMLPSPPVPR	1xDeamidated [N12]; 1xOxidation [M26]; 2xPhospho [S5(78.3); T/S]	1xDeamidated [N12]; 1xOxidation [M26]; 2xPhospho [T1(50); S2(50); S4(21.7); S5(78.3); S8(0); S11(0); T14(0); S19(0); S29(0)]	NP_001192005	0.000241063	0.000420153	Jph2	junctophilin 2	59091	Jph2	2|2 H3	protein-coding	-0.5s	25.9749	25.0711	24.8713	25.7349	24.7042	25.5761	25.7896	25.9033	25.1409	25.1465
365	466	E9QP49_GQGSEPAAITGGQVGPETPEPPPSPPETR_2xPhospho [T18(100); S24(83.1)]_2xPhospho [S4(0); T10(0); T18(100); S24(83.1); T28(16.9)]	E9QP49	Ehbp1l1	5	5	22.2036	22.4299	22.3167	0.439305	0.854848	-1.1698	6Mo-KO_1Way down vs WT	-1.82436	1.33318	-0.22626	E9QP49	GQGSEPAAITGGQVGPETPEPPPSPPETR	2xPhospho [T18(100); S24(83.1)]	2xPhospho [S4(0); T10(0); T18(100); S24(83.1); T28(16.9)]	NP_001108069	0.000314931	0.000420153	Ehbp1l1	EH domain binding protein 1-like 1	114601	Ehbp1l1	19|19 A	protein-coding	-0.5s	22.5407	22.0338	21.9749	22.6307	21.8379	23.173	21.9803	22.5566	21.9228	22.5166
348	467	A2AUE1_SLSTSGESLYHVLGLDK_1xPhospho [S3(92.7)]_1xPhospho [S1(6.7); S3(92.7); T4(0.5); S5(0); S8(0); Y10(0)]	A2AUE1	---	5	5	23.4558	23.0851	23.2705	0.440618	1.29291	1.29291	6Mo-KO_1Way up vs WT	-1.60515	2.68319	0.37062	A2AUE1	SLSTSGESLYHVLGLDK	1xPhospho [S3(92.7)]	1xPhospho [S1(6.7); S3(92.7); T4(0.5); S5(0); S8(0); Y10(0)]	---	0.0151955	0.00109972	Dnajc5	DnaJ heat shock protein family (Hsp40) member C5	13002	Dnajc5	2 H4|2 103.63 cM	protein-coding	+1s	22.9075	22.9573	22.9526	24.0708	24.3906	22.3862	23.5465	22.6054	24.1256	22.762
377	468	Q8JZQ9_AKPAAQSEEETATSPAASPTPQSAER_3xPhospho [T11(95); T13(76.1); S18(96.6)]_3xPhospho [S7(5.2); T11(95); T13(76.1); S14(26.1); S18(96.6); T20(1.1); S23(0)]	Q8JZQ9	Eif3b	5	5	20.8432	21.277	21.0601	0.441276	0.740289	-1.35082	6Mo-KO_1Way down vs WT	-3.17927	1.74232	-0.43384	Q8JZQ9	AKPAAQSEEETATSPAASPTPQSAER	3xPhospho [T11(95); T13(76.1); S18(96.6)]	3xPhospho [S7(5.2); T11(95); T13(76.1); S14(26.1); S18(96.6); T20(1.1); S23(0)]	NP_598677	5.82125e-05	0.000420153	Eif3b	eukaryotic translation initiation factor 3, subunit B	27979	Eif3b	5 G2|5 78.97 cM	protein-coding	-1s	20.9111	20.4792	20.5102	20.0638	22.2516	21.3435	22.0986	20.2832	20.5478	22.112
808	469	Q9ET54_AYGNKSPPTPTALLSPTK_2xPhospho [S6(100); T9(100)]_2xPhospho [Y2(0); S6(100); T9(100); T11(0); S15(0); T17(0)]	Q9ET54	Palld	5	5	22.8811	23.051	22.966	0.442033	0.888904	-1.12498	6Mo-KO_1Way down vs WT	-1.57388	1.2436	-0.1699	Q9ET54	AYGNKSPPTPTALLSPTK	2xPhospho [S6(100); T9(100)]	2xPhospho [Y2(0); S6(100); T9(100); T11(0); S15(0); T17(0)]	NP_001074859	7.18901e-05	0.000420153	Palld	palladin, cytoskeletal associated protein	72333	Palld	8|8 B3.1	protein-coding	-0.5s	22.6379	22.7667	23.1221	23.3956	22.4832	23.4293	22.9262	22.7353	22.8964	23.2678
902	470	A0A087WR45_SPDVDTPEQPR_1xPhospho [S1(100)]_1xPhospho [S1(100); T6(0)]	A0A087WR45	Prob1	5	5	25.2828	25.1698	25.2263	0.443774	1.08143	1.08143	6Mo-KO_1Way up vs WT	-1.15698	1.35307	0.11294	A0A087WR45	SPDVDTPEQPR	1xPhospho [S1(100)]	1xPhospho [S1(100); T6(0)]	NP_001257575	4.98659e-05	0.000420153	Prob1	proline rich basic protein 1	381148	Prob1	18|18 B2	protein-coding	+0.5s	24.9853	25.4507	25.3521	25.3036	25.3222	25.1636	25.2638	25.2555	25.4284	24.7379
827	471	P97467_GSSGLNLGNFFASR_1xPhospho [S3(99.9)]_1xPhospho [S2(0.1); S3(99.9); S13(0)]	P97467	Pam	5	5	26.7995	27.1559	26.9777	0.444028	0.78109	-1.28026	6Mo-KO_1Way down vs WT	-2.59794	1.58501	-0.35644	P97467	GSSGLNLGNFFASR	1xPhospho [S3(99.9)]	1xPhospho [S2(0.1); S3(99.9); S13(0)]	NP_038654	0.0398474	0.00237867	Pam	peptidylglycine alpha-amidating monooxygenase	18484	Pam	1 D|1 47.76 cM	protein-coding	-0.5s	26.7417	26.4443	27.041	27.3694	26.401	26.2535	28.1444	27.0493	28.0164	26.316
893	472	F6R8S6_AATATRPPGPPPAPQPPSPAPSPPPRPALAR_2xPhospho [S18(100); S22(100)]_2xPhospho [T3(0); T5(0); S18(100); S22(100)]	F6R8S6	---	5	5	24.2638	23.9695	24.1166	0.444213	1.22627	1.22627	6Mo-KO_1Way up vs WT	-1.46303	2.20003	0.29428	F6R8S6	AATATRPPGPPPAPQPPSPAPSPPPRPALAR	2xPhospho [S18(100); S22(100)]	2xPhospho [T3(0); T5(0); S18(100); S22(100)]	---	0.0506415	0.00252693	Akt1s1	AKT1 substrate 1 (proline-rich)	67605	Akt1s1	7|7 B3	protein-coding	+0.5s	24.2256	24.6464	24.8574	24.2414	23.3482	24.2478	22.9385	24.1936	24.1843	24.2834
1011	473	A0A1L1STF9_ISSKSPGHMVILNQTK_2xPhospho [S3(85.2); S5(99.5)]_2xPhospho [S2(15.4); S3(85.2); S5(99.5); T15(0)]	A0A1L1STF9	---	5	5	22.8215	22.9642	22.8928	0.444222	0.90581	-1.10398	6Mo-KO_1Way down vs WT	-1.4658	1.20267	-0.14272	A0A1L1STF9	ISSKSPGHMVILNQTK	2xPhospho [S3(85.2); S5(99.5)]	2xPhospho [S2(15.4); S3(85.2); S5(99.5); T15(0)]	---	0.0393033	0.00237867	Sltm	SAFB-like, transcription modulator	66660	Sltm	9|9 D	protein-coding	-0.5s	23.2545	22.7497	22.5984	22.5137	22.991	23.3274	22.9066	22.7913	23.109	22.6866
89	474	G3UXF4_HIHQELDKELGESEGLSDDEETISTR_1xPhospho [S17(91.5)]_1xPhospho [S13(7.4); S17(91.5); T22(0.3); S24(0.1); T25(0.8)]	G3UXF4	---	5	5	20.8179	20.3272	20.5725	0.444289	1.40518	1.40518	6Mo-KO_1Way up vs WT	-1.88652	3.72502	0.49076	G3UXF4	HIHQELDKELGESEGLSDDEETISTR	1xPhospho [S17(91.5)]	1xPhospho [S13(7.4); S17(91.5); T22(0.3); S24(0.1); T25(0.8)]	---	0.0472984	0.00237867	Ank1	ankyrin 1, erythroid	11733	Ank1	8 A2|8 11.42 cM	protein-coding	+1s	20.4254	21.3182	20.5343	19.6849	22.1269	19.348	19.7847	19.7031	21.4824	21.3177
325	475	Q8C9B9_YSVHSIDTAATSTTPPGSPPPPPPLPEPPVLK_2xPhospho [S/T/Y]_2xPhospho [Y1(3.3); S2(41.7); S5(66.9); T8(45.4); T11(11.3); S12(11.3); T13(11.3); T14(4.4); S18(4.4)]	Q8C9B9	Dido1	5	5	22.0449	22.3032	22.1741	0.445695	0.836107	-1.19602	6Mo-KO_1Way down vs WT	-2.001	1.39885	-0.25824	Q8C9B9	YSVHSIDTAATSTTPPGSPPPPPPLPEPPVLK	2xPhospho [S/T/Y]	2xPhospho [Y1(3.3); S2(41.7); S5(66.9); T8(45.4); T11(11.3); S12(11.3); T13(11.3); T14(4.4); S18(4.4)]	NP_001278361	0.011251	0.000644898	Dido1	death inducer-obliterator 1	23856	Dido1	2|2 H4	protein-coding	-0.5s	22.4513	22.2872	22.1109	22.4378	20.9374	22.839	22.4471	22.1039	22.0381	22.0877
207	476	P61014_RASTIEMPQQAR_1xDeamidated [Q]; 1xOxidation [M7]; 2xPhospho [S3(100); T4(100)]_1xDeamidated [Q9; Q10]; 1xOxidation [M7]; 2xPhospho [S3(100); T4(100)]	P61014	Pln	5	5	25.7061	25.2911	25.4986	0.446203	1.3333	1.3333	6Mo-KO_1Way up vs WT	-1.71662	3.05162	0.415	P61014	RASTIEMPQQAR	1xDeamidated [Q]; 1xOxidation [M7]; 2xPhospho [S3(100); T4(100)]	1xDeamidated [Q9; Q10]; 1xOxidation [M7]; 2xPhospho [S3(100); T4(100)]	NP_001135399	0.00102657	0.000420153	Pln	phospholamban	18821	Pln	10|10 B3	protein-coding	+1s	26.329	25.6192	26.3445	26.1477	24.0901	25.8422	24.6351	24.7461	25.1085	26.1236
486	477	P51859_GSAEGSSDEEGKLVIDEPAK_2xPhospho [S6(100); S7(100)]_2xPhospho [S2(0); S6(100); S7(100)]	P51859	Hdgf	5	5	23.3911	22.056	22.7235	0.446351	2.52307	2.52307	6Mo-KO_1Way up vs WT	-5.69392	36.2468	1.33518	P51859	GSAEGSSDEEGKLVIDEPAK	2xPhospho [S6(100); S7(100)]	2xPhospho [S2(0); S6(100); S7(100)]	NP_032257	0.000970405	0.000420153	Hdgf	heparin binding growth factor	15191	Hdgf	3 F1|3 38.78 cM	protein-coding	+2s	22.7918	23.5932	24.3397	21.826	24.405	24.0634	16.9401	23.3505	20.0225	25.9033
1073	478	Q9D0B0_GSPHYFSPFRPY_2xPhospho [S2(100); S7(100)]_2xPhospho [S2(100); Y5(0); S7(100); Y12(0)]	Q9D0B0	Srsf9	5	5	21.8157	21.5449	21.6803	0.446938	1.20644	1.20644	6Mo-KO_1Way up vs WT	-1.42398	2.07261	0.27076	Q9D0B0	GSPHYFSPFRPY	2xPhospho [S2(100); S7(100)]	2xPhospho [S2(100); Y5(0); S7(100); Y12(0)]	NP_079849	0.0387663	0.00237867	Srsf9	serine and arginine-rich splicing factor 9	108014	Srsf9	5|5 F	protein-coding	+0.5s	22.0905	21.0926	21.2882	22.037	22.5702	21.3913	22.0835	21.3913	21.8948	20.9638
1171	479	E9Q4Q2_TGDLGIPPNPEDRSPSPEPIYNSEGK_2xPhospho [S16(93.5); S23(100)]_2xPhospho [T1(0); S14(6.5); S16(93.5); Y21(0); S23(100)]	E9Q4Q2	Sf1	5	5	24.2287	25.0664	24.6475	0.447896	0.55955	-1.78715	6Mo-KO_1Way down vs WT	-9.5679	2.99568	-0.83766	E9Q4Q2	TGDLGIPPNPEDRSPSPEPIYNSEGK	2xPhospho [S16(93.5); S23(100)]	2xPhospho [T1(0); S14(6.5); S16(93.5); Y21(0); S23(100)]	NP_035880	0.0580222	0.00274627	Sf1	splicing factor 1	22668	Sf1	19|19 A	protein-coding	-2s	24.7328	25.3222	25.6317	24.5705	20.8863	26.2787	23.3872	25.2304	23.9997	26.4358
540	480	Q5UE59_SRESLNMDVVK_2xPhospho [S1(100); S4(100)]_2xPhospho [S1(100); S4(100)]	Q5UE59	Klc1	5	5	21.3436	20.954	21.1488	0.448247	1.31003	1.31003	6Mo-KO_1Way up vs WT	-1.66684	2.86059	0.3896	Q5UE59	SRESLNMDVVK	2xPhospho [S1(100); S4(100)]	2xPhospho [S1(100); S4(100)]	NP_032476	0.0200822	0.00109972	Klc1	kinesin light chain 1	16593	Klc1	12 F1|12 61.13 cM	protein-coding	+1s	21.4901	20.57	22.0301	20.5659	22.062	21.4859	20.726	21.2797	19.6586	21.6199
1225	481	Q8BWB1_TPPPMAPKTPPPTTPKTPPPVAPKPGSR_3xPhospho [T1(100); T9(100); T17(100)]_3xPhospho [T1(100); T9(100); T13(0); T14(0); T17(100); S27(0)]	Q8BWB1	Synpo2l	5	5	24.3316	23.746	24.0388	0.449231	1.50075	1.50075	6Mo-KO_1Way up vs WT	-2.16131	4.86779	0.58568	Q8BWB1	TPPPMAPKTPPPTTPKTPPPVAPKPGSR	3xPhospho [T1(100); T9(100); T17(100)]	3xPhospho [T1(100); T9(100); T13(0); T14(0); T17(100); S27(0)]	NP_001297361	0.0179646	0.00109972	Synpo2l	synaptopodin 2-like	68760	Synpo2l	14|14 A3	protein-coding	+1s	24.8912	22.7717	23.6289	24.7724	25.594	25.1726	24.0831	24.2062	21.9352	23.3327
1178	482	Q60598_KQTPPASPSPQPIEDRPPSSPIYEDAAPFK_3xPhospho [T3(99.4); S9(99.4); S/Y]_3xPhospho [T3(99.4); S7(1.3); S9(99.4); S19(50); S20(50); Y23(0)]	Q60598	Cttn	5	5	25.9951	26.1721	26.0836	0.450171	0.884589	-1.13047	6Mo-KO_1Way down vs WT	-1.61421	1.26312	-0.17692	Q60598	KQTPPASPSPQPIEDRPPSSPIYEDAAPFK	3xPhospho [T3(99.4); S9(99.4); S/Y]	3xPhospho [T3(99.4); S7(1.3); S9(99.4); S19(50); S20(50); Y23(0)]	NP_031829	0.0019741	0.000420153	Cttn	cortactin	13043	Cttn	7|7 F5	protein-coding	-0.5s	26.1985	26.2926	26.329	25.852	25.3036	26.4596	26.3503	26.0636	26.1712	25.8156
502	483	G5E8J6_HQGHSDDDDDDGVSTEHGHQAHR_1xPhospho [S14(99.6)]_1xPhospho [S5(0); S14(99.6); T15(0.4)]	G5E8J6	Hrc	5	5	18.9724	18.3274	18.6499	0.45267	1.56374	1.56374	6Mo-KO_1Way up vs WT	-2.36088	5.77301	0.645	G5E8J6	HQGHSDDDDDDGVSTEHGHQAHR	1xPhospho [S14(99.6)]	1xPhospho [S5(0); S14(99.6); T15(0.4)]	NP_034603	0.0012947	0.000420153	Hrc	histidine rich calcium binding protein	15464	Hrc	7 B3|7 29.26 cM	protein-coding	+1s	20.0753	18.8869	19.1599	19.5993	17.1407	17.7436	17.2296	20.6481	17.2296	18.7862
1242	484	Q8BWB1_RFSTPAPQPTAEPLAPTVLVPR_2xPhospho [S3(100); T4(99.7)]_2xPhospho [S3(100); T4(99.7); T10(0.3); T17(0)]	Q8BWB1	Synpo2l	5	5	23.7554	23.4711	23.6133	0.452704	1.21782	1.21782	6Mo-KO_1Way up vs WT	-1.46036	2.16584	0.2843	Q8BWB1	RFSTPAPQPTAEPLAPTVLVPR	2xPhospho [S3(100); T4(99.7)]	2xPhospho [S3(100); T4(99.7); T10(0.3); T17(0)]	NP_001297361	0.000526273	0.000420153	Synpo2l	synaptopodin 2-like	68760	Synpo2l	14|14 A3	protein-coding	+0.5s	24.378	23.5752	24.2696	23.6441	22.91	23.8174	23.0351	23.7879	23.9687	22.7463
1390	485	A2ASS6_SRSPTPPSIAAK_3xPhospho [S1(100); S3(100); T5(97.8)]_3xPhospho [S1(100); S3(100); T5(97.8); S8(2.2)]	A2ASS6	---	5	5	22.0097	23.0914	22.5506	0.45273	0.472465	-2.11656	6Mo-KO_1Way down vs WT	-18.9263	4.2248	-1.08172	A2ASS6	SRSPTPPSIAAK	3xPhospho [S1(100); S3(100); T5(97.8)]	3xPhospho [S1(100); S3(100); T5(97.8); S8(2.2)]	---	0.00421617	0.000644898	Ttn	titin	22138	Ttn	2 C3|2 45.13 cM	protein-coding	-2s	23.2693	22.4726	21.2222	21.8841	21.2001	24.6351	23.0484	23.9463	18.1328	25.6943
747	486	B7ZCI2_SHSGSTFGTGLGDDK_1xPhospho [S3(100)]_1xPhospho [S1(0); S3(100); S5(0); T6(0); T9(0)]	B7ZCI2	---	5	5	23.8528	23.5938	23.7233	0.452922	1.19663	1.19663	6Mo-KO_1Way up vs WT	-1.4123	2.02232	0.25898	B7ZCI2	SHSGSTFGTGLGDDK	1xPhospho [S3(100)]	1xPhospho [S1(0); S3(100); S5(0); T6(0); T9(0)]	---	3.37053e-06	0.000420153	Nebl	nebulette	74103	Nebl	2|2 A3	protein-coding	+0.5s	23.4373	23.9858	23.811	24.2483	23.7814	23.124	24.1566	23.2251	24.47	22.9932
936	487	A2AJW4_SLPTSPERR_2xPhospho [S1(100); T4(91.8)]_2xPhospho [S1(100); T4(91.8); S5(8.2)]	A2AJW4	Ppp1r3d	5	5	23.6108	23.1847	23.3977	0.454302	1.34354	1.34354	6Mo-KO_1Way up vs WT	-1.76943	3.19399	0.42604	A2AJW4	SLPTSPERR	2xPhospho [S1(100); T4(91.8)]	2xPhospho [S1(100); T4(91.8); S5(8.2)]	NP_001078970	0.0324053	0.00181132	Ppp1r3d	protein phosphatase 1, regulatory subunit 3D	228966	Ppp1r3d	2|2 H4	protein-coding	+1s	23.879	24.3709	22.9273	23.3645	23.5122	24.6009	21.7974	23.1479	22.5758	23.8017
1076	488	P04627_GSPSPASVSSGR_1xPhospho [S2(99.1)]_1xPhospho [S2(99.1); S4(0.8); S7(0); S9(0.1); S10(0.1)]	P04627	Araf	5	5	20.9989	20.7566	20.8777	0.454444	1.18286	1.18286	6Mo-KO_1Way up vs WT	-1.38359	1.93586	0.24228	P04627	GSPSPASVSSGR	1xPhospho [S2(99.1)]	1xPhospho [S2(99.1); S4(0.8); S7(0); S9(0.1); S10(0.1)]	NP_001153117	0.105794	0.00429411	Araf	Araf proto-oncogene, serine/threonine kinase	11836	Araf	X A1.3|X 16.3 cM	protein-coding	+0.5s	20.6461	20.7505	20.4684	21.3583	21.7713	20.2494	21.0119	21.0155	21.1512	20.3552
1315	489	A2ASS6_SPIRMSPAMSPAR_3xPhospho [S1(100); S6(100); S10(100)]_3xPhospho [S1(100); S6(100); S10(100)]	A2ASS6	---	5	5	22.2461	22.6989	22.4725	0.454548	0.730634	-1.36868	6Mo-KO_1Way down vs WT	-3.43727	1.8349	-0.45278	A2ASS6	SPIRMSPAMSPAR	3xPhospho [S1(100); S6(100); S10(100)]	3xPhospho [S1(100); S6(100); S10(100)]	---	0.00674701	0.000644898	Ttn	titin	22138	Ttn	2 C3|2 45.13 cM	protein-coding	-1s	23.2749	22.4025	22.4092	21.8357	21.3082	23.6115	22.4027	23.523	21.0187	22.9385
119	490	Q8K4L2_SISFPEVPR_1xPhospho [S3(99.9)]_1xPhospho [S1(0.1); S3(99.9)]	Q8K4L2	---	5	5	19.9571	20.5069	20.232	0.45473	0.683096	-1.46392	6Mo-KO_1Way down vs WT	-4.48087	2.09086	-0.54984	Q8K4L2	SISFPEVPR	1xPhospho [S3(99.9)]	1xPhospho [S1(0.1); S3(99.9)]	---	0.0420984	0.00237867	Svil	supervillin	225115	Svil	18|18 A1	protein-coding	-1s	19.0529	20.5511	20.0184	21.1967	18.9663	19.1291	21.824	20.1434	21.7795	19.6586
904	491	D3Z316_EADEEDSDEETSYPER_1xPhospho [S7(100)]_1xPhospho [S7(100); T11(0); S12(0); Y13(0)]	D3Z316	Mtres1	5	5	22.2904	21.6361	21.9632	0.455329	1.57387	1.57387	6Mo-KO_1Way up vs WT	-2.40986	5.96941	0.65432	D3Z316	EADEEDSDEETSYPER	1xPhospho [S7(100)]	1xPhospho [S7(100); T11(0); S12(0); Y13(0)]	NP_080687	0.000511673	0.000420153	Mtres1	mitochondrial transcription rescue factor 1	67851	Mtres1	10|10 B2	protein-coding	+1s	21.7638	22.696	23.1749	20.2772	23.5403	20.502	22.8182	21.8706	20.0296	22.9602
282	492	Q9Z0X4_ISPVPSPSSSPPQGSPASSPVSNSASQQFPESPEVTIK_2xPhospho [S2(99.7); S/T]_2xPhospho [S2(99.7); S6(11.1); S8(29.3); S9(29.3); S10(29.3); S15(0.3); S18(0.2); S19(0.2); S22(0.2); S24(0.3); S26(0.2); S32(0); T36(0)]	Q9Z0X4	Pde3a	5	5	22.5345	21.9566	22.2456	0.455442	1.4927	1.4927	6Mo-KO_1Way up vs WT	-2.17531	4.8469	0.57792	Q9Z0X4	ISPVPSPSSSPPQGSPASSPVSNSASQQFPESPEVTIK	2xPhospho [S2(99.7); S/T]	2xPhospho [S2(99.7); S6(11.1); S8(29.3); S9(29.3); S10(29.3); S15(0.3); S18(0.2); S19(0.2); S22(0.2); S24(0.3); S26(0.2); S32(0); T36(0)]	NP_061249	0.00978133	0.000644898	Pde3a	phosphodiesterase 3A, cGMP inhibited	54611	Pde3a	6|6 G2	protein-coding	+1s	23.7454	21.9986	23.8241	22.7594	20.3449	22.3421	21.6613	22.69	22.4061	20.6833
1184	493	Q9Z1W9_RVPGSSGHLHK_2xPhospho [S5(100); S6(100)]_2xPhospho [S5(100); S6(100)]	Q9Z1W9	Stk39	5	5	23.2787	22.6056	22.9422	0.455664	1.59454	1.59454	6Mo-KO_1Way up vs WT	-2.47422	6.29083	0.67314	Q9Z1W9	RVPGSSGHLHK	2xPhospho [S5(100); S6(100)]	2xPhospho [S5(100); S6(100)]	NP_058562	0.142336	0.00826345	Stk39	serine/threonine kinase 39	53416	Stk39	2|2 C1.3	protein-coding	+1s	23.3904	23.9213	23.2722	21.2882	24.5215	23.0794	24.279	22.8009	22.6606	20.208
658	494	V9GWW6_IPGSTLRSNTTSPQPQTDTFSLADVPSVTPVLSPLSSSK_2xPhospho [S/T]_2xPhospho [S4(67.1); T5(48.3); S8(27.5); T10(16.3); T11(16.3); S12(16.3); T17(3.7); T19(3.7); S21(0.5); S27(0.1); T29(0); S33(0); S36(0); S37(0); S38(0)]	V9GWW6	---	5	5	22.8205	22.2327	22.5266	0.457542	1.50302	1.50302	6Mo-KO_1Way up vs WT	-2.21743	5.0093	0.58786	V9GWW6	IPGSTLRSNTTSPQPQTDTFSLADVPSVTPVLSPLSSSK	2xPhospho [S/T]	2xPhospho [S4(67.1); T5(48.3); S8(27.5); T10(16.3); T11(16.3); S12(16.3); T17(3.7); T19(3.7); S21(0.5); S27(0.1); T29(0); S33(0); S36(0); S37(0); S38(0)]	---	0.0177159	0.00109972	Mlip	muscular LMNA-interacting protein	69642	Mlip	9|9 D	protein-coding	+1s	23.7631	22.2282	21.8297	22.5407	23.741	23.1977	21.5906	23.0886	19.996	23.2905
60	495	E9Q616_GGVTGSPEASISGSKGDLK_2xPhospho [S6(87.8); S14(99.9)]_2xPhospho [T4(12.2); S6(87.8); S10(0.1); S12(0.1); S14(99.9)]	E9Q616	Ahnak	5	5	23.0915	22.6369	22.8642	0.457874	1.37036	1.37036	6Mo-KO_1Way up vs WT	-1.85241	3.47863	0.45456	E9Q616	GGVTGSPEASISGSKGDLK	2xPhospho [S6(87.8); S14(99.9)]	2xPhospho [T4(12.2); S6(87.8); S10(0.1); S12(0.1); S14(99.9)]	NP_033773	0.125251	0.00631624	Ahnak	AHNAK nucleoprotein (desmoyokin)	66395	Ahnak	19|19 A	protein-coding	+1s	23.9743	22.7978	22.9573	22.7626	22.9653	23.2057	20.6334	23.4538	22.4027	23.4889
1386	496	A2ASS6_IELSPSMEAPK_1xPhospho [S6(100)]_1xPhospho [S4(0); S6(100)]	A2ASS6	---	5	5	25.8432	25.558	25.7006	0.458525	1.21856	1.21856	6Mo-KO_1Way up vs WT	-1.47351	2.188	0.28518	A2ASS6	IELSPSMEAPK	1xPhospho [S6(100)]	1xPhospho [S4(0); S6(100)]	---	5.90373e-05	0.000420153	Ttn	titin	22138	Ttn	2 C3|2 45.13 cM	protein-coding	+0.5s	25.3633	25.6562	25.4646	26.2599	26.4721	24.9234	26.1712	25.191	26.3503	25.1543
386	497	Q3TZZ7_SSSSLLASPSHIAAK_2xPhospho [S4(99.6); S]_2xPhospho [S1(14.4); S2(14.4); S3(71.5); S4(99.6); S8(0); S10(0)]	Q3TZZ7	Esyt2	5	5	20.8901	21.0546	20.9723	0.459944	0.892275	-1.12073	6Mo-KO_1Way down vs WT	-1.57238	1.25186	-0.16444	Q3TZZ7	SSSSLLASPSHIAAK	2xPhospho [S4(99.6); S]	2xPhospho [S1(14.4); S2(14.4); S3(71.5); S4(99.6); S8(0); S10(0)]	NP_083007	0.154506	0.00912834	Esyt2	extended synaptotagmin-like protein 2	52635	Esyt2	12 F2|12 62.65 cM	protein-coding	-0.5s	20.9975	20.8604	21.2619	20.4402	20.8906	20.9121	21.3548	21.0311	20.5267	21.4481
442	498	P23242_MGQAGSTISNSHAQPFDFPDDSQNAK_1xOxidation [M1]; 2xPhospho [T7(81.3); S]_1xOxidation [M1]; 2xPhospho [S6(17.3); T7(81.3); S9(50.7); S11(50.7); S22(0)]	P23242	Gja1	5	5	26.266	26.0601	26.163	0.460258	1.15342	1.15342	6Mo-KO_1Way up vs WT	-1.32525	1.76309	0.20592	P23242	MGQAGSTISNSHAQPFDFPDDSQNAK	1xOxidation [M1]; 2xPhospho [T7(81.3); S]	1xOxidation [M1]; 2xPhospho [S6(17.3); T7(81.3); S9(50.7); S11(50.7); S22(0)]	NP_034418	0.00107837	0.000420153	Gja1	gap junction protein, alpha 1	14609	Gja1	10 B4|10 28.64 cM	protein-coding	+0.5s	26.2501	27.0163	26.4443	26.1688	25.4507	26.1788	25.7382	26.0524	26.1788	26.1524
944	499	Q9CQS8_PGPTPSGTNVGSSGRSPSK_1xPhospho [S/T]_1xPhospho [T4(0); S6(0); T8(0); S12(0.2); S13(49.4); S16(49.4); S18(1)]	Q9CQS8	Sec61b	5	5	19.9418	20.1546	20.0482	0.460303	0.862873	-1.15892	6Mo-KO_1Way down vs WT	-1.79679	1.3378	-0.21278	Q9CQS8	PGPTPSGTNVGSSGRSPSK	1xPhospho [S/T]	1xPhospho [T4(0); S6(0); T8(0); S12(0.2); S13(49.4); S16(49.4); S18(1)]	NP_077133	0.00832601	0.000644898	Sec61b	Sec61 beta subunit	66212	Sec61b	4|4 B1	protein-coding	-0.5s	19.5373	20.2524	19.6234	20.3854	19.9104	19.7306	19.7655	19.9481	20.8266	20.502
79	500	Q9QYC0_SPPDQSAVPNTPPSTPVKLEEDLPQEPTSR_2xPhospho [T15(90.2); T/S]_2xPhospho [S1(0); S6(0); T11(54.9); S14(54.9); T15(90.2); T28(0); S29(0)]	Q9QYC0	Add1	5	5	26.0018	26.1476	26.0747	0.46111	0.903865	-1.10636	6Mo-KO_1Way down vs WT	-1.49504	1.22141	-0.14582	Q9QYC0	SPPDQSAVPNTPPSTPVKLEEDLPQEPTSR	2xPhospho [T15(90.2); T/S]	2xPhospho [S1(0); S6(0); T11(54.9); S14(54.9); T15(90.2); T28(0); S29(0)]	NP_001019629	0.000420204	0.000420153	Add1	adducin 1 (alpha)	11518	Add1	5 B2|5 17.9 cM	protein-coding	-0.5s	26.2115	26.329	25.6898	26.1762	25.6026	26.316	26.1909	25.9444	26.4596	25.8273
339	501	E9Q557_SMSFQGIR_1xPhospho [S3(100)]_1xPhospho [S1(0); S3(100)]	E9Q557	Dsp	5	5	24.4697	24.1263	24.298	0.461744	1.26871	1.26871	6Mo-KO_1Way up vs WT	-1.60318	2.58051	0.34336	E9Q557	SMSFQGIR	1xPhospho [S3(100)]	1xPhospho [S1(0); S3(100)]	NP_076331	0.0215289	0.00109972	Dsp	desmoplakin	109620	Dsp	13|13 A3.3	protein-coding	+0.5s	24.0339	24.1849	24.1415	25.0602	24.9279	23.2828	24.7985	23.735	25.2834	23.5319
648	502	P53986_SKESLQEAGK_1xPhospho [S4(100)]_1xPhospho [S1(0); S4(100)]	P53986	Slc16a1	5	5	20.9987	22.9098	21.9542	0.462514	0.265882	-3.76106	6Mo-KO_1Way down vs WT	-197.066	13.9313	-1.91114	P53986	SKESLQEAGK	1xPhospho [S4(100)]	1xPhospho [S1(0); S4(100)]	NP_033222	0.000673166	0.000420153	Slc16a1	solute carrier family 16 (monocarboxylic acid transporters), member 1	20501	Slc16a1	3|3 F2.2	protein-coding	-3s	21.9423	21.4025	15.3372	21.1893	25.122	24.5282	25.5425	24.7886	24.3545	15.3352
627	503	P14873_ESSPLYSPGFSDSTSAAK_2xPhospho [S2(86.3); S3(99.6)]_2xPhospho [S2(86.3); S3(99.6); Y6(0); S7(14.1); S11(0); S13(0); T14(0); S15(0)]	P14873	Map1b	5	5	21.6391	21.1524	21.3957	0.462583	1.40124	1.40124	6Mo-KO_1Way up vs WT	-1.95616	3.84085	0.4867	P14873	ESSPLYSPGFSDSTSAAK	2xPhospho [S2(86.3); S3(99.6)]	2xPhospho [S2(86.3); S3(99.6); Y6(0); S7(14.1); S11(0); S13(0); T14(0); S15(0)]	NP_032660	0.00178907	0.000420153	Map1b	microtubule-associated protein 1B	17755	Map1b	13 D1|13 52.9 cM	protein-coding	+1s	21.9087	21.5558	21.9458	22.0143	20.7709	21.9381	19.2919	21.446	20.4428	22.6432
1366	504	A2ASS6_RRSLGDMSDEELLLPIDDYLAMK_2xPhospho [S3(100); S8(100)]_2xPhospho [S3(100); S8(100); Y19(0)]	A2ASS6	---	5	5	20.0112	21.1464	20.5788	0.46304	0.455272	-2.19649	6Mo-KO_1Way down vs WT	-23.1325	4.79473	-1.1352	A2ASS6	RRSLGDMSDEELLLPIDDYLAMK	2xPhospho [S3(100); S8(100)]	2xPhospho [S3(100); S8(100); Y19(0)]	---	0.000483676	0.000420153	Ttn	titin	22138	Ttn	2 C3|2 45.13 cM	protein-coding	-2s	21.686	20.0379	19.5993	20.1933	18.5395	24.4478	21.5269	17.3209	18.7153	23.7211
686	505	Q9QVP4_GSSNVFSMFEQAQIQEFK_1xDeamidated [Q/N]; 1xOxidation [M8]; 1xPhospho [S2(98.9)]_1xDeamidated [N4; Q11; Q13; Q15]; 1xOxidation [M8]; 1xPhospho [S2(98.9); S3(1.1); S7(0)]	Q9QVP4	Myl7	5	5	23.4413	22.7229	23.0821	0.463072	1.64527	1.64527	6Mo-KO_1Way up vs WT	-2.69659	7.29939	0.71832	Q9QVP4	GSSNVFSMFEQAQIQEFK	1xDeamidated [Q/N]; 1xOxidation [M8]; 1xPhospho [S2(98.9)]	1xDeamidated [N4; Q11; Q13; Q15]; 1xOxidation [M8]; 1xPhospho [S2(98.9); S3(1.1); S7(0)]	NP_075017	0.000295611	0.000420153	Myl7	myosin, light polypeptide 7, regulatory	17898	Myl7	11 A1|11 3.88 cM	protein-coding	+1s	21.2651	23.8747	23.9299	23.8952	24.2414	20.208	24.6438	23.6493	22.0877	23.0259
1124	506	D3Z5J3_RPHHSQPASACGSLSPASQTSPPSPPPPLVPPVPEDLHR_1xCarbamidomethyl [C11]; 1xDeamidated [Q]; 2xPhospho [S9(86.9); S/T]_1xCarbamidomethyl [C11]; 1xDeamidated [Q6; Q19]; 2xPhospho [S5(1); S9(86.9); S13(9.9); S15(4.6); S18(20.3); T20(6.9); S21(2.7); S24(67.8)]	D3Z5J3	Sorbs1	5	5	21.9456	21.4734	21.7095	0.463536	1.38728	1.38728	6Mo-KO_1Way up vs WT	-1.92175	3.6985	0.47226	D3Z5J3	RPHHSQPASACGSLSPASQTSPPSPPPPLVPPVPEDLHR	1xCarbamidomethyl [C11]; 1xDeamidated [Q]; 2xPhospho [S9(86.9); S/T]	1xCarbamidomethyl [C11]; 1xDeamidated [Q6; Q19]; 2xPhospho [S5(1); S9(86.9); S13(9.9); S15(4.6); S18(20.3); T20(6.9); S21(2.7); S24(67.8)]	NP_848139	0.00382138	0.000420153	Sorbs1	sorbin and SH3 domain containing 1	20411	Sorbs1	19 C3|19 34.25 cM	protein-coding	+1s	21.8885	22.6905	21.3743	21.2251	22.5498	21.326	22.9555	20.4657	20.1983	22.4214
537	507	Q9ET78_ESPQLHERETPQPEGGPPSPAGTPPQPK_3xPhospho [S2(99.9); T10(99.2); T23(99.9)]_3xPhospho [S2(99.9); T10(99.2); S19(1); T23(99.9)]	Q9ET78	Jph2	5	5	20.7456	21.44	21.0928	0.463624	0.617966	-1.61821	6Mo-KO_1Way down vs WT	-6.84447	2.61378	-0.6944	Q9ET78	ESPQLHERETPQPEGGPPSPAGTPPQPK	3xPhospho [S2(99.9); T10(99.2); T23(99.9)]	3xPhospho [S2(99.9); T10(99.2); S19(1); T23(99.9)]	NP_001192005	0.0340097	0.00203657	Jph2	junctophilin 2	59091	Jph2	2|2 H3	protein-coding	-1s	20.7082	21.2107	21.6596	19.4803	20.6692	20.7605	22.9794	21.4115	18.7393	23.3093
683	508	Q9QVP4_QAQRGSSNVFSMFEQAQIQEFK_1xOxidation [M12]; 1xPhospho [S]_1xOxidation [M12]; 1xPhospho [S6(50); S7(50); S11(0)]	Q9QVP4	Myl7	5	5	22.1691	21.7977	21.9834	0.464584	1.29363	1.29363	6Mo-KO_1Way up vs WT	-1.67469	2.80254	0.37142	Q9QVP4	QAQRGSSNVFSMFEQAQIQEFK	1xOxidation [M12]; 1xPhospho [S]	1xOxidation [M12]; 1xPhospho [S6(50); S7(50); S11(0)]	NP_075017	0.0198046	0.00109972	Myl7	myosin, light polypeptide 7, regulatory	17898	Myl7	11 A1|11 3.88 cM	protein-coding	+1s	21.5522	22.0975	21.6526	22.7717	22.7717	20.7124	21.8816	22.3507	22.9462	21.0977
1449	509	A0A498WFS2_SSPPATDPGPVPSSPSQEPPTKR_1xPhospho [S/T]_1xPhospho [S1(50); S2(50); T6(0); S13(0); S14(0); S16(0); T21(0)]	A0A498WFS2	---	5	5	23.9122	23.6446	23.7784	0.464757	1.2038	1.2038	6Mo-KO_1Way up vs WT	-1.45023	2.10159	0.2676	A0A498WFS2	SSPPATDPGPVPSSPSQEPPTKR	1xPhospho [S/T]	1xPhospho [S1(50); S2(50); T6(0); S13(0); S14(0); S16(0); T21(0)]	---	3.8983e-05	0.000420153	Ubxn1	UBX domain protein 1	225896	Ubxn1	19|19 A	protein-coding	+0.5s	23.4633	23.715	23.8377	24.2838	24.2613	23.5071	24.1116	23.9302	24.1788	22.4954
378	510	Q9Z1D1_GIPLPTGDTSPEPELLPGDPLPPPK_1xPhospho [S/T]_1xPhospho [T6(18.4); T9(18.4); S10(63.2)]	Q9Z1D1	Eif3g	5	5	21.16	21.3478	21.2539	0.464826	0.877931	-1.13904	6Mo-KO_1Way down vs WT	-1.68428	1.29818	-0.18782	Q9Z1D1	GIPLPTGDTSPEPELLPGDPLPPPK	1xPhospho [S/T]	1xPhospho [T6(18.4); T9(18.4); S10(63.2)]	NP_058572	0.121276	0.00595432	Eif3g	eukaryotic translation initiation factor 3, subunit G	53356	Eif3g	9|9 A3	protein-coding	-0.5s	21.333	21.0116	21.0264	21.1025	21.3265	20.8614	21.6338	21.0267	22.1279	21.0893
586	511	Q9JKS4_DPALDTNGSLATPSPSPEAR_1xDeamidated [N7]; 1xPhospho [S16(99.9)]_1xDeamidated [N7]; 1xPhospho [T6(0); S9(0); T12(0); S14(0.1); S16(99.9)]	Q9JKS4	Ldb3	5	5	26.7628	26.5193	26.641	0.464869	1.18384	1.18384	6Mo-KO_1Way up vs WT	-1.40263	1.96577	0.24348	Q9JKS4	DPALDTNGSLATPSPSPEAR	1xDeamidated [N7]; 1xPhospho [S16(99.9)]	1xDeamidated [N7]; 1xPhospho [T6(0); S9(0); T12(0); S14(0.1); S16(99.9)]	NP_001034160	5.04453e-07	0.000420153	Ldb3	LIM domain binding 3	24131	Ldb3	14|14 B	protein-coding	+0.5s	26.4321	27.0791	26.8324	27.1779	26.2926	26.0524	26.7909	26.4358	27.3895	25.9281
726	512	Q9JJW5_SPPNPENIAPGYSGPLK_1xPhospho [S1(100)]_1xPhospho [S1(100); Y12(0); S13(0)]	Q9JJW5	Myoz2	5	5	28.3048	28.0395	28.1721	0.465095	1.20185	1.20185	6Mo-KO_1Way up vs WT	-1.44615	2.08889	0.26526	Q9JJW5	SPPNPENIAPGYSGPLK	1xPhospho [S1(100)]	1xPhospho [S1(100); Y12(0); S13(0)]	NP_067478	1.88411e-07	0.000420153	Myoz2	myozenin 2	59006	Myoz2	3|3 G1	protein-coding	+0.5s	27.7428	28.1394	27.9015	28.831	28.9091	27.6064	28.6982	27.8714	28.5551	27.4664
803	513	Q3B7Z2_MLAESDDSGDEESVSQTDKTELQSTLR_1xDeamidated [Q]; 2xPhospho [S5(100); S8(99.9)]_1xDeamidated [Q16; Q23]; 2xPhospho [S5(100); S8(99.9); S13(0.1); S15(0); T17(0); T20(0); S24(0); T25(0)]	Q3B7Z2	Osbp	5	5	21.2168	20.5298	20.8733	0.465119	1.60993	1.60993	6Mo-KO_1Way up vs WT	-2.60001	6.73892	0.687	Q3B7Z2	MLAESDDSGDEESVSQTDKTELQSTLR	1xDeamidated [Q]; 2xPhospho [S5(100); S8(99.9)]	1xDeamidated [Q16; Q23]; 2xPhospho [S5(100); S8(99.9); S13(0.1); S15(0); T17(0); T20(0); S24(0); T25(0)]	NP_001028346	0.00268948	0.000420153	Osbp	oxysterol binding protein	76303	Osbp	19 A|19 8.58 cM	protein-coding	+1s	21.0024	20.8304	21.5163	21.5127	21.2222	21.258	20.1231	17.4134	21.1026	22.7519
1420	514	Q8C996_SPPGPGVPRPPPR_1xPhospho [S1(100)]_1xPhospho [S1(100)]	Q8C996	Tmem163	5	5	23.6941	23.4534	23.5738	0.465225	1.18155	1.18155	6Mo-KO_1Way up vs WT	-1.39776	1.95136	0.24068	Q8C996	SPPGPGVPRPPPR	1xPhospho [S1(100)]	1xPhospho [S1(100)]	NP_082411	0.0668741	0.00288454	Tmem163	transmembrane protein 163	72160	Tmem163	1|1 E3	protein-coding	+0.5s	23.3798	23.2722	23.2102	24.1309	24.4772	23.5557	23.9008	23.1977	23.7163	22.8964
918	515	Q8K2F8_SPTMEQAVQTASAHLPAPAPVGR_1xPhospho [T3(97.1)]_1xPhospho [S1(2.9); T3(97.1); T10(0); S12(0)]	Q8K2F8	Lsm14a	5	5	22.3555	21.8519	22.1037	0.466154	1.41781	1.41781	6Mo-KO_1Way up vs WT	-2.01988	4.06031	0.50366	Q8K2F8	SPTMEQAVQTASAHLPAPAPVGR	1xPhospho [T3(97.1)]	1xPhospho [S1(2.9); T3(97.1); T10(0); S12(0)]	NP_080224	0.00288526	0.000420153	Lsm14a	LSM14A mRNA processing body assembly factor	67070	Lsm14a	7|7 B1	protein-coding	+1s	21.6526	22.6258	21.9672	23.0748	22.4573	20.0417	22.5698	21.5926	23.6782	21.3771
714	516	E9Q9T8_RTSDSHEDAGTLDFSSLLK_1xPhospho [T/S]_1xPhospho [T2(50); S3(50); S5(0); T11(0); S15(0); S16(0)]	E9Q9T8	---	5	5	28.1065	27.8519	27.9792	0.46676	1.19294	1.19294	6Mo-KO_1Way up vs WT	-1.42764	2.03168	0.25452	E9Q9T8	RTSDSHEDAGTLDFSSLLK	1xPhospho [T/S]	1xPhospho [T2(50); S3(50); S5(0); T11(0); S15(0); S16(0)]	---	1.08326e-08	0.000420153	Mybpc3	myosin binding protein C, cardiac	17868	Mybpc3	2|2 E1	protein-coding	+0.5s	27.5249	28.0634	27.8408	28.5516	28.5516	27.1391	28.3115	27.6486	28.6034	27.5571
127	517	Q7TQH0_RSPGGTSPPNGGLPGPLTATAAPPGPPAAVSPCLGPAAAAGSGLR_1xCarbamidomethyl [C33]; 1xDeamidated [N10]; 2xPhospho [S2(89.2); S/T]_1xCarbamidomethyl [C33]; 1xDeamidated [N10]; 2xPhospho [S2(89.2); T6(36.2); S7(73.9); T18(0.3); T20(0.3); S31(0); S42(0)]	Q7TQH0	Atxn2l	5	5	21.2627	21.6867	21.4747	0.467337	0.745345	-1.34166	6Mo-KO_1Way down vs WT	-3.26131	1.81178	-0.42402	Q7TQH0	RSPGGTSPPNGGLPGPLTATAAPPGPPAAVSPCLGPAAAAGSGLR	1xCarbamidomethyl [C33]; 1xDeamidated [N10]; 2xPhospho [S2(89.2); S/T]	1xCarbamidomethyl [C33]; 1xDeamidated [N10]; 2xPhospho [S2(89.2); T6(36.2); S7(73.9); T18(0.3); T20(0.3); S31(0); S42(0)]	NP_898841	0.0132142	0.00109972	Atxn2l	ataxin 2-like	233871	Atxn2l	7|7 F3	protein-coding	-1s	21.9339	20.1933	22.0702	21.1468	20.9691	21.9057	20.4089	22.7463	20.9698	22.4027
543	518	A0A0G2JDH4_RASPGLSMPSSSPPIKK_2xPhospho [S3(99.6); S]_2xPhospho [S3(99.6); S7(1.3); S10(15.3); S11(15.3); S12(68.5)]	A0A0G2JDH4	---	5	5	22.8251	22.9604	22.8927	0.467515	0.910443	-1.09837	6Mo-KO_1Way down vs WT	-1.45862	1.20906	-0.13536	A0A0G2JDH4	RASPGLSMPSSSPPIKK	2xPhospho [S3(99.6); S]	2xPhospho [S3(99.6); S7(1.3); S10(15.3); S11(15.3); S12(68.5)]	---	0.109308	0.00489296	Klf3	Kruppel-like factor 3 (basic)	16599	Klf3	5|5 C3.1	protein-coding	-0.5s	23.2597	22.7524	22.6019	22.5167	22.9946	23.3225	22.9035	22.7877	23.1053	22.6831
1024	519	E9PUK6_RRTASPPPPPK_2xPhospho [T3(100); S5(100)]_2xPhospho [T3(100); S5(100)]	E9PUK6	Srrm1	5	5	22.4485	22.7257	22.5871	0.467604	0.825191	-1.21184	6Mo-KO_1Way down vs WT	-2.16662	1.47534	-0.2772	E9PUK6	RRTASPPPPPK	2xPhospho [T3(100); S5(100)]	2xPhospho [T3(100); S5(100)]	NP_058079	0.124447	0.00595432	Srrm1	serine/arginine repetitive matrix 1	51796	Srrm1	4|4 D3	protein-coding	-0.5s	22.9396	22.447	22.9869	22.4343	21.4346	22.7492	22.6208	22.8436	23.4345	21.9803
110	520	Q8K4L2_SISFPEVPRSPK_2xPhospho [S3(100); S10(100)]_2xPhospho [S1(0); S3(100); S10(100)]	Q8K4L2	---	5	5	25.3664	25.5827	25.4746	0.468172	0.860758	-1.16177	6Mo-KO_1Way down vs WT	-1.82935	1.35537	-0.21632	Q8K4L2	SISFPEVPRSPK	2xPhospho [S3(100); S10(100)]	2xPhospho [S1(0); S3(100); S10(100)]	---	5.23829e-05	0.000420153	Svil	supervillin	225115	Svil	18|18 A1	protein-coding	-0.5s	25.0179	25.5165	25.4218	25.6898	25.186	25.5976	26.4225	25.248	25.7568	24.8887
1380	521	A2ASS6_VKSPETVKSPK_2xPhospho [S3(100); S9(100)]_2xPhospho [S3(100); T6(0); S9(100)]	A2ASS6	---	5	5	31.3493	31.5938	31.4716	0.46894	0.84412	-1.18467	6Mo-KO_1Way down vs WT	-1.9808	1.4114	-0.24448	A2ASS6	VKSPETVKSPK	2xPhospho [S3(100); S9(100)]	2xPhospho [S3(100); T6(0); S9(100)]	---	0.0321823	0.00181132	Ttn	titin	22138	Ttn	2 C3|2 45.13 cM	protein-coding	-0.5s	31.737	31.1052	31.1052	31.4966	31.3027	31.4988	31.7391	32.4193	31.7391	30.5728
831	522	Q149B8_APHSPESPGHSDNPQSSPDSLEASPR_2xPhospho [S16(99.5); S17(94.1)]_2xPhospho [S4(0); S7(0); S11(0); S16(99.5); S17(94.1); S20(6.2); S24(0)]	Q149B8	Perm1	5	5	24.4656	24.9717	24.7187	0.469691	0.704104	-1.42025	6Mo-KO_1Way down vs WT	-4.1243	2.04467	-0.50614	Q149B8	APHSPESPGHSDNPQSSPDSLEASPR	2xPhospho [S16(99.5); S17(94.1)]	2xPhospho [S4(0); S7(0); S11(0); S16(99.5); S17(94.1); S20(6.2); S24(0)]	NP_766005	0.0242277	0.00109972	Perm1	PPARGC1 and ESRR induced regulator, muscle 1	74183	Perm1	4|4 E2	protein-coding	-1s	25.2515	24.9484	24.8821	24.5139	22.732	26.2161	23.742	25.3855	23.8797	25.6353
1194	523	A0A087WSE3_GTPDSPAQPAAAPR_1xPhospho [S5(99.9)]_1xPhospho [T2(0.1); S5(99.9)]	A0A087WSE3	---	5	5	23.5748	24.1593	23.867	0.470024	0.666862	-1.49956	6Mo-KO_1Way down vs WT	-5.1414	2.2864	-0.58454	A0A087WSE3	GTPDSPAQPAAAPR	1xPhospho [S5(99.9)]	1xPhospho [T2(0.1); S5(99.9)]	---	0.0401223	0.00237867	Speg	SPEG complex locus	11790	Speg	1 C4|1 38.88 cM	protein-coding	-1s	22.0398	22.4059	24.4772	24.9652	23.9858	24.8887	24.6613	24.8097	24.2834	22.1535
824	524	Q5SWV3_IHIDPESQDCSPATSR_1xCarbamidomethyl [C10]; 2xPhospho [S7(100); S11(100)]_1xCarbamidomethyl [C10]; 2xPhospho [S7(100); S11(100); T14(0); S15(0)]	Q5SWV3	---	5	5	23.5827	22.5498	23.0663	0.471707	2.04619	2.04619	6Mo-KO_1Way up vs WT	-4.34887	18.2083	1.03294	Q5SWV3	IHIDPESQDCSPATSR	1xCarbamidomethyl [C10]; 2xPhospho [S7(100); S11(100)]	1xCarbamidomethyl [C10]; 2xPhospho [S7(100); S11(100); T14(0); S15(0)]	---	0.0686998	0.00288454	Pdlim4	PDZ and LIM domain 4	30794	Pdlim4	11 B1.3|11 32.13 cM	protein-coding	+2s	22.0143	26.9051	22.037	20.525	26.4321	22.7428	23.7685	22.1318	21.0893	23.0164
963	525	Q61193_SASCGSPLSGNTGEGTSR_1xCarbamidomethyl [C4]; 1xPhospho [S3(96.3)]_1xCarbamidomethyl [C4]; 1xPhospho [S1(3.6); S3(96.3); S6(0.1); S9(0); T12(0); T16(0); S17(0)]	Q61193	Rgl2	5	5	19.8145	19.5848	19.6996	0.472539	1.17264	1.17264	6Mo-KO_1Way up vs WT	-1.38806	1.90869	0.22976	Q61193	SASCGSPLSGNTGEGTSR	1xCarbamidomethyl [C4]; 1xPhospho [S3(96.3)]	1xCarbamidomethyl [C4]; 1xPhospho [S1(3.6); S3(96.3); S6(0.1); S9(0); T12(0); T16(0); S17(0)]	NP_033085	0.00506046	0.000644898	Rgl2	ral guanine nucleotide dissociation stimulator-like 2	19732	Rgl2	17|17 B1	protein-coding	+0.5s	19.2448	19.5373	19.5815	20.5757	20.1334	19.0832	19.4781	19.4492	20.2422	19.6712
27	526	E9Q4Z2_ASLGTLSQEAALNTSDPESHAPTMRPSMSGLHLVK_2xPhospho [S2(83.9); S/T]_2xPhospho [S2(83.9); T5(11.3); S7(4.4); T14(0.2); S15(0.1); S19(0.3); T23(9); S27(23.9); S29(66.8)]	E9Q4Z2	Acacb	5	5	22.137	21.7056	21.9213	0.473127	1.34856	1.34856	6Mo-KO_1Way up vs WT	-1.85329	3.37042	0.43142	E9Q4Z2	ASLGTLSQEAALNTSDPESHAPTMRPSMSGLHLVK	2xPhospho [S2(83.9); S/T]	2xPhospho [S2(83.9); T5(11.3); S7(4.4); T14(0.2); S15(0.1); S19(0.3); T23(9); S27(23.9); S29(66.8)]	NP_598665	0.148781	0.0084421	Acacb	acetyl-Coenzyme A carboxylase beta	100705	Acacb	5|5 F	protein-coding	+1s	21.8432	21.9827	20.6816	22.5843	23.5932	22.047	22.6606	20.9065	21.7949	21.1189
995	527	Q0VBL3_SRSPLDKDAYAPSSSVVGTSVGSHR_2xPhospho [S1(100); S3(100)]_2xPhospho [S1(100); S3(100); Y10(0); S13(0); S14(0); S15(0); T19(0); S20(0); S23(0)]	Q0VBL3	Rbm15	5	5	24.4621	24.6602	24.5612	0.473872	0.871734	-1.14714	6Mo-KO_1Way down vs WT	-1.74802	1.32836	-0.19804	Q0VBL3	SRSPLDKDAYAPSSSVVGTSVGSHR	2xPhospho [S1(100); S3(100)]	2xPhospho [S1(100); S3(100); Y10(0); S13(0); S14(0); S15(0); T19(0); S20(0); S23(0)]	NP_001039272	1.88886e-05	0.000420153	Rbm15	RNA binding motif protein 15	229700	Rbm15	3|3 F2.3	protein-coding	-0.5s	24.8228	23.9136	24.6871	24.5024	24.3847	25.2555	24.5482	24.8468	23.9554	24.6949
316	528	Q3U3M5_KPSPQPSPPR_2xPhospho [S3(100); S7(100)]_2xPhospho [S3(100); S7(100)]	Q3U3M5	Ccnk	5	5	23.5014	23.6535	23.5774	0.474384	0.899927	-1.1112	6Mo-KO_1Way down vs WT	-1.5363	1.2442	-0.15212	Q3U3M5	KPSPQPSPPR	2xPhospho [S3(100); S7(100)]	2xPhospho [S3(100); S7(100)]	NP_033962	6.46908e-05	0.000420153	Ccnk	cyclin K	12454	Ccnk	12 F1|12 59.23 cM	protein-coding	-0.5s	23.8064	23.5495	23.6975	23.3037	23.1497	23.9177	23.1131	24.0473	23.6173	23.572
694	529	Q9QVP4_QAQRGSSNVFSMFEQAQIQEFK_1xPhospho [S]_1xPhospho [S6(50); S7(50); S11(0)]	Q9QVP4	Myl7	5	5	22.187	22.525	22.356	0.474412	0.791104	-1.26406	6Mo-KO_1Way down vs WT	-2.59675	1.62517	-0.33806	Q9QVP4	QAQRGSSNVFSMFEQAQIQEFK	1xPhospho [S]	1xPhospho [S6(50); S7(50); S11(0)]	NP_075017	0.0198046	0.00109972	Myl7	myosin, light polypeptide 7, regulatory	17898	Myl7	11 A1|11 3.88 cM	protein-coding	-0.5s	21.9789	21.4901	21.4089	22.4513	23.6056	22.4287	23.156	21.9842	22.7934	22.2628
314	530	Q14AX6_HSSISPVRLPLNSSLGAELSR_2xPhospho [S5(99.4); S]_2xPhospho [S2(50.3); S3(50.3); S5(99.4); S13(0); S14(0); S20(0)]	Q14AX6	Cdk12	5	5	21.7045	21.8318	21.7681	0.474924	0.915543	-1.09225	6Mo-KO_1Way down vs WT	-1.43284	1.20104	-0.1273	Q14AX6	HSSISPVRLPLNSSLGAELSR	2xPhospho [S5(99.4); S]	2xPhospho [S2(50.3); S3(50.3); S5(99.4); S13(0); S14(0); S20(0)]	NP_001103096	0.0199429	0.00109972	Cdk12	cyclin-dependent kinase 12	69131	Cdk12	11 D|11 61.75 cM	protein-coding	-0.5s	21.8326	21.3364	21.4938	21.8297	22.0301	21.8658	21.9105	21.5687	22.1993	21.6148
590	531	Q9JKS4_DPALDTNGSLATPSPSPEAR_1xPhospho [S16(99.9)]_1xPhospho [T6(0); S9(0); T12(0); S14(0.1); S16(99.9)]	Q9JKS4	Ldb3	5	5	22.6303	22.3807	22.5055	0.475278	1.18891	1.18891	6Mo-KO_1Way up vs WT	-1.43287	2.02537	0.24964	Q9JKS4	DPALDTNGSLATPSPSPEAR	1xPhospho [S16(99.9)]	1xPhospho [T6(0); S9(0); T12(0); S14(0.1); S16(99.9)]	NP_001034160	5.04453e-07	0.000420153	Ldb3	LIM domain binding 3	24131	Ldb3	14|14 B	protein-coding	+0.5s	21.9865	22.3538	23.4417	22.6986	22.671	21.7157	22.5535	22.0122	22.6016	23.0204
852	532	Q9CQ73_TSSVPEYVYK_1xPhospho [S3(99.6)]_1xPhospho [T1(0); S2(0.4); S3(99.6); Y7(0); Y9(0)]	Q9CQ73	Pkp2	5	5	24.9074	24.5806	24.744	0.47697	1.25423	1.25423	6Mo-KO_1Way up vs WT	-1.6058	2.52606	0.3268	Q9CQ73	TSSVPEYVYK	1xPhospho [S3(99.6)]	1xPhospho [T1(0); S2(0.4); S3(99.6); Y7(0); Y9(0)]	NP_080439	0.00150071	0.000420153	Pkp2	plakophilin 2	67451	Pkp2	16|16 A2	protein-coding	+0.5s	24.2066	24.9393	24.753	25.5372	25.1007	23.5822	24.7592	24.4285	25.8921	24.2408
728	533	Q9JJW5_AQINHNIAMQNGRVDGSNLEGGSQQGPSTPPNTPDPR_2xDeamidated [N/Q]; 2xPhospho [T33(93.4); T/S]_2xDeamidated [Q2; N4; N6; Q10; N11; N18; N32]; 2xPhospho [S17(0.1); S23(15.2); S28(45.1); T29(46.1); T33(93.4)]	Q9JJW5	Myoz2	5	5	22.5543	21.9752	22.2647	0.4785	1.49392	1.49392	6Mo-KO_1Way up vs WT	-2.32503	5.18897	0.5791	Q9JJW5	AQINHNIAMQNGRVDGSNLEGGSQQGPSTPPNTPDPR	2xDeamidated [N/Q]; 2xPhospho [T33(93.4); T/S]	2xDeamidated [Q2; N4; N6; Q10; N11; N18; N32]; 2xPhospho [S17(0.1); S23(15.2); S28(45.1); T29(46.1); T33(93.4)]	NP_067478	0.0576299	0.00252693	Myoz2	myozenin 2	59006	Myoz2	3|3 G1	protein-coding	+1s	23.3254	22.1826	22.671	22.3228	22.2698	21.4115	20.3213	23.572	20.6334	23.9379
389	534	Q3UQN2_VSIGNITLSPAVSRHSPVQMNR_2xPhospho [S9(99.3); S13(84.7)]_2xPhospho [S2(0); T7(0.7); S9(99.3); S13(84.7); S16(15.2)]	Q3UQN2	Fcho2	5	5	21.4429	21.1791	21.311	0.47859	1.2006	1.2006	6Mo-KO_1Way up vs WT	-1.46875	2.11713	0.26376	Q3UQN2	VSIGNITLSPAVSRHSPVQMNR	2xPhospho [S9(99.3); S13(84.7)]	2xPhospho [S2(0); T7(0.7); S9(99.3); S13(84.7); S16(15.2)]	NP_766179	0.086809	0.00360171	Fcho2	FCH domain only 2	218503	Fcho2	13|13 D1	protein-coding	+0.5s	21.543	21.2651	20.6726	21.2001	22.5336	21.0868	21.8766	21.0416	20.8681	21.0225
1154	535	B2RXQ9_KSEPAVGPLR_1xPhospho [S2(100)]_1xPhospho [S2(100)]	B2RXQ9	Sorbs2	5	5	21.4537	21.6978	21.5757	0.479076	0.844342	-1.18435	6Mo-KO_1Way down vs WT	-2.00321	1.42812	-0.2441	B2RXQ9	KSEPAVGPLR	1xPhospho [S2(100)]	1xPhospho [S2(100)]	NP_001297636	0.0215289	0.00109972	Sorbs2	sorbin and SH3 domain containing 2	234214	Sorbs2	8|8 B1.1	protein-coding	-0.5s	20.8776	21.4561	21.8462	22.0017	21.0867	21.6148	21.1061	21.4824	21.6727	22.6128
344	536	Q60596_TQAAGPSSPPRPPTPK_2xPhospho [S8(89.4); T14(100)]_2xPhospho [T1(0); S7(10.6); S8(89.4); T14(100)]	Q60596	Xrcc1	5	5	25.6999	25.5124	25.6061	0.480006	1.13879	1.13879	6Mo-KO_1Way up vs WT	-1.31602	1.70667	0.1875	Q60596	TQAAGPSSPPRPPTPK	2xPhospho [S8(89.4); T14(100)]	2xPhospho [T1(0); S7(10.6); S8(89.4); T14(100)]	NP_033558	0.000326204	0.000420153	Xrcc1	X-ray repair complementing defective repair in Chinese hamster cells 1	22594	Xrcc1	7 A3|7 11.42 cM	protein-coding	+0.5s	25.8114	25.4081	25.4081	25.6465	26.2255	25.5201	26.075	25.1973	25.8156	24.9541
521	537	Q9QXM1_RKSTASPVPCEEQCHSLPTVLQGQEK_2xCarbamidomethyl [C10; C14]; 2xPhospho [S3(97.2); S6(97.2)]_2xCarbamidomethyl [C10; C14]; 2xPhospho [S3(97.2); T4(5.7); S6(97.2); S16(0); T19(0)]	Q9QXM1	Jmy	5	5	25.0351	24.903	24.969	0.480499	1.09587	1.09587	6Mo-KO_1Way up vs WT	-1.21382	1.45772	0.13208	Q9QXM1	RKSTASPVPCEEQCHSLPTVLQGQEK	2xCarbamidomethyl [C10; C14]; 2xPhospho [S3(97.2); S6(97.2)]	2xCarbamidomethyl [C10; C14]; 2xPhospho [S3(97.2); T4(5.7); S6(97.2); S16(0); T19(0)]	NP_067285	0.00387543	0.000420153	Jmy	junction-mediating and regulatory protein	57748	Jmy	13|13 C3	protein-coding	+0.5s	25.1495	24.762	24.9279	24.9568	25.3791	25.0025	25.248	24.8956	24.9919	24.3769
300	538	E9Q6L0_SRSDIDVNAAASAK_1xPhospho [S3(98.8)]_1xPhospho [S1(1.2); S3(98.8); S12(0)]	E9Q6L0	Clasp1	5	5	22.6161	22.4721	22.5441	0.480577	1.105	1.105	6Mo-KO_1Way up vs WT	-1.23538	1.50842	0.14404	E9Q6L0	SRSDIDVNAAASAK	1xPhospho [S3(98.8)]	1xPhospho [S1(1.2); S3(98.8); S12(0)]	NP_001280230	0.0224458	0.00109972	Clasp1	CLIP associating protein 1	76707	Clasp1	1|1 E2.3	protein-coding	+0.5s	22.3028	22.5609	22.5054	23.2422	22.4692	22.3034	22.3205	22.6955	22.7706	22.2703
676	539	Q3UIZ8_LSSGPLPQPLGPLTPDSDIHSGDALPR_2xPhospho [T14(100); S17(99.9)]_2xPhospho [S2(0); S3(0); T14(100); S17(99.9); S21(0.1)]	Q3UIZ8	Mylk3	5	5	22.0188	22.4127	22.2157	0.48067	0.761091	-1.3139	6Mo-KO_1Way down vs WT	-3.0777	1.78278	-0.39386	Q3UIZ8	LSSGPLPQPLGPLTPDSDIHSGDALPR	2xPhospho [T14(100); S17(99.9)]	2xPhospho [S2(0); S3(0); T14(100); S17(99.9); S21(0.1)]	NP_001284541	0.0412401	0.00237867	Mylk3	myosin light chain kinase 3	213435	Mylk3	8|8 C3	protein-coding	-1s	21.2251	22.8753	22.8975	22.4549	20.6414	23.1277	21.9973	21.7588	22.9602	22.2195
414	540	E9PUK3_RHSSDINHLVTQGRESPEGSYTDDANQEVR_1xDeamidated [Q12]; 2xPhospho [S4(94.4); S16(91.9)]_1xDeamidated [N7; Q12; N26]; 2xPhospho [S3(5.6); S4(94.4); T11(1.4); S16(91.9); S20(5.4); Y21(0); T22(1.4)]	E9PUK3	Fnbp1l	5	5	24.022	24.4686	24.2453	0.48104	0.73376	-1.36284	6Mo-KO_1Way down vs WT	-3.58089	1.92797	-0.44662	E9PUK3	RHSSDINHLVTQGRESPEGSYTDDANQEVR	1xDeamidated [Q12]; 2xPhospho [S4(94.4); S16(91.9)]	1xDeamidated [N7; Q12; N26]; 2xPhospho [S3(5.6); S4(94.4); T11(1.4); S16(91.9); S20(5.4); Y21(0); T22(1.4)]	NP_694758	0.000601518	0.000420153	Fnbp1l	formin binding protein 1-like	214459	Fnbp1l	3|3 G1	protein-coding	-1s	23.8319	24.1041	24.0762	23.2749	24.8228	23.782	26.1788	23.4387	23.5764	25.3671
172	541	Q8R149_HDTPDPSPPRK_2xPhospho [T3(100); S7(100)]_2xPhospho [T3(100); S7(100)]	Q8R149	Bud13	5	5	20.8148	21.2532	21.034	0.48113	0.737922	-1.35516	6Mo-KO_1Way down vs WT	-3.49911	1.90537	-0.43846	Q8R149	HDTPDPSPPRK	2xPhospho [T3(100); S7(100)]	2xPhospho [T3(100); S7(100)]	NP_666112	0.0482783	0.00237867	Bud13	BUD13 homolog	215051	Bud13	9|9 A5.2	protein-coding	-1s	21.6299	21.2399	21.5598	20.9507	18.6935	21.4017	20.5533	21.7157	21.7425	20.8529
1177	542	Q60598_AKKQTPPASPSPQPIEDRPPSSPIYEDAAPFK_3xPhospho [T5(97.4); S9(86.3); S/Y]_3xPhospho [T5(97.4); S9(86.3); S11(16.4); S21(48); S22(48); Y25(4.1)]	Q60598	Cttn	5	5	22.7347	23.0064	22.8706	0.481537	0.82832	-1.20726	6Mo-KO_1Way down vs WT	-2.17454	1.49198	-0.27174	Q60598	AKKQTPPASPSPQPIEDRPPSSPIYEDAAPFK	3xPhospho [T5(97.4); S9(86.3); S/Y]	3xPhospho [T5(97.4); S9(86.3); S11(16.4); S21(48); S22(48); Y25(4.1)]	NP_031829	0.132701	0.00686468	Cttn	cortactin	13043	Cttn	7|7 F5	protein-coding	-0.5s	22.3827	22.9731	22.9433	23.4373	21.937	23.3783	23.5416	23.3327	22.5698	22.2097
548	543	Q61029_GPPDFSSDEEREPTPVLGSGASVGR_2xPhospho [T14(99.5); S]_2xPhospho [S6(50.3); S7(50.3); T14(99.5); S19(0); S22(0)]	Q61029	Tmpo	5	5	21.3282	20.6827	21.0054	0.48155	1.5643	1.5643	6Mo-KO_1Way up vs WT	-2.587	6.3305	0.64552	Q61029	GPPDFSSDEEREPTPVLGSGASVGR	2xPhospho [T14(99.5); S]	2xPhospho [S6(50.3); S7(50.3); T14(99.5); S19(0); S22(0)]	NP_001073598	0.0499552	0.00252693	Tmpo	thymopoietin	21917	Tmpo	10 C2|10 45.66 cM	protein-coding	+1s	22.138	22.4171	21.7842	21.7937	18.5079	21.6077	19.4262	20.8266	19.6351	21.9177
42	544	E9Q4K0_TSSPSSAGSVSLGHYTPTSR_2xPhospho [S3(97); T/S/Y]_2xPhospho [T1(1.5); S2(1.5); S3(97); S5(0); S6(0); S9(0); S11(0); Y15(0); T16(33.3); T18(33.3); S19(33.3)]	E9Q4K0	Ablim2	5	5	22.7844	22.5712	22.6778	0.481934	1.15926	1.15926	6Mo-KO_1Way up vs WT	-1.36936	1.84025	0.2132	E9Q4K0	TSSPSSAGSVSLGHYTPTSR	2xPhospho [S3(97); T/S/Y]	2xPhospho [T1(1.5); S2(1.5); S3(97); S5(0); S6(0); S9(0); S11(0); Y15(0); T16(33.3); T18(33.3); S19(33.3)]	NP_001171167	0.00412828	0.000644898	Ablim2	actin-binding LIM protein 2	231148	Ablim2	5|5 B3	protein-coding	+0.5s	22.696	22.4343	22.2918	22.732	23.7679	22.4726	22.9602	22.2147	22.7428	22.4657
1402	545	E9QAJ7_ISYTPPESPVASHR_2xPhospho [T4(100); S8(99.1)]_2xPhospho [S2(0); Y3(0); T4(100); S8(99.1); S12(0.9)]	E9QAJ7	---	5	5	22.5779	22.4553	22.5166	0.482009	1.08868	1.08868	6Mo-KO_1Way up vs WT	-1.19815	1.42008	0.12258	E9QAJ7	ISYTPPESPVASHR	2xPhospho [T4(100); S8(99.1)]	2xPhospho [S2(0); Y3(0); T4(100); S8(99.1); S12(0.9)]	---	0.00011277	0.000420153	Etv6	ets variant 6	14011	Etv6	6 G1|6 64.58 cM	protein-coding	+0.5s	22.9173	22.386	22.6379	22.6099	22.3385	22.9296	22.1836	22.4379	22.4693	22.2563
1195	546	A0A087WSE3_VPTVPPRPGSSLSGSIENLESEAVFEAK_1xDeamidated [N18]; 2xPhospho [S11(82.8); S15(83.2)]_1xDeamidated [N18]; 2xPhospho [T3(0); S10(1.6); S11(82.8); S13(32.1); S15(83.2); S21(0.4)]	A0A087WSE3	---	5	5	23.6156	23.8861	23.7508	0.482486	0.829055	-1.20619	6Mo-KO_1Way down vs WT	-2.16944	1.49113	-0.27046	A0A087WSE3	VPTVPPRPGSSLSGSIENLESEAVFEAK	1xDeamidated [N18]; 2xPhospho [S11(82.8); S15(83.2)]	1xDeamidated [N18]; 2xPhospho [T3(0); S10(1.6); S11(82.8); S13(32.1); S15(83.2); S21(0.4)]	---	0.000202189	0.000420153	Speg	SPEG complex locus	11790	Speg	1 C4|1 38.88 cM	protein-coding	-0.5s	24.1513	23.2749	24.0069	23.8856	22.7594	23.8956	24.8548	23.6631	23.3327	23.6842
598	547	P14152_KLSSAMSAAK_1xPhospho [S]_1xPhospho [S3(48); S4(48); S7(4)]	P14152	Mdh1	5	5	25.0073	24.7871	24.8972	0.482815	1.16486	1.16486	6Mo-KO_1Way up vs WT	-1.38486	1.87913	0.22016	P14152	KLSSAMSAAK	1xPhospho [S]	1xPhospho [S3(48); S4(48); S7(4)]	NP_001303604	0.00200205	0.000420153	Mdh1	malate dehydrogenase 1, NAD (soluble)	17449	Mdh1	11 A3.1|11 13.89 cM	protein-coding	+0.5s	24.6288	25.0353	24.6288	25.2676	25.476	24.0072	25.1636	24.9541	25.3579	24.4529
1325	548	A2ASS6_SPETVKSPK_1xPhospho [S7(100)]_1xPhospho [S1(0); T4(0); S7(100)]	A2ASS6	---	5	5	22.5853	21.8524	22.2188	0.483284	1.662	1.662	6Mo-KO_1Way up vs WT	-2.9615	8.18039	0.73292	A2ASS6	SPETVKSPK	1xPhospho [S7(100)]	1xPhospho [S1(0); T4(0); S7(100)]	---	0.00042317	0.000420153	Ttn	titin	22138	Ttn	2 C3|2 45.13 cM	protein-coding	+1s	22.6455	22.3171	22.5256	21.799	23.6394	21.8532	23.8174	18.9627	20.6657	23.963
1234	549	Q8BWB1_TLPQVSPKTPPPMAPKTPPPTTPK_2xPhospho [T9(99.2); T17(95.7)]_2xPhospho [T1(0); S6(0.8); T9(99.2); T17(95.7); T21(3.6); T22(0.7)]	Q8BWB1	Synpo2l	5	5	25.5978	25.2273	25.4125	0.483534	1.2928	1.2928	6Mo-KO_1Way up vs WT	-1.73205	2.89484	0.3705	Q8BWB1	TLPQVSPKTPPPMAPKTPPPTTPK	2xPhospho [T9(99.2); T17(95.7)]	2xPhospho [T1(0); S6(0.8); T9(99.2); T17(95.7); T21(3.6); T22(0.7)]	NP_001297361	0.000490528	0.000420153	Synpo2l	synaptopodin 2-like	68760	Synpo2l	14|14 A3	protein-coding	+1s	25.476	24.5968	24.9393	25.6994	27.2774	25.5016	25.8592	25.0311	25.0136	24.7309
1467	550	Q8R502_SQSLKSIPEK_2xPhospho [S3(100); S6(100)]_2xPhospho [S1(0); S3(100); S6(100)]	Q8R502	Lrrc8c	5	5	24.1434	23.9577	24.0506	0.483973	1.13738	1.13738	6Mo-KO_1Way up vs WT	-1.31755	1.70443	0.18572	Q8R502	SQSLKSIPEK	2xPhospho [S3(100); S6(100)]	2xPhospho [S1(0); S3(100); S6(100)]	NP_598658	0.00166762	0.000420153	Lrrc8c	leucine rich repeat containing 8 family, member C	100604	Lrrc8c	5|5 E5	protein-coding	+0.5s	24.3007	24.4486	24.4434	23.9493	23.5752	24.1256	23.4433	24.0762	23.6361	24.5074
1340	551	A2ASS6_MSPAMSPAR_2xPhospho [S2(100); S6(100)]_2xPhospho [S2(100); S6(100)]	A2ASS6	---	5	5	23.3525	23.6967	23.5246	0.485158	0.787723	-1.26948	6Mo-KO_1Way down vs WT	-2.69251	1.67072	-0.34424	A2ASS6	MSPAMSPAR	2xPhospho [S2(100); S6(100)]	2xPhospho [S2(100); S6(100)]	---	0.0447782	0.00237867	Ttn	titin	22138	Ttn	2 C3|2 45.13 cM	protein-coding	-0.5s	23.7814	24.2613	23.7555	22.8569	22.1072	24.0762	23.0974	24.0516	22.9895	24.2688
825	552	P97467_GKGSSGLNLGNFFASR_1xPhospho [S4(90)]_1xPhospho [S4(90); S5(10); S15(0)]	P97467	Pam	5	5	21.8492	22.1917	22.0205	0.485442	0.78863	-1.26802	6Mo-KO_1Way down vs WT	-2.68103	1.66743	-0.34258	P97467	GKGSSGLNLGNFFASR	1xPhospho [S4(90)]	1xPhospho [S4(90); S5(10); S15(0)]	NP_038654	0.00320593	0.000420153	Pam	peptidylglycine alpha-amidating monooxygenase	18484	Pam	1 D|1 47.76 cM	protein-coding	-0.5s	21.6088	21.9305	22.1236	22.4903	21.0926	21.3219	23.3051	22.455	22.6703	21.2064
650	553	P53986_EGKEDEASTDVDEKPK_1xPhospho [S8(91.4)]_1xPhospho [S8(91.4); T9(8.6)]	P53986	Slc16a1	5	5	22.575	22.2485	22.4118	0.485472	1.25398	1.25398	6Mo-KO_1Way up vs WT	-1.62802	2.56003	0.32652	P53986	EGKEDEASTDVDEKPK	1xPhospho [S8(91.4)]	1xPhospho [S8(91.4); T9(8.6)]	NP_033222	0.00230422	0.000420153	Slc16a1	solute carrier family 16 (monocarboxylic acid transporters), member 1	20501	Slc16a1	3|3 F2.2	protein-coding	+0.5s	22.7885	22.931	23.0054	22.7524	21.3976	21.8146	21.6148	22.3472	23.4889	21.9768
227	554	Q02248_TSMGGTQQQFVEGVR_1xPhospho [T1(91.1)]_1xPhospho [T1(91.1); S2(8.9); T6(0)]	Q02248	Ctnnb1	5	5	24.0145	23.7324	23.8734	0.486178	1.21591	1.21591	6Mo-KO_1Way up vs WT	-1.52502	2.25465	0.28204	Q02248	TSMGGTQQQFVEGVR	1xPhospho [T1(91.1)]	1xPhospho [T1(91.1); S2(8.9); T6(0)]	NP_001159374	0.112927	0.00543843	Ctnnb1	catenin (cadherin associated protein), beta 1	12387	Ctnnb1	9 F4|9 72.19 cM	protein-coding	+0.5s	23.5588	23.6483	23.7503	24.4959	24.619	22.9895	24.3288	23.5944	24.585	23.1644
940	555	A2ALU4_SRSSPSTDHYSQEVPVEPNR_2xPhospho [S1(88.9); S4(88.9)]_2xPhospho [S1(88.9); S3(22.1); S4(88.9); S6(0.1); T7(0); Y10(0); S11(0)]	A2ALU4	Shroom2	5	5	20.9761	21.3833	21.1797	0.487086	0.754085	-1.32611	6Mo-KO_1Way down vs WT	-3.24039	1.84263	-0.4072	A2ALU4	SRSSPSTDHYSQEVPVEPNR	2xPhospho [S1(88.9); S4(88.9)]	2xPhospho [S1(88.9); S3(22.1); S4(88.9); S6(0.1); T7(0); Y10(0); S11(0)]	NP_001277613	0.0187315	0.00109972	Shroom2	shroom family member 2	110380	Shroom2	X F3|X 68.46 cM	protein-coding	-1s	21.6818	21.7776	21.3479	21.0816	18.9917	21.9881	20.6592	21.258	21.299	21.7123
1032	556	E9PUK6_RSPTPPPR_2xPhospho [S2(100); T4(100)]_2xPhospho [S2(100); T4(100)]	E9PUK6	Srrm1	5	5	19.2731	20.2466	19.7599	0.48781	0.509269	-1.9636	6Mo-KO_1Way down vs WT	-16.6835	4.32696	-0.9735	E9PUK6	RSPTPPPR	2xPhospho [S2(100); T4(100)]	2xPhospho [S2(100); T4(100)]	NP_058079	0.00809589	0.000644898	Srrm1	serine/arginine repetitive matrix 1	51796	Srrm1	4|4 D3	protein-coding	-2s	20.7591	16.8159	18.3768	19.82	20.5936	19.748	21.9177	22.6253	20.6778	16.2641
367	557	Q9EQP2_ERSGGMDAVQTVTGGLR_1xPhospho [S3(100)]_1xPhospho [S3(100); T11(0); T13(0)]	Q9EQP2	Ehd4	5	5	19.8264	20.273	20.0497	0.4879	0.73375	-1.36286	6Mo-KO_1Way down vs WT	-3.6381	1.95871	-0.44664	Q9EQP2	ERSGGMDAVQTVTGGLR	1xPhospho [S3(100)]	1xPhospho [S3(100); T11(0); T13(0)]	NP_598599	0.00850286	0.000644898	Ehd4	EH-domain containing 4	98878	Ehd4	2|2 E5	protein-coding	-1s	18.5395	20.1594	19.7335	20.8709	19.8285	19.6186	21.1189	18.8655	21.5198	20.2422
976	558	Q9QUG9_AQSVSLEGSAPSPSPTHTHHR_2xPhospho [S9(80.8); S14(98.2)]_2xPhospho [S3(0.7); S5(3.1); S9(80.8); S12(15.6); S14(98.2); T16(0.8); T18(0.8)]	Q9QUG9	Rasgrp2	5	5	21.292	21.8241	21.5581	0.488719	0.691528	-1.44607	6Mo-KO_1Way down vs WT	-4.66908	2.23281	-0.53214	Q9QUG9	AQSVSLEGSAPSPSPTHTHHR	2xPhospho [S9(80.8); S14(98.2)]	2xPhospho [S3(0.7); S5(3.1); S9(80.8); S12(15.6); S14(98.2); T16(0.8); T18(0.8)]	NP_035372	0.0629335	0.00288454	Rasgrp2	RAS, guanyl releasing protein 2	19395	Rasgrp2	19|19 A	protein-coding	-1s	21.6737	22.3894	22.3416	20.6873	19.3678	22.1767	21.3609	20.726	21.4386	23.4183
26	559	Q6PGB9_STPSLVEPPDR_1xPhospho [S1(89)]_1xPhospho [S1(89); T2(11); S4(0)]	Q6PGB9	Akap6	5	5	21.9714	21.719	21.8452	0.489388	1.19119	1.19119	6Mo-KO_1Way up vs WT	-1.46503	2.07877	0.2524	Q6PGB9	STPSLVEPPDR	1xPhospho [S1(89)]	1xPhospho [S1(89); T2(11); S4(0)]	NP_932779	0.01294	0.00109972	Akap6	A kinase (PRKA) anchor protein 6	238161	Akap6	12|12 C1	protein-coding	+0.5s	21.6565	21.9949	21.5127	22.2137	22.4792	20.9513	21.9584	21.7183	22.6955	21.2715
1364	560	A2ASS6_MSPARMSPAR_1xOxidation [M]; 2xPhospho [S2(100); S7(100)]_1xOxidation [M1; M6]; 2xPhospho [S2(100); S7(100)]	A2ASS6	---	5	5	26.3406	26.531	26.4358	0.489786	0.876326	-1.14113	6Mo-KO_1Way down vs WT	-1.73776	1.33451	-0.19046	A2ASS6	MSPARMSPAR	1xOxidation [M]; 2xPhospho [S2(100); S7(100)]	1xOxidation [M1; M6]; 2xPhospho [S2(100); S7(100)]	---	0.066425	0.00288454	Ttn	titin	22138	Ttn	2 C3|2 45.13 cM	protein-coding	-0.5s	26.6138	25.9379	25.9749	26.16	27.0163	26.8668	26.54	26.9096	26.1091	26.2297
118	561	Q8K4L2_LPSPTVAR_1xPhospho [S/T]_1xPhospho [S3(50); T5(50)]	Q8K4L2	---	5	5	20.9525	20.7286	20.8406	0.490724	1.16784	1.16784	6Mo-KO_1Way up vs WT	-1.40528	1.91659	0.22384	Q8K4L2	LPSPTVAR	1xPhospho [S/T]	1xPhospho [S3(50); T5(50)]	---	0.123647	0.00595432	Svil	supervillin	225115	Svil	18|18 A1	protein-coding	+0.5s	20.4937	21.0844	20.5511	21.6489	20.9843	20.6238	20.8716	20.4004	21.5313	20.2161
141	562	Q8K019_SGSGSVGNGSSRYSPSQNSPIHHIPSR_2xDeamidated [N/Q]; 2xPhospho [S14(89.9); S19(93.5)]_2xDeamidated [N8; Q17; N18]; 2xPhospho [S1(1.5); S3(0.4); S5(0.4); S10(5.7); S11(1.5); Y13(0); S14(89.9); S16(6.4); S19(93.5); S26(0.5)]	Q8K019	Bclaf1	5	5	24.2623	23.9866	24.1244	0.490753	1.21065	1.21065	6Mo-KO_1Way up vs WT	-1.52079	2.22897	0.27578	Q8K019	SGSGSVGNGSSRYSPSQNSPIHHIPSR	2xDeamidated [N/Q]; 2xPhospho [S14(89.9); S19(93.5)]	2xDeamidated [N8; Q17; N18]; 2xPhospho [S1(1.5); S3(0.4); S5(0.4); S10(5.7); S11(1.5); Y13(0); S14(89.9); S16(6.4); S19(93.5); S26(0.5)]	NP_001020563	0.000152601	0.000420153	Bclaf1	BCL2-associated transcription factor 1	72567	Bclaf1	10|10 A3	protein-coding	+0.5s	24.3906	24.0339	24.1996	23.9256	24.762	24.3898	22.7073	24.4765	24.6081	23.7511
701	563	Q02566_GKLSYTQQMEDLKR_1xPhospho [S4(99.9)]_1xPhospho [S4(99.9); Y5(0); T6(0.1)]	Q02566	Myh6	5	5	20.969	20.7866	20.8778	0.491095	1.13482	1.13482	6Mo-KO_1Way up vs WT	-1.32009	1.70002	0.18246	Q02566	GKLSYTQQMEDLKR	1xPhospho [S4(99.9)]	1xPhospho [S4(99.9); Y5(0); T6(0.1)]	NP_001157643	0.0111725	0.000644898	Myh6	myosin, heavy polypeptide 6, cardiac muscle, alpha	17888	Myh6	14 C3|14 28.01 cM	protein-coding	+0.5s	20.5757	21.2882	20.9458	21.311	20.7245	20.5837	20.2422	21.1143	21.3913	20.6014
393	564	Q9CZV8_VHAYFAPVTPPPSVGGSR_2xPhospho [T9(100); S13(91)]_2xPhospho [Y4(0); T9(100); S13(91); S17(9)]	Q9CZV8	Fbxl20	5	5	23.1079	22.8967	23.0023	0.491199	1.15762	1.15762	6Mo-KO_1Way up vs WT	-1.37918	1.84822	0.21116	Q9CZV8	VHAYFAPVTPPPSVGGSR	2xPhospho [T9(100); S13(91)]	2xPhospho [Y4(0); T9(100); S13(91); S17(9)]	NP_082425	0.000340265	0.000420153	Fbxl20	F-box and leucine-rich repeat protein 20	72194	Fbxl20	11|11 D	protein-coding	+0.5s	23.0517	22.5761	22.7555	23.1221	24.0339	23.1519	23.2905	22.7848	22.8135	22.4428
1423	565	Q8K558_SSDSGLPSDIPHVR_1xPhospho [S2(86)]_1xPhospho [S1(13.6); S2(86); S4(0.4); S8(0)]	Q8K558	Treml1	5	5	23.3048	22.8357	23.0703	0.492168	1.38425	1.38425	6Mo-KO_1Way up vs WT	-2.04748	3.92324	0.4691	Q8K558	SSDSGLPSDIPHVR	1xPhospho [S2(86)]	1xPhospho [S1(13.6); S2(86); S4(0.4); S8(0)]	NP_001276380	0.00152196	0.000420153	Treml1	triggering receptor expressed on myeloid cells-like 1	71326	Treml1	17|17 C	protein-coding	+1s	23.4819	23.5005	23.1539	23.6105	22.7771	22.7877	24.47	21.5422	24.0387	21.3398
583	566	F6TFN2_SHSPSMSQSGSQLR_1xPhospho [S3(100)]_1xPhospho [S1(0); S3(100); S5(0); S7(0); S9(0); S11(0)]	F6TFN2	---	5	5	24.5432	24.3538	24.4485	0.492424	1.14029	1.14029	6Mo-KO_1Way up vs WT	-1.33588	1.73699	0.1894	F6TFN2	SHSPSMSQSGSQLR	1xPhospho [S3(100)]	1xPhospho [S1(0); S3(100); S5(0); S7(0); S9(0); S11(0)]	---	0.0101298	0.000644898	Lmo7	LIM domain only 7	380928	Lmo7	14 E2.3|14 50.9 cM	protein-coding	+0.5s	24.2795	24.4712	24.33	24.6288	25.0063	23.8383	24.4948	24.47	25.0796	23.8861
958	567	Q80Y56_DSLSTHTSPSQSPNSVHGSR_2xPhospho [S4(76.6); S12(98.3)]_2xPhospho [S2(0.8); S4(76.6); T5(15.7); T7(3.6); S8(3.6); S10(1.2); S12(98.3); S15(0.1); S19(0.1)]	Q80Y56	Rbsn	5	5	20.4222	20.7661	20.5941	0.493212	0.787919	-1.26917	6Mo-KO_1Way down vs WT	-2.72902	1.69422	-0.34388	Q80Y56	DSLSTHTSPSQSPNSVHGSR	2xPhospho [S4(76.6); S12(98.3)]	2xPhospho [S2(0.8); S4(76.6); T5(15.7); T7(3.6); S8(3.6); S10(1.2); S12(98.3); S15(0.1); S19(0.1)]	NP_084357	0.0157352	0.00109972	Rbsn	rabenosyn, RAB effector	78287	Rbsn	6|6 D1	protein-coding	-0.5s	21.0776	20.8103	20.7709	20.5043	18.9481	21.6511	19.842	20.9937	20.6702	20.6736
1323	568	A2ASS6_SLSRSPIRMSPAMSPAR_2xPhospho [S10(99.1); S]_2xPhospho [S1(2); S3(49); S5(49); S10(99.1); S14(0.9)]	A2ASS6	---	5	5	24.712	24.5272	24.6196	0.493471	1.13664	1.13664	6Mo-KO_1Way up vs WT	-1.32784	1.71551	0.18478	A2ASS6	SLSRSPIRMSPAMSPAR	2xPhospho [S10(99.1); S]	2xPhospho [S1(2); S3(49); S5(49); S10(99.1); S14(0.9)]	---	0.155478	0.00912834	Ttn	titin	22138	Ttn	2 C3|2 45.13 cM	protein-coding	+0.5s	24.9652	24.5215	24.3906	24.3124	25.3704	25.0562	24.5904	24.5957	24.09	24.3039
1387	569	A2ASS6_SLGDMSDEELLLPIDDYLAMK_2xOxidation [M5; M20]; 1xPhospho [S/Y]_2xOxidation [M5; M20]; 1xPhospho [S1(50); S6(50); Y17(0)]	A2ASS6	---	5	5	22.0281	21.5825	21.8053	0.493998	1.3619	1.3619	6Mo-KO_1Way up vs WT	-1.98391	3.6797	0.44562	A2ASS6	SLGDMSDEELLLPIDDYLAMK	2xOxidation [M5; M20]; 1xPhospho [S/Y]	2xOxidation [M5; M20]; 1xPhospho [S1(50); S6(50); Y17(0)]	---	0.00175174	0.000420153	Ttn	titin	22138	Ttn	2 C3|2 45.13 cM	protein-coding	+1s	21.6596	22.661	22.2186	22.4253	21.1761	20.1372	22.6755	23.0351	21.4055	20.6592
544	570	Q61029_LREQGTESRSSTPLPTVSSSAENTR_2xPhospho [T6(80.7); S/T]_2xPhospho [T6(80.7); S8(35.5); S10(28); S11(28); T12(28); T16(0); S18(0); S19(0); S20(0); T24(0)]	Q61029	Tmpo	5	5	24.1239	23.7869	23.9554	0.494443	1.26309	1.26309	6Mo-KO_1Way up vs WT	-1.68005	2.68035	0.33696	Q61029	LREQGTESRSSTPLPTVSSSAENTR	2xPhospho [T6(80.7); S/T]	2xPhospho [T6(80.7); S8(35.5); S10(28); S11(28); T12(28); T16(0); S18(0); S19(0); S20(0); T24(0)]	NP_001073598	0.0172288	0.00109972	Tmpo	thymopoietin	21917	Tmpo	10 C2|10 45.66 cM	protein-coding	+0.5s	24.5299	24.6632	24.4344	24.3048	22.6871	24.5333	22.9121	23.9216	23.3139	24.2537
409	571	P42128_SSGLQTPECLSREGSPIPHDPDLGSK_1xCarbamidomethyl [C9]; 2xPhospho [S11(97.7); S15(97)]_1xCarbamidomethyl [C9]; 2xPhospho [S1(1.5); S2(1.5); T6(2.2); S11(97.7); S15(97); S25(0.1)]	P42128	Foxk1	5	5	21.7713	21.5546	21.6629	0.494936	1.16207	1.16207	6Mo-KO_1Way up vs WT	-1.39686	1.88634	0.2167	P42128	SSGLQTPECLSREGSPIPHDPDLGSK	1xCarbamidomethyl [C9]; 2xPhospho [S11(97.7); S15(97)]	1xCarbamidomethyl [C9]; 2xPhospho [S1(1.5); S2(1.5); T6(2.2); S11(97.7); S15(97); S25(0.1)]	NP_951031	0.143241	0.00826345	Foxk1	forkhead box K1	17425	Foxk1	5 G2|5 81.53 cM	protein-coding	+0.5s	21.9397	21.3513	21.0926	21.8885	22.5843	21.7183	21.8312	21.8743	21.1387	21.2104
1275	572	E0CX53_LGSMDSFER_1xPhospho [S3(89.1)]_1xPhospho [S3(89.1); S6(10.9)]	E0CX53	---	5	5	20.3261	20.6208	20.4734	0.495242	0.815276	-1.22658	6Mo-KO_1Way down vs WT	-2.37115	1.57604	-0.29464	E0CX53	LGSMDSFER	1xPhospho [S3(89.1)]	1xPhospho [S3(89.1); S6(10.9)]	---	0.066425	0.00288454	Tbc1d4	TBC1 domain family, member 4	210789	Tbc1d4	14|14 E2.3	protein-coding	-0.5s	20.4053	19.9104	19.8771	21.0467	20.3911	20.2794	21.3673	20.7605	21.258	19.4386
530	573	Q9ET78_TSLSSLRSEHSNGTVAPDSPAADGPMLPSPPVPR_1xDeamidated [N12]; 2xPhospho [S/T]_1xDeamidated [N12]; 2xPhospho [T1(18.5); S2(60.4); S4(60.4); S5(60.4); S8(0.2); S11(0); T14(0); S19(0); S29(0)]	Q9ET78	Jph2	5	5	26.898	27.0339	26.9659	0.495723	0.910102	-1.09878	6Mo-KO_1Way down vs WT	-1.4897	1.2339	-0.1359	Q9ET78	TSLSSLRSEHSNGTVAPDSPAADGPMLPSPPVPR	1xDeamidated [N12]; 2xPhospho [S/T]	1xDeamidated [N12]; 2xPhospho [T1(18.5); S2(60.4); S4(60.4); S5(60.4); S8(0.2); S11(0); T14(0); S19(0); S29(0)]	NP_001192005	0.000241063	0.000420153	Jph2	junctophilin 2	59091	Jph2	2|2 H3	protein-coding	-0.5s	27.3217	27.041	26.6476	26.7182	26.7614	27.3247	26.5576	27.1391	27.2812	26.8668
859	574	O35930_RPSALSQGRGQDLLGTVGIR_2xPhospho [S3(100); S6(100)]_2xPhospho [S3(100); S6(100); T16(0)]	O35930	Gp1ba	5	5	23.4531	22.9799	23.2165	0.495916	1.3882	1.3882	6Mo-KO_1Way up vs WT	-2.07996	4.00832	0.47322	O35930	RPSALSQGRGQDLLGTVGIR	2xPhospho [S3(100); S6(100)]	2xPhospho [S3(100); S6(100); T16(0)]	NP_034456	0.0044912	0.000644898	Gp1ba	glycoprotein 1b, alpha polypeptide	14723	Gp1ba	11 B3|11 43.2 cM	protein-coding	+1s	24.3485	22.7133	22.7081	23.3165	24.1791	24.2132	24.3838	22.3576	22.4428	21.502
951	575	P35486_YGMGTSVER_1xPhospho [T/S/Y]_1xPhospho [Y1(0); T5(50); S6(50)]	P35486	Pdha1	5	5	27.4692	27.2592	27.3642	0.497761	1.15667	1.15667	6Mo-KO_1Way up vs WT	-1.38687	1.85547	0.20998	P35486	YGMGTSVER	1xPhospho [T/S/Y]	1xPhospho [Y1(0); T5(50); S6(50)]	NP_032836	0.00325129	0.000420153	Pdha1	pyruvate dehydrogenase E1 alpha 1	18597	Pdha1	X F4|X 73.95 cM	protein-coding	+0.5s	26.9051	27.7755	26.7182	28.0109	27.9362	26.9324	27.4944	27.0997	27.5292	27.2403
408	576	P42128_SLVSPIPSPTGTISVPNSCPASPR_1xCarbamidomethyl [C19]; 2xPhospho [S1(96.3); S22(100)]_1xCarbamidomethyl [C19]; 2xPhospho [S1(96.3); S4(3.7); S8(0); T10(0); T12(0); S14(0); S18(0); S22(100)]	P42128	Foxk1	5	5	20.3797	20.7368	20.5583	0.497864	0.780765	-1.2808	6Mo-KO_1Way down vs WT	-2.86123	1.74419	-0.35704	P42128	SLVSPIPSPTGTISVPNSCPASPR	1xCarbamidomethyl [C19]; 2xPhospho [S1(96.3); S22(100)]	1xCarbamidomethyl [C19]; 2xPhospho [S1(96.3); S4(3.7); S8(0); T10(0); T12(0); S14(0); S18(0); S22(100)]	NP_951031	0.0990755	0.00392242	Foxk1	forkhead box K1	17425	Foxk1	5 G2|5 81.53 cM	protein-coding	-0.5s	20.9258	19.5697	20.336	21.0552	20.0119	22.1724	20.2356	20.7827	20.8443	19.6488
1037	577	E9PUK6_SPSPAPPPPPPPPPPR_2xPhospho [S1(100); S3(100)]_2xPhospho [S1(100); S3(100)]	E9PUK6	Srrm1	5	5	21.0304	20.5023	20.7663	0.498253	1.44199	1.44199	6Mo-KO_1Way up vs WT	-2.27928	4.73938	0.52806	E9PUK6	SPSPAPPPPPPPPPPR	2xPhospho [S1(100); S3(100)]	2xPhospho [S1(100); S3(100)]	NP_058079	0.0030736	0.000420153	Srrm1	serine/arginine repetitive matrix 1	51796	Srrm1	4|4 D3	protein-coding	+1s	21.4089	20.7767	21.1025	19.9911	21.8728	21.5687	18.6131	21.141	19.1892	21.9997
1059	578	Q8BTI8_SRSPLAIR_2xPhospho [S1(100); S3(100)]_2xPhospho [S1(100); S3(100)]	Q8BTI8	Srrm2	5	5	23.4463	23.7627	23.6045	0.499834	0.803071	-1.24522	6Mo-KO_1Way down vs WT	-2.54714	1.64271	-0.3164	Q8BTI8	SRSPLAIR	2xPhospho [S1(100); S3(100)]	2xPhospho [S1(100); S3(100)]	NP_780438	0.0984258	0.00392242	Srrm2	serine/arginine repetitive matrix 2	75956	Srrm2	17|17 A3.3	protein-coding	-0.5s	24.0516	23.5453	24.3976	23.192	22.0451	24.3039	23.5764	23.8425	23.1768	23.914
209	579	P61014_ASTIEMPQQAR_1xOxidation [M6]; 2xPhospho [S2(100); T3(100)]_1xOxidation [M6]; 2xPhospho [S2(100); T3(100)]	P61014	Pln	5	5	22.6811	21.8443	22.2627	0.50111	1.78603	1.78603	6Mo-KO_1Way up vs WT	-3.7377	11.923	0.83676	P61014	ASTIEMPQQAR	1xOxidation [M6]; 2xPhospho [S2(100); T3(100)]	1xOxidation [M6]; 2xPhospho [S2(100); T3(100)]	NP_001135399	0.00119833	0.000420153	Pln	phospholamban	18821	Pln	10|10 B3	protein-coding	+2s	23.5353	23.5219	23.8488	22.4171	20.0824	23.3616	18.8148	22.7032	20.4161	23.926
289	580	P49586_MLQAISPKQSPSSSPTHER_2xPhospho [S6(98.6); S10(93.9)]_2xPhospho [S6(98.6); S10(93.9); S12(2.7); S13(2.5); S14(2.5); T16(0)]	P49586	Pcyt1a	5	5	20.6261	20.3475	20.4868	0.501183	1.21305	1.21305	6Mo-KO_1Way up vs WT	-1.5514	2.28288	0.27864	P49586	MLQAISPKQSPSSSPTHER	2xPhospho [S6(98.6); S10(93.9)]	2xPhospho [S6(98.6); S10(93.9); S12(2.7); S13(2.5); S14(2.5); T16(0)]	NP_001156631	0.075975	0.00360171	Pcyt1a	phosphate cytidylyltransferase 1, choline, alpha isoform	13026	Pcyt1a	16 B3|16 22.69 cM	protein-coding	+0.5s	21.0116	20.2718	20.3658	20.9058	20.5757	21.2395	19.0462	20.3486	20.2921	20.8111
1058	581	Q8BTI8_ARSRTPPSAPSQSR_2xPhospho [S3(100); T5(100)]_2xPhospho [S3(100); T5(100); S8(0); S11(0); S13(0)]	Q8BTI8	Srrm2	5	5	25.0892	25.2127	25.151	0.50129	0.917971	-1.08936	6Mo-KO_1Way down vs WT	-1.44176	1.21493	-0.12348	Q8BTI8	ARSRTPPSAPSQSR	2xPhospho [S3(100); T5(100)]	2xPhospho [S3(100); T5(100); S8(0); S11(0); S13(0)]	NP_780438	0.109308	0.00489296	Srrm2	serine/arginine repetitive matrix 2	75956	Srrm2	17|17 A3.3	protein-coding	-0.5s	25.4858	25.122	25.1943	24.762	24.8821	25.4284	25.0221	25.458	25.3184	24.8367
847	582	Q9CQ73_RPPGCGSFSDAVFDNGPLKPTMPTHPPGTSHSAGSLLEETTVR_1xCarbamidomethyl [C5]; 1xOxidation [M22]; 2xPhospho [S32(92.2); S35(94.4)]_1xCarbamidomethyl [C5]; 1xOxidation [M22]; 2xPhospho [S7(0); S9(0); T21(0.3); T24(0.3); T29(2.9); S30(6.5); S32(92.2); S35(94.4);¬'╓$b*	Q9CQ73	Pkp2	5	5	24.0973	23.6486	23.8729	0.502677	1.36481	1.36481	6Mo-KO_1Way up vs WT	-2.03574	3.79198	0.4487	Q9CQ73	RPPGCGSFSDAVFDNGPLKPTMPTHPPGTSHSAGSLLEETTVR	1xCarbamidomethyl [C5]; 1xOxidation [M22]; 2xPhospho [S32(92.2); S35(94.4)]	1xCarbamidomethyl [C5]; 1xOxidation [M22]; 2xPhospho [S7(0); S9(0); T21(0.3); T24(0.3); T29(2.9); S30(6.5); S32(92.2); S35(94.4);¬'╓$b*	NP_080439	0.0479495	0.00237867	Pkp2	plakophilin 2	67451	Pkp2	16|16 A2	protein-coding	+1s	23.1662	24.5416	24.3485	25.1757	23.2545	23.5508	22.2243	25.1636	23.004	24.3003
1054	583	Q8BTI8_SSTGPELPAPTPLLVEQHVDSPRPLAAIPSSQEPVNPSSEASPTR_2xPhospho [S/T]_2xPhospho [S1(1.4); S2(1.4); T3(2.7); T11(5.3); S21(54.1); S30(24); S31(11.1); S38(8); S39(17); S42(37.4); T44(37.4)]	Q8BTI8	Srrm2	5	5	24.9355	24.7362	24.8359	0.505076	1.14819	1.14819	6Mo-KO_1Way up vs WT	-1.37503	1.81275	0.19936	Q8BTI8	SSTGPELPAPTPLLVEQHVDSPRPLAAIPSSQEPVNPSSEASPTR	2xPhospho [S/T]	2xPhospho [S1(1.4); S2(1.4); T3(2.7); T11(5.3); S21(54.1); S30(24); S31(11.1); S38(8); S39(17); S42(37.4); T44(37.4)]	NP_780438	0.0435674	0.00237867	Srrm2	serine/arginine repetitive matrix 2	75956	Srrm2	17|17 A3.3	protein-coding	+0.5s	25.7511	24.5638	24.4297	24.6556	25.2774	24.4948	24.8956	24.6166	24.4765	25.1973
411	584	A2AQ43_TVSDNSLSSSK_2xPhospho [S3(99.9); S6(99.6)]_2xPhospho [T1(0.1); S3(99.9); S6(99.6); S8(0.4); S9(0); S10(0)]	A2AQ43	---	5	5	20.8065	20.0008	20.4036	0.505584	1.74802	1.74802	6Mo-KO_1Way up vs WT	-3.6306	11.0935	0.80572	A2AQ43	TVSDNSLSSSK	2xPhospho [S3(99.9); S6(99.6)]	2xPhospho [T1(0.1); S3(99.9); S6(99.6); S8(0.4); S9(0); S10(0)]	---	0.0897353	0.00360171	Fnbp1	formin binding protein 1	14269	Fnbp1	2|2 B	protein-coding	+2s	20.5571	21.8128	21.8508	18.7653	21.0467	21.1232	17.4937	22.112	17.6283	21.6469
1457	585	F6ZGN3_NKLEGDSDVDSELEDRVDGVK_2xPhospho [S7(100); S11(100)]_2xPhospho [S7(100); S11(100)]	F6ZGN3	---	5	5	23.1386	22.2031	22.6709	0.506474	1.91258	1.91258	6Mo-KO_1Way up vs WT	-4.48951	16.4225	0.93552	F6ZGN3	NKLEGDSDVDSELEDRVDGVK	2xPhospho [S7(100); S11(100)]	2xPhospho [S7(100); S11(100)]	---	0.0337758	0.00203657	Myo18a	myosin XVIIIA	360013	Myo18a	11|11 B5	protein-coding	+2s	22.4792	23.4328	23.9338	21.9986	23.8488	24.0473	18.2894	22.8526	20.3552	25.4711
1463	586	O08547_NLGSINTELQDVQR_1xPhospho [S4(100)]_1xPhospho [S4(100); T7(0)]	O08547	Sec22b	5	5	21.8247	22.1808	22.0027	0.506482	0.781263	-1.27998	6Mo-KO_1Way down vs WT	-2.9019	1.77124	-0.35612	O08547	NLGSINTELQDVQR	1xPhospho [S4(100)]	1xPhospho [S4(100); T7(0)]	NP_035472	0.000207959	0.000420153	Sec22b	SEC22 homolog B, vesicle trafficking protein	20333	Sec22b	3|3 F2.2	protein-coding	-0.5s	21.2146	21.4222	21.5282	22.696	22.2623	21.0622	22.0264	21.5269	22.9066	23.3818
135	587	Q9JLV1_SQSPAASDCSSSSSSASLPSSGR_1xCarbamidomethyl [C9]; 1xPhospho [S3(98.3)]_1xCarbamidomethyl [C9]; 1xPhospho [S1(1.7); S3(98.3); S7(0); S10(0); S11(0); S12(0); S13(0); S14(0); S15(0); S17(0); S20(0); S21(0)]	Q9JLV1	Bag3	5	5	23.9409	23.6663	23.8036	0.506888	1.20966	1.20966	6Mo-KO_1Way up vs WT	-1.55494	2.2753	0.2746	Q9JLV1	SQSPAASDCSSSSSSASLPSSGR	1xCarbamidomethyl [C9]; 1xPhospho [S3(98.3)]	1xCarbamidomethyl [C9]; 1xPhospho [S1(1.7); S3(98.3); S7(0); S10(0); S11(0); S12(0); S13(0); S14(0); S15(0); S17(0); S20(0); S21(0)]	NP_038891	1.84476e-07	0.000420153	Bag3	BCL2-associated athanogene 3	29810	Bag3	7|7 F3	protein-coding	+0.5s	23.0463	24.2541	24.0282	24.3194	24.0566	23.2976	23.2157	23.5071	24.9362	23.375
998	588	Q3UQS8_ARGSPEDGSHEASPLEGKASPPTESDLQSQACR_1xCarbamidomethyl [C32]; 2xPhospho [S4(100); S20(98.4)]_1xCarbamidomethyl [C32]; 2xPhospho [S4(100); S9(0); S13(0); S20(98.4); T23(0.3); S25(1.3); S29(0)]	Q3UQS8	Rbm20	5	5	24.538	24.3889	24.4635	0.508188	1.10891	1.10891	6Mo-KO_1Way up vs WT	-1.27231	1.56453	0.14914	Q3UQS8	ARGSPEDGSHEASPLEGKASPPTESDLQSQACR	1xCarbamidomethyl [C32]; 2xPhospho [S4(100); S20(98.4)]	1xCarbamidomethyl [C32]; 2xPhospho [S4(100); S9(0); S13(0); S20(98.4); T23(0.3); S25(1.3); S29(0)]	NP_001164318	0.000623048	0.000420153	Rbm20	RNA binding motif protein 20	73713	Rbm20	19|19 D2	protein-coding	+0.5s	24.8133	24.3194	24.5416	24.5299	24.4858	24.7507	23.6361	24.3476	24.6699	24.54
705	589	Q02566; Q91Z83; P13542_SDLSRELEEISER_1xPhospho [S4(100)]_1xPhospho [S1(0); S4(100); S11(0)]	Q02566; Q91Z83; P13542	---	5	5	22.8887	22.5909	22.7398	0.509166	1.22927	1.22927	6Mo-KO_1Way up vs WT	-1.62016	2.44823	0.2978	Q02566; Q91Z83; P13542	SDLSRELEEISER	1xPhospho [S4(100)]	1xPhospho [S1(0); S4(100); S11(0)]	---	0.00180169	0.000420153	Myh6	myosin, heavy polypeptide 6, cardiac muscle, alpha	17888	Myh6	14 C3|14 28.01 cM	protein-coding	+0.5s	22.4549	23.0776	22.7524	23.1036	23.0548	21.4259	23.109	22.3176	23.8496	22.2522
1483	590	E0CZD9_ASTPSAPAFYSQAPRPPPSPSRPEQHTVIHMGSTEALAHAPR_1xDeamidated [Q]; 2xPhospho [S2(89.3); T3(89.3)]_1xDeamidated [Q12; Q25]; 2xPhospho [S2(89.3); T3(89.3); S5(19.8); Y10(0.1); S11(0.6); S19(0.3); S21(0.3); T27(0.3); S33(0); T34(0)]	E0CZD9	---	5	5	22.1465	22.5082	22.3273	0.510253	0.778236	-1.28496	6Mo-KO_1Way down vs WT	-2.97356	1.80094	-0.36172	E0CZD9	ASTPSAPAFYSQAPRPPPSPSRPEQHTVIHMGSTEALAHAPR	1xDeamidated [Q]; 2xPhospho [S2(89.3); T3(89.3)]	1xDeamidated [Q12; Q25]; 2xPhospho [S2(89.3); T3(89.3); S5(19.8); Y10(0.1); S11(0.6); S19(0.3); S21(0.3); T27(0.3); S33(0); T34(0)]	---	0.0319607	0.00181132	Zfpl1	zinc finger like protein 1	81909	Zfpl1	19|19 A	protein-coding	-0.5s	22.4607	22.0415	21.5355	22.1409	22.5537	22.0877	24.4616	21.9137	22.2333	21.8446
789	591	A2APD7_SSPKEEVASEPEEAASPTTPK_2xPhospho [S9(100); S16(98.8)]_2xPhospho [S1(0); S2(0); S9(100); S16(98.8); T18(0.6); T19(0.6)]	A2APD7	---	5	5	22.6296	22.9911	22.8103	0.510439	0.778344	-1.28478	6Mo-KO_1Way down vs WT	-2.9729	1.80104	-0.36152	A2APD7	SSPKEEVASEPEEAASPTTPK	2xPhospho [S9(100); S16(98.8)]	2xPhospho [S1(0); S2(0); S9(100); S16(98.8); T18(0.6); T19(0.6)]	---	0.103058	0.00429411	Nop56	NOP56 ribonucleoprotein	67134	Nop56	2|2 F1	protein-coding	-0.5s	23.1539	23.1147	23.1704	22.447	21.2619	23.194	24.1602	22.7548	21.834	23.0125
1208	592	Q9Z2I9_INFDSNSAYR_1xPhospho [S5(90.1)]_1xPhospho [S5(90.1); S7(9.9); Y9(0)]	Q9Z2I9	Sucla2	5	5	22.6739	22.4585	22.5662	0.510581	1.16107	1.16107	6Mo-KO_1Way up vs WT	-1.42024	1.91462	0.21546	Q9Z2I9	INFDSNSAYR	1xPhospho [S5(90.1)]	1xPhospho [S5(90.1); S7(9.9); Y9(0)]	NP_035636	0.125251	0.00631624	Sucla2	succinate-Coenzyme A ligase, ADP-forming, beta subunit	20916	Sucla2	14|14 D3	protein-coding	+0.5s	22.1956	22.3981	22.3337	23.2545	23.1878	21.8369	22.7519	22.3034	23.1022	22.298
55	593	E9Q616_ISMPDIDLNLK_1xPhospho [S2(100)]_1xPhospho [S2(100)]	E9Q616	Ahnak	5	5	19.5713	19.9627	19.767	0.511673	0.762368	-1.3117	6Mo-KO_1Way down vs WT	-3.26234	1.89609	-0.39144	E9Q616	ISMPDIDLNLK	1xPhospho [S2(100)]	1xPhospho [S2(100)]	NP_033773	0.00689045	0.000644898	Ahnak	AHNAK nucleoprotein (desmoyokin)	66395	Ahnak	19|19 A	protein-coding	-1s	18.6935	19.3246	19.7175	20.3793	19.7415	18.8655	20.8563	19.9749	21.2715	18.8454
867	594	A0A0U1RPA0_SVDISLGGSPR_2xPhospho [S1(100); S]_2xPhospho [S1(100); S5(50); S9(50)]	A0A0U1RPA0	---	5	5	19.0823	19.8095	19.4459	0.511966	0.604067	-1.65545	6Mo-KO_1Way down vs WT	-9.00661	3.28648	-0.72722	A0A0U1RPA0	SVDISLGGSPR	2xPhospho [S1(100); S]	2xPhospho [S1(100); S5(50); S9(50)]	---	0.000631875	0.000420153	Plekha7	pleckstrin homology domain containing, family A member 7	233765	Plekha7	7|7 F1	protein-coding	-1s	20.7547	18.5572	18.7898	16.8159	20.4937	20.4428	17.1381	19.5871	19.9316	21.9478
1248	595	Q8CC35_AASPAKPSSLDLVPNLPR_1xPhospho [S3(100)]_1xPhospho [S3(100); S8(0); S9(0)]	Q8CC35	---	5	5	19.8641	20.1724	20.0182	0.512694	0.807626	-1.2382	6Mo-KO_1Way down vs WT	-2.54188	1.65797	-0.30824	Q8CC35	AASPAKPSSLDLVPNLPR	1xPhospho [S3(100)]	1xPhospho [S3(100); S8(0); S9(0)]	---	0.019127	0.00109972	Synpo	synaptopodin	104027	Synpo	18|18 D3- E1	protein-coding	-0.5s	19.1125	19.5993	18.9091	20.7987	20.901	19.5664	20.376	20.0945	20.5219	20.303
626	596	P14873_QSPDHPTLGASVLHITENGPTEVDYSPSDIQDSSLSHK_1xDeamidated [Q1]; 2xPhospho [T7(97.2); S11(77.1)]_1xDeamidated [Q1]; 2xPhospho [S2(25.1); T7(97.2); S11(77.1); T16(0.5); T21(0.1); Y25(0); S26(0.1); S28(0); S33(0); S34(0); S36(0)]	P14873	Map1b	5	5	21.1623	20.9704	21.0663	0.513961	1.1422	1.1422	6Mo-KO_1Way up vs WT	-1.37166	1.78951	0.19182	P14873	QSPDHPTLGASVLHITENGPTEVDYSPSDIQDSSLSHK	1xDeamidated [Q1]; 2xPhospho [T7(97.2); S11(77.1)]	1xDeamidated [Q1]; 2xPhospho [S2(25.1); T7(97.2); S11(77.1); T16(0.5); T21(0.1); Y25(0); S26(0.1); S28(0); S33(0); S34(0); S36(0)]	NP_032660	0.120495	0.00595432	Map1b	microtubule-associated protein 1B	17755	Map1b	13 D1|13 52.9 cM	protein-coding	+0.5s	21.452	21.7509	20.6315	21.5976	20.3793	20.8266	21.0076	20.9753	20.8871	21.1556
1455	597	E9PUR2_DGSAPPRSPQPATSPVPSETSQTAK_2xPhospho [S3(100); S8(98.6)]_2xPhospho [S3(100); S8(98.6); T13(0.7); S14(0.7); S18(0); T20(0); S21(0); T23(0)]	E9PUR2	---	5	5	23.2367	22.9785	23.1076	0.515465	1.19597	1.19597	6Mo-KO_1Way up vs WT	-1.53354	2.19348	0.25818	E9PUR2	DGSAPPRSPQPATSPVPSETSQTAK	2xPhospho [S3(100); S8(98.6)]	2xPhospho [S3(100); S8(98.6); T13(0.7); S14(0.7); S18(0); T20(0); S21(0); T23(0)]	---	0.120495	0.00595432	Myo18a	myosin XVIIIA	360013	Myo18a	11|11 B5	protein-coding	+0.5s	23.5495	23.7679	23.5353	23.0951	22.2358	23.8628	22.762	23.2795	22.4831	22.5053
473	598	A0A2R8W6L8_VKQEPPSPPHSPR_2xPhospho [S7(100); S11(100)]_2xPhospho [S7(100); S11(100)]	A0A2R8W6L8	---	5	5	24.242	23.7386	23.9903	0.515525	1.41751	1.41751	6Mo-KO_1Way up vs WT	-2.30204	4.62557	0.50336	A0A2R8W6L8	VKQEPPSPPHSPR	2xPhospho [S7(100); S11(100)]	2xPhospho [S7(100); S11(100)]	---	0.00228809	0.000420153	Hsf1	heat shock factor 1	15499	Hsf1	15 D3|15 35.95 cM	protein-coding	+1s	24.1666	25.4858	25.4858	23.879	22.1927	23.6244	22.7658	25.2916	23.6451	23.3662
1427	599	P58771_AISEELDHALNDMTSI_1xOxidation [M13]; 1xPhospho [S15(90.4)]_1xOxidation [M13]; 1xPhospho [S3(0); T14(9.6); S15(90.4)]	P58771	Tpm1	5	5	29.2643	28.9019	29.0831	0.516935	1.28556	1.28556	6Mo-KO_1Way up vs WT	-1.82805	3.02116	0.3624	P58771	AISEELDHALNDMTSI	1xOxidation [M13]; 1xPhospho [S15(90.4)]	1xOxidation [M13]; 1xPhospho [S3(0); T14(9.6); S15(90.4)]	NP_001157720	0.00098415	0.000420153	Tpm1	tropomyosin 1, alpha	22003	Tpm1	9 C|9 36.27 cM	protein-coding	+0.5s	28.9091	29.6804	29.4513	29.6804	28.6003	27.5839	28.6034	29.146	30.5728	28.6034
1186	600	Q8K4T3_VESLRPEKQSETSIHQYLVDESAISRPPPSAR_2xPhospho [S/T/Y]_2xPhospho [S3(23.2); S10(67.8); T12(52.4); S13(52.4); Y17(3.7); S22(0.4); S25(0.1); S30(0)]	Q8K4T3	Stradb	5	5	19.8834	20.2311	20.0572	0.516992	0.785847	-1.27251	6Mo-KO_1Way down vs WT	-2.88882	1.784	-0.34768	Q8K4T3	VESLRPEKQSETSIHQYLVDESAISRPPPSAR	2xPhospho [S/T/Y]	2xPhospho [S3(23.2); S10(67.8); T12(52.4); S13(52.4); Y17(3.7); S22(0.4); S25(0.1); S30(0)]	NP_766244	0.0734726	0.00329599	Stradb	STE20-related kinase adaptor beta	227154	Stradb	1 C1.3|1 29.2 cM	protein-coding	-0.5s	19.1599	20.6139	19.1125	19.4414	21.0892	19.4262	20.7096	20.589	20.9065	19.524
245	601	Q63918_SSPFKVSPLSFGR_1xPhospho [S7(99.5)]_1xPhospho [S1(0); S2(0); S7(99.5); S10(0.5)]	Q63918	Cavin2	5	5	23.1968	22.9242	23.0605	0.51727	1.20798	1.20798	6Mo-KO_1Way up vs WT	-1.57506	2.29837	0.2726	Q63918	SSPFKVSPLSFGR	1xPhospho [S7(99.5)]	1xPhospho [S1(0); S2(0); S7(99.5); S10(0.5)]	NP_620080	6.28959e-05	0.000420153	Cavin2	caveolae associated 2	20324	Cavin2	1|1 C1.1	protein-coding	+0.5s	22.6307	22.9205	22.6167	24.0218	23.7944	22.4471	23.4242	22.7172	23.6984	22.3342
1091	602	A0A0R4J243_RPASPSSPEHLPATPAESPAQR_2xPhospho [S6(87.9); S7(87.9)]_2xPhospho [S4(24.1); S6(87.9); S7(87.9); T14(0); S18(0)]	A0A0R4J243	Suds3	5	5	25.1258	25.027	25.0764	0.517291	1.07087	1.07087	6Mo-KO_1Way up vs WT	-1.17896	1.35198	0.09878	A0A0R4J243	RPASPSSPEHLPATPAESPAQR	2xPhospho [S6(87.9); S7(87.9)]	2xPhospho [S4(24.1); S6(87.9); S7(87.9); T14(0); S18(0)]	NP_001116138	8.69273e-05	0.000420153	Suds3	suppressor of defective silencing 3 homolog (S. cerevisiae)	71954	Suds3	5|5 F	protein-coding	+0.5s	25.4081	25.1495	25.1495	25.1495	24.7724	25.3855	25.0442	24.7379	25.0221	24.9454
1458	603	F6ZGN3_SSLSFSLSGSPSSR_1xPhospho [S10(99.2)]_1xPhospho [S1(0); S2(0); S4(0); S6(0); S8(0.8); S10(99.2); S12(0); S13(0)]	F6ZGN3	---	5	5	21.8518	21.5398	21.6958	0.517353	1.24139	1.24139	6Mo-KO_1Way up vs WT	-1.68209	2.5922	0.31196	F6ZGN3	SSLSFSLSGSPSSR	1xPhospho [S10(99.2)]	1xPhospho [S1(0); S2(0); S4(0); S6(0); S8(0.8); S10(99.2); S12(0); S13(0)]	---	0.0175929	0.00109972	Myo18a	myosin XVIIIA	360013	Myo18a	11|11 B5	protein-coding	+0.5s	20.934	21.7605	21.1411	22.8067	22.6167	21.2344	21.9228	21.3294	22.3472	20.8654
1310	604	Q569Z6_TDSEKPFRGSQSPKR_2xPhospho [S10(100); S12(100)]_2xPhospho [T1(0); S3(0); S10(100); S12(100)]	Q569Z6	Thrap3	5	5	24.2398	24.4302	24.335	0.517618	0.876326	-1.14113	6Mo-KO_1Way down vs WT	-1.7893	1.37409	-0.19046	Q569Z6	TDSEKPFRGSQSPKR	2xPhospho [S10(100); S12(100)]	2xPhospho [T1(0); S3(0); S10(100); S12(100)]	NP_666265	0.163448	0.00999264	Thrap3	thyroid hormone receptor associated protein 3	230753	Thrap3	4|4 D2.2	protein-coding	-0.5s	24.71	24.3601	24.619	23.7814	23.7284	24.9541	24.0152	24.8277	24.1754	24.1788
508	605	G3X9H5_SGSIVELLAGGGSSCSPVLSR_1xCarbamidomethyl [C15]; 2xPhospho [S1(88.4); S16(88.4)]_1xCarbamidomethyl [C15]; 2xPhospho [S1(88.4); S3(11.6); S13(0); S14(0); S16(88.4); S20(11.6)]	G3X9H5	Htt	5	5	22.8788	23.0438	22.9613	0.518913	0.891916	-1.12118	6Mo-KO_1Way down vs WT	-1.65757	1.31862	-0.16502	G3X9H5	SGSIVELLAGGGSSCSPVLSR	1xCarbamidomethyl [C15]; 2xPhospho [S1(88.4); S16(88.4)]	1xCarbamidomethyl [C15]; 2xPhospho [S1(88.4); S3(11.6); S13(0); S14(0); S16(88.4); S20(11.6)]	NP_034544	0.000102915	0.000420153	Htt	huntingtin	15194	Htt	5 B2|5 17.92 cM	protein-coding	-0.5s	23.571	22.2358	22.6527	22.8196	23.1147	23.0974	23.3783	22.9296	23.0259	22.7877
523	606	Q9ET80_VLEKPPSPKESPHFYR_2xPhospho [S7(100); S11(100)]_2xPhospho [S7(100); S11(100); Y15(0)]	Q9ET80	Jph1	5	5	27.1154	26.9298	27.0226	0.519748	1.13729	1.13729	6Mo-KO_1Way up vs WT	-1.36613	1.76699	0.1856	Q9ET80	VLEKPPSPKESPHFYR	2xPhospho [S7(100); S11(100)]	2xPhospho [S7(100); S11(100); Y15(0)]	NP_065629	1.67596e-05	0.000420153	Jph1	junctophilin 1	57339	Jph1	1|1 A3	protein-coding	+0.5s	27.1779	26.7842	26.6721	27.2002	27.7428	26.7909	27.3895	26.6541	27.408	26.4067
699	607	E9PV66_KLSSPTGLLSPTLRPR_2xPhospho [S3(100); S4(99.5)]_2xPhospho [S3(100); S4(99.5); T6(0.5); S10(0); T12(0)]	E9PV66	Myo18b	5	5	25.1476	25.7896	25.4686	0.519906	0.640824	-1.56049	6Mo-KO_1Way down vs WT	-7.16894	2.94396	-0.642	E9PV66	KLSSPTGLLSPTLRPR	2xPhospho [S3(100); S4(99.5)]	2xPhospho [S3(100); S4(99.5); T6(0.5); S10(0); T12(0)]	NP_083177	0.00272755	0.000420153	Myo18b	myosin XVIIIb	74376	Myo18b	5|5 F	protein-coding	-1s	24.4815	24.0566	24.135	25.6026	27.4624	25.7896	27.442	24.5482	23.908	27.2603
143	608	Q8K019_SGSGSVGNGSSRYSPSQNSPIHHIPSR_1xDeamidated [N]; 3xPhospho [S19(93); S/Y]_1xDeamidated [N8; N18]; 3xPhospho [S1(5); S3(18.1); S5(67.6); S10(53.8); S11(53.8); Y13(0.3); S14(1.5); S16(7); S19(93); S26(0)]	Q8K019	Bclaf1	5	5	20.9993	20.7001	20.8497	0.520071	1.23046	1.23046	6Mo-KO_1Way up vs WT	-1.6545	2.50498	0.2992	Q8K019	SGSGSVGNGSSRYSPSQNSPIHHIPSR	1xDeamidated [N]; 3xPhospho [S19(93); S/Y]	1xDeamidated [N8; N18]; 3xPhospho [S1(5); S3(18.1); S5(67.6); S10(53.8); S11(53.8); Y13(0.3); S14(1.5); S16(7); S19(93); S26(0)]	NP_001020563	0.000152601	0.000420153	Bclaf1	BCL2-associated transcription factor 1	72567	Bclaf1	10|10 A3	protein-coding	+0.5s	21.1231	20.9548	20.843	19.9781	22.0975	20.5634	21.6918	20.6888	19.8863	20.6702
438	609	P23242_VAAGHELQPLAIVDQRPSSRASSR_2xPhospho [S18(97.1); S19(97.1)]_2xPhospho [S18(97.1); S19(97.1); S22(3); S23(3)]	P23242	Gja1	5	5	26.5702	26.3586	26.4644	0.521139	1.15794	1.15794	6Mo-KO_1Way up vs WT	-1.42953	1.91674	0.21156	P23242	VAAGHELQPLAIVDQRPSSRASSR	2xPhospho [S18(97.1); S19(97.1)]	2xPhospho [S18(97.1); S19(97.1); S22(3); S23(3)]	NP_034418	0.00924846	0.000644898	Gja1	gap junction protein, alpha 1	14609	Gja1	10 B4|10 28.64 cM	protein-coding	+0.5s	26.6721	26.0593	26.2926	26.6721	27.1547	27.2603	26.4596	26.1788	25.7307	26.1636
1149	610	B2RXQ9_TSPGRADLPGSSSTFTK_1xPhospho [T/S]_1xPhospho [T1(50); S2(50); S11(0); S12(0); S13(0); T14(0); T16(0)]	B2RXQ9	Sorbs2	5	5	23.8511	23.6133	23.7322	0.521203	1.17918	1.17918	6Mo-KO_1Way up vs WT	-1.49439	2.07789	0.23778	B2RXQ9	TSPGRADLPGSSSTFTK	1xPhospho [T/S]	1xPhospho [T1(50); S2(50); S11(0); S12(0); S13(0); T14(0); T16(0)]	NP_001297636	0.00471742	0.000644898	Sorbs2	sorbin and SH3 domain containing 2	234214	Sorbs2	8|8 B1.1	protein-coding	+0.5s	23.5545	23.4373	23.1147	24.6464	24.5024	23.5634	24.0566	23.4433	23.9496	23.0535
297	611	F6WNT4_SASQSSLDKLDQELK_2xPhospho [S3(98.1); S6(99.7)]_2xPhospho [S1(1.9); S3(98.1); S5(0.3); S6(99.7)]	F6WNT4	---	5	5	24.5688	24.6962	24.6325	0.52203	0.915467	-1.09234	6Mo-KO_1Way down vs WT	-1.48073	1.24097	-0.12742	F6WNT4	SASQSSLDKLDQELK	2xPhospho [S3(98.1); S6(99.7)]	2xPhospho [S1(1.9); S3(98.1); S5(0.3); S6(99.7)]	---	0.00078031	0.000420153	Spag9	sperm associated antigen 9	70834	Spag9	11|11 D	protein-coding	-0.5s	24.4631	25.0242	24.9086	24.4486	23.9995	24.6699	24.8097	24.5129	24.7379	24.7507
443	612	P23242_MGQAGSTISNSHAQPFDFPDDSQNAKK_1xDeamidated [Q/N]; 1xOxidation [M1]; 2xPhospho [S6(99.2); S/T]_1xDeamidated [N10; Q14; Q23; N24]; 1xOxidation [M1]; 2xPhospho [S6(99.2); T7(2.7); S9(49.1); S11(49.1); S22(0)]	P23242	Gja1	5	5	23.4326	23.1049	23.2688	0.522367	1.25498	1.25498	6Mo-KO_1Way up vs WT	-1.74336	2.74573	0.32766	P23242	MGQAGSTISNSHAQPFDFPDDSQNAKK	1xDeamidated [Q/N]; 1xOxidation [M1]; 2xPhospho [S6(99.2); S/T]	1xDeamidated [N10; Q14; Q23; N24]; 1xOxidation [M1]; 2xPhospho [S6(99.2); T7(2.7); S9(49.1); S11(49.1); S22(0)]	NP_034418	0.00145909	0.000420153	Gja1	gap junction protein, alpha 1	14609	Gja1	10 B4|10 28.64 cM	protein-coding	+0.5s	23.8241	23.1069	23.5664	24.2795	22.386	23.156	22.0381	23.8174	22.5444	23.9687
1093	613	Q8CI08_NSPRPSPKQSPR_2xPhospho [S6(100); S10(100)]_2xPhospho [S2(0); S6(100); S10(100)]	Q8CI08	Slain2	5	5	23.4214	23.6827	23.5521	0.523077	0.834324	-1.19857	6Mo-KO_1Way down vs WT	-2.24038	1.55952	-0.26132	Q8CI08	NSPRPSPKQSPR	2xPhospho [S6(100); S10(100)]	2xPhospho [S2(0); S6(100); S10(100)]	NP_001106894	0.000753346	0.000420153	Slain2	SLAIN motif family, member 2	75991	Slain2	5|5 C3.2	protein-coding	-0.5s	24.0386	23.2102	23.677	23.2039	22.9772	24.09	23.6684	24.4948	23.7029	22.4574
256	614	Q63918_SLEETLHNVDLSSDDELPRDEEALEDSAEEKMEESR_1xOxidation [M32]; 2xPhospho [S13(77.5); S27(99.3)]_1xOxidation [M32]; 2xPhospho [S1(0); T5(0); S12(23.2); S13(77.5); S27(99.3); S35(0)]	Q63918	Cavin2	5	5	23.3361	22.9459	23.141	0.523162	1.31059	1.31059	6Mo-KO_1Way up vs WT	-1.9421	3.33585	0.39022	Q63918	SLEETLHNVDLSSDDELPRDEEALEDSAEEKMEESR	1xOxidation [M32]; 2xPhospho [S13(77.5); S27(99.3)]	1xOxidation [M32]; 2xPhospho [S1(0); T5(0); S12(23.2); S13(77.5); S27(99.3); S35(0)]	NP_620080	0.00351249	0.000420153	Cavin2	caveolae associated 2	20324	Cavin2	1|1 C1.1	protein-coding	+1s	22.8975	22.5702	23.9377	23.0054	24.2696	22.1279	24.1509	23.5557	23.375	21.5198
56	615	E9Q616_ISMPDLNLNLK_1xDeamidated [N7]; 1xPhospho [S2(100)]_1xDeamidated [N7]; 1xPhospho [S2(100)]	E9Q616	Ahnak	5	5	19.581	19.9592	19.7701	0.523431	0.769365	-1.29977	6Mo-KO_1Way down vs WT	-3.21687	1.90414	-0.37826	E9Q616	ISMPDLNLNLK	1xDeamidated [N7]; 1xPhospho [S2(100)]	1xDeamidated [N7]; 1xPhospho [S2(100)]	NP_033773	0.0157352	0.00109972	Ahnak	AHNAK nucleoprotein (desmoyokin)	66395	Ahnak	19|19 A	protein-coding	-0.5s	18.7185	19.3377	19.7244	20.3733	19.751	18.8454	20.8529	19.9644	21.268	18.8655
651	616	P59114_EGASLLSHSPGTSSQSQPCSPKPVR_1xCarbamidomethyl [C19]; 2xPhospho [S4(94.8); S20(100)]_1xCarbamidomethyl [C19]; 2xPhospho [S4(94.8); S7(1); S9(4.3); T12(0); S13(0); S14(0); S16(0); S20(100)]	P59114	Pcif1	5	5	22.985	22.7385	22.8618	0.523585	1.18631	1.18631	6Mo-KO_1Way up vs WT	-1.52178	2.14165	0.24648	P59114	EGASLLSHSPGTSSQSQPCSPKPVR	1xCarbamidomethyl [C19]; 2xPhospho [S4(94.8); S20(100)]	1xCarbamidomethyl [C19]; 2xPhospho [S4(94.8); S7(1); S9(4.3); T12(0); S13(0); S14(0); S16(0); S20(100)]	NP_666241	0.0915351	0.00378567	Pcif1	phosphorylated CTD interacting factor 1	228866	Pcif1	2|2 H3	protein-coding	+0.5s	23.1749	22.6573	22.5658	22.9396	23.5872	22.8818	23.5145	21.9955	23.3051	21.9955
606	617	A2AJI1_ARPSSPSTTWHRPASPCPSPGPGHALPPKPPSPR_1xCarbamidomethyl [C17]; 2xPhospho [S/T]_1xCarbamidomethyl [C17]; 2xPhospho [S4(38.5); S5(38.5); S7(22.3); T8(22.3); T9(22.3); S15(53.5); S19(2.6); S32(0)]	A2AJI1	Map7d1	5	5	23.6154	23.1516	23.3835	0.523659	1.37921	1.37921	6Mo-KO_1Way up vs WT	-2.2042	4.19286	0.46384	A2AJI1	ARPSSPSTTWHRPASPCPSPGPGHALPPKPPSPR	1xCarbamidomethyl [C17]; 2xPhospho [S/T]	1xCarbamidomethyl [C17]; 2xPhospho [S4(38.5); S5(38.5); S7(22.3); T8(22.3); T9(22.3); S15(53.5); S19(2.6); S32(0)]	NP_001139442	0.000891869	0.000420153	Map7d1	MAP7 domain containing 1	245877	Map7d1	4|4 D2.2	protein-coding	+1s	23.3733	22.5537	23.3165	23.4417	25.3919	22.6478	24.3386	24.0566	23.2157	21.4992
846	618	Q9CQ73_RPPGCGSFSDAVFDNGPLKPTMPTHPPGTSHSAGSLLEETTVR_1xCarbamidomethyl [C5]; 1xDeamidated [N15]; 1xOxidation [M22]; 2xPhospho [S35(88.7); T/S]_1xCarbamidomethyl [C5]; 1xDeamidated [N15]; 1xOxidation [M22]; 2xPhospho [S7(0); S9(0); T21(47.2); T24(47.2); T29(5¬'╓$b*	Q9CQ73	Pkp2	5	5	22.6731	23.5047	23.0889	0.523753	0.561898	-1.77968	6Mo-KO_1Way down vs WT	-13.0708	4.12682	-0.83162	Q9CQ73	RPPGCGSFSDAVFDNGPLKPTMPTHPPGTSHSAGSLLEETTVR	1xCarbamidomethyl [C5]; 1xDeamidated [N15]; 1xOxidation [M22]; 2xPhospho [S35(88.7); T/S]	1xCarbamidomethyl [C5]; 1xDeamidated [N15]; 1xOxidation [M22]; 2xPhospho [S7(0); S9(0); T21(47.2); T24(47.2); T29(5¬'╓$b*	NP_080439	0.0479495	0.00237867	Pkp2	plakophilin 2	67451	Pkp2	16|16 A2	protein-coding	-2s	25.3919	20.6933	22.4692	19.751	25.0602	22.7548	24.1349	22.3104	25.2304	23.0932
1064	619	Q8BTI8_SSSPVTELTARSPVKQDK_2xPhospho [S3(99.6); T/S]_2xPhospho [S1(0.1); S2(0.3); S3(99.6); T6(0.2); T9(49.9); S12(49.9)]	Q8BTI8	Srrm2	5	5	25.7168	25.5393	25.6281	0.524345	1.13088	1.13088	6Mo-KO_1Way up vs WT	-1.35401	1.73162	0.17744	Q8BTI8	SSSPVTELTARSPVKQDK	2xPhospho [S3(99.6); T/S]	2xPhospho [S1(0.1); S2(0.3); S3(99.6); T6(0.2); T9(49.9); S12(49.9)]	NP_780438	0.032856	0.00203657	Srrm2	serine/arginine repetitive matrix 2	75956	Srrm2	17|17 A3.3	protein-coding	+0.5s	26.1177	25.1125	25.3791	25.7983	26.1762	25.9033	25.9033	25.1085	25.5761	25.2054
1016	620	Q6NZC7_KLSVGAYVSSVR_1xPhospho [S3(100)]_1xPhospho [S3(100); Y7(0); S9(0); S10(0)]	Q6NZC7	---	5	5	21.2849	20.9292	21.1071	0.524854	1.27962	1.27962	6Mo-KO_1Way up vs WT	-1.83797	3.00955	0.35572	Q6NZC7	KLSVGAYVSSVR	1xPhospho [S3(100)]	1xPhospho [S3(100); Y7(0); S9(0); S10(0)]	---	0.00590521	0.000644898	Sec23ip	Sec23 interacting protein	207352	Sec23ip	7 F3|7 70.51 cM	protein-coding	+0.5s	20.5413	21.0892	21.0679	22.3646	21.3614	19.7142	21.2797	20.4161	22.3611	20.8747
433	621	P23242_VAAGHELQPLAIVDQRPSSR_1xPhospho [S]_1xPhospho [S18(50); S19(50)]	P23242	Gja1	5	5	22.9536	22.7626	22.8581	0.525269	1.1416	1.1416	6Mo-KO_1Way up vs WT	-1.38734	1.80806	0.19106	P23242	VAAGHELQPLAIVDQRPSSR	1xPhospho [S]	1xPhospho [S18(50); S19(50)]	NP_034418	0.00624608	0.000644898	Gja1	gap junction protein, alpha 1	14609	Gja1	10 B4|10 28.64 cM	protein-coding	+0.5s	22.8535	22.6058	22.3646	23.5588	23.3854	22.9718	23.0794	22.5209	23.0571	22.1836
1055	622	Q8BTI8_SGSSPEMKDKPR_2xPhospho [S3(98); S4(100)]_2xPhospho [S1(2); S3(98); S4(100)]	Q8BTI8	Srrm2	5	5	19.2199	19.9082	19.5641	0.525958	0.620602	-1.61134	6Mo-KO_1Way down vs WT	-8.4682	3.2615	-0.68826	Q8BTI8	SGSSPEMKDKPR	2xPhospho [S3(98); S4(100)]	2xPhospho [S1(2); S3(98); S4(100)]	NP_780438	0.0101298	0.000644898	Srrm2	serine/arginine repetitive matrix 2	75956	Srrm2	17|17 A3.3	protein-coding	-1s	20.166	18.7423	18.3535	18.8869	19.9508	19.4781	17.7965	22.6452	17.956	21.665
18	623	Q6PAM0_SHNDFVAILDLPEGEHQYK_1xPhospho [S1(100)]_1xPhospho [S1(100); Y18(0)]	Q6PAM0	Prkab2	5	5	22.6907	22.3539	22.5223	0.526365	1.26293	1.26293	6Mo-KO_1Way up vs WT	-1.78477	2.84672	0.33678	Q6PAM0	SHNDFVAILDLPEGEHQYK	1xPhospho [S1(100)]	1xPhospho [S1(100); Y18(0)]	NP_892042	0.000785817	0.000420153	Prkab2	protein kinase, AMP-activated, beta 2 non-catalytic subunit	108097	Prkab2	3|3 F2.2	protein-coding	+0.5s	22.2234	22.4954	22.8608	22.9694	22.9044	21.2178	23.1519	21.9057	23.8251	21.669
366	624	Q8BH64_SKYDEIFYNLAPADGKLSGSK_1xPhospho [S/Y]_1xPhospho [S1(0); Y3(0); Y8(0); S18(50); S20(50)]	Q8BH64	Ehd2	5	5	19.8593	20.1052	19.9823	0.527183	0.843325	-1.18578	6Mo-KO_1Way down vs WT	-2.14873	1.52817	-0.24584	Q8BH64	SKYDEIFYNLAPADGKLSGSK	1xPhospho [S/Y]	1xPhospho [S1(0); Y3(0); Y8(0); S18(50); S20(50)]	NP_694708	0.112927	0.00543843	Ehd2	EH-domain containing 2	259300	Ehd2	7 A2|7 8.65 cM	protein-coding	-0.5s	19.5815	19.9187	19.3678	20.57	19.8586	19.2042	20.9065	19.7847	20.6988	19.9316
986	625	E9PYT0_RTHSDASDDEAFTTSK_2xPhospho [S4(99.4); T13(82.2)]_2xPhospho [T2(0.1); S4(99.4); S7(2.8); T13(82.2); T14(13.3); S15(2.3)]	E9PYT0	Arhgap5	5	5	20.7662	20.2621	20.5142	0.527513	1.41824	1.41824	6Mo-KO_1Way up vs WT	-2.38827	4.80377	0.5041	E9PYT0	RTHSDASDDEAFTTSK	2xPhospho [S4(99.4); T13(82.2)]	2xPhospho [T2(0.1); S4(99.4); S7(2.8); T13(82.2); T14(13.3); S15(2.3)]	NP_033836	0.149722	0.00880964	Arhgap5	Rho GTPase activating protein 5	11855	Arhgap5	12 C1|12 22.16 cM	protein-coding	+1s	18.3768	20.9582	20.9174	21.0414	22.5372	19.8075	20.5313	20.5267	19.146	21.299
131	626	Q3TS02_TASFSESR_1xPhospho [S3(100)]_1xPhospho [T1(0); S3(100); S5(0); S7(0)]	Q3TS02	---	5	5	21.2885	20.9694	21.1289	0.527753	1.24757	1.24757	6Mo-KO_1Way up vs WT	-1.73598	2.70193	0.31912	Q3TS02	TASFSESR	1xPhospho [S3(100)]	1xPhospho [T1(0); S3(100); S5(0); S7(0)]	---	0.0538439	0.00252693	Acly	ATP citrate lyase	104112	Acly	11|11 D	protein-coding	+0.5s	20.9747	21.0024	21.5558	22.1793	20.7305	20.13	21.5344	21.1266	22.0917	19.9644
647	627	P53986_LKSKESLQEAGK_1xPhospho [S3(100)]_1xPhospho [S3(100); S6(0)]	P53986	Slc16a1	5	5	21.2118	20.9857	21.0987	0.528898	1.16967	1.16967	6Mo-KO_1Way up vs WT	-1.48047	2.02547	0.2261	P53986	LKSKESLQEAGK	1xPhospho [S3(100)]	1xPhospho [S3(100); S6(0)]	NP_033222	8.45154e-05	0.000420153	Slc16a1	solute carrier family 16 (monocarboxylic acid transporters), member 1	20501	Slc16a1	3|3 F2.2	protein-coding	+0.5s	20.8742	21.1967	21.2957	21.6265	21.0657	20.4535	20.8376	21.1232	22.1442	20.3698
181	628	P35564_AEEDEILNRSPR_1xPhospho [S10(100)]_1xPhospho [S10(100)]	P35564	Canx	5	5	26.6754	26.4517	26.5635	0.529213	1.16774	1.16774	6Mo-KO_1Way up vs WT	-1.47499	2.01133	0.22372	P35564	AEEDEILNRSPR	1xPhospho [S10(100)]	1xPhospho [S10(100)]	NP_001103969	0.000115988	0.000420153	Canx	calnexin	12330	Canx	11 B1.3|11 30.46 cM	protein-coding	+0.5s	26.1688	26.5975	26.4321	27.2187	26.9601	26.0149	26.9643	25.9812	27.3061	25.9921
1232	629	Q8BWB1_AGGAESGPEEDALSLGAEACNFMQPLGGR_1xCarbamidomethyl [C20]; 1xOxidation [M23]; 1xPhospho [S14(78.8)]_1xCarbamidomethyl [C20]; 1xOxidation [M23]; 1xPhospho [S6(21.2); S14(78.8)]	Q8BWB1	Synpo2l	5	5	20.8599	20.3352	20.5975	0.529251	1.43869	1.43869	6Mo-KO_1Way up vs WT	-2.48868	5.15118	0.52476	Q8BWB1	AGGAESGPEEDALSLGAEACNFMQPLGGR	1xCarbamidomethyl [C20]; 1xOxidation [M23]; 1xPhospho [S14(78.8)]	1xCarbamidomethyl [C20]; 1xOxidation [M23]; 1xPhospho [S6(21.2); S14(78.8)]	NP_001297361	0.0600224	0.00288454	Synpo2l	synaptopodin 2-like	68760	Synpo2l	14|14 A3	protein-coding	+1s	20.5202	20.8487	21.0185	21.9701	19.9421	18.3508	19.5003	20.6428	22.7391	20.4428
173	630	Q8R149_HDTPDTSPPR_2xPhospho [T3(100); S7(88.5)]_2xPhospho [T3(100); T6(11.6); S7(88.5)]	Q8R149	Bud13	5	5	20.9222	21.2939	21.108	0.529369	0.772882	-1.29386	6Mo-KO_1Way down vs WT	-3.1941	1.90798	-0.37168	Q8R149	HDTPDTSPPR	2xPhospho [T3(100); S7(88.5)]	2xPhospho [T3(100); T6(11.6); S7(88.5)]	NP_666112	0.100387	0.00392242	Bud13	BUD13 homolog	215051	Bud13	9|9 A5.2	protein-coding	-0.5s	21.7197	21.2146	21.6818	20.5873	19.4075	21.708	19.996	22.1017	21.0349	21.6287
1108	631	A0A0B4J1E2_GPPSPPAPVMHSPSRK_1xOxidation [M10]; 2xPhospho [S4(100); S12(99.5)]_1xOxidation [M10]; 2xPhospho [S4(100); S12(99.5); S14(0.5)]	A0A0B4J1E2	Snw1	5	5	21.5825	21.4213	21.5019	0.52942	1.11826	1.11826	6Mo-KO_1Way up vs WT	-1.32359	1.65517	0.16126	A0A0B4J1E2	GPPSPPAPVMHSPSRK	1xOxidation [M10]; 2xPhospho [S4(100); S12(99.5)]	1xOxidation [M10]; 2xPhospho [S4(100); S12(99.5); S14(0.5)]	NP_079783	6.62199e-06	0.000420153	Snw1	SNW domain containing 1	66354	Snw1	12|12 D2	protein-coding	+0.5s	21.8841	21.1231	21.2744	21.4901	22.1409	21.9623	21.134	21.0928	21.4432	21.474
507	632	A0A0R4J0C1_KPRTIYSSLQLQALNHR_1xDeamidated [N15]; 3xPhospho [T4(99.7); S7(81.3); S8(99.9)]_1xDeamidated [N15]; 3xPhospho [T4(99.7); Y6(19.1); S7(81.3); S8(99.9)]	A0A0R4J0C1	---	5	5	22.4054	21.9243	22.1649	0.530792	1.39573	1.39573	6Mo-KO_1Way up vs WT	-2.31697	4.5136	0.48102	A0A0R4J0C1	KPRTIYSSLQLQALNHR	1xDeamidated [N15]; 3xPhospho [T4(99.7); S7(81.3); S8(99.9)]	1xDeamidated [N15]; 3xPhospho [T4(99.7); Y6(19.1); S7(81.3); S8(99.9)]	---	0.137006	0.00761134	Dlx6	distal-less homeobox 6	13396	Dlx6	6 A1|6 2.83 cM	protein-coding	+1s	21.1933	22.5054	20.7931	24.753	22.782	22.0917	22.7125	21.4259	21.8532	21.5384
757	633	A0A0G2JEX1_KREDEEEEEGSIVNGSTTEDEEQTR_1xDeamidated [N14]; 2xPhospho [S11(99.7); T18(84.6)]_1xDeamidated [N14; Q23]; 2xPhospho [S11(99.7); S16(6.7); T17(6.9); T18(84.6); T24(2.1)]	A0A0G2JEX1	---	5	5	22.1384	21.3453	21.7418	0.531228	1.73275	1.73275	6Mo-KO_1Way up vs WT	-4.00462	12.0235	0.79306	A0A0G2JEX1	KREDEEEEEGSIVNGSTTEDEEQTR	1xDeamidated [N14]; 2xPhospho [S11(99.7); T18(84.6)]	1xDeamidated [N14; Q23]; 2xPhospho [S11(99.7); S16(6.7); T17(6.9); T18(84.6); T24(2.1)]	---	0.0261488	0.00132202	Nexn	nexilin	68810	Nexn	3|3 H3	protein-coding	+2s	21.8379	22.6654	22.502	20.3658	23.3208	23.4183	22.3472	17.956	19.5664	23.4387
283	634	Q9Z0X4_ISPVPSPSSSPPQGSPASSPVSNSASQQFPESPEVTIK_1xDeamidated [Q13]; 2xPhospho [S2(94.8); S/T]_1xDeamidated [Q13; Q28]; 2xPhospho [S2(94.8); S6(5.2); S8(4.3); S9(4.3); S10(11.4); S15(34); S18(34); S19(11.2); S22(0.5); S24(0.2); S26(0.1); S32(0); T36(0)]	Q9Z0X4	Pde3a	5	5	21.761	22.55	22.1555	0.532157	0.578745	-1.72788	6Mo-KO_1Way down vs WT	-11.9247	3.99414	-0.789	Q9Z0X4	ISPVPSPSSSPPQGSPASSPVSNSASQQFPESPEVTIK	1xDeamidated [Q13]; 2xPhospho [S2(94.8); S/T]	1xDeamidated [Q13; Q28]; 2xPhospho [S2(94.8); S6(5.2); S8(4.3); S9(4.3); S10(11.4); S15(34); S18(34); S19(11.2); S22(0.5); S24(0.2); S26(0.1); S32(0); T36(0)]	NP_061249	0.00978133	0.000644898	Pde3a	phosphodiesterase 3A, cGMP inhibited	54611	Pde3a	6|6 G2	protein-coding	-2s	23.0863	23.0906	17.2324	22.5761	22.8196	23.3382	23.0008	21.2178	23.2251	21.9681
1156	635	B2RXQ9_SFISSSPSSPSR_1xPhospho [S9(93.9)]_1xPhospho [S1(0); S4(0); S5(0); S6(0); S8(5.7); S9(93.9); S11(0.4)]	B2RXQ9	Sorbs2	5	5	25.4017	25.1447	25.2732	0.532613	1.19499	1.19499	6Mo-KO_1Way up vs WT	-1.57113	2.24358	0.257	B2RXQ9	SFISSSPSSPSR	1xPhospho [S9(93.9)]	1xPhospho [S1(0); S4(0); S5(0); S6(0); S8(5.7); S9(93.9); S11(0.4)]	NP_001297636	5.9454e-05	0.000420153	Sorbs2	sorbin and SH3 domain containing 2	234214	Sorbs2	8|8 B1.1	protein-coding	+0.5s	24.7822	25.4218	25.1757	26.0095	25.6192	24.6949	25.6718	24.5011	26.2023	24.6533
741	636	P70670_DAPTTLAESPSSPK_1xPhospho [S12(90.9)]_1xPhospho [T4(0); T5(0); S9(0.1); S11(9); S12(90.9)]	P70670	Naca	5	5	23.9414	23.7249	23.8331	0.533247	1.16196	1.16196	6Mo-KO_1Way up vs WT	-1.46455	1.97736	0.21656	P70670	DAPTTLAESPSSPK	1xPhospho [S12(90.9)]	1xPhospho [T4(0); T5(0); S9(0.1); S11(9); S12(90.9)]	NP_001106670	0.000796949	0.000420153	Naca	nascent polypeptide-associated complex alpha polypeptide	17938	Naca	10|10 D3	protein-coding	+0.5s	23.4523	24.0901	23.7021	24.2961	24.1666	23.4837	24.1187	23.5465	24.5957	22.8798
404	637	B7FAV1_RAPSVANIGSHCDLSLK_1xCarbamidomethyl [C12]; 2xPhospho [S4(100); S10(100)]_1xCarbamidomethyl [C12]; 2xPhospho [S4(100); S10(100); S15(0)]	B7FAV1	---	5	5	22.3895	22.0682	22.2289	0.533293	1.24944	1.24944	6Mo-KO_1Way up vs WT	-1.76146	2.74981	0.32128	B7FAV1	RAPSVANIGSHCDLSLK	1xCarbamidomethyl [C12]; 2xPhospho [S4(100); S10(100)]	1xCarbamidomethyl [C12]; 2xPhospho [S4(100); S10(100); S15(0)]	---	0.00146938	0.000420153	Flna	filamin, alpha	192176	Flna	X A7.3|X 37.89 cM	protein-coding	+0.5s	22.9044	22.7177	22.6058	21.5321	22.1875	21.9955	23.2568	21.0658	22.8009	21.2221
102	638	O54774_RHSSLPTESDEDIAPAQR_2xPhospho [S4(87); S9(100)]_2xPhospho [S3(13); S4(87); T7(0); S9(100)]	O54774	Ap3d1	5	5	22.146	22.3956	22.2708	0.533939	0.84113	-1.18888	6Mo-KO_1Way down vs WT	-2.19645	1.55399	-0.2496	O54774	RHSSLPTESDEDIAPAQR	2xPhospho [S4(87); S9(100)]	2xPhospho [S3(13); S4(87); T7(0); S9(100)]	NP_031486	0.00495501	0.000644898	Ap3d1	adaptor-related protein complex 3, delta 1 subunit	11776	Ap3d1	10 C1|10 39.72 cM	protein-coding	-0.5s	23.0225	22.1603	22.3827	22.2234	20.941	22.776	21.928	22.856	22.314	22.1039
215	639	E9QLJ0_RNSLESQDVLTNQEDGPSISESPVLNIENEK_1xPhospho [S3(99.9)]_1xPhospho [S3(99.9); S6(0.1); T11(0); S18(0); S20(0); S22(0)]	E9QLJ0	Cmya5	5	5	19.6591	20.337	19.998	0.534786	0.625048	-1.59988	6Mo-KO_1Way down vs WT	-8.5059	3.32313	-0.67796	E9QLJ0	RNSLESQDVLTNQEDGPSISESPVLNIENEK	1xPhospho [S3(99.9)]	1xPhospho [S3(99.9); S6(0.1); T11(0); S18(0); S20(0); S22(0)]	NP_076310	0.00624608	0.000644898	Cmya5	cardiomyopathy associated 5	76469	Cmya5	13|13 C3	protein-coding	-1s	19.9686	20.8362	20.4464	19.9993	17.0449	17.996	20.8046	19.0004	22.229	21.6552
1143	640	B2RXQ9_KPLSVSPSTDGLR_2xPhospho [S4(100); S6(86.5)]_2xPhospho [S4(100); S6(86.5); S8(6.8); T9(6.8)]	B2RXQ9	Sorbs2	5	5	22.9389	23.2189	23.0789	0.534838	0.823614	-1.21416	6Mo-KO_1Way down vs WT	-2.42082	1.64214	-0.27996	B2RXQ9	KPLSVSPSTDGLR	2xPhospho [S4(100); S6(86.5)]	2xPhospho [S4(100); S6(86.5); S8(6.8); T9(6.8)]	NP_001297636	0.0100591	0.000644898	Sorbs2	sorbin and SH3 domain containing 2	234214	Sorbs2	8|8 B1.1	protein-coding	-0.5s	23.2888	23.179	23.5005	23.0364	21.6899	23.7293	22.499	23.2735	22.6372	23.9554
1086	641	V9GWU7_NVTSTTEVSVQSGSEPLDK_1xDeamidated [Q11]; 2xPhospho [S12(79.7); T/S]_1xDeamidated [Q11]; 2xPhospho [T3(0.2); S4(1.5); T5(18.8); T6(74.6); S9(5.1); S12(79.7); S14(20.3)]	V9GWU7	---	5	5	22.2809	22.1545	22.2177	0.535514	1.09157	1.09157	6Mo-KO_1Way up vs WT	-1.25166	1.49137	0.1264	V9GWU7	NVTSTTEVSVQSGSEPLDK	1xDeamidated [Q11]; 2xPhospho [S12(79.7); T/S]	1xDeamidated [Q11]; 2xPhospho [T3(0.2); S4(1.5); T5(18.8); T6(74.6); S9(5.1); S12(79.7); S14(20.3)]	---	0.12606	0.00631624	Wnk3	WNK lysine deficient protein kinase 3	279561	Wnk3	X|X F3	protein-coding	+0.5s	22.3171	22.149	21.9204	22.0905	22.9273	22.2603	22.4094	21.8816	22.1613	22.0597
253	642	Q63918_LEDQMQEDREEGSFTEGLSEASLPSGLMEGSAEDAEK_1xPhospho [T/S]_1xPhospho [S13(15.5); T15(60.7); S19(15.5); S22(4.1); S25(4.1); S31(0)]	Q63918	Cavin2	5	5	22.438	22.7697	22.6039	0.535918	0.7946	-1.2585	6Mo-KO_1Way down vs WT	-2.85685	1.80378	-0.3317	Q63918	LEDQMQEDREEGSFTEGLSEASLPSGLMEGSAEDAEK	1xPhospho [T/S]	1xPhospho [S13(15.5); T15(60.7); S19(15.5); S22(4.1); S25(4.1); S31(0)]	NP_620080	0.0673262	0.00288454	Cavin2	caveolae associated 2	20324	Cavin2	1|1 C1.1	protein-coding	-0.5s	22.8401	23.2133	23.0179	21.6627	21.4561	22.0986	22.6302	22.9385	24.0634	22.1179
589	643	Q9JKS4_DPALDTNGSLATPSPSPEAR_2xPhospho [T12(100); S16(100)]_2xPhospho [T6(0); S9(0); T12(100); S14(0); S16(100)]	Q9JKS4	Ldb3	5	5	24.7936	25.2938	25.0437	0.536784	0.707028	-1.41437	6Mo-KO_1Way down vs WT	-4.88191	2.44041	-0.50016	Q9JKS4	DPALDTNGSLATPSPSPEAR	2xPhospho [T12(100); S16(100)]	2xPhospho [T6(0); S9(0); T12(100); S14(0); S16(100)]	NP_001034160	5.04453e-07	0.000420153	Ldb3	LIM domain binding 3	24131	Ldb3	14|14 B	protein-coding	-1s	25.4646	25.343	25.6994	24.7403	22.7207	26.0636	23.7879	25.9921	24.1308	26.4944
204	644	P61014_RASTIEMPQQAR_1xOxidation [M7]; 1xPhospho [S3(92)]_1xOxidation [M7]; 1xPhospho [S3(92); T4(8)]	P61014	Pln	5	5	26.7236	26.4203	26.572	0.537416	1.23396	1.23396	6Mo-KO_1Way up vs WT	-1.71981	2.61869	0.3033	P61014	RASTIEMPQQAR	1xOxidation [M7]; 1xPhospho [S3(92)]	1xOxidation [M7]; 1xPhospho [S3(92); T4(8)]	NP_001135399	0.00102657	0.000420153	Pln	phospholamban	18821	Pln	10|10 B3	protein-coding	+0.5s	25.9379	26.3641	26.3641	27.7155	27.2365	25.458	27.0217	26.316	27.3247	25.9812
615	645	Q8BGT6_KPSPSASPTVR_2xPhospho [S3(100); S7(99.5)]_2xPhospho [S3(100); S5(0.5); S7(99.5); T9(0)]	Q8BGT6	Micall1	5	5	23.6455	23.7957	23.7206	0.537462	0.901126	-1.10972	6Mo-KO_1Way down vs WT	-1.61088	1.30808	-0.1502	Q8BGT6	KPSPSASPTVR	2xPhospho [S3(100); S7(99.5)]	2xPhospho [S3(100); S5(0.5); S7(99.5); T9(0)]	NP_803412	8.75409e-05	0.000420153	Micall1	microtubule associated monooxygenase, calponin and LIM domain containing -like 1	27008	Micall1	15 E1|15 37.7 cM	protein-coding	-0.5s	23.946	23.7814	23.842	23.3542	23.3037	24.1509	23.294	24.3117	23.4976	23.7241
1291	646	A0A087WQ94_HLGGSGSVVPGSPSLDR_1xPhospho [S12(87.6)]_1xPhospho [S5(0); S7(0); S12(87.6); S14(12.4)]	A0A087WQ94	---	5	5	22.1618	21.7978	21.9798	0.537522	1.28701	1.28701	6Mo-KO_1Way up vs WT	-1.91746	3.17606	0.36402	A0A087WQ94	HLGGSGSVVPGSPSLDR	1xPhospho [S12(87.6)]	1xPhospho [S5(0); S7(0); S12(87.6); S14(12.4)]	---	2.96966e-06	0.000420153	Tns1	tensin 1	21961	Tns1	1 C3|1 38.17 cM	protein-coding	+0.5s	22.1409	21.9789	21.8756	23.0699	21.7438	21.4481	21.6045	21.9381	23.5822	20.4161
1296	647	Q8CGB6_GYPSPGAHSPR_1xPhospho [S9(100)]_1xPhospho [Y2(0); S4(0); S9(100)]	Q8CGB6	Tns2	5	5	21.4668	21.2902	21.3785	0.537691	1.13025	1.13025	6Mo-KO_1Way up vs WT	-1.37175	1.75235	0.17664	Q8CGB6	GYPSPGAHSPR	1xPhospho [S9(100)]	1xPhospho [Y2(0); S4(0); S9(100)]	NP_705761	0.110743	0.00528354	Tns2	tensin 2	209039	Tns2	15 F2|15 57.29 cM	protein-coding	+0.5s	21.1761	21.6088	21.1387	21.8977	21.5127	20.7382	21.1999	21.4992	22.079	20.9345
657	648	V9GWW6_HGLLISPTTSEQLAHKPPAFSFVSPTNQK_2xPhospho [S6(98); S24(94)]_2xPhospho [S6(98); T8(1.5); T9(0.4); S10(0); S21(0.4); S24(94); T26(5.6)]	V9GWW6	---	5	5	21.2544	20.7408	20.9976	0.538398	1.42759	1.42759	6Mo-KO_1Way up vs WT	-2.51253	5.12056	0.51358	V9GWW6	HGLLISPTTSEQLAHKPPAFSFVSPTNQK	2xPhospho [S6(98); S24(94)]	2xPhospho [S6(98); T8(1.5); T9(0.4); S10(0); S21(0.4); S24(94); T26(5.6)]	---	0.00461911	0.000644898	Mlip	muscular LMNA-interacting protein	69642	Mlip	9|9 D	protein-coding	+1s	21.1893	23.0588	19.5039	21.3265	21.1933	19.9548	21.9657	19.4781	22.2449	20.0604
1437	649	Q7TQD2_AANKTPPKSPGDPAR_2xPhospho [T5(100); S9(100)]_2xPhospho [T5(100); S9(100)]	Q7TQD2	Tppp	5	5	26.1453	26.2736	26.2095	0.539341	0.914871	-1.09305	6Mo-KO_1Way down vs WT	-1.50526	1.25989	-0.12836	Q7TQD2	AANKTPPKSPGDPAR	2xPhospho [T5(100); S9(100)]	2xPhospho [T5(100); S9(100)]	NP_878259	0.000167214	0.000420153	Tppp	tubulin polymerization promoting protein	72948	Tppp	13|13 C1	protein-coding	-0.5s	26.3834	25.9989	26.16	25.7657	26.4183	26.2978	26.3883	26.7003	26.2637	25.718
4	650	Q8VDP3_VSPVPSPSQPAR_1xPhospho [S2(100)]_1xPhospho [S2(100); S6(0); S8(0)]	Q8VDP3	Mical1	5	5	20.5357	20.2924	20.414	0.53975	1.1837	1.1837	6Mo-KO_1Way up vs WT	-1.55041	2.17233	0.2433	Q8VDP3	VSPVPSPSQPAR	1xPhospho [S2(100)]	1xPhospho [S2(100); S6(0); S8(0)]	NP_001157905	0.0734726	0.00329599	Mical1	microtubule associated monooxygenase, calponin and LIM domain containing 1	171580	Mical1	10|10 B1	protein-coding	+0.5s	19.7803	20.737	20.1746	20.9933	20.9933	19.6712	20.5837	19.6186	21.1796	20.4089
391	651	Q6PDJ6_HPPEQTNGVHTPPHVASALAGAVSPGALR_1xDeamidated [Q5]; 2xPhospho [T11(94.4); S24(100)]_1xDeamidated [Q5]; 2xPhospho [T6(5.6); T11(94.4); S17(0); S24(100)]	Q6PDJ6	Fbxo42	5	5	22.2751	22.0981	22.1866	0.539806	1.13058	1.13058	6Mo-KO_1Way up vs WT	-1.37601	1.75883	0.17706	Q6PDJ6	HPPEQTNGVHTPPHVASALAGAVSPGALR	1xDeamidated [Q5]; 2xPhospho [T11(94.4); S24(100)]	1xDeamidated [Q5]; 2xPhospho [T6(5.6); T11(94.4); S17(0); S24(100)]	NP_766106	0.111467	0.00528354	Fbxo42	F-box protein 42	213499	Fbxo42	4|4 D3	protein-coding	+0.5s	22.6871	22.5407	21.5206	21.9789	22.6483	22.5254	22.2333	22.2603	21.7695	21.7018
948	652	Q8R4E6_HSAPSPPVSVGSEEHPHSVLK_3xPhospho [S5(100); S9(100); S12(100)]_3xPhospho [S2(0); S5(100); S9(100); S12(100); S18(0)]	Q8R4E6	Purg	5	5	22.8104	22.3505	22.5804	0.54161	1.3755	1.3755	6Mo-KO_1Way up vs WT	-2.30351	4.35826	0.45996	Q8R4E6	HSAPSPPVSVGSEEHPHSVLK	3xPhospho [S5(100); S9(100); S12(100)]	3xPhospho [S2(0); S5(100); S9(100); S12(100); S18(0)]	NP_001091703	0.0087445	0.000644898	Purg	purine-rich element binding protein G	75029	Purg	8|8 A3	protein-coding	+1s	22.8196	22.5372	23.033	22.2826	23.3798	23.6631	20.1132	23.0388	21.3609	23.5764
1118	653	A0A286YD34_SATVSPQPSHHSLSAGPDLTESEK_3xPhospho [S1(84.9); S5(84.9); S12(82.1)]_3xPhospho [S1(84.9); T3(30.2); S5(84.9); S9(17.9); S12(82.1); S14(0); T20(0); S22(0)]	A0A286YD34	---	5	5	21.4015	21.0316	21.2166	0.541775	1.29228	1.29228	6Mo-KO_1Way up vs WT	-1.95713	3.26838	0.36992	A0A286YD34	SATVSPQPSHHSLSAGPDLTESEK	3xPhospho [S1(84.9); S5(84.9); S12(82.1)]	3xPhospho [S1(84.9); T3(30.2); S5(84.9); S9(17.9); S12(82.1); S14(0); T20(0); S22(0)]	---	0.00268948	0.000420153	Sorbs1	sorbin and SH3 domain containing 1	20411	Sorbs1	19 C3|19 34.25 cM	protein-coding	+1s	22.1072	21.7468	22.1033	21.0657	19.9845	21.0119	19.7779	20.8046	21.1652	22.3983
1189	654	A0A087WSE3_AASVELPQR_1xPhospho [S3(100)]_1xPhospho [S3(100)]	A0A087WSE3	---	5	5	21.1233	20.7816	20.9524	0.542644	1.2672	1.2672	6Mo-KO_1Way up vs WT	-1.86271	2.99112	0.34164	A0A087WSE3	AASVELPQR	1xPhospho [S3(100)]	1xPhospho [S3(100)]	---	0.0395744	0.00237867	Speg	SPEG complex locus	11790	Speg	1 C4|1 38.88 cM	protein-coding	+0.5s	21.3403	21.5239	20.8304	21.8219	20.0998	20.5313	20.2232	20.051	22.5136	20.589
981	655	A3KGH6_SHSLPNSLDYAQASER_1xPhospho [S3(99.9)]_1xPhospho [S1(0.1); S3(99.9); S7(0); Y10(0); S14(0)]	A3KGH6	---	5	5	22.2499	22.0474	22.1486	0.542682	1.15067	1.15067	6Mo-KO_1Way up vs WT	-1.44587	1.91441	0.20248	A3KGH6	SHSLPNSLDYAQASER	1xPhospho [S3(99.9)]	1xPhospho [S1(0.1); S3(99.9); S7(0); Y10(0); S14(0)]	---	0.000340265	0.000420153	Rmdn3	regulator of microtubule dynamics 3	67809	Rmdn3	2|2 E5	protein-coding	+0.5s	22.0865	22.2623	21.9158	22.3468	22.6379	21.299	22.4318	21.5801	22.9418	21.9842
274	656	A2AMM0_GGYSPQEGGDPPTPEPLK_2xPhospho [S4(100); T13(100)]_2xPhospho [Y3(0); S4(100); T13(100)]	A2AMM0	Cavin4	5	5	21.6383	22.1868	21.9125	0.542798	0.683731	-1.46256	6Mo-KO_1Way down vs WT	-5.81006	2.71613	-0.5485	A2AMM0	GGYSPQEGGDPPTPEPLK	2xPhospho [S4(100); T13(100)]	2xPhospho [Y3(0); S4(100); T13(100)]	NP_080785	0.0140719	0.00109972	Cavin4	caveolae associated 4	68016	Cavin4	4|4 B1	protein-coding	-1s	22.3135	22.4426	22.6435	22.0736	18.7185	22.871	21.1512	22.3947	21.1467	23.3706
1351	657	A2ASS6_RRTPSPDYDLYYYR_2xPhospho [T3(100); S5(100)]_2xPhospho [T3(100); S5(100); Y8(0); Y11(0); Y12(0); Y13(0)]	A2ASS6	---	5	5	32.791	32.9158	32.8534	0.543235	0.917131	-1.09036	6Mo-KO_1Way down vs WT	-1.49288	1.25571	-0.1248	A2ASS6	RRTPSPDYDLYYYR	2xPhospho [T3(100); S5(100)]	2xPhospho [T3(100); S5(100); Y8(0); Y11(0); Y12(0); Y13(0)]	---	0.00143872	0.000420153	Ttn	titin	22138	Ttn	2 C3|2 45.13 cM	protein-coding	-0.5s	32.4176	32.4176	33.0399	33.0399	33.0399	33.0399	33.0399	33.0399	32.4193	33.0399
218	658	P26231_SRTSVQTEDDQLIAGQSAR_2xPhospho [T3(98.7); S4(98.7)]_2xPhospho [S1(2.6); T3(98.7); S4(98.7); T7(0); S17(0)]	P26231	Ctnna1	5	5	24.0431	24.4739	24.2585	0.543504	0.741871	-1.34794	6Mo-KO_1Way down vs WT	-3.99014	2.19606	-0.43076	P26231	SRTSVQTEDDQLIAGQSAR	2xPhospho [T3(98.7); S4(98.7)]	2xPhospho [S1(2.6); T3(98.7); S4(98.7); T7(0); S17(0)]	NP_033948	3.04752e-05	0.000420153	Ctnna1	catenin (cadherin associated protein), alpha 1	12385	Ctnna1	18 B1|18 18.89 cM	protein-coding	-1s	24.637	24.8499	24.8133	24.33	21.5854	24.8277	23.5676	24.5904	24.2201	25.1636
33	659	E9Q9C4_STSQGSINSPVYSR_1xPhospho [S3(99.6)]_1xPhospho [S1(0.2); T2(0.2); S3(99.6); S6(0); S9(0); Y12(0); S13(0)]	E9Q9C4	---	5	5	25.4081	25.1339	25.271	0.543584	1.20934	1.20934	6Mo-KO_1Way up vs WT	-1.65025	2.4135	0.27422	E9Q9C4	STSQGSINSPVYSR	1xPhospho [S3(99.6)]	1xPhospho [S1(0.2); T2(0.2); S3(99.6); S6(0); S9(0); Y12(0); S13(0)]	---	0.000438318	0.000420153	Ablim1	actin-binding LIM protein 1	226251	Ablim1	19 D2|19 52.09 cM	protein-coding	+0.5s	24.84	25.5834	25.1372	25.9103	25.5696	24.5689	25.9921	24.677	26.1524	24.279
264	660	Q63918_YESGYMLNSEEMEEPSEK_1xPhospho [S3(85.5)]_1xPhospho [Y1(12.5); S3(85.5); Y5(0.1); S9(2); S16(0)]	Q63918	Cavin2	5	5	20.2585	20.534	20.3962	0.543889	0.826164	-1.21041	6Mo-KO_1Way down vs WT	-2.42475	1.65501	-0.2755	Q63918	YESGYMLNSEEMEEPSEK	1xPhospho [S3(85.5)]	1xPhospho [Y1(12.5); S3(85.5); Y5(0.1); S9(2); S16(0)]	NP_620080	0.0028053	0.000420153	Cavin2	caveolae associated 2	20324	Cavin2	1|1 C1.1	protein-coding	-0.5s	20.2327	19.7244	19.9508	20.7082	20.6765	19.2403	20.9638	20.2161	21.5511	20.6988
595	661	P19973_HQVRTPSPLALEDTVELSSPPLSPTTK_2xPhospho [T5(100); S7(100)]_2xPhospho [T5(100); S7(100); T14(0); S18(0); S19(0); S23(0); T25(0); T26(0)]	P19973	Lsp1	5	5	24.5892	24.4671	24.5282	0.544284	1.08827	1.08827	6Mo-KO_1Way up vs WT	-1.25042	1.48092	0.12204	P19973	HQVRTPSPLALEDTVELSSPPLSPTTK	2xPhospho [T5(100); S7(100)]	2xPhospho [T5(100); S7(100); T14(0); S18(0); S19(0); S23(0); T25(0); T26(0)]	NP_001129543	0.0337758	0.00203657	Lsp1	lymphocyte specific 1	16985	Lsp1	7 F5|7 87.93 cM	protein-coding	+0.5s	24.7472	24.4213	24.2138	24.5782	24.9853	24.8787	24.4765	24.2745	24.6351	24.0708
938	662	D3Z1M8_ATSPSSSVSGDFDDGHHSVPTPGPSR_2xPhospho [T/S]_2xPhospho [T2(74); S3(35.9); S5(29.4); S6(15.6); S7(34.7); S9(10.4); S18(0); T21(0); S25(0)]	D3Z1M8	---	5	5	20.7561	20.2852	20.5206	0.544823	1.38597	1.38597	6Mo-KO_1Way up vs WT	-2.37254	4.55746	0.4709	D3Z1M8	ATSPSSSVSGDFDDGHHSVPTPGPSR	2xPhospho [T/S]	2xPhospho [T2(74); S3(35.9); S5(29.4); S6(15.6); S7(34.7); S9(10.4); S18(0); T21(0); S25(0)]	---	0.0946096	0.00392242	Pbrm1	polybromo 1	66923	Pbrm1	14|14 B	protein-coding	+1s	21.1692	20.6375	21.333	20.8524	19.7885	20.9264	17.5625	20.5431	21.0028	21.3913
1203	663	A0A087WSE3_SSGPSLAGTVESRPQTPLSEASGR_2xPhospho [T16(99.4); S19(99.9)]_2xPhospho [S1(0); S2(0); S5(0); T9(0); S12(0.6); T16(99.4); S19(99.9); S22(0.1)]	A0A087WSE3	---	5	5	23.7296	23.9094	23.8195	0.546304	0.882825	-1.13273	6Mo-KO_1Way down vs WT	-1.78756	1.39319	-0.1798	A0A087WSE3	SSGPSLAGTVESRPQTPLSEASGR	2xPhospho [T16(99.4); S19(99.9)]	2xPhospho [S1(0); S2(0); S5(0); T9(0); S12(0.6); T16(99.4); S19(99.9); S22(0.1)]	---	0.00760102	0.000644898	Speg	SPEG complex locus	11790	Speg	1 C4|1 38.88 cM	protein-coding	-0.5s	23.7679	23.9073	23.9858	23.8166	23.1704	24.1187	23.523	24.1509	23.1855	24.5689
149	664	Q8K019_YSPSQNSPIHHIPSRR_2xPhospho [S2(92.6); S14(100)]_2xPhospho [Y1(3.4); S2(92.6); S4(3.4); S7(0.7); S14(100)]	Q8K019	Bclaf1	5	5	22.3254	22.0463	22.1858	0.546641	1.2134	1.2134	6Mo-KO_1Way up vs WT	-1.67409	2.46484	0.27906	Q8K019	YSPSQNSPIHHIPSRR	2xPhospho [S2(92.6); S14(100)]	2xPhospho [Y1(3.4); S2(92.6); S4(3.4); S7(0.7); S14(100)]	NP_001020563	0.0216791	0.00109972	Bclaf1	BCL2-associated transcription factor 1	72567	Bclaf1	10|10 A3	protein-coding	+0.5s	22.91	21.3709	21.7392	22.671	22.9359	22.8436	22.3262	22.1535	20.9979	21.9105
228	665	Q02248_RTSMGGTQQQFVEGVR_1xPhospho [S3(90.6)]_1xPhospho [T2(9.3); S3(90.6); T7(0.1)]	Q02248	Ctnnb1	5	5	22.3922	21.9693	22.1807	0.548166	1.34069	1.34069	6Mo-KO_1Way up vs WT	-2.19285	3.94157	0.42298	Q02248	RTSMGGTQQQFVEGVR	1xPhospho [S3(90.6)]	1xPhospho [T2(9.3); S3(90.6); T7(0.1)]	NP_001159374	0.0195307	0.00109972	Ctnnb1	catenin (cadherin associated protein), beta 1	12387	Ctnnb1	9 F4|9 72.19 cM	protein-coding	+1s	21.5814	22.4832	23.0699	23.9743	20.8524	23.1899	21.5633	21.4859	22.5656	21.0416
1473	666	Q4U4S6_SRTPPSPPR_2xPhospho [T3(100); S6(100)]_2xPhospho [S1(0); T3(100); S6(100)]	Q4U4S6	Xirp2	5	5	25.4303	25.4978	25.4641	0.548555	0.95429	-1.0479	6Mo-KO_1Way down vs WT	-1.24489	1.13369	-0.0675	Q4U4S6	SRTPPSPPR	2xPhospho [T3(100); S6(100)]	2xPhospho [S1(0); T3(100); S6(100)]	NP_001019789	0.00336752	0.000420153	Xirp2	xin actin-binding repeat containing 2	241431	Xirp2	2|2 C1.3	protein-coding	-0.5s	25.594	25.2099	25.4507	25.3134	25.5834	25.6508	25.4909	25.6422	25.4807	25.2243
52	667	E9Q616_SNSFSDEREFSAPSTPTGTLEFAGGDAK_1xPhospho [S/T]_1xPhospho [S1(49.9); S3(49.9); S5(0.1); S11(0.2); S14(0); T15(0); T17(0); T19(0)]	E9Q616	Ahnak	5	5	22.2264	22.528	22.3772	0.549445	0.811375	-1.23248	6Mo-KO_1Way down vs WT	-2.66546	1.75475	-0.30156	E9Q616	SNSFSDEREFSAPSTPTGTLEFAGGDAK	1xPhospho [S/T]	1xPhospho [S1(49.9); S3(49.9); S5(0.1); S11(0.2); S14(0); T15(0); T17(0); T19(0)]	NP_033773	0.0364373	0.00237867	Ahnak	AHNAK nucleoprotein (desmoyokin)	66395	Ahnak	19|19 A	protein-coding	-0.5s	22.3416	22.1009	21.6056	22.1603	22.9236	21.8446	22.1993	21.6613	22.892	24.0426
70	668	Q9WTQ5_RPSESDKEEELDKVK_2xPhospho [S3(100); S5(100)]_2xPhospho [S3(100); S5(100)]	Q9WTQ5	Akap12	5	5	23.6276	22.8782	23.2529	0.550057	1.68112	1.68112	6Mo-KO_1Way up vs WT	-4.05714	11.4661	0.74942	Q9WTQ5	RPSESDKEEELDKVK	2xPhospho [S3(100); S5(100)]	2xPhospho [S3(100); S5(100)]	NP_112462	0.0101298	0.000644898	Akap12	A kinase (PRKA) anchor protein (gravin) 12	83397	Akap12	10|10 A1	protein-coding	+2s	23.4686	23.9929	24.378	21.2146	25.0838	24.5129	21.268	23.9379	19.7655	24.9065
562	669	Q3UHZ5_GLSKYESIDEDELLASLSPEELK_2xPhospho [S3(99.7); S7(99.9)]_2xPhospho [S3(99.7); Y5(0.3); S7(99.9); S16(0.1); S18(0)]	Q3UHZ5	Lmod2	5	5	20.9881	21.3493	21.1687	0.55029	0.778517	-1.28449	6Mo-KO_1Way down vs WT	-3.24228	1.96511	-0.3612	Q3UHZ5	GLSKYESIDEDELLASLSPEELK	2xPhospho [S3(99.7); S7(99.9)]	2xPhospho [S3(99.7); Y5(0.3); S7(99.9); S16(0.1); S18(0)]	NP_444328	0.0284157	0.00132202	Lmod2	leiomodin 2 (cardiac)	93677	Lmod2	6|6 A3.1	protein-coding	-0.5s	21.693	22.1072	21.4832	20.4338	19.2231	21.3107	22.2833	21.304	20.7555	21.0928
58	670	E9Q616_GGVTGSPEASISGSK_1xPhospho [S6(97.3)]_1xPhospho [T4(2.7); S6(97.3); S10(0); S12(0); S14(0)]	E9Q616	Ahnak	5	5	23.244	23.0962	23.1701	0.550573	1.10789	1.10789	6Mo-KO_1Way up vs WT	-1.31882	1.61876	0.14782	E9Q616	GGVTGSPEASISGSK	1xPhospho [S6(97.3)]	1xPhospho [T4(2.7); S6(97.3); S10(0); S12(0); S14(0)]	NP_033773	0.0564682	0.00252693	Ahnak	AHNAK nucleoprotein (desmoyokin)	66395	Ahnak	19|19 A	protein-coding	+0.5s	22.7978	23.3165	23.1958	23.8064	23.1036	22.9602	23.0729	22.8777	23.7567	22.8135
1355	671	A2ASS6_LRPGSGGEKPPDEAPFTYQLK_1xPhospho [S5(100)]_1xPhospho [S5(100); T17(0); Y18(0)]	A2ASS6	---	5	5	25.8777	25.6641	25.7709	0.550978	1.15956	1.15956	6Mo-KO_1Way up vs WT	-1.49246	2.00673	0.21358	A2ASS6	LRPGSGGEKPPDEAPFTYQLK	1xPhospho [S5(100)]	1xPhospho [S5(100); T17(0); Y18(0)]	---	3.98144e-05	0.000420153	Ttn	titin	22138	Ttn	2 C3|2 45.13 cM	protein-coding	+0.5s	25.2202	25.852	25.594	26.4721	26.2501	24.8548	26.1091	25.4807	26.3334	25.5425
65	672	E9Q616_ASLGSLEGEVEAEASSPK_2xPhospho [S2(100); S5(100)]_2xPhospho [S2(100); S5(100); S15(0); S16(0)]	E9Q616	Ahnak	5	5	23.2318	23.4656	23.3487	0.552002	0.850416	-1.1759	6Mo-KO_1Way down vs WT	-2.14663	1.55246	-0.23376	E9Q616	ASLGSLEGEVEAEASSPK	2xPhospho [S2(100); S5(100)]	2xPhospho [S2(100); S5(100); S15(0); S16(0)]	NP_033773	0.00398584	0.000420153	Ahnak	AHNAK nucleoprotein (desmoyokin)	66395	Ahnak	19|19 A	protein-coding	-0.5s	23.9858	22.8802	23.6721	23.5664	22.0547	23.9379	23.0316	23.3274	23.6069	23.4242
862	673	A0A0U1RPA0_TVPLFPHPSVPSLSPTESKPALQPSPPTSPVRTPLEVR_2xPhospho [T28(98.3); S29(98.3)]_2xPhospho [T1(0); S9(0); S12(0); S14(0); T16(0); S18(0); S25(1.7); T28(98.3); S29(98.3); T33(1.7)]	A0A0U1RPA0	---	5	5	22.8254	22.2942	22.5598	0.552483	1.44521	1.44521	6Mo-KO_1Way up vs WT	-2.72194	5.68514	0.53128	A0A0U1RPA0	TVPLFPHPSVPSLSPTESKPALQPSPPTSPVRTPLEVR	2xPhospho [T28(98.3); S29(98.3)]	2xPhospho [T1(0); S9(0); S12(0); S14(0); T16(0); S18(0); S25(1.7); T28(98.3); S29(98.3); T33(1.7)]	---	0.0366892	0.00237867	Plekha7	pleckstrin homology domain containing, family A member 7	233765	Plekha7	7|7 F1	protein-coding	+1s	23.5053	22.3416	21.3182	22.7555	24.2066	23.7163	22.5293	22.298	19.6823	23.2449
1373	674	A2ASS6_TPSPIEAERK_2xPhospho [T1(100); S3(100)]_2xPhospho [T1(100); S3(100)]	A2ASS6	---	5	5	31.6408	31.5656	31.6032	0.552953	1.05352	1.05352	6Mo-KO_1Way up vs WT	-1.15259	1.27926	0.07522	A2ASS6	TPSPIEAERK	2xPhospho [T1(100); S3(100)]	2xPhospho [T1(100); S3(100)]	---	0.0453958	0.00237867	Ttn	titin	22138	Ttn	2 C3|2 45.13 cM	protein-coding	+0.5s	31.4966	31.737	31.737	31.737	31.4966	31.7391	31.3054	31.7391	31.3054	31.7391
731	675	Q9JJW5_VDGSNLEGGSQQGPSTPPNTPDPRSPPNPENIAPGYSGPLK_2xPhospho [S15(77.5); S25(99.9)]_2xPhospho [S4(0.3); S10(0.3); S15(77.5); T16(17.8); T20(4.3); S25(99.9); Y36(0); S37(0)]	Q9JJW5	Myoz2	5	5	27.6187	27.4867	27.5527	0.554113	1.09587	1.09587	6Mo-KO_1Way up vs WT	-1.28451	1.54261	0.13208	Q9JJW5	VDGSNLEGGSQQGPSTPPNTPDPRSPPNPENIAPGYSGPLK	2xPhospho [S15(77.5); S25(99.9)]	2xPhospho [S4(0.3); S10(0.3); S15(77.5); T16(17.8); T20(4.3); S25(99.9); Y36(0); S37(0)]	NP_067478	0.00642379	0.000644898	Myoz2	myozenin 2	59006	Myoz2	3|3 G1	protein-coding	+0.5s	27.6458	27.809	27.6918	27.9596	26.9875	27.8444	27.1824	27.5292	27.1824	27.6949
1106	676	A0A0B4J1E2_GPPSPPAPVMHSPSRK_2xPhospho [S4(100); S12(99.9)]_2xPhospho [S4(100); S12(99.9); S14(0.1)]	A0A0B4J1E2	Snw1	5	5	24.4188	24.2547	24.3367	0.554127	1.12047	1.12047	6Mo-KO_1Way up vs WT	-1.36491	1.71357	0.1641	A0A0B4J1E2	GPPSPPAPVMHSPSRK	2xPhospho [S4(100); S12(99.9)]	2xPhospho [S4(100); S12(99.9); S14(0.1)]	NP_079783	6.62199e-06	0.000420153	Snw1	SNW domain containing 1	66354	Snw1	12|12 D2	protein-coding	+0.5s	24.4434	24.0516	24.015	24.3847	25.1993	24.4333	24.7507	24.1412	24.1412	23.8071
138	677	Q921K9_VDSSTNSSPSPQQSESLSPAHTSDFR_2xPhospho [S/T]_2xPhospho [S3(7); S4(4.7); T5(3.4); S7(4.8); S8(3.8); S10(10.5); S14(54.2); S16(32.5); S18(61.5); T22(8.8); S23(8.8)]	Q921K9	Bcl7b	5	5	21.9777	21.8857	21.9317	0.554204	1.06582	1.06582	6Mo-KO_1Way up vs WT	-1.19051	1.35238	0.09196	Q921K9	VDSSTNSSPSPQQSESLSPAHTSDFR	2xPhospho [S/T]	2xPhospho [S3(7); S4(4.7); T5(3.4); S7(4.8); S8(3.8); S10(10.5); S14(54.2); S16(32.5); S18(61.5); T22(8.8); S23(8.8)]	NP_033875	0.0958662	0.00392242	Bcl7b	B cell CLL/lymphoma 7B	12054	Bcl7b	5|5 G2	protein-coding	+0.5s	21.7907	21.8756	22.3538	22.138	21.7303	21.8393	21.733	22.1685	21.669	22.0188
270	678	Q63918_SLEETLHNVDLSSDDELPRDEEALEDSAEEKMEESR_1xDeamidated [N8]; 2xPhospho [S12(79); S27(99.5)]_1xDeamidated [N8]; 2xPhospho [S1(0); T5(0.1); S12(79); S13(21.4); S27(99.5); S35(0)]	Q63918	Cavin2	5	5	23.0733	22.6004	22.8368	0.554455	1.38797	1.38797	6Mo-KO_1Way up vs WT	-2.45391	4.72738	0.47298	Q63918	SLEETLHNVDLSSDDELPRDEEALEDSAEEKMEESR	1xDeamidated [N8]; 2xPhospho [S12(79); S27(99.5)]	1xDeamidated [N8]; 2xPhospho [S1(0); T5(0.1); S12(79); S13(21.4); S27(99.5); S35(0)]	NP_620080	0.00351249	0.000420153	Cavin2	caveolae associated 2	20324	Cavin2	1|1 C1.1	protein-coding	+1s	22.7177	21.6565	23.3733	23.033	24.5862	23.7029	22.2097	21.9105	20.9464	24.2323
749	679	A0A0A6YY91_NPPEAATAPASPK_1xPhospho [S11(100)]_1xPhospho [T7(0); S11(100)]	A0A0A6YY91	---	5	5	20.375	20.9375	20.6562	0.554649	0.677128	-1.47683	6Mo-KO_1Way down vs WT	-6.34778	2.91047	-0.5625	A0A0A6YY91	NPPEAATAPASPK	1xPhospho [S11(100)]	1xPhospho [T7(0); S11(100)]	---	0.0531159	0.00252693	Ncam1	neural cell adhesion molecule 1	17967	Ncam1	9 A5.3|9 26.83 cM	protein-coding	-1s	20.8556	20.3733	17.8704	20.4254	22.3504	20.4218	21.9842	19.4262	20.4004	22.455
1050	680	Q8BTI8_TSPLMLDR_1xOxidation [M5]; 1xPhospho [T/S]_1xOxidation [M5]; 1xPhospho [T1(50); S2(50)]	Q8BTI8	Srrm2	5	5	21.0885	20.7891	20.9388	0.555675	1.23065	1.23065	6Mo-KO_1Way up vs WT	-1.76956	2.67999	0.29942	Q8BTI8	TSPLMLDR	1xOxidation [M5]; 1xPhospho [T/S]	1xOxidation [M5]; 1xPhospho [T1(50); S2(50)]	NP_780438	0.0971382	0.00392242	Srrm2	serine/arginine repetitive matrix 2	75956	Srrm2	17|17 A3.3	protein-coding	+0.5s	20.2123	21.0679	20.7591	21.8326	21.5705	20.3486	21.3137	20.0098	22.0749	20.1983
611	681	Q3TQG9_SFIVLAQLTR_1xDeamidated [Q7]; 1xPhospho [T9(100)]_1xDeamidated [Q7]; 1xPhospho [S1(0); T9(100)]	Q3TQG9	Zfp607a	5	5	19.4546	20.0127	19.7337	0.556756	0.679215	-1.47229	6Mo-KO_1Way down vs WT	-6.30554	2.90895	-0.55806	Q3TQG9	SFIVLAQLTR	1xDeamidated [Q7]; 1xPhospho [T9(100)]	1xDeamidated [Q7]; 1xPhospho [S1(0); T9(100)]	NP_001019897	0.0114095	0.000644898	Zfp607a	zinc finger protein 607A	545938	Zfp607a	7|7 A3	protein-coding	-1s	17.6864	19.9686	19.4714	19.3817	20.7649	19.757	21.3219	17.9129	19.0004	22.0711
229	682	Q02248_TSMGGTQQQFVEGVR_1xOxidation [M3]; 1xPhospho [T/S]_1xOxidation [M3]; 1xPhospho [T1(47.6); S2(47.6); T6(4.9)]	Q02248	Ctnnb1	5	5	21.8375	21.5621	21.6998	0.556898	1.21031	1.21031	6Mo-KO_1Way up vs WT	-1.69414	2.48168	0.27538	Q02248	TSMGGTQQQFVEGVR	1xOxidation [M3]; 1xPhospho [T/S]	1xOxidation [M3]; 1xPhospho [T1(47.6); S2(47.6); T6(4.9)]	NP_001159374	0.112927	0.00543843	Ctnnb1	catenin (cadherin associated protein), beta 1	12387	Ctnnb1	9 F4|9 72.19 cM	protein-coding	+0.5s	21.6056	21.311	21.6489	22.7133	21.9087	21.0977	20.716	21.2835	22.916	21.7974
293	683	B2RSU6_SSSSSTTPTSATSLYK_1xPhospho [S/T/Y]_1xPhospho [S1(29.8); S2(29.8); S3(29.8); S4(4.8); S5(4.8); T6(0.8); T7(0.2); T9(0); S10(0); T12(0); S13(0); Y15(0)]	B2RSU6	Cgnl1	5	5	21.1529	20.9148	21.0339	0.557405	1.17941	1.17941	6Mo-KO_1Way up vs WT	-1.57862	2.19585	0.23806	B2RSU6	SSSSSTTPTSATSLYK	1xPhospho [S/T/Y]	1xPhospho [S1(29.8); S2(29.8); S3(29.8); S4(4.8); S5(4.8); T6(0.8); T7(0.2); T9(0); S10(0); T12(0); S13(0); Y15(0)]	NP_001291291	0.000420204	0.000420153	Cgnl1	cingulin-like 1	68178	Cgnl1	9|9 D	protein-coding	+0.5s	21.2222	20.3586	20.6765	21.5206	21.9865	20.3819	21.2286	20.6592	21.7731	20.5313
853	684	A2AS44_VASPSQGQVGSSSPKR_2xPhospho [S3(99.9); S]_2xPhospho [S3(99.9); S5(0.1); S11(46.3); S12(46.3); S13(7.3)]	A2AS44	---	5	5	21.7737	21.6227	21.6982	0.558188	1.11028	1.11028	6Mo-KO_1Way up vs WT	-1.33674	1.64782	0.15092	A2AS44	VASPSQGQVGSSSPKR	2xPhospho [S3(99.9); S]	2xPhospho [S3(99.9); S5(0.1); S11(46.3); S12(46.3); S13(7.3)]	---	0.100387	0.00392242	Pkp4	plakophilin 4	227937	Pkp4	2|2 C1.1	protein-coding	+0.5s	22.3337	21.3743	21.7638	21.4704	21.9261	21.9803	20.9753	21.7892	21.842	21.5269
1419	685	A0A338P6D9_AGSPQLDDIR_1xPhospho [S3(100)]_1xPhospho [S3(100)]	A0A338P6D9	---	5	5	21.9695	21.798	21.8837	0.558671	1.12621	1.12621	6Mo-KO_1Way up vs WT	-1.39144	1.76484	0.17148	A0A338P6D9	AGSPQLDDIR	1xPhospho [S3(100)]	1xPhospho [S3(100)]	---	0.00524119	0.000644898	Eif2b5	eukaryotic translation initiation factor 2B, subunit 5 epsilon	224045	Eif2b5	16|16 A3	protein-coding	+0.5s	21.717	21.8297	21.6772	22.5295	22.094	21.3771	22.0215	21.5843	22.6054	21.4017
561	686	Q3UHZ5_GLSKYESIDEDELLASLSPEELKELER_2xPhospho [S3(100); S7(100)]_2xPhospho [S3(100); Y5(0); S7(100); S16(0); S18(0)]	Q3UHZ5	Lmod2	5	5	24.0799	23.8957	23.9878	0.559658	1.1362	1.1362	6Mo-KO_1Way up vs WT	-1.42778	1.8432	0.18422	Q3UHZ5	GLSKYESIDEDELLASLSPEELKELER	2xPhospho [S3(100); S7(100)]	2xPhospho [S3(100); Y5(0); S7(100); S16(0); S18(0)]	NP_444328	2.96296e-05	0.000420153	Lmod2	leiomodin 2 (cardiac)	93677	Lmod2	6|6 A3.1	protein-coding	+0.5s	24.8298	23.8166	23.5932	24.2138	23.946	23.6684	24.3965	24.4333	23.5508	23.4293
838	687	Q2TBE6_VAAAAGSGPSPPCSPGHDR_1xCarbamidomethyl [C13]; 2xPhospho [S10(99.8); S14(100)]_1xCarbamidomethyl [C13]; 2xPhospho [S7(0.2); S10(99.8); S14(100)]	Q2TBE6	Pi4k2a	5	5	21.1476	20.7132	20.9304	0.5607	1.35133	1.35133	6Mo-KO_1Way up vs WT	-2.3229	4.24183	0.43438	Q2TBE6	VAAAAGSGPSPPCSPGHDR	1xCarbamidomethyl [C13]; 2xPhospho [S10(99.8); S14(100)]	1xCarbamidomethyl [C13]; 2xPhospho [S7(0.2); S10(99.8); S14(100)]	NP_663476	0.0105643	0.000644898	Pi4k2a	phosphatidylinositol 4-kinase type 2 alpha	84095	Pi4k2a	19 C3|19 35.74 cM	protein-coding	+1s	19.7335	21.6977	21.1798	20.2388	22.8883	21.9681	19.3348	21.2615	20.1704	20.8314
230	688	D3Z2H7_GSLASLDSLRK_2xPhospho [S2(100); S5(100)]_2xPhospho [S2(100); S5(100); S8(0)]	D3Z2H7	---	5	5	23.4547	23.0442	23.2494	0.565192	1.32911	1.32911	6Mo-KO_1Way up vs WT	-2.24609	3.96779	0.41046	D3Z2H7	GSLASLDSLRK	2xPhospho [S2(100); S5(100)]	2xPhospho [S2(100); S5(100); S8(0)]	---	0.0200822	0.00109972	Ctnnd1	catenin (cadherin associated protein), delta 1	12388	Ctnnd1	2 D|2 49.45 cM	protein-coding	+1s	23.662	23.955	24.4213	23.1834	22.0517	23.3505	21.0817	23.2868	23.0125	24.4896
1422	689	Q99LG1_IQQQAGTVPHSQEEDSQEEEEDVSSR_1xPhospho [S16(93.7)]_1xPhospho [T7(0.5); S11(5.7); S16(93.7); S24(0.1); S25(0.1)]	Q99LG1	Tmem51	5	5	21.0716	20.7263	20.8989	0.56612	1.27043	1.27043	6Mo-KO_1Way up vs WT	-1.97985	3.19548	0.34532	Q99LG1	IQQQAGTVPHSQEEDSQEEEEDVSSR	1xPhospho [S16(93.7)]	1xPhospho [T7(0.5); S11(5.7); S16(93.7); S24(0.1); S25(0.1)]	NP_663377	0.066425	0.00288454	Tmem51	transmembrane protein 51	214359	Tmem51	4|4 D3	protein-coding	+0.5s	20.843	21.3583	21.229	19.3517	22.5761	20.327	21.1691	19.9316	21.1727	21.0311
244	690	Q63918_GNNSAVGSNADLTIEEDEEEEPVALQQAQQVR_1xDeamidated [Q/N]; 1xPhospho [S4(96.3)]_1xDeamidated [N2; N9; Q26; Q27; Q29; Q30]; 1xPhospho [S4(96.3); S8(3.7); T13(0)]	Q63918	Cavin2	5	5	22.0287	21.4067	21.7177	0.566433	1.53901	1.53901	6Mo-KO_1Way up vs WT	-3.42686	8.11667	0.622	Q63918	GNNSAVGSNADLTIEEDEEEEPVALQQAQQVR	1xDeamidated [Q/N]; 1xPhospho [S4(96.3)]	1xDeamidated [N2; N9; Q26; Q27; Q29; Q30]; 1xPhospho [S4(96.3); S8(3.7); T13(0)]	NP_620080	0.000904503	0.000420153	Cavin2	caveolae associated 2	20324	Cavin2	1|1 C1.1	protein-coding	+1s	20.0119	21.6299	22.149	21.6056	24.7472	24.0708	20.13	20.388	21.2104	21.2344
988	691	A2AFJ8_MSGFMYQGK_1xOxidation [M5]; 1xPhospho [S2(99.7)]_1xOxidation [M5]; 1xPhospho [S2(99.7); Y6(0.3)]	A2AFJ8	---	5	5	21.8114	21.5627	21.687	0.568635	1.18814	1.18814	6Mo-KO_1Way up vs WT	-1.64269	2.31893	0.2487	A2AFJ8	MSGFMYQGK	1xOxidation [M5]; 1xPhospho [S2(99.7)]	1xOxidation [M5]; 1xPhospho [S2(99.7); Y6(0.3)]	---	0.0520415	0.00252693	Arhgef6	Rac/Cdc42 guanine nucleotide exchange factor (GEF) 6	73341	Arhgef6	X|X A6	protein-coding	+0.5s	21.6219	21.2744	21.3976	22.3894	22.3735	20.8563	22.0597	20.9698	22.6478	21.2797
987	692	H3BJU7_LQDSSDPDTGSEEEVSSRLSPPHSPR_2xPhospho [S20(98.4); S24(100)]_2xPhospho [S4(0); S5(0); T9(0); S11(0); S16(0.3); S17(1.3); S20(98.4); S24(100)]	H3BJU7	---	5	5	22.5681	22.7683	22.6682	0.568768	0.870406	-1.14889	6Mo-KO_1Way down vs WT	-1.96876	1.49154	-0.20024	H3BJU7	LQDSSDPDTGSEEEVSSRLSPPHSPR	2xPhospho [S20(98.4); S24(100)]	2xPhospho [S4(0); S5(0); T9(0); S11(0); S16(0.3); S17(1.3); S20(98.4); S24(100)]	---	0.0189943	0.00109972	Arhgef2	rho/rac guanine nucleotide exchange factor (GEF) 2	16800	Arhgef2	3|3 F1	protein-coding	-0.5s	22.782	22.7288	23.0283	22.9236	21.3777	22.6432	22.298	22.7243	23.0671	23.109
78	693	F8WGR0_SPPDQSAVPNTPPSTPVKLEEAGDGCAK_1xCarbamidomethyl [C26]; 2xPhospho [T11(98.1); T15(80.1)]_1xCarbamidomethyl [C26]; 2xPhospho [S1(0.1); S6(1.7); T11(98.1); S14(20); T15(80.1)]	F8WGR0	Add1	5	5	21.8059	21.66	21.7329	0.568914	1.10641	1.10641	6Mo-KO_1Way up vs WT	-1.33833	1.63829	0.14588	F8WGR0	SPPDQSAVPNTPPSTPVKLEEAGDGCAK	1xCarbamidomethyl [C26]; 2xPhospho [T11(98.1); T15(80.1)]	1xCarbamidomethyl [C26]; 2xPhospho [S1(0.1); S6(1.7); T11(98.1); S14(20); T15(80.1)]	NP_001095914	0.0164079	0.00109972	Add1	adducin 1 (alpha)	11518	Add1	5 B2|5 17.9 cM	protein-coding	+0.5s	21.8297	21.8462	21.7937	22.0078	21.5522	21.6727	22.4831	21.326	21.7123	21.1061
482	694	P11499_IEDVGSDEEDDSGKDKK_2xPhospho [S6(100); S12(100)]_2xPhospho [S6(100); S12(100)]	P11499	Hsp90ab1	5	5	22.3327	22.674	22.5034	0.569587	0.789297	-1.26695	6Mo-KO_1Way down vs WT	-3.17972	1.98093	-0.34136	P11499	IEDVGSDEEDDSGKDKK	2xPhospho [S6(100); S12(100)]	2xPhospho [S6(100); S12(100)]	NP_032328	1.22981e-05	0.000420153	Hsp90ab1	heat shock protein 90 alpha (cytosolic), class B member 1	15516	Hsp90ab1	17 B3|17 22.59 cM	protein-coding	-0.5s	21.8928	22.8242	22.867	20.7196	23.3597	22.0405	21.8048	22.776	23.1479	23.6009
291	695	E9QAS5_WGQPPSPTPVPRPPDADPNTPSPKPLEGRPER_1xDeamidated [Q/N]; 2xPhospho [T20(98); S22(100)]_1xDeamidated [Q3; N19]; 2xPhospho [S6(1.6); T8(0.4); T20(98); S22(100)]	E9QAS5	---	5	5	23.6535	24.3042	23.9789	0.570359	0.63698	-1.56991	6Mo-KO_1Way down vs WT	-9.10295	3.69346	-0.65068	E9QAS5	WGQPPSPTPVPRPPDADPNTPSPKPLEGRPER	1xDeamidated [Q/N]; 2xPhospho [T20(98); S22(100)]	1xDeamidated [Q3; N19]; 2xPhospho [S6(1.6); T8(0.4); T20(98); S22(100)]	---	0.111467	0.00528354	Chd4	chromodomain helicase DNA binding protein 4	107932	Chd4	6 F2|6 59.28 cM	protein-coding	-1s	24.4858	24.5916	24.8989	24.8499	19.4414	24.485	25.1085	24.5282	23.2391	24.1602
362	696	Q62511_RSSPSNRPPDGPGHQPAAAKPPSPAQGK_2xPhospho [S23(100); S]_2xPhospho [S2(16.1); S3(67.8); S5(16.1); S23(100)]	Q62511	Zfp91	5	5	23.6644	23.4706	23.5675	0.571237	1.1438	1.1438	6Mo-KO_1Way up vs WT	-1.47765	1.93319	0.19384	Q62511	RSSPSNRPPDGPGHQPAAAKPPSPAQGK	2xPhospho [S23(100); S]	2xPhospho [S2(16.1); S3(67.8); S5(16.1); S23(100)]	NP_443735	0.051337	0.00252693	Zfp91	zinc finger protein 91	109910	Zfp91	19 A|19 8.73 cM	protein-coding	+0.5s	23.9003	23.2929	23.5545	23.1257	24.4486	23.4538	23.9216	23.6782	23.6938	22.6054
1468	697	Q66JT0_ADTETDQGLNKKLSFSFCEEDTESEGQMTAQDIGGAQSQKPGR_1xCarbamidomethyl [C18]; 2xDeamidated [N10; Q37]; 1xPhospho [T/S]_1xCarbamidomethyl [C18]; 2xDeamidated [N10; Q37]; 1xPhospho [T3(17.5); T5(30.9); S14(7.2); S16(5.3); T22(7.2); S24(7.2); T29(17.5); S38(7.2¬'╓$b*	Q66JT0	Wee2	5	5	18.9234	19.3357	19.1295	0.572907	0.751393	-1.33086	6Mo-KO_1Way down vs WT	-4.08463	2.30615	-0.41236	Q66JT0	ADTETDQGLNKKLSFSFCEEDTESEGQMTAQDIGGAQSQKPGR	1xCarbamidomethyl [C18]; 2xDeamidated [N10; Q37]; 1xPhospho [T/S]	1xCarbamidomethyl [C18]; 2xDeamidated [N10; Q37]; 1xPhospho [T3(17.5); T5(30.9); S14(7.2); S16(5.3); T22(7.2); S24(7.2); T29(17.5); S38(7.2¬'╓$b*	NP_958758	0.00265195	0.000420153	Wee2	WEE1 homolog 2 (S. pombe)	381759	Wee2	6|6 B1	protein-coding	-1s	17.7998	18.9917	17.324	19.5039	20.9975	18.6605	19.7142	18.9056	20.1065	19.2919
942	698	E9QAT4_GSPVRHSPPELSQEEFGESFADPGSSR_2xPhospho [S2(100); S7(100)]_2xPhospho [S2(100); S7(100); S12(0); S19(0); S25(0); S26(0)]	E9QAT4	Sec16a	5	5	22.9611	23.2382	23.0997	0.572924	0.825271	-1.21172	6Mo-KO_1Way down vs WT	-2.5742	1.75322	-0.27706	E9QAT4	GSPVRHSPPELSQEEFGESFADPGSSR	2xPhospho [S2(100); S7(100)]	2xPhospho [S2(100); S7(100); S12(0); S19(0); S25(0); S26(0)]	NP_694765	0.0274486	0.00132202	Sec16a	SEC16 homolog A, endoplasmic reticulum export factor	227648	Sec16a	2|2 A3	protein-coding	-0.5s	23.146	22.8535	22.1072	22.736	23.9628	23.3818	24.3003	23.4293	23.0164	22.063
275	699	D3Z147_ADVQLFMADDAYSHHSGVDYADPEK_1xOxidation [M7]; 2xPhospho [S13(100); S16(100)]_1xOxidation [M7]; 2xPhospho [Y12(0); S13(100); S16(100); Y20(0)]	D3Z147	---	5	5	26.8386	26.7279	26.7832	0.573022	1.07974	1.07974	6Mo-KO_1Way up vs WT	-1.25153	1.45907	0.11068	D3Z147	ADVQLFMADDAYSHHSGVDYADPEK	1xOxidation [M7]; 2xPhospho [S13(100); S16(100)]	1xOxidation [M7]; 2xPhospho [Y12(0); S13(100); S16(100); Y20(0)]	---	7.49893e-05	0.000420153	Cav2	caveolin 2	12390	Cav2	6|6 A2	protein-coding	+0.5s	27.0163	26.9455	27.0163	27.0163	26.1985	26.8151	26.5083	26.8896	26.4773	26.9492
243	700	Q63918_SSPFKVSPLSFGR_2xPhospho [S7(100); S]_2xPhospho [S1(50); S2(50); S7(100); S10(0)]	Q63918	Cavin2	5	5	31.1425	30.8653	31.0039	0.573694	1.21184	1.21184	6Mo-KO_1Way up vs WT	-1.75643	2.57942	0.2772	Q63918	SSPFKVSPLSFGR	2xPhospho [S7(100); S]	2xPhospho [S1(50); S2(50); S7(100); S10(0)]	NP_620080	6.28959e-05	0.000420153	Cavin2	caveolae associated 2	20324	Cavin2	1|1 C1.1	protein-coding	+0.5s	30.8591	30.5665	30.5665	31.3027	32.4176	30.865	31.8835	30.865	30.865	29.8479
1339	701	A2ASS6_RRSLGDMSDEELLLPIDDYLAMK_2xOxidation [M7; M22]; 2xPhospho [S3(100); S8(100)]_2xOxidation [M7; M22]; 2xPhospho [S3(100); S8(100); Y19(0)]	A2ASS6	---	5	5	25.1671	24.9446	25.0558	0.57596	1.16679	1.16679	6Mo-KO_1Way up vs WT	-1.57758	2.1477	0.22254	A2ASS6	RRSLGDMSDEELLLPIDDYLAMK	2xOxidation [M7; M22]; 2xPhospho [S3(100); S8(100)]	2xOxidation [M7; M22]; 2xPhospho [S3(100); S8(100); Y19(0)]	---	0.000483676	0.000420153	Ttn	titin	22138	Ttn	2 C3|2 45.13 cM	protein-coding	+0.5s	25.5834	25.186	25.8218	24.9484	24.2961	24.5761	24.3646	25.8921	25.2054	24.6848
828	702	P97467_GKGSSGLNLGNFFASR_2xPhospho [S4(100); S5(100)]_2xPhospho [S4(100); S5(100); S15(0)]	P97467	Pam	5	5	22.0196	22.4863	22.2529	0.577045	0.723618	-1.38194	6Mo-KO_1Way down vs WT	-4.98671	2.61115	-0.4667	P97467	GKGSSGLNLGNFFASR	2xPhospho [S4(100); S5(100)]	2xPhospho [S4(100); S5(100); S15(0)]	NP_038654	0.00320593	0.000420153	Pam	peptidylglycine alpha-amidating monooxygenase	18484	Pam	1 D|1 47.76 cM	protein-coding	-1s	22.1161	20.9843	23.3254	20.7547	22.9173	22.6398	24.54	22.6606	21.8393	20.7516
1103	703	Q5F247_RKDSPPLVTPPQSPPSSQPPAMTQAPR_2xPhospho [S4(100); T9(98.7)]_2xPhospho [S4(100); T9(98.7); S13(1.3); S16(0); S17(0); T23(0)]	Q5F247	---	5	5	21.443	21.1022	21.2726	0.577144	1.26642	1.26642	6Mo-KO_1Way up vs WT	-2.01585	3.23307	0.34076	Q5F247	RKDSPPLVTPPQSPPSSQPPAMTQAPR	2xPhospho [S4(100); T9(98.7)]	2xPhospho [S4(100); T9(98.7); S13(1.3); S16(0); S17(0); T23(0)]	---	5.76591e-07	0.000420153	Smtnl2	smoothelin-like 2	276829	Smtnl2	11|11 B4	protein-coding	+0.5s	20.9843	21.3777	21.4439	21.0307	22.3783	20.9464	22.2735	21.4962	21.6369	19.1581
910	704	Q9DB52_RIDFIPVSPAPSPTR_2xPhospho [S8(100); S/T]_2xPhospho [S8(100); S12(50); T14(50)]	Q9DB52	Fam122a	5	5	20.7516	21.1659	20.9587	0.577155	0.750373	-1.33267	6Mo-KO_1Way down vs WT	-4.16525	2.34528	-0.41432	Q9DB52	RIDFIPVSPAPSPTR	2xPhospho [S8(100); S/T]	2xPhospho [S8(100); S12(50); T14(50)]	NP_080796	8.15944e-05	0.000420153	Fam122a	family with sequence similarity 122, member A	68034	Fam122a	19|19 B	protein-coding	-1s	21.7347	21.3265	21.134	21.3777	18.185	21.5873	20.0727	21.7731	21.1931	21.2033
709	705	Q8VDD5_KGTGDCSDEEVDGK_1xCarbamidomethyl [C6]; 1xPhospho [S7(86.1)]_1xCarbamidomethyl [C6]; 1xPhospho [T3(13.9); S7(86.1)]	Q8VDD5	Myh9	5	5	19.7858	20.1563	19.9711	0.577855	0.773514	-1.2928	6Mo-KO_1Way down vs WT	-3.5887	2.14721	-0.3705	Q8VDD5	KGTGDCSDEEVDGK	1xCarbamidomethyl [C6]; 1xPhospho [S7(86.1)]	1xCarbamidomethyl [C6]; 1xPhospho [T3(13.9); S7(86.1)]	NP_071855	0.0971382	0.00392242	Myh9	myosin, heavy polypeptide 9, non-muscle	17886	Myh9	15 E1|15 36.81 cM	protein-coding	-0.5s	19.1325	19.3817	19.901	20.2327	20.2812	19.2772	20.4744	20.7037	21.8862	18.4401
1017	706	O35609_KLSPTEPR_1xPhospho [S3(99.4)]_1xPhospho [S3(99.4); T5(0.7)]	O35609	Scamp3	5	5	22.8388	22.6885	22.7636	0.578303	1.10983	1.10983	6Mo-KO_1Way up vs WT	-1.36421	1.68034	0.15034	O35609	KLSPTEPR	1xPhospho [S3(99.4)]	1xPhospho [S3(99.4); T5(0.7)]	NP_001296838	0.0306626	0.00157378	Scamp3	secretory carrier membrane protein 3	24045	Scamp3	3|3 F1	protein-coding	+0.5s	22.3468	22.9273	22.7133	23.1704	23.0364	22.4027	22.7353	22.8594	23.3616	22.0835
646	707	P53986_EGKEDEASTDVDEKPK_2xPhospho [S8(100); T9(100)]_2xPhospho [S8(100); T9(100)]	P53986	Slc16a1	5	5	21.9274	22.56	22.2437	0.578462	0.645004	-1.55038	6Mo-KO_1Way down vs WT	-8.88744	3.69744	-0.63262	P53986	EGKEDEASTDVDEKPK	2xPhospho [S8(100); T9(100)]	2xPhospho [S8(100); T9(100)]	NP_033222	0.00230422	0.000420153	Slc16a1	solute carrier family 16 (monocarboxylic acid transporters), member 1	20501	Slc16a1	3|3 F2.2	protein-coding	-1s	21.4025	24.33	23.9003	19.9344	20.0699	22.3388	20.8871	23.4933	21.9623	24.1187
713	708	E9Q9T8_RTSLAGAGR_1xPhospho [S3(100)]_1xPhospho [T2(0.1); S3(100)]	E9Q9T8	---	5	5	23.6759	25.2915	24.4837	0.578893	0.326316	-3.06452	6Mo-KO_1Way down vs WT	-266.281	28.3541	-1.61566	E9Q9T8	RTSLAGAGR	1xPhospho [S3(100)]	1xPhospho [T2(0.1); S3(100)]	---	0.00535271	0.000644898	Mybpc3	myosin binding protein C, cardiac	17868	Mybpc3	2|2 E1	protein-coding	-3s	20.6375	20.3449	20.8742	27.6918	28.831	20.6951	28.9122	29.4604	27.4664	19.9236
977	709	Q3U0S6_SVSELSLQGR_2xPhospho [S3(100); S6(100)]_2xPhospho [S1(0); S3(100); S6(100)]	Q3U0S6	Rasip1	5	5	20.2923	19.9831	20.1377	0.579199	1.23902	1.23902	6Mo-KO_1Way up vs WT	-1.89803	2.9138	0.3092	Q3U0S6	SVSELSLQGR	2xPhospho [S3(100); S6(100)]	2xPhospho [S1(0); S3(100); S6(100)]	NP_082820	0.0183441	0.00109972	Rasip1	Ras interacting protein 1	69903	Rasip1	7|7 B3	protein-coding	+0.5s	20.8709	19.7885	20.166	19.1746	21.4613	20.4907	18.8454	20.7999	19.524	20.2553
1155	710	B2RXQ9_SEPAVGPLR_1xPhospho [S1(100)]_1xPhospho [S1(100)]	B2RXQ9	Sorbs2	5	5	23.8342	23.601	23.7176	0.579257	1.17542	1.17542	6Mo-KO_1Way up vs WT	-1.62152	2.24033	0.23318	B2RXQ9	SEPAVGPLR	1xPhospho [S1(100)]	1xPhospho [S1(100)]	NP_001297636	0.0921424	0.00378567	Sorbs2	sorbin and SH3 domain containing 2	234214	Sorbs2	8|8 B1.1	protein-coding	+0.5s	23.4058	23.7078	23.5495	24.233	24.2749	23.1606	24.2953	23.3706	24.5623	22.6163
1239	711	Q8BWB1_SPSPTPSLPPSWK_1xPhospho [S1(99.5)]_1xPhospho [S1(99.5); S3(0.5); T5(0); S7(0); S11(0)]	Q8BWB1	Synpo2l	5	5	24.4053	23.9956	24.2005	0.579912	1.32839	1.32839	6Mo-KO_1Way up vs WT	-2.34254	4.1337	0.40968	Q8BWB1	SPSPTPSLPPSWK	1xPhospho [S1(99.5)]	1xPhospho [S1(99.5); S3(0.5); T5(0); S7(0); S11(0)]	NP_001297361	3.84384e-05	0.000420153	Synpo2l	synaptopodin 2-like	68760	Synpo2l	14|14 A3	protein-coding	+1s	24.2541	25.0179	24.1666	22.6131	25.9749	23.0484	25.1973	24.4807	24.37	22.8818
39	712	E9Q9C4_TLSPTPSAEGYQDVR_1xPhospho [S3(89.8)]_1xPhospho [T1(1); S3(89.8); T5(9.2); S7(0); Y11(0)]	E9Q9C4	---	5	5	22.6028	22.3518	22.4773	0.580648	1.18998	1.18998	6Mo-KO_1Way up vs WT	-1.68672	2.38849	0.25094	E9Q9C4	TLSPTPSAEGYQDVR	1xPhospho [S3(89.8)]	1xPhospho [T1(1); S3(89.8); T5(9.2); S7(0); Y11(0)]	---	0.000663763	0.000420153	Ablim1	actin-binding LIM protein 1	226251	Ablim1	19 D2|19 52.09 cM	protein-coding	+0.5s	21.8792	22.3783	22.3228	23.4111	23.0225	21.5422	22.7172	21.8011	23.4538	22.2449
557	713	Q3UHZ5_SRPPSPVAPPPPPPPPPLPPHMLPPPPPPPAPPLPEK_1xOxidation [M22]; 2xPhospho [S1(100); S5(100)]_1xOxidation [M22]; 2xPhospho [S1(100); S5(100)]	Q3UHZ5	Lmod2	5	5	23.2534	22.6529	22.9532	0.581473	1.51631	1.51631	6Mo-KO_1Way up vs WT	-3.50738	8.06409	0.60056	Q3UHZ5	SRPPSPVAPPPPPPPPPLPPHMLPPPPPPPAPPLPEK	1xOxidation [M22]; 2xPhospho [S1(100); S5(100)]	1xOxidation [M22]; 2xPhospho [S1(100); S5(100)]	NP_444328	0.0903315	0.00360171	Lmod2	leiomodin 2 (cardiac)	93677	Lmod2	6|6 A3.1	protein-coding	+1s	24.5705	23.9299	22.094	20.3298	25.343	21.3703	22.7032	24.2323	21.7018	23.2568
957	714	A0A0N4SW73_RGSVGEKGSPSLGASPHHSSTGEEK_2xPhospho [S3(100); S9(99.3)]_2xPhospho [S3(100); S9(99.3); S11(0.7); S15(0); S19(0); S20(0); T21(0)]	A0A0N4SW73	Rab11fip5	5	5	22.8101	23.0094	22.9097	0.581986	0.870985	-1.14813	6Mo-KO_1Way down vs WT	-2.00055	1.51765	-0.19928	A0A0N4SW73	RGSVGEKGSPSLGASPHHSSTGEEK	2xPhospho [S3(100); S9(99.3)]	2xPhospho [S3(100); S9(99.3); S11(0.7); S15(0); S19(0); S20(0); T21(0)]	NP_001003955	0.00198802	0.000420153	Rab11fip5	RAB11 family interacting protein 5 (class I)	52055	Rab11fip5	6 C3|6 37.35 cM	protein-coding	-0.5s	23.1184	22.9173	22.9495	22.1642	22.9013	23.5319	22.4254	23.914	22.3947	22.7811
654	715	V9GWW6_SNPSHQRPLSPASCPTFSLNSLASSTLALDQK_1xCarbamidomethyl [C14]; 1xDeamidated [N20]; 2xPhospho [S/T]_1xCarbamidomethyl [C14]; 1xDeamidated [Q6; N20]; 2xPhospho [S1(15.6); S4(15.6); S10(66.1); S13(41.4); T16(41.4); S18(17.8); S21(1.7); S24(0.1); S25(0.1); T¬'╓$b*	V9GWW6	---	5	5	21.1861	20.86	21.0231	0.582319	1.25364	1.25364	6Mo-KO_1Way up vs WT	-1.98081	3.11305	0.32612	V9GWW6	SNPSHQRPLSPASCPTFSLNSLASSTLALDQK	1xCarbamidomethyl [C14]; 1xDeamidated [N20]; 2xPhospho [S/T]	1xCarbamidomethyl [C14]; 1xDeamidated [Q6; N20]; 2xPhospho [S1(15.6); S4(15.6); S10(66.1); S13(41.4); T16(41.4); S18(17.8); S21(1.7); S24(0.1); S25(0.1); T¬'╓$b*	---	0.095236	0.00392242	Mlip	muscular LMNA-interacting protein	69642	Mlip	9|9 D	protein-coding	+0.5s	21.8094	20.1854	20.9111	20.8604	22.1642	20.8111	20.502	21.6844	19.4162	21.8862
[truncated: 770 more rows]
