# Supplementary material for: Alterations in cytoskeletal and Ca2+ cycling regulators in atria lacking the obscurin Ig58/59 module
Source: Front Cardiovasc Med. 2023 Apr 13;10:1085840. doi: 10.3389/fcvm.2023.1085840 (PMC10251194; doi:10.3389/fcvm.2023.1085840)
Supplement: Supplementary file 11 [file Data_Sheet_3.xlsx]

## Sheet: 12month_RawData_All-Proteins-T-
Column #	Sort	Column ID	Entrez Gene Symbol (NCBI curated)	Obs 12mo(corr) (KO)	Obs 12mo(corr) (WT)	Mean 12mo(corr) (KO)	Mean 12mo(corr) (WT)	KO_1Way vs. WT_12mo (corr) (p-val)	KO_1Way vs. WT_12mo (corr) (ratio)	KO_1Way vs. WT_12mo (corr) Lin(FC)	KO_1Way vs. WT_12mo (corr) (Description)	KO_1Way vs. WT_12mo (corr) 95% lower limit	KO_1Way vs. WT_12mo (corr) 95% upper limit	KO_1Way vs. WT_12mo (corr) Log2(FC)	Entrez Symbol (NCBI)	Entrez Gene Symbol (NCBI curated)	Gene Name (NCBI)	Symbol from nomenclature authority (NCBI)	Entrez Gene ID (curated)	Entrez GeneID (NCBI)	CytoLoc (NCBI)	type_of_gene (NCBI)	Avg 12mo(corr) (WT+ KO)	Min 12mo(corr) (WT+ KO)	Max 12mo(corr) (WT+ KO)	SD Binned KO_1Way vs. WT_12mo (corr) Log2(FC)	Abundances (Normalized): F11: Sample, WT	Abundances (Normalized): F12: Sample, WT	Abundances (Normalized): F13: Sample, WT	Abundances (Normalized): F14: Sample, WT	Abundances (Normalized): F15: Sample, WT	Abundances (Normalized): F16: Sample, KO	Abundances (Normalized): F17: Sample, KO	Abundances (Normalized): F18: Sample, KO	Abundances (Normalized): F19: Sample, KO	Abundances (Normalized): F20: Sample, KO
4	1	A2ASS6	Ttn	5	5	31.8311	31.8319	0	0.999482	-1.00052	KO_1Way down vs WT_12mo	1	1	-0.000746997	Ttn	Ttn	titin	Ttn	22138	22138	2 C3|2 45.13 cM	protein-coding	31.8315	31.8311	31.8319	-0.5σ	31.8319	31.8319	31.8319	31.8319	31.8319	31.8311	31.8311	31.8311	31.8311	31.8311
16	2	Q9JI91	Actn2	5	5	29.555	29.557	0	0.998577	-1.00142	KO_1Way down vs WT_12mo	1	1	-0.00205386	Actn2	Actn2	actinin alpha 2	Actn2	11472	11472	13 A1|13 4.54 cM	protein-coding	29.556	29.555	29.557	-0.5σ	29.557	29.557	29.557	29.557	29.557	29.555	29.555	29.555	29.555	29.555
26	3	P62737	Acta2	5	5	32.6253	32.6258	2.88072e-22	0.99965	-1.00035	KO_1Way down vs WT_12mo	-1.00035	-1.00035	-0.000505392	Acta2	Acta2	actin, alpha 2, smooth muscle, aorta	Acta2	11475	11475	19|19 C1	protein-coding	32.6255	32.6253	32.6258	-0.5σ	32.6258	32.6258	32.6258	32.6258	32.6258	32.6253	32.6253	32.6253	32.6253	32.6253
274	4	Q61781	Krt14	5	5	19.3512	24.2327	3.44932e-12	0.033925	-29.4768	KO_1Way down vs WT_12mo	-33.2303	-26.1472	-4.88151	Krt14	Krt14	keratin 14	Krt14	16664	16664	11 63.43 cM|11 D	protein-coding	21.7919	19.3512	24.2327	≤ -6σ	24.3683	24.2024	24.2182	24.2491	24.1254	19.371	19.2009	19.2199	19.5398	19.4243
1542	5	G3UWC2	Naalad2	5	5	15.7608	19.7974	6.31148e-11	0.0609348	-16.411	KO_1Way down vs WT_12mo	-18.9276	-14.229	-4.03659	Naalad2	Naalad2	N-acetylated alpha-linked acidic dipeptidase 2	Naalad2	72560	72560	9 A2|9 7.02 cM	protein-coding	17.7791	15.7608	19.7974	≤ -6σ	19.745	19.8801	19.7279	19.751	19.8832	15.9705	15.8276	15.4991	15.6576	15.8494
546	6	Q922U2	Krt5	5	5	19.4311	23.4705	3.1099e-09	0.060814	-16.4436	KO_1Way down vs WT_12mo	-20.7594	-13.025	-4.03945	Krt5	Krt5	keratin 5	Krt5	110308	110308	15 F2|15 56.98 cM	protein-coding	21.4508	19.4311	23.4705	≤ -6σ	23.7207	23.5287	23.2531	23.5633	23.2868	19.7362	19.371	19.0602	19.611	19.3769
161	7	Q99MR8	Mccc1	5	5	24.0666	25.1009	1.3212e-08	0.488226	-2.04823	KO_1Way down vs WT_12mo	-2.20039	-1.9066	-1.03438	Mccc1	Mccc1	methylcrotonoyl-Coenzyme A carboxylase 1 (alpha)	Mccc1	72039	72039	3|3 B	protein-coding	24.5837	24.0666	25.1009	-3σ	25.0137	25.1512	25.1512	25.1059	25.0826	24.2089	24.0047	24.063	24.0359	24.0203
462	8	Q9DBL1	Acadsb	5	5	24.7153	22.867	1.9416e-08	3.6007	3.6007	KO_1Way up vs WT_12mo	3.14775	4.11883	1.84828	Acadsb	Acadsb	acyl-Coenzyme A dehydrogenase, short/branched chain	Acadsb	66885	66885	7|7 F3	protein-coding	23.7911	22.867	24.7153	+6σ	22.9321	22.9321	22.8911	23.0257	22.5542	24.6517	24.7475	24.6943	24.7767	24.7064
1106	9	Q9D0R2	Tars	5	5	19.1732	16.476	4.46168e-08	6.48548	6.48548	KO_1Way up vs WT_12mo	5.21477	8.06583	2.69721	Tars	Tars	threonyl-tRNA synthetase	Tars	110960	110960	15 A1|15 5.6 cM	protein-coding	17.8246	16.476	19.1732	> +6σ	16.434	16.4146	16.2444	16.6002	16.6869	19.1426	18.9476	19.4433	19.4197	18.913
650	10	P14142	Slc2a4	5	5	23.446	22.4811	2.2351e-07	1.95193	1.95193	KO_1Way up vs WT_12mo	1.77351	2.14831	0.964905	Slc2a4	Slc2a4	solute carrier family 2 (facilitated glucose transporter), member 4	Slc2a4	20528	20528	11 B3|11 42.93 cM	protein-coding	22.9636	22.4811	23.446	+3σ	22.4397	22.3862	22.6504	22.4489	22.4804	23.3162	23.5171	23.4871	23.3925	23.5171
415	11	P50446	Krt6a	5	5	23.0636	25.4951	6.38607e-07	0.185376	-5.39445	KO_1Way down vs WT_12mo	-7.1132	-4.091	-2.43148	Krt6a	Krt6a	keratin 6A	Krt6a	16687	16687	15 F2|15 56.97 cM	protein-coding	24.2794	23.0636	25.4951	≤ -6σ	26.1562	25.311	25.2842	25.3799	25.3443	23.043	23.0483	23.1997	22.906	23.1212
249	12	P70296	Pebp1	5	5	25.5378	24.7379	4.36809e-06	1.74103	1.74103	KO_1Way up vs WT_12mo	1.54874	1.9572	0.799943	Pebp1	Pebp1	phosphatidylethanolamine binding protein 1	Pebp1	23980	23980	5 F|5 56.88 cM	protein-coding	25.1379	24.7379	25.5378	+3σ	24.5425	24.6961	24.7595	24.7362	24.9552	25.5361	25.5832	25.5692	25.5832	25.4174
271	13	O55111	Dsg2	5	5	22.7692	22.1503	6.66641e-06	1.53567	1.53567	KO_1Way up vs WT_12mo	1.39541	1.69002	0.618864	Dsg2	Dsg2	desmoglein 2	Dsg2	13511	13511	18 A2|18 11.42 cM	protein-coding	22.4597	22.1503	22.7692	+2σ	22.0539	22.3202	22.0763	22.0974	22.2039	22.7248	22.7048	22.8094	22.8823	22.7248
424	14	E9Q0S6	Tns1	5	5	23.7724	22.9748	6.70441e-06	1.73819	1.73819	KO_1Way up vs WT_12mo	1.5362	1.96673	0.797584	Tns1	Tns1	tensin 1	Tns1	21961	21961	1 C3|1 38.17 cM	protein-coding	23.3736	22.9748	23.7724	+3σ	22.9595	22.7059	23.0831	23.0078	23.1178	23.691	23.769	23.7551	23.7961	23.8508
1584	15	Q8BX02	Kank2	5	5	19.7744	20.6362	7.78659e-06	0.55026	-1.81732	KO_1Way down vs WT_12mo	-2.08243	-1.58597	-0.861814	Kank2	Kank2	KN motif and ankyrin repeat domains 2	Kank2	235041	235041	9|9 A3	protein-coding	20.2053	19.7744	20.6362	-3σ	20.4967	20.6161	20.746	20.605	20.7172	19.9437	19.78	19.8916	19.5268	19.7299
1421	16	Q8K1B8	Fermt3	5	5	18.7449	17.8292	1.2247e-05	1.88638	1.88638	KO_1Way up vs WT_12mo	1.61755	2.19988	0.915617	Fermt3	Fermt3	fermitin family member 3	Fermt3	108101	108101	19|19 A	protein-coding	18.2871	17.8292	18.7449	+3σ	18.0917	17.7335	17.9658	17.7231	17.6321	18.827	18.5906	18.7603	18.827	18.7194
904	17	P35293	Rab18	5	5	20.0442	19.1097	1.46502e-05	1.91122	1.91122	KO_1Way up vs WT_12mo	1.6274	2.24454	0.934497	Rab18	Rab18	RAB18, member RAS oncogene family	Rab18	19330	19330	18 A1|18 4.53 cM	protein-coding	19.577	19.1097	20.0442	+3σ	19.0636	19.3928	18.9819	19.0551	19.0551	20.3171	19.984	19.9605	20.0262	19.9332
808	18	P01655	Igkv3-2	5	5	18.4971	20.0582	1.46508e-05	0.338902	-2.9507	KO_1Way down vs WT_12mo	-3.8597	-2.25579	-1.56106	Igkv3-2	Igkv3-2	immunoglobulin kappa variable 3-2	Igkv3-2	626583	626583	6|6 C1	other	19.2777	18.4971	20.0582	-6σ	19.8219	19.9814	19.7943	20.6371	20.0562	18.302	18.384	18.4982	18.646	18.6554
816	19	Q99J39	Mlycd	5	5	18.0241	18.93	1.87027e-05	0.533703	-1.8737	KO_1Way down vs WT_12mo	-2.2012	-1.59493	-0.90589	Mlycd	Mlycd	malonyl-CoA decarboxylase	Mlycd	56690	56690	8|8 E1	protein-coding	18.477	18.0241	18.93	-3σ	18.7095	18.8775	19.0551	19.0393	18.9686	18.0633	18.2025	18.172	17.8584	17.8242
1635	20	Q8R3E3	Wipi1	5	5	17.4601	16.7285	2.26115e-05	1.66052	1.66052	KO_1Way up vs WT_12mo	1.45298	1.8977	0.731636	Wipi1	Wipi1	WD repeat domain, phosphoinositide interacting 1	Wipi1	52639	52639	11 E1|11 72.18 cM	protein-coding	17.0943	16.7285	17.4601	+3σ	16.7744	16.9366	16.5563	16.6973	16.6777	17.3753	17.64	17.532	17.3428	17.4105
1387	21	P99027	Rplp2	5	5	19.8608	20.6132	2.60301e-05	0.593609	-1.68461	KO_1Way down vs WT_12mo	-1.93771	-1.46457	-0.752415	Rplp2	Rplp2	ribosomal protein, large P2	Rplp2	67186	67186	7|7 F5	protein-coding	20.237	19.8608	20.6132	-3σ	20.5402	20.7997	20.7068	20.5889	20.4305	19.9657	19.7744	19.9244	19.9693	19.6704
498	22	Q6IFX2	Krt42	5	5	18.9549	21.7973	3.02933e-05	0.139433	-7.17191	KO_1Way down vs WT_12mo	-12.3059	-4.17981	-2.84236	Krt42	Krt42	keratin 42	Krt42	68239	68239	11|11 D	protein-coding	20.3761	18.9549	21.7973	≤ -6σ	23.1178	21.5986	21.5341	21.4677	21.2682	19.0692	18.8033	18.9649	18.9214	19.0158
531	23	Q9QWL7	Krt17	5	5	21.6285	24.8778	3.0781e-05	0.105164	-9.50897	KO_1Way down vs WT_12mo	-17.6511	-5.12267	-3.24929	Krt17	Krt17	keratin 17	Krt17	16667	16667	11 D|11 63.44 cM	protein-coding	23.2532	21.6285	24.8778	≤ -6σ	26.4177	24.4996	24.5147	24.4729	24.4841	21.5464	21.7489	21.6902	21.5867	21.5703
1208	24	A0A075B5N4	Igkv8-27	5	5	18.4835	20.4296	3.5057e-05	0.259522	-3.85323	KO_1Way down vs WT_12mo	-5.61862	-2.64253	-1.94607	Igkv8-27	Igkv8-27	immunoglobulin kappa chain variable 8-27	Igkv8-27	434041	434041	6|6 C1	other	19.4566	18.4835	20.4296	-6σ	20.2837	20.3927	20.1821	21.0564	20.2332	17.9598	19.0478	18.4476	18.4354	18.5271
1144	25	Q9CR16	Ppid	5	5	18.7106	19.7321	4.42414e-05	0.492594	-2.03007	KO_1Way down vs WT_12mo	-2.49065	-1.65467	-1.02153	Ppid	Ppid	peptidylprolyl isomerase D (cyclophilin D)	Ppid	67738	67738	3|3 E3	protein-coding	19.2214	18.7106	19.7321	-3σ	19.7382	19.9637	19.3963	19.7207	19.8416	18.9037	18.4643	18.8887	18.5732	18.7231
489	26	Q8R5L1	C1qbp	5	5	23.8506	23.0152	5.74342e-05	1.7844	1.7844	KO_1Way up vs WT_12mo	1.50029	2.1223	0.835436	C1qbp	C1qbp	complement component 1, q subcomponent binding protein	C1qbp	12261	12261	11 B4|11 43.21 cM	protein-coding	23.4329	23.0152	23.8506	+3σ	22.6817	23.1178	22.9206	23.1779	23.1779	23.8587	23.8354	23.9973	23.8814	23.6801
1412	27	P12787	Cox5a	5	5	20.1866	21.1711	5.98127e-05	0.505412	-1.97858	KO_1Way down vs WT_12mo	-2.43004	-1.611	-0.984469	Cox5a	Cox5a	cytochrome c oxidase subunit 5A	Cox5a	12858	12858	9|9 B	protein-coding	20.6789	20.1866	21.1711	-3σ	20.9734	21.4641	21.2256	21.0733	21.1192	20.1466	19.8812	20.452	20.1219	20.3315
1266	28	F8WJE0	Samhd1	5	5	17.4103	18.4626	7.18191e-05	0.482199	-2.07383	KO_1Way down vs WT_12mo	-2.59817	-1.65531	-1.0523	Samhd1	Samhd1	SAM domain and HD domain, 1	Samhd1	56045	56045	2|2 H1	protein-coding	17.9365	17.4103	18.4626	-3σ	18.5023	18.522	18.5679	18.3792	18.3416	17.2995	17.1316	17.6329	17.1724	17.8151
595	29	P56959	Fus	5	5	20.5521	20.201	8.11399e-05	1.27557	1.27557	KO_1Way up vs WT_12mo	1.1816	1.37702	0.351144	Fus	Fus	fused in sarcoma	Fus	233908	233908	7|7 F3	protein-coding	20.3766	20.201	20.5521	+1σ	20.0673	20.249	20.1596	20.2893	20.2396	20.6181	20.6039	20.5522	20.4745	20.5119
1251	30	Q9CR60	Golt1b	5	5	20.4407	19.5075	9.37837e-05	1.90958	1.90958	KO_1Way up vs WT_12mo	1.55159	2.35017	0.933254	Golt1b	Golt1b	golgi transport 1B	Golt1b	66964	66964	6|6 G2	protein-coding	19.9741	19.5075	20.4407	+3σ	19.2895	19.8523	19.5136	19.3443	19.5376	20.3381	20.6799	20.5602	20.193	20.4323
1513	31	P04104	Krt1	5	5	20.173	21.406	0.000128504	0.425422	-2.35061	KO_1Way down vs WT_12mo	-3.13178	-1.76428	-1.23303	Krt1	Krt1	keratin 1	Krt1	16678	16678	15 F2|15 57.06 cM	protein-coding	20.7895	20.173	21.406	-6σ	22.0262	21.3288	21.3703	21.1592	21.1457	20.1846	20.4604	20.1573	20.0119	20.0507
770	32	A0A075B5V0	Ighv1-26	5	5	21.0971	19.0027	0.000150016	4.27042	4.27042	KO_1Way up vs WT_12mo	2.59438	7.02925	2.09438	Ighv1-26	Ighv1-26	immunoglobulin heavy variable 1-26	Ighv1-26	629884	629884	12|12 F2	other	20.0499	19.0027	21.0971	+6σ	18.7794	18.8927	19.8937	18.7794	18.6682	21.8006	20.7603	21.2082	21.1677	20.5485
1234	33	P55258	Rab8a	5	5	17.1249	18.0735	0.000165603	0.518145	-1.92996	KO_1Way down vs WT_12mo	-2.42656	-1.53499	-0.948571	Rab8a	Rab8a	RAB8A, member RAS oncogene family	Rab8a	17274	17274	8 B3.3|8 34.84 cM	protein-coding	17.5992	17.1249	18.0735	-3σ	18.4549	17.8472	18.1918	18.1642	17.7094	17.1554	16.9667	17.2775	17.0441	17.181
1017	34	O55234	Psmb5	5	5	19.916	20.4801	0.000237148	0.676356	-1.47851	KO_1Way down vs WT_12mo	-1.7067	-1.28084	-0.564146	Psmb5	Psmb5	proteasome (prosome, macropain) subunit, beta type 5	Psmb5	19173	19173	14 C2|14 27.86 cM	protein-coding	20.198	19.916	20.4801	-2σ	20.6312	20.5056	20.5103	20.3404	20.4132	20.1279	19.9109	19.831	20.0183	19.6918
445	35	P28474	Adh5	5	5	22.7708	22.4454	0.000245809	1.25302	1.25302	KO_1Way up vs WT_12mo	1.15295	1.36176	0.325405	Adh5	Adh5	alcohol dehydrogenase 5 (class III), chi polypeptide	Adh5	11532	11532	3|3 G3	protein-coding	22.6081	22.4454	22.7708	+1σ	22.344	22.4117	22.497	22.4893	22.4851	22.8094	22.7556	22.8606	22.6131	22.8155
352	36	Q9QZF2	Gpc1	5	5	22.4316	22.8924	0.000252638	0.726613	-1.37625	KO_1Way down vs WT_12mo	-1.54911	-1.22268	-0.460741	Gpc1	Gpc1	glypican 1	Gpc1	14733	14733	1|1 D	protein-coding	22.662	22.4316	22.8924	-2σ	22.7976	22.9426	22.9731	22.847	22.9016	22.2801	22.3775	22.3248	22.5477	22.6282
870	37	Q9DB27	Mcts1	5	5	18.0462	18.7159	0.000301331	0.628667	-1.59067	KO_1Way down vs WT_12mo	-1.89776	-1.33327	-0.669633	Mcts1	Mcts1	malignant T cell amplified sequence 1	Mcts1	68995	68995	X|X A3.3	protein-coding	18.381	18.0462	18.7159	-2σ	18.7594	18.5298	18.9301	18.4972	18.863	18.0972	18.1238	17.8527	18.2268	17.9308
807	38	O55029	Copb2	5	5	21.0509	20.549	0.000391685	1.4161	1.4161	KO_1Way up vs WT_12mo	1.23404	1.62503	0.501925	Copb2	Copb2	coatomer protein complex, subunit beta 2 (beta prime)	Copb2	50797	50797	9|9 E3.3	protein-coding	20.7999	20.549	21.0509	+2σ	20.5231	20.3848	20.4782	20.7276	20.6312	21.2785	21.0103	20.902	21.0144	21.0494
1084	39	P03903	ND4L	5	5	18.9255	19.3716	0.000418557	0.734023	-1.36235	KO_1Way down vs WT_12mo	-1.54151	-1.20402	-0.446102	ND4L	ND4L	NADH dehydrogenase subunit 4L	mt-Nd4l	17720	17720	-	protein-coding	19.1486	18.9255	19.3716	-2σ	19.6203	19.2404	19.3025	19.4382	19.2565	19.0058	18.9649	18.827	18.913	18.9167
1032	40	Q9Z2U1	Psma5	5	5	20.1355	19.4282	0.0005608	1.63272	1.63272	KO_1Way up vs WT_12mo	1.33032	2.00386	0.707278	Psma5	Psma5	proteasome subunit alpha 5	Psma5	26442	26442	3|3 F3	protein-coding	19.7818	19.4282	20.1355	+2σ	19.3295	19.3963	19.1923	19.3882	19.8349	20.1536	20.3522	20.193	19.9605	20.0183
1259	41	Q9EQU5	Set	5	5	19.193	18.659	0.000589619	1.44787	1.44787	KO_1Way up vs WT_12mo	1.23895	1.69201	0.53393	Set	Set	SET nuclear oncogene	Set	56086	56086	2|2 B	protein-coding	18.926	18.659	19.193	+2σ	18.3524	18.5806	18.7394	18.8741	18.7487	19.2654	19.1115	19.1813	19.2952	19.1115
1378	42	Q9D6K8	Fundc2	5	5	23.2908	23.4772	0.000596079	0.878834	-1.13787	KO_1Way down vs WT_12mo	-1.20157	-1.07755	-0.186337	Fundc2	Fundc2	FUN14 domain containing 2	Fundc2	67391	67391	X|X A7.3	protein-coding	23.384	23.2908	23.4772	-1σ	23.5117	23.4828	23.4757	23.447	23.4687	23.1645	23.3026	23.3232	23.3162	23.3477
64	43	P07310	Ckm	5	5	28.542	28.2868	0.000707605	1.19349	1.19349	KO_1Way up vs WT_12mo	1.10547	1.28852	0.255184	Ckm	Ckm	creatine kinase, muscle	Ckm	12715	12715	7 A3|7 9.67 cM	protein-coding	28.4144	28.2868	28.542	+1σ	28.2768	28.227	28.249	28.249	28.432	28.5855	28.5855	28.4311	28.5855	28.5222
916	44	A0A087WNT1	Eloc	5	5	18.9378	19.7911	0.00072696	0.553518	-1.80663	KO_1Way down vs WT_12mo	-2.33667	-1.39682	-0.853299	Eloc	Eloc	elongin C	Eloc	67923	67923	1|1 A3	protein-coding	19.3645	18.9378	19.7911	-3σ	19.3793	19.9365	20.0384	19.7725	19.8286	19.0191	18.6872	19.1626	19.1774	18.6425
1169	45	D3Z7P3	Gls	5	5	17.704	17.0913	0.000753883	1.52913	1.52913	KO_1Way up vs WT_12mo	1.26987	1.84132	0.612714	Gls	Gls	glutaminase	Gls	14660	14660	1 C1.1|1 26.86 cM	protein-coding	17.3976	17.0913	17.704	+2σ	16.7956	16.9228	17.4524	17.1548	17.1308	17.7591	17.749	17.7046	17.7178	17.5895
350	46	Q8QZS1	Hibch	5	5	23.0309	23.4706	0.000789776	0.737289	-1.35632	KO_1Way down vs WT_12mo	-1.55127	-1.18587	-0.439699	Hibch	Hibch	3-hydroxyisobutyryl-Coenzyme A hydrolase	Hibch	227095	227095	1|1 C1.1	protein-coding	23.2508	23.0309	23.4706	-2σ	23.3804	23.2926	23.6241	23.6825	23.3735	22.9486	22.9769	23.006	23.1212	23.1018
1918	47	E9Q2S9	Ccdc43	5	5	19.9148	19.3901	0.000816928	1.43871	1.43871	KO_1Way up vs WT_12mo	1.22459	1.69027	0.524777	Ccdc43	Ccdc43	coiled-coil domain containing 43	Ccdc43	52715	52715	11 E1|11 66.48 cM	protein-coding	19.6525	19.3901	19.9148	+2σ	19.6351	19.1408	19.1734	19.447	19.5541	19.869	19.8953	19.9332	19.9332	19.9437
1620	48	G3XA17	Eif4g2	5	5	16.6604	15.9151	0.001184	1.67629	1.67629	KO_1Way up vs WT_12mo	1.31495	2.13694	0.745274	Eif4g2	Eif4g2	eukaryotic translation initiation factor 4, gamma 2	Eif4g2	13690	13690	7 E3|7 58.0 cM	protein-coding	16.2877	15.9151	16.6604	+3σ	16.0391	16.3033	15.6021	15.8695	15.7617	16.8629	16.4977	16.9028	16.4658	16.5728
722	49	P63085	Mapk1	5	5	18.8092	18.5154	0.00130417	1.22588	1.22588	KO_1Way up vs WT_12mo	1.1123	1.35105	0.293814	Mapk1	Mapk1	mitogen-activated protein kinase 1	Mapk1	26413	26413	16 A3|16 10.53 cM	protein-coding	18.6623	18.5154	18.8092	+1σ	18.6682	18.3954	18.5835	18.4426	18.4872	18.7804	18.8094	18.6919	18.8703	18.8939
61	50	P31001	Des	5	5	28.8974	29.0701	0.00130554	0.887179	-1.12717	KO_1Way down vs WT_12mo	-1.19347	-1.06455	-0.172703	Des	Des	desmin	Des	13346	13346	1 C4|1 38.85 cM	protein-coding	28.9838	28.8974	29.0701	-1σ	29.0872	29.0872	29.0017	29.0872	29.0872	28.8359	28.8359	28.9319	29.001	28.8824
1035	51	Q9DCV4	Rmdn1	5	5	24.3054	23.9798	0.00131386	1.25322	1.25322	KO_1Way up vs WT_12mo	1.12505	1.39599	0.325639	Rmdn1	Rmdn1	regulator of microtubule dynamics 1	Rmdn1	66302	66302	4|4 A3	protein-coding	24.1426	23.9798	24.3054	+1σ	23.7982	24.1697	24.0491	23.9534	23.9285	24.3252	24.3669	24.2266	24.3465	24.2619
28	52	Q8BMS1	Hadha	5	5	28.2305	28.4541	0.00141461	0.856454	-1.1676	KO_1Way down vs WT_12mo	-1.2585	-1.08328	-0.223552	Hadha	Hadha	hydroxyacyl-CoA dehydrogenase trifunctional multienzyme complex subunit alpha	Hadha	97212	97212	5|5 B1	protein-coding	28.3423	28.2305	28.4541	-1σ	28.5229	28.3371	28.3775	28.4798	28.5532	28.2485	28.207	28.207	28.3058	28.1844
1903	53	Q3URD3	Slmap	5	5	14.9954	16.7987	0.00143472	0.286522	-3.49013	KO_1Way down vs WT_12mo	-6.39827	-1.9038	-1.80328	Slmap	Slmap	sarcolemma associated protein	Slmap	83997	83997	14|14 A3	protein-coding	15.8971	14.9954	16.7987	-6σ	16.8082	16.7956	16.9526	16.8367	16.6002	15.7375	13.6565	14.8463	15.079	15.6576
671	54	B7ZCF1	Psmc3	5	5	21.7529	21.5035	0.00155422	1.18874	1.18874	KO_1Way up vs WT_12mo	1.09193	1.29413	0.249433	Psmc3	Psmc3	proteasome (prosome, macropain) 26S subunit, ATPase 3	Psmc3	19182	19182	2 E1|2 50.44 cM	protein-coding	21.6282	21.5035	21.7529	+1σ	21.5535	21.5199	21.5095	21.3361	21.5986	21.7778	21.8439	21.68	21.7045	21.7585
726	55	Q06890	Clu	5	5	23.4876	23.2208	0.00155597	1.20315	1.20315	KO_1Way up vs WT_12mo	1.09863	1.31762	0.266822	Clu	Clu	clusterin	Clu	12759	12759	14 D1|14 34.36 cM	protein-coding	23.3542	23.2208	23.4876	+1σ	23.2372	23.096	23.1492	23.3179	23.3038	23.5024	23.589	23.4077	23.3994	23.5397
1015	56	P32020	Scp2	5	5	21.4498	21.8522	0.00156798	0.7566	-1.3217	KO_1Way down vs WT_12mo	-1.51612	-1.15221	-0.402397	Scp2	Scp2	sterol carrier protein 2, liver	Scp2	20280	20280	4 C7|4 50.2 cM	protein-coding	21.651	21.4498	21.8522	-2σ	21.8416	21.9223	21.9137	21.9546	21.6287	21.4944	21.4343	21.218	21.5804	21.5218
428	57	Q60864	Stip1	5	5	22.7335	22.5762	0.0016769	1.11523	1.11523	KO_1Way up vs WT_12mo	1.05633	1.17742	0.157347	Stip1	Stip1	stress-induced phosphoprotein 1	Stip1	20867	20867	19|19 A	protein-coding	22.6548	22.5762	22.7335	+0.5σ	22.5592	22.6076	22.565	22.5792	22.57	22.8446	22.6566	22.7306	22.7556	22.6802
2037	58	G3X9N2	Grxcr1	5	5	18.2935	17.4479	0.00171751	1.797	1.797	KO_1Way up vs WT_12mo	1.34092	2.40819	0.845587	Grxcr1	Grxcr1	glutaredoxin, cysteine rich 1	Grxcr1	433899	433899	5 C3.1|5 36.59 cM	protein-coding	17.8707	17.4479	18.2935	+3σ	17.2324	18.1024	17.1087	17.4313	17.3646	18.3531	18.4213	18.0633	18.3175	18.3121
622	59	P10605	Ctsb	5	5	21.9973	22.3014	0.00188344	0.809949	-1.23465	KO_1Way down vs WT_12mo	-1.37396	-1.10946	-0.304098	Ctsb	Ctsb	cathepsin B	Ctsb	13030	13030	14 D1|14 33.24 cM	protein-coding	22.1493	21.9973	22.3014	-1σ	22.4265	22.2408	22.1583	22.4721	22.209	22.0312	21.9377	22.0312	21.9377	22.0484
596	60	Q9Z2K1	Krt16	5	5	17.6699	21.0182	0.00191254	0.098189	-10.1844	KO_1Way down vs WT_12mo	-33.1513	-3.12878	-3.3483	Krt16	Krt16	keratin 16	Krt16	16666	16666	11|11 D	protein-coding	19.344	17.6699	21.0182	≤ -6σ	23.9285	20.074	20.5435	20.2837	20.2615	17.5478	17.8477	17.749	17.8701	17.335
588	61	Q9QUR6	Prep	5	5	21.4797	20.9625	0.00197576	1.43118	1.43118	KO_1Way up vs WT_12mo	1.19148	1.71909	0.517201	Prep	Prep	prolyl endopeptidase	Prep	19072	19072	10 B2|10 23.27 cM	protein-coding	21.2211	20.9625	21.4797	+2σ	20.9532	20.8497	20.8221	20.8854	21.3019	21.6384	21.5951	21.5078	21.218	21.4391
930	62	Q64010	Crk	5	5	19.3526	19.6766	0.0020031	0.798844	-1.25181	KO_1Way down vs WT_12mo	-1.40451	-1.11571	-0.324015	Crk	Crk	v-crk avian sarcoma virus CT10 oncogene homolog	Crk	12928	12928	11 B5|11 45.92 cM	protein-coding	19.5146	19.3526	19.6766	-1σ	19.6136	19.751	19.6949	19.5852	19.7382	19.2763	19.4667	19.1365	19.4288	19.4547
762	63	Q62165	Dag1	5	5	21.5522	20.9885	0.00225091	1.47799	1.47799	KO_1Way up vs WT_12mo	1.205	1.81283	0.563636	Dag1	Dag1	dystroglycan 1	Dag1	13138	13138	9 F1- F2|9 59.08 cM	protein-coding	21.2704	20.9885	21.5522	+2σ	20.8403	21.1649	20.9119	21.0818	20.9438	21.7853	21.4944	21.6876	21.6541	21.1395
275	64	P23953	Ces1c	5	5	24.0052	23.6415	0.00226145	1.28665	1.28665	KO_1Way up vs WT_12mo	1.12772	1.46798	0.363624	Ces1c	Ces1c	carboxylesterase 1C	Ces1c	13884	13884	8 C5|8 44.99 cM	protein-coding	23.8234	23.6415	24.0052	+2σ	23.4828	23.4417	23.7646	23.7403	23.7784	24.0996	23.8872	24.0047	23.9714	24.063
1239	65	P47811	Mapk14	5	5	18.7179	19.0102	0.00260537	0.816595	-1.2246	KO_1Way down vs WT_12mo	-1.36505	-1.09859	-0.292307	Mapk14	Mapk14	mitogen-activated protein kinase 14	Mapk14	26416	26416	17 A3.3|17 14.85 cM	protein-coding	18.864	18.7179	19.0102	-1σ	18.8826	19.1305	19.0107	18.9767	19.0505	18.6919	18.646	18.5732	18.8751	18.8033
742	66	A2AQR0	Gpd2	5	5	19.9743	20.4537	0.00263226	0.717273	-1.39417	KO_1Way down vs WT_12mo	-1.66645	-1.16638	-0.479406	Gpd2	Gpd2	glycerol phosphate dehydrogenase 2, mitochondrial	Gpd2	14571	14571	2 C1.1|2 31.66 cM	protein-coding	20.214	19.9743	20.4537	-2σ	20.2396	20.5469	20.5681	20.5575	20.3567	19.8447	19.929	19.7362	20.1965	20.1653
2010	67	Q99KH8	Stk24	5	5	16.5206	15.7386	0.00265511	1.71949	1.71949	KO_1Way up vs WT_12mo	1.2848	2.30125	0.781978	Stk24	Stk24	serine/threonine kinase 24	Stk24	223255	223255	14 E5|14 64.95 cM	protein-coding	16.1296	15.7386	16.5206	+3σ	16.1147	15.9543	15.8878	15.1628	15.5733	16.7106	16.4154	16.3186	16.5572	16.601
414	68	F8WJ05	Itih1	5	5	22.0604	21.7946	0.00273995	1.20237	1.20237	KO_1Way up vs WT_12mo	1.08835	1.32833	0.265879	Itih1	Itih1	inter-alpha trypsin inhibitor, heavy chain 1	Itih1	16424	16424	14|14 B	protein-coding	21.9275	21.7946	22.0604	+1σ	21.7687	21.6739	21.8731	21.9027	21.7543	22.1715	21.8913	22.0568	22.0998	22.0827
62	69	P50544	Acadvl	5	5	26.8443	27.0658	0.0028528	0.857712	-1.16589	KO_1Way down vs WT_12mo	-1.26749	-1.07244	-0.221434	Acadvl	Acadvl	acyl-Coenzyme A dehydrogenase, very long chain	Acadvl	11370	11370	11 B3|11 42.96 cM	protein-coding	26.955	26.8443	27.0658	-1σ	27.1358	27.0903	26.9783	27.0711	27.0533	26.8984	26.707	26.9257	26.9257	26.7651
128	70	P62631	Eef1a2	5	5	27.3738	27.4455	0.00290309	0.951541	-1.05093	KO_1Way down vs WT_12mo	-1.07982	-1.02281	-0.0716616	Eef1a2	Eef1a2	eukaryotic translation elongation factor 1 alpha 2	Eef1a2	13628	13628	2 H4|2 103.6 cM	protein-coding	27.4096	27.3738	27.4455	-0.5σ	27.4997	27.4411	27.4411	27.4228	27.4228	27.3968	27.3586	27.3968	27.3586	27.3586
326	71	Q8VDQ1	Ptgr2	5	5	22.4902	22.4188	0.00311405	1.05074	1.05074	KO_1Way up vs WT_12mo	1.02238	1.07988	0.0714037	Ptgr2	Ptgr2	prostaglandin reductase 2	Ptgr2	77219	77219	12|12 D1	protein-coding	22.4545	22.4188	22.4902	+0.5σ	22.4317	22.396	22.4265	22.3785	22.4614	22.5026	22.5075	22.4792	22.5026	22.4593
311	72	J9JIB2	Obscn	5	5	19.069	19.9231	0.0032962	0.553216	-1.80761	KO_1Way down vs WT_12mo	-2.51561	-1.29887	-0.854085	Obscn	Obscn	obscurin, cytoskeletal calmodulin and titin-interacting RhoGEF	Obscn	380698	380698	11|11 B1.3	protein-coding	19.4961	19.069	19.9231	-3σ	20.5681	19.8718	19.8039	19.6098	19.762	19.2423	19.0752	19.2249	19.2075	18.5951
562	73	P42227	Stat3	5	5	21.9028	21.5158	0.00338461	1.30768	1.30768	KO_1Way up vs WT_12mo	1.12501	1.52001	0.387007	Stat3	Stat3	signal transducer and activator of transcription 3	Stat3	20848	20848	11 D|11 63.82 cM	protein-coding	21.7093	21.5158	21.9028	+2σ	21.3361	21.4365	21.4365	21.6962	21.6739	21.8867	21.6902	22.0484	21.9927	21.8962
1142	74	Q9Z0N1	Eif2s3x	5	5	18.3376	19.2669	0.00354757	0.525113	-1.90435	KO_1Way down vs WT_12mo	-2.74136	-1.3229	-0.9293	Eif2s3x	Eif2s3x	eukaryotic translation initiation factor 2, subunit 3, structural gene X-linked	Eif2s3x	26905	26905	X C3|X 41.52 cM	protein-coding	18.8023	18.3376	19.2669	-3σ	19.4098	19.5136	18.5298	19.246	19.6351	18.2607	18.7194	18.1097	18.4884	18.1097
349	75	P48758	Cbr1	5	5	23.7498	23.5025	0.00364792	1.18701	1.18701	KO_1Way up vs WT_12mo	1.0768	1.30849	0.247329	Cbr1	Cbr1	carbonyl reductase 1	Cbr1	12408	12408	16 C4|16 54.53 cM	protein-coding	23.6261	23.5025	23.7498	+1σ	23.6407	23.4757	23.447	23.325	23.6241	23.7385	23.7286	23.7769	23.709	23.7961
1704	76	O70252	Hmox2	5	5	18.926	18.1947	0.00370479	1.66012	1.66012	KO_1Way up vs WT_12mo	1.24357	2.2162	0.73129	Hmox2	Hmox2	heme oxygenase 2	Hmox2	15369	15369	16 A1|16 2.46 cM	protein-coding	18.5603	18.1947	18.926	+3σ	18.0874	18.2017	17.7876	18.1416	18.755	19.2249	19.0058	18.8466	18.6977	18.8548
1480	77	Q8K4G1	Ltbp4	5	5	18.0931	17.5197	0.00370528	1.48806	1.48806	KO_1Way up vs WT_12mo	1.18641	1.86641	0.573431	Ltbp4	Ltbp4	latent transforming growth factor beta binding protein 4	Ltbp4	108075	108075	7|7 A3	protein-coding	17.8064	17.5197	18.0931	+2σ	17.4192	17.2269	17.6242	17.4093	17.9189	18.0451	18.2494	17.9722	18.302	17.897
563	78	Q02248	Ctnnb1	5	5	20.8762	20.3167	0.00383301	1.47374	1.47374	KO_1Way up vs WT_12mo	1.1799	1.84075	0.559481	Ctnnb1	Ctnnb1	catenin (cadherin associated protein), beta 1	Ctnnb1	12387	12387	9 F4|9 72.19 cM	protein-coding	20.5965	20.3167	20.8762	+2σ	20.2275	20.6572	19.9975	20.5283	20.1731	20.622	20.8424	20.9759	21.0058	20.9347
14	79	P56480	Atp5b	5	5	31.0467	31.2507	0.00390817	0.868115	-1.15192	KO_1Way down vs WT_12mo	-1.24958	-1.06189	-0.204042	Atp5b	Atp5b	ATP synthase, H+ transporting mitochondrial F1 complex, beta subunit	Atp5b	11947	11947	10|10 D3	protein-coding	31.1487	31.0467	31.2507	-1σ	31.3016	31.3016	31.047	31.3016	31.3016	31.0467	31.0467	31.0467	31.0467	31.0467
1116	80	Q8JZQ9	Eif3b	5	5	20.1521	19.6806	0.00396454	1.38649	1.38649	KO_1Way up vs WT_12mo	1.14828	1.67412	0.471436	Eif3b	Eif3b	eukaryotic translation initiation factor 3, subunit B	Eif3b	27979	27979	5 G2|5 78.97 cM	protein-coding	19.9164	19.6806	20.1521	+2σ	19.4228	19.8588	19.5191	19.712	19.8903	20.2591	20.2296	20.28	19.8812	20.1103
1289	81	Q8BGD9	Eif4b	5	5	16.1681	15.5436	0.00401286	1.54169	1.54169	KO_1Way up vs WT_12mo	1.20035	1.98009	0.624513	Eif4b	Eif4b	eukaryotic translation initiation factor 4B	Eif4b	75705	75705	15|15 F2	protein-coding	15.8559	15.5436	16.1681	+2σ	15.7989	15.3033	15.2761	15.7094	15.6302	16.3707	16.2895	16.3959	15.9145	15.8699
346	82	Q791V5	Mtch2	5	5	24.2841	24.1018	0.00401391	1.13467	1.13467	KO_1Way up vs WT_12mo	1.05474	1.22065	0.182269	Mtch2	Mtch2	mitochondrial carrier 2	Mtch2	56428	56428	2|2 E1	protein-coding	24.1929	24.1018	24.2841	+0.5σ	24.0822	24.1861	24.1254	24.1337	23.9815	24.2471	24.2163	24.3044	24.2619	24.3906
856	83	P54822	Adsl	5	5	20.5826	20.2112	0.00434304	1.29363	1.29363	KO_1Way up vs WT_12mo	1.11235	1.50446	0.371425	Adsl	Adsl	adenylosuccinate lyase	Adsl	11564	11564	15 E1|15 37.95 cM	protein-coding	20.3969	20.2112	20.5826	+2σ	20.1453	20.0943	20.4557	20.0521	20.3086	20.4604	20.6546	20.7514	20.5946	20.452
1095	84	Q922Q1	Mtarc2	5	5	18.4879	18.2384	0.00443527	1.18874	1.18874	KO_1Way up vs WT_12mo	1.07371	1.3161	0.249432	Mtarc2	Mtarc2	mitochondrial amidoxime reducing component 2	Mtarc2	67247	67247	1|1 H5	protein-coding	18.3632	18.2384	18.4879	+1σ	18.1024	18.1642	18.2654	18.3629	18.2973	18.4213	18.3967	18.6384	18.523	18.4599
942	85	O55222	Ilk	5	5	21.2443	20.9996	0.00443865	1.18488	1.18488	KO_1Way up vs WT_12mo	1.07226	1.30934	0.244743	Ilk	Ilk	integrin linked kinase	Ilk	16202	16202	7|7 E3	protein-coding	21.1219	20.9996	21.2443	+1σ	20.9618	20.8854	21.0975	20.9967	21.0564	21.1621	21.4146	21.2397	21.1266	21.2785
1402	86	Q9DB29	Iah1	5	5	17.6135	17.2907	0.00445853	1.25074	1.25074	KO_1Way up vs WT_12mo	1.09626	1.42698	0.322776	Iah1	Iah1	isoamyl acetate-hydrolyzing esterase 1 homolog	Iah1	67732	67732	12|12 A1.3	protein-coding	17.4521	17.2907	17.6135	+1σ	17.4313	17.1717	17.3979	17.2324	17.2204	17.526	17.7296	17.8038	17.4821	17.526
889	87	Q9WVJ3	Cpq	5	5	22.1704	22.3492	0.00448902	0.883476	-1.13189	KO_1Way down vs WT_12mo	-1.21772	-1.05211	-0.178738	Cpq	Cpq	carboxypeptidase Q	Cpq	54381	54381	15|15 B3.1	protein-coding	22.2598	22.1704	22.3492	-1σ	22.2696	22.3357	22.396	22.3486	22.396	22.2717	22.0625	22.1444	22.2493	22.1244
226	88	P62960	Ybx1	5	5	22.9838	23.2178	0.00450604	0.850303	-1.17605	KO_1Way down vs WT_12mo	-1.29421	-1.06868	-0.233952	Ybx1	Ybx1	Y box protein 1	Ybx1	22608	22608	4|4 D2.1	protein-coding	23.1008	22.9838	23.2178	-1σ	23.1717	23.3361	23.1779	23.2807	23.1225	23.1376	22.9179	23.013	22.9769	22.8737
697	89	P49722	Psma2	5	5	20.8877	20.5974	0.00452036	1.22286	1.22286	KO_1Way up vs WT_12mo	1.08583	1.37718	0.290262	Psma2	Psma2	proteasome subunit alpha 2	Psma2	19166	19166	13|13 A1	protein-coding	20.7426	20.5974	20.8877	+1σ	20.6682	20.459	20.697	20.5103	20.6527	21.0217	20.8039	21.0329	20.7715	20.8085
1345	90	Q61699	Hsph1	5	5	17.6465	17.2553	0.00467686	1.31153	1.31153	KO_1Way up vs WT_12mo	1.11628	1.54093	0.391252	Hsph1	Hsph1	heat shock 105kDa/110kDa protein 1	Hsph1	15505	15505	5 G3|5 89.18 cM	protein-coding	17.4509	17.2553	17.6465	+2σ	17.3344	17.084	17.2324	17.1803	17.4452	17.4531	17.4604	17.8284	17.7239	17.7668
460	91	Q9WUZ7	Sh3bgr	5	5	21.0574	21.2288	0.00480976	0.887931	-1.12621	KO_1Way down vs WT_12mo	-1.2091	-1.04901	-0.17148	Sh3bgr	Sh3bgr	SH3-binding domain glutamic acid-rich protein	Sh3bgr	50795	50795	16|16 C4	protein-coding	21.1431	21.0574	21.2288	-1σ	21.2474	21.2158	21.3049	21.1561	21.2199	21.1355	20.9632	21.1112	21.1063	20.9706
344	92	E9QKR0	Gnb2	5	5	22.0604	22.4669	0.00512489	0.754429	-1.32551	KO_1Way down vs WT_12mo	-1.57164	-1.11792	-0.406543	Gnb2	Gnb2	guanine nucleotide binding protein (G protein), beta 2	Gnb2	14693	14693	5 G2|5 76.54 cM	protein-coding	22.2636	22.0604	22.4669	-2σ	22.4234	22.1991	22.4766	22.7059	22.5296	21.9641	22.109	22.2852	21.8867	22.0568
1961	93	Q60575	Kif1b	5	5	17.6845	17.1566	0.00521777	1.44179	1.44179	KO_1Way up vs WT_12mo	1.15488	1.79998	0.527866	Kif1b	Kif1b	kinesin family member 1B	Kif1b	16561	16561	4 E2|4 79.05 cM	protein-coding	17.4205	17.1566	17.6845	+2σ	17.4711	17.0123	16.9962	17.163	17.1405	17.3649	17.9144	17.6004	17.9481	17.5946
757	94	Q91VT4	Cbr4	5	5	21.0661	20.787	0.0052584	1.21346	1.21346	KO_1Way up vs WT_12mo	1.07894	1.36475	0.279125	Cbr4	Cbr4	carbonyl reductase 4	Cbr4	234309	234309	8|8 B3.1	protein-coding	20.9265	20.787	21.0661	+1σ	20.8497	20.8713	20.7386	20.6076	20.8678	20.9998	21.1266	21.0846	21.2139	20.9057
1497	95	P59266	Fitm2	5	5	16.559	17.1811	0.00528237	0.649732	-1.5391	KO_1Way down vs WT_12mo	-2.00027	-1.18425	-0.622084	Fitm2	Fitm2	fat storage-inducing transmembrane protein 2	Fitm2	228859	228859	2|2 H3	protein-coding	16.87	16.559	17.1811	-2σ	16.8367	17.3604	17.1892	17.3646	17.1548	16.7239	16.3518	16.8374	16.7386	16.1435
1586	96	Q61129	Cfi	5	5	22.6823	22.401	0.00532587	1.21529	1.21529	KO_1Way up vs WT_12mo	1.07927	1.36845	0.281302	Cfi	Cfi	complement component factor i	Cfi	12630	12630	3 G3|3 59.21 cM	protein-coding	22.5417	22.401	22.6823	+1σ	22.5353	22.3	22.5188	22.3569	22.2939	22.8155	22.6983	22.573	22.5528	22.772
878	97	Q6P5E4	Uggt1	5	5	18.5575	18.7678	0.00533152	0.864402	-1.15687	KO_1Way down vs WT_12mo	-1.2642	-1.05865	-0.210225	Uggt1	Uggt1	UDP-glucose glycoprotein glucosyltransferase 1	Uggt1	320011	320011	1|1 B	protein-coding	18.6626	18.5575	18.7678	-1σ	18.6304	18.7394	18.7594	18.8409	18.8688	18.5988	18.5988	18.6113	18.5625	18.4162
1567	98	O35226	Psmd4	5	5	17.1642	16.4146	0.00550795	1.68137	1.68137	KO_1Way up vs WT_12mo	1.22302	2.31149	0.749637	Psmd4	Psmd4	proteasome (prosome, macropain) 26S subunit, non-ATPase, 4	Psmd4	19185	19185	3 F2.1|3 40.74 cM	protein-coding	16.7894	16.4146	17.1642	+3σ	16.318	16.8869	15.9137	16.1302	16.8242	16.9536	17.2527	17.2385	17.2209	17.1554
1036	99	Q8C605	Pfkp	5	5	17.9051	17.4063	0.00606199	1.41304	1.41304	KO_1Way up vs WT_12mo	1.13898	1.75306	0.498807	Pfkp	Pfkp	phosphofructokinase, platelet	Pfkp	56421	56421	13|13 A1	protein-coding	17.6557	17.4063	17.9051	+2σ	17.3746	17.288	17.4313	17.288	17.6495	17.9977	17.532	17.9048	17.8359	18.2552
1233	100	Q8VDJ3	Hdlbp	5	5	19.6639	18.8726	0.00625506	1.7306	1.7306	KO_1Way up vs WT_12mo	1.2268	2.44131	0.791276	Hdlbp	Hdlbp	high density lipoprotein (HDL) binding protein	Hdlbp	110611	110611	1 D|1 47.24 cM	protein-coding	19.2682	18.8726	19.6639	+3σ	18.5522	18.2482	19.0972	19.4185	19.0468	19.4961	19.8187	19.6964	19.6853	19.6229
430	101	B7ZNL2	Nap1l4	5	5	22.4047	22.0065	0.00635305	1.31787	1.31787	KO_1Way up vs WT_12mo	1.10778	1.5678	0.398209	Nap1l4	Nap1l4	nucleosome assembly protein 1-like 4	Nap1l4	17955	17955	7 F5|7 88.24 cM	protein-coding	22.2056	22.0065	22.4047	+2σ	22.0052	22.0052	22.0804	21.9756	21.9661	22.5139	22.4425	21.9978	22.4472	22.6222
882	102	Q9D404	Oxsm	5	5	18.702	19.0721	0.00642608	0.773717	-1.29246	KO_1Way down vs WT_12mo	-1.51939	-1.09943	-0.370121	Oxsm	Oxsm	3-oxoacyl-ACP synthase, mitochondrial	Oxsm	71147	71147	14|14 A1	protein-coding	18.887	18.702	19.0721	-2σ	19.2793	18.863	19.1509	18.8826	19.185	18.5576	18.8644	18.5988	18.7746	18.7147
715	103	Q62159	Rhoc	5	5	14.9229	15.8812	0.006539	0.514651	-1.94307	KO_1Way down vs WT_12mo	-2.95791	-1.27641	-0.958334	Rhoc	Rhoc	ras homolog family member C	Rhoc	11853	11853	3|3 F2.2	protein-coding	15.402	14.9229	15.8812	-3σ	16.0549	16.4809	15.4702	16.0236	15.3767	14.4925	15.0335	15.2418	14.5701	15.2766
1576	104	P00158	CYTB	5	5	21.7935	21.6326	0.00665755	1.11803	1.11803	KO_1Way up vs WT_12mo	1.04159	1.20009	0.160964	CYTB	CYTB	cytochrome b	mt-Cytb	17711	17711	-	protein-coding	21.713	21.6326	21.7935	+0.5σ	21.5585	21.5173	21.6616	21.6855	21.7399	21.7585	21.7638	21.7948	21.8006	21.85
798	105	A0A0N4SVX9	Dysf	5	5	19.3421	19.8412	0.00666532	0.707544	-1.41334	KO_1Way down vs WT_12mo	-1.76051	-1.13463	-0.499108	Dysf	Dysf	dysferlin	Dysf	26903	26903	6 C3|6 36.14 cM	protein-coding	19.5917	19.3421	19.8412	-2σ	19.7318	19.5541	19.6273	20.0943	20.1986	19.4393	19.3769	19.4161	19.3041	19.1743
1023	106	F6U775	Opa1	5	5	17.824	18.3851	0.00706393	0.677761	-1.47545	KO_1Way down vs WT_12mo	-1.89395	-1.14942	-0.561152	Opa1	Opa1	OPA1, mitochondrial dynamin like GTPase	Opa1	74143	74143	16 B2|16 20.65 cM	protein-coding	18.1045	17.824	18.3851	-2σ	18.6963	18.3213	18.2758	18.6803	17.9519	17.9914	17.8758	17.7591	17.9104	17.5831
1546	107	A0A0G2JEC4	Sh3glb1	5	5	18.6156	18.3165	0.00734721	1.23033	1.23033	KO_1Way up vs WT_12mo	1.07595	1.40687	0.29905	Sh3glb1	Sh3glb1	SH3-domain GRB2-like B1 (endophilin)	Sh3glb1	54673	54673	3|3 H2	protein-coding	18.466	18.3165	18.6156	+1σ	18.2543	18.3899	18.2398	18.2597	18.4389	18.6164	18.5413	18.8983	18.5084	18.5133
492	108	Q91XE4	Acy3	5	5	22.4111	22.0854	0.00776587	1.25328	1.25328	KO_1Way up vs WT_12mo	1.08129	1.45262	0.325705	Acy3	Acy3	aspartoacylase (aminoacylase) 3	Acy3	71670	71670	19|19 A	protein-coding	22.2482	22.0854	22.4111	+1σ	22.117	21.9027	22.1013	22.0804	22.2254	22.1205	22.4836	22.4917	22.4067	22.5528
896	109	E9Q9M1	Nt5c2	5	5	19.6609	19.3459	0.00778669	1.24401	1.24401	KO_1Way up vs WT_12mo	1.07844	1.435	0.314996	Nt5c2	Nt5c2	5'-nucleotidase, cytosolic II	Nt5c2	76952	76952	19|19 C3	protein-coding	19.5034	19.3459	19.6609	+1σ	19.1162	19.3882	19.3928	19.2333	19.5993	19.7013	19.6446	19.5268	19.7082	19.7237
988	110	Q9CQN6	Tmem14c	5	5	21.3329	21.675	0.00780614	0.788865	-1.26764	KO_1Way down vs WT_12mo	-1.48049	-1.0854	-0.34215	Tmem14c	Tmem14c	transmembrane protein 14C	Tmem14c	66154	66154	13|13 A3.3	protein-coding	21.5039	21.3329	21.675	-1σ	21.9223	21.6503	21.588	21.4112	21.8033	21.2397	21.3345	21.2453	21.4425	21.4024
1165	111	Q3UIU2	Ndufb6	5	5	22.8353	22.5267	0.00782909	1.23846	1.23846	KO_1Way up vs WT_12mo	1.07661	1.42465	0.308551	Ndufb6	Ndufb6	NADH:ubiquinone oxidoreductase subunit B6	Ndufb6	230075	230075	4|4 A5	protein-coding	22.681	22.5267	22.8353	+1σ	22.4672	22.3818	22.5849	22.57	22.6296	23.1212	22.719	22.822	22.8094	22.7048
634	112	Q99JY9	Actr3	5	5	21.5713	21.3512	0.00813338	1.16481	1.16481	KO_1Way up vs WT_12mo	1.05328	1.28815	0.220095	Actr3	Actr3	ARP3 actin-related protein 3	Actr3	74117	74117	1|1 E2.3	protein-coding	21.4612	21.3512	21.5713	+1σ	21.4004	21.4004	21.2199	21.3288	21.4066	21.4624	21.4624	21.7335	21.5669	21.6313
1090	113	Q8BP40	Acp6	5	5	19.6793	19.9539	0.0081506	0.826682	-1.20966	KO_1Way down vs WT_12mo	-1.37157	-1.06686	-0.274596	Acp6	Acp6	acid phosphatase 6, lysophosphatidic	Acp6	66659	66659	3|3 F2.1	protein-coding	19.8166	19.6793	19.9539	-1σ	20.0384	20.1193	19.9586	19.7943	19.8588	19.5493	19.8654	19.6604	19.6918	19.6295
186	114	P50396	Gdi1	5	5	23.0839	22.9555	0.00835981	1.09307	1.09307	KO_1Way up vs WT_12mo	1.03042	1.15954	0.128391	Gdi1	Gdi1	guanosine diphosphate (GDP) dissociation inhibitor 1	Gdi1	14567	14567	X A7.3|X 37.97 cM	protein-coding	23.0197	22.9555	23.0839	+0.5σ	22.8761	22.9731	22.9595	22.9321	23.0369	23.0483	23.075	23.1562	23.013	23.1272
571	115	Q99KQ4	Nampt	5	5	21.9989	21.8208	0.00894021	1.13142	1.13142	KO_1Way up vs WT_12mo	1.04132	1.22932	0.178134	Nampt	Nampt	nicotinamide phosphoribosyltransferase	Nampt	59027	59027	12|12 A3	protein-coding	21.9098	21.8208	21.9989	+0.5σ	21.6503	21.868	21.846	21.7792	21.9604	22.0104	22.0104	21.9927	22.0026	21.9785
1838	116	Q9WVA3	Bub3	5	5	17.7802	18.1198	0.00897059	0.790269	-1.26539	KO_1Way down vs WT_12mo	-1.48243	-1.08013	-0.339584	Bub3	Bub3	BUB3 mitotic checkpoint protein	Bub3	12237	12237	7 F3|7 74.36 cM	protein-coding	17.95	17.7802	18.1198	-1σ	18.197	17.8748	18.236	18.1126	18.1785	17.9144	17.5609	17.9786	17.6979	17.749
937	117	Q9CQC7	Ndufb4	5	5	24.441	24.3501	0.00897959	1.065	1.065	KO_1Way up vs WT_12mo	1.02083	1.11109	0.0908542	Ndufb4	Ndufb4	NADH:ubiquinone oxidoreductase subunit B4	Ndufb4	68194	68194	16|16 B3	protein-coding	24.3956	24.3501	24.441	+0.5σ	24.2814	24.3484	24.3373	24.4151	24.3683	24.4818	24.4587	24.3906	24.4415	24.4322
1792	118	Q8R2Z5	Vwa1	5	5	17.6949	18.2069	0.00918065	0.701256	-1.42601	KO_1Way down vs WT_12mo	-1.8124	-1.122	-0.511988	Vwa1	Vwa1	von Willebrand factor A domain containing 1	Vwa1	246228	246228	4|4 E2	protein-coding	17.9509	17.6949	18.2069	-2σ	18.1087	18.3742	18.1024	18.2425	18.2064	18.179	17.5386	17.8477	17.4196	17.4893
624	119	P46935	Nedd4	5	5	20.5649	20.4036	0.00941397	1.11832	1.11832	KO_1Way up vs WT_12mo	1.03655	1.20654	0.161333	Nedd4	Nedd4	neural precursor cell expressed, developmentally down-regulated 4	Nedd4	17999	17999	9 D|9 40.08 cM	protein-coding	20.4842	20.4036	20.5649	+0.5σ	20.4626	20.3086	20.38	20.37	20.4967	20.493	20.6097	20.6506	20.4807	20.5907
15	120	P07724	Alb	5	5	31.3009	31.0198	0.00948467	1.21508	1.21508	KO_1Way up vs WT_12mo	1.06432	1.3872	0.281052	Alb	Alb	albumin	Alb	11657	11657	5 E1|5 44.7 cM	protein-coding	31.1604	31.0198	31.3009	+1σ	30.8517	30.8517	31.3016	31.047	31.047	31.3009	31.3009	31.3009	31.3009	31.3009
232	121	P49813	Tmod1	5	5	24.0488	23.9423	0.00963827	1.07661	1.07661	KO_1Way up vs WT_12mo	1.02373	1.13221	0.10649	Tmod1	Tmod1	tropomodulin 1	Tmod1	21916	21916	4 B1|4 24.49 cM	protein-coding	23.9956	23.9423	24.0488	+0.5σ	23.9906	23.9361	23.9611	23.9285	23.895	24.1237	24.0278	24.0899	23.9664	24.0359
366	122	P40936	Inmt	5	5	23.1966	22.7369	0.00966434	1.3752	1.3752	KO_1Way up vs WT_12mo	1.10642	1.70927	0.459644	Inmt	Inmt	indolethylamine N-methyltransferase	Inmt	21743	21743	6|6 B3	protein-coding	22.9668	22.7369	23.1966	+2σ	22.4359	22.645	22.7059	22.7579	23.1398	23.229	23.2358	23.3162	22.9109	23.291
208	123	E9PZD8	Cp	5	5	24.2636	24.0925	0.00982858	1.1259	1.1259	KO_1Way up vs WT_12mo	1.03808	1.22116	0.171083	Cp	Cp	ceruloplasmin	Cp	12870	12870	3|3 A2	protein-coding	24.178	24.0925	24.2636	+0.5σ	24.0915	24.0571	24.21	24.0822	24.0217	24.3669	24.2359	24.2007	24.1679	24.3465
1183	124	Q99KP6	Prpf19	5	5	18.4132	18.7542	0.0098613	0.789489	-1.26664	KO_1Way down vs WT_12mo	-1.48938	-1.07721	-0.341009	Prpf19	Prpf19	pre-mRNA processing factor 19	Prpf19	28000	28000	19 A|19 7.33 cM	protein-coding	18.5837	18.4132	18.7542	-1σ	18.8311	18.8078	18.9507	18.5835	18.598	18.3424	18.5813	18.2117	18.5776	18.3531
893	125	P14685	Psmd3	5	5	21.1444	21.0006	0.0100095	1.10482	1.10482	KO_1Way up vs WT_12mo	1.03165	1.18318	0.143811	Psmd3	Psmd3	proteasome (prosome, macropain) 26S subunit, non-ATPase, 3	Psmd3	22123	22123	11 D|11 62.39 cM	protein-coding	21.0725	21.0006	21.1444	+0.5σ	20.8612	21.0351	21.0686	21.0351	21.0027	21.1849	21.0584	21.1521	21.1476	21.179
40	126	P13541	Myh3	5	5	21.4976	21.7238	0.0101617	0.85489	-1.16974	KO_1Way down vs WT_12mo	-1.30327	-1.04989	-0.226189	Myh3	Myh3	myosin, heavy polypeptide 3, skeletal muscle, embryonic	Myh3	17883	17883	11 B3|11 40.59 cM	protein-coding	21.6107	21.4976	21.7238	-1σ	21.5725	21.837	21.7687	21.6687	21.7722	21.5514	21.3945	21.6313	21.3736	21.5374
1173	127	B1ARB3	Pecam1	5	5	19.928	19.4254	0.0102963	1.41681	1.41681	KO_1Way up vs WT_12mo	1.11355	1.80265	0.502643	Pecam1	Pecam1	platelet/endothelial cell adhesion molecule 1	Pecam1	18613	18613	11|11 E1	protein-coding	19.6767	19.4254	19.928	+2σ	19.4831	19.3586	19.4831	19.1923	19.6098	19.9988	20.1573	20.0471	19.4061	20.0307
869	128	Q9R1P1	Psmb3	5	5	18.9324	19.7864	0.0104663	0.553244	-1.80752	KO_1Way down vs WT_12mo	-2.72517	-1.19887	-0.854011	Psmb3	Psmb3	proteasome (prosome, macropain) subunit, beta type 3	Psmb3	26446	26446	11 D|11 61.07 cM	protein-coding	19.3594	18.9324	19.7864	-3σ	19.6992	19.6992	19.9679	19.762	19.8039	19.5959	19.2654	19.0649	18.5476	18.1882
1072	129	P01029	C4b	5	5	18.9971	19.8246	0.0104818	0.563518	-1.77457	KO_1Way down vs WT_12mo	-2.64188	-1.19199	-0.827467	C4b	C4b	complement component 4B (Chido blood group)	C4b	12268	12268	17 B1|17 18.29 cM	protein-coding	19.4108	18.9971	19.8246	-3σ	20.5721	19.3636	19.6203	19.8219	19.745	19.2952	18.4557	18.9737	19.0983	19.1626
84	130	P09411	Pgk1	5	5	27.4982	27.4009	0.0105789	1.06975	1.06975	KO_1Way up vs WT_12mo	1.02077	1.12108	0.0972708	Pgk1	Pgk1	phosphoglycerate kinase 1	Pgk1	18655	18655	X D|X 47.36 cM	protein-coding	27.4495	27.4009	27.4982	+0.5σ	27.3607	27.4228	27.3607	27.3607	27.4997	27.5201	27.4671	27.4846	27.4991	27.5201
1432	131	Q9QZD9	Eif3i	5	5	20.1998	19.7279	0.0106304	1.38696	1.38696	KO_1Way up vs WT_12mo	1.10463	1.74145	0.471928	Eif3i	Eif3i	eukaryotic translation initiation factor 3, subunit I	Eif3i	54709	54709	4 D2.2|4 63.26 cM	protein-coding	19.9639	19.7279	20.1998	+2σ	19.5467	19.447	20.0501	19.8637	19.7318	20.0183	20.5449	20.1466	20.217	20.0721
724	132	Q9WVQ5	Apip	5	5	21.44	21.1122	0.0107011	1.2551	1.2551	KO_1Way up vs WT_12mo	1.07134	1.47038	0.327806	Apip	Apip	APAF1 interacting protein	Apip	56369	56369	2|2 E2	protein-coding	21.2761	21.1122	21.44	+1σ	21.1888	21.2894	20.9377	21.2894	20.8556	21.5417	21.3147	21.4462	21.399	21.4985
484	133	O35295	Purb	5	5	20.8523	20.5307	0.0109099	1.24973	1.24973	KO_1Way up vs WT_12mo	1.06929	1.46061	0.321615	Purb	Purb	purine rich element binding protein B	Purb	19291	19291	11 A1|11 4.16 cM	protein-coding	20.6915	20.5307	20.8523	+1σ	20.3887	20.5575	20.4838	20.6254	20.5981	20.7331	20.8985	20.6899	21.1741	20.7659
309	134	Q9DCT8	Crip2	5	5	25.2323	25.0491	0.0110084	1.13542	1.13542	KO_1Way up vs WT_12mo	1.03874	1.24109	0.183223	Crip2	Crip2	cysteine rich protein 2	Crip2	68337	68337	12 F1|12 61.57 cM	protein-coding	25.1407	25.0491	25.2323	+0.5σ	25.0434	25.0534	25.0434	24.9995	25.1059	25.3649	25.3224	25.1676	25.2367	25.0701
1765	135	A0A0A6YW06	Enah	5	5	14.6615	14.0961	0.0112194	1.47976	1.47976	KO_1Way up vs WT_12mo	1.12323	1.94946	0.565365	Enah	Enah	ENAH actin regulator	Enah	13800	13800	1 H5|1 84.93 cM	protein-coding	14.3788	14.0961	14.6615	+2σ	14.019	13.6563	14.019	14.2941	14.4922	14.9019	14.7318	14.4925	14.8052	14.376
1371	136	Q925E7	Ppp2r2d	5	5	17.7762	17.6066	0.0117494	1.12479	1.12479	KO_1Way up vs WT_12mo	1.03467	1.22275	0.169654	Ppp2r2d	Ppp2r2d	protein phosphatase 2, regulatory subunit B, delta	Ppp2r2d	52432	52432	7 F4|7 82.95 cM	protein-coding	17.6914	17.6066	17.7762	+0.5σ	17.5997	17.5313	17.7094	17.4953	17.697	17.7339	17.8242	17.683	17.8439	17.7961
783	137	Q8R2U6	Nudt4	5	5	20.3324	19.9052	0.0119113	1.34454	1.34454	KO_1Way up vs WT_12mo	1.08896	1.66011	0.427114	Nudt4	Nudt4	nudix (nucleoside diphosphate linked moiety X)-type motif 4	Nudt4	71207	71207	10|10 C2	protein-coding	20.1188	19.9052	20.3324	+2σ	19.8868	19.7382	19.7318	20.0335	20.136	20.4693	19.9951	20.4093	20.2017	20.5863
817	138	Q9QYC0	Add1	5	5	21.0349	20.7137	0.0120465	1.24939	1.24939	KO_1Way up vs WT_12mo	1.0658	1.46461	0.321226	Add1	Add1	adducin 1 (alpha)	Add1	11518	11518	5 B2|5 17.9 cM	protein-coding	20.8743	20.7137	21.0349	+1σ	20.9646	20.5103	20.4899	20.7386	20.865	21.0891	21.1302	20.9795	20.9759	20.9998
791	139	O70251	Eef1b2	5	5	22.1211	21.9363	0.0120518	1.13669	1.13669	KO_1Way up vs WT_12mo	1.03734	1.24555	0.184836	Eef1b2	Eef1b2	eukaryotic translation elongation factor 1 beta 2	Eef1b2	55949	55949	1|1 C2	protein-coding	22.0287	21.9363	22.1211	+0.5σ	21.7792	21.9844	22.0587	21.9661	21.8931	22.0405	22.0862	22.2238	22.1622	22.093
1162	140	Q9D379	Ephx1	5	5	19.781	19.4701	0.0120859	1.24046	1.24046	KO_1Way up vs WT_12mo	1.0635	1.44686	0.310872	Ephx1	Ephx1	epoxide hydrolase 1, microsomal	Ephx1	13849	13849	1 H4|1 84.48 cM	protein-coding	19.6256	19.4701	19.781	+1σ	19.3692	19.6688	19.5668	19.1991	19.5467	19.8243	19.6604	19.6704	19.8546	19.8953
261	141	Q9WVK4	Ehd1	5	5	23.6184	23.4367	0.01217	1.13422	1.13422	KO_1Way up vs WT_12mo	1.0365	1.24114	0.181697	Ehd1	Ehd1	EH-domain containing 1	Ehd1	13660	13660	19 A|19 4.4 cM	protein-coding	23.5276	23.4367	23.6184	+0.5σ	23.3489	23.3529	23.4687	23.4095	23.6036	23.6386	23.6541	23.4961	23.6386	23.6646
205	142	Q04447	Ckb	5	5	23.5525	23.7993	0.0126582	0.842789	-1.18654	KO_1Way down vs WT_12mo	-1.3423	-1.04885	-0.246756	Ckb	Ckb	creatine kinase, brain	Ckb	12709	12709	12 F1|12 61.09 cM	protein-coding	23.6759	23.5525	23.7993	-1σ	23.9988	23.8557	23.6929	23.6036	23.8456	23.6121	23.5024	23.5272	23.4669	23.6541
1197	143	Q8K0D5	Gfm1	5	5	19.7799	19.3945	0.0126662	1.30628	1.30628	KO_1Way up vs WT_12mo	1.07732	1.5839	0.385461	Gfm1	Gfm1	G elongation factor, mitochondrial 1	Gfm1	28030	28030	3 E1|3 30.96 cM	protein-coding	19.5872	19.3945	19.7799	+2σ	19.2747	19.4382	19.6417	19.5541	19.0636	19.6918	19.7362	19.7695	20.022	19.6801
73	144	Q8BH59	Slc25a12	5	5	26.2447	26.3513	0.0127133	0.928748	-1.07672	KO_1Way down vs WT_12mo	-1.13573	-1.02078	-0.106641	Slc25a12	Slc25a12	solute carrier family 25 (mitochondrial carrier, Aralar), member 12	Slc25a12	78830	78830	2|2 C2	protein-coding	26.298	26.2447	26.3513	-0.5σ	26.3281	26.4009	26.4009	26.3134	26.3134	26.2787	26.2306	26.1553	26.2462	26.3126
1384	145	Q9EQI8	Mrpl46	5	5	16.6735	16.4039	0.0129579	1.20548	1.20548	KO_1Way up vs WT_12mo	1.05279	1.3803	0.269603	Mrpl46	Mrpl46	mitochondrial ribosomal protein L46	Mrpl46	67308	67308	7|7 D2	protein-coding	16.5387	16.4039	16.6735	+1σ	16.4809	16.318	16.4809	16.5362	16.2037	16.756	16.5728	16.4977	16.7664	16.7749
1182	146	P62849	Rps24	5	5	21.2852	21.1556	0.0130935	1.09396	1.09396	KO_1Way up vs WT_12mo	1.02489	1.16769	0.129557	Rps24	Rps24	ribosomal protein S24	Rps24	20088	20088	14|14 A3	protein-coding	21.2204	21.1556	21.2852	+0.5σ	21.2199	21.0733	21.1705	21.1815	21.1329	21.1964	21.2214	21.3463	21.3071	21.3546
13	147	Q62234	Myom1	5	5	27.5138	27.4329	0.0135131	1.0577	1.0577	KO_1Way up vs WT_12mo	1.0152	1.10198	0.0809333	Myom1	Myom1	myomesin 1	Myom1	17929	17929	17|17 E1.3	protein-coding	27.4733	27.4329	27.5138	+0.5σ	27.398	27.4852	27.398	27.398	27.4852	27.4991	27.4991	27.566	27.5201	27.4846
997	148	Q78PY7	Snd1	5	5	19.3689	18.3307	0.0137654	2.05366	2.05366	KO_1Way up vs WT_12mo	1.21101	3.48264	1.0382	Snd1	Snd1	staphylococcal nuclease and tudor domain containing 1	Snd1	56463	56463	6|6 A3.3	protein-coding	18.8498	18.3307	19.3689	+3σ	18.2654	18.197	18.654	18.3899	18.1474	19.611	19.3209	19.869	18.1651	19.8786
944	149	A0A2C9F2D2	Anxa7	5	5	19.9523	19.6596	0.0141527	1.22492	1.22492	KO_1Way up vs WT_12mo	1.05454	1.42284	0.29269	Anxa7	Anxa7	annexin A7	Anxa7	11750	11750	14 A3|14 11.53 cM	protein-coding	19.8059	19.6596	19.9523	+1σ	19.5794	19.6894	19.6042	19.6688	19.7563	19.7299	20.0534	20.0644	19.7526	20.1613
689	150	Q9CQF9	Pcyox1	5	5	20.6555	20.8996	0.0141853	0.844334	-1.18436	KO_1Way down vs WT_12mo	-1.34203	-1.04522	-0.244113	Pcyox1	Pcyox1	prenylcysteine oxidase 1	Pcyox1	66881	66881	6|6 D1	protein-coding	20.7776	20.6555	20.8996	-1σ	20.8759	20.9254	20.8612	20.932	20.9036	20.7443	20.8471	20.3904	20.606	20.6899
177	151	P52825	Cpt2	5	5	23.7851	23.9662	0.0142367	0.882069	-1.1337	KO_1Way down vs WT_12mo	-1.24389	-1.03327	-0.181037	Cpt2	Cpt2	carnitine palmitoyltransferase 2	Cpt2	12896	12896	4 C7|4 50.18 cM	protein-coding	23.8757	23.7851	23.9662	-1σ	24.0718	23.9459	23.8767	24.0217	23.9147	23.8937	23.8113	23.8354	23.7631	23.6221
1499	152	F8VQC1	Srp72	5	5	16.726	16.9649	0.0146812	0.847407	-1.18007	KO_1Way down vs WT_12mo	-1.33478	-1.04329	-0.238873	Srp72	Srp72	signal recognition particle 72	Srp72	66661	66661	5|5 C3.3	protein-coding	16.8454	16.726	16.9649	-1σ	16.8757	17.0431	16.9366	17.1203	16.8488	16.7749	16.5373	16.7965	16.8629	16.6585
1643	153	Q80Y14	Glrx5	5	5	18.347	17.3252	0.0150063	2.03044	2.03044	KO_1Way up vs WT_12mo	1.1958	3.44763	1.02179	Glrx5	Glrx5	glutaredoxin 5	Glrx5	73046	73046	12|12 E	protein-coding	17.8361	17.3252	18.347	+3σ	17.084	17.9776	16.4651	17.9905	17.1087	17.7784	18.5776	18.6693	18.3713	18.3383
1130	154	Q8VDK1	Nit1	5	5	17.8885	18.2529	0.0152019	0.776776	-1.28737	KO_1Way down vs WT_12mo	-1.55575	-1.06529	-0.36443	Nit1	Nit1	nitrilase 1	Nit1	27045	27045	1 H3|1 79.35 cM	protein-coding	18.0707	17.8885	18.2529	-2σ	18.1823	18.2313	18.4205	18.1823	18.2482	17.4821	17.8439	18.0563	18.0881	17.9722
419	155	P60843	Eif4a1	5	5	23.3067	23.1232	0.0156094	1.13569	1.13569	KO_1Way up vs WT_12mo	1.03181	1.25002	0.183564	Eif4a1	Eif4a1	eukaryotic translation initiation factor 4A1	Eif4a1	13681	13681	11 B3|11 42.86 cM	protein-coding	23.215	23.1232	23.3067	+0.5σ	23.1779	22.9595	23.2986	23.0764	23.1034	23.335	23.3518	23.3089	23.3089	23.229
1424	156	P61087	Ube2k	5	5	19.1525	18.8307	0.0157726	1.24995	1.24995	KO_1Way up vs WT_12mo	1.05605	1.47946	0.321875	Ube2k	Ube2k	ubiquitin-conjugating enzyme E2K	Ube2k	53323	53323	5 C3.1|5 33.72 cM	protein-coding	18.9916	18.8307	19.1525	+1σ	18.6249	18.7904	18.9767	18.8355	18.9257	19.3333	19.3413	19.0983	19.1115	18.8783
536	157	O88587	Comt	5	5	19.9189	20.2641	0.0164991	0.787168	-1.27038	KO_1Way down vs WT_12mo	-1.52486	-1.05836	-0.345257	Comt	Comt	catechol-O-methyltransferase	Comt	12846	12846	16 A3|16 11.4 cM	protein-coding	20.0915	19.9189	20.2641	-2σ	20.1414	20.299	20.3297	20.2248	20.3256	19.7583	20.1154	19.5959	20.1747	19.9499
251	158	Q9CQ62	Decr1	5	5	25.343	25.495	0.0168572	0.899997	-1.11111	KO_1Way down vs WT_12mo	-1.20458	-1.0249	-0.152008	Decr1	Decr1	2,4-dienoyl CoA reductase 1, mitochondrial	Decr1	67460	67460	4|4 A2	protein-coding	25.419	25.343	25.495	-0.5σ	25.5707	25.4769	25.3531	25.5372	25.5372	25.4486	25.2968	25.2968	25.3903	25.2826
1229	159	P63328	Ppp3ca	5	5	19.1923	18.8812	0.0170277	1.24065	1.24065	KO_1Way up vs WT_12mo	1.05125	1.46418	0.311095	Ppp3ca	Ppp3ca	protein phosphatase 3, catalytic subunit, alpha isoform	Ppp3ca	19055	19055	3|3 G3	protein-coding	19.0368	18.8812	19.1923	+1σ	18.8498	19.0834	19.0279	18.7442	18.7009	19.2864	19.3041	19.3308	19.0058	19.0346
1101	160	Q3UPH1	Prrc1	5	5	18.3415	18.8948	0.0179278	0.681471	-1.46741	KO_1Way down vs WT_12mo	-1.97679	-1.08929	-0.553277	Prrc1	Prrc1	proline-rich coiled-coil 1	Prrc1	73137	73137	18|18 D3	protein-coding	18.6181	18.3415	18.8948	-2σ	18.9337	18.7361	18.9337	19.0972	18.7731	18.3713	17.9786	18.0728	18.9779	18.3068
1466	161	O35566	Cd151	5	5	19.2595	20.0736	0.0185838	0.56874	-1.75827	KO_1Way down vs WT_12mo	-2.73548	-1.13016	-0.81416	Cd151	Cd151	CD151 antigen	Cd151	12476	12476	7 F5|7 86.82 cM	protein-coding	19.6666	19.2595	20.0736	-3σ	21.0122	19.848	20.0049	19.7824	19.7207	19.5754	19.3333	19.3333	18.7405	19.3149
1156	162	Q9DBG9	Tax1bp3	5	5	19.4899	18.6428	0.0187315	1.79889	1.79889	KO_1Way up vs WT_12mo	1.13485	2.85148	0.847106	Tax1bp3	Tax1bp3	Tax1 (human T cell leukemia virus type I) binding protein 3	Tax1bp3	76281	76281	11|11 B4	protein-coding	19.0663	18.6428	19.4899	+3σ	17.8278	18.6595	18.5522	18.7325	19.4419	19.5155	19.1813	19.9197	19.5754	19.2575
456	163	Q3TXS7	Psmd1	5	5	22.1293	21.9253	0.0188293	1.15193	1.15193	KO_1Way up vs WT_12mo	1.03081	1.28728	0.204048	Psmd1	Psmd1	proteasome (prosome, macropain) 26S subunit, non-ATPase, 1	Psmd1	70247	70247	1|1 C5	protein-coding	22.0273	21.9253	22.1293	+1σ	21.9707	22.0648	21.8931	21.7722	21.9255	22.192	22.0961	21.9522	22.244	22.1622
684	164	Q9CRB9	Chchd3	5	5	24.0568	24.2434	0.0195526	0.878653	-1.13811	KO_1Way down vs WT_12mo	-1.26091	-1.02726	-0.186634	Chchd3	Chchd3	coiled-coil-helix-coiled-coil-helix domain containing 3	Chchd3	66075	66075	6|6 A3.3	protein-coding	24.1501	24.0568	24.2434	-1σ	24.4151	24.2814	24.1621	24.1793	24.1793	23.9797	24.0698	24.1122	24.1778	23.9445
711	165	Q9R0P5	Dstn	5	5	23.3738	23.2366	0.0196124	1.09972	1.09972	KO_1Way up vs WT_12mo	1.0199	1.18578	0.137133	Dstn	Dstn	destrin	Dstn	56431	56431	2 G1|2 70.89 cM	protein-coding	23.3052	23.2366	23.3738	+0.5σ	23.2531	23.2465	23.2155	23.2018	23.2664	23.2446	23.4814	23.2973	23.3868	23.4588
368	166	Q78IK4	Apool	5	5	23.1331	23.2568	0.0196806	0.917819	-1.08954	KO_1Way down vs WT_12mo	-1.16624	-1.01789	-0.123718	Apool	Apool	apolipoprotein O-like	Apool	68117	68117	X|X E1	protein-coding	23.1949	23.1331	23.2568	-0.5σ	23.1861	23.2311	23.2868	23.3489	23.2311	23.0342	23.2067	23.1171	23.1997	23.1079
764	167	Q9CY58	Serbp1	5	5	20.0918	20.6427	0.0198356	0.682597	-1.46499	KO_1Way down vs WT_12mo	-1.98436	-1.08156	-0.550894	Serbp1	Serbp1	serpine1 mRNA binding protein 1	Serbp1	66870	66870	6|6 C1	protein-coding	20.3672	20.0918	20.6427	-2σ	20.4069	20.6878	20.865	20.5469	20.7068	20.6799	20.0353	19.7237	20.2364	19.7836
1728	168	P36552	Cpox	5	5	18.6188	19.0371	0.0200635	0.748297	-1.33637	KO_1Way down vs WT_12mo	-1.68365	-1.06072	-0.418316	Cpox	Cpox	coproporphyrinogen oxidase	Cpox	12892	12892	16|16 C1.2	protein-coding	18.828	18.6188	19.0371	-2σ	18.8582	19.4316	19.2058	18.9507	18.7394	18.6837	18.6977	18.7983	18.384	18.5304
854	169	P62814	Atp6v1b2	5	5	19.8644	20.1261	0.0201143	0.834113	-1.19888	KO_1Way down vs WT_12mo	-1.38539	-1.03748	-0.261684	Atp6v1b2	Atp6v1b2	ATPase, H+ transporting, lysosomal V1 subunit B2	Atp6v1b2	11966	11966	8|8 B3.3	protein-coding	19.9952	19.8644	20.1261	-1σ	19.9938	20.0521	20.2435	20.2574	20.0836	19.7526	19.837	20.1326	19.8846	19.7151
1773	170	A0A075B5R2	Ighv7-3	5	5	18.2201	17.3355	0.0202298	1.84628	1.84628	KO_1Way up vs WT_12mo	1.13172	3.01201	0.884623	Ighv7-3	Ighv7-3	immunoglobulin heavy variable 7-3	Ighv7-3	629822	629822	12|12 F1	pseudo	17.7778	17.3355	18.2201	+3σ	17.3111	17.2687	16.8621	17.8472	17.3885	18.2367	17.2617	18.4788	18.2769	18.8466
579	171	B2RPU8	Zbed5	5	5	21.7105	21.985	0.0203506	0.826692	-1.20964	KO_1Way down vs WT_12mo	-1.40838	-1.03894	-0.274579	Zbed5	Zbed5	zinc finger, BED type containing 5	Zbed5	71970	71970	5|5 G1.3	protein-coding	21.8478	21.7105	21.985	-1σ	22.0707	22.117	21.7919	22.1583	21.7872	21.7082	21.8403	21.7744	21.6876	21.5417
1038	172	V9GWW6	Mlip	5	5	19.4964	19.8711	0.0208493	0.771221	-1.29665	KO_1Way down vs WT_12mo	-1.59769	-1.05233	-0.374784	Mlip	Mlip	muscular LMNA-interacting protein	Mlip	69642	69642	9|9 D	protein-coding	19.6837	19.4964	19.8711	-2σ	20.0206	20.0562	19.9814	19.3928	19.9047	19.4487	19.5329	19.6531	19.4667	19.3805
96	173	P10493	Nid1	5	5	25.7366	25.5796	0.0209257	1.11503	1.11503	KO_1Way up vs WT_12mo	1.02153	1.21708	0.157081	Nid1	Nid1	nidogen 1	Nid1	18073	18073	13 A1|13 5.26 cM	protein-coding	25.6581	25.5796	25.7366	+0.5σ	25.5262	25.5504	25.7134	25.4925	25.6152	25.8689	25.7731	25.6515	25.6949	25.6949
461	174	Q9CPU4	Mgst3	5	5	24.9854	24.9094	0.0211794	1.05409	1.05409	KO_1Way up vs WT_12mo	1.01024	1.09983	0.0759936	Mgst3	Mgst3	microsomal glutathione S-transferase 3	Mgst3	66447	66447	1|1 H2.3	protein-coding	24.9474	24.9094	24.9854	+0.5σ	24.8677	24.9842	24.9261	24.8845	24.8845	24.9242	24.982	25.0116	24.9975	25.0116
651	175	P42932	Cct8	5	5	23.409	23.2703	0.0214115	1.10088	1.10088	KO_1Way up vs WT_12mo	1.01857	1.18985	0.138662	Cct8	Cct8	chaperonin containing Tcp1, subunit 8 (theta)	Cct8	12469	12469	16|16 C3.3	protein-coding	23.3396	23.2703	23.409	+0.5σ	23.1094	23.3489	23.3529	23.2597	23.2807	23.3782	23.4669	23.4325	23.4155	23.3518
1075	176	E9QK48	Eml2	5	5	20.4646	20.2735	0.021768	1.14163	1.14163	KO_1Way up vs WT_12mo	1.02527	1.27119	0.191093	Eml2	Eml2	echinoderm microtubule associated protein like 2	Eml2	72205	72205	7|7 A3	protein-coding	20.3691	20.2735	20.4646	+1σ	20.2143	20.2396	20.2396	20.3848	20.2893	20.5077	20.5154	20.5254	20.5485	20.2261
735	177	A0A087WR45	Prob1	5	5	20.492	20.6689	0.0220029	0.884557	-1.13051	KO_1Way down vs WT_12mo	-1.24916	-1.02313	-0.176972	Prob1	Prob1	proline rich basic protein 1	Prob1	381148	381148	18|18 B2	protein-coding	20.5804	20.492	20.6689	-1σ	20.7015	20.7862	20.6198	20.7535	20.4838	20.5154	20.5522	20.3724	20.4996	20.5203
1303	178	G3X928	Sec23ip	5	5	18.5784	18.1482	0.0220726	1.34745	1.34745	KO_1Way up vs WT_12mo	1.05698	1.71775	0.43023	Sec23ip	Sec23ip	Sec23 interacting protein	Sec23ip	207352	207352	7 F3|7 70.51 cM	protein-coding	18.3633	18.1482	18.5784	+2σ	18.1711	17.9405	18.211	18.4344	17.9838	18.1297	18.7496	18.8509	18.5841	18.5776
413	179	P82349	Sgcb	5	5	22.5323	22.7077	0.0221046	0.885553	-1.12924	KO_1Way down vs WT_12mo	-1.24674	-1.02281	-0.175349	Sgcb	Sgcb	sarcoglycan, beta (dystrophin-associated glycoprotein)	Sgcb	24051	24051	5|5 C3.3	protein-coding	22.62	22.5323	22.7077	-1σ	22.4893	22.7327	22.7737	22.8035	22.7393	22.4656	22.5477	22.5901	22.5831	22.4752
677	180	Q5EBP8	Hnrnpa1	5	5	22.8828	22.4544	0.0221277	1.34579	1.34579	KO_1Way up vs WT_12mo	1.05659	1.71415	0.428451	Hnrnpa1	Hnrnpa1	heterogeneous nuclear ribonucleoprotein A1	Hnrnpa1	15382	15382	15 F3|15 58.58 cM	protein-coding	22.6686	22.4544	22.8828	+2σ	22.3105	22.7906	22.3105	22.3677	22.4927	23.0226	22.8532	23.0683	22.4218	23.0483
448	181	Q8CGY6	Unc45b	5	5	22.7988	22.6385	0.0226046	1.11746	1.11746	KO_1Way up vs WT_12mo	1.02034	1.22383	0.160227	Unc45b	Unc45b	unc-45 myosin chaperone B	Unc45b	217012	217012	11|11 C	protein-coding	22.7187	22.6385	22.7988	+0.5σ	22.6296	22.5296	22.6004	22.7003	22.7327	22.9109	22.7306	22.7086	22.9	22.7437
1335	182	Q9CQI6	Cotl1	5	5	19.3857	19.0219	0.0230154	1.28688	1.28688	KO_1Way up vs WT_12mo	1.0459	1.58338	0.363878	Cotl1	Cotl1	coactosin-like 1 (Dictyostelium)	Cotl1	72042	72042	8|8 E1	protein-coding	19.2038	19.0219	19.3857	+2σ	19.1991	18.9063	18.9119	18.9157	19.1764	19.4288	19.7836	19.3097	19.281	19.1257
1461	183	Q8R2Y8	Ptrh2	5	5	17.0952	17.5002	0.0230173	0.755238	-1.32409	KO_1Way down vs WT_12mo	-1.66779	-1.05121	-0.404997	Ptrh2	Ptrh2	peptidyl-tRNA hydrolase 2	Ptrh2	217057	217057	11|11 C	protein-coding	17.2977	17.0952	17.5002	-2σ	17.2768	17.6564	17.4392	17.6159	17.5127	16.7664	17.0133	17.4893	16.9375	17.2693
1058	184	G3UXW9	Gps1	5	5	19.2345	18.8746	0.0235212	1.2834	1.2834	KO_1Way up vs WT_12mo	1.04431	1.57723	0.359972	Gps1	Gps1	G protein pathway suppressor 1	Gps1	209318	209318	11|11 E2	protein-coding	19.0545	18.8746	19.2345	+1σ	18.9399	18.6771	19.246	18.5463	18.9636	19.1626	19.2864	19.1115	19.3413	19.271
266	185	P21614	Gc	5	5	23.5222	23.305	0.02369	1.16248	1.16248	KO_1Way up vs WT_12mo	1.0263	1.31673	0.217205	Gc	Gc	vitamin D binding protein	Gc	14473	14473	5 E1|5 44.32 cM	protein-coding	23.4136	23.305	23.5222	+1σ	23.2727	23.0884	23.4524	23.3804	23.3312	23.5741	23.3782	23.6386	23.5741	23.4461
514	186	P17426	Ap2a1	5	5	19.3473	19.0468	0.023779	1.23155	1.23155	KO_1Way up vs WT_12mo	1.0364	1.46345	0.300479	Ap2a1	Ap2a1	adaptor-related protein complex 2, alpha 1 subunit	Ap2a1	11771	11771	7|7 B3	protein-coding	19.1971	19.0468	19.3473	+1σ	18.9921	19.2638	19.1408	19.0468	18.7904	19.3553	19.1671	19.6006	19.371	19.2423
417	187	P28653	Bgn	5	5	22.5878	22.039	0.023914	1.46286	1.46286	KO_1Way up vs WT_12mo	1.06704	2.0055	0.548789	Bgn	Bgn	biglycan	Bgn	12111	12111	X A7.3|X 37.33 cM	protein-coding	22.3134	22.039	22.5878	+2σ	22.3304	22.1793	22.4117	21.5818	21.6916	22.3177	22.7782	22.37	22.7873	22.6855
1226	188	P84091	Ap2m1	5	5	20.8446	20.5262	0.0243855	1.24699	1.24699	KO_1Way up vs WT_12mo	1.0375	1.49877	0.318449	Ap2m1	Ap2m1	adaptor-related protein complex 2, mu 1 subunit	Ap2m1	11773	11773	16|16 A3	protein-coding	20.6854	20.5262	20.8446	+1σ	20.3567	20.7535	20.1951	20.5721	20.7535	20.7766	20.7715	20.9235	20.8379	20.9137
737	189	O88531	Ppt1	5	5	21.6009	21.163	0.0248243	1.35465	1.35465	KO_1Way up vs WT_12mo	1.05082	1.74632	0.437917	Ppt1	Ppt1	palmitoyl-protein thioesterase 1	Ppt1	19063	19063	4 D2.2|4 57.27 cM	protein-coding	21.3819	21.163	21.6009	+2σ	20.6486	21.3049	21.0308	21.5199	21.3106	21.4662	21.6836	21.4985	21.7335	21.6227
2033	190	E9QL65	Cog3	5	5	16.7441	16.2564	0.0251708	1.4022	1.4022	KO_1Way up vs WT_12mo	1.05578	1.86228	0.48769	Cog3	Cog3	component of oligomeric golgi complex 3	Cog3	338337	338337	14|14 D3	protein-coding	16.5003	16.2564	16.7441	+2σ	16.5236	15.9389	16.2226	16.143	16.454	16.601	16.9237	17.097	16.2737	16.825
447	191	P80314	Cct2	5	5	21.5821	21.3449	0.0259722	1.17867	1.17867	KO_1Way up vs WT_12mo	1.02569	1.35445	0.237154	Cct2	Cct2	chaperonin containing Tcp1, subunit 2 (beta)	Cct2	12461	12461	10|10 D2	protein-coding	21.4635	21.3449	21.5821	+1σ	21.2823	21.3968	21.4405	21.0769	21.5282	21.6721	21.5029	21.5029	21.5564	21.676
425	192	D3Z2H9	Tpm3-rs7	5	5	18.2818	18.063	0.0266857	1.16377	1.16377	KO_1Way up vs WT_12mo	1.02283	1.32413	0.218806	Tpm3-rs7	Tpm3-rs7	tropomyosin 3, related sequence 7	Tpm3-rs7	621054	621054	14 E4|14 58.32 cM	pseudo	18.1724	18.063	18.2818	+1σ	18.0331	17.8144	18.2425	18.1288	18.0964	18.2209	18.2404	18.302	18.2209	18.4251
1068	193	P97855	G3bp1	5	5	19.6771	19.2951	0.0267432	1.30316	1.30316	KO_1Way up vs WT_12mo	1.04009	1.63277	0.382013	G3bp1	G3bp1	GTPase activating protein (SH3 domain) binding protein 1	G3bp1	27041	27041	11|11 B1.3	protein-coding	19.4861	19.2951	19.6771	+2σ	19.4149	19.435	18.863	19.4228	19.3399	19.8654	19.8057	19.3805	19.7641	19.5699
858	194	G3UVW1	Mpv17	5	5	19.0152	19.2508	0.0270587	0.849329	-1.1774	KO_1Way down vs WT_12mo	-1.3536	-1.02414	-0.235604	Mpv17	Mpv17	MpV17 mitochondrial inner membrane protein	Mpv17	17527	17527	5|5 B1	protein-coding	19.133	19.0152	19.2508	-1σ	19.3586	19.1657	19.3247	19.2058	19.1991	18.9515	18.9935	19.0302	19.2911	18.8094
598	195	Q91VM9	Ppa2	5	5	22.5176	22.6832	0.0270792	0.89152	-1.12168	KO_1Way down vs WT_12mo	-1.23726	-1.01689	-0.165661	Ppa2	Ppa2	pyrophosphatase (inorganic) 2	Ppa2	74776	74776	3|3 G3	protein-coding	22.6004	22.5176	22.6832	-0.5σ	22.7097	22.4893	22.6871	22.7393	22.7906	22.5687	22.5633	22.4882	22.5687	22.3988
648	196	E0CYV0	Pcmt1	5	5	22.4452	22.2017	0.0273205	1.18394	1.18394	KO_1Way up vs WT_12mo	1.02462	1.36802	0.243592	Pcmt1	Pcmt1	protein-L-isoaspartate (D-aspartate) O-methyltransferase 1	Pcmt1	18537	18537	10 A1|10 2.26 cM	protein-coding	22.3235	22.2017	22.4452	+1σ	21.8931	22.3262	22.1888	22.3	22.3	22.2916	22.5103	22.5177	22.4593	22.4472
1181	197	O88986	Gcat	5	5	19.1138	19.66	0.0273865	0.684851	-1.46017	KO_1Way down vs WT_12mo	-2.01931	-1.05585	-0.546137	Gcat	Gcat	glycine C-acetyltransferase (2-amino-3-ketobutyrate-coenzyme A ligase)	Gcat	26912	26912	15 E1|15 37.7 cM	protein-coding	19.3869	19.1138	19.66	-2σ	19.6949	19.7866	19.6351	19.745	19.4382	18.8939	18.5625	19.2993	19.7151	19.0983
178	198	Q99MN9	Pccb	5	5	24.2523	24.109	0.0276503	1.10443	1.10443	KO_1Way up vs WT_12mo	1.01416	1.20272	0.143298	Pccb	Pccb	propionyl Coenzyme A carboxylase, beta polypeptide	Pccb	66904	66904	9|9 E4	protein-coding	24.1806	24.109	24.2523	+0.5σ	23.9611	24.2282	24.0718	24.0915	24.1922	24.27	24.3044	24.2471	24.2793	24.1605
1209	199	P62315	Snrpd1	5	5	18.872	19.2912	0.027979	0.747817	-1.33723	KO_1Way down vs WT_12mo	-1.7173	-1.04127	-0.419243	Snrpd1	Snrpd1	small nuclear ribonucleoprotein D1	Snrpd1	20641	20641	18|18 A1	protein-coding	19.0816	18.872	19.2912	-2σ	19.7725	19.0468	19.2895	19.1013	19.246	18.7561	18.6164	19.085	18.8421	19.0602
847	200	Q9QXC1	Fetub	5	5	20.0445	19.7611	0.028159	1.21709	1.21709	KO_1Way up vs WT_12mo	1.02745	1.44173	0.283431	Fetub	Fetub	fetuin beta	Fetub	59083	59083	16 B1|16 13.76 cM	protein-coding	19.9028	19.7611	20.0445	+1σ	19.6504	19.778	19.7064	19.6833	19.9874	20.0406	19.8006	20.1704	19.9197	20.2912
927	201	Q8CG76	Akr7a5	5	5	21.4867	21.36	0.0282791	1.09179	1.09179	KO_1Way up vs WT_12mo	1.0121	1.17776	0.126699	Akr7a5	Akr7a5	aldo-keto reductase family 7, member A5 (aflatoxin aldehyde reductase)	Akr7a5	110198	110198	4 D3|4 70.64 cM	protein-coding	21.4233	21.36	21.4867	+0.5σ	21.3968	21.2823	21.3441	21.4066	21.3703	21.5911	21.4391	21.5314	21.5218	21.3501
698	202	P45591	Cfl2	5	5	22.4567	22.2748	0.0286851	1.13435	1.13435	KO_1Way up vs WT_12mo	1.01703	1.26521	0.18187	Cfl2	Cfl2	cofilin 2, muscle	Cfl2	12632	12632	12|12 C1	protein-coding	22.3657	22.2748	22.4567	+0.5σ	22.3785	22.0346	22.3357	22.3051	22.3202	22.4067	22.5687	22.4218	22.4706	22.4156
1375	203	Q5XJY5	Arcn1	5	5	19.8652	19.4806	0.0287922	1.30547	1.30547	KO_1Way up vs WT_12mo	1.03614	1.64482	0.384572	Arcn1	Arcn1	archain 1	Arcn1	213827	213827	9|9 A5.2	protein-coding	19.6729	19.4806	19.8652	+2σ	19.4935	19.0434	19.8163	19.5249	19.5249	19.837	20.0584	19.8006	19.6378	19.992
587	204	E9QLJ0	Cmya5	5	5	21.7727	21.8612	0.0291435	0.9405	-1.06326	KO_1Way down vs WT_12mo	-1.12151	-1.00805	-0.0884998	Cmya5	Cmya5	cardiomyopathy associated 5	Cmya5	76469	76469	13|13 C3	protein-coding	21.8169	21.7727	21.8612	-0.5σ	21.7831	21.7919	21.9184	21.8787	21.9339	21.8093	21.7853	21.7527	21.7673	21.7489
1323	205	O35841	Api5	5	5	16.3627	15.9737	0.0295246	1.30947	1.30947	KO_1Way up vs WT_12mo	1.03508	1.6566	0.388982	Api5	Api5	apoptosis inhibitor 5	Api5	11800	11800	2|2 E1	protein-coding	16.1682	15.9737	16.3627	+2σ	15.6836	16.2888	16.1302	15.827	15.9389	16.6585	16.3186	16.1307	16.1814	16.5241
421	206	P80316	Cct5	5	5	22.3717	22.2948	0.0301609	1.05474	1.05474	KO_1Way up vs WT_12mo	1.00659	1.10519	0.0768886	Cct5	Cct5	chaperonin containing Tcp1, subunit 5 (epsilon)	Cct5	12465	12465	15|15 B2	protein-coding	22.3332	22.2948	22.3717	+0.5σ	22.2772	22.2652	22.3262	22.3402	22.2652	22.3736	22.3248	22.39	22.4524	22.3177
885	207	P31428	Dpep1	5	5	20.544	20.113	0.0303025	1.34817	1.34817	KO_1Way up vs WT_12mo	1.03722	1.75234	0.431	Dpep1	Dpep1	dipeptidase 1	Dpep1	13479	13479	8 E1|8 72.08 cM	protein-coding	20.3285	20.113	20.544	+2σ	19.6273	20.0836	20.3368	20.3297	20.1875	20.28	20.4433	20.7603	20.4433	20.7932
1920	208	D3Z7P0	Babam2	5	5	17.3496	17.1069	0.0303124	1.18322	1.18322	KO_1Way up vs WT_12mo	1.02078	1.37151	0.242719	Babam2	Babam2	BRISC and BRCA1 A complex member 2	Babam2	107976	107976	5|5 B1	protein-coding	17.2282	17.1069	17.3496	+1σ	16.9021	17.1087	17.0645	17.2269	17.2324	17.3208	17.3753	17.1211	17.3753	17.5556
826	209	P62827	Ran	5	5	23.3895	23.309	0.0309881	1.05733	1.05733	KO_1Way up vs WT_12mo	1.00657	1.11064	0.0804212	Ran	Ran	RAN, member RAS oncogene family	Ran	19384	19384	5|5 G1.3	protein-coding	23.3493	23.309	23.3895	+0.5σ	23.3179	23.3735	23.341	23.2664	23.2465	23.4669	23.3723	23.3518	23.3782	23.3782
107	210	P47738	Aldh2	5	5	27.2481	27.1218	0.0311426	1.09152	1.09152	KO_1Way up vs WT_12mo	1.01024	1.17934	0.126339	Aldh2	Aldh2	aldehyde dehydrogenase 2, mitochondrial	Aldh2	11669	11669	5|5 F	protein-coding	27.185	27.1218	27.2481	+0.5σ	26.9918	27.1059	27.1358	27.1358	27.2395	27.2653	27.3043	27.1994	27.1674	27.3043
1195	211	P61089	Ube2n	5	5	21.9533	22.1307	0.0311616	0.884319	-1.13081	KO_1Way down vs WT_12mo	-1.26059	-1.01439	-0.177361	Ube2n	Ube2n	ubiquitin-conjugating enzyme E2N	Ube2n	93765	93765	10|10 C2	protein-coding	22.042	21.9533	22.1307	-1σ	22.2745	22.2457	21.9546	22.1735	22.0052	21.9978	21.9167	21.9457	21.8962	22.0104
1679	212	Q8R1X1	Acsl6	5	5	17.9127	18.3885	0.03122	0.719044	-1.39074	KO_1Way down vs WT_12mo	-1.86164	-1.03895	-0.475848	Acsl6	Acsl6	acyl-CoA synthetase long-chain family member 6	Acsl6	216739	216739	11 B1.3|11 32.13 cM	protein-coding	18.1506	17.9127	18.3885	-2σ	17.8195	18.621	18.2815	18.424	18.7967	17.6683	17.9481	17.9847	18.1097	17.8527
1149	213	Q9D7J9	Echdc3	5	5	22.343	22.1699	0.0313161	1.12742	1.12742	KO_1Way up vs WT_12mo	1.01391	1.25363	0.173021	Echdc3	Echdc3	enoyl Coenzyme A hydratase domain containing 3	Echdc3	67856	67856	2|2 A1	protein-coding	22.2565	22.1699	22.343	+0.5σ	22.0763	22.2207	22.1844	22.117	22.2512	22.2345	22.3291	22.5633	22.2632	22.3248
915	214	Q9JKR6	Hyou1	5	5	19.7106	19.261	0.031402	1.36567	1.36567	KO_1Way up vs WT_12mo	1.03635	1.79964	0.449612	Hyou1	Hyou1	hypoxia up-regulated 1	Hyou1	12282	12282	9|9 A5.2	protein-coding	19.4858	19.261	19.7106	+2σ	18.9063	19.375	19.5431	18.9973	19.4831	19.9605	19.7299	19.3457	19.929	19.5878
1227	215	D3YTQ3	Hnrnpdl	5	5	19.2524	19.0476	0.0315565	1.15256	1.15256	KO_1Way up vs WT_12mo	1.01625	1.30716	0.204846	Hnrnpdl	Hnrnpdl	heterogeneous nuclear ribonucleoprotein D-like	Hnrnpdl	50926	50926	5 E4|5 48.46 cM	protein-coding	19.15	19.0476	19.2524	+1σ	19.18	18.9728	19.1244	19.0636	18.8971	19.3941	19.3149	19.0346	19.2423	19.2763
1632	216	P41731	Cd63	5	5	18.4656	18.1288	0.0317174	1.26297	1.26297	KO_1Way up vs WT_12mo	1.02659	1.55379	0.336822	Cd63	Cd63	CD63 antigen	Cd63	12512	12512	10 D3|10 77.19 cM	protein-coding	18.2972	18.1288	18.4656	+1σ	17.8435	18.4344	18.1335	18.0787	18.1538	18.2268	18.4033	18.3577	18.6384	18.7018
1911	217	Q8BP07	Tmem220	5	5	17.2453	16.6457	0.0319469	1.51524	1.51524	KO_1Way up vs WT_12mo	1.04712	2.19264	0.599547	Tmem220	Tmem220	transmembrane protein 220	Tmem220	338369	338369	11|11 B3	protein-coding	16.9455	16.6457	17.2453	+2σ	16.4651	16.1671	17.1308	16.3695	17.0961	17.683	16.9797	17.1899	17.0848	17.2889
248	218	Q8CHT0	Aldh4a1	5	5	23.6682	23.4868	0.0320535	1.13393	1.13393	KO_1Way up vs WT_12mo	1.01393	1.26813	0.181333	Aldh4a1	Aldh4a1	aldehyde dehydrogenase 4 family, member A1	Aldh4a1	212647	212647	4 D3|4 70.79 cM	protein-coding	23.5775	23.4868	23.6682	+0.5σ	23.4893	23.5633	23.4893	23.4828	23.4095	23.6315	23.7187	23.7468	23.8113	23.4325
273	219	P58281	Opa1	5	5	23.4696	23.6882	0.0332256	0.859449	-1.16354	KO_1Way down vs WT_12mo	-1.33305	-1.01558	-0.218516	Opa1	Opa1	OPA1, mitochondrial dynamin like GTPase	Opa1	74143	74143	16 B2|16 20.65 cM	protein-coding	23.5789	23.4696	23.6882	-1σ	23.8265	23.8884	23.5513	23.5414	23.633	23.4871	23.5397	23.589	23.3398	23.3925
206	220	P19157	Gstp1	5	5	25.9127	25.7781	0.0341539	1.09778	1.09778	KO_1Way up vs WT_12mo	1.00898	1.19439	0.134583	Gstp1	Gstp1	glutathione S-transferase, pi 1	Gstp1	14870	14870	19 A|19 3.75 cM	protein-coding	25.8454	25.7781	25.9127	+0.5σ	25.6242	25.7935	25.8013	25.7573	25.9143	25.8293	25.8827	25.9423	25.9546	25.9546
743	221	E9QPD7	Pcx	5	5	20.5635	20.7258	0.034854	0.893624	-1.11904	KO_1Way down vs WT_12mo	-1.23947	-1.01031	-0.16226	Pcx	Pcx	pyruvate carboxylase	Pcx	18563	18563	19 A|19 4.07 cM	protein-coding	20.6446	20.5635	20.7258	-0.5σ	20.8221	20.7952	20.605	20.758	20.6486	20.4234	20.6181	20.7085	20.5154	20.5522
1395	222	P03953	Cfd	5	5	19.3611	18.7755	0.0348632	1.50063	1.50063	KO_1Way up vs WT_12mo	1.03768	2.17014	0.585572	Cfd	Cfd	complement factor D (adipsin)	Cfd	11537	11537	10 C1|10 39.72 cM	protein-coding	19.0683	18.7755	19.3611	+2σ	18.7841	18.9546	19.383	18.3213	18.4344	19.3366	19.5493	18.9072	19.3366	19.6756
280	223	P16332	Mmut	5	5	22.7784	22.8689	0.0352937	0.939141	-1.0648	KO_1Way down vs WT_12mo	-1.12754	-1.00556	-0.0905857	Mmut	Mmut	methylmalonyl-Coenzyme A mutase	Mmut	17850	17850	17 B2|17 19.55 cM	protein-coding	22.8237	22.7784	22.8689	-0.5σ	22.8301	22.8623	22.8335	22.9426	22.8761	22.822	22.6802	22.772	22.8532	22.7644
70	224	E9Q616	Ahnak	5	5	26.1284	26.0258	0.0353175	1.07369	1.07369	KO_1Way up vs WT_12mo	1.00629	1.14561	0.102581	Ahnak	Ahnak	AHNAK nucleoprotein (desmoyokin)	Ahnak	66395	66395	19|19 A	protein-coding	26.0771	26.0258	26.1284	+0.5σ	26.1434	26.0135	25.9794	25.9794	26.0135	26.1998	26.0716	26.1177	26.0716	26.1814
36	225	Q8BWT1	Acaa2	5	5	28.664	28.7986	0.0353582	0.910875	-1.09785	KO_1Way down vs WT_12mo	-1.19542	-1.00824	-0.134675	Acaa2	Acaa2	acetyl-Coenzyme A acyltransferase 2 (mitochondrial 3-oxoacyl-Coenzyme A thiolase)	Acaa2	52538	52538	18 E2|18 50.76 cM	protein-coding	28.7313	28.664	28.7986	-0.5σ	28.8829	28.7035	28.7371	28.9324	28.7371	28.6761	28.7364	28.6187	28.7032	28.5855
516	226	P03888	ND1	5	5	23.7889	23.6923	0.0359201	1.06925	1.06925	KO_1Way up vs WT_12mo	1.00565	1.13687	0.0965978	ND1	ND1	NADH dehydrogenase subunit 1	mt-Nd1	17716	17716	-	protein-coding	23.7406	23.6923	23.7889	+0.5σ	23.6146	23.7646	23.6146	23.711	23.7569	23.7551	23.8046	23.7631	23.8587	23.7631
123	227	D3Z041	Acsl1	5	5	26.5393	26.6949	0.0359477	0.897754	-1.11389	KO_1Way down vs WT_12mo	-1.22956	-1.0091	-0.155608	Acsl1	Acsl1	acyl-CoA synthetase long-chain family member 1	Acsl1	14081	14081	8|8 B1.1	protein-coding	26.6171	26.5393	26.6949	-0.5σ	26.7512	26.6929	26.6396	26.8188	26.572	26.619	26.4166	26.6383	26.5701	26.4524
1267	228	P62245	Rps15a	5	5	21.6429	21.7893	0.0362358	0.903457	-1.10686	KO_1Way down vs WT_12mo	-1.21496	-1.00837	-0.146472	Rps15a	Rps15a	ribosomal protein S15A	Rps15a	267019	267019	7|7 F1	protein-coding	21.7161	21.6429	21.7893	-0.5σ	21.8033	21.8841	21.7258	21.7543	21.7792	21.8285	21.5838	21.5804	21.5417	21.68
1155	229	E9Q2T3	Tnxb	5	5	20.2077	20.5031	0.0365816	0.814829	-1.22725	KO_1Way down vs WT_12mo	-1.4817	-1.0165	-0.295431	Tnxb	Tnxb	tenascin XB	Tnxb	81877	81877	17 B1|17 18.24 cM	protein-coding	20.3554	20.2077	20.5031	-1σ	20.5435	20.4672	20.4672	20.299	20.7386	19.8607	20.3231	20.2522	20.4093	20.193
293	230	P15116	Cdh2	5	5	22.2254	21.9367	0.036711	1.22158	1.22158	KO_1Way up vs WT_12mo	1.01595	1.46882	0.288748	Cdh2	Cdh2	cadherin 2	Cdh2	12558	12558	18 A1|18 10.1 cM	protein-coding	22.0811	21.9367	22.2254	+1σ	21.6813	21.8528	22.194	21.7612	22.194	22.1666	22.1344	22.2632	22.2072	22.3557
478	231	O08528	Hk2	5	5	22.177	22.4629	0.0370257	0.820261	-1.21912	KO_1Way down vs WT_12mo	-1.46374	-1.01539	-0.285844	Hk2	Hk2	hexokinase 2	Hk2	15277	15277	6 C3|6 35.94 cM	protein-coding	22.3199	22.177	22.4629	-1σ	22.2365	22.5849	22.4543	22.6817	22.3569	22.4348	22.2238	22.1872	22.1149	21.9243
1744	232	Q91VU6	Dcaf11	5	5	19.0852	18.6597	0.037235	1.34307	1.34307	KO_1Way up vs WT_12mo	1.02259	1.764	0.425538	Dcaf11	Dcaf11	DDB1 and CUL4 associated factor 11	Dcaf11	28199	28199	14 C3|14 28.19 cM	protein-coding	18.8725	18.6597	19.0852	+2σ	18.5264	19.0148	18.3111	18.615	18.8311	19.4763	18.8548	18.816	19.1579	19.1211
1123	233	Q9DBC7	Prkar1a	5	5	21.8721	22.0511	0.0373614	0.883303	-1.13211	KO_1Way down vs WT_12mo	-1.26982	-1.00934	-0.17902	Prkar1a	Prkar1a	protein kinase, cAMP dependent regulatory, type I, alpha	Prkar1a	19084	19084	11 E1|11 72.33 cM	protein-coding	21.9616	21.8721	22.0511	-1σ	21.9255	22.0911	22.1364	22.0763	22.0262	21.9457	21.6384	21.9877	21.8566	21.9319
1745	234	Q922S8	Kif2c	5	5	18.5269	18.923	0.0375579	0.759889	-1.31598	KO_1Way down vs WT_12mo	-1.69713	-1.02043	-0.396139	Kif2c	Kif2c	kinesin family member 2C	Kif2c	73804	73804	4 D1|4 53.42 cM	protein-coding	18.7249	18.5269	18.923	-2σ	18.8144	18.8971	19.0468	18.9546	18.9022	18.3319	18.6693	19.0692	18.2322	18.3319
1629	235	Q8R104	Sirt3	5	5	17.1481	17.6361	0.0377184	0.713019	-1.40249	KO_1Way down vs WT_12mo	-1.91922	-1.02488	-0.487987	Sirt3	Sirt3	sirtuin 3	Sirt3	64384	64384	7|7 F4- F5	protein-coding	17.3921	17.1481	17.6361	-2σ	18.0552	17.3646	17.5759	17.6242	17.5604	17.097	17.6068	17.1415	16.6175	17.2775
1526	236	Q3U0S6	Rasip1	5	5	16.7631	16.3066	0.0377444	1.37226	1.37226	KO_1Way up vs WT_12mo	1.0232	1.84038	0.45655	Rasip1	Rasip1	Ras interacting protein 1	Rasip1	69903	69903	7|7 B3	protein-coding	16.5348	16.3066	16.7631	+2σ	16.3948	16.6435	16.5104	16.1147	15.8695	16.3372	16.7386	17.0441	16.7835	16.9124
31	237	E9Q035	Gm20425	5	5	28.4103	28.2471	0.037996	1.11977	1.11977	KO_1Way up vs WT_12mo	1.00805	1.24388	0.163207	---	Gm20425	---	---	---	---	---	---	28.3287	28.2471	28.4103	+0.5σ	28.3775	28.0257	28.2768	28.3064	28.249	28.5222	28.3767	28.3767	28.3767	28.3992
148	238	D3YU08	Synpo2l	5	5	29.0692	28.9307	0.0382117	1.10071	1.10071	KO_1Way up vs WT_12mo	1.00669	1.20352	0.13844	Synpo2l	Synpo2l	synaptopodin 2-like	Synpo2l	68760	68760	14|14 A3	protein-coding	28.9999	28.9307	29.0692	+0.5σ	28.8364	28.9324	29.0872	28.796	29.0017	29.0862	29.001	29.0862	29.0862	29.0862
59	239	Q8VDD5	Myh9	5	5	24.9582	24.7903	0.038403	1.12341	1.12341	KO_1Way up vs WT_12mo	1.00798	1.25205	0.167882	Myh9	Myh9	myosin, heavy polypeptide 9, non-muscle	Myh9	17886	17886	15 E1|15 36.81 cM	protein-coding	24.8742	24.7903	24.9582	+0.5σ	24.9133	24.6309	24.7882	24.822	24.7973	24.8659	25.0814	24.982	24.8198	25.0418
34	240	F8VQJ3	Lamc1	5	5	25.8216	25.9409	0.0386976	0.920635	-1.08621	KO_1Way down vs WT_12mo	-1.17338	-1.00551	-0.119298	Lamc1	Lamc1	laminin, gamma 1	Lamc1	226519	226519	1 G3|1 65.3 cM	protein-coding	25.8813	25.8216	25.9409	-0.5σ	25.9557	25.9794	25.8113	25.9306	26.0278	25.729	25.8103	25.8293	25.8103	25.9293
905	241	Q9D892	Itpa	5	5	20.9387	20.737	0.0387047	1.15	1.15	KO_1Way up vs WT_12mo	1.00933	1.31028	0.201633	Itpa	Itpa	inosine triphosphatase (nucleoside triphosphate pyrophosphatase)	Itpa	16434	16434	2 F1|2 63.24 cM	protein-coding	20.8378	20.737	20.9387	+1σ	20.5764	20.7425	20.6643	20.7743	20.9278	21.0664	20.8585	20.7766	21.0622	20.9295
1124	242	Q01730	Rsu1	5	5	21.0432	20.7695	0.0387117	1.20892	1.20892	KO_1Way up vs WT_12mo	1.01268	1.44319	0.273716	Rsu1	Rsu1	Ras suppressor protein 1	Rsu1	20163	20163	2|2 A1	protein-coding	20.9063	20.7695	21.0432	+1σ	20.9582	20.4305	20.758	20.6924	21.0081	21.0711	21.0058	20.9185	21.0584	21.1621
836	243	Q9QZE5	Copg1	5	5	19.2809	19.1266	0.0388928	1.11292	1.11292	KO_1Way up vs WT_12mo	1.00701	1.22998	0.154356	Copg1	Copg1	coatomer protein complex, subunit gamma 1	Copg1	54161	54161	6 D1|6 39.13 cM	protein-coding	19.2037	19.1266	19.2809	+0.5σ	19.1349	19.0551	19.2851	19.1657	18.9921	19.2505	19.2119	19.2075	19.3333	19.4015
198	244	Q924X2	Cpt1b	5	5	26.1253	26.2597	0.038982	0.911067	-1.09761	KO_1Way down vs WT_12mo	-1.19752	-1.00604	-0.134371	Cpt1b	Cpt1b	carnitine palmitoyltransferase 1b, muscle	Cpt1b	12895	12895	15 E3|15 44.89 cM	protein-coding	26.1925	26.1253	26.2597	-0.5σ	26.3567	26.2941	26.2009	26.3281	26.1188	26.2306	26.0855	26.1314	26.1424	26.0368
233	245	D9J302	Pdlim5	5	5	25.3596	25.1816	0.0390528	1.13138	1.13138	KO_1Way up vs WT_12mo	1.00796	1.2699	0.178079	Pdlim5	Pdlim5	PDZ and LIM domain 5	Pdlim5	56376	56376	3|3 H1	protein-coding	25.2706	25.1816	25.3596	+0.5σ	25.2381	25.3531	25.2726	25.0302	25.0137	25.3096	25.3307	25.3785	25.3307	25.4486
1120	246	A0A087WQS2	Bzw1	5	5	17.1084	17.5076	0.0396522	0.758237	-1.31885	KO_1Way down vs WT_12mo	-1.71047	-1.01689	-0.399279	Bzw1	Bzw1	basic leucine zipper and W2 domains 1	Bzw1	66882	66882	1|1 C1.3	protein-coding	17.308	17.1084	17.5076	-2σ	17.7716	17.4524	16.9659	17.5997	17.7485	16.9237	17.2329	17.0133	17.0724	17.2995
194	247	P09671	Sod2	5	5	25.9287	25.7503	0.0408905	1.1316	1.1316	KO_1Way up vs WT_12mo	1.00656	1.27216	0.178361	Sod2	Sod2	superoxide dismutase 2, mitochondrial	Sod2	20656	20656	17 A1|17 8.75 cM	protein-coding	25.8395	25.7503	25.9287	+0.5σ	25.6527	25.7844	25.641	25.8304	25.8431	26.1424	25.8418	25.9293	25.9293	25.8005
573	248	P27659	Rpl3	5	5	23.3428	23.5239	0.0418303	0.882023	-1.13376	KO_1Way down vs WT_12mo	-1.27781	-1.00595	-0.181112	Rpl3	Rpl3	ribosomal protein L3	Rpl3	27367	27367	15|15 E1	protein-coding	23.4334	23.3428	23.5239	-1σ	23.7018	23.6241	23.3361	23.5347	23.4228	23.4325	23.2648	23.4155	23.33	23.2712
934	249	P32921	Wars	5	5	18.6108	18.3598	0.0418856	1.19001	1.19001	KO_1Way up vs WT_12mo	1.00819	1.40462	0.250975	Wars	Wars	tryptophanyl-tRNA synthetase	Wars	22375	22375	12|12 F1	protein-coding	18.4853	18.3598	18.6108	+1σ	18.4679	18.2198	18.3899	18.3314	18.3899	18.9559	18.523	18.4938	18.4162	18.6651
327	250	H3BKH6	Esd	5	5	22.981	22.8297	0.0419716	1.11051	1.11051	KO_1Way up vs WT_12mo	1.00487	1.22725	0.151221	Esd	Esd	esterase D/formylglutathione hydrolase	Esd	13885	13885	14 D3|14 39.38 cM	protein-coding	22.9053	22.8297	22.981	+0.5σ	22.8687	22.8556	22.7666	22.9125	22.7453	22.8013	23.1134	23.0483	22.9289	23.013
996	251	P61027	Rab10	5	5	20.8177	20.6853	0.0420323	1.09606	1.09606	KO_1Way up vs WT_12mo	1.00423	1.19628	0.132324	Rab10	Rab10	RAB10, member RAS oncogene family	Rab10	19325	19325	12 A1.1|12 1.71 cM	protein-coding	20.7515	20.6853	20.8177	+0.5σ	20.7862	20.7632	20.6371	20.6721	20.5681	20.9185	20.8735	20.8085	20.7838	20.7039
535	252	Q99LX0	Park7	5	5	24.1199	23.9814	0.0421309	1.10071	1.10071	KO_1Way up vs WT_12mo	1.00437	1.2063	0.138435	Park7	Park7	Parkinson disease (autosomal recessive, early onset) 7	Park7	57320	57320	4|4 E2	protein-coding	24.0507	23.9814	24.1199	+0.5σ	23.9459	23.9147	23.9906	23.9147	24.1411	23.989	24.2089	24.1605	24.1605	24.0804
914	253	Q5F285	Tmem256	5	5	20.7678	20.3124	0.0431365	1.37112	1.37112	KO_1Way up vs WT_12mo	1.01251	1.85673	0.455352	Tmem256	Tmem256	transmembrane protein 256	Tmem256	69186	69186	11|11 B3	protein-coding	20.5401	20.3124	20.7678	+2σ	20.4027	20.6643	19.6641	20.3209	20.5103	20.8324	20.7973	20.7331	20.9831	20.493
493	254	Q61234	Snta1	5	5	21.48	21.7871	0.0432543	0.808254	-1.23723	KO_1Way down vs WT_12mo	-1.51819	-1.00827	-0.307119	Snta1	Snta1	syntrophin, acidic 1	Snta1	20648	20648	2 H1|2 76.52 cM	protein-coding	21.6335	21.48	21.7871	-1σ	21.6287	21.8245	21.837	21.9255	21.72	21.2453	21.882	21.49	21.5374	21.2453
474	255	Q9QUI0	Rhoa	5	5	22.6201	22.7575	0.043471	0.909173	-1.0999	KO_1Way down vs WT_12mo	-1.20548	-1.00357	-0.137373	Rhoa	Rhoa	ras homolog family member A	Rhoa	11848	11848	9|9 F2	protein-coding	22.6888	22.6201	22.7575	-0.5σ	22.8623	22.7453	22.6926	22.811	22.6763	22.5403	22.6746	22.7376	22.4917	22.6566
892	256	Q9D7A8	Armc1	5	5	19.3878	19.0926	0.0437716	1.2271	1.2271	KO_1Way up vs WT_12mo	1.00732	1.49482	0.295247	Armc1	Armc1	armadillo repeat containing 1	Armc1	74252	74252	3|3 A2	protein-coding	19.2402	19.0926	19.3878	+1σ	19.2404	19.4228	18.8741	18.8538	19.0719	19.3097	19.4288	19.5611	19.4243	19.2154
525	257	P62908	Rps3	5	5	23.9656	24.0572	0.0439222	0.938486	-1.06555	KO_1Way down vs WT_12mo	-1.13289	-1.00221	-0.0915936	Rps3	Rps3	ribosomal protein S3	Rps3	27050	27050	7 E1|7 54.07 cM	protein-coding	24.0114	23.9656	24.0572	-0.5σ	24.1411	24.1144	24.0138	24.0491	23.9675	24.0468	23.9596	23.9596	23.9342	23.9277
506	258	Q9Z2U0	Psma7	5	5	22.3644	22.4908	0.0440265	0.916163	-1.09151	KO_1Way down vs WT_12mo	-1.18784	-1.00299	-0.126324	Psma7	Psma7	proteasome subunit alpha 7	Psma7	26444	26444	2|2 H4	protein-coding	22.4276	22.3644	22.4908	-0.5σ	22.4178	22.5114	22.5296	22.4359	22.5592	22.1975	22.4031	22.3846	22.3664	22.4706
1610	259	A0A140T8M2	Igkv12-44	5	5	20.3814	20.9398	0.044128	0.679066	-1.47261	KO_1Way down vs WT_12mo	-2.14061	-1.01307	-0.558377	Igkv12-44	Igkv12-44	immunoglobulin kappa variable 12-44	Igkv12-44	545851	545851	6|6 C1	other	20.6606	20.3814	20.9398	-2σ	21.4039	20.7816	20.9493	21.4004	20.1636	20.4996	20.3665	20.4646	20.2591	20.3171
1455	260	P55302	Lrpap1	5	5	17.9563	17.4195	0.0442297	1.45081	1.45081	KO_1Way up vs WT_12mo	1.01233	2.0792	0.536858	Lrpap1	Lrpap1	low density lipoprotein receptor-related protein associated protein 1	Lrpap1	16976	16976	5 B2|5 18.01 cM	protein-coding	17.6879	17.4195	17.9563	+2σ	17.0645	17.7778	17.6392	17.5604	17.0554	18.5776	17.8527	17.7431	17.9914	17.6168
94	261	E9PYJ9	Ldb3	5	5	17.8212	18.2129	0.0451254	0.762191	-1.31201	KO_1Way down vs WT_12mo	-1.70846	-1.00755	-0.391775	Ldb3	Ldb3	LIM domain binding 3	Ldb3	24131	24131	14|14 B	protein-coding	18.0171	17.8212	18.2129	-2σ	18.2398	17.9714	18.3524	18.5298	17.9714	17.6448	18.1651	17.5831	18.0799	17.6329
236	262	P08113	Hsp90b1	5	5	25.1432	25.006	0.0452449	1.09981	1.09981	KO_1Way up vs WT_12mo	1.00257	1.20648	0.137254	Hsp90b1	Hsp90b1	heat shock protein 90, beta (Grp94), member 1	Hsp90b1	22027	22027	10 C1|10 43.05 cM	protein-coding	25.0746	25.006	25.1432	+0.5σ	25.1059	24.8544	25.0715	25.0137	24.9842	25.2113	25.1775	25.1042	25.0116	25.2113
626	263	Q6ZWQ9	Myl12a	5	5	18.9347	18.5429	0.0453471	1.31206	1.31206	KO_1Way up vs WT_12mo	1.0072	1.7092	0.391835	Myl12a	Myl12a	myosin, light chain 12A, regulatory, non-sarcomeric	Myl12a	67268	67268	17|17 E1.3	protein-coding	18.7388	18.5429	18.9347	+2σ	18.5835	18.7731	18.5338	18.1335	18.6905	18.6318	18.8887	19.0515	18.7603	19.3413
156	264	Q61598	Gdi2	5	5	24.3218	24.4564	0.0453882	0.910916	-1.0978	KO_1Way down vs WT_12mo	-1.20222	-1.00245	-0.13461	Gdi2	Gdi2	guanosine diphosphate (GDP) dissociation inhibitor 2	Gdi2	14569	14569	13|13 A1	protein-coding	24.3891	24.3218	24.4564	-0.5σ	24.5333	24.5425	24.4061	24.4841	24.3159	24.1911	24.4043	24.3465	24.3752	24.2916
1725	265	A0A1W2P7Q9	Myl6	5	5	17.8153	17.4143	0.04607	1.32042	1.32042	KO_1Way up vs WT_12mo	1.0062	1.73277	0.400997	Myl6	Myl6	myosin, light polypeptide 6, alkali, smooth muscle and non-muscle	Myl6	17904	17904	10|10 D3	protein-coding	17.6148	17.4143	17.8153	+2σ	16.9366	17.6613	17.4192	17.2768	17.7778	17.6168	17.8038	17.6619	17.9308	18.0633
597	266	Q9D819	Ppa1	5	5	21.9717	21.8641	0.0461452	1.07738	1.07738	KO_1Way up vs WT_12mo	1.00163	1.15885	0.107521	Ppa1	Ppa1	pyrophosphatase (inorganic) 1	Ppa1	67895	67895	10 B4|10 32.25 cM	protein-coding	21.9179	21.8641	21.9717	+0.5σ	21.7722	21.8416	21.8193	21.9076	21.98	21.9167	22.0687	21.9211	21.9877	21.9641
20	267	E9QQ96	Obscn	5	5	25.9419	26.019	0.046805	0.947925	-1.05494	KO_1Way down vs WT_12mo	-1.11182	-1.00096	-0.0771553	Obscn	Obscn	obscurin, cytoskeletal calmodulin and titin-interacting RhoGEF	Obscn	380698	380698	11|11 B1.3	protein-coding	25.9805	25.9419	26.019	-0.5σ	26.0552	26.0376	25.9952	26.0278	25.9794	25.9423	25.962	26.0368	25.8556	25.9127
1770	268	Q9CXY6	Ilf2	5	5	18.1891	17.7715	0.0474527	1.33567	1.33567	KO_1Way up vs WT_12mo	1.00415	1.77664	0.417567	Ilf2	Ilf2	interleukin enhancer binding factor 2	Ilf2	67781	67781	3|3 F1	protein-coding	17.9803	17.7715	18.1891	+2σ	17.555	18.0168	17.7824	17.3746	18.1288	18.4828	17.9104	18.4162	18.0633	18.0728
1832	269	Q9WVC3	Cav2	5	5	18.0603	18.5971	0.0478176	0.689327	-1.45069	KO_1Way down vs WT_12mo	-2.09494	-1.00457	-0.53674	Cav2	Cav2	caveolin 2	Cav2	12390	12390	6|6 A2	protein-coding	18.3287	18.0603	18.5971	-2σ	18.4469	18.8826	18.4098	18.4205	18.8257	17.9308	18.2727	18.3175	18.4599	17.3208
672	270	E9PVP0	Stard10	5	5	21.6793	22.7286	0.0483438	0.483214	-2.06948	KO_1Way down vs WT_12mo	-4.25396	-1.00677	-1.04927	Stard10	Stard10	START domain containing 10	Stard10	56018	56018	7|7 E2	protein-coding	22.2039	21.6793	22.7286	-3σ	22.9784	22.4851	22.7327	22.6296	22.8173	20.6698	21.85	22.6855	22.5576	20.6338
1695	271	Q402B2	Wdr93	5	5	22.6994	22.5052	0.0484263	1.14407	1.14407	KO_1Way up vs WT_12mo	1.00119	1.30735	0.194176	Wdr93	Wdr93	WD repeat domain 93	Wdr93	626359	626359	7 D2|7	protein-coding	22.6023	22.5052	22.6994	+1σ	22.3529	22.3141	22.5428	22.6157	22.7003	22.6282	22.6439	22.8371	22.6746	22.7131
1054	272	P68181	Prkacb	5	5	18.8177	18.5692	0.048613	1.18802	1.18802	KO_1Way up vs WT_12mo	1.00134	1.4095	0.248555	Prkacb	Prkacb	protein kinase, cAMP dependent, catalytic, beta	Prkacb	18749	18749	3|3 H2	protein-coding	18.6934	18.5692	18.8177	+1σ	18.5615	18.2717	18.6829	18.522	18.8078	18.8218	19.0158	18.6554	18.7688	18.827
582	273	P62082	Rps7	5	5	22.652	22.535	0.0488713	1.0845	1.0845	KO_1Way up vs WT_12mo	1.00051	1.17553	0.117025	Rps7	Rps7	ribosomal protein S7	Rps7	20115	20115	12|12 A2	protein-coding	22.5935	22.535	22.652	+0.5σ	22.5084	22.3915	22.6408	22.5494	22.5849	22.6394	22.6662	22.5576	22.6662	22.7306
833	274	Q8BTS0	Ddx5	5	5	20.5218	20.6638	0.0490175	0.906258	-1.10344	KO_1Way down vs WT_12mo	-1.21692	-1.00054	-0.142007	Ddx5	Ddx5	DEAD box helicase 5	Ddx5	13207	13207	11 E1|11 70.01 cM	protein-coding	20.5928	20.5218	20.6638	-0.5σ	20.8295	20.6527	20.6682	20.5435	20.6254	20.5661	20.5308	20.5796	20.3665	20.5661
1502	275	P60670	Nploc4	5	5	17.8348	18.0289	0.049394	0.874066	-1.14408	KO_1Way down vs WT_12mo	-1.30832	-1.00045	-0.194186	Nploc4	Nploc4	NPL4 homolog, ubiquitin recognition factor	Nploc4	217365	217365	11|11 E2	protein-coding	17.9319	17.8348	18.0289	-1σ	18.0168	17.8195	18.0331	18.2717	18.0036	17.7178	17.897	17.8901	17.7431	17.9257
458	276	Q9D1G3	Hhatl	5	5	23.1644	23.3113	0.0499853	0.903209	-1.10716	KO_1Way down vs WT_12mo	-1.2258	-1.00001	-0.146869	Hhatl	Hhatl	hedgehog acyltransferase-like	Hhatl	74770	74770	9|9 F4	protein-coding	23.2379	23.1644	23.3113	-0.5σ	23.4168	23.1933	23.3179	23.3106	23.3179	23.2856	22.9828	23.2516	23.1645	23.1376
829	277	P23492	Pnp	5	5	22.0662	21.8811	0.0501894	1.13691	1.13691	KO_1Way up vs WT_12mo	-1.00013	1.29274	0.185118	Pnp	Pnp	purine-nucleoside phosphorylase	Pnp	18950	18950	14 C1|14 26.31 cM	protein-coding	21.9736	21.8811	22.0662	+0.5σ	21.868	21.8931	21.9339	21.7258	21.9844	22.3035	22.093	21.8962	22.0405	21.9978
646	278	Q9JMC3	Dnaja4	5	5	22.089	21.817	0.0502128	1.20743	1.20743	KO_1Way up vs WT_12mo	-1.00022	1.45822	0.271943	Dnaja4	Dnaja4	DnaJ heat shock protein family (Hsp40) member A4	Dnaja4	58233	58233	9|9 A5.3	protein-coding	21.953	21.817	22.089	+1σ	22.1583	21.8193	21.7368	21.7148	21.656	22.0998	22.3601	21.882	22.0625	22.0405
682	279	Q921H8	Acaa1a	5	5	21.2423	21.4423	0.0506785	0.870555	-1.14869	KO_1Way down vs WT_12mo	-1.32018	1.00052	-0.199992	Acaa1a	Acaa1a	acetyl-Coenzyme A acyltransferase 1A	Acaa1a	113868	113868	9 F3|9 71.33 cM	protein-coding	21.3423	21.2423	21.4423	-1σ	21.2682	21.4553	21.4512	21.5585	21.4782	21.2569	21.038	21.1395	21.3147	21.4624
938	280	Q8BHN3	Ganab	5	5	20.6655	20.5188	0.0511303	1.107	1.107	KO_1Way up vs WT_12mo	-1.00064	1.22623	0.14666	Ganab	Ganab	alpha glucosidase 2 alpha neutral subunit	Ganab	14376	14376	19|19 A	protein-coding	20.5922	20.5188	20.6655	+0.5σ	20.5839	20.4027	20.5014	20.5341	20.5721	20.5742	20.5485	20.7404	20.622	20.8424
163	281	P45952	Acadm	5	5	26.5649	26.7137	0.0519382	0.902017	-1.10863	KO_1Way down vs WT_12mo	-1.23041	1.0011	-0.148774	Acadm	Acadm	acyl-Coenzyme A dehydrogenase, medium chain	Acadm	11364	11364	3 H3|3 78.77 cM	protein-coding	26.6393	26.5649	26.7137	-0.5σ	26.9127	26.6656	26.5995	26.7512	26.6396	26.598	26.5117	26.5548	26.6767	26.4834
1067	282	Q8VEH3	Arl8a	5	5	20.1582	19.9797	0.052443	1.13173	1.13173	KO_1Way up vs WT_12mo	-1.00166	1.28294	0.178531	Arl8a	Arl8a	ADP-ribosylation factor-like 8A	Arl8a	68724	68724	1|1 E4	protein-coding	20.069	19.9797	20.1582	+0.5σ	20.0884	19.9047	20.0943	19.9586	19.8523	20.0804	20.2753	19.9557	20.21	20.2696
1154	283	P08556	Nras	5	5	18.6243	18.3047	0.0527225	1.24801	1.24801	KO_1Way up vs WT_12mo	-1.00332	1.5627	0.319629	Nras	Nras	neuroblastoma ras oncogene	Nras	18176	18176	3 F2.2|3 45.25 cM	protein-coding	18.4645	18.3047	18.6243	+1σ	18.5722	18.236	18.565	17.9189	18.2313	18.5084	18.4162	18.7856	18.678	18.7335
695	284	Q8R5J9	Arl6ip5	5	5	20.6341	20.4187	0.052749	1.16104	1.16104	KO_1Way up vs WT_12mo	-1.00226	1.35105	0.215414	Arl6ip5	Arl6ip5	ADP-ribosylation factor-like 6 interacting protein 5	Arl6ip5	65106	65106	6|6 D3	protein-coding	20.5264	20.4187	20.6341	+1σ	20.5928	20.4899	20.1986	20.294	20.5179	20.5449	20.5371	20.5308	20.7603	20.7973
1024	285	E9QN99	Abhd14b	5	5	19.4129	19.7258	0.0536675	0.804993	-1.24225	KO_1Way down vs WT_12mo	-1.54991	1.00436	-0.312951	Abhd14b	Abhd14b	abhydrolase domain containing 14b	Abhd14b	76491	76491	9|9 F1	protein-coding	19.5694	19.4129	19.7258	-1σ	19.8637	19.6504	20.0206	19.2851	19.8092	19.2354	19.3553	19.3847	19.5329	19.556
1327	286	Q9CZJ2	Hspa12b	5	5	19.2553	19.482	0.0541794	0.85458	-1.17017	KO_1Way down vs WT_12mo	-1.37421	1.00359	-0.226713	Hspa12b	Hspa12b	heat shock protein 12B	Hspa12b	72630	72630	2|2 F1	protein-coding	19.3686	19.2553	19.482	-1σ	19.5735	19.7207	19.4596	19.3537	19.3025	19.0515	19.3653	19.4243	19.254	19.1813
1562	287	Q07113	Igf2r	5	5	16.1397	16.584	0.0542565	0.734967	-1.3606	KO_1Way down vs WT_12mo	-1.86453	1.00718	-0.444248	Igf2r	Igf2r	insulin-like growth factor 2 receptor	Igf2r	16004	16004	17 A1|17 8.64 cM	protein-coding	16.3619	16.1397	16.584	-2σ	16.9659	16.2037	16.6973	16.5879	16.4651	16.1307	15.7998	15.8276	16.3518	16.5888
244	288	Q99LC3	Ndufa10	5	5	25.7649	25.847	0.0542886	0.944674	-1.05857	KO_1Way down vs WT_12mo	-1.12205	1.00133	-0.0821109	Ndufa10	Ndufa10	NADH:ubiquinone oxidoreductase subunit A10	Ndufa10	67273	67273	1|1 D	protein-coding	25.8059	25.7649	25.847	-0.5σ	25.8839	25.8217	25.9433	25.7749	25.8113	25.7928	25.7834	25.7731	25.7928	25.6823
1550	289	Q9WV91	Ptgfrn	5	5	18.1186	17.7602	0.0543396	1.28197	1.28197	KO_1Way up vs WT_12mo	-1.0059	1.65313	0.358359	Ptgfrn	Ptgfrn	prostaglandin F2 receptor negative regulator	Ptgfrn	19221	19221	3|3 F2.2	protein-coding	17.9394	17.7602	18.1186	+1σ	17.5941	17.9658	18.0486	17.252	17.9405	17.9257	18.0687	18.1831	18.2433	18.172
1040	290	G3X977	Itih2	5	5	18.559	18.3461	0.0547902	1.15905	1.15905	KO_1Way up vs WT_12mo	-1.00386	1.34858	0.212945	Itih2	Itih2	inter-alpha trypsin inhibitor, heavy chain 2	Itih2	16425	16425	2 A1|2 6.89 cM	protein-coding	18.4525	18.3461	18.559	+1σ	18.5766	18.2758	18.2482	18.4549	18.1749	18.7059	18.5179	18.5034	18.3871	18.6809
229	291	P14211	Calr	5	5	24.6615	24.4703	0.054858	1.14175	1.14175	KO_1Way up vs WT_12mo	-1.00351	1.30816	0.191241	Calr	Calr	calreticulin	Calr	12317	12317	8 C3|8 41.21 cM	protein-coding	24.5659	24.4703	24.6615	+1σ	24.5261	24.3931	24.3484	24.4428	24.6409	24.8355	24.6744	24.5708	24.7681	24.4587
670	292	Q9CRD0	Ociad1	5	5	20.8047	20.5471	0.0557125	1.19554	1.19554	KO_1Way up vs WT_12mo	-1.00555	1.43726	0.257668	Ociad1	Ociad1	OCIA domain containing 1	Ociad1	68095	68095	5|5 C3.2	protein-coding	20.6759	20.5471	20.8047	+1σ	20.6119	20.2837	20.5981	20.6527	20.5889	20.7603	20.4693	21.0217	20.9137	20.8585
1401	293	Q8BIW1	Prune1	5	5	15.9934	15.8514	0.0560713	1.10349	1.10349	KO_1Way up vs WT_12mo	-1.00324	1.22165	0.142076	Prune1	Prune1	prune exopolyphosphatase	Prune1	229589	229589	3|3 F2.1	protein-coding	15.9224	15.8514	15.9934	+0.5σ	15.8695	15.8878	15.7617	15.9389	15.7989	15.8276	16.1307	16.0988	15.9396	15.9705
566	294	G5E924	Hnrnpl	5	5	22.5872	22.4002	0.0567176	1.13833	1.13833	KO_1Way up vs WT_12mo	-1.00471	1.30189	0.186913	Hnrnpl	Hnrnpl	heterogeneous nuclear ribonucleoprotein L	Hnrnpl	15388	15388	7|7 B1	protein-coding	22.4937	22.4002	22.5872	+1σ	22.4117	22.3051	22.4178	22.4804	22.3862	22.4706	22.7644	22.3424	22.6394	22.719
1901	295	Q14B71	Cdca2	5	5	19.7	20.002	0.0567187	0.81112	-1.23286	KO_1Way down vs WT_12mo	-1.53155	1.00763	-0.302014	Cdca2	Cdca2	cell division cycle associated 2	Cdca2	108912	108912	14|14 D1	protein-coding	19.851	19.7	20.002	-1σ	20.0009	20.3256	19.8416	20.074	19.768	19.6061	19.6704	19.4288	19.9891	19.8057
330	296	P17742	Ppia	5	5	26.0638	25.8983	0.0570932	1.12155	1.12155	KO_1Way up vs WT_12mo	-1.0044	1.26341	0.165497	Ppia	Ppia	peptidylprolyl isomerase A	Ppia	268373	268373	11 A1|11 3.97 cM	protein-coding	25.981	25.8983	26.0638	+0.5σ	25.8217	25.8431	25.9557	25.7844	26.0867	26.0855	26.2115	26.0537	25.8968	26.0716
168	297	P01027	C3	5	5	25.9222	25.7128	0.0571183	1.15618	1.15618	KO_1Way up vs WT_12mo	-1.00559	1.34423	0.209371	C3	C3	complement component 3	C3	12266	12266	17 D|17 29.72 cM	protein-coding	25.8175	25.7128	25.9222	+1σ	25.5504	25.6962	25.7935	25.7305	25.7935	25.9936	25.7429	25.729	25.9781	26.1673
1213	298	Q8R1V4	Tmed4	5	5	19.2938	18.9619	0.057441	1.25867	1.25867	KO_1Way up vs WT_12mo	-1.00927	1.59892	0.331895	Tmed4	Tmed4	transmembrane p24 trafficking protein 4	Tmed4	103694	103694	11|11 A1	protein-coding	19.1278	18.9619	19.2938	+1σ	18.8021	18.8498	18.8688	19.3586	18.9301	19.4361	18.8939	19.5444	19.2993	19.2952
687	299	Q9CYT6	Cap2	5	5	21.5214	21.412	0.0575921	1.07876	1.07876	KO_1Way up vs WT_12mo	-1.0031	1.16734	0.109375	Cap2	Cap2	CAP, adenylate cyclase-associated protein, 2 (yeast)	Cap2	67252	67252	13|13 A5	protein-coding	21.4667	21.412	21.5214	+0.5σ	21.4782	21.4477	21.3761	21.2939	21.4641	21.5261	21.4425	21.4536	21.6384	21.5464
109	300	Q04857	Col6a1	5	5	26.0489	26.188	0.0577454	0.908099	-1.1012	KO_1Way down vs WT_12mo	-1.21753	1.00403	-0.139079	Col6a1	Col6a1	collagen, type VI, alpha 1	Col6a1	12833	12833	10 C1|10 39.71 cM	protein-coding	26.1184	26.0489	26.188	-0.5σ	26.2941	26.1323	26.1683	26.1323	26.213	25.962	26.0537	25.9127	26.0855	26.2306
853	301	P50516	Atp6v1a	5	5	19.6666	19.4096	0.0583901	1.19502	1.19502	KO_1Way up vs WT_12mo	-1.00806	1.43958	0.257035	Atp6v1a	Atp6v1a	ATPase, H+ transporting, lysosomal V1 subunit A	Atp6v1a	11964	11964	16|16 B4	protein-coding	19.5381	19.4096	19.6666	+1σ	19.5668	19.3082	19.1162	19.6739	19.383	19.7836	19.7237	19.5089	19.521	19.7959
1659	302	Q9CR00	Psmd9	5	5	18.2585	18.9053	0.0593177	0.638726	-1.56562	KO_1Way down vs WT_12mo	-2.50656	1.0226	-0.646732	Psmd9	Psmd9	proteasome (prosome, macropain) 26S subunit, non-ATPase, 9	Psmd9	67151	67151	5|5 F	protein-coding	18.5819	18.2585	18.9053	-2σ	19.319	18.5399	18.7967	18.6304	19.2404	18.8548	18.3319	18.5084	17.3609	18.2367
1218	303	O09167	Rpl21	5	5	21.7944	21.5805	0.0594607	1.15987	1.15987	KO_1Way up vs WT_12mo	-1.00753	1.35544	0.213969	Rpl21	Rpl21	ribosomal protein L21	Rpl21	19933	19933	5|5 G3	protein-coding	21.6874	21.5805	21.7944	+1σ	21.7368	21.7061	21.4599	21.5397	21.4599	21.9827	21.9012	21.8139	21.5314	21.7429
147	304	F8WID5	Tpm1	5	5	29.7148	29.77	0.0604701	0.962454	-1.03901	KO_1Way down vs WT_12mo	-1.08185	1.00214	-0.0552103	Tpm1	Tpm1	tropomyosin 1, alpha	Tpm1	22003	22003	9 C|9 36.27 cM	protein-coding	29.7424	29.7148	29.77	-0.5σ	29.8499	29.7846	29.7154	29.7846	29.7154	29.7148	29.7148	29.7148	29.7148	29.7148
1578	305	P46656	Fdx1	5	5	16.0854	15.7984	0.0609241	1.22006	1.22006	KO_1Way up vs WT_12mo	-1.01163	1.50586	0.286954	Fdx1	Fdx1	ferredoxin 1	Fdx1	14148	14148	9|9 A5.3	protein-coding	15.9419	15.7984	16.0854	+1σ	15.5351	15.8488	15.6302	15.9543	16.0236	15.8699	16.2046	16.2575	15.8494	16.2454
457	306	E9Q586	Dctn1	5	5	21.202	21.0291	0.0611321	1.12729	1.12729	KO_1Way up vs WT_12mo	-1.00712	1.27983	0.172862	Dctn1	Dctn1	dynactin 1	Dctn1	13191	13191	6 C3|6 35.94 cM	protein-coding	21.1155	21.0291	21.202	+0.5σ	21.0166	20.9214	21.1087	20.9856	21.1132	21.1266	21.4052	20.9831	21.2453	21.2496
1332	307	O55026	Entpd2	5	5	17.8051	17.3982	0.0620156	1.3258	1.3258	KO_1Way up vs WT_12mo	-1.01812	1.78959	0.406862	Entpd2	Entpd2	ectonucleoside triphosphate diphosphohydrolase 2	Entpd2	12496	12496	2|2 A3	protein-coding	17.6016	17.3982	17.8051	+2σ	17.835	17.3979	17.3604	17.6321	16.7658	17.8242	17.7374	17.6569	17.9786	17.8284
441	308	Q8BSY0	Asph	5	5	22.1312	22.2625	0.0621738	0.913011	-1.09528	KO_1Way down vs WT_12mo	-1.20669	1.00589	-0.131295	Asph	Asph	aspartate-beta-hydroxylase	Asph	65973	65973	4|4 A1	protein-coding	22.1969	22.1312	22.2625	-0.5σ	22.0941	22.3486	22.2873	22.2207	22.3618	22.2393	22.1501	22.0178	22.1398	22.109
1060	309	Q8R0N6	Adhfe1	5	5	19.1888	18.9039	0.0630899	1.21838	1.21838	KO_1Way up vs WT_12mo	-1.01374	1.50484	0.28496	Adhfe1	Adhfe1	alcohol dehydrogenase, iron containing, 1	Adhfe1	76187	76187	1|1 A2	protein-coding	19.0464	18.9039	19.1888	+1σ	18.9636	18.7634	18.9546	19.1244	18.7134	19.2472	19.5813	19.1032	19.0649	18.9476
1506	310	S4R1P5	Dst	5	5	18.6053	18.222	0.0632607	1.30432	1.30432	KO_1Way up vs WT_12mo	-1.01876	1.73318	0.3833	Dst	Dst	dystonin	Dst	13518	13518	1 B|1 12.91 cM	protein-coding	18.4137	18.222	18.6053	+2σ	18.3567	17.697	18.598	18.4679	17.9905	18.5476	18.6554	18.8324	18.5271	18.4643
555	311	P24549	Aldh1a1	5	5	21.7034	21.4989	0.0634687	1.15228	1.15228	KO_1Way up vs WT_12mo	-1.01012	1.34118	0.20449	Aldh1a1	Aldh1a1	aldehyde dehydrogenase family 1, subfamily A1	Aldh1a1	11668	11668	19 B|19 13.91 cM	protein-coding	21.6012	21.4989	21.7034	+1σ	21.4512	21.2553	21.6053	21.4323	21.7504	21.6659	21.8566	21.7231	21.5838	21.6876
216	312	P07901	Hsp90aa1	5	5	23.8045	23.6565	0.0636873	1.10807	1.10807	KO_1Way up vs WT_12mo	-1.00743	1.23695	0.148053	Hsp90aa1	Hsp90aa1	heat shock protein 90, alpha (cytosolic), class A member 1	Hsp90aa1	15519	15519	12 F1|12 60.75 cM	protein-coding	23.7305	23.6565	23.8045	+0.5σ	23.806	23.7018	23.6672	23.4524	23.655	23.8113	23.8751	23.6801	23.769	23.8872
1292	313	Q9ER00	Stx12	5	5	16.9138	17.255	0.0640496	0.789382	-1.26681	KO_1Way down vs WT_12mo	-1.63312	1.01764	-0.341204	Stx12	Stx12	syntaxin 12	Stx12	100226	100226	4 D2.3|4 66.01 cM	protein-coding	17.0844	16.9138	17.255	-1σ	17.697	17.3499	16.9118	17.0554	17.261	17.2209	16.8764	16.9237	16.7106	16.8374
1579	314	Q5SRX1	Tom1l2	5	5	17.4334	17.679	0.0641643	0.843464	-1.18559	KO_1Way down vs WT_12mo	-1.42356	1.01277	-0.245601	Tom1l2	Tom1l2	target of myb1-like 2 (chicken)	Tom1l2	216810	216810	11|11 B2	protein-coding	17.5562	17.4334	17.679	-1σ	17.5759	17.4093	17.8959	17.8397	17.6743	17.3428	17.3208	17.3753	17.4105	17.7178
1521	315	Q9CXT8	Pmpcb	5	5	19.9457	20.1035	0.0643105	0.896418	-1.11555	KO_1Way down vs WT_12mo	-1.25474	1.00826	-0.157757	Pmpcb	Pmpcb	peptidase (mitochondrial processing) beta	Pmpcb	73078	73078	5|5 A3	protein-coding	20.0246	19.9457	20.1035	-0.5σ	20.2064	20.1771	20.1081	20.1485	19.8773	19.8112	19.916	20.0858	19.9499	19.9657
300	316	P17156	Hspa2	5	5	20.3748	19.3744	0.0646079	2.00057	2.00057	KO_1Way up vs WT_12mo	-1.05465	4.22101	1.00041	Hspa2	Hspa2	heat shock protein 2	Hspa2	15512	15512	12 C3|12 33.73 cM	protein-coding	19.8746	19.3744	20.3748	+3σ	18.2258	20.2199	20.314	18.3343	19.778	20.5119	20.2261	20.0534	20.5796	20.503
507	317	Q91VK2	Eef1d	5	5	22.4433	22.308	0.0647798	1.09832	1.09832	KO_1Way up vs WT_12mo	-1.0073	1.21512	0.135303	Eef1d	Eef1d	eukaryotic translation elongation factor 1 delta (guanine nucleotide exchange protein)	Eef1d	66656	66656	15|15 D3	protein-coding	22.3757	22.308	22.4433	+0.5σ	22.3677	22.2512	22.3862	22.2652	22.2696	22.4156	22.5981	22.2577	22.5103	22.4348
1979	318	A0A0R4J078	Ubxn4	5	5	17.7934	17.4409	0.0648472	1.27671	1.27671	KO_1Way up vs WT_12mo	-1.01922	1.66132	0.352433	Ubxn4	Ubxn4	UBX domain protein 4	Ubxn4	67812	67812	1|1 E3	protein-coding	17.6171	17.4409	17.7934	+1σ	17.6159	17.737	17.2768	17.2983	17.2768	17.6569	17.3504	17.9914	17.8758	18.0924
794	319	P62843	Rps15	5	5	19.5242	19.8041	0.0652494	0.823669	-1.21408	KO_1Way down vs WT_12mo	-1.49702	1.01563	-0.279864	Rps15	Rps15	ribosomal protein S15	Rps15	20054	20054	10|10 C1	protein-coding	19.6641	19.5242	19.8041	-1σ	19.8163	20.016	19.5541	19.8832	19.751	19.6756	19.7695	19.4895	19.1468	19.5398
705	320	Q8K411	Pitrm1	5	5	20.9067	21.0129	0.065337	0.929014	-1.07641	KO_1Way down vs WT_12mo	-1.16553	1.00593	-0.106227	Pitrm1	Pitrm1	pitrilysin metallepetidase 1	Pitrm1	69617	69617	13|13 A1	protein-coding	20.9598	20.9067	21.0129	-0.5σ	20.9967	20.9812	20.9812	21.0081	21.0975	20.9057	20.8944	20.8039	20.8585	21.0711
1536	321	G3X972	Sec24c	5	5	16.4462	16.2275	0.0658981	1.16372	1.16372	KO_1Way up vs WT_12mo	-1.01269	1.37142	0.218739	Sec24c	Sec24c	Sec24 related gene family, member C (S. cerevisiae)	Sec24c	218811	218811	14|14 A3	protein-coding	16.3368	16.2275	16.4462	+1σ	16.0982	16.454	16.273	16.273	16.0391	16.3039	16.2737	16.4349	16.601	16.6175
1958	322	Q9DBB1	Dusp6	5	5	17.1577	17.5573	0.0665142	0.758078	-1.31913	KO_1Way down vs WT_12mo	-1.78214	1.02416	-0.399581	Dusp6	Dusp6	dual specificity phosphatase 6	Dusp6	67603	67603	10|10 D1	protein-coding	17.3575	17.1577	17.5573	-2σ	17.6495	17.9138	17.5313	17.0306	17.6613	17.5036	16.888	17.2473	17.2617	16.888
716	323	A0A140T8L1	Rpl7a-ps3	5	5	22.9647	23.1148	0.0670279	0.901197	-1.10964	KO_1Way down vs WT_12mo	-1.24271	1.00927	-0.150086	Rpl7a-ps3	Rpl7a-ps3	ribosomal protein L7A, pseudogene 3	Rpl7a-ps3	268795	268795	15|15 B3.1	pseudo	23.0398	22.9647	23.1148	-0.5σ	23.2807	23.0701	23.0701	23.1034	23.0496	23.075	22.8669	22.8155	23.1079	22.9582
899	324	P97429	Anxa4	5	5	20.7545	20.8655	0.0670803	0.925949	-1.07997	KO_1Way down vs WT_12mo	-1.17435	1.00687	-0.110995	Anxa4	Anxa4	annexin A4	Anxa4	11746	11746	6 D1|6 37.75 cM	protein-coding	20.81	20.7545	20.8655	-0.5σ	20.9214	20.8556	20.8965	20.9078	20.746	20.8692	20.7204	20.7715	20.7932	20.6181
1252	325	Q9QZB7	Actr10	5	5	15.4482	15.182	0.0674487	1.20262	1.20262	KO_1Way up vs WT_12mo	-1.0169	1.47073	0.266182	Actr10	Actr10	ARP10 actin-related protein 10	Actr10	56444	56444	12|12 C2	protein-coding	15.3151	15.182	15.4482	+1σ	15.4985	14.9599	15.0783	15.2103	15.1628	15.1633	15.4096	15.6842	15.4096	15.574
811	326	A0A1B0GSG5	Rnh1	5	5	18.3053	18.7213	0.0677294	0.749516	-1.33419	KO_1Way down vs WT_12mo	-1.82802	1.02694	-0.415969	Rnh1	Rnh1	ribonuclease/angiogenin inhibitor 1	Rnh1	107702	107702	7|7 F5	protein-coding	18.5133	18.3053	18.7213	-2σ	18.4741	18.6104	18.3213	18.7731	19.4274	18.1925	18.4599	18.3383	18.2925	18.2433
936	327	Q78IK2	Atp5md	5	5	25.3662	25.4706	0.0679372	0.930187	-1.07505	KO_1Way down vs WT_12mo	-1.16356	1.00677	-0.104408	Atp5md	Atp5md	ATP synthase membrane subunit DAPIT	Atp5md	66477	66477	19|19 C3	protein-coding	25.4184	25.3662	25.4706	-0.5σ	25.4499	25.5372	25.5	25.5128	25.3531	25.2367	25.3649	25.4287	25.4486	25.352
1137	328	Q9Z204	Hnrnpc	5	5	20.0649	20.2722	0.0682189	0.866132	-1.15456	KO_1Way down vs WT_12mo	-1.35125	1.01369	-0.207341	Hnrnpc	Hnrnpc	heterogeneous nuclear ribonucleoprotein C	Hnrnpc	15381	15381	14 C2|14 26.79 cM	protein-coding	20.1685	20.0649	20.2722	-1σ	20.38	20.3297	19.9226	20.273	20.4557	20.1041	19.9988	20.179	20.0307	20.0119
998	329	Q9Z1W9	Stk39	5	5	19.0628	18.8502	0.0688565	1.15877	1.15877	KO_1Way up vs WT_12mo	-1.0145	1.36222	0.212593	Stk39	Stk39	serine/threonine kinase 39	Stk39	53416	53416	2|2 C1.3	protein-coding	18.9565	18.8502	19.0628	+1σ	18.9819	18.6249	18.7513	18.9728	18.9199	19.1743	19.271	18.8594	19.0443	18.9649
1274	330	O88543	Cops3	5	5	19.4238	19.1619	0.0693606	1.19908	1.19908	KO_1Way up vs WT_12mo	-1.01835	1.46417	0.261923	Cops3	Cops3	COP9 signalosome subunit 3	Cops3	26572	26572	11|11 B1.3	protein-coding	19.2929	19.1619	19.4238	+1σ	18.8688	19.319	19.253	19.435	18.9337	19.3308	19.2609	19.5493	19.5493	19.4288
158	331	Q7TPR4	Actn1	5	5	19.7202	19.3673	0.0695018	1.27718	1.27718	KO_1Way up vs WT_12mo	-1.02498	1.67194	0.352963	Actn1	Actn1	actinin, alpha 1	Actn1	109711	109711	12 C3|12 36.49 cM	protein-coding	19.5437	19.3673	19.7202	+1σ	19.1509	19.1764	19.4881	19.3793	19.6417	19.8953	19.9244	19.521	19.2654	19.9951
399	332	Q2TPA8	Hsdl2	5	5	22.4099	22.5645	0.070209	0.898419	-1.11307	KO_1Way down vs WT_12mo	-1.25283	1.01123	-0.15454	Hsdl2	Hsdl2	hydroxysteroid dehydrogenase like 2	Hsdl2	72479	72479	4|4 B3	protein-coding	22.4872	22.4099	22.5645	-0.5σ	22.7579	22.5592	22.4045	22.5924	22.5084	22.4752	22.3557	22.4472	22.5139	22.2577
480	333	P23242	Gja1	5	5	22.2288	22.6682	0.0702253	0.737445	-1.35603	KO_1Way down vs WT_12mo	-1.89821	1.03229	-0.439393	Gja1	Gja1	gap junction protein, alpha 1	Gja1	14609	14609	10 B4|10 28.64 cM	protein-coding	22.4485	22.2288	22.6682	-2σ	23.0764	22.7146	22.5743	22.1364	22.8391	22.2684	22.192	22.1501	22.7048	21.8285
821	334	P35980	Rpl18	5	5	23.3188	23.3985	0.0707843	0.946249	-1.0568	KO_1Way down vs WT_12mo	-1.12346	1.00593	-0.0797078	Rpl18	Rpl18	ribosomal protein L18	Rpl18	19899	19899	7|7 B3	protein-coding	23.3587	23.3188	23.3985	-0.5σ	23.519	23.3938	23.3106	23.4283	23.341	23.3566	23.291	23.3026	23.335	23.3089
1003	335	P38060	Hmgcl	5	5	18.4741	18.1488	0.0708207	1.2529	1.2529	KO_1Way up vs WT_12mo	-1.02447	1.60817	0.325271	Hmgcl	Hmgcl	3-hydroxy-3-methylglutaryl-Coenzyme A lyase	Hmgcl	15356	15356	4 D3|4 68.14 cM	protein-coding	18.3115	18.1488	18.4741	+1σ	18.2425	18.0395	18.0964	18.2064	18.1592	18.1978	18.3349	18.3121	18.4692	19.0563
223	336	P50462	Csrp3	5	5	26.8681	26.7441	0.0715205	1.08978	1.08978	KO_1Way up vs WT_12mo	-1.00955	1.19896	0.124035	Csrp3	Csrp3	cysteine and glycine-rich protein 3	Csrp3	13009	13009	7|7 B4	protein-coding	26.8061	26.7441	26.8681	+0.5σ	26.5995	26.7865	26.8032	26.728	26.8032	26.8179	26.8795	27.0397	26.7855	26.8179
1152	337	Q99KF1	Tmed9	5	5	19.0247	18.7784	0.0721161	1.18616	1.18616	KO_1Way up vs WT_12mo	-1.01956	1.4345	0.246302	Tmed9	Tmed9	transmembrane p24 trafficking protein 9	Tmed9	67511	67511	13|13 B1	protein-coding	18.9016	18.7784	19.0247	+1σ	18.8971	18.8688	18.7841	18.598	18.7442	19.1317	19.1257	18.9873	19.2472	18.6318
873	338	Q99LF4	Rtcb	5	5	20.8792	20.7139	0.0726435	1.12141	1.12141	KO_1Way up vs WT_12mo	-1.01338	1.27438	0.165309	Rtcb	Rtcb	RNA 2',3'-cyclic phosphate and 5'-OH ligase	Rtcb	28088	28088	10 C1|10 41.81 cM	protein-coding	20.7965	20.7139	20.8792	+0.5σ	20.8025	20.6312	20.8447	20.5634	20.7276	20.9466	20.7838	20.9998	20.6899	20.9759
1940	339	Q811D0	Dlg1	5	5	20.0278	19.4369	0.0738835	1.50613	1.50613	KO_1Way up vs WT_12mo	-1.0512	2.38457	0.590848	Dlg1	Dlg1	discs large MAGUK scaffold protein 1	Dlg1	13383	13383	16 B2|16 22.4 cM	protein-coding	19.7324	19.4369	20.0278	+2σ	19.1734	19.1092	20.0335	20.136	18.7325	20.2962	19.9008	19.8447	20.1279	19.9693
992	340	P60603	Romo1	5	5	20.546	20.7517	0.0742229	0.867102	-1.15327	KO_1Way down vs WT_12mo	-1.35366	1.01777	-0.205726	Romo1	Romo1	reactive oxygen species modulator 1	Romo1	67067	67067	2|2 H1	protein-coding	20.6488	20.546	20.7517	-1σ	20.7425	20.9907	20.5764	20.8917	20.5575	20.5946	20.5907	20.6462	20.5554	20.3431
1334	341	Q9D967	Mdp1	5	5	17.1634	17.3715	0.0745065	0.865703	-1.15513	KO_1Way down vs WT_12mo	-1.35857	1.01817	-0.208056	Mdp1	Mdp1	magnesium-dependent phosphatase 1	Mdp1	67881	67881	14|14 C3	protein-coding	17.2675	17.1634	17.3715	-1σ	17.1203	17.5604	17.3551	17.3979	17.4238	16.9667	17.097	17.1096	17.3821	17.2617
999	342	P70452	Stx4a	5	5	17.7875	17.4928	0.0750024	1.22661	1.22661	KO_1Way up vs WT_12mo	-1.02633	1.54418	0.294675	Stx4a	Stx4a	syntaxin 4A (placental)	Stx4a	20909	20909	7|7 F3	protein-coding	17.6401	17.4928	17.7875	+1σ	17.261	17.6903	17.7335	17.4813	17.2983	17.6251	17.6251	17.691	18.1925	17.8038
207	343	P48036	Anxa5	5	5	25.4633	25.3456	0.0757278	1.08502	1.08502	KO_1Way up vs WT_12mo	-1.01072	1.18988	0.11772	Anxa5	Anxa5	annexin A5	Anxa5	11747	11747	3 B|3 17.46 cM	protein-coding	25.4045	25.3456	25.4633	+0.5σ	25.3665	25.2726	25.3316	25.3531	25.4042	25.4377	25.5692	25.4026	25.3096	25.5974
1041	344	E9PYF4	Lmo7	5	5	19.9526	20.1167	0.0764592	0.89243	-1.12054	KO_1Way down vs WT_12mo	-1.27491	1.01538	-0.16419	Lmo7	Lmo7	LIM domain only 7	Lmo7	380928	380928	14 E2.3|14 50.9 cM	protein-coding	20.0346	19.9526	20.1167	-0.5σ	20.299	20.1916	19.9726	20.1731	19.9475	20.069	19.888	19.9951	19.992	19.8187
1361	345	P62858	Rps28	5	5	21.7539	21.6578	0.0765923	1.06885	1.06885	KO_1Way up vs WT_12mo	-1.00901	1.15275	0.0960658	Rps28	Rps28	ribosomal protein S28	Rps28	54127	54127	17|17 B1	protein-coding	21.7059	21.6578	21.7539	+0.5σ	21.7347	21.7399	21.6199	21.5986	21.5961	21.8403	21.6721	21.6993	21.8285	21.7293
258	346	Q8BTM8	Flna	5	5	22.035	21.8679	0.0766667	1.12281	1.12281	KO_1Way up vs WT_12mo	-1.01577	1.28058	0.167114	Flna	Flna	filamin, alpha	Flna	192176	192176	X A7.3|X 37.89 cM	protein-coding	21.9515	21.8679	22.035	+0.5σ	21.9756	21.7504	21.8841	21.9946	21.7347	21.882	22.1562	22.0236	21.9211	22.192
1134	347	Q9Z0P5	Twf2	5	5	19.3811	19.1607	0.0767053	1.16503	1.16503	KO_1Way up vs WT_12mo	-1.02087	1.38563	0.220367	Twf2	Twf2	twinfilin actin binding protein 2	Twf2	23999	23999	9|9 F1	protein-coding	19.2709	19.1607	19.3811	+1σ	19.0551	18.9594	19.1613	19.2234	19.4044	19.3847	19.3601	19.1288	19.4161	19.6158
1099	348	O35864	Cops5	5	5	20.5123	20.105	0.0770099	1.32622	1.32622	KO_1Way up vs WT_12mo	-1.03934	1.82805	0.407318	Cops5	Cops5	COP9 signalosome subunit 5	Cops5	26754	26754	1 A2|1 2.29 cM	protein-coding	20.3087	20.105	20.5123	+2σ	20.3848	19.8832	20.136	19.8163	20.3049	20.9407	20.2962	20.8887	20.2861	20.1499
434	349	Q9CPY7	Lap3	5	5	22.2599	22.3712	0.0785578	0.925784	-1.08017	KO_1Way down vs WT_12mo	-1.17978	1.01116	-0.111252	Lap3	Lap3	leucine aminopeptidase 3	Lap3	66988	66988	5 B3|5 24.98 cM	protein-coding	22.3156	22.2599	22.3712	-0.5σ	22.4804	22.4721	22.3304	22.3141	22.2588	22.3514	22.2982	22.2762	22.2022	22.1715
135	350	A0A1L1SV25	Actn4	5	5	23.5958	23.4158	0.0790624	1.13284	1.13284	KO_1Way up vs WT_12mo	-1.01841	1.30695	0.179942	Actn4	Actn4	actinin alpha 4	Actn4	60595	60595	7|7 B1	protein-coding	23.5058	23.4158	23.5958	+0.5σ	23.4283	23.4013	23.4228	23.1861	23.6407	23.7286	23.5272	23.4272	23.6479	23.6479
459	351	Q60714	Slc27a1	5	5	21.4104	21.2606	0.0791105	1.10946	1.10946	KO_1Way up vs WT_12mo	-1.01533	1.24977	0.149855	Slc27a1	Slc27a1	solute carrier family 27 (fatty acid transporter), member 1	Slc27a1	26457	26457	8|8 B3.3	protein-coding	21.3355	21.2606	21.4104	+0.5σ	21.4365	21.3106	21.2426	21.0308	21.2823	21.2921	21.4087	21.4944	21.4624	21.3945
940	352	Q9R112	Sqor	5	5	20.8598	21.1814	0.0794433	0.800214	-1.24967	KO_1Way down vs WT_12mo	-1.61405	1.03354	-0.321542	Sqor	Sqor	sulfide quinone oxidoreductase	Sqor	59010	59010	2|2 E5	protein-coding	21.0206	20.8598	21.1814	-1σ	21.2293	21.5236	21.4066	20.9119	20.8353	20.902	21.0329	20.8257	20.9937	20.5449
50	353	A0A0A0MQF6	Gapdh	5	5	29.8658	29.7838	0.080316	1.05849	1.05849	KO_1Way up vs WT_12mo	-1.00868	1.13012	0.0820024	Gapdh	Gapdh	glyceraldehyde-3-phosphate dehydrogenase	Gapdh	14433	14433	6 F2|6 59.32 cM	protein-coding	29.8248	29.7838	29.8658	+0.5σ	29.7846	29.8499	29.7846	29.7154	29.7846	29.8495	29.9964	29.7842	29.8495	29.8495
297	354	P68040	Rack1	5	5	23.4319	23.3599	0.0807777	1.05114	1.05114	KO_1Way up vs WT_12mo	-1.00772	1.11342	0.0719509	Rack1	Rack1	receptor for activated C kinase 1	Rack1	14694	14694	11|11 B1.2	protein-coding	23.3959	23.3599	23.4319	+0.5σ	23.3735	23.3629	23.4417	23.2727	23.3489	23.3618	23.4155	23.4399	23.4325	23.5098
1114	355	G3UXF4	Ank1	5	5	20.6992	20.3118	0.0809647	1.30806	1.30806	KO_1Way up vs WT_12mo	-1.04252	1.78379	0.387432	Ank1	Ank1	ankyrin 1, erythroid	Ank1	11733	11733	8 A2|8 11.42 cM	protein-coding	20.5055	20.3118	20.6992	+2σ	20.1193	20.4069	20.1731	20.1916	20.6682	20.9706	20.6609	20.91	20.0721	20.8825
1665	356	Q3UXS0	Scamp3	5	5	18.4934	18.1055	0.0810438	1.30849	1.30849	KO_1Way up vs WT_12mo	-1.04268	1.78521	0.387898	Scamp3	Scamp3	secretory carrier membrane protein 3	Scamp3	24045	24045	3|3 F1	protein-coding	18.2995	18.1055	18.4934	+2σ	18.3058	18.2258	17.6159	18.0486	18.3314	18.6497	17.9257	18.6606	18.5813	18.6497
787	357	E9QK41	Ablim1	5	5	21.3302	21.5483	0.0810959	0.859684	-1.16322	KO_1Way down vs WT_12mo	-1.3853	1.02382	-0.218121	Ablim1	Ablim1	actin-binding LIM protein 1	Ablim1	226251	226251	19 D2|19 52.09 cM	protein-coding	21.4393	21.3302	21.5483	-1σ	21.8731	21.3761	21.5199	21.609	21.3635	21.1112	21.3501	21.3501	21.4343	21.4052
1468	358	E9QJW0	Mgst1	5	5	18.9479	19.2782	0.0816308	0.795352	-1.2573	KO_1Way down vs WT_12mo	-1.63911	1.03687	-0.330334	Mgst1	Mgst1	microsomal glutathione S-transferase 1	Mgst1	56615	56615	6|6 G1	protein-coding	19.1131	18.9479	19.2782	-1σ	19.9047	19.0589	19.0434	19.1509	19.2333	19.0023	18.7919	19.0405	18.9351	18.9698
1411	359	P63325	Rps10	5	5	21.6486	21.5298	0.0819487	1.08589	1.08589	KO_1Way up vs WT_12mo	-1.01324	1.19477	0.118882	Rps10	Rps10	ribosomal protein S10	Rps10	67097	67097	17|17 A3.3	protein-coding	21.5892	21.5298	21.6486	+0.5σ	21.5282	21.4782	21.609	21.4405	21.593	21.8175	21.6313	21.5951	21.5157	21.6836
228	360	Q9JHI5	Ivd	5	5	25.5286	25.5912	0.0822954	0.95754	-1.04434	KO_1Way down vs WT_12mo	-1.09831	1.00702	-0.0625954	Ivd	Ivd	isovaleryl coenzyme A dehydrogenase	Ivd	56357	56357	2|2 E5	protein-coding	25.5599	25.5286	25.5912	-0.5σ	25.5128	25.6242	25.5847	25.684	25.5504	25.5489	25.5603	25.5113	25.5113	25.5113
796	361	Q9Z1N5	Ddx39b	5	5	22.1544	21.9438	0.0824592	1.15717	1.15717	KO_1Way up vs WT_12mo	-1.02392	1.37108	0.210605	Ddx39b	Ddx39b	DEAD box helicase 39b	Ddx39b	53817	53817	17 B1|17 18.6 cM	protein-coding	22.0491	21.9438	22.1544	+1σ	22.084	21.7148	21.9844	21.8245	22.1111	22.2238	21.8867	22.3339	22.1501	22.1773
1896	362	Q8VD12	Zfp385a	5	5	16.2063	17.1918	0.0827056	0.505048	-1.98001	KO_1Way down vs WT_12mo	-4.38242	1.11784	-0.985507	Zfp385a	Zfp385a	zinc finger protein 385A	Zfp385a	29813	29813	15|15 F3	protein-coding	16.699	16.2063	17.1918	-3σ	18.4149	15.5351	17.288	17.7424	16.9787	16.1814	15.8885	16.1435	16.1307	16.6874
405	363	Q9DCL9	Paics	5	5	21.7525	21.6439	0.0834091	1.07819	1.07819	KO_1Way up vs WT_12mo	-1.0126	1.17715	0.108618	Paics	Paics	phosphoribosylaminoimidazole carboxylase, phosphoribosylaminoribosylaminoimidazole, succinocarboxamide synthetase	Paics	67054	67054	5|5 C3.3	protein-coding	21.6982	21.6439	21.7525	+0.5σ	21.6419	21.6687	21.656	21.6287	21.6242	21.68	21.8348	21.8056	21.576	21.8663
1295	364	O54984	Get3	5	5	18.3967	18.1655	0.0838458	1.17386	1.17386	KO_1Way up vs WT_12mo	-1.02734	1.41562	0.23126	Get3	Get3	guided entry of tail-anchored proteins factor 3, ATPase	Get3	56495	56495	8|8 C3	protein-coding	18.2811	18.1655	18.3967	+1σ	18.3457	17.8278	18.1228	18.459	18.0721	18.2769	18.4476	18.4305	18.3349	18.4938
585	365	P62962	Pfn1	5	5	24.3117	24.196	0.0842446	1.08354	1.08354	KO_1Way up vs WT_12mo	-1.01374	1.19019	0.115752	Pfn1	Pfn1	profilin 1	Pfn1	18643	18643	11 B3|11 43.21 cM	protein-coding	24.2538	24.196	24.3117	+0.5σ	24.1514	24.0376	24.3159	24.2375	24.2375	24.2163	24.4322	24.2916	24.3142	24.3044
799	366	Q6ZWV3	Rpl10	5	5	21.7568	21.602	0.0846009	1.11328	1.11328	KO_1Way up vs WT_12mo	-1.0186	1.26244	0.154812	Rpl10	Rpl10	ribosomal protein L10	Rpl10	110954	110954	X A7.3|X 37.94 cM	protein-coding	21.6794	21.602	21.7568	+0.5σ	21.5004	21.5341	21.7504	21.4641	21.7612	21.7744	21.7082	21.6659	21.7082	21.9275
520	367	F7CVJ5	Ahnak2	5	5	22.0036	21.8027	0.0849817	1.14941	1.14941	KO_1Way up vs WT_12mo	-1.02445	1.35343	0.200888	Ahnak2	Ahnak2	AHNAK nucleoprotein 2	Ahnak2	100041194	100041194	12|12 F1	protein-coding	21.9032	21.8027	22.0036	+1σ	22.0438	21.593	21.6916	21.7968	21.8884	21.9785	21.8093	22.1975	22.09	21.9427
1416	368	E9Q8Z8	Ctnnd1	5	5	18.0594	17.655	0.0850626	1.32351	1.32351	KO_1Way up vs WT_12mo	-1.04993	1.83915	0.404374	Ctnnd1	Ctnnd1	catenin (cadherin associated protein), delta 1	Ctnnd1	12388	12388	2 D|2 49.45 cM	protein-coding	17.8572	17.655	18.0594	+2σ	17.6903	16.9659	17.8825	17.6743	18.0623	17.897	18.172	18.0799	18.3121	17.8359
875	369	P21460	Cst3	5	5	22.1475	22.2715	0.0860444	0.917649	-1.08974	KO_1Way down vs WT_12mo	-1.20587	1.01544	-0.123986	Cst3	Cst3	cystatin C	Cst3	13010	13010	2 G3|2 73.6 cM	protein-coding	22.2095	22.1475	22.2715	-0.5σ	22.4	22.2588	22.2039	22.146	22.3486	22.1872	22.0742	22.2982	22.109	22.0687
367	370	Q9WUM5	Suclg1	5	5	25.0514	25.156	0.0861867	0.930035	-1.07523	KO_1Way down vs WT_12mo	-1.17122	1.01306	-0.104643	Suclg1	Suclg1	succinate-CoA ligase, GDP-forming, alpha subunit	Suclg1	56451	56451	6|6 C1	protein-coding	25.1037	25.0514	25.156	-0.5σ	25.1185	25.1314	25.1391	25.1185	25.2726	25.2013	24.9349	25.0814	25.0418	24.9975
360	371	Q9DBG6	Rpn2	5	5	22.5767	22.4272	0.0864129	1.10921	1.10921	KO_1Way up vs WT_12mo	-1.01883	1.25351	0.149532	Rpn2	Rpn2	ribophorin II	Rpn2	20014	20014	2 H1|2 78.2 cM	protein-coding	22.502	22.4272	22.5767	+0.5σ	22.4927	22.4614	22.4234	22.5592	22.1991	22.6131	22.5177	22.6057	22.7086	22.4384
437	372	P42125	Eci1	5	5	24.5593	24.6678	0.0871581	0.9276	-1.07805	KO_1Way down vs WT_12mo	-1.17832	1.01387	-0.108425	Eci1	Eci1	enoyl-Coenzyme A delta isomerase 1	Eci1	13177	13177	17|17 A3.3	protein-coding	24.6136	24.5593	24.6678	-0.5σ	24.6654	24.676	24.676	24.7882	24.5333	24.4415	24.5574	24.5574	24.683	24.5574
691	373	Q3UNZ8	Cryzl2	5	5	19.1218	18.9158	0.0878025	1.15351	1.15351	KO_1Way up vs WT_12mo	-1.02695	1.36646	0.206036	Cryzl2	Cryzl2	crystallin zeta like 2	Cryzl2	226527	226527	1|1 H1	protein-coding	19.0188	18.9158	19.1218	+1σ	18.8355	18.7513	19.2496	18.7095	19.0331	19.0602	19.1774	19.1712	19.1813	19.0191
1738	374	Q9DB16	Cab39l	5	5	17.4148	17.0487	0.0881972	1.2889	1.2889	KO_1Way up vs WT_12mo	-1.04887	1.74244	0.366138	Cab39l	Cab39l	calcium binding protein 39-like	Cab39l	69008	69008	14|14 C3	protein-coding	17.2318	17.0487	17.4148	+2σ	17.247	16.8367	16.5879	16.9659	17.606	17.5198	17.4322	17.3428	17.5895	17.1899
1030	375	Q7TQI3	Otub1	5	5	20.1388	19.9985	0.0911866	1.10213	1.10213	KO_1Way up vs WT_12mo	-1.01977	1.23871	0.140296	Otub1	Otub1	OTU domain, ubiquitin aldehyde binding 1	Otub1	107260	107260	19|19 A	protein-coding	20.0687	19.9985	20.1388	+0.5σ	19.7563	19.9274	20.1521	20.0784	20.0784	20.0721	20.1384	20.1747	20.1704	20.1384
1246	376	Q9D6J5	Ndufb8	5	5	18.1394	18.3648	0.091698	0.855374	-1.16908	KO_1Way down vs WT_12mo	-1.41092	1.03232	-0.225372	Ndufb8	Ndufb8	NADH:ubiquinone oxidoreductase subunit B8	Ndufb8	67264	67264	19|19 C3	protein-coding	18.2521	18.1394	18.3648	-1σ	18.0681	18.5615	18.4819	18.2198	18.4928	18.3221	18.2268	17.9198	18.179	18.0494
1179	377	A0A1Y7VN19	Dhrs7	5	5	18.068	18.352	0.0919908	0.821346	-1.21751	KO_1Way down vs WT_12mo	-1.54335	1.04116	-0.283937	Dhrs7	Dhrs7	dehydrogenase/reductase (SDR family) member 7	Dhrs7	66375	66375	12|12 C3	protein-coding	18.21	18.068	18.352	-1σ	18.1474	18.4872	18.4469	18.0331	18.6453	18.1132	18.3906	17.8151	17.9526	18.0687
454	378	A2AKU9	Atp5c1	5	5	27.2065	27.3508	0.0924841	0.904825	-1.10519	KO_1Way down vs WT_12mo	-1.247	1.02093	-0.144289	Atp5c1	Atp5c1	ATP synthase, H+ transporting, mitochondrial F1 complex, gamma polypeptide 1	Atp5c1	11949	11949	2|2 A1	protein-coding	27.2786	27.2065	27.3508	-0.5σ	27.4852	27.3607	27.2395	27.4678	27.2008	27.3586	27.1047	27.2653	27.1047	27.1994
108	379	Q3U2G2	Hspa4	5	5	24.1731	24.0801	0.0926953	1.06655	1.06655	KO_1Way up vs WT_12mo	-1.0135	1.15288	0.0929542	Hspa4	Hspa4	heat shock protein 4	Hspa4	15525	15525	11 B1.3|11 31.91 cM	protein-coding	24.1266	24.0801	24.1731	+0.5σ	24.0641	24.0138	24.1337	24.0376	24.1514	24.2266	24.2916	24.0996	24.0698	24.1778
1626	380	Q9WV54	Asah1	5	5	19.7776	19.8979	0.0929807	0.92002	-1.08693	KO_1Way down vs WT_12mo	-1.20222	1.0176	-0.120263	Asah1	Asah1	N-acylsphingosine amidohydrolase 1	Asah1	11886	11886	8|8 A4	protein-coding	19.8377	19.7776	19.8979	-0.5σ	19.991	19.7725	19.8678	19.8903	19.9679	19.9244	19.6229	19.8187	19.7891	19.7329
874	381	P19001	Krt19	5	5	18.4353	18.1608	0.0931537	1.20957	1.20957	KO_1Way up vs WT_12mo	-1.04078	1.52272	0.27449	Krt19	Krt19	keratin 19	Krt19	16669	16669	11 D|11 63.42 cM	protein-coding	18.298	18.1608	18.4353	+1σ	17.9905	17.9189	18.3165	18.215	18.3629	18.5951	18.3464	18.2209	18.7983	18.2157
864	382	P03893	ND2	5	5	23.1087	22.9999	0.0935424	1.07833	1.07833	KO_1Way up vs WT_12mo	-1.0161	1.18151	0.108794	ND2	ND2	NADH dehydrogenase subunit 2	mt-Nd2	17717	17717	-	protein-coding	23.0543	22.9999	23.1087	+0.5σ	23.0151	23.1717	23.0257	22.8911	22.8959	23.1562	23.043	23.176	23.0812	23.0871
1043	383	P82350	Sgca	5	5	22.9251	23.0292	0.0936951	0.93041	-1.07479	KO_1Way down vs WT_12mo	-1.17302	1.01544	-0.104061	Sgca	Sgca	sarcoglycan, alpha (dystrophin-associated glycoprotein)	Sgca	20391	20391	11|11 D	protein-coding	22.9772	22.9251	23.0292	-0.5σ	23.0884	23.1034	23.0151	22.8687	23.0701	22.9399	22.9289	22.9708	22.99	22.7958
364	384	Q8K009	Aldh1l2	5	5	22.3246	22.1677	0.0952506	1.11489	1.11489	KO_1Way up vs WT_12mo	-1.02414	1.27299	0.156904	Aldh1l2	Aldh1l2	aldehyde dehydrogenase 1 family, member L2	Aldh1l2	216188	216188	10|10 C1	protein-coding	22.2462	22.1677	22.3246	+0.5σ	22.0648	22.0707	22.209	22.4	22.0941	22.4472	22.3177	22.4156	22.1444	22.2982
1348	385	Q9CQZ6	Ndufb3	5	5	20.9935	20.8306	0.0954146	1.1195	1.1195	KO_1Way up vs WT_12mo	-1.02515	1.28481	0.16286	Ndufb3	Ndufb3	NADH:ubiquinone oxidoreductase subunit B3	Ndufb3	66495	66495	1|1 C1.3	protein-coding	20.9121	20.8306	20.9935	+0.5σ	20.6527	21.027	20.7816	20.9493	20.7425	21.038	21.1216	20.8633	21.0664	20.878
1848	386	A0A0A6YVS2	Tmco1	5	5	17.8965	17.2487	0.0957314	1.56677	1.56677	KO_1Way up vs WT_12mo	-1.10455	2.7114	0.647792	Tmco1	Tmco1	transmembrane and coiled-coil domains 1	Tmco1	68944	68944	1|1 H2.3	protein-coding	17.5726	17.2487	17.8965	+2σ	17.6564	17.5759	17.1717	17.8695	15.97	18.0178	17.7668	18.0046	17.9048	17.7884
818	387	P19221	F2	5	5	20.95	20.8082	0.0957707	1.10325	1.10325	KO_1Way up vs WT_12mo	-1.02202	1.24396	0.141763	F2	F2	coagulation factor II	F2	14061	14061	2 E1|2 50.63 cM	protein-coding	20.8791	20.8082	20.95	+0.5σ	20.7314	20.8803	20.7909	20.9036	20.735	20.7294	21.0753	20.9407	21.0945	20.91
378	388	G3X9J1	Slc8a1	5	5	22.9539	22.8012	0.0964419	1.1117	1.1117	KO_1Way up vs WT_12mo	-1.02406	1.26562	0.152771	Slc8a1	Slc8a1	solute carrier family 8 (sodium/calcium exchanger), member 1	Slc8a1	20541	20541	17 E3|17 51.29 cM	protein-coding	22.8775	22.8012	22.9539	+0.5σ	22.7146	22.7208	22.8391	22.8845	22.847	22.99	23.0683	22.7048	23.1171	22.8896
154	389	P68369	Tuba1a	5	5	26.8614	26.8256	0.0965087	1.02517	1.02517	KO_1Way up vs WT_12mo	-1.00561	1.05686	0.0358629	Tuba1a	Tuba1a	tubulin, alpha 1A	Tuba1a	22142	22142	15 F1|15 55.29 cM	protein-coding	26.8435	26.8256	26.8614	+0.5σ	26.8309	26.7663	26.8566	26.8309	26.8431	26.8665	26.856	26.8303	26.8984	26.856
1113	390	Q9CZN7	Shmt2	5	5	19.8865	19.5887	0.0965329	1.2293	1.2293	KO_1Way up vs WT_12mo	-1.04754	1.58301	0.297834	Shmt2	Shmt2	serine hydroxymethyltransferase 2 (mitochondrial)	Shmt2	108037	108037	10|10 D3	protein-coding	19.7376	19.5887	19.8865	+1σ	19.375	19.6203	19.745	19.5136	19.6894	20.3273	19.8786	19.4848	20.0406	19.7013
524	391	Q9Z2Z6	Slc25a20	5	5	22.8396	23.0206	0.0967137	0.882122	-1.13363	KO_1Way down vs WT_12mo	-1.32203	1.02872	-0.180951	Slc25a20	Slc25a20	solute carrier family 25 (mitochondrial carnitine/acylcarnitine translocase), member 20	Slc25a20	57279	57279	9|9 F2	protein-coding	22.9301	22.8396	23.0206	-1σ	23.0444	22.965	22.8623	23.2465	22.9847	23.0591	22.822	22.8446	22.8669	22.6057
383	392	Q64518	Atp2a3	5	5	18.9037	18.2164	0.0968533	1.6102	1.6102	KO_1Way up vs WT_12mo	-1.11386	2.88797	0.687242	Atp2a3	Atp2a3	ATPase, Ca++ transporting, ubiquitous	Atp2a3	53313	53313	11|11 B4	protein-coding	18.5601	18.2164	18.9037	+2σ	18.3416	17.6495	18.9399	18.8311	17.3202	19.5699	18.8421	18.6425	18.8983	18.5656
24	393	Q61554	Fbn1	5	5	26.2673	26.4106	0.0971272	0.905459	-1.10441	KO_1Way down vs WT_12mo	-1.24761	1.02286	-0.143279	Fbn1	Fbn1	fibrillin 1	Fbn1	14118	14118	2 F1|2 61.38 cM	protein-coding	26.339	26.2673	26.4106	-0.5σ	26.4855	26.3827	26.2472	26.5366	26.4009	26.1314	26.3041	26.2932	26.4524	26.1553
1999	394	Q9D1R9	Rpl34	5	5	23.5598	23.7267	0.0976958	0.890771	-1.12262	KO_1Way down vs WT_12mo	-1.29427	1.02697	-0.166874	Rpl34	Rpl34	ribosomal protein L34	Rpl34	68436	68436	3|3 G3	protein-coding	23.6432	23.5598	23.7267	-0.5σ	23.8681	23.6495	23.7875	23.8456	23.4828	23.5336	23.6479	23.709	23.4214	23.4871
1524	395	Q9R0Q6	Arpc1a	5	5	19.9254	19.6859	0.0976983	1.18054	1.18054	KO_1Way up vs WT_12mo	-1.03892	1.44792	0.239448	Arpc1a	Arpc1a	actin related protein 2/3 complex, subunit 1A	Arpc1a	56443	56443	5|5 G2	protein-coding	19.8056	19.6859	19.9254	+1σ	19.7943	19.7279	19.6688	19.3295	19.9091	20.0644	19.9388	19.7329	19.7475	20.1432
1076	396	A2AUD5	Tpd52l2	5	5	20.217	20.3778	0.0982746	0.894494	-1.11795	KO_1Way down vs WT_12mo	-1.28265	1.02627	-0.160856	Tpd52l2	Tpd52l2	tumor protein D52-like 2	Tpd52l2	66314	66314	2|2 H4	protein-coding	20.2974	20.217	20.3778	-0.5σ	20.3638	20.6371	20.4626	20.2435	20.1821	20.2696	20.2017	20.2962	20.1384	20.179
1473	397	P48771	Cox7a2	5	5	19.8427	19.5655	0.0988025	1.21183	1.21183	KO_1Way up vs WT_12mo	-1.04616	1.53631	0.277184	Cox7a2	Cox7a2	cytochrome c oxidase subunit 7A2	Cox7a2	12866	12866	9 E1|9 43.82 cM	protein-coding	19.7041	19.5655	19.8427	+1σ	19.5431	19.6641	19.185	20.0206	19.4149	19.6658	19.8497	19.9988	19.8497	19.8497
1343	398	Q91VH6	Memo1	5	5	17.3764	16.9805	0.0990672	1.31579	1.31579	KO_1Way up vs WT_12mo	-1.06692	1.84716	0.395929	Memo1	Memo1	mediator of cell motility 1	Memo1	76890	76890	17|17 E2	protein-coding	17.1785	16.9805	17.3764	+2σ	16.9962	16.6167	17.4887	17.3202	16.4809	17.5609	17.2889	17.5685	17.1211	17.3428
1145	399	Q9DBD0	1300017J02Rik	5	5	19.3909	19.1272	0.099332	1.20051	1.20051	KO_1Way up vs WT_12mo	-1.0443	1.50506	0.263644	1300017J02Rik	1300017J02Rik	RIKEN cDNA 1300017J02 gene	1300017J02Rik	71775	71775	9|9 F1	protein-coding	19.259	19.1272	19.3909	+1σ	18.9157	19.1734	19.298	18.9594	19.2895	19.5329	19.6295	18.9606	19.3601	19.4712
1357	400	Q64442	Sord	5	5	18.5383	18.1342	0.0994436	1.32327	1.32327	KO_1Way up vs WT_12mo	-1.06884	1.87159	0.404108	Sord	Sord	sorbitol dehydrogenase	Sord	20322	20322	2 E5|2 60.59 cM	protein-coding	18.3362	18.1342	18.5383	+2σ	17.852	18.0486	18.2198	17.7485	18.8021	18.4354	18.7688	18.2157	18.4557	18.816
120	401	Q99JY0	Hadhb	5	5	27.4765	27.6023	0.099472	0.916503	-1.0911	KO_1Way down vs WT_12mo	-1.21545	1.02095	-0.125789	Hadhb	Hadhb	hydroxyacyl-CoA dehydrogenase trifunctional multienzyme complex subunit beta	Hadhb	231086	231086	5|5 B1	protein-coding	27.5394	27.4765	27.6023	-0.5σ	27.7032	27.4997	27.4228	27.7032	27.6825	27.594	27.44	27.4671	27.4846	27.3968
1244	402	Q7TSQ8	Pdpr	5	5	19.6504	19.4478	0.0997874	1.15074	1.15074	KO_1Way up vs WT_12mo	-1.03415	1.36941	0.202556	Pdpr	Pdpr	pyruvate dehydrogenase phosphatase regulatory subunit	Pdpr	319518	319518	8|8 E1	protein-coding	19.5491	19.4478	19.6504	+1σ	19.2692	19.4419	19.712	19.3025	19.5136	19.6964	19.5155	19.4961	19.9063	19.6378
675	403	Q9Z2X1	Hnrnpf	5	5	21.3851	21.7753	0.100904	0.763018	-1.31059	KO_1Way down vs WT_12mo	-1.83482	1.06822	-0.390211	Hnrnpf	Hnrnpf	heterogeneous nuclear ribonucleoprotein F	Hnrnpf	98758	98758	6|6 F1	protein-coding	21.5802	21.3851	21.7753	-2σ	22.3569	21.5004	21.6962	21.6813	21.6419	21.4146	20.9831	21.9012	21.2999	21.3268
1833	404	Q91Z31	Ptbp2	5	5	16.2874	15.8971	0.100976	1.31064	1.31064	KO_1Way up vs WT_12mo	-1.06833	1.83515	0.390272	Ptbp2	Ptbp2	polypyrimidine tract binding protein 2	Ptbp2	56195	56195	3|3 G1	protein-coding	16.0922	15.8971	16.2874	+2σ	15.7094	15.6836	15.9861	15.737	16.3695	16.6874	15.9396	16.6175	16.3039	15.8885
1847	405	Q6P3F7	Popdc2	5	5	18.835	18.474	0.101389	1.28436	1.28436	KO_1Way up vs WT_12mo	-1.06353	1.75437	0.361049	Popdc2	Popdc2	popeye domain containing 2	Popdc2	64082	64082	16|16 B3	protein-coding	18.6545	18.474	18.835	+1σ	18.6863	18.0964	18.7361	18.5399	18.3111	18.5271	19.3097	18.9214	18.9476	18.4692
617	406	Q9CQZ5	Ndufa6	5	5	24.3011	24.3896	0.101448	0.940464	-1.0633	KO_1Way down vs WT_12mo	-1.14784	1.01524	-0.0885553	Ndufa6	Ndufa6	NADH:ubiquinone oxidoreductase subunit A6	Ndufa6	67130	67130	15|15 E1	protein-coding	24.3453	24.3011	24.3896	-0.5σ	24.359	24.4841	24.3683	24.3777	24.359	24.3465	24.3573	24.3573	24.3044	24.1398
292	407	O54724	Cavin1	5	5	25.3067	25.3809	0.102691	0.949849	-1.0528	KO_1Way down vs WT_12mo	-1.12283	1.01304	-0.0742299	Cavin1	Cavin1	caveolae associated 1	Cavin1	19285	19285	11 D|11 63.95 cM	protein-coding	25.3438	25.3067	25.3809	-0.5σ	25.3915	25.4298	25.3799	25.2842	25.4191	25.3437	25.2013	25.2714	25.352	25.3649
1601	408	Q8C6B0	Mettl7a1	5	5	18.3233	17.9661	0.10336	1.28093	1.28093	KO_1Way up vs WT_12mo	-1.06507	1.74756	0.357195	Mettl7a1	Mettl7a1	methyltransferase like 7A1	Mettl7a1	70152	70152	15|15 F1	protein-coding	18.1447	17.9661	18.3233	+1σ	18.0036	17.9249	17.8695	18.1228	17.9098	17.7961	17.9526	18.7018	18.4788	18.6872
298	409	Q91Z53	Grhpr	5	5	23.0593	22.846	0.103365	1.15933	1.15933	KO_1Way up vs WT_12mo	-1.03836	1.3956	0.213289	Grhpr	Grhpr	glyoxylate reductase/hydroxypyruvate reductase	Grhpr	76238	76238	4|4 B1	protein-coding	22.9526	22.846	23.0593	+1σ	23.2155	22.8845	22.6688	22.6504	22.811	23.094	23.258	22.998	22.998	22.9486
1205	410	O35465	Fkbp8	5	5	18.618	18.4145	0.103793	1.15149	1.15149	KO_1Way up vs WT_12mo	-1.03684	1.37477	0.203497	Fkbp8	Fkbp8	FK506 binding protein 8	Fkbp8	14232	14232	8|8 B3.3	protein-coding	18.5162	18.4145	18.618	+1σ	18.3899	18.4741	18.4679	18.2858	18.4549	18.4072	18.7856	18.6259	18.9072	18.3642
1317	411	A0A1B0GSZ9	Mrpl23	5	5	18.4917	18.1079	0.104388	1.30481	1.30481	KO_1Way up vs WT_12mo	-1.07135	1.82402	0.383845	Mrpl23	Mrpl23	mitochondrial ribosomal protein L23	Mrpl23	19935	19935	7 F5|7 87.95 cM	protein-coding	18.2998	18.1079	18.4917	+2σ	18.5566	18.1918	17.5889	17.8278	18.3742	18.5813	18.179	18.7521	18.6693	18.2769
1543	412	Q9QUN9	Dkk3	5	5	18.7681	19.1564	0.105545	0.763986	-1.30892	KO_1Way down vs WT_12mo	-1.83948	1.07366	-0.388382	Dkk3	Dkk3	dickkopf WNT signaling pathway inhibitor 3	Dkk3	50781	50781	7|7 F1	protein-coding	18.9623	18.7681	19.1564	-2σ	19.185	18.7794	19.3636	19.6949	18.7594	18.4557	18.678	18.7194	18.816	19.1712
239	413	P26041	Msn	5	5	24.5657	24.4706	0.10565	1.06814	1.06814	KO_1Way up vs WT_12mo	-1.01759	1.16099	0.0951031	Msn	Msn	moesin	Msn	17698	17698	X|X C3	protein-coding	24.5181	24.4706	24.5657	+0.5σ	24.4729	24.359	24.4337	24.4337	24.6535	24.5246	24.5708	24.5323	24.5844	24.6163
1475	414	Q60973	Rbbp7	5	5	20.11	19.915	0.106051	1.14472	1.14472	KO_1Way up vs WT_12mo	-1.03663	1.3584	0.195001	Rbbp7	Rbbp7	retinoblastoma binding protein 7, chromatin remodeling factor	Rbbp7	245688	245688	X|X F4	protein-coding	20.0125	19.915	20.11	+1σ	19.8416	19.7824	20.0449	19.8349	20.071	20.0584	20.1103	20.4163	20.1041	19.8607
1300	415	B1ATI0	Aldh3a2	5	5	18.8993	18.6401	0.106875	1.19689	1.19689	KO_1Way up vs WT_12mo	-1.04966	1.50368	0.259286	Aldh3a2	Aldh3a2	aldehyde dehydrogenase family 3, subfamily A2	Aldh3a2	11671	11671	11 B2|11 37.96 cM	protein-coding	18.7697	18.6401	18.8993	+1σ	18.5679	19.1509	18.522	18.5169	18.4426	18.7688	19.0023	19.0191	18.9698	18.7368
217	416	E9QQ25	Speg	5	5	22.1718	22.2716	0.108109	0.93322	-1.07156	KO_1Way down vs WT_12mo	-1.17027	1.01919	-0.0997112	Speg	Speg	SPEG complex locus	Speg	11790	11790	1 C4|1 38.88 cM	protein-coding	22.2217	22.1718	22.2716	-0.5σ	22.2254	22.3105	22.146	22.3357	22.3402	22.0568	22.2022	22.2717	22.2287	22.0998
1020	417	Q5U458	Dnajc11	5	5	17.8423	18.0872	0.108861	0.843832	-1.18507	KO_1Way down vs WT_12mo	-1.47232	1.04837	-0.244973	Dnajc11	Dnajc11	DnaJ heat shock protein family (Hsp40) member C11	Dnajc11	230935	230935	4|4 E2	protein-coding	17.9647	17.8423	18.0872	-1σ	18.1918	18.1416	17.9039	18.0964	18.1024	17.5134	18.0972	17.5556	18.0404	18.0046
931	418	Q9JMH6	Txnrd1	5	5	20.4616	20.3288	0.108882	1.09647	1.09647	KO_1Way up vs WT_12mo	-1.02596	1.23345	0.132866	Txnrd1	Txnrd1	thioredoxin reductase 1	Txnrd1	50493	50493	10|10 C1	protein-coding	20.3952	20.3288	20.4616	+0.5σ	20.3479	20.2435	20.3567	20.1453	20.5506	20.4745	20.4042	20.5694	20.4234	20.4366
400	419	Q9WTI7	Myo1c	5	5	23.1504	22.9953	0.109438	1.11351	1.11351	KO_1Way up vs WT_12mo	-1.03063	1.2779	0.15512	Myo1c	Myo1c	myosin IC	Myo1c	17913	17913	11 B5|11 45.92 cM	protein-coding	23.0728	22.9953	23.1504	+0.5σ	22.9503	22.8761	23.0004	22.8391	23.3106	23.176	23.1272	23.0812	23.176	23.1917
446	420	P18242	Ctsd	5	5	23.4571	23.3816	0.109544	1.05375	1.05375	KO_1Way up vs WT_12mo	-1.01482	1.12685	0.0755325	Ctsd	Ctsd	cathepsin D	Ctsd	13033	13033	7|7 F5	protein-coding	23.4194	23.3816	23.4571	+0.5σ	23.3938	23.3312	23.3804	23.4338	23.3687	23.3232	23.5606	23.4814	23.4461	23.4742
895	421	P46412	Gpx3	5	5	23.8775	23.7686	0.110332	1.07845	1.07845	KO_1Way up vs WT_12mo	-1.02171	1.1883	0.108957	Gpx3	Gpx3	glutathione peroxidase 3	Gpx3	14778	14778	11|11 B1.3	protein-coding	23.823	23.7686	23.8775	+0.5σ	23.7646	23.6596	23.7569	23.806	23.8557	23.7961	23.7852	24.0698	23.855	23.8814
581	422	P23116	Eif3a	5	5	20.1279	19.9045	0.110466	1.16747	1.16747	KO_1Way up vs WT_12mo	-1.04512	1.42449	0.223389	Eif3a	Eif3a	eukaryotic translation initiation factor 3, subunit A	Eif3a	13669	13669	19|19 D3	protein-coding	20.0162	19.9045	20.1279	+1σ	20.0943	19.745	19.768	19.848	20.0673	19.8006	20.28	19.9891	20.3106	20.2591
1175	423	Q3TGU7	Pa2g4	5	5	20.7629	21.3616	0.110722	0.660357	-1.51433	KO_1Way down vs WT_12mo	-2.58226	1.12605	-0.598683	Pa2g4	Pa2g4	proliferation-associated 2G4	Pa2g4	18813	18813	10|10 D3	protein-coding	21.0622	20.7629	21.3616	-2σ	20.5056	20.9646	21.9255	21.5535	21.8588	20.3949	20.9511	21.3268	20.2753	20.8665
283	424	Q9Z2I0	Letm1	5	5	22.9405	23.0597	0.111388	0.920688	-1.08614	KO_1Way down vs WT_12mo	-1.20821	1.02416	-0.119216	Letm1	Letm1	leucine zipper-EF-hand containing transmembrane protein 1	Letm1	56384	56384	5|5 B2	protein-coding	23.0001	22.9405	23.0597	-0.5σ	22.8556	23.1146	23.0615	23.1178	23.1492	22.9828	22.9399	22.8669	23.0683	22.8446
203	425	O70433	Fhl2	5	5	25.0758	25.3714	0.111523	0.814744	-1.22738	KO_1Way down vs WT_12mo	-1.59851	1.0611	-0.295581	Fhl2	Fhl2	four and a half LIM domains 2	Fhl2	14200	14200	1|1 C1.1	protein-coding	25.2236	25.0758	25.3714	-1σ	25.0928	25.7134	25.4499	25.4499	25.1512	24.982	24.6637	25.1775	25.3785	25.1775
978	426	Q8C845	Efhd2	5	5	21.5018	21.719	0.112075	0.860199	-1.16252	KO_1Way down vs WT_12mo	-1.41217	1.04492	-0.217258	Efhd2	Efhd2	EF hand domain containing 2	Efhd2	27984	27984	4 D3|4 74.75 cM	protein-coding	21.6104	21.5018	21.719	-1σ	21.6053	21.9289	21.8152	21.5681	21.6777	21.1919	21.6075	21.3546	21.7638	21.5911
1118	427	Q9D6Y7	Msra	5	5	21.2753	21.3685	0.113865	0.937466	-1.06671	KO_1Way down vs WT_12mo	-1.16007	1.01952	-0.0931622	Msra	Msra	methionine sulfoxide reductase A	Msra	110265	110265	14 D1|14 33.36 cM	protein-coding	21.3219	21.2753	21.3685	-0.5σ	21.3019	21.3019	21.4477	21.3871	21.4039	21.218	21.3546	21.1849	21.4052	21.2139
79	428	Q9EQP2	Ehd4	5	5	26.5416	26.439	0.11514	1.07372	1.07372	KO_1Way up vs WT_12mo	-1.02191	1.17815	0.102624	Ehd4	Ehd4	EH-domain containing 4	Ehd4	98878	98878	2|2 E5	protein-coding	26.4903	26.439	26.5416	+0.5σ	26.3827	26.5366	26.556	26.2801	26.4395	26.4524	26.5701	26.5117	26.619	26.5548
1720	429	P62852	Rps25	5	5	21.649	21.8792	0.115733	0.852553	-1.17295	KO_1Way down vs WT_12mo	-1.44491	1.05023	-0.230138	Rps25	Rps25	ribosomal protein S25	Rps25	75617	75617	9|9 A5.2	protein-coding	21.7641	21.649	21.8792	-1σ	22.1682	21.7612	21.8111	22.0539	21.6014	21.676	21.9057	21.4024	21.6659	21.5951
1806	430	Q3TRE0	Sspn	5	5	19.4332	19.5532	0.116857	0.920201	-1.08672	KO_1Way down vs WT_12mo	-1.212	1.02628	-0.11998	Sspn	Sspn	sarcospan	Sspn	16651	16651	6 G3|6 77.7 cM	protein-coding	19.4932	19.4332	19.5532	-0.5σ	19.6417	19.7064	19.4697	19.5993	19.3487	19.4015	19.4433	19.3601	19.4848	19.4763
1005	431	A0A0R4J0J0	Palmd	5	5	21.7489	21.4088	0.117172	1.26587	1.26587	KO_1Way up vs WT_12mo	-1.07665	1.72526	0.34013	Palmd	Palmd	palmdelphin	Palmd	114301	114301	3 G1|3 50.49 cM	protein-coding	21.5788	21.4088	21.7489	+1σ	21.656	21.5435	21.1132	21.0975	21.6337	21.7673	21.9827	21.1964	22.0236	21.7744
112	432	O08553	Dpysl2	5	5	25.6386	25.5504	0.117966	1.0631	1.0631	KO_1Way up vs WT_12mo	-1.01956	1.15228	0.0882723	Dpysl2	Dpysl2	dihydropyrimidinase-like 2	Dpysl2	12934	12934	14 D1|14 34.6 cM	protein-coding	25.5945	25.5504	25.6386	+0.5σ	25.4769	25.4925	25.6152	25.5262	25.641	25.4987	25.6949	25.7117	25.6224	25.6655
100	433	P20152	Vim	5	5	28.5076	28.5883	0.118195	0.94557	-1.05756	KO_1Way down vs WT_12mo	-1.1385	1.01793	-0.0807442	Vim	Vim	vimentin	Vim	22352	22352	2 A1|2 10.04 cM	protein-coding	28.548	28.5076	28.5883	-0.5σ	28.6765	28.5229	28.586	28.6765	28.4798	28.5528	28.5222	28.4789	28.5528	28.4311
390	434	Q9QYB1	Clic4	5	5	22.8181	22.7186	0.119126	1.07136	1.07136	KO_1Way up vs WT_12mo	-1.0224	1.17352	0.0994387	Clic4	Clic4	chloride intracellular channel 4 (mitochondrial)	Clic4	29876	29876	4|4 D3	protein-coding	22.7684	22.7186	22.8181	+0.5σ	22.8173	22.6817	22.8301	22.7146	22.5494	22.8323	22.8947	22.7873	22.7437	22.8323
1555	435	E9QB02	Mars1	5	5	14.9129	15.4117	0.119809	0.707719	-1.41299	KO_1Way down vs WT_12mo	-2.23341	1.11864	-0.498751	Mars1	Mars1	methionine-tRNA synthetase 1	Mars1	216443	216443	10|10 D3	protein-coding	15.1623	14.9129	15.4117	-2σ	14.8458	15.7094	15.1257	16.1671	15.2103	14.2945	14.9606	15.0335	15.2766	14.9993
761	436	Q8BTY1	Kyat1	5	5	21.2227	21.0503	0.120619	1.12692	1.12692	KO_1Way up vs WT_12mo	-1.03993	1.32066	0.172387	Kyat1	Kyat1	kynurenine aminotransferase 1	Kyat1	70266	70266	2|2 B	protein-coding	21.1365	21.0503	21.2227	+0.5σ	20.9377	21.3243	20.9618	20.8221	21.2056	21.2272	21.2082	21.2323	21.3345	21.1112
482	437	P82198	Tgfbi	5	5	22.1694	21.9142	0.1222	1.19351	1.19351	KO_1Way up vs WT_12mo	-1.06092	1.51125	0.255214	Tgfbi	Tgfbi	transforming growth factor, beta induced	Tgfbi	21810	21810	13 B1|13 30.09 cM	protein-coding	22.0418	21.9142	22.1694	+1σ	21.5779	21.7313	22.2725	21.831	22.1583	21.9927	22.0312	22.2191	22.3601	22.244
538	438	Q8BVI4	Qdpr	5	5	21.9452	21.5789	0.122955	1.28901	1.28901	KO_1Way up vs WT_12mo	-1.08944	1.81016	0.366267	Qdpr	Qdpr	quinoid dihydropteridine reductase	Qdpr	110391	110391	5 B3|5 24.9 cM	protein-coding	21.762	21.5789	21.9452	+2σ	21.1705	22.1223	21.6855	21.2474	21.6687	22.3846	21.8709	21.9427	21.9167	21.6109
924	439	Q3B7Z2	Osbp	5	5	17.9765	18.3555	0.123916	0.768982	-1.30042	KO_1Way down vs WT_12mo	-1.84977	1.09383	-0.378979	Osbp	Osbp	oxysterol binding protein	Osbp	76303	76303	19 A|19 8.58 cM	protein-coding	18.166	17.9765	18.3555	-2σ	18.1335	18.3457	18.5806	17.7716	18.9462	17.8038	18.1097	18.1485	17.691	18.1297
83	440	P06745	Gpi1	5	5	27.4795	27.3986	0.125002	1.05772	1.05772	KO_1Way up vs WT_12mo	-1.0196	1.14069	0.080952	Gpi1	Gpi1	glucose-6-phosphate isomerase 1	Gpi1	14751	14751	7 B1|7 19.46 cM	protein-coding	27.4391	27.3986	27.4795	+0.5σ	27.4678	27.398	27.4997	27.2666	27.3607	27.4671	27.4846	27.44	27.44	27.566
1846	441	Q8C3W1	2310022B05Rik	5	5	20.2055	19.9111	0.125059	1.22638	1.22638	KO_1Way up vs WT_12mo	-1.07319	1.6141	0.29441	2310022B05Rik	2310022B05Rik	RIKEN cDNA 2310022B05 gene	2310022B05Rik	69551	69551	8|8 E2	protein-coding	20.0583	19.9111	20.2055	+1σ	20.249	19.6833	20.1134	19.6417	19.8678	20.4433	20.2591	20.0262	19.8243	20.4745
497	442	P26043	Rdx	5	5	21.4829	21.3918	0.125719	1.06519	1.06519	KO_1Way up vs WT_12mo	-1.02228	1.15992	0.0911174	Rdx	Rdx	radixin	Rdx	19684	19684	9|9 A5.3	protein-coding	21.4373	21.3918	21.4829	+0.5σ	21.3106	21.5134	21.2972	21.5134	21.3243	21.4496	21.486	21.4813	21.5514	21.4462
1874	443	Q9JHU9	Isyna1	5	5	16.9754	16.7839	0.125763	1.14191	1.14191	KO_1Way up vs WT_12mo	-1.04741	1.36579	0.191453	Isyna1	Isyna1	myo-inositol 1-phosphate synthase A1	Isyna1	71780	71780	8|8 B3.3	protein-coding	16.8797	16.7839	16.9754	+1σ	16.6435	16.5236	16.9787	16.8869	16.8869	16.9976	17.2274	16.8629	16.8092	16.9797
465	444	Q8CHS7	Dhrs7c	5	5	22.4031	22.2719	0.125792	1.09521	1.09521	KO_1Way up vs WT_12mo	-1.03227	1.23819	0.131208	Dhrs7c	Dhrs7c	dehydrogenase/reductase (SDR family) member 7C	Dhrs7c	68460	68460	11|11 B3	protein-coding	22.3375	22.2719	22.4031	+0.5σ	22.3486	22.1364	22.1638	22.375	22.3357	22.5477	22.4656	22.4706	22.2577	22.2738
1441	445	Q9ES83	Bves	5	5	19.2338	19.4829	0.126932	0.841407	-1.18849	KO_1Way down vs WT_12mo	-1.50151	1.06302	-0.249124	Bves	Bves	blood vessel epicardial substance	Bves	23828	23828	10 B2|10 23.47 cM	protein-coding	19.3584	19.2338	19.4829	-1σ	19.507	19.7353	19.4001	19.298	19.4739	19.4895	19.3501	18.7804	19.1426	19.4061
530	446	A0A0A0MQ68	Gcdh	5	5	22.4403	21.9862	0.127265	1.36998	1.36998	KO_1Way up vs WT_12mo	-1.11834	2.09896	0.454159	Gcdh	Gcdh	glutaryl-Coenzyme A dehydrogenase	Gcdh	270076	270076	8 C3|8 41.28 cM	protein-coding	22.2132	21.9862	22.4403	+2σ	21.9397	22.1735	21.8588	21.8528	22.1059	21.9738	22.6337	21.9167	22.3424	23.335
490	447	Q91YQ5	Rpn1	5	5	22.3013	22.8588	0.127717	0.67948	-1.47171	KO_1Way down vs WT_12mo	-2.48648	1.14799	-0.557497	Rpn1	Rpn1	ribophorin I	Rpn1	103963	103963	6 D1|6 39.13 cM	protein-coding	22.58	22.3013	22.8588	-2σ	22.3141	23.6036	22.2512	22.4234	23.7018	22.2543	22.2852	22.4593	22.2393	22.2684
884	448	Q9D7X8	Ggct	5	5	21.2816	21.2085	0.127752	1.05197	1.05197	KO_1Way up vs WT_12mo	-1.01827	1.12685	0.0730908	Ggct	Ggct	gamma-glutamyl cyclotransferase	Ggct	110175	110175	6 B3|6 27.26 cM	protein-coding	21.245	21.2085	21.2816	+0.5σ	21.3243	21.1561	21.1534	21.2553	21.1534	21.3214	21.1964	21.2921	21.3379	21.2601
115	449	E9Q800	Immt	5	5	26.4048	26.4489	0.1284	0.969882	-1.03105	KO_1Way down vs WT_12mo	-1.07484	1.01107	-0.0441195	Immt	Immt	inner membrane protein, mitochondrial	Immt	76614	76614	6|6 C1	protein-coding	26.4269	26.4048	26.4489	-0.5σ	26.4545	26.5134	26.4545	26.4395	26.3827	26.3995	26.3995	26.4524	26.3559	26.4166
1449	450	Q8BGN3	Enpp6	5	5	17.1126	16.8799	0.128475	1.17505	1.17505	KO_1Way up vs WT_12mo	-1.05984	1.46336	0.232718	Enpp6	Enpp6	ectonucleotide pyrophosphatase/phosphodiesterase 6	Enpp6	320981	320981	8 B1.1|8 26.48 cM	protein-coding	16.9962	16.8799	17.1126	+1σ	16.4969	16.8757	16.7658	17.0719	17.1892	17.1316	16.9976	17.3555	17.0651	17.0133
1021	451	P28843	Dpp4	5	5	19.4487	19.6991	0.128709	0.840709	-1.18947	KO_1Way down vs WT_12mo	-1.50636	1.06469	-0.250321	Dpp4	Dpp4	dipeptidylpeptidase 4	Dpp4	13482	13482	2 C1.3|2 35.85 cM	protein-coding	19.5739	19.4487	19.6991	-1σ	19.5136	19.6351	20.2064	19.5668	19.5735	19.6801	19.5268	19.3366	19.2609	19.4393
958	452	P47199	Cryz	5	5	19.9805	19.7791	0.129093	1.14981	1.14981	KO_1Way up vs WT_12mo	-1.05196	1.39076	0.201399	Cryz	Cryz	crystallin, zeta	Cryz	12972	12972	3|3 H4	protein-coding	19.8798	19.7791	19.9805	+1σ	19.848	19.7943	19.435	19.768	20.0501	20.0069	20.0644	20.1653	19.8112	19.8546
1390	453	Q8BJY1	Psmd5	5	5	18.3768	18.647	0.129517	0.829182	-1.20601	KO_1Way down vs WT_12mo	-1.55725	1.07068	-0.270239	Psmd5	Psmd5	proteasome (prosome, macropain) 26S subunit, non-ATPase, 5	Psmd5	66998	66998	2|2 B	protein-coding	18.5119	18.3768	18.647	-1σ	18.654	18.9119	18.3314	18.6417	18.6963	18.1599	18.0404	18.3349	18.6651	18.6837
265	454	Q99L13	Hibadh	5	5	24.0162	23.8615	0.130104	1.11318	1.11318	KO_1Way up vs WT_12mo	-1.04013	1.2889	0.154684	Hibadh	Hibadh	3-hydroxyisobutyrate dehydrogenase	Hibadh	58875	58875	6|6 B3	protein-coding	23.9388	23.8615	24.0162	+0.5σ	24.1014	23.7784	23.6495	23.7646	24.0138	23.9973	24.1495	23.9342	24.0203	23.9797
1457	455	Q8BY89	Slc44a2	5	5	19.0745	18.8822	0.130579	1.14259	1.14259	KO_1Way up vs WT_12mo	-1.05041	1.37133	0.192313	Slc44a2	Slc44a2	solute carrier family 44, member 2	Slc44a2	68682	68682	9|9 A3	protein-coding	18.9783	18.8822	19.0745	+1σ	18.755	18.5766	19.0014	18.9686	19.1092	19.0227	19.0515	18.884	19.1671	19.2472
1471	456	Q6ZWV7	Rpl35	5	5	21.5753	21.7177	0.131018	0.906004	-1.10375	KO_1Way down vs WT_12mo	-1.26367	1.03728	-0.142411	Rpl35	Rpl35	ribosomal protein L35	Rpl35	66489	66489	2|2 B	protein-coding	21.6465	21.5753	21.7177	-0.5σ	21.9482	21.6199	21.7455	21.7872	21.4877	21.5117	21.49	21.6721	21.5951	21.6075
88	457	P54071	Idh2	5	5	28.8656	28.7871	0.132826	1.05592	1.05592	KO_1Way up vs WT_12mo	-1.02079	1.13816	0.0785039	Idh2	Idh2	isocitrate dehydrogenase 2 (NADP+), mitochondrial	Idh2	269951	269951	7 D2|7 45.43 cM	protein-coding	28.8264	28.7871	28.8656	+0.5σ	28.7035	28.8829	28.8364	28.8364	28.6765	28.7955	28.8824	28.8824	28.8359	28.9319
63	458	Q61292	Lamb2	5	5	25.2824	25.3701	0.133362	0.94104	-1.06265	KO_1Way down vs WT_12mo	-1.15564	1.02339	-0.0876722	Lamb2	Lamb2	laminin, beta 2	Lamb2	16779	16779	9 F2|9 59.4 cM	protein-coding	25.3263	25.2824	25.3701	-0.5σ	25.3799	25.3443	25.311	25.3385	25.4769	25.1775	25.4174	25.2113	25.2623	25.3437
1731	459	E9QM99	Dock10	5	5	18.1857	18.656	0.134802	0.721795	-1.38543	KO_1Way down vs WT_12mo	-2.17705	1.13422	-0.470339	Dock10	Dock10	dedicator of cytokinesis 10	Dock10	210293	210293	1|1 C5	protein-coding	18.4209	18.1857	18.656	-2σ	19.0048	19.0636	17.7231	18.8021	18.6863	18.2157	18.3175	18.3266	18.4433	17.6251
616	460	Q3TML0	Pdia6	5	5	21.9682	21.8353	0.134981	1.09647	1.09647	KO_1Way up vs WT_12mo	-1.03629	1.24588	0.13287	Pdia6	Pdia6	protein disulfide isomerase associated 6	Pdia6	71853	71853	12|12 A1.1	protein-coding	21.9017	21.8353	21.9682	+0.5σ	21.846	21.7792	22.0438	21.846	21.6616	22.0236	22.0026	22.0998	21.9057	21.8093
805	461	P50171	H2-Ke6	5	5	22.5171	22.6455	0.135049	0.914798	-1.09314	KO_1Way down vs WT_12mo	-1.23688	1.03509	-0.128475	H2-Ke6	H2-Ke6	H2-K region expressed gene 6	H2-Ke6	14979	14979	17 B1|17 17.98 cM	protein-coding	22.5813	22.5171	22.6455	-0.5σ	22.6688	22.7802	22.5494	22.7976	22.4317	22.5777	22.4792	22.5477	22.4031	22.5777
215	462	O35459	Ech1	5	5	23.7176	23.8972	0.135189	0.882997	-1.13251	KO_1Way down vs WT_12mo	-1.346	1.04945	-0.179519	Ech1	Ech1	enoyl coenzyme A hydratase 1, peroxisomal	Ech1	51798	51798	7|7 B1	protein-coding	23.8074	23.7176	23.8972	-1σ	23.9238	23.7483	23.8135	24.0641	23.9361	23.8439	23.4506	23.8937	23.8663	23.5336
1064	463	P68433	H3c1	5	5	17.5396	16.7726	0.135214	1.70175	1.70175	KO_1Way up vs WT_12mo	-1.22911	3.55943	0.76702	H3c1	H3c1	H3 clustered histone 1	H3c1	360198	360198	13|13 A3.1	protein-coding	17.1561	16.7726	17.5396	+3σ	16.2568	16.5362	17.0961	17.342	16.6318	17.5766	16.0809	17.783	18.6809	17.5766
952	464	E9Q1G8	Septin7	5	5	20.6871	20.5414	0.13536	1.10622	1.10622	KO_1Way up vs WT_12mo	-1.04001	1.2727	0.145645	Septin7	Septin7	septin 7	Septin7	235072	235072	9|9 A4	protein-coding	20.6142	20.5414	20.6871	+0.5σ	20.746	20.37	20.5721	20.6119	20.4069	20.6136	20.7294	20.64	20.878	20.5742
53	465	P52480	Pkm	5	5	28.0295	27.956	0.135741	1.05225	1.05225	KO_1Way up vs WT_12mo	-1.02007	1.12944	0.0734715	Pkm	Pkm	pyruvate kinase, muscle	Pkm	18746	18746	9 B|9 32.03 cM	protein-coding	27.9928	27.956	28.0295	+0.5σ	27.9833	27.9392	27.8919	27.9112	28.0545	28.155	27.9551	28.0252	28.0061	28.0061
1256	466	Q9D7N9	Apmap	5	5	17.7824	18.0031	0.136182	0.858143	-1.16531	KO_1Way down vs WT_12mo	-1.44186	1.0618	-0.22071	Apmap	Apmap	adipocyte plasma membrane associated protein	Apmap	71881	71881	2|2 G3	protein-coding	17.8927	17.7824	18.0031	-1σ	17.9472	17.7231	17.8435	18.2758	18.2258	17.7374	17.6329	17.7239	17.7296	18.0881
664	467	O70622	Rtn2	5	5	22.9704	22.8727	0.136224	1.07006	1.07006	KO_1Way up vs WT_12mo	-1.02691	1.17583	0.0976863	Rtn2	Rtn2	reticulon 2 (Z-band associated protein)	Rtn2	20167	20167	7 A3|7 9.54 cM	protein-coding	22.9215	22.8727	22.9704	+0.5σ	22.8959	22.8687	22.7802	23.0151	22.8035	22.9542	23.0812	23.043	22.8446	22.9289
1862	468	Q3ULF4	Spg7	5	5	13.3756	13.878	0.136731	0.70596	-1.41651	KO_1Way down vs WT_12mo	-2.30173	1.14713	-0.502342	Spg7	Spg7	SPG7, paraplegin matrix AAA peptidase subunit	Spg7	234847	234847	8|8 E1	protein-coding	13.6268	13.3756	13.878	-2σ	14.2941	14.2131	13.6563	13.3639	13.8625	12.9277	12.9277	13.3641	14.2945	13.3641
307	469	P20108	Prdx3	5	5	25.301	25.164	0.137047	1.09957	1.09957	KO_1Way up vs WT_12mo	-1.03826	1.25531	0.136939	Prdx3	Prdx3	peroxiredoxin 3	Prdx3	11757	11757	19 D3|19 56.52 cM	protein-coding	25.2325	25.164	25.301	+0.5σ	24.9374	25.1913	25.2024	25.2257	25.2634	25.3224	25.2826	25.4987	25.1297	25.2714
432	470	Q9DCM2	Gstk1	5	5	23.6426	23.5415	0.137335	1.07256	1.07256	KO_1Way up vs WT_12mo	-1.02818	1.18279	0.101054	Gstk1	Gstk1	glutathione S-transferase kappa 1	Gstk1	76263	76263	6|6 B2.1	protein-coding	23.5921	23.5415	23.6426	+0.5σ	23.5287	23.655	23.6036	23.519	23.4013	23.4961	23.709	23.7187	23.589	23.7
962	471	Q91VK1	Bzw2	5	5	19.0067	19.2275	0.137548	0.85812	-1.16534	KO_1Way down vs WT_12mo	-1.44319	1.06272	-0.220748	Bzw2	Bzw2	basic leucine zipper and W2 domains 2	Bzw2	66912	66912	12|12 A3	protein-coding	19.1171	19.0067	19.2275	-1σ	19.2333	19.2747	19.1458	19.12	19.3636	19.4116	18.9986	18.8368	19.1172	18.6693
848	472	Q9D880	Timm50	5	5	20.5546	20.6687	0.137645	0.923951	-1.08231	KO_1Way down vs WT_12mo	-1.20885	1.03198	-0.114112	Timm50	Timm50	translocase of inner mitochondrial membrane 50	Timm50	66525	66525	7|7 A3	protein-coding	20.6117	20.5546	20.6687	-0.5σ	20.7496	20.6254	20.5469	20.8678	20.554	20.5308	20.6506	20.5742	20.4572	20.5602
1625	473	Q6PG95	Cramp1	5	5	16.5411	16.1069	0.138236	1.35112	1.35112	KO_1Way up vs WT_12mo	-1.12805	2.05926	0.434151	Cramp1	Cramp1	cramped chromatin regulator 1	Cramp1	57354	57354	17|17 A3.3	protein-coding	16.324	16.1069	16.5411	+2σ	16.2226	15.6021	16.1805	16.4146	16.1147	16.6325	16.6874	15.6576	16.825	16.9028
837	474	Q8R1S0	Coq6	5	5	21.0816	20.9736	0.138373	1.07769	1.07769	KO_1Way up vs WT_12mo	-1.03045	1.19679	0.107946	Coq6	Coq6	coenzyme Q6 monooxygenase	Coq6	217707	217707	12|12 D1	protein-coding	21.0276	20.9736	21.0816	+0.5σ	20.7952	21.1036	20.916	20.916	21.1374	21.0753	21.0945	21.1161	21.0329	21.0891
8	475	O55143	Atp2a2	5	5	30.8512	30.9299	0.138511	0.946906	-1.05607	KO_1Way down vs WT_12mo	-1.13999	1.02215	-0.0787076	Atp2a2	Atp2a2	ATPase, Ca++ transporting, cardiac muscle, slow twitch 2	Atp2a2	11938	11938	5 62.38 cM|5 F	protein-coding	30.8906	30.8512	30.9299	-0.5σ	31.047	31.047	30.8517	30.8517	30.8517	30.8512	30.8512	30.8512	30.8512	30.8512
1133	476	Q8R0H9	Gga1	5	5	15.9324	15.6918	0.138699	1.18151	1.18151	KO_1Way up vs WT_12mo	-1.0694	1.49285	0.240633	Gga1	Gga1	golgi associated, gamma adaptin ear containing, ARF binding protein 1	Gga1	106039	106039	15|15 E1	protein-coding	15.8121	15.6918	15.9324	+1σ	15.827	15.8695	15.2413	15.5351	15.9861	15.9865	16.0243	15.9865	15.71	15.9547
1828	477	Q4VAE3	Tmem65	5	5	19.0593	19.2948	0.138861	0.849437	-1.17725	KO_1Way down vs WT_12mo	-1.48011	1.06796	-0.235421	Tmem65	Tmem65	transmembrane protein 65	Tmem65	74868	74868	15|15 D1	protein-coding	19.1771	19.0593	19.2948	-1σ	19.246	19.4935	19.2747	19.1349	19.3247	18.646	18.9272	19.3413	19.3308	19.0515
388	478	Q8C129	Lnpep	5	5	22.372	22.4663	0.139061	0.936681	-1.0676	KO_1Way down vs WT_12mo	-1.17027	1.02676	-0.0943703	Lnpep	Lnpep	leucyl/cystinyl aminopeptidase	Lnpep	240028	240028	17|17 A3.2	protein-coding	22.4191	22.372	22.4663	-0.5σ	22.5924	22.57	22.4489	22.3202	22.4	22.4031	22.4524	22.3664	22.3291	22.3087
118	479	Q9EQ20	Aldh6a1	5	5	25.1718	25.2631	0.139277	0.938686	-1.06532	KO_1Way down vs WT_12mo	-1.16434	1.02593	-0.0912854	Aldh6a1	Aldh6a1	aldehyde dehydrogenase family 6, subfamily A1	Aldh6a1	104776	104776	12 D1|12 39.21 cM	protein-coding	25.2174	25.1718	25.2631	-0.5σ	25.4191	25.2985	25.1913	25.1686	25.2381	25.224	25.224	25.117	25.0701	25.224
1684	480	O35685	Nudc	5	5	18.484	18.6208	0.139547	0.909512	-1.09949	KO_1Way down vs WT_12mo	-1.25631	1.03923	-0.136835	Nudc	Nudc	nudC nuclear distribution protein	Nudc	18221	18221	4|4 D2.3	protein-coding	18.5524	18.484	18.6208	-0.5σ	18.7731	18.5074	18.5074	18.565	18.7513	18.6554	18.3266	18.3906	18.5688	18.4788
1492	481	Q9CWU6	Uqcc1	5	5	18.2273	17.9886	0.140241	1.17992	1.17992	KO_1Way up vs WT_12mo	-1.06993	1.48958	0.238691	Uqcc1	Uqcc1	ubiquinol-cytochrome c reductase complex assembly factor 1	Uqcc1	56046	56046	2|2 H1	protein-coding	18.1079	17.9886	18.2273	+1σ	18.3165	17.8028	17.9349	17.7658	18.1228	18.0563	18.1882	18.2607	18.6029	18.0282
2016	482	E9Q5A2	BC107364	5	5	18.2474	18.6431	0.14034	0.760146	-1.31554	KO_1Way down vs WT_12mo	-1.93605	1.11869	-0.395651	BC107364	BC107364	cDNA sequence BC107364	BC107364	329716	329716	3|3 F2.1	protein-coding	18.4453	18.2474	18.6431	-2σ	18.9462	19.0048	18.7268	18.8144	17.7231	18.1238	18.2607	18.3642	18.1132	18.3752
60	483	P17182	Eno1	5	5	26.2921	26.2292	0.140583	1.04458	1.04458	KO_1Way up vs WT_12mo	-1.01804	1.11082	0.0629162	Eno1	Eno1	enolase 1, alpha non-neuron	Eno1	13806	13806	4 E2|4 81.24 cM	protein-coding	26.2606	26.2292	26.2921	+0.5σ	26.3046	26.1683	26.213	26.213	26.2472	26.2462	26.3428	26.2787	26.2115	26.3815
1791	484	Q08376	Zbtb14	5	5	19.9944	19.7434	0.140812	1.19007	1.19007	KO_1Way up vs WT_12mo	-1.07412	1.52123	0.251042	Zbtb14	Zbtb14	zinc finger and BTB domain containing 14	Zbtb14	22666	22666	17 E1.3|17 40.42 cM	protein-coding	19.8689	19.7434	19.9944	+1σ	19.4881	19.5467	20.062	19.6042	20.016	19.8846	20.0858	19.8736	20.3171	19.8112
508	485	A0A0R4J038	Kng1	5	5	23.2576	23.1737	0.140846	1.05987	1.05987	KO_1Way up vs WT_12mo	-1.02419	1.15049	0.0838839	Kng1	Kng1	kininogen 1	Kng1	16644	16644	16|16 B1	protein-coding	23.2157	23.1737	23.2576	+0.5σ	23.2084	23.0496	23.1933	23.2311	23.1861	23.1917	23.1562	23.2446	23.3232	23.3723
1057	486	Q9ERF3	Wdr61	5	5	17.7686	17.4609	0.140852	1.23781	1.23781	KO_1Way up vs WT_12mo	-1.09166	1.67262	0.307792	Wdr61	Wdr61	WD repeat domain 61	Wdr61	66317	66317	9|9 A5.3	protein-coding	17.6148	17.4609	17.7686	+1σ	17.4524	17.2983	17.2204	17.7335	17.5997	17.2889	18.1178	17.4723	17.9977	17.9666
17	487	Q99KI0	Aco2	5	5	29.9246	29.9984	0.140925	0.950122	-1.0525	KO_1Way down vs WT_12mo	-1.13131	1.02127	-0.0738149	Aco2	Aco2	aconitase 2, mitochondrial	Aco2	11429	11429	15|15 E1	protein-coding	29.9615	29.9246	29.9984	-0.5σ	29.9984	29.9984	29.9984	29.9984	29.9984	29.9964	29.8495	29.9964	29.7842	29.9964
1108	488	Q8C996	Tmem163	5	5	19.1654	19.3521	0.141662	0.878623	-1.13814	KO_1Way down vs WT_12mo	-1.36672	1.05508	-0.186683	Tmem163	Tmem163	transmembrane protein 163	Tmem163	72160	72160	1|1 E3	protein-coding	19.2587	19.1654	19.3521	-1σ	19.298	19.5735	19.5308	19.0834	19.2747	19.1671	19.3262	18.9037	19.1945	19.2354
725	489	E9Q3E2	Synpo	5	5	20.3952	20.602	0.141929	0.86641	-1.15419	KO_1Way down vs WT_12mo	-1.41393	1.06139	-0.206878	Synpo	Synpo	synaptopodin	Synpo	104027	104027	18|18 D3- E1	protein-coding	20.4986	20.3952	20.602	-1σ	20.459	20.5634	20.4305	20.735	20.8221	20.5417	20.1536	20.6136	20.5203	20.1466
54	490	P26039	Tln1	5	5	24.5089	24.4184	0.142018	1.06469	1.06469	KO_1Way up vs WT_12mo	-1.02641	1.16349	0.0904308	Tln1	Tln1	talin 1	Tln1	21894	21894	4|4 A5	protein-coding	24.4637	24.4184	24.5089	+0.5σ	24.4604	24.4061	24.4841	24.3484	24.3931	24.4138	24.6163	24.4709	24.4043	24.639
391	491	P14602	Hspb1	5	5	24.8902	24.7147	0.142291	1.12939	1.12939	KO_1Way up vs WT_12mo	-1.05204	1.3419	0.175541	Hspb1	Hspb1	heat shock protein 1	Hspb1	15507	15507	5 G2|5 75.51 cM	protein-coding	24.8025	24.7147	24.8902	+0.5σ	24.7693	25.0137	24.7973	24.4507	24.5425	24.7959	25.0284	24.8198	24.9242	24.8829
1214	492	Q64514	Tpp2	5	5	21.7781	21.7297	0.142496	1.03412	1.03412	KO_1Way up vs WT_12mo	-1.01412	1.08451	0.0484084	Tpp2	Tpp2	tripeptidyl peptidase II	Tpp2	22019	22019	1 C1.1|1 23.5 cM	protein-coding	21.7539	21.7297	21.7781	+0.5σ	21.6962	21.8071	21.6889	21.7504	21.7061	21.7708	21.8224	21.7127	21.8175	21.7673
627	493	Q923D2	Blvrb	5	5	21.6168	21.4069	0.143788	1.15665	1.15665	KO_1Way up vs WT_12mo	-1.0635	1.42278	0.209947	Blvrb	Blvrb	biliverdin reductase B (flavin reductase (NADPH))	Blvrb	233016	233016	7|7 A3	protein-coding	21.5118	21.4069	21.6168	+1σ	21.6136	21.4677	21.1649	21.2682	21.5199	21.7359	21.7527	21.5514	21.2539	21.7902
1609	494	A0A0R4J0Q4	Loxl1	5	5	17.9159	18.2334	0.144488	0.802425	-1.24622	KO_1Way down vs WT_12mo	-1.7057	1.09828	-0.317561	Loxl1	Loxl1	lysyl oxidase-like 1	Loxl1	16949	16949	9 B|9 31.65 cM	protein-coding	18.0746	17.9159	18.2334	-1σ	18.637	18.1087	18.2064	18.1024	18.1126	17.5946	17.526	18.0404	17.9666	18.4515
946	495	P08121	Col3a1	5	5	21.8816	22.011	0.145203	0.914161	-1.0939	KO_1Way down vs WT_12mo	-1.24356	1.03923	-0.12948	Col3a1	Col3a1	collagen, type III, alpha 1	Col3a1	12825	12825	1 C1.1|1 23.67 cM	protein-coding	21.9463	21.8816	22.011	-0.5σ	21.9137	21.831	22.0941	22.2457	21.9707	21.7902	21.8285	21.9243	21.9827	21.882
881	496	A0A140LIU4	Cox7a1	5	5	24.3554	24.4835	0.145533	0.915021	-1.09287	KO_1Way down vs WT_12mo	-1.24087	1.03894	-0.128123	Cox7a1	Cox7a1	cytochrome c oxidase subunit 7A1	Cox7a1	12865	12865	7 B1|7 17.31 cM	protein-coding	24.4195	24.3554	24.4835	-0.5σ	24.721	24.5333	24.4507	24.4061	24.3066	24.2359	24.3142	24.4201	24.4495	24.3573
1350	497	Q8R3X6	Gpc6	5	5	18.3172	18.5971	0.146547	0.823623	-1.21415	KO_1Way down vs WT_12mo	-1.60376	1.08792	-0.279944	Gpc6	Gpc6	glypican 6	Gpc6	23888	23888	14|14 E4	protein-coding	18.4571	18.3172	18.5971	-1σ	18.7325	18.6905	18.5264	18.4469	18.5894	18.0687	17.8151	18.7455	18.5133	18.4433
1002	498	P01644	Ce9	5	5	21.2962	20.7019	0.146698	1.5098	1.5098	KO_1Way up vs WT_12mo	-1.19621	2.72677	0.594359	Ce9	Ce9	immunoglobulin light chain variable region	-	56304	56304	6|6 C1	other	20.9991	20.7019	21.2962	+2σ	21.3049	19.9539	21.1942	20.4402	20.6161	22.109	21.2653	21.5703	20.452	21.0846
86	499	Q7TMM9	Tubb2a	5	5	22.5922	22.4203	0.14759	1.12652	1.12652	KO_1Way up vs WT_12mo	-1.05363	1.3371	0.17187	Tubb2a	Tubb2a	tubulin, beta 2A class IIA	Tubb2a	22151	22151	13 A3.3|13 14.03 cM	protein-coding	22.5063	22.4203	22.5922	+0.5σ	22.5053	22.0974	22.6157	22.3862	22.497	22.5831	22.5528	22.8013	22.5981	22.4257
1216	500	A0A075B5Y4	Ighv1-81	5	5	21.2542	21.5973	0.147642	0.788366	-1.26845	KO_1Way down vs WT_12mo	-1.78587	1.10996	-0.343062	Ighv1-81	Ighv1-81	immunoglobulin heavy variable 1-81	Ighv1-81	668591	668591	12|12 F2	other	21.4258	21.2542	21.5973	-1σ	21.3871	21.5485	21.6739	22.1296	21.2474	21.6942	21.2785	20.7443	21.2397	21.3147
542	501	Q91XH5	Spr	5	5	22.4685	22.3044	0.147648	1.12049	1.12049	KO_1Way up vs WT_12mo	-1.05118	1.31976	0.16413	Spr	Spr	sepiapterin reductase	Spr	20751	20751	6 C3|6 37.15 cM	protein-coding	22.3864	22.3044	22.4685	+0.5σ	22.2207	22.4397	22.4	22.1844	22.2772	22.1244	22.5333	22.5777	22.6282	22.4792
1894	502	P37889	Fbln2	5	5	17.6577	17.4111	0.147788	1.18646	1.18646	KO_1Way up vs WT_12mo	-1.078	1.5175	0.246668	Fbln2	Fbln2	fibulin 2	Fbln2	14115	14115	6 D1|6 40.42 cM	protein-coding	17.5344	17.4111	17.6577	+1σ	17.1548	17.3344	17.3111	17.6392	17.6159	18.0113	17.4105	17.3609	17.8082	17.6979
1558	503	Q91VC9	Ghitm	5	5	20.0775	20.3549	0.148449	0.82509	-1.21199	KO_1Way down vs WT_12mo	-1.5992	1.08869	-0.277377	Ghitm	Ghitm	growth hormone inducible transmembrane protein	Ghitm	66092	66092	14 B|14 21.29 cM	protein-coding	20.2162	20.0775	20.3549	-1σ	20.735	20.3638	19.9365	20.3754	20.3638	20.3821	20.1704	20.0119	19.6658	20.1573
653	504	Q811U4	Mfn1	5	5	21.1663	21.2616	0.148627	0.936096	-1.06827	KO_1Way down vs WT_12mo	-1.17505	1.02967	-0.0952709	Mfn1	Mfn1	mitofusin 1	Mfn1	67414	67414	3 A3|3 15.75 cM	protein-coding	21.214	21.1663	21.2616	-0.5σ	21.2359	21.3328	21.1374	21.3761	21.2256	21.1216	21.2569	21.2653	21.044	21.1436
1897	505	B1ASU9	Tlk2	5	5	20.4899	20.2739	0.14903	1.1615	1.1615	KO_1Way up vs WT_12mo	-1.06879	1.44187	0.215984	Tlk2	Tlk2	tousled-like kinase 2 (Arabidopsis)	Tlk2	24086	24086	11|11 E1	protein-coding	20.3819	20.2739	20.4899	+1σ	19.8903	20.5506	20.249	20.2396	20.4402	20.4323	20.3381	20.5554	20.7514	20.3724
894	506	Q8BGQ7	Aars	5	5	18.4863	18.3364	0.150004	1.10948	1.10948	KO_1Way up vs WT_12mo	-1.04768	1.28962	0.149879	Aars	Aars	alanyl-tRNA synthetase	Aars	234734	234734	8|8 E1	protein-coding	18.4113	18.3364	18.4863	+0.5σ	18.236	18.3314	18.2017	18.5338	18.3792	18.4433	18.7603	18.3531	18.5034	18.3713
468	507	Q9JLV1	Bag3	5	5	24.8915	25.0392	0.150974	0.902708	-1.10778	KO_1Way down vs WT_12mo	-1.28532	1.04738	-0.147669	Bag3	Bag3	BCL2-associated athanogene 3	Bag3	29810	29810	7|7 F3	protein-coding	24.9654	24.8915	25.0392	-0.5σ	24.8959	24.9374	25.1185	25.1512	25.0928	24.6637	24.9122	24.8659	25.1498	24.8659
521	508	Q9DBG5	Plin3	5	5	20.9492	20.8198	0.151093	1.09383	1.09383	KO_1Way up vs WT_12mo	-1.04144	1.24605	0.129391	Plin3	Plin3	perilipin 3	Plin3	66905	66905	17|17 D	protein-coding	20.8845	20.8198	20.9492	+0.5σ	20.9812	20.758	20.7276	20.9678	20.6643	20.9632	20.8324	21.029	20.8424	21.0788
719	509	F6VW30	Ywhaq	5	5	21.0573	20.7434	0.152549	1.2431	1.2431	KO_1Way up vs WT_12mo	-1.10495	1.70747	0.313939	Ywhaq	Ywhaq	tyrosine 3-monooxygenase/tryptophan 5-monooxygenase activation protein theta	Ywhaq	22630	22630	12|12 A1.3	protein-coding	20.9003	20.7434	21.0573	+1σ	20.1596	20.5889	20.9078	21.2972	20.7632	21.0945	21.0544	21.0252	20.8471	21.2653
772	510	Q71RI9	Kyat3	5	5	21.1066	20.9648	0.152877	1.1033	1.1033	KO_1Way up vs WT_12mo	-1.04625	1.27356	0.141819	Kyat3	Kyat3	kynurenine aminotransferase 3	Kyat3	229905	229905	3|3 H1	protein-coding	21.0357	20.9648	21.1066	+0.5σ	20.8171	21.2227	20.9582	20.8612	20.9646	21.0622	21.3214	21.0103	21.1009	21.038
320	511	P10630	Eif4a2	5	5	21.4289	21.5724	0.154573	0.905357	-1.10454	KO_1Way down vs WT_12mo	-1.27796	1.04751	-0.143441	Eif4a2	Eif4a2	eukaryotic translation initiation factor 4A2	Eif4a2	13682	13682	16 B1|16 13.93 cM	protein-coding	21.5007	21.4289	21.5724	-0.5σ	21.5652	21.846	21.6813	21.4365	21.3328	21.4536	21.4662	21.4212	21.4146	21.3889
99	512	Q9JHU4	Dync1h1	5	5	24.0393	23.9952	0.157027	1.03101	1.03101	KO_1Way up vs WT_12mo	-1.01467	1.07858	0.0440611	Dync1h1	Dync1h1	dynein cytoplasmic 1 heavy chain 1	Dync1h1	13424	13424	12 F1|12 60.7 cM	protein-coding	24.0173	23.9952	24.0393	+0.5σ	24.006	24.0292	23.9988	23.9361	24.006	24.0557	23.952	24.0359	24.063	24.0899
1495	513	A2AFQ0	Huwe1	5	5	15.2155	15.5528	0.157683	0.791512	-1.2634	KO_1Way down vs WT_12mo	-1.78553	1.11862	-0.337316	Huwe1	Huwe1	HECT, UBA and WWE domain containing 1	Huwe1	59026	59026	X|X F3	protein-coding	15.3841	15.2155	15.5528	-1σ	15.3033	15.4091	15.5733	16.0391	15.4393	15.1263	15.6842	15.079	14.6889	15.4991
132	514	Q1XH17	Trim72	5	5	25.2948	25.1733	0.1577	1.08782	1.08782	KO_1Way up vs WT_12mo	-1.04119	1.23208	0.121435	Trim72	Trim72	tripartite motif-containing 72	Trim72	434246	434246	7|7 F3	protein-coding	25.234	25.1733	25.2948	+0.5σ	25.2024	25.2634	25.1686	25.0715	25.1608	25.3903	25.3903	25.2623	25.4026	25.0284
68	515	Q60932	Vdac1	5	5	28.3479	28.4359	0.157744	0.940802	-1.06292	KO_1Way down vs WT_12mo	-1.16336	1.0297	-0.088037	Vdac1	Vdac1	voltage-dependent anion channel 1	Vdac1	22333	22333	11 B1.3|11 31.86 cM	protein-coding	28.3919	28.3479	28.4359	-0.5σ	28.3371	28.4798	28.5532	28.432	28.3775	28.3992	28.2485	28.2762	28.4789	28.3365
1712	516	Q9D881	Cox5b-ps	5	5	22.3672	22.5447	0.158328	0.884211	-1.13095	KO_1Way down vs WT_12mo	-1.35722	1.06111	-0.177538	Cox5b-ps	Cox5b-ps	cytochrome c oxidase subunit 5B, pseudogene	Cox5b-ps	100040340	100040340	13|13 A3.1	pseudo	22.456	22.3672	22.5447	-1σ	22.2725	22.7666	22.6763	22.7264	22.2817	22.39	22.2738	22.3807	22.3389	22.4524
1396	517	Q60631	Grb2	5	5	18.3113	18.4461	0.159047	0.910837	-1.09789	KO_1Way down vs WT_12mo	-1.26121	1.04633	-0.134736	Grb2	Grb2	growth factor receptor bound protein 2	Grb2	14784	14784	11 E2|11 80.91 cM	protein-coding	18.3787	18.3113	18.4461	-0.5σ	18.598	18.4066	18.37	18.654	18.2017	18.384	18.2117	18.3424	18.3319	18.2866
11	518	P16546	Sptan1	5	5	20.439	20.2611	0.159423	1.13126	1.13126	KO_1Way up vs WT_12mo	-1.06184	1.35889	0.177933	Sptan1	Sptan1	spectrin alpha, non-erythrocytic 1	Sptan1	20740	20740	2 B|2 20.93 cM	protein-coding	20.35	20.2611	20.439	+0.5σ	20.4485	20.1951	20.01	20.2668	20.3848	20.3522	20.7366	20.2635	20.3273	20.5154
720	519	Q8BGZ7	Krt75	5	5	17.6113	17.8937	0.160683	0.822225	-1.21621	KO_1Way down vs WT_12mo	-1.62857	1.101	-0.282396	Krt75	Krt75	keratin 75	Krt75	109052	109052	15 F2|15 56.91 cM	protein-coding	17.7525	17.6113	17.8937	-1σ	17.729	17.9966	18.0917	18.3165	17.3344	17.6619	17.683	17.5478	17.7884	17.3753
427	520	Q99PT1	Arhgdia	5	5	24.0318	23.9333	0.16086	1.07063	1.07063	KO_1Way up vs WT_12mo	-1.03417	1.18542	0.0984627	Arhgdia	Arhgdia	Rho GDP dissociation inhibitor (GDI) alpha	Arhgdia	192662	192662	11|11 E2	protein-coding	23.9825	23.9333	24.0318	+0.5σ	23.8456	23.9675	23.9361	23.8681	24.0491	23.9714	24.0899	23.9664	23.9222	24.2089
210	521	Q7TMG8	Nipsnap2	5	5	25.8103	25.8884	0.161989	0.947252	-1.05569	KO_1Way down vs WT_12mo	-1.14489	1.02729	-0.07818	Nipsnap2	Nipsnap2	nipsnap homolog 2	Nipsnap2	14467	14467	5|5 G1.3	protein-coding	25.8494	25.8103	25.8884	-0.5σ	25.7573	25.9628	25.8568	25.9952	25.8701	25.8418	25.729	25.8556	25.8689	25.7559
1585	522	Q9D1J3	Sarnp	5	5	20.691	20.8233	0.162474	0.912374	-1.09604	KO_1Way down vs WT_12mo	-1.25754	1.04681	-0.132303	Sarnp	Sarnp	SAP domain containing ribonucleoprotein	Sarnp	66118	66118	10|10 D3	protein-coding	20.7571	20.691	20.8233	-0.5σ	20.9907	20.806	20.7425	20.8803	20.697	20.8825	20.606	20.5119	20.64	20.8145
638	523	P62830	Rpl23	5	5	23.9616	23.8076	0.162666	1.11268	1.11268	KO_1Way up vs WT_12mo	-1.05479	1.3059	0.154043	Rpl23	Rpl23	ribosomal protein L23	Rpl23	65019	65019	11 D|11 61.1 cM	protein-coding	23.8846	23.8076	23.9616	+0.5σ	23.655	24.1337	23.8602	23.6407	23.7483	23.8354	23.9797	23.9222	24.0996	23.9714
121	524	A0A0R4J083	Acadl	5	5	28.2403	28.315	0.162772	0.949529	-1.05315	KO_1Way down vs WT_12mo	-1.13823	1.02623	-0.0747168	Acadl	Acadl	acyl-Coenzyme A dehydrogenase, long-chain	Acadl	11363	11363	1 C3|1 33.64 cM	protein-coding	28.2777	28.2403	28.315	-0.5σ	28.3064	28.3775	28.3064	28.3997	28.185	28.2762	28.155	28.3365	28.2265	28.207
1225	525	Q91WG5	Prkag2	5	5	20.7467	20.6066	0.163118	1.10197	1.10197	KO_1Way up vs WT_12mo	-1.04989	1.27494	0.140091	Prkag2	Prkag2	protein kinase, AMP-activated, gamma 2 non-catalytic subunit	Prkag2	108099	108099	5|5 A3	protein-coding	20.6766	20.6066	20.7467	+0.5σ	20.6254	20.7232	20.5928	20.3338	20.758	20.7801	20.8692	20.7556	20.5522	20.7766
912	526	Q3UGR5	Hdhd2	5	5	21.6126	21.331	0.163585	1.21555	1.21555	KO_1Way up vs WT_12mo	-1.10323	1.63011	0.281614	Hdhd2	Hdhd2	haloacid dehalogenase-like hydrolase domain containing 2	Hdhd2	76987	76987	18|18 E3	protein-coding	21.4718	21.331	21.6126	+1σ	21.0351	21.6053	21.7399	21.0233	21.2515	21.6075	21.2397	21.5976	21.9243	21.6942
175	527	E9Q6A6	Col6a6	5	5	23.7174	23.6004	0.166213	1.08452	1.08452	KO_1Way up vs WT_12mo	-1.04258	1.22627	0.117059	Col6a6	Col6a6	collagen, type VI, alpha 6	Col6a6	245026	245026	9|9 F1	protein-coding	23.6589	23.6004	23.7174	+0.5σ	23.5414	23.4338	23.655	23.7569	23.6146	23.6541	23.6646	23.6541	23.6801	23.9342
66	528	P99024	Tubb5	5	5	23.1406	22.9956	0.167074	1.10573	1.10573	KO_1Way up vs WT_12mo	-1.05338	1.2879	0.144997	Tubb5	Tubb5	tubulin, beta 5 class I	Tubb5	22154	22154	17|17 B1	protein-coding	23.0681	22.9956	23.1406	+0.5σ	22.7504	23.0257	22.8959	23.1398	23.1663	23.2358	23.1171	23.1079	22.9635	23.2789
466	529	A0A075B5P2	Igkc	5	5	20.8788	21.2065	0.167123	0.796839	-1.25496	KO_1Way down vs WT_12mo	-1.77137	1.12474	-0.32764	Igkc	Igkc	immunoglobulin kappa constant	Igkc	16071	16071	6 C1|6 32.04 cM	other	21.0426	20.8788	21.2065	-1σ	21.0233	21.3635	21.2515	21.588	20.806	20.5485	21.4462	20.9137	20.5254	20.9604
1352	530	Q80WJ7	Mtdh	5	5	15.392	15.1445	0.167203	1.18718	1.18718	KO_1Way up vs WT_12mo	-1.09293	1.54037	0.247536	Mtdh	Mtdh	metadherin	Mtdh	67154	67154	15 B3.1|15 13.98 cM	protein-coding	15.2683	15.1445	15.392	+1σ	14.9989	15.2103	15.3337	14.8458	15.3337	15.2418	15.4707	15.6027	15.6842	14.9606
619	531	Q8BVQ9	Psmc2	5	5	23.2899	23.2329	0.167898	1.04031	1.04031	KO_1Way up vs WT_12mo	-1.02079	1.10474	0.0570084	Psmc2	Psmc2	proteasome (prosome, macropain) 26S subunit, ATPase 2	Psmc2	19181	19181	5 A3|5 9.97 cM	protein-coding	23.2614	23.2329	23.2899	+0.5σ	23.1299	23.2597	23.2018	23.2372	23.3361	23.2973	23.335	23.2358	23.2789	23.3026
1997	532	A0A0U1RNF2	Lcmt1	5	5	17.2074	17.6439	0.167984	0.738928	-1.35331	KO_1Way down vs WT_12mo	-2.1442	1.17077	-0.436495	Lcmt1	Lcmt1	leucine carboxyl methyltransferase 1	Lcmt1	30949	30949	7|7 F3	protein-coding	17.4257	17.2074	17.6439	-2σ	17.8695	17.5676	18.1416	16.9118	17.729	17.532	17.8201	16.7386	16.9797	16.9667
318	533	P62259	Ywhae	5	5	24.6055	24.4819	0.168613	1.08945	1.08945	KO_1Way up vs WT_12mo	-1.04588	1.24137	0.123604	Ywhae	Ywhae	tyrosine 3-monooxygenase/tryptophan 5-monooxygenase activation protein, epsilon polypeptide	Ywhae	22627	22627	11 B5|11 45.92 cM	protein-coding	24.5437	24.4819	24.6055	+0.5σ	24.3066	24.3269	24.6195	24.6961	24.4604	24.5125	24.596	24.639	24.6163	24.6637
365	534	P63101	Ywhaz	5	5	24.5626	24.4814	0.168677	1.05791	1.05791	KO_1Way up vs WT_12mo	-1.02993	1.15268	0.0812227	Ywhaz	Ywhaz	tyrosine 3-monooxygenase/tryptophan 5-monooxygenase activation protein, zeta polypeptide	Ywhaz	22631	22631	15|15 B3.1	protein-coding	24.522	24.4814	24.5626	+0.5σ	24.5863	24.3683	24.3931	24.5594	24.4996	24.6744	24.5323	24.5246	24.4971	24.5844
404	535	Q9R069	Bcam	5	5	23.2751	23.3399	0.169298	0.956037	-1.04598	KO_1Way down vs WT_12mo	-1.12029	1.02395	-0.0648617	Bcam	Bcam	basal cell adhesion molecule	Bcam	57278	57278	7|7 A3	protein-coding	23.3075	23.2751	23.3399	-0.5σ	23.4606	23.325	23.2727	23.3687	23.2727	23.2208	23.3089	23.229	23.3518	23.2648
1276	536	G3UY93	Vars	5	5	18.0092	18.1364	0.169492	0.915624	-1.09215	KO_1Way down vs WT_12mo	-1.24953	1.04757	-0.127173	Vars	Vars	valyl-tRNA synthetase	Vars	22321	22321	17 B1|17 18.54 cM	protein-coding	18.0728	18.0092	18.1364	-0.5σ	18.2482	18.1228	18.1474	17.8576	18.3058	17.9198	18.0451	18.1178	17.9847	17.9786
612	537	Q8BMK4	Ckap4	5	5	21.8696	21.5727	0.170052	1.22847	1.22847	KO_1Way up vs WT_12mo	-1.1151	1.68285	0.296866	Ckap4	Ckap4	cytoskeleton-associated protein 4	Ckap4	216197	216197	10|10 C1	protein-coding	21.7212	21.5727	21.8696	+1σ	21.7097	21.9184	21.5725	21.1496	21.5134	22.4524	21.7585	21.7045	21.8348	21.5976
1879	538	Q9R0U9	Tex21	5	5	18.4461	18.6646	0.170643	0.859425	-1.16357	KO_1Way down vs WT_12mo	-1.46749	1.0839	-0.218556	Tex21	Tex21	testis expressed gene 21	Tex21	80384	80384	12|12 C3	protein-coding	18.5554	18.4461	18.6646	-1σ	18.621	18.4149	18.3416	18.8257	19.12	18.4105	18.4305	18.4398	18.5656	18.384
1789	539	O08992	Sdcbp	5	5	16.7708	16.5013	0.170991	1.20538	1.20538	KO_1Way up vs WT_12mo	-1.10474	1.60511	0.269486	Sdcbp	Sdcbp	syndecan binding protein	Sdcbp	53378	53378	4|4 A1	protein-coding	16.6361	16.5013	16.7708	+1σ	16.2037	16.9526	16.7231	16.0549	16.5721	16.9124	16.6325	16.5888	16.9237	16.7965
767	540	E9Q6R7	Utrn	5	5	18.0805	17.8935	0.171023	1.13843	1.13843	KO_1Way up vs WT_12mo	-1.0716	1.38883	0.187051	Utrn	Utrn	utrophin	Utrn	22288	22288	10 A1|10 3.77 cM	protein-coding	17.987	17.8935	18.0805	+1σ	18.0721	18.0331	17.6495	17.9301	17.7824	18.2117	18.2983	18.1925	17.8242	17.8758
1589	541	Q9CWE0	Mtfr1l	5	5	16.6504	17.0324	0.171843	0.767372	-1.30315	KO_1Way down vs WT_12mo	-1.95751	1.1527	-0.382002	Mtfr1l	Mtfr1l	mitochondrial fission regulator 1-like	Mtfr1l	76824	76824	4|4 D3	protein-coding	16.8414	16.6504	17.0324	-2σ	17.0554	17.3111	16.6318	16.9366	17.2269	16.3518	16.7749	16.9375	15.9547	17.2329
1185	542	P01898	H2-Q10	5	5	18.031	18.4612	0.172979	0.742193	-1.34736	KO_1Way down vs WT_12mo	-2.1333	1.17513	-0.430133	H2-Q10	H2-Q10	histocompatibility 2, Q region locus 10	H2-Q10	15007	15007	17 B1|17 18.68 cM	protein-coding	18.2461	18.031	18.4612	-2σ	18.6641	18.7442	17.9519	18.0681	18.8775	18.7103	17.5478	17.9977	17.6068	18.2925
822	543	Q9DCC5	Cbx3	5	5	18.2976	18.5014	0.172994	0.868238	-1.15176	KO_1Way down vs WT_12mo	-1.43199	1.07949	-0.203838	Cbx3	Cbx3	chromobox 3	Cbx3	12417	12417	6 B3|6 24.89 cM	protein-coding	18.3995	18.2976	18.5014	-1σ	18.0787	18.459	18.755	18.5894	18.6249	18.4162	18.3871	18.3494	18.0178	18.3175
528	544	Q9D020	Nt5c3	5	5	24.0864	23.998	0.173302	1.06319	1.06319	KO_1Way up vs WT_12mo	-1.0338	1.16858	0.0883979	Nt5c3	Nt5c3	5'-nucleotidase, cytosolic III	Nt5c3	107569	107569	6|6 B3	protein-coding	24.0422	23.998	24.0864	+0.5σ	23.8602	24.1411	24.0217	24.006	23.9611	24.0123	24.2266	24.0468	24.0468	24.0996
1336	545	Q9D0I9	Rars	5	5	18.8072	18.5834	0.173754	1.16779	1.16779	KO_1Way up vs WT_12mo	-1.08811	1.4839	0.223783	Rars	Rars	arginyl-tRNA synthetase	Rars	104458	104458	11|11 A4	protein-coding	18.6953	18.5834	18.8072	+1σ	18.4819	18.7049	18.4634	18.7594	18.5074	18.6977	19.254	18.8033	18.4105	18.8703
1670	546	Q9DCC8	Tomm20	5	5	18.8524	19.0259	0.17392	0.886728	-1.12774	KO_1Way down vs WT_12mo	-1.35793	1.06772	-0.173437	Tomm20	Tomm20	translocase of outer mitochondrial membrane 20	Tomm20	67952	67952	8|8 E2	protein-coding	18.9392	18.8524	19.0259	-1σ	18.7487	19.0393	19.2234	19.0745	19.0434	18.6809	19.012	18.6029	18.9832	18.9832
252	547	P61922	Abat	5	5	23.8702	23.7983	0.174659	1.05105	1.05105	KO_1Way up vs WT_12mo	-1.02767	1.13528	0.0718367	Abat	Abat	4-aminobutyrate aminotransferase	Abat	268860	268860	16|16 A1	protein-coding	23.8343	23.7983	23.8702	+0.5σ	23.7307	23.8371	23.9238	23.7018	23.7982	23.8751	23.9277	23.769	23.9126	23.8663
449	548	Q99L43	Cds2	5	5	22.0034	21.8544	0.174684	1.10875	1.10875	KO_1Way up vs WT_12mo	-1.05822	1.30091	0.148937	Cds2	Cds2	CDP-diacylglycerol synthase (phosphatidate cytidylyltransferase) 2	Cds2	110911	110911	2 F2|2 64.15 cM	protein-coding	21.9289	21.8544	22.0034	+0.5σ	21.8588	21.8982	21.6419	21.8193	22.0539	21.9243	22.0527	22.1666	21.7527	22.1205
1925	549	Q8VDC0	Lars2	5	5	18.4832	18.0815	0.175192	1.32106	1.32106	KO_1Way up vs WT_12mo	-1.16556	2.03415	0.4017	Lars2	Lars2	leucyl-tRNA synthetase, mitochondrial	Lars2	102436	102436	9 F4|9 73.92 cM	protein-coding	18.2824	18.0815	18.4832	+2σ	18.2064	17.9586	18.1168	18.3833	17.7424	17.5556	19.0405	18.6076	18.6497	18.5625
291	550	P24527	Lta4h	5	5	24.9927	24.908	0.175388	1.06044	1.06044	KO_1Way up vs WT_12mo	-1.03286	1.16149	0.0846638	Lta4h	Lta4h	leukotriene A4 hydrolase	Lta4h	16993	16993	10|10 C2	protein-coding	24.9504	24.908	24.9927	+0.5σ	24.9688	24.9688	24.8959	24.7693	24.9374	25.1042	25.0116	24.9044	24.8829	25.0603
594	551	P80317	Cct6a	5	5	21.3948	21.2804	0.175725	1.08255	1.08255	KO_1Way up vs WT_12mo	-1.04479	1.22439	0.114429	Cct6a	Cct6a	chaperonin containing Tcp1, subunit 6a (zeta)	Cct6a	12466	12466	5|5 G1.3	protein-coding	21.3376	21.2804	21.3948	+0.5σ	21.1374	21.352	21.2751	21.4782	21.1592	21.272	21.5314	21.4087	21.4308	21.3311
1277	552	P0C0S6	H2az1	5	5	27.8467	27.9501	0.176106	0.93086	-1.07428	KO_1Way down vs WT_12mo	-1.20079	1.04048	-0.103364	H2az1	H2az1	H2A.Z variant histone 1	H2az1	51788	51788	3|3 G3	protein-coding	27.8984	27.8467	27.9501	-0.5σ	28.0545	27.8428	27.8428	28.0545	27.9559	27.842	27.7655	27.8693	27.7317	28.0252
1033	553	Q9CXS4	Cenpv	5	5	20.0082	19.8537	0.177011	1.11302	1.11302	KO_1Way up vs WT_12mo	-1.06152	1.31504	0.154484	Cenpv	Cenpv	centromere protein V	Cenpv	73139	73139	11|11 B2	protein-coding	19.9309	19.8537	20.0082	+0.5σ	19.7064	19.5431	20.0242	19.9938	20.0009	20.0534	20.0262	19.9786	19.8786	20.1041
1078	554	P70271	Pdlim4	5	5	18.7261	18.9722	0.177305	0.843172	-1.186	KO_1Way down vs WT_12mo	-1.54726	1.10001	-0.246101	Pdlim4	Pdlim4	PDZ and LIM domain 4	Pdlim4	30794	30794	11 B1.3|11 32.13 cM	protein-coding	18.8492	18.7261	18.9722	-1σ	19.2638	18.9399	18.7442	19.2404	18.6729	18.5034	18.5271	18.7405	19.1317	18.728
797	555	Q08879	Fbln1	5	5	19.331	19.5636	0.178288	0.851081	-1.17498	KO_1Way down vs WT_12mo	-1.51171	1.09499	-0.232632	Fbln1	Fbln1	fibulin 1	Fbln1	14114	14114	15|15 E2	protein-coding	19.4473	19.331	19.5636	-1σ	19.712	19.2597	19.8092	19.6273	19.4098	19.4667	18.9515	19.6756	19.2154	19.3457
1258	556	Q7TMK9	Syncrip	5	5	22.315	22.4012	0.178295	0.941996	-1.06158	KO_1Way down vs WT_12mo	-1.16548	1.0342	-0.0862068	Syncrip	Syncrip	synaptotagmin binding, cytoplasmic RNA interacting protein	Syncrip	56403	56403	9|9 E3.1	protein-coding	22.3581	22.315	22.4012	-0.5σ	22.3262	22.5231	22.4893	22.2555	22.4117	22.2632	22.2717	22.4067	22.37	22.2632
328	557	Q9EQH3	Vps35	5	5	22.8159	22.7474	0.181255	1.04861	1.04861	KO_1Way up vs WT_12mo	-1.02766	1.12999	0.0684772	Vps35	Vps35	VPS35 retromer complex component	Vps35	65114	65114	8 C3|8 41.61 cM	protein-coding	22.7816	22.7474	22.8159	+0.5σ	22.7666	22.6157	22.7208	22.8761	22.7579	22.772	22.8323	22.8737	22.7644	22.8371
1282	558	Q62446	Fkbp3	5	5	23.8161	23.7196	0.182137	1.06921	1.06921	KO_1Way up vs WT_12mo	-1.03946	1.18833	0.0965505	Fkbp3	Fkbp3	FK506 binding protein 3	Fkbp3	30795	30795	12|12 C1	protein-coding	23.7678	23.7196	23.8161	+0.5σ	23.7483	23.8265	23.7784	23.5774	23.6672	23.9222	23.9342	23.7286	23.691	23.8046
146	559	E9Q450	Tpm1	5	5	26.348	26.3072	0.183454	1.02873	1.02873	KO_1Way up vs WT_12mo	-1.01667	1.07591	0.0408579	Tpm1	Tpm1	tropomyosin 1, alpha	Tpm1	22003	22003	9 C|9 36.27 cM	protein-coding	26.3276	26.3072	26.348	+0.5σ	26.2472	26.3281	26.3567	26.2472	26.3567	26.3815	26.3559	26.3428	26.3041	26.3559
657	560	E9QMK9	Dglucy	5	5	21.5826	21.755	0.183891	0.887322	-1.12699	KO_1Way down vs WT_12mo	-1.36217	1.07249	-0.172471	Dglucy	Dglucy	D-glutamate cyclase	Dglucy	217830	217830	12|12 E	protein-coding	21.6688	21.5826	21.755	-1σ	21.72	21.7097	21.8884	21.9137	21.5435	21.2999	21.5078	21.5157	21.8663	21.7231
1247	561	Q8C0M9	Asrgl1	5	5	21.8655	21.9537	0.184179	0.940708	-1.06303	KO_1Way down vs WT_12mo	-1.17128	1.0365	-0.0881813	Asrgl1	Asrgl1	asparaginase like 1	Asrgl1	66514	66514	19|19 A	protein-coding	21.9096	21.8655	21.9537	-0.5σ	21.8841	21.9397	21.9076	22.1638	21.8731	21.7948	21.9319	21.8285	21.9319	21.8403
1491	562	Q8BTX9	Hsdl1	5	5	18.6699	18.081	0.184283	1.50404	1.50404	KO_1Way up vs WT_12mo	-1.27073	2.87458	0.588843	Hsdl1	Hsdl1	hydroxysteroid dehydrogenase like 1	Hsdl1	72552	72552	8|8 E1	protein-coding	18.3755	18.081	18.6699	+2σ	17.1087	19.2333	17.9249	17.9966	18.1416	19.0983	18.3801	18.5476	18.0728	19.2505
392	563	Q9QYR9	Acot2	5	5	24.1112	24.1857	0.184513	0.949699	-1.05296	KO_1Way down vs WT_12mo	-1.14289	1.03081	-0.0744573	Acot2	Acot2	acyl-CoA thioesterase 2	Acot2	171210	171210	12|12 D1	protein-coding	24.1485	24.1112	24.1857	-0.5σ	24.1337	24.2491	24.1411	24.1411	24.2633	24.1605	24.0804	24.1325	24.2163	23.9664
1237	564	Q61160	Fadd	5	5	19.2998	18.8716	0.185438	1.34558	1.34558	KO_1Way up vs WT_12mo	-1.192	2.1582	0.428225	Fadd	Fadd	Fas (TNFRSF6)-associated via death domain	Fadd	14082	14082	7 F5|7 88.85 cM	protein-coding	19.0857	18.8716	19.2998	+2σ	19.3082	19.1244	17.729	19.0719	19.1244	19.2609	19.2423	19.1211	19.5036	19.371
140	565	Q9R0Y5	Ak1	5	5	27.1159	27.0469	0.187294	1.049	1.049	KO_1Way up vs WT_12mo	-1.02908	1.1324	0.0690135	Ak1	Ak1	adenylate kinase 1	Ak1	11636	11636	2 B|2 22.09 cM	protein-coding	27.0814	27.0469	27.1159	+0.5σ	26.9582	27.1358	27.0903	27.0251	27.0251	27.1343	27.1343	26.9773	27.1994	27.1343
1906	566	Q9CWK8	Snx2	5	5	17.7391	17.5713	0.187508	1.12333	1.12333	KO_1Way up vs WT_12mo	-1.07228	1.35307	0.167777	Snx2	Snx2	sorting nexin 2	Snx2	67804	67804	18|18 D1	protein-coding	17.6552	17.5713	17.7391	+0.5σ	17.3816	17.729	17.6743	17.3816	17.6903	17.7046	17.8359	17.71	17.4604	17.9847
1908	567	Q8C156	Ncaph	5	5	17.6961	17.9096	0.187853	0.862419	-1.15953	KO_1Way down vs WT_12mo	-1.4697	1.09311	-0.213539	Ncaph	Ncaph	non-SMC condensin I complex, subunit H	Ncaph	215387	215387	2|2 F1	protein-coding	17.8028	17.6961	17.9096	-1σ	17.5467	17.8893	17.8472	18.0225	18.2425	17.6751	17.6683	17.5198	18.0563	17.5609
2030	568	Q62422	Ostf1	5	5	16.7242	17.039	0.188102	0.803975	-1.24382	KO_1Way down vs WT_12mo	-1.76444	1.14049	-0.314778	Ostf1	Ostf1	osteoclast stimulating factor 1	Ostf1	20409	20409	19 B|19 13.17 cM	protein-coding	16.8816	16.7242	17.039	-1σ	16.6777	17.4452	16.7956	16.8242	17.4524	16.5888	16.5241	16.4154	17.1554	16.9375
1230	569	P26516	Psmd7	5	5	19.2559	18.8975	0.188446	1.28198	1.28198	KO_1Way up vs WT_12mo	-1.16185	1.90948	0.358378	Psmd7	Psmd7	proteasome (prosome, macropain) 26S subunit, non-ATPase, 7	Psmd7	17463	17463	8 D3|8 54.38 cM	protein-coding	19.0767	18.8975	19.2559	+1σ	18.7184	19.5595	19.12	18.5679	18.522	19.6006	19.2763	19.5878	18.884	18.931
130	570	Q99LC5	Etfa	5	5	27.9301	27.8733	0.188902	1.04016	1.04016	KO_1Way up vs WT_12mo	-1.02414	1.10806	0.0568091	Etfa	Etfa	electron transferring flavoprotein, alpha polypeptide	Etfa	110842	110842	9|9 B	protein-coding	27.9017	27.8733	27.9301	+0.5σ	27.7665	27.9559	27.8701	27.9559	27.8182	27.9383	27.9106	27.9551	27.9551	27.8914
801	571	P35235	Ptpn11	5	5	21.7969	21.8947	0.188976	0.934467	-1.07013	KO_1Way down vs WT_12mo	-1.1932	1.04193	-0.0977847	Ptpn11	Ptpn11	protein tyrosine phosphatase, non-receptor type 11	Ptpn11	19247	19247	5|5 F	protein-coding	21.8458	21.7969	21.8947	-0.5σ	21.8193	21.9255	21.9993	21.8982	21.831	21.6313	21.9785	21.7082	21.8439	21.8224
1525	572	Q9QZ57	Hspb3	5	5	18.9128	18.6717	0.19272	1.18186	1.18186	KO_1Way up vs WT_12mo	-1.10938	1.54957	0.241056	Hspb3	Hspb3	heat shock protein 3	Hspb3	56534	56534	13|13 D2.2	protein-coding	18.7922	18.6717	18.9128	+1σ	18.9199	18.9921	18.3954	18.3742	18.6771	18.7231	18.9698	19.2119	19.0563	18.6029
1052	573	Q3ULJ0	Gpd1l	5	5	19.4755	19.3483	0.192789	1.09211	1.09211	KO_1Way up vs WT_12mo	-1.05629	1.25985	0.127121	Gpd1l	Gpd1l	glycerol-3-phosphate dehydrogenase 1-like	Gpd1l	333433	333433	9 F3|9 65.47 cM	protein-coding	19.4119	19.3483	19.4755	+0.5σ	19.2851	19.3295	19.3882	19.4596	19.2793	19.1774	19.4327	19.5813	19.6531	19.5329
1489	574	A0A1B0GR11	Taldo1	5	5	22.3361	22.548	0.192828	0.863428	-1.15817	KO_1Way down vs WT_12mo	-1.46959	1.09559	-0.211853	Taldo1	Taldo1	transaldolase 1	Taldo1	21351	21351	7|7 F5	protein-coding	22.442	22.3361	22.548	-1σ	22.9016	22.5353	22.2408	22.6871	22.375	22.2022	22.3087	22.5075	22.0791	22.5831
551	575	C0HKE6	H2ac13	5	5	26.4205	26.2716	0.193259	1.10876	1.10876	KO_1Way up vs WT_12mo	-1.06648	1.31108	0.148947	H2ac13	H2ac13	H2A clustered histone 13	H2ac13	319191	319191	13|13 A3.1	protein-coding	26.3461	26.2716	26.4205	+0.5σ	26.2009	26.0867	26.3134	26.2009	26.556	26.4166	26.5351	26.1814	26.3995	26.5701
1685	576	Q9DCU6	Mrpl4	5	5	18.3813	18.1396	0.196025	1.18235	1.18235	KO_1Way up vs WT_12mo	-1.11217	1.55475	0.241651	Mrpl4	Mrpl4	mitochondrial ribosomal protein L4	Mrpl4	66163	66163	9|9 A3	protein-coding	18.2604	18.1396	18.3813	+1σ	17.6743	18.3487	18.4972	18.0444	18.1335	18.2494	18.2664	18.6318	18.5988	18.1599
1147	577	P47963	Rpl13	5	5	22.7522	22.8554	0.196346	0.930946	-1.07418	KO_1Way down vs WT_12mo	-1.20758	1.04656	-0.10323	Rpl13	Rpl13	ribosomal protein L13	Rpl13	270106	270106	8|8 E1	protein-coding	22.8038	22.7522	22.8554	-0.5σ	22.9426	23.0151	22.7579	22.8556	22.7059	22.6855	22.6222	22.8823	22.8155	22.7556
838	578	E9PZS8	Cox7a2l	5	5	21.5948	20.8817	0.196646	1.63939	1.63939	KO_1Way up vs WT_12mo	-1.37026	3.68268	0.713156	Cox7a2l	Cox7a2l	cytochrome c oxidase subunit 7A2 like	Cox7a2l	20463	20463	17|17 E4	protein-coding	21.2383	20.8817	21.5948	+2σ	20.4672	20.5721	20.3338	20.4347	22.6004	21.7179	21.7231	22.1149	20.5742	21.8439
590	579	Q8K3J1	Ndufs8	5	5	22.4554	22.3321	0.197384	1.08923	1.08923	KO_1Way up vs WT_12mo	-1.05624	1.25315	0.123306	Ndufs8	Ndufs8	NADH:ubiquinone oxidoreductase core subunit S8	Ndufs8	225887	225887	19|19 A	protein-coding	22.3938	22.3321	22.4554	+0.5σ	22.1111	22.2365	22.375	22.5849	22.3529	22.4836	22.3424	22.5687	22.4792	22.4031
556	580	F8WHL2	Copa	5	5	21.7256	21.864	0.198022	0.908478	-1.10074	KO_1Way down vs WT_12mo	-1.28875	1.06365	-0.138476	Copa	Copa	coatomer protein complex subunit alpha	Copa	12847	12847	1 H3|1 79.54 cM	protein-coding	21.7948	21.7256	21.864	-0.5σ	22.0804	21.6242	21.8245	21.8884	21.9027	21.7231	21.8139	21.5622	21.6075	21.9211
279	581	O35129	Phb2	5	5	24.1478	24.2004	0.198257	0.964205	-1.03712	KO_1Way down vs WT_12mo	-1.10117	1.02374	-0.0525886	Phb2	Phb2	prohibitin 2	Phb2	12034	12034	6 F2|6 59.17 cM	protein-coding	24.1741	24.1478	24.2004	-0.5σ	24.2937	24.2375	24.0822	24.1861	24.2024	24.2007	24.1325	24.1237	24.1325	24.1495
167	582	J3QQ13	Tnnt2	5	5	28.6588	28.6352	0.198889	1.01648	1.01648	KO_1Way up vs WT_12mo	-1.01062	1.04421	0.0235822	Tnnt2	Tnnt2	troponin T2, cardiac	Tnnt2	21956	21956	1 E4|1 59.32 cM	protein-coding	28.647	28.6352	28.6588	+0.5σ	28.6475	28.6475	28.6475	28.586	28.6475	28.6471	28.6187	28.6761	28.6761	28.6761
1172	583	P27612	Plaa	5	5	18.0909	17.8441	0.198999	1.18659	1.18659	KO_1Way up vs WT_12mo	-1.11702	1.57277	0.246827	Plaa	Plaa	phospholipase A2, activating protein	Plaa	18786	18786	4 C5|4 43.34 cM	protein-coding	17.9675	17.8441	18.0909	+1σ	17.7876	18.2597	17.6613	17.717	17.795	18.1755	17.7884	18.4105	17.7339	18.3464
202	584	E9QN70	Lamb1	5	5	22.944	23.0191	0.199126	0.949297	-1.05341	KO_1Way down vs WT_12mo	-1.14769	1.03426	-0.0750689	Lamb1	Lamb1	laminin B1	Lamb1	16777	16777	12 A2|12 13.39 cM	protein-coding	22.9815	22.944	23.0191	-0.5σ	22.8911	23.0615	22.9321	23.1492	23.0615	22.8737	22.9635	22.906	22.9542	23.0226
693	585	Q01405	Sec23a	5	5	20.6629	20.3234	0.200542	1.26529	1.26529	KO_1Way up vs WT_12mo	-1.16612	1.8669	0.339467	Sec23a	Sec23a	SEC23 homolog A, COPII coat complex component	Sec23a	20334	20334	12|12 C1	protein-coding	20.4931	20.3234	20.6629	+1σ	21.1329	20.136	19.7725	20.062	20.5139	20.8424	20.4996	20.6181	20.5661	20.7883
1250	586	Q99KK7	Dpp3	5	5	16.2495	15.8683	0.200901	1.30242	1.30242	KO_1Way up vs WT_12mo	-1.18881	2.01659	0.381198	Dpp3	Dpp3	dipeptidylpeptidase 3	Dpp3	75221	75221	19|19 A	protein-coding	16.0589	15.8683	16.2495	+2σ	16.2888	15.3767	15.9389	16.0803	15.657	16.0988	17.1096	16.0809	15.8276	16.1307
42	587	Q8CI94	Pygb	5	5	26.9115	26.8264	0.201893	1.06078	1.06078	KO_1Way up vs WT_12mo	-1.03963	1.16985	0.0851261	Pygb	Pygb	brain glycogen phosphorylase	Pygb	110078	110078	2 G3|2 74.74 cM	protein-coding	26.869	26.8264	26.9115	+0.5σ	26.6656	26.8431	26.8671	26.8566	26.8995	26.939	26.8665	26.8795	27.0702	26.8022
522	588	P70333	Hnrnph2	5	5	22.1286	22.2021	0.201984	0.950369	-1.05222	KO_1Way down vs WT_12mo	-1.14494	1.03412	-0.0734399	Hnrnph2	Hnrnph2	heterogeneous nuclear ribonucleoprotein H2	Hnrnph2	56258	56258	X E3|X 56.2 cM	protein-coding	22.1654	22.1286	22.2021	-0.5σ	22.2652	22.1013	22.084	22.2725	22.2873	22.093	22.1398	22.0405	22.1827	22.1872
1167	589	Q8CDV7	Entpd1	5	5	19.1081	18.7126	0.202183	1.31535	1.31535	KO_1Way up vs WT_12mo	-1.19824	2.07312	0.395443	Entpd1	Entpd1	ectonucleoside triphosphate diphosphohydrolase 1	Entpd1	12495	12495	19 C3|19 34.25 cM	protein-coding	18.9104	18.7126	19.1081	+2σ	18.7513	18.7325	19.3586	18.1592	18.5615	18.8368	19.3941	19.7406	19.0158	18.5531
81	590	Q00897	Serpina1d	5	5	25.6722	25.475	0.202273	1.14652	1.14652	KO_1Way up vs WT_12mo	-1.09447	1.43869	0.197261	Serpina1d	Serpina1d	serine (or cysteine) peptidase inhibitor, clade A, member 1D	Serpina1d	20703	20703	12 E|12 52.98 cM	protein-coding	25.5736	25.475	25.6722	+1σ	25.7305	25.3915	25.6242	25.3443	25.2842	25.8103	25.6655	25.3224	25.9936	25.5692
920	591	A0A0R4IZW8	Capns1	5	5	17.6335	17.3983	0.202465	1.17712	1.17712	KO_1Way up vs WT_12mo	-1.11381	1.54331	0.235264	Capns1	Capns1	calpain, small subunit 1	Capns1	12336	12336	7 B1|7 17.31 cM	protein-coding	17.5159	17.3983	17.6335	+1σ	17.252	17.4313	17.4711	17.3344	17.5025	17.0441	17.8082	17.8758	17.5198	17.9198
1467	592	P51660	Hsd17b4	5	5	17.9837	18.2198	0.204052	0.849014	-1.17784	KO_1Way down vs WT_12mo	-1.54745	1.11544	-0.23614	Hsd17b4	Hsd17b4	hydroxysteroid (17-beta) dehydrogenase 4	Hsd17b4	15488	15488	18|18 D1	protein-coding	18.1017	17.9837	18.2198	-1σ	17.9658	18.1335	18.1874	18.6249	18.1874	18.3464	18.0178	17.6168	17.7722	18.1651
1494	593	Q9D9V3	Echdc1	5	5	16.9993	17.5125	0.204527	0.700688	-1.42717	KO_1Way down vs WT_12mo	-2.58438	1.26884	-0.513156	Echdc1	Echdc1	enoyl Coenzyme A hydratase domain containing 1	Echdc1	52665	52665	10 A4|10 16.59 cM	protein-coding	17.2559	16.9993	17.5125	-2σ	17.4093	18.215	17.4093	17.1308	17.3979	17.2775	17.3821	17.5766	15.7627	16.9976
586	594	P63028	Tpt1	5	5	21.6698	21.4799	0.206422	1.14072	1.14072	KO_1Way up vs WT_12mo	-1.09325	1.42257	0.189939	Tpt1	Tpt1	tumor protein, translationally-controlled 1	Tpt1	22070	22070	14 D3|14 40.29 cM	protein-coding	21.5749	21.4799	21.6698	+1σ	21.1815	21.3914	21.3871	21.6242	21.8152	21.8139	21.6036	21.8348	21.7231	21.3736
591	595	P68510	Ywhah	5	5	21.8058	21.8798	0.206643	0.949945	-1.05269	KO_1Way down vs WT_12mo	-1.14743	1.03543	-0.0740846	Ywhah	Ywhah	tyrosine 3-monooxygenase/tryptophan 5-monooxygenase activation protein, eta polypeptide	Ywhah	22629	22629	5|5 B1	protein-coding	21.8428	21.8058	21.8798	-0.5σ	21.9604	21.7968	21.8033	21.8841	21.9546	21.9114	21.7948	21.7179	21.7179	21.8867
1103	596	Q9QX60	Dguok	5	5	19.8021	19.5814	0.206948	1.1653	1.1653	KO_1Way up vs WT_12mo	-1.10951	1.50662	0.220698	Dguok	Dguok	deoxyguanosine kinase	Dguok	27369	27369	6 C3|6 35.94 cM	protein-coding	19.6917	19.5814	19.8021	+1σ	19.6739	19.335	19.8523	19.8801	19.1657	19.8497	19.9197	19.8953	19.837	19.5089
1696	597	Q8CIH9	Ppat	5	5	19.2124	18.2268	0.207691	1.98017	1.98017	KO_1Way up vs WT_12mo	-1.59389	6.24978	0.985626	Ppat	Ppat	phosphoribosyl pyrophosphate amidotransferase	Ppat	231327	231327	5|5 C3.3	protein-coding	18.7196	18.2268	19.2124	+3σ	17.7583	17.9519	18.0721	20.1134	17.238	19.3413	19.9557	19.6853	19.916	17.1637
739	598	G3X9Q1	Itga7	5	5	21.5569	21.6175	0.209947	0.958885	-1.04288	KO_1Way down vs WT_12mo	-1.11964	1.02946	-0.0605696	Itga7	Itga7	integrin alpha 7	Itga7	16404	16404	10 D3|10 77.2 cM	protein-coding	21.5872	21.5569	21.6175	-0.5σ	21.5173	21.5852	21.6687	21.6014	21.7148	21.5951	21.5622	21.6384	21.5029	21.486
89	599	Q61838	Pzp	5	5	25.509	25.3306	0.210812	1.13162	1.13162	KO_1Way up vs WT_12mo	-1.08976	1.39552	0.178395	Pzp	Pzp	PZP, alpha-2-macroglobulin like	Pzp	11287	11287	6 F3|6 63.02 cM	protein-coding	25.4198	25.3306	25.509	+0.5σ	25.3385	24.8959	25.4042	25.4298	25.5847	25.6398	25.4026	25.5249	25.3378	25.6398
240	600	P15626	Gstm2	5	5	26.705	26.6315	0.211105	1.05228	1.05228	KO_1Way up vs WT_12mo	-1.03612	1.14728	0.0735124	Gstm2	Gstm2	glutathione S-transferase, mu 2	Gstm2	14863	14863	3|3 F2.3	protein-coding	26.6683	26.6315	26.705	+0.5σ	26.7663	26.6201	26.6656	26.4855	26.6201	26.6639	26.7855	26.619	26.707	26.7498
1782	601	Q9D0T1	Snu13	5	5	18.2173	18.3909	0.211281	0.886661	-1.12783	KO_1Way down vs WT_12mo	-1.38326	1.08747	-0.173545	Snu13	Snu13	SNU13 homolog, small nuclear ribonucleoprotein (U4/U6.U5)	Snu13	20826	20826	15 E1|15 38.38 cM	protein-coding	18.3041	18.2173	18.3909	-1σ	18.424	18.424	18.3629	18.0168	18.7268	18.3383	18.2866	18.2664	18.1978	17.9977
1698	602	G3X8T3	Ctsa	5	5	15.2969	14.9067	0.211418	1.3106	1.3106	KO_1Way up vs WT_12mo	-1.20769	2.07443	0.390232	Ctsa	Ctsa	cathepsin A	Ctsa	19025	19025	2 H3|2 85.27 cM	protein-coding	15.1018	14.9067	15.2969	+2σ	14.8048	14.8458	15.033	14.7717	15.0783	14.376	15.1633	15.71	16.0243	15.2111
1810	603	A2AQB2	Neb	5	5	19.2012	19.0872	0.213171	1.0822	1.0822	KO_1Way up vs WT_12mo	-1.05726	1.23822	0.113968	Neb	Neb	nebulin	Neb	17996	17996	2 C1.1|2 29.98 cM	protein-coding	19.1442	19.0872	19.2012	+0.5σ	19.2597	18.8355	19.1305	19.1092	19.1013	19.2575	19.1032	19.0944	19.2009	19.3501
969	604	E9QAZ2	Rpl15-ps6	5	5	21.8357	22.0169	0.214158	0.881986	-1.1338	KO_1Way down vs WT_12mo	-1.40521	1.09311	-0.181172	Rpl15-ps6	Rpl15-ps6	ribosomal protein L15, pseudogene 6	Rpl15-ps6	100039748	100039748	15|15 C	pseudo	21.9263	21.8357	22.0169	-1σ	21.8071	22.497	21.9223	22.0052	21.8528	21.9877	21.7127	21.8439	21.7429	21.8913
277	605	Q9QYG0	Ndrg2	5	5	23.7092	23.8506	0.214164	0.906582	-1.10304	KO_1Way down vs WT_12mo	-1.30432	1.07201	-0.14149	Ndrg2	Ndrg2	N-myc downstream regulated gene 2	Ndrg2	29811	29811	14|14 C2	protein-coding	23.7799	23.7092	23.8506	-0.5σ	23.5774	23.8602	23.9534	23.7982	24.0641	23.5606	23.6586	23.6014	23.9011	23.8241
956	606	Q921T2	Tor1aip1	5	5	18.0032	18.3498	0.215116	0.786431	-1.27157	KO_1Way down vs WT_12mo	-1.91894	1.18681	-0.346609	Tor1aip1	Tor1aip1	torsin A interacting protein 1	Tor1aip1	208263	208263	1|1 G3	protein-coding	18.1765	18.0032	18.3498	-2σ	18.2313	18.1749	18.1126	18.8205	18.4098	17.9722	17.3555	17.8701	18.0687	18.7496
866	607	P63011	Rab3a	5	5	21.5529	21.4399	0.215328	1.08147	1.08147	KO_1Way up vs WT_12mo	-1.0575	1.23683	0.112999	Rab3a	Rab3a	RAB3A, member RAS oncogene family	Rab3a	19339	19339	8 B3.3|8 34.15 cM	protein-coding	21.4964	21.4399	21.5529	+0.5σ	21.5199	21.3571	21.5004	21.5282	21.2939	21.5669	21.7744	21.6075	21.3889	21.4267
1293	608	A0A0A6YXW6	Igha	5	5	19.9682	20.6252	0.215471	0.634182	-1.57683	KO_1Way down vs WT_12mo	-3.4424	1.38449	-0.657032	Igha	Igha	immunoglobulin heavy constant alpha	Igha	238447	238447	12 F1|12 62.09 cM	other	20.2967	19.9682	20.6252	-2σ	20.9036	21.1413	21.211	18.9119	20.9582	19.4547	20.0507	20.6662	20.1846	19.4848
1288	609	Q8BXC0	Ptgis	5	5	19.2336	19.1186	0.216146	1.08298	1.08298	KO_1Way up vs WT_12mo	-1.05884	1.24186	0.115012	Ptgis	Ptgis	prostaglandin I2 (prostacyclin) synthase	Ptgis	19223	19223	2|2 H3	protein-coding	19.1761	19.1186	19.2336	+0.5σ	19.1923	18.9973	19.3537	18.9819	19.068	19.3501	19.2289	19.0563	19.2289	19.3041
1565	610	Q9D710	Tmx2	5	5	15.7268	15.5253	0.216892	1.1499	1.1499	KO_1Way up vs WT_12mo	-1.10583	1.46219	0.201504	Tmx2	Tmx2	thioredoxin-related transmembrane protein 2	Tmx2	66958	66958	2|2 D	protein-coding	15.626	15.5253	15.7268	+1σ	15.4393	15.2761	15.8695	15.4393	15.6021	15.71	15.4991	15.4707	16.0395	15.9145
519	611	Q99JB8	Pacsin3	5	5	21.9632	22.1209	0.217285	0.896474	-1.11548	KO_1Way down vs WT_12mo	-1.34643	1.08208	-0.157667	Pacsin3	Pacsin3	protein kinase C and casein kinase substrate in neurons 3	Pacsin3	80708	80708	2|2 E1	protein-coding	22.042	21.9632	22.1209	-0.5σ	22.1991	22.194	22.1059	21.98	22.1254	22.1275	21.5374	21.9641	22.1344	22.0527
515	612	E9QPX3	Ndufs4	5	5	24.607	24.6771	0.217719	0.952624	-1.04973	KO_1Way down vs WT_12mo	-1.14133	1.03575	-0.0700215	Ndufs4	Ndufs4	NADH:ubiquinone oxidoreductase core subunit S4	Ndufs4	17993	17993	13|13 D2.2	protein-coding	24.6421	24.607	24.6771	-0.5σ	24.6535	24.6654	24.6309	24.7595	24.676	24.5404	24.5125	24.7475	24.6943	24.5404
971	613	A2AH25	Arhgap1	5	5	21.4075	21.3139	0.217754	1.06707	1.06707	KO_1Way up vs WT_12mo	-1.04811	1.19342	0.093656	Arhgap1	Arhgap1	Rho GTPase activating protein 1	Arhgap1	228359	228359	2|2 E1	protein-coding	21.3607	21.3139	21.4075	+0.5σ	21.4731	21.4238	21.1815	21.2158	21.2751	21.3311	21.4577	21.4267	21.3034	21.5187
301	614	Q8VCT4	Ces1d	5	5	25.0977	24.9539	0.217891	1.10476	1.10476	KO_1Way up vs WT_12mo	-1.07483	1.31182	0.143729	Ces1d	Ces1d	carboxylesterase 1D	Ces1d	104158	104158	8|8 C5	protein-coding	25.0258	24.9539	25.0977	+0.5σ	25.0613	24.6409	24.9133	25.0928	25.0613	25.2623	24.9044	25.1899	24.982	25.1498
973	615	A0A0R4J093	Cmpk1	5	5	20.6105	20.3883	0.218114	1.16649	1.16649	KO_1Way up vs WT_12mo	-1.11817	1.52149	0.222176	Cmpk1	Cmpk1	cytidine monophosphate (UMP-CMP) kinase 1	Cmpk1	66588	66588	4|4 D1	protein-coding	20.4994	20.3883	20.6105	+1σ	20.5014	19.8903	20.5506	20.5506	20.4485	20.452	20.7932	20.2591	20.7766	20.7715
1291	616	Q8VDC1	Fyco1	5	5	19.9579	20.128	0.218253	0.88876	-1.12516	KO_1Way down vs WT_12mo	-1.37913	1.08937	-0.170135	Fyco1	Fyco1	FYVE and coiled-coil domain containing 1	Fyco1	17281	17281	9 F4|9 74.52 cM	protein-coding	20.043	19.9579	20.128	-1σ	20.5575	20.0206	19.9274	20.1012	20.0335	19.7641	19.9657	19.9109	20.1499	19.9988
686	617	P27661	H2ax	5	5	21.1475	21.2816	0.219574	0.911243	-1.0974	KO_1Way down vs WT_12mo	-1.289	1.07033	-0.134092	H2ax	H2ax	H2A.X variant histone	H2ax	15270	15270	9 A5.2|9 24.84 cM	protein-coding	21.2145	21.1475	21.2816	-0.5σ	21.2256	21.1239	21.2293	21.4177	21.4112	20.9137	20.9998	21.2139	21.2496	21.3604
1198	618	Q8VCT3	Rnpep	5	5	18.9945	19.2124	0.219739	0.859806	-1.16305	KO_1Way down vs WT_12mo	-1.51083	1.11691	-0.217916	Rnpep	Rnpep	arginyl aminopeptidase (aminopeptidase B)	Rnpep	215615	215615	1|1 E4	protein-coding	19.1034	18.9945	19.2124	-1σ	19.5249	19.3537	18.6104	19.3131	19.2597	18.9698	19.1468	18.9986	18.8548	19.0023
1221	619	Q9CVB6	Arpc2	5	5	19.9121	19.7457	0.219953	1.12226	1.12226	KO_1Way up vs WT_12mo	-1.08821	1.37055	0.166402	Arpc2	Arpc2	actin related protein 2/3 complex, subunit 2	Arpc2	76709	76709	1 38.49 cM|1 C3	protein-coding	19.8289	19.7457	19.9121	+0.5σ	19.9637	19.9317	19.6992	19.6641	19.4697	20.0756	19.6853	20.0804	19.7299	19.9891
1189	620	Q7TQD2	Tppp	5	5	18.3063	18.453	0.220341	0.903352	-1.10699	KO_1Way down vs WT_12mo	-1.32041	1.07751	-0.14664	Tppp	Tppp	tubulin polymerization promoting protein	Tppp	72948	72948	13|13 C1	protein-coding	18.3797	18.3063	18.453	-0.5σ	18.37	18.3377	18.6729	18.4024	18.4819	18.0232	18.3121	18.2866	18.6076	18.302
76	621	Q01853	Vcp	5	5	25.8606	25.7923	0.220732	1.04849	1.04849	KO_1Way up vs WT_12mo	-1.03547	1.13831	0.0683067	Vcp	Vcp	valosin containing protein	Vcp	269523	269523	4 A5|4 22.95 cM	protein-coding	25.8265	25.7923	25.8606	+0.5σ	25.7134	25.744	25.8981	25.8217	25.7844	25.9546	25.7928	25.8103	25.962	25.7834
1190	622	A0A140T8J4	Hebp1	5	5	16.6764	17.1742	0.221487	0.708198	-1.41203	KO_1Way down vs WT_12mo	-2.57312	1.29054	-0.497775	Hebp1	Hebp1	heme binding protein 1	Hebp1	15199	15199	6|6 G1	protein-coding	16.9253	16.6764	17.1742	-2σ	16.9787	17.4192	17.606	16.6869	17.1803	16.6441	15.9547	16.0395	17.8201	16.9237
1890	623	H3BLL2	Atpaf1	5	5	23.11	23.0271	0.222	1.05911	1.05911	KO_1Way up vs WT_12mo	-1.0435	1.17051	0.0828567	Atpaf1	Atpaf1	ATP synthase mitochondrial F1 complex assembly factor 1	Atpaf1	230649	230649	4|4 D1	protein-coding	23.0685	23.0271	23.11	+0.5σ	22.965	23.2155	23.0884	22.9595	22.9073	23.0812	23.1018	23.2208	23.0871	23.0591
267	624	Q8BMF3	Me3	5	5	22.84	22.9198	0.222339	0.946182	-1.05688	KO_1Way down vs WT_12mo	-1.16385	1.04195	-0.0798109	Me3	Me3	malic enzyme 3, NADP(+)-dependent, mitochondrial	Me3	109264	109264	7|7 D3	protein-coding	22.8799	22.84	22.9198	-0.5σ	22.9731	22.8335	22.9784	22.9016	22.9125	22.7644	22.8446	22.7644	23.0483	22.7782
647	625	O89086	Rbm3	5	5	20.8086	20.9026	0.223735	0.936924	-1.06732	KO_1Way down vs WT_12mo	-1.19611	1.04998	-0.093996	Rbm3	Rbm3	RNA binding motif (RNP1, RRM) protein 3	Rbm3	19652	19652	X A1.1|X 3.68 cM	protein-coding	20.8556	20.8086	20.9026	-0.5σ	20.9078	20.8403	20.8025	20.9214	21.0411	20.7514	20.6899	20.7039	20.9347	20.9632
1273	626	G3X9F4	Tmem143	5	5	18.9015	18.0022	0.223834	1.86517	1.86517	KO_1Way up vs WT_12mo	-1.595	5.54878	0.899306	Tmem143	Tmem143	transmembrane protein 143	Tmem143	70209	70209	7|7 B3	protein-coding	18.4519	18.0022	18.9015	+3σ	17.7528	18.1785	17.8237	18.2973	17.9586	18.4305	17.6004	18.5576	21.5117	18.4072
343	627	P17879	Hspa1b	5	5	20.7477	20.9114	0.224516	0.892738	-1.12015	KO_1Way down vs WT_12mo	-1.36646	1.08905	-0.163691	Hspa1b	Hspa1b	heat shock protein 1B	Hspa1b	15511	15511	17 B1|17 18.5 cM	protein-coding	20.8296	20.7477	20.9114	-0.5σ	21.0564	20.9582	20.9278	20.5681	21.0466	20.5371	20.9662	20.6546	20.9407	20.64
849	628	Q9CQ75	Ndufa2	5	5	24.8007	24.9051	0.226717	0.930204	-1.07503	KO_1Way down vs WT_12mo	-1.22111	1.0566	-0.104381	Ndufa2	Ndufa2	NADH:ubiquinone oxidoreductase subunit A2	Ndufa2	17991	17991	18|18 B2	protein-coding	24.8529	24.8007	24.9051	-0.5σ	25.1314	24.9552	24.7491	24.9688	24.721	24.8829	24.7767	24.7767	24.7475	24.8198
1427	629	Q9CQI3	Gmfb	5	5	18.4022	18.7195	0.22828	0.802535	-1.24605	KO_1Way down vs WT_12mo	-1.83821	1.18392	-0.317364	Gmfb	Gmfb	glia maturation factor, beta	Gmfb	63985	63985	14 C1|14 24.32 cM	protein-coding	18.5608	18.4022	18.7195	-1σ	18.3213	19.0107	18.5943	19.2565	18.4149	18.0494	18.4354	18.678	18.0113	18.8368
759	630	P68037	Ube2l3	5	5	22.1319	22.0636	0.228447	1.04845	1.04845	KO_1Way up vs WT_12mo	-1.03702	1.13995	0.0682646	Ube2l3	Ube2l3	ubiquitin-conjugating enzyme E2L 3	Ube2l3	22195	22195	16 A3|16 10.63 cM	protein-coding	22.0978	22.0636	22.1319	+0.5σ	22.0876	22.0763	22.0262	22.1991	21.9289	22.0742	22.1622	22.09	22.1043	22.2287
200	631	Q3ULD5	Mccc2	5	5	23.8763	23.9589	0.229606	0.944356	-1.05892	KO_1Way down vs WT_12mo	-1.17206	1.04525	-0.0825977	Mccc2	Mccc2	methylcrotonoyl-Coenzyme A carboxylase 2 (beta)	Mccc2	78038	78038	13|13 D1	protein-coding	23.9176	23.8763	23.9589	-0.5σ	24.0138	23.8767	24.0376	23.8371	24.0292	23.9664	23.8241	23.7385	23.9973	23.855
819	632	Q9D5T0	Atad1	5	5	21.0756	21.2588	0.230496	0.880701	-1.13546	KO_1Way down vs WT_12mo	-1.42297	1.10371	-0.183276	Atad1	Atad1	ATPase family, AAA domain containing 1	Atad1	67979	67979	19|19 C1	protein-coding	21.1672	21.0756	21.2588	-1σ	21.1649	21.1192	21.7758	21.211	21.0233	21.0252	20.9407	21.0544	21.1395	21.218
188	633	Q07417	Acads	5	5	25.6638	25.7468	0.23087	0.944094	-1.05922	KO_1Way down vs WT_12mo	-1.17332	1.04579	-0.0829979	Acads	Acads	acyl-Coenzyme A dehydrogenase, short chain	Acads	11409	11409	5 55.99 cM|5 F	protein-coding	25.7053	25.6638	25.7468	-0.5σ	25.7844	25.8113	25.6962	25.641	25.8013	25.8207	25.6135	25.6823	25.7117	25.491
1369	634	Q99J77	Nans	5	5	19.9695	20.1281	0.23102	0.895883	-1.11622	KO_1Way down vs WT_12mo	-1.35735	1.08941	-0.158617	Nans	Nans	N-acetylneuraminic acid synthase (sialic acid synthase)	Nans	94181	94181	4|4 B1	protein-coding	20.0488	19.9695	20.1281	-0.5σ	20.0449	20.426	19.7988	20.0009	20.37	20.022	19.8916	20.0353	19.8916	20.0069
841	635	Q9DB73	Cyb5r1	5	5	20.078	19.8352	0.231031	1.18335	1.18335	KO_1Way up vs WT_12mo	-1.14013	1.59656	0.242881	Cyb5r1	Cyb5r1	cytochrome b5 reductase 1	Cyb5r1	72017	72017	1|1 E4	protein-coding	19.9566	19.8352	20.078	+1σ	19.4185	20.2778	20.0562	19.5431	19.8801	19.7329	20.1965	20.0069	20.1432	20.3106
1655	636	Q6NVE9	Pptc7	5	5	19.7513	19.5032	0.232242	1.18766	1.18766	KO_1Way up vs WT_12mo	-1.14436	1.61416	0.248121	Pptc7	Pptc7	PTC7 protein phosphatase homolog	Pptc7	320717	320717	5|5 F	protein-coding	19.6273	19.5032	19.7513	+1σ	19.0933	19.4653	19.6739	19.5011	19.7824	19.929	20.0804	19.7959	19.187	19.7641
92	637	Q8VDN2	Atp1a1	5	5	26.8313	26.9061	0.233422	0.949445	-1.05325	KO_1Way down vs WT_12mo	-1.15568	1.04178	-0.0748437	Atp1a1	Atp1a1	ATPase, Na+/K+ transporting, alpha 1 polypeptide	Atp1a1	11928	11928	3 F2.2|3 44.3 cM	protein-coding	26.8687	26.8313	26.9061	-0.5σ	26.8431	26.8671	26.8995	26.9127	27.0084	26.7498	26.8303	26.8022	26.7498	27.0243
30	638	P11531	Dmd	5	5	25.3056	25.283	0.234749	1.0158	1.0158	KO_1Way up vs WT_12mo	-1.01253	1.04477	0.02261	Dmd	Dmd	dystrophin, muscular dystrophy	Dmd	13405	13405	X C1|X 38.38 cM	protein-coding	25.2943	25.283	25.3056	+0.5σ	25.2726	25.3234	25.2479	25.2726	25.2985	25.2826	25.3437	25.2826	25.2968	25.3224
926	639	P09542	Myl3	5	5	19.5254	19.9095	0.23584	0.76626	-1.30504	KO_1Way down vs WT_12mo	-2.10693	1.23709	-0.384094	Myl3	Myl3	myosin, light polypeptide 3	Myl3	17897	17897	9 F2|9 60.69 cM	protein-coding	19.7174	19.5254	19.9095	-2σ	19.5191	19.6136	19.4185	20.2275	20.7688	19.6295	19.0649	20.0183	19.4712	19.4433
1835	640	Q9WV85	Nme3	5	5	18.1342	18.3446	0.235879	0.864331	-1.15696	KO_1Way down vs WT_12mo	-1.50402	1.1236	-0.210345	Nme3	Nme3	NME/NM23 nucleoside diphosphate kinase 3	Nme3	79059	79059	17|17 A3.3	protein-coding	18.2394	18.1342	18.3446	-1σ	18.3377	18.3567	18.6417	18.0036	18.3833	18.4033	18.1297	18.4251	17.7534	17.9598
302	641	Q8BH95	Echs1	5	5	26.4093	26.4772	0.235954	0.954022	-1.04819	KO_1Way down vs WT_12mo	-1.14085	1.03835	-0.0679051	Echs1	Echs1	enoyl Coenzyme A hydratase, short chain, 1, mitochondrial	Echs1	93747	93747	7|7 F4	protein-coding	26.4432	26.4093	26.4772	-0.5σ	26.4009	26.556	26.5134	26.572	26.3439	26.3428	26.4388	26.4834	26.4388	26.3428
187	642	Q9D0K2	Oxct1	5	5	25.3761	25.2858	0.236709	1.06462	1.06462	KO_1Way up vs WT_12mo	-1.05156	1.19186	0.0903424	Oxct1	Oxct1	3-oxoacid CoA transferase 1	Oxct1	67041	67041	15|15 A1	protein-coding	25.331	25.2858	25.3761	+0.5σ	25.0826	25.3316	25.4191	25.4042	25.1913	25.3785	25.4377	25.3903	25.2714	25.4026
306	643	P26443	Glud1	5	5	23.934	23.7507	0.236763	1.13543	1.13543	KO_1Way up vs WT_12mo	-1.10738	1.42762	0.183233	Glud1	Glud1	glutamate dehydrogenase 1	Glud1	14661	14661	14 B|14 20.8 cM	protein-coding	23.8423	23.7507	23.934	+0.5σ	23.852	23.6672	23.6596	23.7875	23.7875	23.8872	23.8439	23.691	23.7769	24.4709
1570	644	Q3V117	Acly	5	5	16.4225	16.2705	0.238435	1.11105	1.11105	KO_1Way up vs WT_12mo	-1.08905	1.34436	0.151925	Acly	Acly	ATP citrate lyase	Acly	104112	104112	11|11 D	protein-coding	16.3465	16.2705	16.4225	+0.5σ	16.3695	15.9137	16.3365	16.2226	16.5104	16.1675	16.4544	16.5111	16.4977	16.4817
1977	645	Q8VBT2	Sds	5	5	16.0564	16.6278	0.238531	0.672984	-1.48592	KO_1Way down vs WT_12mo	-3.04363	1.37848	-0.571356	Sds	Sds	serine dehydratase	Sds	231691	231691	5|5 F	protein-coding	16.3421	16.0564	16.6278	-2σ	16.8869	17.4953	16.7554	16.8757	15.1257	16.1153	15.6308	16.0554	16.7965	15.6842
1019	646	P56135	Atp5j2	5	5	26.0885	25.8464	0.239113	1.18278	1.18278	KO_1Way up vs WT_12mo	-1.14621	1.60351	0.242177	Atp5j2	Atp5j2	ATP synthase, H+ transporting, mitochondrial F0 complex, subunit F2	Atp5j2	57423	57423	5|5 G2	protein-coding	25.9674	25.8464	26.0885	+1σ	25.8304	25.9143	25.8431	25.7134	25.9306	25.8827	25.9781	25.8689	26.8303	25.8827
1844	647	O35683	Ndufa1	5	5	21.8305	21.6805	0.239174	1.10956	1.10956	KO_1Way up vs WT_12mo	-1.08822	1.33973	0.149986	Ndufa1	Ndufa1	NADH:ubiquinone oxidoreductase subunit A1	Ndufa1	54405	54405	X|X A3.3	protein-coding	21.7555	21.6805	21.8305	+0.5σ	21.2972	21.9137	21.7061	21.6889	21.7968	21.7335	22.0405	21.7382	21.8056	21.8348
967	648	Q80W54	Zmpste24	5	5	20.1976	19.9212	0.239332	1.21117	1.21117	KO_1Way up vs WT_12mo	-1.16874	1.71445	0.276398	Zmpste24	Zmpste24	zinc metallopeptidase, STE24	Zmpste24	230709	230709	4|4 D2.2	protein-coding	20.0594	19.9212	20.1976	+1σ	19.3636	20.1012	19.6833	20.2332	20.2248	19.6704	20.3071	20.4001	20.3352	20.2753
165	649	P07356	Anxa2	5	5	25.7299	25.6658	0.23954	1.04545	1.04545	KO_1Way up vs WT_12mo	-1.03688	1.13328	0.0641299	Anxa2	Anxa2	annexin A2	Anxa2	12306	12306	9 C|9 38.58 cM	protein-coding	25.6978	25.6658	25.7299	+0.5σ	25.744	25.6671	25.5372	25.6671	25.7134	25.7559	25.7559	25.6949	25.6135	25.8293
1351	650	Q9CX34	Sugt1	5	5	16.9905	17.4787	0.23966	0.712941	-1.40264	KO_1Way down vs WT_12mo	-2.59234	1.31765	-0.488146	Sugt1	Sugt1	SGT1, suppressor of G2 allele of SKP1 (S. cerevisiae)	Sugt1	67955	67955	14|14 D3	protein-coding	17.2346	16.9905	17.4787	-2σ	17.9249	16.2444	17.1548	18.0917	17.9776	17.0315	17.0441	17.0724	17.3893	16.4154
495	651	Q99PL5	Rrbp1	5	5	20.748	20.6493	0.240083	1.07082	1.07082	KO_1Way up vs WT_12mo	-1.0575	1.21258	0.0987126	Rrbp1	Rrbp1	ribosome binding protein 1	Rrbp1	81910	81910	2|2 G1	protein-coding	20.6987	20.6493	20.748	+0.5σ	20.5341	20.697	20.6312	20.7816	20.6027	20.9937	20.7443	20.622	20.7255	20.6546
1393	652	Q9CQH7	Btf3l4	5	5	18.207	17.959	0.240496	1.18759	1.18759	KO_1Way up vs WT_12mo	-1.15117	1.62358	0.248042	Btf3l4	Btf3l4	basic transcription factor 3-like 4	Btf3l4	70533	70533	4|4 C7	protein-coding	18.083	17.959	18.207	+1σ	17.3646	18.1126	18.0395	17.9405	18.3377	18.3906	17.8284	18.3967	18.0972	18.3221
1523	653	O08797	Serpinb9	5	5	15.6248	15.2087	0.240608	1.33431	1.33431	KO_1Way up vs WT_12mo	-1.26654	2.25494	0.416096	Serpinb9	Serpinb9	serine (or cysteine) peptidase inhibitor, clade B, member 9	Serpinb9	20723	20723	13 A3.2- A3.3|13 13.79 cM	protein-coding	15.4168	15.2087	15.6248	+2σ	14.7315	15.2413	14.5698	15.4985	16.0024	14.9993	16.1675	15.9145	15.6027	15.44
625	654	Q3UM45	Ppp1r7	5	5	20.7535	20.5867	0.242047	1.1225	1.1225	KO_1Way up vs WT_12mo	-1.10008	1.38611	0.16672	Ppp1r7	Ppp1r7	protein phosphatase 1, regulatory subunit 7	Ppp1r7	66385	66385	1|1 D	protein-coding	20.6701	20.5867	20.7535	+0.5σ	20.4305	20.5839	20.9734	20.6161	20.3297	20.8887	20.7883	20.4807	20.8692	20.7404
760	655	Q9JII6	Akr1a1	5	5	21.8671	21.7379	0.242369	1.09368	1.09368	KO_1Way up vs WT_12mo	-1.07684	1.28806	0.129194	Akr1a1	Akr1a1	aldo-keto reductase family 1, member A1 (aldehyde reductase)	Akr1a1	58810	58810	4|4 D1	protein-coding	21.8025	21.7379	21.8671	+0.5σ	21.5986	21.8033	21.6777	21.6916	21.9184	21.5838	21.9211	21.9738	21.7778	22.0791
41	656	Q5SXR6	Cltc	5	5	25.3636	25.4041	0.242593	0.972316	-1.02847	KO_1Way down vs WT_12mo	-1.08262	1.02351	-0.040503	Cltc	Cltc	clathrin, heavy polypeptide (Hc)	Cltc	67300	67300	11|11 C	protein-coding	25.3838	25.3636	25.4041	-0.5σ	25.4298	25.3665	25.4389	25.4191	25.3665	25.3378	25.4752	25.3307	25.3437	25.3307
1257	657	Q9D8L3	Ssr4	5	5	20.8195	20.6904	0.243725	1.09363	1.09363	KO_1Way up vs WT_12mo	-1.07735	1.28854	0.129124	Ssr4	Ssr4	signal sequence receptor, delta	Ssr4	20832	20832	X A7.3|X 37.41 cM	protein-coding	20.755	20.6904	20.8195	+0.5σ	20.6572	20.6434	20.6833	20.6771	20.7909	20.7477	20.8825	20.4693	20.9795	21.0185
1458	658	O08599	Stxbp1	5	5	18.1268	17.9326	0.243875	1.14406	1.14406	KO_1Way up vs WT_12mo	-1.11865	1.46418	0.194166	Stxbp1	Stxbp1	syntaxin binding protein 1	Stxbp1	20910	20910	2 B|2 22.09 cM	protein-coding	18.0297	17.9326	18.1268	+1σ	18.2815	17.555	17.835	18.1168	17.8748	17.8527	18.4251	18.1297	18.0924	18.1341
963	659	O35639	Anxa3	5	5	20.1649	20.0124	0.24444	1.11144	1.11144	KO_1Way up vs WT_12mo	-1.09229	1.3493	0.152429	Anxa3	Anxa3	annexin A3	Anxa3	11745	11745	5 E3|5 47.29 cM	protein-coding	20.0887	20.0124	20.1649	+0.5σ	19.9539	20.3049	19.9418	19.8678	19.9938	20.1154	20.4646	20.2912	19.9745	19.9786
1301	660	Q8VHM5	Hnrnpr	5	5	19.1872	19.0214	0.244547	1.12179	1.12179	KO_1Way up vs WT_12mo	-1.10084	1.38531	0.165802	Hnrnpr	Hnrnpr	heterogeneous nuclear ribonucleoprotein R	Hnrnpr	74326	74326	4|4 D3	protein-coding	19.1043	19.0214	19.1872	+0.5σ	18.9507	18.6641	19.3487	18.9636	19.18	19.1945	19.1288	19.4197	19.1526	19.0405
1656	661	Q9D1B9	Mrpl28	5	5	14.786	15.013	0.244801	0.854446	-1.17035	KO_1Way down vs WT_12mo	-1.56247	1.14073	-0.226938	Mrpl28	Mrpl28	mitochondrial ribosomal protein L28	Mrpl28	68611	68611	17|17 A3.3	protein-coding	14.8995	14.786	15.013	-1σ	14.6142	15.1628	15.4091	15.033	14.8458	14.772	14.6145	14.5701	15.2418	14.7318
1686	662	Q9Z126	Pf4	5	5	18.5168	18.1535	0.244884	1.28641	1.28641	KO_1Way up vs WT_12mo	-1.23479	2.0434	0.363351	Pf4	Pf4	platelet factor 4	Pf4	56744	56744	5|5 E1	protein-coding	18.3351	18.1535	18.5168	+1σ	17.9098	18.2398	18.7904	17.6564	18.1711	18.2983	18.8594	18.5179	17.8284	19.0802
1965	663	F8WIA1	Clip1	5	5	19.1837	18.8292	0.245659	1.2786	1.2786	KO_1Way up vs WT_12mo	-1.2295	2.01001	0.354562	Clip1	Clip1	CAP-GLY domain containing linker protein 1	Clip1	56430	56430	5|5 F	protein-coding	19.0065	18.8292	19.1837	+1σ	18.1288	19.4596	18.9199	18.7634	18.8741	19.1468	18.5476	19.3972	19.6801	19.1468
204	664	O09161	Casq2	5	5	25.8748	25.9376	0.24591	0.957402	-1.04449	KO_1Way down vs WT_12mo	-1.13168	1.03732	-0.062803	Casq2	Casq2	calsequestrin 2	Casq2	12373	12373	3|3 F2.2	protein-coding	25.9062	25.8748	25.9376	-0.5σ	26.0278	25.9433	25.9628	25.8701	25.8839	25.8005	26.0267	25.8968	25.8293	25.8207
1600	665	Q8BG51	Rhot1	5	5	15.857	15.6729	0.246159	1.13611	1.13611	KO_1Way up vs WT_12mo	-1.11355	1.4373	0.184101	Rhot1	Rhot1	ras homolog family member T1	Rhot1	59040	59040	11 B5|11 47.62 cM	protein-coding	15.765	15.6729	15.857	+0.5σ	15.7617	16.0549	15.5351	15.3033	15.7094	15.7627	16.0395	16.0243	15.6308	15.8276
286	666	Q61171	Prdx2	5	5	26.1128	26.0564	0.247553	1.03986	1.03986	KO_1Way up vs WT_12mo	-1.03373	1.11779	0.0563936	Prdx2	Prdx2	peroxiredoxin 2	Prdx2	21672	21672	8 C3|8 41.4 cM	protein-coding	26.0846	26.0564	26.1128	+0.5σ	26.1323	26.0552	26.0278	25.9628	26.1038	26.1814	26.1023	26.1998	26.0537	26.0267
1964	667	Q921M7	Cyrib	5	5	20.745	20.5317	0.247802	1.15939	1.15939	KO_1Way up vs WT_12mo	-1.13392	1.52419	0.213362	Cyrib	Cyrib	CYFIP related Rac1 interactor B	Cyrib	223601	223601	15|15 D1	protein-coding	20.6383	20.5317	20.745	+1σ	20.6771	19.9418	20.5402	20.7496	20.7496	20.8585	20.5119	20.9662	20.7085	20.6799
1730	668	P59383	Lrrn4	5	5	18.2755	17.779	0.248273	1.41076	1.41076	KO_1Way up vs WT_12mo	-1.34063	2.66818	0.496473	Lrrn4	Lrrn4	leucine rich repeat neuronal 4	Lrrn4	320974	320974	2|2 F2	protein-coding	18.0272	17.779	18.2755	+2σ	17.5889	17.2204	16.7744	18.7049	18.6066	18.2404	17.9048	18.2072	18.4033	18.6218
1324	669	Q99LB2	Dhrs4	5	5	21.2737	21.3823	0.248951	0.927474	-1.0782	KO_1Way down vs WT_12mo	-1.23978	1.06647	-0.108621	Dhrs4	Dhrs4	dehydrogenase/reductase (SDR family) member 4	Dhrs4	28200	28200	14 C3|14 28.19 cM	protein-coding	21.328	21.2737	21.3823	-0.5σ	21.5134	21.2256	21.2553	21.5652	21.352	21.3147	21.0891	21.3345	21.4087	21.2214
1206	670	P01899	H2-D1	5	5	19.8197	19.5964	0.249497	1.16741	1.16741	KO_1Way up vs WT_12mo	-1.14186	1.55617	0.223308	H2-D1	H2-D1	histocompatibility 2, D region locus 1	H2-D1	14964	14964	17 B1|17 18.61 cM	protein-coding	19.7081	19.5964	19.8197	+1σ	19.6785	19.6042	19.2333	19.8868	19.5794	20.1704	20.097	19.6229	19.8187	19.3897
1186	671	O09117	Sypl	5	5	18.4397	18.6172	0.249716	0.884286	-1.13086	KO_1Way down vs WT_12mo	-1.42114	1.11128	-0.177416	Sypl	Sypl	synaptophysin-like protein	Sypl	19027	19027	12 A3|12 13.87 cM	protein-coding	18.5284	18.4397	18.6172	-1σ	18.3865	18.7223	18.9728	18.7184	18.2858	18.2322	18.6425	18.4433	18.3577	18.523
1736	672	Q9R1Z7	Pts	5	5	18.3323	18.1076	0.250865	1.16858	1.16858	KO_1Way up vs WT_12mo	-1.14388	1.56206	0.224754	Pts	Pts	6-pyruvoyl-tetrahydropterin synthase	Pts	19286	19286	9|9 A5.3	protein-coding	18.22	18.1076	18.3323	+1σ	17.8237	18.565	18.197	17.9249	18.0273	18.7194	18.0563	18.0494	18.3967	18.4398
599	673	Q3THE2	Myl12b	5	5	22.132	22.0323	0.25091	1.07156	1.07156	KO_1Way up vs WT_12mo	-1.06147	1.21881	0.0997095	Myl12b	Myl12b	myosin, light chain 12B, regulatory	Myl12b	67938	67938	17|17 E1.3	protein-coding	22.0821	22.0323	22.132	+0.5σ	21.8982	22.0804	21.9482	22.0504	22.1844	22.0625	22.2762	22.0625	21.9738	22.2852
1314	674	Q9D6S7	Mrrf	5	5	18.0377	18.2359	0.251328	0.871638	-1.14727	KO_1Way down vs WT_12mo	-1.48228	1.12617	-0.1982	Mrrf	Mrrf	mitochondrial ribosome recycling factor	Mrrf	67871	67871	2|2 B	protein-coding	18.1368	18.0377	18.2359	-1σ	18.0103	18.3865	18.5566	18.2914	17.9349	17.8201	18.2822	18.0881	18.2552	17.7431
502	675	O35206	Col15a1	5	5	23.1625	23.2593	0.252001	0.935081	-1.06943	KO_1Way down vs WT_12mo	-1.21226	1.05998	-0.0968361	Col15a1	Col15a1	collagen, type XV, alpha 1	Col15a1	12819	12819	4|4 B1	protein-coding	23.2109	23.1625	23.2593	-0.5σ	23.0496	23.3038	23.2227	23.3038	23.4168	23.3026	23.1839	23.1134	23.006	23.2067
1436	676	Q8BJ03	Cox15	5	5	17.2903	17.8438	0.252704	0.681366	-1.46764	KO_1Way down vs WT_12mo	-3.00836	1.39666	-0.553498	Cox15	Cox15	cytochrome c oxidase assembly protein 15	Cox15	226139	226139	19|19 C3	protein-coding	17.567	17.2903	17.8438	-2σ	17.9714	17.6443	17.9776	18.2654	17.3604	15.6576	17.8402	17.4531	18.0046	17.496
547	677	P14206	Rpsa	5	5	21.5921	21.5042	0.254623	1.06278	1.06278	KO_1Way up vs WT_12mo	-1.05498	1.19162	0.0878483	Rpsa	Rpsa	ribosomal protein SA	Rpsa	16785	16785	9 F4|9 71.41 cM	protein-coding	21.5481	21.5042	21.5921	+0.5σ	21.5236	21.588	21.5681	21.5236	21.3178	21.4985	21.5117	21.6036	21.7902	21.5564
919	678	Q60692	Psmb6	5	5	20.5939	20.5029	0.255181	1.06507	1.06507	KO_1Way up vs WT_12mo	-1.05714	1.19919	0.0909489	Psmb6	Psmb6	proteasome (prosome, macropain) subunit, beta type 6	Psmb6	19175	19175	11 B3|11 42.99 cM	protein-coding	20.5484	20.5029	20.5939	+0.5σ	20.605	20.5681	20.6076	20.4672	20.2668	20.4572	20.6281	20.5946	20.6799	20.6097
771	679	P05132	Prkaca	5	5	21.7096	21.6053	0.255471	1.07496	1.07496	KO_1Way up vs WT_12mo	-1.06589	1.23168	0.104289	Prkaca	Prkaca	protein kinase, cAMP dependent, catalytic, alpha	Prkaca	18747	18747	8|8 C2	protein-coding	21.6575	21.6053	21.7096	+0.5σ	21.5095	21.5652	21.5485	21.6777	21.7258	21.5804	21.5514	21.8867	21.8913	21.6384
403	680	Q8VBT1	Txlnb	5	5	23.4121	23.2906	0.2557	1.08784	1.08784	KO_1Way up vs WT_12mo	-1.07724	1.27479	0.121464	Txlnb	Txlnb	taxilin beta	Txlnb	378431	378431	10|10 A2	protein-coding	23.3514	23.2906	23.4121	+0.5σ	23.4976	23.341	23.2465	23.3529	23.0151	23.589	23.3868	23.3673	23.2358	23.4814
1373	681	Q9JKY7	Cyp2d22	5	5	20.0029	19.8646	0.256649	1.10062	1.10062	KO_1Way up vs WT_12mo	-1.08884	1.31897	0.138313	Cyp2d22	Cyp2d22	cytochrome P450, family 2, subfamily d, polypeptide 22	Cyp2d22	56448	56448	15|15 E1	protein-coding	19.9337	19.8646	20.0029	+0.5σ	19.751	19.991	19.8286	19.6785	20.074	19.9693	20.1219	19.6801	20.1154	20.1279
149	682	P10126	Eef1a1	5	5	26.0675	25.9647	0.256815	1.07389	1.07389	KO_1Way up vs WT_12mo	-1.06539	1.22866	0.102853	Eef1a1	Eef1a1	eukaryotic translation elongation factor 1 alpha 1	Eef1a1	13627	13627	9|9 E1	protein-coding	26.0161	25.9647	26.0675	+0.5σ	26.1038	25.8013	26.0376	25.8431	26.0376	25.9293	26.1424	25.9936	26.012	26.2603
1986	683	A2AWK6	Zic3	5	5	20.0515	19.8954	0.257516	1.11428	1.11428	KO_1Way up vs WT_12mo	-1.10127	1.36736	0.156109	Zic3	Zic3	zinc finger protein of the cerebellum 3	Zic3	22773	22773	X A6|X 32.56 cM	protein-coding	19.9734	19.8954	20.0515	+0.5σ	19.6894	20.2248	19.9317	19.9475	19.6833	20.0353	19.8546	20.2861	19.9109	20.1704
692	684	Q9ERS2	Ndufa13	5	5	25.1219	25.0583	0.258633	1.04507	1.04507	KO_1Way up vs WT_12mo	-1.04031	1.13619	0.0635998	Ndufa13	Ndufa13	NADH:ubiquinone oxidoreductase subunit A13	Ndufa13	67184	67184	8|8 B3.3	protein-coding	25.0901	25.0583	25.1219	+0.5σ	24.9054	25.1185	25.0534	25.0826	25.1314	25.0116	25.1376	25.2013	25.1676	25.0911
1059	685	Q9Z1Q5	Clic1	5	5	20.9263	20.7437	0.258671	1.13493	1.13493	KO_1Way up vs WT_12mo	-1.12016	1.44284	0.182603	Clic1	Clic1	chloride intracellular channel 1	Clic1	114584	114584	17 B1|17 18.58 cM	protein-coding	20.835	20.7437	20.9263	+0.5σ	20.7232	20.5283	20.7314	20.8353	20.9004	21.3736	20.7404	20.9264	20.5694	21.0217
253	686	J3QMG3	Vdac3	5	5	26.2721	26.1328	0.259337	1.10137	1.10137	KO_1Way up vs WT_12mo	-1.09072	1.32306	0.1393	Vdac3	Vdac3	voltage-dependent anion channel 3	Vdac3	22335	22335	8 A2|8 11.42 cM	protein-coding	26.2024	26.1328	26.2721	+0.5σ	26.0135	26.2319	26.1038	26.1825	26.1323	26.2603	26.6921	26.1673	26.1553	26.0855
1046	687	Q9CX86	Hnrnpa0	5	5	19.7931	19.6014	0.259544	1.14213	1.14213	KO_1Way up vs WT_12mo	-1.12709	1.47023	0.191721	Hnrnpa0	Hnrnpa0	heterogeneous nuclear ribonucleoprotein A0	Hnrnpa0	77134	77134	13|13 B1	protein-coding	19.6973	19.6014	19.7931	+1σ	19.2142	19.4697	19.8983	19.5308	19.8937	19.5813	19.6378	20.0721	19.8006	19.8736
558	688	Q8BWM0	Ptges2	5	5	21.1632	21.3306	0.260491	0.890426	-1.12306	KO_1Way down vs WT_12mo	-1.40084	1.11066	-0.167433	Ptges2	Ptges2	prostaglandin E synthase 2	Ptges2	96979	96979	2|2 B	protein-coding	21.2469	21.1632	21.3306	-0.5σ	21.0733	21.5095	21.0466	21.4039	21.6199	21.1436	21.1436	21.2999	21.3268	20.902
1912	689	Q8R472	Higd1a	5	5	18.2123	18.329	0.260818	0.922334	-1.08421	KO_1Way down vs WT_12mo	-1.26482	1.07598	-0.116639	Higd1a	Higd1a	HIG1 domain family, member 1A	Higd1a	56295	56295	9|9 F4	protein-coding	18.2706	18.2123	18.329	-0.5σ	18.1228	18.5566	18.1823	18.4819	18.3012	18.2664	18.0924	18.2727	18.1035	18.3266
1077	690	Q91V61	Sfxn3	5	5	16.7438	16.4755	0.26129	1.20441	1.20441	KO_1Way up vs WT_12mo	-1.18394	1.71741	0.268321	Sfxn3	Sfxn3	sideroflexin 3	Sfxn3	94280	94280	19|19 C3	protein-coding	16.6096	16.4755	16.7438	+1σ	16.1671	15.7989	16.7099	16.9787	16.7231	16.698	16.6585	16.698	16.9667	16.698
663	691	P67984	Rpl22	5	5	21.7065	21.7985	0.261853	0.938246	-1.06582	KO_1Way down vs WT_12mo	-1.20383	1.05974	-0.0919618	Rpl22	Rpl22	ribosomal protein L22	Rpl22	19934	19934	4|4 E2	protein-coding	21.7525	21.7065	21.7985	-0.5σ	21.9339	21.8111	21.831	21.868	21.5485	21.6876	21.5669	21.7585	21.7382	21.7816
941	692	P53702	Hccs	5	5	21.165	21.2697	0.262522	0.930021	-1.07524	KO_1Way down vs WT_12mo	-1.23534	1.06849	-0.104665	Hccs	Hccs	holocytochrome c synthetase	Hccs	15159	15159	X|X F5	protein-coding	21.2173	21.165	21.2697	-0.5σ	21.211	21.1765	21.0733	21.5435	21.3441	21.1548	21.2539	21.0622	21.1577	21.1964
272	693	Q61001	Lama5	5	5	22.4209	22.5259	0.262776	0.929788	-1.07551	KO_1Way down vs WT_12mo	-1.23634	1.06883	-0.105026	Lama5	Lama5	laminin, alpha 5	Lama5	16776	16776	2 H4|2 102.7 cM	protein-coding	22.4734	22.4209	22.5259	-0.5σ	22.8391	22.4045	22.3915	22.5053	22.4893	22.3424	22.4384	22.4656	22.3557	22.5026
299	694	O88569	Hnrnpa2b1	5	5	25.1311	25.0545	0.262989	1.05453	1.05453	KO_1Way up vs WT_12mo	-1.04979	1.16741	0.0766	Hnrnpa2b1	Hnrnpa2b1	heterogeneous nuclear ribonucleoprotein A2/B1	Hnrnpa2b1	53379	53379	6|6 B3	protein-coding	25.0928	25.0545	25.1311	+0.5σ	25.2634	25.0302	25.0302	24.9054	25.0434	25.1599	25.0418	25.1599	25.1899	25.1042
78	695	P17563	Selenbp1	5	5	27.819	27.7715	0.263256	1.03347	1.03347	KO_1Way up vs WT_12mo	-1.03063	1.10078	0.0475011	Selenbp1	Selenbp1	selenium binding protein 1	Selenbp1	20341	20341	3 F2.1|3 40.74 cM	protein-coding	27.7952	27.7715	27.819	+0.5σ	27.8182	27.6825	27.7665	27.7952	27.7952	27.8914	27.842	27.8175	27.7023	27.842
2024	696	D6RIK3	Tpmt	5	5	23.0155	22.897	0.26328	1.08559	1.08559	KO_1Way up vs WT_12mo	-1.07817	1.27064	0.118481	Tpmt	Tpmt	thiopurine methyltransferase	Tpmt	22017	22017	13 A5|13 24.5 cM	protein-coding	22.9563	22.897	23.0155	+0.5σ	23.0004	22.8301	22.9016	22.9552	22.7976	22.906	23.013	23.0226	22.7958	23.3398
1760	697	Q8R164	Bphl	5	5	19.1836	18.8906	0.263801	1.22511	1.22511	KO_1Way up vs WT_12mo	-1.20507	1.8087	0.292915	Bphl	Bphl	biphenyl hydrolase-like (serine hydrolase, breast epithelial mucin-associated antigen)	Bphl	68021	68021	13|13 A3.3	protein-coding	19.0371	18.8906	19.1836	+1σ	18.615	19.0745	19.5852	18.5766	18.6019	18.7521	19.5089	19.187	19.4763	18.9935
1194	698	M0QWP1	Agrn	5	5	17.4147	17.5392	0.263934	0.917339	-1.09011	KO_1Way down vs WT_12mo	-1.28644	1.08255	-0.124473	Agrn	Agrn	agrin	Agrn	11603	11603	4 E2|4 88.55 cM	protein-coding	17.4769	17.4147	17.5392	-0.5σ	17.6443	17.7485	17.261	17.6675	17.3746	17.4105	17.335	17.312	17.5556	17.4604
533	699	Q62167	Ddx3x	5	5	22.1014	21.9883	0.265379	1.08155	1.08155	KO_1Way up vs WT_12mo	-1.07526	1.25778	0.113095	Ddx3x	Ddx3x	DEAD box helicase 3, X-linked	Ddx3x	13205	13205	X A1.1|X 8.17 cM	protein-coding	22.0449	21.9883	22.1014	+0.5σ	22.2817	21.9896	21.9707	21.7919	21.9076	22.1501	22.2577	22.0104	22.0961	21.9927
568	700	P10518	Alad	5	5	20.8436	20.9853	0.265643	0.906456	-1.1032	KO_1Way down vs WT_12mo	-1.33302	1.09529	-0.141691	Alad	Alad	aminolevulinate, delta-, dehydratase	Alad	17025	17025	4 B3|4 33.17 cM	protein-coding	20.9144	20.8436	20.9853	-0.5σ	21.0602	20.7688	21.0081	21.0122	21.0769	20.6006	20.8665	20.6743	21.2029	20.8735
1804	701	Q69ZW3	Ehbp1	5	5	17.2409	17.0043	0.266982	1.17821	1.17821	KO_1Way up vs WT_12mo	-1.16527	1.61759	0.236593	Ehbp1	Ehbp1	EH domain binding protein 1	Ehbp1	216565	216565	11 A3.2|11 14.1 cM	protein-coding	17.1226	17.0043	17.2409	+1σ	17.5253	16.8082	16.8488	16.7554	17.084	16.7386	17.1554	17.4604	17.4893	17.3609
1559	702	P21812	Mcpt4	5	5	19.467	19.1518	0.2675	1.24422	1.24422	KO_1Way up vs WT_12mo	-1.22666	1.89898	0.315246	Mcpt4	Mcpt4	mast cell protease 4	Mcpt4	17227	17227	14 C3|14 28.19 cM	protein-coding	19.3094	19.1518	19.467	+1σ	18.9594	18.7184	19.6894	19.3326	19.0589	19.0649	18.9072	19.9063	19.5878	19.869
505	703	O88746	Tom1	5	5	20.2619	20.1102	0.26791	1.11089	1.11089	KO_1Way up vs WT_12mo	-1.10353	1.36184	0.151721	Tom1	Tom1	target of myb1 trafficking protein	Tom1	21968	21968	8|8 C1	protein-coding	20.1861	20.1102	20.2619	+0.5σ	19.7988	20.1485	20.2332	20.3086	20.062	20.1219	19.992	20.4234	20.4864	20.2861
1263	704	Q3UW66	Mpst	5	5	19.4625	19.3539	0.268587	1.0782	1.0782	KO_1Way up vs WT_12mo	-1.07331	1.24774	0.108621	Mpst	Mpst	mercaptopyruvate sulfurtransferase	Mpst	246221	246221	15|15 E1	protein-coding	19.4082	19.3539	19.4625	+0.5σ	19.2234	19.5308	19.2185	19.5735	19.2234	19.4243	19.521	19.4712	19.5699	19.3262
416	705	P53994	Rab2a	5	5	24.0445	23.9659	0.269839	1.056	1.056	KO_1Way up vs WT_12mo	-1.05286	1.17409	0.0786166	Rab2a	Rab2a	RAB2A, member RAS oncogene family	Rab2a	59021	59021	4|4 A1	protein-coding	24.0052	23.9659	24.0445	+0.5σ	23.9361	23.9238	23.8884	23.895	24.1861	24.0203	24.1778	23.989	23.9797	24.0557
1660	706	P62307	Snrpf	5	5	18.0739	18.2163	0.270173	0.905969	-1.10379	KO_1Way down vs WT_12mo	-1.33774	1.09799	-0.142467	Snrpf	Snrpf	small nuclear ribonucleoprotein polypeptide F	Snrpf	69878	69878	10|10 C2	protein-coding	18.1451	18.0739	18.2163	-0.5σ	18.3792	18.2654	18.0273	18.3416	18.0681	17.9526	17.9914	18.4557	18.0282	17.9414
429	707	Q9CQX8	Mrps36	5	5	23.552	23.6418	0.270387	0.939674	-1.0642	KO_1Way down vs WT_12mo	-1.2013	1.06073	-0.0897671	Mrps36	Mrps36	mitochondrial ribosomal protein S36	Mrps36	66128	66128	13|13 D1	protein-coding	23.5969	23.552	23.6418	-0.5σ	23.633	23.7982	23.633	23.633	23.5117	23.6479	23.6014	23.6479	23.5397	23.3232
1818	708	P01587	Csf2	5	5	16.3136	16.7547	0.270831	0.736582	-1.35762	KO_1Way down vs WT_12mo	-2.46398	1.33684	-0.441082	Csf2	Csf2	colony stimulating factor 2 (granulocyte-macrophage)	Csf2	12981	12981	11 B1.3|11 32.13 cM	protein-coding	16.5342	16.3136	16.7547	-2σ	17.3551	16.2568	16.5721	16.6777	16.9118	16.9375	16.7239	15.2111	16.756	15.9396
1083	709	Q3TJZ6	Fam98a	5	5	18.4583	18.5741	0.273748	0.922869	-1.08358	KO_1Way down vs WT_12mo	-1.26844	1.08031	-0.115803	Fam98a	Fam98a	family with sequence similarity 98, member A	Fam98a	72722	72722	17|17 E2	protein-coding	18.5162	18.4583	18.5741	-0.5σ	18.3629	18.6019	18.5169	18.7677	18.621	18.2866	18.3494	18.6872	18.5576	18.4105
1275	710	Q6P9R2	Oxsr1	5	5	19.6384	19.5205	0.274085	1.08516	1.08516	KO_1Way up vs WT_12mo	-1.08196	1.27408	0.117903	Oxsr1	Oxsr1	oxidative-stress responsive 1	Oxsr1	108737	108737	9|9 F3	protein-coding	19.5795	19.5205	19.6384	+0.5σ	19.383	19.5249	19.5467	19.4739	19.6739	19.6229	19.5699	19.5699	19.4547	19.9745
1724	711	Q9CRY7	Gdpd1	5	5	17.4487	17.6237	0.276714	0.885791	-1.12893	KO_1Way down vs WT_12mo	-1.43456	1.12559	-0.174961	Gdpd1	Gdpd1	glycerophosphodiester phosphodiesterase domain containing 1	Gdpd1	66569	66569	11|11 C	protein-coding	17.5362	17.4487	17.6237	-1σ	17.737	17.5025	17.8074	17.1892	17.8825	17.4196	17.3282	17.5386	17.71	17.2473
69	712	A0A0A0MQA3	Serpina1a	5	5	27.5866	27.4629	0.277109	1.0895	1.0895	KO_1Way up vs WT_12mo	-1.08739	1.29075	0.123673	Serpina1a	Serpina1a	serine (or cysteine) peptidase inhibitor, clade A, member 1A	Serpina1a	20700	20700	12 E|12 52.98 cM	protein-coding	27.5248	27.4629	27.5866	+0.5σ	27.623	27.3066	27.595	27.2395	27.5506	27.7944	27.566	27.3586	27.566	27.6481
1053	713	D3Z3G6	Mapk3	5	5	19.7225	19.9073	0.278605	0.87974	-1.1367	KO_1Way down vs WT_12mo	-1.4657	1.13437	-0.18485	Mapk3	Mapk3	mitogen-activated protein kinase 3	Mapk3	26417	26417	7 F3|7 69.25 cM	protein-coding	19.8149	19.7225	19.9073	-1σ	19.5993	19.8349	19.8349	20.01	20.2574	19.9008	19.4763	19.7151	20.0534	19.4667
1297	714	Q9D358	Acp1	5	5	20.9079	20.7844	0.278997	1.08939	1.08939	KO_1Way up vs WT_12mo	-1.08806	1.29129	0.123524	Acp1	Acp1	acid phosphatase 1, soluble	Acp1	11431	11431	12|12 A2	protein-coding	20.8462	20.7844	20.9079	+0.5σ	20.4838	20.7172	20.8353	20.8171	21.0686	20.7659	21.029	20.9632	20.9559	20.8257
1640	715	P62267	Rps23	5	5	20.6603	20.5346	0.279286	1.09105	1.09105	KO_1Way up vs WT_12mo	-1.08981	1.29729	0.125711	Rps23	Rps23	ribosomal protein S23	Rps23	66475	66475	13|13 C3	protein-coding	20.5974	20.5346	20.6603	+0.5σ	20.5283	20.4967	20.37	20.7015	20.5764	20.6743	20.8085	20.3821	20.9057	20.5308
1431	716	Q9WTQ5	Akap12	5	5	20.9242	21.2573	0.279948	0.793798	-1.25977	KO_1Way down vs WT_12mo	-1.99463	1.25685	-0.333156	Akap12	Akap12	A kinase (PRKA) anchor protein (gravin) 12	Akap12	83397	83397	10|10 A1	protein-coding	21.0907	20.9242	21.2573	-1σ	20.8678	21.3395	21.5986	21.2515	21.2293	21.3796	21.1919	21.4662	20.2452	20.3381
1066	717	P55292	Dsc2	5	5	18.2916	18.114	0.280024	1.13103	1.13103	KO_1Way up vs WT_12mo	-1.12968	1.44511	0.177633	Dsc2	Dsc2	desmocollin 2	Dsc2	13506	13506	18 A2|18 11.14 cM	protein-coding	18.2028	18.114	18.2916	+0.5σ	18.4634	17.9472	17.8195	18.2482	18.0917	18.4251	17.9847	18.5906	18.1755	18.2822
1028	718	Q9Z1Z2	Strap	5	5	20.1383	20.3173	0.280986	0.88331	-1.13211	KO_1Way down vs WT_12mo	-1.45	1.13135	-0.179008	Strap	Strap	serine/threonine kinase receptor associated protein	Strap	20901	20901	6|6 G1	protein-coding	20.2278	20.1383	20.3173	-1σ	20.2574	20.3368	20.4721	20.2064	20.314	20.3598	19.6756	19.9008	20.428	20.3273
984	719	Q9CQD1	Rab5a	5	5	22.5266	22.4448	0.281788	1.05835	1.05835	KO_1Way up vs WT_12mo	-1.05824	1.18533	0.0818136	Rab5a	Rab5a	RAB5A, member RAS oncogene family	Rab5a	271457	271457	17 C|17 27.82 cM	protein-coding	22.4857	22.4448	22.5266	+0.5σ	22.6004	22.4178	22.4078	22.4927	22.3051	22.37	22.5139	22.5103	22.6909	22.5477
1443	720	B1AX58	Pls3	5	5	19.3599	19.1985	0.282385	1.1183	1.1183	KO_1Way up vs WT_12mo	-1.11841	1.39869	0.161313	Pls3	Pls3	plastin 3 (T-isoform)	Pls3	102866	102866	X|X A7.3	protein-coding	19.2792	19.1985	19.3599	+0.5σ	19.1701	19.3793	19.2638	19.4001	18.7794	19.1365	19.2154	19.3897	19.5959	19.4617
48	721	B1AR69	Myh13	5	5	20.5834	20.3888	0.282528	1.14442	1.14442	KO_1Way up vs WT_12mo	-1.14465	1.49913	0.194613	Myh13	Myh13	myosin, heavy polypeptide 13, skeletal muscle	Myh13	544791	544791	11 B3|11 40.85 cM	protein-coding	20.4861	20.3888	20.5834	+1σ	20.1986	20.5179	20.8497	20.1636	20.2143	20.503	20.3171	20.4323	20.8324	20.8324
1603	722	Q9JM76	Arpc3	5	5	17.9595	18.3617	0.283225	0.756704	-1.32152	KO_1Way down vs WT_12mo	-2.3109	1.32322	-0.402199	Arpc3	Arpc3	actin related protein 2/3 complex, subunit 3	Arpc3	56378	56378	5|5 F	protein-coding	18.1606	17.9595	18.3617	-2σ	17.7335	18.598	18.4149	18.5943	18.4679	17.1415	18.827	18.1978	17.3649	18.2664
1729	723	P42703	Lifr	5	5	15.3028	15.0464	0.283953	1.19453	1.19453	KO_1Way up vs WT_12mo	-1.19621	1.70688	0.256447	Lifr	Lifr	LIF receptor alpha	Lifr	16880	16880	15 A1|15 3.46 cM	protein-coding	15.1746	15.0464	15.3028	+1σ	15.4702	15.3337	15.1628	14.6142	14.6509	15.6027	15.574	14.9993	14.9606	15.3775
250	724	Q9QXX4	Slc25a13	5	5	22.8302	22.7027	0.284169	1.09239	1.09239	KO_1Way up vs WT_12mo	-1.09325	1.30459	0.127488	Slc25a13	Slc25a13	solute carrier family 25 (mitochondrial carrier, adenine nucleotide translocator), member 13	Slc25a13	50799	50799	6|6 A1	protein-coding	22.7664	22.7027	22.8302	+0.5σ	22.6504	23.1094	22.6593	22.5296	22.565	22.7958	22.9542	22.7782	22.8737	22.749
1320	725	O35286	Dhx15	5	5	18.7667	18.5914	0.284334	1.12923	1.12923	KO_1Way up vs WT_12mo	-1.13055	1.44164	0.175344	Dhx15	Dhx15	DEAH (Asp-Glu-Ala-His) box polypeptide 15	Dhx15	13204	13204	5|5 C1	protein-coding	18.6791	18.5914	18.7667	+0.5σ	18.1126	18.7268	18.7184	18.4872	18.9119	18.6606	18.7018	18.7746	18.6739	19.0227
80	726	A0A1L1SQ51	Tln2	5	5	23.6535	23.6896	0.284952	0.975305	-1.02532	KO_1Way down vs WT_12mo	-1.07823	1.02564	-0.0360747	Tln2	Tln2	talin 2	Tln2	70549	70549	9|9 C	protein-coding	23.6715	23.6535	23.6896	-0.5σ	23.6825	23.6146	23.7307	23.6495	23.7706	23.7	23.6221	23.6221	23.6646	23.6586
1307	727	O08917	Flot1	5	5	19.4513	19.3449	0.28566	1.07655	1.07655	KO_1Way up vs WT_12mo	-1.07779	1.24911	0.106414	Flot1	Flot1	flotillin 1	Flot1	14251	14251	17|17 B1	protein-coding	19.3981	19.3449	19.4513	+0.5σ	19.4697	19.128	19.4653	19.3636	19.298	19.2289	19.3847	19.4617	19.6061	19.5754
1069	728	Q8BMS4	Coq3	5	5	19.9796	20.0802	0.286428	0.932654	-1.07221	KO_1Way down vs WT_12mo	-1.23428	1.07363	-0.100585	Coq3	Coq3	coenzyme Q3 methyltransferase	Coq3	230027	230027	4 A3|4 9.11 cM	protein-coding	20.0299	19.9796	20.0802	-0.5σ	20.136	20.2143	20.0009	20.0449	20.0049	20.1326	19.9745	20.0584	20.0471	19.6853
1363	729	Q8BJS4	Sun2	5	5	16.8191	17.2757	0.287371	0.728706	-1.37229	KO_1Way down vs WT_12mo	-2.60341	1.38245	-0.45659	Sun2	Sun2	Sad1 and UNC84 domain containing 2	Sun2	223697	223697	15|15 E1	protein-coding	17.0474	16.8191	17.2757	-2σ	18.215	17.4711	17.1203	16.3033	17.2687	17.1096	17.5766	16.2233	16.9124	16.2737
844	730	Q8R1I1	Uqcr10	5	5	24.5258	24.4555	0.287543	1.04994	1.04994	KO_1Way up vs WT_12mo	-1.05117	1.15878	0.070304	Uqcr10	Uqcr10	ubiquinol-cytochrome c reductase, complex III subunit X	Uqcr10	66152	66152	11|11 A1	protein-coding	24.4906	24.4555	24.5258	+0.5σ	24.4507	24.6535	24.4428	24.3931	24.3373	24.5844	24.5404	24.4587	24.596	24.4495
1418	731	Q8BH58	Tiprl	5	5	17.3461	17.6266	0.288954	0.823318	-1.2146	KO_1Way down vs WT_12mo	-1.80247	1.22181	-0.280478	Tiprl	Tiprl	TIP41, TOR signalling pathway regulator-like (S. cerevisiae)	Tiprl	226591	226591	1|1 H2.2	protein-coding	17.4864	17.3461	17.6266	-1σ	17.7778	17.8237	17.717	17.2204	17.5941	17.8284	17.5134	17.6683	16.5888	17.1316
631	732	Q20BD0	Hnrnpab	5	5	20.5996	20.8342	0.290631	0.849892	-1.17662	KO_1Way down vs WT_12mo	-1.63907	1.18392	-0.234648	Hnrnpab	Hnrnpab	heterogeneous nuclear ribonucleoprotein A/B	Hnrnpab	15384	15384	11|11 B1.3	protein-coding	20.7169	20.5996	20.8342	-1σ	21.5818	20.7743	20.5231	20.6486	20.6434	20.6039	20.8633	20.428	20.4366	20.6662
82	733	A0A0J9YKD4	Ckm	5	5	19.7776	19.6371	0.291398	1.10228	1.10228	KO_1Way up vs WT_12mo	-1.10675	1.34471	0.140487	Ckm	Ckm	creatine kinase, muscle	Ckm	12715	12715	7 A3|7 9.67 cM	protein-coding	19.7074	19.6371	19.7776	+0.5σ	19.5376	19.4274	19.8718	19.6136	19.7353	20.1384	19.5754	19.7891	19.7406	19.6446
1127	734	Q9D1Q6	Erp44	5	5	20.0282	19.7712	0.292166	1.19499	1.19499	KO_1Way up vs WT_12mo	-1.20461	1.72019	0.256997	Erp44	Erp44	endoplasmic reticulum protein 44	Erp44	76299	76299	4|4 B1	protein-coding	19.8997	19.7712	20.0282	+1σ	19.9726	19.2058	19.7353	19.9182	20.0242	19.5089	20.4163	20.4042	19.9008	19.9109
1039	735	Q70IV5	Synm	5	5	18.1536	18.3588	0.292973	0.867404	-1.15286	KO_1Way down vs WT_12mo	-1.54293	1.16088	-0.205224	Synm	Synm	synemin, intermediate filament protein	Synm	233335	233335	7|7 C	protein-coding	18.2562	18.1536	18.3588	-1σ	18.3111	17.9301	18.4295	18.621	18.5023	18.1831	18.0342	17.7884	18.1238	18.6384
1488	736	A0A0R4J263	Agpat1	5	5	15.646	15.8626	0.293925	0.860593	-1.16199	KO_1Way down vs WT_12mo	-1.58149	1.17128	-0.216597	Agpat1	Agpat1	1-acylglycerol-3-phosphate O-acyltransferase 1 (lysophosphatidic acid acyltransferase, alpha)	Agpat1	55979	55979	17 B1|17 18.18 cM	protein-coding	15.7543	15.646	15.8626	-1σ	15.657	16.1302	15.9543	15.6836	15.8878	15.8885	15.6027	15.9396	14.9993	15.7998
436	737	P20918	Plg	5	5	22.2827	22.1982	0.294274	1.0603	1.0603	KO_1Way up vs WT_12mo	-1.0637	1.19585	0.0844724	Plg	Plg	plasminogen	Plg	18815	18815	17 A1|17 8.5 cM	protein-coding	22.2404	22.1982	22.2827	+0.5σ	22.0911	22.2148	22.3402	22.2745	22.0707	22.2577	22.2493	22.192	22.4955	22.2191
452	738	P63330	Ppp2ca	5	5	22.9284	22.8308	0.294676	1.06996	1.06996	KO_1Way up vs WT_12mo	-1.07406	1.2296	0.0975596	Ppp2ca	Ppp2ca	protein phosphatase 2 (formerly 2A), catalytic subunit, alpha isoform	Ppp2ca	19052	19052	11|11 B1.3	protein-coding	22.8796	22.8308	22.9284	+0.5σ	22.5792	22.9503	22.8687	22.8238	22.9321	22.9769	22.8013	22.8323	23.1134	22.9179
209	739	Q9JJW5	Myoz2	5	5	25.8142	25.8453	0.294959	0.978621	-1.02185	KO_1Way down vs WT_12mo	-1.06831	1.02312	-0.0311775	Myoz2	Myoz2	myozenin 2	Myoz2	59006	59006	3|3 G1	protein-coding	25.8298	25.8142	25.8453	-0.5σ	25.8981	25.8839	25.8217	25.8013	25.8217	25.7834	25.8689	25.8207	25.7559	25.8418
766	740	P97822	Anp32e	5	5	19.3588	19.1544	0.295209	1.15224	1.15224	KO_1Way up vs WT_12mo	-1.1619	1.5426	0.204437	Anp32e	Anp32e	acidic (leucine-rich) nuclear phosphoprotein 32 family, member E	Anp32e	66471	66471	3|3 F2.1	protein-coding	19.2566	19.1544	19.3588	+1σ	18.9119	19.1991	19.3793	19.5595	18.7223	19.1813	19.2911	19.1426	19.6756	19.5036
1859	741	P28481	Col2a1	5	5	24.3111	24.4197	0.295385	0.927478	-1.07819	KO_1Way down vs WT_12mo	-1.25905	1.08305	-0.108614	Col2a1	Col2a1	collagen, type II, alpha 1	Col2a1	12824	12824	15 F1|15 53.97 cM	protein-coding	24.3654	24.3111	24.4197	-0.5σ	24.2633	24.3777	24.4604	24.6195	24.3777	24.0359	24.4201	24.2619	24.4709	24.3669
2029	742	A0A1W2P7A1	Rps12	5	5	18.672	19.1868	0.296056	0.699851	-1.42888	KO_1Way down vs WT_12mo	-2.98345	1.46127	-0.51488	Rps12	Rps12	ribosomal protein S12	Rps12	20042	20042	10|10 A4	protein-coding	18.9294	18.672	19.1868	-2σ	19.2565	19.4185	18.8826	19.2793	19.0972	18.9416	18.9167	19.4116	16.9028	19.187
620	743	Q91WS0	Cisd1	5	5	25.1729	25.2591	0.29634	0.941972	-1.0616	KO_1Way down vs WT_12mo	-1.20102	1.06568	-0.0862445	Cisd1	Cisd1	CDGSH iron sulfur domain 1	Cisd1	52637	52637	10 B5.3|10 36.88 cM	protein-coding	25.216	25.1729	25.2591	-0.5σ	25.3443	25.4499	25.2985	25.1314	25.0715	25.1498	25.2714	25.224	25.0814	25.1376
1125	744	O89053	Coro1a	5	5	18.8132	18.6603	0.296621	1.11181	1.11181	KO_1Way up vs WT_12mo	-1.11954	1.38387	0.152904	Coro1a	Coro1a	coronin, actin binding protein 1A	Coro1a	12721	12721	7 69.25 cM|7 F3	protein-coding	18.7368	18.6603	18.8132	+0.5σ	18.5806	18.6487	18.5894	19.0589	18.424	18.8033	18.9214	18.5813	18.6872	19.0729
475	745	P62874	Gnb1	5	5	24.1689	24.1373	0.296642	1.02213	1.02213	KO_1Way up vs WT_12mo	-1.0236	1.0694	0.0315799	Gnb1	Gnb1	guanine nucleotide binding protein (G protein), beta 1	Gnb1	14688	14688	4 E2|4 86.17 cM	protein-coding	24.1531	24.1373	24.1689	+0.5σ	24.21	24.0822	24.1514	24.1514	24.0915	24.1398	24.1605	24.1778	24.1398	24.2266
2026	746	Q6ZPJ3	Ube2o	5	5	16.1772	16.0278	0.296804	1.10912	1.10912	KO_1Way up vs WT_12mo	-1.11675	1.37376	0.149412	Ube2o	Ube2o	ubiquitin-conjugating enzyme E2O	Ube2o	217342	217342	11|11 E2	protein-coding	16.1025	16.0278	16.1772	+0.5σ	16.3365	15.9861	15.97	15.6021	16.2444	16.2046	16.1814	16.1153	16.0809	16.3039
935	747	Q99L47	St13	5	5	20.9507	20.7113	0.297162	1.18053	1.18053	KO_1Way up vs WT_12mo	-1.1939	1.66388	0.239432	St13	St13	suppression of tumorigenicity 13	St13	70356	70356	15|15 E1	protein-coding	20.831	20.7113	20.9507	+1σ	20.7816	20.1636	21.0769	21.1413	20.3927	21.2323	21.0144	20.9466	20.9466	20.6136
681	748	P28271	Aco1	5	5	20.8606	20.7469	0.298323	1.08198	1.08198	KO_1Way up vs WT_12mo	-1.08824	1.27399	0.113675	Aco1	Aco1	aconitase 1	Aco1	11428	11428	4 A5|4 20.24 cM	protein-coding	20.8038	20.7469	20.8606	+0.5σ	20.6924	20.6721	20.8678	20.5056	20.9967	20.9604	20.8145	20.7477	21.029	20.7514
1992	749	P35585	Ap1m1	5	5	17.7584	17.9047	0.298939	0.903589	-1.1067	KO_1Way down vs WT_12mo	-1.36596	1.11527	-0.146262	Ap1m1	Ap1m1	adaptor-related protein complex AP-1, mu subunit 1	Ap1m1	11767	11767	8 B3.3|8 34.92 cM	protein-coding	17.8316	17.7584	17.9047	-0.5σ	17.7824	18.0036	17.9838	17.8959	17.8576	17.7239	18.1035	17.8402	17.7961	17.3282
1232	750	Q9QUM9	Psma6	5	5	20.4146	20.4971	0.299136	0.944428	-1.05884	KO_1Way down vs WT_12mo	-1.19235	1.06351	-0.0824874	Psma6	Psma6	proteasome subunit alpha 6	Psma6	26443	26443	12|12 C1	protein-coding	20.4559	20.4146	20.4971	-0.5σ	20.5506	20.3978	20.6119	20.4626	20.4626	20.2861	20.428	20.3522	20.6546	20.3522
1991	751	Q9R1P3	Psmb2	5	5	19.277	19.139	0.299718	1.10043	1.10043	KO_1Way up vs WT_12mo	-1.10885	1.34275	0.138063	Psmb2	Psmb2	proteasome (prosome, macropain) subunit, beta type 2	Psmb2	26445	26445	4 D2.2|4 60.9 cM	protein-coding	19.208	19.139	19.277	+0.5σ	19.0589	18.9199	19.375	19.0279	19.3131	19.271	19.2249	18.9832	19.5089	19.3972
104	752	Q8QZT1	Acat1	5	5	26.892	26.9477	0.299781	0.962179	-1.03931	KO_1Way down vs WT_12mo	-1.12609	1.04252	-0.055623	Acat1	Acat1	acetyl-Coenzyme A acetyltransferase 1	Acat1	110446	110446	9 A5.3|9 29.12 cM	protein-coding	26.9199	26.892	26.9477	-0.5σ	26.8188	26.9582	27.0084	27.0403	26.9127	26.856	26.8179	26.939	26.856	26.9913
1242	753	Q9CPX8	Uqcr11	5	5	22.6649	22.5808	0.301775	1.06003	1.06003	KO_1Way up vs WT_12mo	-1.06555	1.19732	0.0841025	Uqcr11	Uqcr11	ubiquinol-cytochrome c reductase, complex III subunit XI	Uqcr11	66594	66594	10|10 C1	protein-coding	22.6228	22.5808	22.6649	+0.5σ	22.4489	22.5924	22.5542	22.6926	22.6157	22.6566	22.7248	22.4301	22.822	22.6909
1651	754	Q8K248	Hpdl	5	5	21.3433	21.2727	0.30193	1.05015	1.05015	KO_1Way up vs WT_12mo	-1.05478	1.16323	0.0705973	Hpdl	Hpdl	4-hydroxyphenylpyruvate dioxygenase-like	Hpdl	242642	242642	4|4 D1	protein-coding	21.308	21.2727	21.3433	+0.5σ	21.2553	21.3481	21.2682	21.3106	21.1815	21.3034	21.3311	21.2958	21.2242	21.5622
98	755	P97467	Pam	5	5	26.8209	26.6365	0.303125	1.13631	1.13631	KO_1Way up vs WT_12mo	-1.15025	1.48519	0.184351	Pam	Pam	peptidylglycine alpha-amidating monooxygenase	Pam	18484	18484	1 D|1 47.76 cM	protein-coding	26.7287	26.6365	26.8209	+0.5σ	27.0533	26.2801	26.3827	26.5995	26.8671	26.9257	26.9257	26.9913	26.5351	26.7267
469	756	Q9D1H9	Mfap4	5	5	22.9507	22.8413	0.303624	1.07875	1.07875	KO_1Way up vs WT_12mo	-1.08678	1.26469	0.109364	Mfap4	Mfap4	microfibrillar-associated protein 4	Mfap4	76293	76293	11 B2|11 37.96 cM	protein-coding	22.896	22.8413	22.9507	+0.5σ	22.7737	22.6296	22.9426	22.9919	22.8687	22.6983	23.176	22.9542	22.9708	22.9542
1325	757	P52196	Tst	5	5	20.5016	20.2599	0.303719	1.18239	1.18239	KO_1Way up vs WT_12mo	-1.202	1.68044	0.241702	Tst	Tst	thiosulfate sulfurtransferase, mitochondrial	Tst	22117	22117	15 E1|15 37.47 cM	protein-coding	20.3807	20.2599	20.5016	+1σ	20.062	20.2574	20.3638	20.3887	20.2275	20.878	20.2696	21.1216	20.0022	20.2364
980	758	E9PY39	Gm20431	5	5	21.481	21.5944	0.304888	0.924412	-1.08177	KO_1Way down vs WT_12mo	-1.27626	1.09062	-0.113392	---	Gm20431	---	---	---	---	---	---	21.5377	21.481	21.5944	-0.5σ	21.837	21.3823	21.7653	21.4477	21.5397	21.3945	21.4813	21.5838	21.6109	21.3345
544	759	Q8BLF1	Nceh1	5	5	22.2002	22.1413	0.304973	1.04168	1.04168	KO_1Way up vs WT_12mo	-1.04611	1.13513	0.0589096	Nceh1	Nceh1	neutral cholesterol ester hydrolase 1	Nceh1	320024	320024	3|3 A3	protein-coding	22.1708	22.1413	22.2002	+0.5σ	22.2148	22.1888	22.1414	22.1414	22.0201	22.0791	22.3339	22.1715	22.1773	22.2393
831	760	A2AMM0	Cavin4	5	5	21.7664	21.6947	0.305545	1.05097	1.05097	KO_1Way up vs WT_12mo	-1.05655	1.16699	0.0717151	Cavin4	Cavin4	caveolae associated 4	Cavin4	68016	68016	4|4 B1	protein-coding	21.7306	21.6947	21.7664	+0.5σ	21.7061	21.5397	21.7612	21.6419	21.8245	21.7638	21.7673	21.7638	21.6313	21.9057
694	761	P62835	Rap1a	5	5	22.3475	22.417	0.305834	0.952949	-1.04937	KO_1Way down vs WT_12mo	-1.16159	1.05485	-0.0695294	Rap1a	Rap1a	RAS-related protein 1a	Rap1a	109905	109905	3 F2.2|3 46.45 cM	protein-coding	22.3822	22.3475	22.417	-0.5σ	22.4045	22.3402	22.5353	22.4265	22.3785	22.3087	22.4301	22.3389	22.1715	22.4882
1010	762	Q9D023	Mpc2	5	5	23.939	23.9916	0.306167	0.964225	-1.0371	KO_1Way down vs WT_12mo	-1.11995	1.04125	-0.0525587	Mpc2	Mpc2	mitochondrial pyruvate carrier 2	Mpc2	70456	70456	1|1 H2.3	protein-coding	23.9653	23.939	23.9916	-0.5σ	24.0376	24.0641	23.9033	24.0292	23.9238	23.9011	24.0203	23.8872	24.0278	23.8587
332	763	P23927	Cryab	5	5	26.8081	26.7503	0.307907	1.04085	1.04085	KO_1Way up vs WT_12mo	-1.04577	1.13295	0.0577629	Cryab	Cryab	crystallin, alpha B	Cryab	12955	12955	9 A5.3|9 27.75 cM	protein-coding	26.7792	26.7503	26.8081	+0.5σ	26.8032	26.8309	26.7865	26.6656	26.6656	26.6767	26.8022	26.8179	26.8179	26.9257
575	764	Q9CQ91	Ndufa3	5	5	23.0178	22.8971	0.307915	1.08727	1.08727	KO_1Way up vs WT_12mo	-1.09803	1.29803	0.120705	Ndufa3	Ndufa3	NADH:ubiquinone oxidoreductase subunit A3	Ndufa3	66091	66091	7|7 A1	protein-coding	22.9575	22.8971	23.0178	+0.5σ	22.6354	23.0078	23.1178	22.8335	22.8911	22.8532	22.8737	23.1645	23.2208	22.9769
1514	765	A0A140T8M7	Rpl23a-ps3	5	5	20.5495	21.5935	0.308549	0.484985	-2.06192	KO_1Way down vs WT_12mo	-9.56662	2.25017	-1.04399	Rpl23a-ps3	Rpl23a-ps3	ribosomal protein L23A, pseudogene 3	Rpl23a-ps3	100041163	100041163	14 B|14	pseudo	21.0715	20.5495	21.5935	-3σ	21.7543	21.4177	21.4731	21.7687	21.5535	21.4391	21.399	21.6541	16.7239	21.5314
614	766	E9Q3X0	Mvp	5	5	20.2574	20.1546	0.309555	1.07383	1.07383	KO_1Way up vs WT_12mo	-1.08347	1.24936	0.102766	Mvp	Mvp	major vault protein	Mvp	78388	78388	7|7 F3	protein-coding	20.206	20.1546	20.2574	+0.5σ	20.294	20.1081	20.294	19.9317	20.1453	20.2522	20.2218	20.0307	20.3821	20.4001
1016	767	P63005	Pafah1b1	5	5	20.6587	20.5621	0.309861	1.06929	1.06929	KO_1Way up vs WT_12mo	-1.07842	1.23303	0.0966493	Pafah1b1	Pafah1b1	platelet-activating factor acetylhydrolase, isoform 1b, subunit 1	Pafah1b1	18472	18472	11 B5|11 45.76 cM	protein-coding	20.6104	20.5621	20.6587	+0.5σ	20.697	20.6027	20.5056	20.6572	20.3479	20.6899	20.493	20.8195	20.5308	20.7603
1092	768	Q6P542	Abcf1	5	5	14.9051	14.6456	0.311734	1.19703	1.19703	KO_1Way up vs WT_12mo	-1.22661	1.7576	0.259465	Abcf1	Abcf1	ATP-binding cassette, sub-family F (GCN20), member 1	Abcf1	224742	224742	17 B1|17 18.8 cM	protein-coding	14.7753	14.6456	14.9051	+1σ	14.7717	14.8048	14.9012	14.019	14.7315	15.2766	14.5701	14.9019	15.3343	14.4426
1566	769	Q8R3B1	Plcd1	5	5	16.6097	16.0795	0.312226	1.44408	1.44408	KO_1Way up vs WT_12mo	-1.51922	3.16813	0.530151	Plcd1	Plcd1	phospholipase C, delta 1	Plcd1	18799	18799	9|9 F3	protein-coding	16.3446	16.0795	16.6097	+2σ	15.737	15.0783	16.454	16.5721	16.5563	16.5111	15.3038	16.9667	16.5373	17.7296
1440	770	O89023	Tpp1	5	5	20.324	20.1628	0.312373	1.11823	1.11823	KO_1Way up vs WT_12mo	-1.1357	1.42012	0.161217	Tpp1	Tpp1	tripeptidyl peptidase I	Tpp1	12751	12751	7 E3|7 55.97 cM	protein-coding	20.2434	20.1628	20.324	+0.5σ	20.0836	20.1684	20.2615	19.9637	20.3368	20.1499	20.4807	19.8812	20.6006	20.5077
181	771	Q9D2G2	Dlst	5	5	26.353	26.3913	0.312527	0.973805	-1.0269	KO_1Way down vs WT_12mo	-1.08691	1.03071	-0.0382957	Dlst	Dlst	dihydrolipoamide S-succinyltransferase (E2 component of 2-oxo-glutarate complex)	Dlst	78920	78920	12|12 D1	protein-coding	26.3722	26.353	26.3913	-0.5σ	26.3134	26.4177	26.4395	26.4177	26.3685	26.4388	26.3676	26.3676	26.3126	26.2787
398	772	Q9CR68	Uqcrfs1	5	5	23.9644	23.9012	0.313546	1.04477	1.04477	KO_1Way up vs WT_12mo	-1.05139	1.14764	0.0631841	Uqcrfs1	Uqcrfs1	ubiquinol-cytochrome c reductase, Rieske iron-sulfur polypeptide 1	Uqcrfs1	66694	66694	13|13 A3.2	protein-coding	23.9328	23.9012	23.9644	+0.5σ	23.8135	23.8456	23.895	23.9988	23.9534	24.0278	23.855	23.952	24.1122	23.8751
141	773	P14152	Mdh1	5	5	29.2249	29.2622	0.314018	0.974512	-1.02615	KO_1Way down vs WT_12mo	-1.08463	1.03004	-0.0372482	Mdh1	Mdh1	malate dehydrogenase 1, NAD (soluble)	Mdh1	17449	17449	11 A3.1|11 13.89 cM	protein-coding	29.2435	29.2249	29.2622	-0.5σ	29.2622	29.2622	29.2622	29.2622	29.2622	29.2596	29.0862	29.2596	29.2596	29.2596
756	774	Q9DC77	Smpx	5	5	21.9965	21.8915	0.314561	1.07552	1.07552	KO_1Way up vs WT_12mo	-1.08726	1.25768	0.105034	Smpx	Smpx	small muscle protein, X-linked	Smpx	66106	66106	X|X F4	protein-coding	21.944	21.8915	21.9965	+0.5σ	21.5681	22.0201	21.8416	21.9435	22.084	22.0827	22.0178	22.0527	21.9583	21.8709
499	775	Q8R2G4	Art3	5	5	22.5527	22.6448	0.315127	0.938159	-1.06592	KO_1Way down vs WT_12mo	-1.22287	1.07629	-0.0920961	Art3	Art3	ADP-ribosyltransferase 3	Art3	109979	109979	5 E2|5 46.54 cM	protein-coding	22.5987	22.5527	22.6448	-0.5σ	22.847	22.8035	22.5151	22.5231	22.5353	22.6222	22.4706	22.4257	22.6057	22.6394
948	776	Q3TLP5	Echdc2	5	5	20.9246	20.7417	0.3162	1.13519	1.13519	KO_1Way up vs WT_12mo	-1.158	1.49227	0.182937	Echdc2	Echdc2	enoyl Coenzyme A hydratase domain containing 2	Echdc2	52430	52430	4 C7|4 50.3 cM	protein-coding	20.8331	20.7417	20.9246	+0.5σ	20.2778	20.605	20.8713	21.0166	20.9377	20.8471	20.7477	21.3379	20.8525	20.8379
1664	777	P17665	Cox7c	5	5	23.192	23.3187	0.317286	0.915901	-1.09182	KO_1Way down vs WT_12mo	-1.32019	1.10747	-0.126737	Cox7c	Cox7c	cytochrome c oxidase subunit 7C	Cox7c	12867	12867	13|13 C3	protein-coding	23.2553	23.192	23.3187	-0.5σ	23.096	23.4283	23.3629	23.5919	23.1146	23.2712	23.0226	23.0591	23.1917	23.4155
600	778	P14094	Atp1b1	5	5	23.4523	23.5097	0.317606	0.961005	-1.04058	KO_1Way down vs WT_12mo	-1.13409	1.04737	-0.0573838	Atp1b1	Atp1b1	ATPase, Na+/K+ transporting, beta 1 polypeptide	Atp1b1	11931	11931	1 H2.2|1 71.75 cM	protein-coding	23.481	23.4523	23.5097	-0.5σ	23.4338	23.5774	23.5036	23.4417	23.5919	23.3477	23.4461	23.3994	23.6014	23.4669
613	779	P51150	Rab7	5	5	22.4776	22.4222	0.317723	1.03915	1.03915	KO_1Way up vs WT_12mo	-1.04572	1.12919	0.0554004	Rab7	Rab7	RAB7, member RAS oncogene family	Rab7	19349	19349	6 D1|6 39.13 cM	protein-coding	22.4499	22.4222	22.4776	+0.5σ	22.2588	22.4439	22.4927	22.4614	22.4543	22.5277	22.4472	22.41	22.4301	22.573
1337	780	Q9D0S9	Hint2	5	5	18.4706	18.3255	0.319275	1.10583	1.10583	KO_1Way up vs WT_12mo	-1.12508	1.37582	0.14513	Hint2	Hint2	histidine triad nucleotide binding protein 2	Hint2	68917	68917	4|4 A5	protein-coding	18.3981	18.3255	18.4706	+0.5σ	18.2914	18.2858	18.3457	18.3524	18.3524	18.5179	18.5688	18.3319	18.8783	18.0563
1430	781	P03930	ATP8	5	5	21.9917	22.1111	0.319339	0.920532	-1.08633	KO_1Way down vs WT_12mo	-1.30036	1.1019	-0.11946	ATP8	ATP8	ATP synthase F0 subunit 8	mt-Atp8	17706	17706	-	protein-coding	22.0514	21.9917	22.1111	-0.5σ	22.1414	22.3785	22.117	22.209	21.7097	21.9583	21.9877	21.9319	22.0568	22.0236
1070	782	Q8R1Q8	Dync1li1	5	5	18.6618	18.489	0.319967	1.12727	1.12727	KO_1Way up vs WT_12mo	-1.15113	1.46279	0.172833	Dync1li1	Dync1li1	dynein cytoplasmic 1 light intermediate chain 1	Dync1li1	235661	235661	9|9 F3	protein-coding	18.5754	18.489	18.6618	+0.5σ	18.3314	18.6729	18.6641	18.5615	18.215	18.2925	18.7561	18.4072	19.0023	18.8509
1988	783	Q9QZ41	Dbf4	5	5	19.6142	19.7956	0.320839	0.881867	-1.13396	KO_1Way down vs WT_12mo	-1.4913	1.15977	-0.181368	Dbf4	Dbf4	DBF4 zinc finger	Dbf4	27214	27214	5|5 A1	protein-coding	19.7049	19.6142	19.7956	-1σ	19.8937	19.5376	19.9182	19.8416	19.7866	19.9499	19.5444	19.6918	19.0478	19.837
483	784	Q91ZA3	Pcca	5	5	23.3893	23.3431	0.321334	1.03253	1.03253	KO_1Way up vs WT_12mo	-1.03854	1.10719	0.0461769	Pcca	Pcca	propionyl-Coenzyme A carboxylase, alpha polypeptide	Pcca	110821	110821	14 E5|14 65.99 cM	protein-coding	23.3662	23.3431	23.3893	+0.5σ	23.3106	23.447	23.3735	23.3312	23.2531	23.4155	23.3477	23.4588	23.4272	23.2973
1762	785	G5E866	Sf3b1	5	5	16.2194	16.117	0.321588	1.07354	1.07354	KO_1Way up vs WT_12mo	-1.08755	1.25339	0.102379	Sf3b1	Sf3b1	splicing factor 3b, subunit 1	Sf3b1	81898	81898	1 C1.2|1 27.98 cM	protein-coding	16.1682	16.117	16.2194	+0.5σ	15.97	16.3512	16.0391	16.0024	16.2226	16.3186	16.3707	16.0031	16.2233	16.1814
1382	786	P61014	Pln	5	5	24.5267	24.7261	0.322043	0.870951	-1.14817	KO_1Way down vs WT_12mo	-1.55278	1.17787	-0.199336	Pln	Pln	phospholamban	Pln	18821	18821	10|10 B3	protein-coding	24.6264	24.5267	24.7261	-1σ	24.7779	25.4042	24.3777	24.5977	24.4729	24.4587	24.6296	24.5404	24.6296	24.3752
71	787	Q64727	Vcl	5	5	26.637	26.6646	0.322189	0.981005	-1.01936	KO_1Way down vs WT_12mo	-1.06299	1.023	-0.027667	Vcl	Vcl	vinculin	Vcl	22330	22330	14 A3|14 11.53 cM	protein-coding	26.6508	26.637	26.6646	-0.5σ	26.6777	26.708	26.6201	26.6396	26.6777	26.6383	26.6639	26.6639	26.5548	26.6639
814	788	P85094	Isoc2a	5	5	19.0477	19.2932	0.322534	0.843479	-1.18557	KO_1Way down vs WT_12mo	-1.72034	1.22395	-0.245575	Isoc2a	Isoc2a	isochorismatase domain containing 2a	Isoc2a	664994	664994	7|7 A1	protein-coding	19.1704	19.0477	19.2932	-1σ	19.3326	19.6417	19.0719	19.0014	19.4185	18.7746	19.7082	18.5531	18.9416	19.2609
294	789	Q62417	Sorbs1	5	5	23.2612	23.3218	0.323149	0.958895	-1.04287	KO_1Way down vs WT_12mo	-1.14328	1.05122	-0.0605554	Sorbs1	Sorbs1	sorbin and SH3 domain containing 1	Sorbs1	20411	20411	19 C3|19 34.25 cM	protein-coding	23.2915	23.2612	23.3218	-0.5σ	23.2597	23.2531	23.4013	23.2531	23.4417	23.2648	23.2856	23.2856	23.3566	23.1134
1667	790	Q99NF7	Ppm1b	5	5	18.4468	18.2959	0.324656	1.11024	1.11024	KO_1Way up vs WT_12mo	-1.1334	1.39706	0.15087	Ppm1b	Ppm1b	protein phosphatase 1B, magnesium dependent, beta isoform	Ppm1b	19043	19043	17 E4|17 55.13 cM	protein-coding	18.3713	18.2959	18.4468	+0.5σ	18.2973	18.5123	18.1749	18.4507	18.0444	18.1341	18.5732	18.6977	18.6218	18.2072
513	791	O88844	Idh1	5	5	22.9297	22.8474	0.325725	1.05867	1.05867	KO_1Way up vs WT_12mo	-1.07097	1.20033	0.0822548	Idh1	Idh1	isocitrate dehydrogenase 1 (NADP+), soluble	Idh1	15926	15926	1 C2- C3|1 32.91 cM	protein-coding	22.8885	22.8474	22.9297	+0.5σ	22.7003	23.0004	22.7976	22.7737	22.965	22.8823	22.9582	22.749	23.0528	23.006
12	792	Q14BI5	Myom2	5	5	28.3699	28.3224	0.326211	1.03341	1.03341	KO_1Way up vs WT_12mo	-1.0404	1.11108	0.0474139	Myom2	Myom2	myomesin 2	Myom2	17930	17930	8|8 A1.1	protein-coding	28.3462	28.3224	28.3699	+0.5σ	28.227	28.432	28.3997	28.2768	28.2768	28.3058	28.4311	28.3992	28.3365	28.3767
1319	793	Q62465	Vat1	5	5	19.1736	19.2861	0.327007	0.925031	-1.08105	KO_1Way down vs WT_12mo	-1.2841	1.09878	-0.112427	Vat1	Vat1	vesicle amine transport 1	Vat1	26949	26949	11|11 D	protein-coding	19.2298	19.1736	19.2861	-0.5σ	19.089	19.1458	19.4382	19.2638	19.4935	19.3805	19.2952	19.012	19.0227	19.1579
345	794	Q8VEK3	Hnrnpu	5	5	23.5043	23.4432	0.327283	1.04326	1.04326	KO_1Way up vs WT_12mo	-1.05259	1.14563	0.0611007	Hnrnpu	Hnrnpu	heterogeneous nuclear ribonucleoprotein U	Hnrnpu	51810	51810	1|1 H4	protein-coding	23.4737	23.4432	23.5043	+0.5σ	23.447	23.4893	23.4095	23.2926	23.5774	23.5272	23.549	23.5171	23.3673	23.5606
792	795	P43277	H1f3	5	5	24.3901	24.3435	0.328237	1.03282	1.03282	KO_1Way up vs WT_12mo	-1.04001	1.10939	0.0465857	H1f3	H1f3	H1.3 linker histone, cluster member	H1f3	14957	14957	13|13 A3.1	protein-coding	24.3668	24.3435	24.3901	+0.5σ	24.3373	24.3066	24.359	24.4211	24.2937	24.4495	24.27	24.4138	24.3356	24.4818
610	796	Q99JR5	Tinagl1	5	5	20.1017	20.2078	0.328364	0.929051	-1.07637	KO_1Way down vs WT_12mo	-1.26697	1.09357	-0.10617	Tinagl1	Tinagl1	tubulointerstitial nephritis antigen-like 1	Tinagl1	94242	94242	4|4 D2.2	protein-coding	20.1547	20.1017	20.2078	-0.5σ	20.2248	20.1558	20.2248	20.3256	20.1081	19.8916	20.3867	19.888	20.1573	20.1846
789	797	Q9ET54	Palld	5	5	20.2699	20.3976	0.329291	0.915248	-1.0926	KO_1Way down vs WT_12mo	-1.32997	1.11409	-0.127765	Palld	Palld	palladin, cytoskeletal associated protein	Palld	72333	72333	8|8 B3.1	protein-coding	20.3337	20.2699	20.3976	-0.5σ	20.7276	20.5928	20.2143	20.3049	20.1485	20.3071	20.3431	20.069	20.3231	20.3071
654	798	A0A1B0GS91	Svil	5	5	21.0846	20.9958	0.329809	1.06343	1.06343	KO_1Way up vs WT_12mo	-1.07809	1.2192	0.0887315	Svil	Svil	supervillin	Svil	225115	225115	18|18 A1	protein-coding	21.0402	20.9958	21.0846	+0.5σ	21.1413	20.9618	21.1239	20.8403	20.9119	20.9882	21.0252	21.3034	20.9706	21.1355
1602	799	Q99MR9	Ppp1r3a	5	5	19.8928	19.6539	0.33076	1.18011	1.18011	KO_1Way up vs WT_12mo	-1.22534	1.70647	0.238917	Ppp1r3a	Ppp1r3a	protein phosphatase 1, regulatory subunit 3A	Ppp1r3a	140491	140491	6|6 A1	protein-coding	19.7734	19.6539	19.8928	+1σ	20.01	18.8872	19.9772	19.4316	19.9637	19.7082	20.0905	19.7641	19.9951	19.9063
1433	800	P10639	Txn1	5	5	22.3974	22.4809	0.33103	0.943755	-1.0596	KO_1Way down vs WT_12mo	-1.2055	1.0737	-0.0835161	Txn1	Txn1	thioredoxin 1	Txn1	22166	22166	4 B3|4 31.87 cM	protein-coding	22.4392	22.3974	22.4809	-0.5σ	22.1888	22.5053	22.5084	22.6593	22.5428	22.3945	22.3736	22.4752	22.3736	22.37
1516	801	Q8R1G2	Cmbl	5	5	17.7653	17.562	0.332003	1.15136	1.15136	KO_1Way up vs WT_12mo	-1.18983	1.57727	0.203334	Cmbl	Cmbl	carboxymethylenebutenolidase-like (Pseudomonas)	Cmbl	69574	69574	15|15 B2	protein-coding	17.6637	17.562	17.7653	+1σ	17.4452	17.4238	17.7778	17.682	17.4813	18.2433	17.7431	17.3988	17.3282	18.1132
780	802	Q9CZ30	Ola1	5	5	21.3677	21.2875	0.332259	1.0572	1.0572	KO_1Way up vs WT_12mo	-1.07109	1.19713	0.0802548	Ola1	Ola1	Obg-like ATPase 1	Ola1	67059	67059	2|2 C3	protein-coding	21.3276	21.2875	21.3677	+0.5σ	21.0769	21.3441	21.3481	21.2359	21.4323	21.4212	21.2139	21.3147	21.3945	21.4944
1174	803	P97372	Psme2	5	5	17.8657	17.6711	0.332281	1.14441	1.14441	KO_1Way up vs WT_12mo	-1.18121	1.547	0.194605	Psme2	Psme2	proteasome (prosome, macropain) activator subunit 2 (PA28 beta)	Psme2	19188	19188	14 C3|14 28.19 cM	protein-coding	17.7684	17.6711	17.8657	+1σ	17.163	17.8695	18.0168	17.835	17.4711	17.691	17.5895	18.0282	18.172	17.8477
786	804	Q8BFP9	Pdk1	5	5	21.7953	21.8931	0.333312	0.934436	-1.07016	KO_1Way down vs WT_12mo	-1.24569	1.0877	-0.0978321	Pdk1	Pdk1	pyruvate dehydrogenase kinase, isoenzyme 1	Pdk1	228026	228026	2|2 C3	protein-coding	21.8442	21.7953	21.8931	-0.5σ	21.9435	21.7455	22.0052	21.7368	22.0346	21.7382	21.6876	21.7429	22.0742	21.7335
1428	805	E9Q4Z2	Acacb	5	5	16.4818	16.7205	0.333367	0.847524	-1.17991	KO_1Way down vs WT_12mo	-1.70916	1.22769	-0.238674	Acacb	Acacb	acetyl-Coenzyme A carboxylase beta	Acacb	100705	100705	5|5 F	protein-coding	16.6012	16.4818	16.7205	-1σ	16.6167	16.783	16.783	16.7099	16.7099	16.0031	17.3609	16.3707	16.3372	16.3372
1296	806	P09470	Ace	5	5	18.3774	18.2467	0.334217	1.09482	1.09482	KO_1Way up vs WT_12mo	-1.1193	1.34163	0.130692	Ace	Ace	angiotensin I converting enzyme (peptidyl-dipeptidase A) 1	Ace	11421	11421	11 E1|11 68.84 cM	protein-coding	18.312	18.2467	18.3774	+0.5σ	17.9301	18.3416	18.5023	18.2398	18.2198	18.4515	18.6497	18.2404	18.1548	18.3906
1048	807	Q14C51	Ptcd3	5	5	16.9881	16.798	0.335848	1.14087	1.14087	KO_1Way up vs WT_12mo	-1.17942	1.5351	0.190129	Ptcd3	Ptcd3	pentatricopeptide repeat domain 3	Ptcd3	69956	69956	6|6 C1	protein-coding	16.893	16.798	16.9881	+1σ	16.5721	16.4651	16.8757	17.1405	16.9366	16.4817	16.9536	17.1724	17.2889	17.0441
1107	808	Q9R0Q7	Ptges3	5	5	21.2549	21.1623	0.337584	1.06626	1.06626	KO_1Way up vs WT_12mo	-1.08426	1.23271	0.0925646	Ptges3	Ptges3	prostaglandin E synthase 3	Ptges3	56351	56351	10|10 D3	protein-coding	21.2086	21.1623	21.2549	+0.5σ	20.9438	21.1496	21.2894	21.1239	21.3049	21.0544	21.2272	21.2214	21.3501	21.4212
133	809	Q9D051	Pdhb	5	5	28.8091	28.7659	0.338279	1.0304	1.0304	KO_1Way up vs WT_12mo	-1.03859	1.1027	0.0432093	Pdhb	Pdhb	pyruvate dehydrogenase (lipoamide) beta	Pdhb	68263	68263	14|14 A1	protein-coding	28.7875	28.7659	28.8091	+0.5σ	28.7371	28.6765	28.8829	28.7371	28.796	28.7364	28.7955	28.7955	28.8824	28.8359
444	810	Q3UPL0	Sec31a	5	5	21.3572	21.2565	0.339016	1.07233	1.07233	KO_1Way up vs WT_12mo	-1.09258	1.25635	0.100748	Sec31a	Sec31a	Sec31 homolog A (S. cerevisiae)	Sec31a	69162	69162	5|5 E4	protein-coding	21.3069	21.2565	21.3572	+0.5σ	21.352	21.2582	21.3395	21.3019	21.0308	21.5564	21.4496	21.2242	21.1216	21.4343
1439	811	Q99KV1	Dnajb11	5	5	18.832	18.6892	0.339076	1.10404	1.10404	KO_1Way up vs WT_12mo	-1.13374	1.38191	0.142788	Dnajb11	Dnajb11	DnaJ heat shock protein family (Hsp40) member B11	Dnajb11	67838	67838	16|16 B1	protein-coding	18.7606	18.6892	18.832	+0.5σ	18.6905	18.5835	18.4024	18.7841	18.9857	18.8421	18.931	18.475	19.0903	18.8218
102	812	P11499	Hsp90ab1	5	5	27.6336	27.5933	0.340014	1.02835	1.02835	KO_1Way up vs WT_12mo	-1.03622	1.0958	0.040328	Hsp90ab1	Hsp90ab1	heat shock protein 90 alpha (cytosolic), class B member 1	Hsp90ab1	15516	15516	17 B3|17 22.59 cM	protein-coding	27.6135	27.5933	27.6336	+0.5σ	27.7328	27.521	27.5506	27.595	27.567	27.6481	27.6221	27.6221	27.594	27.6818
358	813	Q91YE8	Synpo2	5	5	22.4413	22.4932	0.340099	0.964675	-1.03662	KO_1Way down vs WT_12mo	-1.12493	1.04686	-0.051885	Synpo2	Synpo2	synaptopodin 2	Synpo2	118449	118449	3|3 G1	protein-coding	22.4672	22.4413	22.4932	-0.5σ	22.565	22.5428	22.5231	22.4117	22.4234	22.5103	22.3807	22.4955	22.5075	22.3126
10	814	E9Q447	Sptan1	5	5	27.5279	27.5771	0.3411	0.966449	-1.03472	KO_1Way down vs WT_12mo	-1.11838	1.04459	-0.0492346	Sptan1	Sptan1	spectrin alpha, non-erythrocytic 1	Sptan1	20740	20740	2 B|2 20.93 cM	protein-coding	27.5525	27.5279	27.5771	-0.5σ	27.5506	27.4678	27.623	27.649	27.595	27.4218	27.5501	27.5201	27.6481	27.4991
863	815	Q9DAK9	Phpt1	5	5	22.4561	22.3758	0.342597	1.05723	1.05723	KO_1Way up vs WT_12mo	-1.07418	1.20065	0.0802897	Phpt1	Phpt1	phosphohistidine phosphatase 1	Phpt1	75454	75454	2|2 A3	protein-coding	22.4159	22.3758	22.4561	+0.5σ	22.3402	22.3618	22.3051	22.4672	22.4045	22.4792	22.4156	22.7248	22.2801	22.3807
709	816	E9Q8I0	Cfh	5	5	20.747	20.8552	0.342649	0.927695	-1.07794	KO_1Way down vs WT_12mo	-1.27971	1.10134	-0.108278	Cfh	Cfh	complement component factor h	Cfh	12628	12628	1 61.62 cM|1 F	protein-coding	20.8011	20.747	20.8552	-0.5σ	21.0466	20.6833	20.6924	20.8759	20.9779	20.8195	20.4745	20.699	20.8011	20.9407
1158	817	P08030	Aprt	5	5	19.1387	18.9997	0.34276	1.10118	1.10118	KO_1Way up vs WT_12mo	-1.13202	1.37268	0.139045	Aprt	Aprt	adenine phosphoribosyl transferase	Aprt	11821	11821	8 E1|8 71.91 cM	protein-coding	19.0692	18.9997	19.1387	+0.5σ	19.2058	18.9819	18.8498	18.8775	19.0834	18.7496	19.3972	19.2423	18.9737	19.3308
160	818	Q00898	Serpina1e	5	5	24.4105	24.0363	0.343607	1.29615	1.29615	KO_1Way up vs WT_12mo	-1.39775	2.34822	0.374232	Serpina1e	Serpina1e	serine (or cysteine) peptidase inhibitor, clade A, member 1E	Serpina1e	20704	20704	12|12 E	protein-coding	24.2234	24.0363	24.4105	+2σ	24.3931	24.5977	24.5731	23.6672	22.9503	24.6943	24.639	23.6646	24.5574	24.4971
1199	819	O09131	Gsto1	5	5	18.6519	18.5052	0.343687	1.10709	1.10709	KO_1Way up vs WT_12mo	-1.14039	1.39772	0.146771	Gsto1	Gsto1	glutathione S-transferase omega 1	Gsto1	14873	14873	19|19 D1	protein-coding	18.5785	18.5052	18.6519	+0.5σ	18.2758	18.4781	18.7134	18.4098	18.6487	18.3967	18.9779	18.4599	18.9167	18.5084
245	820	Q9CQQ7	Atp5pb	5	5	27.1519	27.1894	0.344267	0.97434	-1.02634	KO_1Way down vs WT_12mo	-1.08941	1.03422	-0.0375027	Atp5pb	Atp5pb	ATP synthase peripheral stalk-membrane subunit b	Atp5pb	11950	11950	3 F2.2|3 46.46 cM	protein-coding	27.1706	27.1519	27.1894	-0.5σ	27.2395	27.2666	27.2008	27.1689	27.0711	27.1674	27.1674	27.1674	27.0898	27.1674
1515	821	Q07456	Ambp	5	5	18.9814	18.8539	0.344375	1.09242	1.09242	KO_1Way up vs WT_12mo	-1.12126	1.33808	0.127524	Ambp	Ambp	alpha 1 microglobulin/bikunin precursor	Ambp	11699	11699	4 B3|4 33.96 cM	protein-coding	18.9176	18.8539	18.9814	+0.5σ	19.0148	18.5264	18.7049	19.1305	18.8927	18.7919	18.8703	19.1172	18.9986	19.1288
1004	822	Q99K48	Nono	5	5	21.3925	21.4969	0.344446	0.930188	-1.07505	KO_1Way down vs WT_12mo	-1.2693	1.09826	-0.104405	Nono	Nono	non-POU-domain-containing, octamer binding protein	Nono	53610	53610	X|X D	protein-coding	21.4447	21.3925	21.4969	-0.5σ	21.8884	21.4877	21.2939	21.3968	21.4177	21.4087	21.3796	21.3854	21.3463	21.4425
1161	823	O70423	Aoc3	5	5	17.0199	17.2115	0.345915	0.87559	-1.14209	KO_1Way down vs WT_12mo	-1.5508	1.18893	-0.191673	Aoc3	Aoc3	amine oxidase, copper containing 3	Aoc3	11754	11754	11|11 D	protein-coding	17.1157	17.0199	17.2115	-1σ	17.3979	17.3551	17.3646	17.0645	16.8757	16.5373	17.2112	17.3649	17.2473	16.7386
409	824	P18760	Cfl1	5	5	23.8172	23.8595	0.345991	0.971088	-1.02977	KO_1Way down vs WT_12mo	-1.10175	1.03897	-0.042326	Cfl1	Cfl1	cofilin 1, non-muscle	Cfl1	12631	12631	19|19 A	protein-coding	23.8383	23.8172	23.8595	-0.5σ	23.9033	23.8135	23.852	23.8767	23.852	23.7631	23.9126	23.9126	23.7286	23.769
127	825	P20029	Hspa5	5	5	25.6088	25.5791	0.34632	1.0208	1.0208	KO_1Way up vs WT_12mo	-1.02722	1.07041	0.0297034	Hspa5	Hspa5	heat shock protein 5	Hspa5	14828	14828	2 B|2 22.94 cM	protein-coding	25.5939	25.5791	25.6088	+0.5σ	25.5847	25.5707	25.5262	25.5611	25.6527	25.6224	25.5361	25.6655	25.5974	25.6224
411	826	P14869	Rplp0	5	5	23.4314	23.3469	0.347491	1.06031	1.06031	KO_1Way up vs WT_12mo	-1.07977	1.21393	0.0844846	Rplp0	Rplp0	ribosomal protein, large, P0	Rplp0	11837	11837	5|5 F	protein-coding	23.3892	23.3469	23.4314	+0.5σ	23.5347	23.1585	23.3489	23.3938	23.2986	23.4461	23.4214	23.3868	23.2712	23.6315
1188	827	A0A0R4J039	Hrg	5	5	18.8442	18.7023	0.347677	1.10335	1.10335	KO_1Way up vs WT_12mo	-1.13767	1.38498	0.141888	Hrg	Hrg	histidine-rich glycoprotein	Hrg	94175	94175	16 B1|16 13.79 cM	protein-coding	18.7733	18.7023	18.8442	+0.5σ	18.7394	18.4024	18.6863	18.6863	18.9973	18.7644	18.7746	18.523	19.0944	19.0649
1063	828	Q9D6U8	Fam162a	5	5	22.911	23.2417	0.347701	0.795115	-1.25768	KO_1Way down vs WT_12mo	-2.13667	1.35082	-0.330764	Fam162a	Fam162a	family with sequence similarity 162, member A	Fam162a	70186	70186	16|16 B3	protein-coding	23.0764	22.911	23.2417	-1σ	23.325	23.1492	23.0369	23.4893	23.2084	21.6268	23.3232	23.2648	23.1839	23.1562
1801	829	D3YTS1	Sec11a	5	5	17.3429	17.1099	0.348351	1.17532	1.17532	KO_1Way up vs WT_12mo	-1.23666	1.70828	0.233051	Sec11a	Sec11a	SEC11 homolog A, signal peptidase complex subunit	Sec11a	56529	56529	7|7 D3	protein-coding	17.2264	17.1099	17.3429	+1σ	17.5192	16.7554	17.4813	17.0961	16.6973	17.8584	17.0651	17.2209	17.0315	17.5386
269	830	O35887	Calu	5	5	23.6649	23.4966	0.348459	1.12377	1.12377	KO_1Way up vs WT_12mo	-1.16591	1.47239	0.168351	Calu	Calu	calumenin	Calu	12321	12321	6|6 A3.3	protein-coding	23.5807	23.4966	23.6649	+0.5σ	23.1398	23.2664	23.5117	23.8824	23.6825	23.8814	23.4077	23.9277	23.5336	23.5741
476	831	P67778	Phb	5	5	22.9947	22.9115	0.348546	1.05935	1.05935	KO_1Way up vs WT_12mo	-1.07882	1.21069	0.0831817	Phb	Phb	prohibitin	Phb	18673	18673	11 59.01 cM|11 D	protein-coding	22.9531	22.9115	22.9947	+0.5σ	22.6871	23.0369	22.9073	23.096	22.8301	22.8896	22.99	22.9582	23.1376	22.998
710	832	Q9D8E6	Rpl4	5	5	23.1546	23.1025	0.348979	1.03675	1.03675	KO_1Way up vs WT_12mo	-1.04872	1.12722	0.0520682	Rpl4	Rpl4	ribosomal protein L4	Rpl4	67891	67891	9|9 C	protein-coding	23.1286	23.1025	23.1546	+0.5σ	23.1585	23.1861	23.1299	23.0831	22.9552	23.1134	23.1079	23.0871	23.2067	23.258
929	833	Q9CXJ4	Abcb8	5	5	20.8827	20.9778	0.349051	0.936205	-1.06814	KO_1Way down vs WT_12mo	-1.24453	1.09081	-0.0951044	Abcb8	Abcb8	ATP-binding cassette, sub-family B (MDR/TAP), member 8	Abcb8	74610	74610	5|5 A3	protein-coding	20.9303	20.8827	20.9778	-0.5σ	20.9856	21.1888	20.9856	21.0519	20.6771	21.0185	20.8525	20.7366	20.8825	20.9235
500	834	P05125	Nppa	5	5	27.0132	27.0924	0.349224	0.94656	-1.05646	KO_1Way down vs WT_12mo	-1.19998	1.07515	-0.0792334	Nppa	Nppa	natriuretic peptide type A	Nppa	230899	230899	4 E1|4 78.66 cM	protein-coding	27.0528	27.0132	27.0924	-0.5σ	26.8804	27.1689	27.0403	27.1059	27.2666	26.8424	27.0527	27.0898	26.9913	27.0898
763	835	P14148	Rpl7	5	5	22.5652	22.5013	0.35005	1.0453	1.0453	KO_1Way up vs WT_12mo	-1.0604	1.15865	0.0639206	Rpl7	Rpl7	ribosomal protein L7	Rpl7	19989	19989	1|1 A3	protein-coding	22.5332	22.5013	22.5652	+0.5σ	22.396	22.5743	22.4851	22.4766	22.5743	22.3601	22.5831	22.6337	22.6802	22.5687
1722	836	Q8VCM8	Ncln	5	5	20.6491	20.7978	0.350368	0.902096	-1.10853	KO_1Way down vs WT_12mo	-1.40862	1.1463	-0.148648	Ncln	Ncln	nicalin	Ncln	103425	103425	10|10 C1	protein-coding	20.7234	20.6491	20.7978	-0.5σ	20.7172	20.5435	20.8917	21.1132	20.7232	20.5203	20.6698	20.3315	20.6948	21.029
342	837	P27773	Pdia3	5	5	24.664	24.6202	0.35086	1.03084	1.03084	KO_1Way up vs WT_12mo	-1.04115	1.10635	0.0438168	Pdia3	Pdia3	protein disulfide isomerase associated 3	Pdia3	14827	14827	2 E5|2 60.38 cM	protein-coding	24.6421	24.6202	24.664	+0.5σ	24.676	24.5594	24.6654	24.6409	24.5594	24.6163	24.8063	24.6163	24.6517	24.6296
169	838	B0QZL1	Eno1	5	5	21.9008	22.8664	0.351702	0.512088	-1.95279	KO_1Way down vs WT_12mo	-9.29979	2.43872	-0.965537	Eno1	Eno1	enolase 1, alpha non-neuron	Eno1	13806	13806	4 E2|4 81.24 cM	protein-coding	22.3836	21.9008	22.8664	-3σ	21.6777	22.1638	26.7512	21.8931	21.846	21.8709	21.7778	22.0791	21.7585	22.0178
1634	839	Q78XF5	Ostc	5	5	18.7734	18.6297	0.352466	1.10473	1.10473	KO_1Way up vs WT_12mo	-1.14232	1.39411	0.143692	Ostc	Ostc	oligosaccharyltransferase complex subunit (non-catalytic)	Ostc	66357	66357	3|3 G3	protein-coding	18.7016	18.6297	18.7734	+0.5σ	18.565	18.4098	18.9973	18.6595	18.5169	18.6218	18.9416	18.9515	18.4305	18.9214
27	840	E9PWQ3	Col6a3	5	5	26.9521	27.0517	0.352484	0.933266	-1.07151	KO_1Way down vs WT_12mo	-1.25911	1.09667	-0.09964	Col6a3	Col6a3	collagen, type VI, alpha 3	Col6a3	12835	12835	1 D|1 45.53 cM	protein-coding	27.0019	26.9521	27.0517	-0.5σ	27.3066	26.8188	27.0711	26.9263	27.1358	26.7855	27.0243	26.856	27.0243	27.0702
862	841	Q923T9	Camk2g	5	5	20.0813	19.9579	0.354196	1.08927	1.08927	KO_1Way up vs WT_12mo	-1.12187	1.33111	0.123363	Camk2g	Camk2g	calcium/calmodulin-dependent protein kinase II gamma	Camk2g	12325	12325	14|14 A3	protein-coding	20.0196	19.9579	20.0813	+0.5σ	19.6833	19.9975	19.8903	20.0501	20.1684	20.1653	19.7641	20.1432	20.3315	20.0022
746	842	F8VQC7	Ktn1	5	5	19.8481	19.7736	0.354528	1.05298	1.05298	KO_1Way up vs WT_12mo	-1.07198	1.18857	0.074474	Ktn1	Ktn1	kinectin 1	Ktn1	16709	16709	14|14 C1	protein-coding	19.8108	19.7736	19.8481	+0.5σ	19.8349	19.8637	19.778	19.778	19.6136	19.831	19.8607	19.6446	19.869	20.0353
567	843	Q01149	Col1a2	5	5	25.7699	25.8735	0.355136	0.930703	-1.07446	KO_1Way down vs WT_12mo	-1.27196	1.10178	-0.103608	Col1a2	Col1a2	collagen, type I, alpha 2	Col1a2	12843	12843	6 A1|6 1.81 cM	protein-coding	25.8217	25.7699	25.8735	-0.5σ	25.9794	25.684	25.7305	26.1434	25.8304	25.8556	25.9293	25.7928	25.5603	25.7117
1919	844	E9PW66	Nap1l1	5	5	18.6923	18.3561	0.356146	1.26242	1.26242	KO_1Way up vs WT_12mo	-1.37127	2.18542	0.336196	Nap1l1	Nap1l1	nucleosome assembly protein 1-like 1	Nap1l1	53605	53605	10 D1|10 58.67 cM	protein-coding	18.5242	18.3561	18.6923	+1σ	18.4098	18.5722	18.4344	18.8688	17.4953	18.9986	19.3366	18.8939	18.3221	17.9104
381	845	Q9DBF1	Aldh7a1	5	5	21.5613	21.4536	0.357209	1.0775	1.0775	KO_1Way up vs WT_12mo	-1.10689	1.28511	0.107693	Aldh7a1	Aldh7a1	aldehyde dehydrogenase family 7, member A1	Aldh7a1	110695	110695	18 D3|18 30.55 cM	protein-coding	21.5074	21.4536	21.5613	+0.5σ	21.4599	21.5051	21.7872	21.1765	21.3395	21.4024	21.6268	21.5669	21.6592	21.5514
907	846	Q8K0Z7	Taco1	5	5	20.4273	20.2861	0.357455	1.1028	1.1028	KO_1Way up vs WT_12mo	-1.14253	1.38951	0.14117	Taco1	Taco1	translational activator of mitochondrially encoded cytochrome c oxidase I	Taco1	70207	70207	11|11 E1	protein-coding	20.3567	20.2861	20.4273	+0.5σ	20.273	19.9874	20.5283	20.4899	20.1521	20.6506	20.0406	20.5203	20.4646	20.4604
185	847	Q9DB20	Atp5o	5	5	27.7343	27.7758	0.358144	0.971635	-1.02919	KO_1Way down vs WT_12mo	-1.10168	1.04007	-0.0415131	Atp5o	Atp5o	ATP synthase, H+ transporting, mitochondrial F1 complex, O subunit	Atp5o	28080	28080	16|16 C4	protein-coding	27.7551	27.7343	27.7758	-0.5σ	27.8919	27.8182	27.7032	27.7328	27.7328	27.7317	27.7317	27.6481	27.7655	27.7944
1735	848	Q505D7	Opa3	5	5	19.0901	19.2074	0.35843	0.921908	-1.08471	KO_1Way down vs WT_12mo	-1.31489	1.11754	-0.117306	Opa3	Opa3	optic atrophy 3	Opa3	403187	403187	7|7 A3	protein-coding	19.1487	19.0901	19.2074	-0.5σ	19.4419	19.3131	19.4149	19.0216	18.8456	19.085	19.0227	19.1774	19.1211	19.0443
781	849	D3YVS1	Smtn	5	5	18.2909	17.9133	0.358821	1.29922	1.29922	KO_1Way up vs WT_12mo	-1.4309	2.41531	0.377645	Smtn	Smtn	smoothelin	Smtn	29856	29856	11|11 A1	protein-coding	18.1021	17.9133	18.2909	+2σ	18.2858	17.8959	18.6019	16.434	18.3487	18.3349	18.3752	18.2925	18.2494	18.2025
785	850	P62196	Psmc5	5	5	20.5918	20.6959	0.360805	0.930348	-1.07487	KO_1Way down vs WT_12mo	-1.2763	1.1047	-0.104158	Psmc5	Psmc5	protease (prosome, macropain) 26S subunit, ATPase 5	Psmc5	19184	19184	11|11 E1	protein-coding	20.6439	20.5918	20.6959	-0.5σ	20.6371	20.8295	20.4209	20.806	20.7862	20.5796	20.7085	20.3171	20.7477	20.606
67	851	Q9CZ13	Uqcrc1	5	5	27.2088	27.2714	0.361997	0.957568	-1.04431	KO_1Way down vs WT_12mo	-1.1581	1.06191	-0.0625527	Uqcrc1	Uqcrc1	ubiquinol-cytochrome c reductase core protein 1	Uqcrc1	22273	22273	9 F2|9 59.63 cM	protein-coding	27.2401	27.2088	27.2714	-0.5σ	27.2008	27.2395	27.3066	27.4411	27.1689	27.1047	27.2653	27.3043	27.2653	27.1047
1385	852	O70475	Ugdh	5	5	16.0269	15.75	0.362104	1.21166	1.21166	KO_1Way up vs WT_12mo	-1.30485	1.91568	0.276983	Ugdh	Ugdh	UDP-glucose dehydrogenase	Ugdh	22235	22235	5 C3.1|5 33.67 cM	protein-coding	15.8885	15.75	16.0269	+1σ	15.2103	15.5733	16.2037	15.9137	15.8488	15.7998	15.5359	16.5241	16.6441	15.6308
839	853	A0A0N4SVK8	Adprhl1	5	5	20.9453	21.0274	0.362293	0.944677	-1.05856	KO_1Way down vs WT_12mo	-1.21259	1.08213	-0.0821064	Adprhl1	Adprhl1	ADP-ribosylhydrolase like 1	Adprhl1	234072	234072	8|8 A1.1	protein-coding	20.9864	20.9453	21.0274	-0.5σ	21.1036	21.1285	20.9036	20.9812	21.0202	20.7404	20.8195	20.9706	21.1521	21.044
199	854	Q99NB1	Acss1	5	5	25.0916	25.1498	0.36253	0.960497	-1.04113	KO_1Way down vs WT_12mo	-1.14632	1.05755	-0.0581476	Acss1	Acss1	acyl-CoA synthetase short-chain family member 1	Acss1	68738	68738	2|2 G3	protein-coding	25.1207	25.0916	25.1498	-0.5σ	25.1391	25.2479	25.1059	25.2024	25.0534	25.0911	25.2464	24.9349	25.1042	25.0814
1507	855	P61202	Cops2	5	5	18.5955	18.476	0.362957	1.08636	1.08636	KO_1Way up vs WT_12mo	-1.12207	1.32425	0.119504	Cops2	Cops2	COP9 signalosome subunit 2	Cops2	12848	12848	2 F1|2 61.76 cM	protein-coding	18.5358	18.476	18.5955	+0.5σ	18.4295	18.637	18.4928	18.37	18.4507	18.4599	18.9351	18.2769	18.7644	18.5413
810	856	P09528	Fth1	5	5	21.9479	21.7605	0.363641	1.1387	1.1387	KO_1Way up vs WT_12mo	-1.1985	1.55403	0.187393	Fth1	Fth1	ferritin heavy polypeptide 1	Fth1	14319	14319	19 A|19 6.23 cM	protein-coding	21.8542	21.7605	21.9479	+1σ	21.8528	21.5535	21.5852	21.7097	22.1013	22.4882	22.0791	21.7359	21.4985	21.9377
1929	857	Q9CQT1	Mri1	5	5	14.079	14.1855	0.364211	0.928869	-1.07658	KO_1Way down vs WT_12mo	-1.28487	1.10858	-0.106453	Mri1	Mri1	methylthioribose-1-phosphate isomerase 1	Mri1	67873	67873	8|8 C2	protein-coding	14.1323	14.079	14.1855	-0.5σ	13.8625	14.1235	14.3757	14.1235	14.4423	14.0193	14.2134	14.0193	14.1237	14.0193
1280	858	Q920Q6	Msi2	5	5	21.0887	20.9678	0.364774	1.08744	1.08744	KO_1Way up vs WT_12mo	-1.12453	1.32979	0.120941	Msi2	Msi2	musashi RNA-binding protein 2	Msi2	76626	76626	11|11 C	protein-coding	21.0282	20.9678	21.0887	+0.5σ	21.1942	21.0233	20.6161	21.2056	20.7997	21.0584	20.9604	21.1919	21.2272	21.0058
728	859	P62192	Psmc1	5	5	21.5315	21.4268	0.365026	1.07531	1.07531	KO_1Way up vs WT_12mo	-1.10711	1.28014	0.104753	Psmc1	Psmc1	protease (prosome, macropain) 26S subunit, ATPase 1	Psmc1	19179	19179	12 E|12 50.43 cM	protein-coding	21.4792	21.4268	21.5315	+0.5σ	21.3178	21.7368	21.4782	21.4599	21.1413	21.49	21.6942	21.576	21.4267	21.4708
784	860	Q9WTP6	Ak2	5	5	21.4492	22.4145	0.365102	0.512178	-1.95245	KO_1Way down vs WT_12mo	-9.7381	2.55456	-0.965282	Ak2	Ak2	adenylate kinase 2	Ak2	11637	11637	4 D2.2|4 62.62 cM	protein-coding	21.9319	21.4492	22.4145	-3σ	21.4177	21.4962	21.2359	21.5051	26.4177	21.4577	21.4758	21.4343	21.179	21.6993
39	861	Q8K2B3	Sdha	5	5	27.9086	27.9421	0.365298	0.977053	-1.02349	KO_1Way down vs WT_12mo	-1.0822	1.0331	-0.0334912	Sdha	Sdha	succinate dehydrogenase complex, subunit A, flavoprotein (Fp)	Sdha	66945	66945	13|13 C1	protein-coding	27.9254	27.9086	27.9421	-0.5σ	27.9112	27.9833	27.9392	28.0066	27.8701	27.8693	27.9383	27.9826	27.842	27.9106
1595	862	P61759	Vbp1	5	5	16.9281	16.8377	0.365448	1.06463	1.06463	KO_1Way up vs WT_12mo	-1.09188	1.23758	0.090353	Vbp1	Vbp1	von Hippel-Lindau binding protein 1	Vbp1	22327	22327	X A7.3|X 38.25 cM	protein-coding	16.8829	16.8377	16.9281	+0.5σ	16.9526	16.8621	17.0431	16.5563	16.7744	16.9028	17.0848	16.8495	16.8495	16.9536
1824	863	A0A0R4J032	C9	5	5	16.4172	16.5513	0.366049	0.91122	-1.09743	KO_1Way down vs WT_12mo	-1.37263	1.13973	-0.134129	C9	C9	complement component 9	C9	12279	12279	15|15 A1	protein-coding	16.4842	16.4172	16.5513	-0.5σ	16.8242	16.6002	16.6777	16.3512	16.3033	16.5728	16.4349	16.1675	16.6874	16.2233
1129	864	Q9CPV4	Glod4	5	5	21.069	20.9834	0.366057	1.06115	1.06115	KO_1Way up vs WT_12mo	-1.08709	1.22411	0.0856325	Glod4	Glod4	glyoxalase domain containing 4	Glod4	67201	67201	11|11 B5	protein-coding	21.0262	20.9834	21.069	+0.5σ	21.1496	21.0081	21.027	20.697	21.0351	20.8985	21.1548	21.0494	21.0846	21.1577
1484	865	A0A0A6YX26	Rpl31	5	5	21.1498	21.0718	0.366401	1.05558	1.05558	KO_1Way up vs WT_12mo	-1.07918	1.20248	0.0780419	Rpl31	Rpl31	ribosomal protein L31	Rpl31	114641	114641	1|1 B	protein-coding	21.1108	21.0718	21.1498	+0.5σ	21.1192	20.9438	21.3106	20.9582	21.027	21.1063	21.2453	21.1302	21.0103	21.2569
263	866	Q8BGH2	Samm50	5	5	24.5248	24.4738	0.366887	1.03597	1.03597	KO_1Way up vs WT_12mo	-1.05113	1.12811	0.0509802	Samm50	Samm50	SAMM50 sorting and assembly machinery component	Samm50	68653	68653	15|15 E2	protein-coding	24.4993	24.4738	24.5248	+0.5σ	24.3777	24.5731	24.5333	24.359	24.5261	24.4201	24.5246	24.5125	24.5708	24.596
1572	867	P61961	Ufm1	5	5	17.9956	17.693	0.366958	1.23338	1.23338	KO_1Way up vs WT_12mo	-1.3446	2.04545	0.302623	Ufm1	Ufm1	ubiquitin-fold modifier 1	Ufm1	67890	67890	3|3 C	protein-coding	17.8443	17.693	17.9956	+1σ	18.0273	17.3746	17.6675	17.5759	17.8195	18.3752	16.825	18.1341	18.2404	18.4033
642	868	Q9QZQ8	Macroh2a1	5	5	22.0772	21.9909	0.36739	1.0616	1.0616	KO_1Way up vs WT_12mo	-1.08819	1.22638	0.0862384	Macroh2a1	Macroh2a1	macroH2A.1 histone	Macroh2a1	26914	26914	13|13 B1	protein-coding	22.0341	21.9909	22.0772	+0.5σ	21.7872	21.8731	22.0911	22.1059	22.0974	21.8613	22.2287	22.109	22.1244	22.0625
867	869	Q8R127	Sccpdh	5	5	19.2744	19.0614	0.367655	1.15911	1.15911	KO_1Way up vs WT_12mo	-1.23241	1.65579	0.21302	Sccpdh	Sccpdh	saccharopine dehydrogenase (putative)	Sccpdh	109232	109232	1|1 H4	protein-coding	19.1679	19.0614	19.2744	+1σ	18.9857	18.9257	19.0331	18.8971	19.4653	18.6651	19.4161	19.6158	19.7013	18.9737
201	870	Q91VB8	Hba-a1	5	5	26.9688	26.7504	0.3681	1.16341	1.16341	KO_1Way up vs WT_12mo	-1.23933	1.67745	0.218359	Hba-a1	Hba-a1	hemoglobin alpha, adult chain 1	Hba-a1	15122	15122	11 A4|11 18.86 cM	protein-coding	26.8596	26.7504	26.9688	+1σ	27.1689	26.8804	26.3281	26.556	26.8188	27.3043	27.3968	26.4388	26.7267	26.9773
355	871	P11087	Col1a1	5	5	27.0633	27.1679	0.368751	0.93012	-1.07513	KO_1Way down vs WT_12mo	-1.28124	1.10843	-0.104511	Col1a1	Col1a1	collagen, type I, alpha 1	Col1a1	12842	12842	11 59.01 cM|11 D	protein-coding	27.1156	27.0633	27.1679	-0.5σ	27.0711	27.0711	27.1059	27.4852	27.1059	26.8303	27.0898	27.0527	27.3043	27.0397
111	872	Q02053	Uba1	5	5	24.7803	24.7485	0.368845	1.02231	1.02231	KO_1Way up vs WT_12mo	-1.03186	1.07841	0.03183	Uba1	Uba1	ubiquitin-like modifier activating enzyme 1	Uba1	22201	22201	X A1.3|X 16.15 cM	protein-coding	24.7644	24.7485	24.7803	+0.5σ	24.7595	24.7595	24.7362	24.6654	24.822	24.7767	24.7959	24.758	24.7191	24.8521
1509	873	Q9D7J4	Cox20	5	5	20.4767	20.8644	0.369167	0.764391	-1.30823	KO_1Way down vs WT_12mo	-2.5087	1.46582	-0.387617	Cox20	Cox20	cytochrome c oxidase assembly protein 20	Cox20	66359	66359	1|1 H4	protein-coding	20.6705	20.4767	20.8644	-2σ	21.1087	20.9856	20.8295	20.5014	20.8965	20.8633	20.7801	20.8735	20.9632	18.9037
1916	874	Q62348	Tsn	5	5	18.241	17.9589	0.369235	1.21597	1.21597	KO_1Way up vs WT_12mo	-1.321	1.95319	0.282104	Tsn	Tsn	translin	Tsn	22099	22099	1|1 E2.3	protein-coding	18.0999	17.9589	18.241	+1σ	18.0444	17.0554	18.1288	17.9714	18.5943	18.5133	17.7239	18.0178	18.4515	18.4982
51	875	P70670	Naca	5	5	25.1748	25.202	0.370136	0.981359	-1.01899	KO_1Way down vs WT_12mo	-1.06664	1.02724	-0.0271469	Naca	Naca	nascent polypeptide-associated complex alpha polypeptide	Naca	17938	17938	10|10 D3	protein-coding	25.1884	25.1748	25.202	-0.5σ	25.1913	25.1789	25.1789	25.2128	25.2479	25.1676	25.0911	25.2464	25.2013	25.1676
888	876	P24270	Cat	5	5	20.7966	20.901	0.370715	0.930223	-1.07501	KO_1Way down vs WT_12mo	-1.28173	1.1091	-0.104351	Cat	Cat	catalase	Cat	12359	12359	2 E2|2 54.43 cM	protein-coding	20.8488	20.7966	20.901	-0.5σ	21.1457	20.6924	20.6527	21.1285	20.8854	20.8039	20.8887	20.6698	20.8195	20.8011
1228	877	A6H6A9	Rabgap1l	5	5	18.3786	18.1769	0.373185	1.15004	1.15004	KO_1Way up vs WT_12mo	-1.22384	1.61865	0.201689	Rabgap1l	Rabgap1l	RAB GTPase activating protein 1-like	Rabgap1l	29809	29809	1|1 H2.1	protein-coding	18.2778	18.1769	18.3786	+1σ	17.9838	18.4469	18.3742	17.5823	18.4972	18.5304	18.4884	18.6651	17.9598	18.2494
1438	878	Q3UX10	Tubal3	5	5	19.1478	18.9649	0.373765	1.13518	1.13518	KO_1Way up vs WT_12mo	-1.20153	1.54835	0.182926	Tubal3	Tubal3	tubulin, alpha-like 3	Tubal3	238463	238463	13|13 A1	protein-coding	19.0563	18.9649	19.1478	+0.5σ	19.1244	18.4507	19.0505	18.7394	19.4596	18.9832	19.0346	19.0023	19.2864	19.4327
1577	879	P11352	Gpx1	5	5	19.7853	19.7198	0.373905	1.04647	1.04647	KO_1Way up vs WT_12mo	-1.06803	1.1696	0.0655364	Gpx1	Gpx1	glutathione peroxidase 1	Gpx1	14775	14775	9 F2|9 59.24 cM	protein-coding	19.7525	19.7198	19.7853	+0.5σ	19.914	19.6949	19.593	19.8039	19.593	19.7406	19.7151	19.7526	19.8736	19.8447
906	880	A0A0B4J1E7	Kpna4	5	5	18.2565	18.0524	0.375276	1.15203	1.15203	KO_1Way up vs WT_12mo	-1.22886	1.63091	0.20418	Kpna4	Kpna4	karyopherin (importin) alpha 4	Kpna4	16649	16649	3|3 E1	protein-coding	18.1545	18.0524	18.2565	+1σ	17.8397	18.0623	18.0874	17.852	18.4205	18.7455	17.8901	17.7374	18.4213	18.4884
21	881	Q62261	Sptbn1	5	5	26.3021	26.2679	0.375415	1.02404	1.02404	KO_1Way up vs WT_12mo	-1.03521	1.08557	0.0342662	Sptbn1	Sptbn1	spectrin beta, non-erythrocytic 1	Sptbn1	20742	20742	11 A3.3|11 17.44 cM	protein-coding	26.285	26.2679	26.3021	+0.5σ	26.2801	26.213	26.2801	26.2614	26.3046	26.3126	26.2932	26.3559	26.1814	26.3676
790	882	Q9CZB0	Sdhc	5	5	24.8313	24.794	0.376404	1.02624	1.02624	KO_1Way up vs WT_12mo	-1.0386	1.09382	0.0373671	Sdhc	Sdhc	succinate dehydrogenase complex, subunit C, integral membrane protein	Sdhc	66052	66052	1|1 H3	protein-coding	24.8127	24.794	24.8313	+0.5σ	24.8378	24.8378	24.7082	24.7779	24.8082	24.7866	24.8521	24.8355	24.9349	24.7475
1104	883	Q792Z1	Try10	5	5	21.4255	21.1654	0.376872	1.19756	1.19756	KO_1Way up vs WT_12mo	-1.30224	1.86762	0.2601	Try10	Try10	trypsin 10	Try10	436522	436522	6|6 B1	protein-coding	21.2954	21.1654	21.4255	+1σ	21.7612	20.8025	20.8171	21.0642	21.3823	22.0178	21.7429	21.3311	20.8085	21.2272
467	884	P07309	Ttr	5	5	23.9391	23.8346	0.377082	1.07515	1.07515	KO_1Way up vs WT_12mo	-1.11207	1.28548	0.104534	Ttr	Ttr	transthyretin	Ttr	22139	22139	18 A2|18 11.47 cM	protein-coding	23.8868	23.8346	23.9391	+0.5σ	23.711	23.5117	24.0571	23.8557	24.0376	24.0899	23.8663	23.9445	23.9596	23.8354
1482	885	A0A0R4J174	Ecsit	5	5	15.3257	15.4285	0.379269	0.931263	-1.07381	KO_1Way down vs WT_12mo	-1.28104	1.11098	-0.10274	Ecsit	Ecsit	ECSIT signalling integrator	Ecsit	26940	26940	9|9 A3	protein-coding	15.3771	15.3257	15.4285	-0.5σ	15.4091	15.4393	15.657	15.3337	15.3033	15.0335	15.2111	15.3775	15.5359	15.4707
727	886	P62264	Rps14	5	5	22.8726	22.9457	0.381323	0.950582	-1.05199	KO_1Way down vs WT_12mo	-1.19343	1.07839	-0.0731167	Rps14	Rps14	ribosomal protein S14	Rps14	20044	20044	18 E1|18 34.4 cM	protein-coding	22.9092	22.8726	22.9457	-0.5σ	23.2018	22.9847	22.7906	22.8959	22.8556	22.9635	22.9	22.9109	22.8013	22.7873
2034	887	Q9R111	Gda	5	5	16.6939	16.9061	0.381404	0.863201	-1.15848	KO_1Way down vs WT_12mo	-1.67087	1.24499	-0.212232	Gda	Gda	guanine deaminase	Gda	14544	14544	19 B|19 14.32 cM	protein-coding	16.8	16.6939	16.9061	-1σ	17.0719	16.7231	16.6869	16.7377	17.3111	16.2454	16.8374	16.756	16.3186	17.312
1138	888	P97351	Rps3a1	5	5	21.7	21.9034	0.382354	0.868526	-1.15138	KO_1Way down vs WT_12mo	-1.6366	1.23455	-0.203359	Rps3a1	Rps3a1	ribosomal protein S3A1	Rps3a1	20091	20091	3|3 F1	protein-coding	21.8017	21.7	21.9034	-1σ	22.7393	21.7722	21.492	21.8631	21.6503	21.7489	21.6592	21.6268	21.68	21.7853
488	889	Q922I7	Ptbp1	5	5	20.0236	19.912	0.38262	1.08036	1.08036	KO_1Way up vs WT_12mo	-1.12261	1.31029	0.111515	Ptbp1	Ptbp1	polypyrimidine tract binding protein 1	Ptbp1	19205	19205	10 C1|10 39.72 cM	protein-coding	19.9678	19.912	20.0236	+0.5σ	19.6641	19.8219	20.074	19.8588	20.1414	19.9891	20.0022	20.1103	20.2635	19.7526
243	890	Q63918	Cavin2	5	5	24.6681	24.6121	0.382702	1.03956	1.03956	KO_1Way up vs WT_12mo	-1.05979	1.1453	0.0559744	Cavin2	Cavin2	caveolae associated 2	Cavin2	20324	20324	1|1 C1.1	protein-coding	24.6401	24.6121	24.6681	+0.5σ	24.6846	24.5147	24.6535	24.4996	24.7082	24.7475	24.683	24.6637	24.5125	24.7339
1178	891	P00416	COX3	5	5	23.9443	24.0833	0.383192	0.908143	-1.10115	KO_1Way down vs WT_12mo	-1.40099	1.15543	-0.139008	COX3	COX3	cytochrome c oxidase subunit III	mt-Co3	17710	17710	-	protein-coding	24.0138	23.9443	24.0833	-0.5σ	24.3484	24.1014	23.8681	24.21	23.8884	24.1325	24.0359	24.1495	23.5024	23.9011
630	892	P24369	Ppib	5	5	23.8415	23.7906	0.384671	1.03592	1.03592	KO_1Way up vs WT_12mo	-1.05464	1.13175	0.0509063	Ppib	Ppib	peptidylprolyl isomerase B	Ppib	19035	19035	9|9 C	protein-coding	23.8161	23.7906	23.8415	+0.5σ	23.7784	23.9285	23.8265	23.655	23.7646	23.7852	23.8814	23.8663	23.9277	23.7468
90	893	F8WIT2	Anxa6	5	5	26.0249	26.0642	0.384961	0.973082	-1.02766	KO_1Way down vs WT_12mo	-1.10049	1.04204	-0.0393662	Anxa6	Anxa6	annexin A6	Anxa6	11749	11749	11 B1.3|11 32.13 cM	protein-coding	26.0446	26.0249	26.0642	-0.5σ	25.9628	26.1038	26.0727	26.0135	26.1683	26.0537	26.012	25.9781	26.1023	25.9781
1554	894	A0A1D5RM85	Rpl18a	5	5	20.9768	20.9194	0.386624	1.04063	1.04063	KO_1Way up vs WT_12mo	-1.06234	1.15042	0.057457	Rpl18a	Rpl18a	ribosomal protein L18A	Rpl18a	76808	76808	8|8 B3.3	protein-coding	20.9481	20.9194	20.9768	+0.5σ	20.7909	20.9967	20.9646	20.8713	20.9734	20.8944	20.9057	21.0891	20.8887	21.1063
1159	895	Q149B8	Perm1	5	5	18.3536	18.5713	0.387301	0.859945	-1.16287	KO_1Way down vs WT_12mo	-1.70141	1.2582	-0.217684	Perm1	Perm1	PPARGC1 and ESRR induced regulator, muscle 1	Perm1	74183	74183	4|4 E2	protein-coding	18.4625	18.3536	18.5713	-1σ	18.1168	18.8205	19.18	18.7223	18.0168	18.2822	18.2367	18.5625	18.1178	18.5688
338	896	Q9DCT2	Ndufs3	5	5	25.8396	25.8013	0.387642	1.02693	1.02693	KO_1Way up vs WT_12mo	-1.04133	1.09817	0.038335	Ndufs3	Ndufs3	NADH:ubiquinone oxidoreductase core subunit S3	Ndufs3	68349	68349	2|2 E1	protein-coding	25.8205	25.8013	25.8396	+0.5σ	25.684	25.8701	25.7844	25.8113	25.8568	25.9127	25.8293	25.8005	25.8827	25.7731
662	897	Q9CQR4	Acot13	5	5	24.6328	24.6892	0.38795	0.961707	-1.03982	KO_1Way down vs WT_12mo	-1.1476	1.06139	-0.0563307	Acot13	Acot13	acyl-CoA thioesterase 13	Acot13	66834	66834	13|13 A3.1	protein-coding	24.661	24.6328	24.6892	-0.5σ	24.7362	24.7779	24.5261	24.721	24.6846	24.4971	24.5844	24.6296	24.7339	24.7191
341	898	P42669	Pura	5	5	22.2964	22.2314	0.388479	1.04609	1.04609	KO_1Way up vs WT_12mo	-1.07131	1.17234	0.0650048	Pura	Pura	purine rich element binding protein A	Pura	19290	19290	18|18 B2	protein-coding	22.2639	22.2314	22.2964	+0.5σ	22.1059	22.2039	22.3141	22.1254	22.4078	22.1827	22.3846	22.3177	22.2126	22.3846
357	899	F8WIV2	Serpinb6a	5	5	23.9089	23.8585	0.388839	1.03557	1.03557	KO_1Way up vs WT_12mo	-1.05496	1.13134	0.0504215	Serpinb6a	Serpinb6a	serine (or cysteine) peptidase inhibitor, clade B, member 6a	Serpinb6a	20719	20719	13 A3.3|13 14.0 cM	protein-coding	23.8837	23.8585	23.9089	+0.5σ	23.9534	23.8824	23.7403	23.7706	23.9459	23.8241	23.9011	23.9714	23.8508	23.9973
373	900	P02463	Col4a1	5	5	23.6496	23.7302	0.389832	0.945698	-1.05742	KO_1Way down vs WT_12mo	-1.21828	1.08957	-0.080548	Col4a1	Col4a1	collagen, type IV, alpha 1	Col4a1	12826	12826	8 A1.1|8 5.53 cM	protein-coding	23.6899	23.6496	23.7302	-0.5σ	23.8884	23.7569	23.5919	23.7207	23.6929	23.3925	23.7961	23.5741	23.7468	23.7385
370	901	P08752	Gnai2	5	5	23.9877	24.0352	0.390313	0.967634	-1.03345	KO_1Way down vs WT_12mo	-1.12349	1.05194	-0.0474664	Gnai2	Gnai2	guanine nucleotide binding protein (G protein), alpha inhibiting 2	Gnai2	14678	14678	9 F1|9 58.43 cM	protein-coding	24.0114	23.9877	24.0352	-0.5σ	24.2375	23.9906	23.9815	23.9675	23.9988	23.9445	23.9973	23.9797	24.0047	24.0123
319	902	E9PV24	Fga	5	5	24.2035	24.1217	0.390804	1.05837	1.05837	KO_1Way up vs WT_12mo	-1.09141	1.22254	0.0818457	Fga	Fga	fibrinogen alpha chain	Fga	14161	14161	3 E3|3 36.96 cM	protein-coding	24.1626	24.1217	24.2035	+0.5σ	24.0571	23.9033	24.2375	24.1922	24.2182	24.0698	24.1122	24.1852	24.2089	24.4415
75	903	Q9QVP4	Myl7	5	5	30.5563	30.4823	0.392056	1.05262	1.05262	KO_1Way up vs WT_12mo	-1.08267	1.1996	0.0739803	Myl7	Myl7	myosin, light polypeptide 7, regulatory	Myl7	17898	17898	11 A1|11 3.88 cM	protein-coding	30.5193	30.4823	30.5563	+0.5σ	30.5096	30.3399	30.6111	30.3399	30.6111	30.3386	30.6107	30.6107	30.6107	30.6107
812	904	Q9CZ44	Nsfl1c	5	5	20.4714	20.411	0.392348	1.04277	1.04277	KO_1Way up vs WT_12mo	-1.0671	1.16033	0.060422	Nsfl1c	Nsfl1c	NSFL1 (p97) cofactor (p47)	Nsfl1c	386649	386649	2|2 G3	protein-coding	20.4412	20.411	20.4714	+0.5σ	20.3927	20.5402	20.4402	20.3479	20.3338	20.3724	20.3273	20.6338	20.5371	20.4864
1454	905	A0A0R4J0Z1	Pdia4	5	5	19.1487	19.0363	0.392514	1.08102	1.08102	KO_1Way up vs WT_12mo	-1.12847	1.31873	0.112389	Pdia4	Pdia4	protein disulfide isomerase associated 4	Pdia4	12304	12304	6 B2.3|6 22.94 cM	protein-coding	19.0925	19.0363	19.1487	+0.5σ	19.0972	19.1923	18.9686	19.2142	18.7095	19.1172	19.1211	18.9167	19.4361	19.1526
426	906	P35564	Canx	5	5	24.1971	24.1542	0.393299	1.03022	1.03022	KO_1Way up vs WT_12mo	-1.04742	1.11168	0.0429555	Canx	Canx	calnexin	Canx	12330	12330	11 B1.3|11 30.46 cM	protein-coding	24.1757	24.1542	24.1971	+0.5σ	24.2024	24.1514	24.0292	24.2182	24.1697	24.1778	24.1679	24.1911	24.1237	24.3252
237	907	P09103	P4hb	5	5	24.2387	24.2053	0.393923	1.02343	1.02343	KO_1Way up vs WT_12mo	-1.03678	1.08594	0.0334167	P4hb	P4hb	prolyl 4-hydroxylase, beta polypeptide	P4hb	18453	18453	11 E2|11 84.27 cM	protein-coding	24.222	24.2053	24.2387	+0.5σ	24.1861	24.1793	24.1697	24.2633	24.2282	24.2619	24.1237	24.3252	24.2359	24.2471
1187	908	P60867	Rps20	5	5	22.4302	22.5078	0.39536	0.947674	-1.05521	KO_1Way down vs WT_12mo	-1.21136	1.0879	-0.0775366	Rps20	Rps20	ribosomal protein S20	Rps20	67427	67427	4|4 A1	protein-coding	22.469	22.4302	22.5078	-0.5σ	22.7327	22.5494	22.3569	22.5084	22.3915	22.5177	22.2191	22.4348	22.4656	22.5139
412	909	Q9D6J6	Ndufv2	5	5	23.5009	23.3856	0.395422	1.08321	1.08321	KO_1Way up vs WT_12mo	-1.13353	1.33003	0.115318	Ndufv2	Ndufv2	NADH:ubiquinone oxidoreductase core subunit V2	Ndufv2	72900	72900	17 35.26 cM|17 E1.1	protein-coding	23.4432	23.3856	23.5009	+0.5σ	22.9125	23.5414	23.4168	23.5287	23.5287	23.4742	23.5741	23.4669	23.6221	23.3673
541	910	Q3U3J1	Bckdha	5	5	23.0852	23.0381	0.395684	1.03315	1.03315	KO_1Way up vs WT_12mo	-1.05252	1.12347	0.0470556	Bckdha	Bckdha	branched chain ketoacid dehydrogenase E1, alpha polypeptide	Bckdha	12039	12039	7|7 A3	protein-coding	23.0617	23.0381	23.0852	+0.5σ	22.9552	23.0444	23.0764	23.1225	22.9919	23.006	23.0591	23.0342	23.2516	23.075
402	911	P47754	Capza2	5	5	22.9509	22.8287	0.397363	1.08839	1.08839	KO_1Way up vs WT_12mo	-1.14311	1.35412	0.122198	Capza2	Capza2	capping protein (actin filament) muscle Z-line, alpha 2	Capza2	12343	12343	6 A2|6 7.96 cM	protein-coding	22.8898	22.8287	22.9509	+0.5σ	22.3357	22.9206	23.0444	22.8173	23.0257	22.9582	22.9708	22.7958	23.0591	22.9708
1743	912	Q9EPL8	Ipo7	5	5	16.0876	15.9358	0.398538	1.11095	1.11095	KO_1Way up vs WT_12mo	-1.18158	1.45832	0.151794	Ipo7	Ipo7	importin 7	Ipo7	233726	233726	7|7 E3	protein-coding	16.0117	15.9358	16.0876	+0.5σ	15.6021	16.2226	15.737	16.2037	15.9137	15.9396	16.0554	15.7627	16.2454	16.4349
1715	913	A3KMP2	Ttc38	5	5	17.7617	17.9161	0.399709	0.898546	-1.11291	KO_1Way down vs WT_12mo	-1.46862	1.18574	-0.154336	Ttc38	Ttc38	tetratricopeptide repeat domain 38	Ttc38	239570	239570	15|15 E2	protein-coding	17.8389	17.7617	17.9161	-0.5σ	17.7231	18.0225	18.2543	17.8435	17.737	17.5386	17.783	18.2983	17.6569	17.532
632	914	Q99JI6	Rap1b	5	5	20.099	20.2302	0.400504	0.913089	-1.09518	KO_1Way down vs WT_12mo	-1.38689	1.15629	-0.131173	Rap1b	Rap1b	RAS related protein 1b	Rap1b	215449	215449	10|10 D2	protein-coding	20.1646	20.099	20.2302	-0.5σ	20.4209	19.9726	20.1259	20.1414	20.4899	20.1965	19.9332	19.7583	20.2296	20.3773
990	915	Q8BH61	F13a1	5	5	20.5788	20.4596	0.400551	1.08614	1.08614	KO_1Way up vs WT_12mo	-1.14111	1.34617	0.119212	F13a1	F13a1	coagulation factor XIII, A1 subunit	F13a1	74145	74145	13|13 A3.3	protein-coding	20.5192	20.4596	20.5788	+0.5σ	20.6161	20.6486	20.2778	20.38	20.3754	20.5522	20.878	20.2017	20.7204	20.5417
180	916	Q02257	Jup	5	5	23.9414	24.0003	0.401682	0.960001	-1.04167	KO_1Way down vs WT_12mo	-1.15849	1.06767	-0.0588916	Jup	Jup	junction plakoglobin	Jup	16480	16480	11 D|11 63.47 cM	protein-coding	23.9708	23.9414	24.0003	-0.5σ	24.1922	23.9534	24.006	23.9815	23.8681	24.063	23.8508	23.9011	23.8872	24.0047
290	917	P27546	Map4	5	5	23.1996	23.2939	0.403669	0.936748	-1.06752	KO_1Way down vs WT_12mo	-1.26648	1.11133	-0.0942666	Map4	Map4	microtubule-associated protein 4	Map4	17758	17758	9 F2|9 59.83 cM	protein-coding	23.2467	23.1996	23.2939	-0.5σ	23.1663	23.1299	23.5633	23.4168	23.1933	23.1079	23.4272	23.2712	23.075	23.1171
354	918	Q8BWF0	Aldh5a1	5	5	22.6116	22.6766	0.403716	0.95597	-1.04606	KO_1Way down vs WT_12mo	-1.17682	1.07547	-0.0649627	Aldh5a1	Aldh5a1	aldhehyde dehydrogenase family 5, subfamily A1	Aldh5a1	214579	214579	13 A3.1|13 10.77 cM	protein-coding	22.6441	22.6116	22.6766	-0.5σ	22.5296	22.8911	22.6076	22.645	22.7097	22.7086	22.573	22.6983	22.4882	22.5901
119	919	P16125	Ldhb	5	5	28.0457	28.0249	0.404418	1.01449	1.01449	KO_1Way up vs WT_12mo	-1.02358	1.05346	0.0207568	Ldhb	Ldhb	lactate dehydrogenase B	Ldhb	16832	16832	6 G2|6 74.17 cM	protein-coding	28.0353	28.0249	28.0457	+0.5σ	28.0066	28.0545	28.0545	27.9833	28.0257	27.9826	28.0834	28.0537	28.0252	28.0834
951	920	Q9CYR0	Ssbp1	5	5	20.5079	20.4169	0.404578	1.06512	1.06512	KO_1Way up vs WT_12mo	-1.10766	1.25662	0.0910167	Ssbp1	Ssbp1	single-stranded DNA binding protein 1	Ssbp1	381760	381760	6|6 B1	protein-coding	20.4624	20.4169	20.5079	+0.5σ	20.37	20.7108	20.3049	20.4209	20.2778	20.6546	20.64	20.5077	20.28	20.4572
1388	921	Q99M87	Dnaja3	5	5	18.2375	17.9951	0.405511	1.18293	1.18293	KO_1Way up vs WT_12mo	-1.31416	1.83893	0.242361	Dnaja3	Dnaja3	DnaJ heat shock protein family (Hsp40) member A3	Dnaja3	83945	83945	16 A1|16 2.46 cM	protein-coding	18.1163	17.9951	18.2375	+1σ	17.682	18.4205	17.555	17.9838	18.3343	18.9272	17.7784	18.1238	18.5179	17.8402
1972	922	F6XQY1	Carmil1	5	5	20.6195	20.4783	0.406567	1.10284	1.10284	KO_1Way up vs WT_12mo	-1.17327	1.42699	0.14122	Carmil1	Carmil1	capping protein regulator and myosin 1 linker 1	Carmil1	68732	68732	13|13 A3.1	protein-coding	20.5489	20.4783	20.6195	+0.5σ	20.8116	20.294	20.6254	19.9679	20.6924	20.7085	20.6338	20.493	20.7366	20.5254
91	923	P58252	Eef2	5	5	25.6238	25.6732	0.406713	0.96634	-1.03483	KO_1Way down vs WT_12mo	-1.13247	1.05752	-0.0493967	Eef2	Eef2	eukaryotic translation elongation factor 2	Eef2	13629	13629	10|10 C1	protein-coding	25.6485	25.6238	25.6732	-0.5σ	25.6671	25.6152	25.8701	25.6527	25.5611	25.6515	25.6398	25.6135	25.6655	25.5489
753	924	Q9D3D9	Atp5d	5	5	24.5965	24.6762	0.408258	0.946222	-1.05683	KO_1Way down vs WT_12mo	-1.22304	1.09504	-0.0797491	Atp5d	Atp5d	ATP synthase, H+ transporting, mitochondrial F1 complex, delta subunit	Atp5d	66043	66043	10|10 C1	protein-coding	24.6364	24.5965	24.6762	-0.5σ	24.4841	24.721	24.6409	24.9374	24.5977	24.7064	24.4415	24.683	24.639	24.5125
1400	925	O88712	Ctbp1	5	5	14.7438	14.6308	0.408416	1.08147	1.08147	KO_1Way up vs WT_12mo	-1.13736	1.33023	0.112995	Ctbp1	Ctbp1	C-terminal binding protein 1	Ctbp1	13016	13016	5 B1|5 17.52 cM	protein-coding	14.6873	14.6308	14.7438	+0.5σ	14.4922	14.5698	14.4423	14.6509	14.9989	14.8052	14.8463	14.9606	14.4925	14.6145
193	926	Q9DC69	Ndufa9	5	5	26.3751	26.3402	0.408976	1.02446	1.02446	KO_1Way up vs WT_12mo	-1.04059	1.09211	0.0348596	Ndufa9	Ndufa9	NADH:ubiquinone oxidoreductase subunit A9	Ndufa9	66108	66108	6|6 F3	protein-coding	26.3576	26.3402	26.3751	+0.5σ	26.4395	26.3685	26.3046	26.3567	26.2319	26.3676	26.3269	26.3995	26.3428	26.4388
580	927	P35979	Rpl12	5	5	22.1311	22.2383	0.409367	0.928333	-1.0772	KO_1Way down vs WT_12mo	-1.31174	1.13046	-0.107285	Rpl12	Rpl12	ribosomal protein L12	Rpl12	269261	269261	2|2 B	protein-coding	22.1847	22.1311	22.2383	-0.5σ	22.1793	22.4543	22.2305	22.2365	22.0911	22.2126	21.7045	22.2393	22.2916	22.2072
1171	928	Q99N96	Mrpl1	5	5	17.3941	17.2481	0.409494	1.10651	1.10651	KO_1Way up vs WT_12mo	-1.18171	1.44683	0.14601	Mrpl1	Mrpl1	mitochondrial ribosomal protein L1	Mrpl1	94061	94061	5|5 E3	protein-coding	17.3211	17.2481	17.3941	+0.5σ	17.2269	16.9118	17.5941	17.555	16.9526	17.2617	17.5946	17.1554	17.5766	17.3821
44	929	E9Q557	Dsp	5	5	25.8162	25.9525	0.4097	0.909839	-1.0991	KO_1Way down vs WT_12mo	-1.41194	1.16882	-0.136317	Dsp	Dsp	desmoplakin	Dsp	109620	109620	13|13 A3.3	protein-coding	25.8844	25.8162	25.9525	-0.5σ	25.9952	25.8981	25.9306	25.9433	25.9952	26.1023	25.2113	25.8827	25.9423	25.9423
33	930	Q9WUB3	Pygm	5	5	28.2528	28.2919	0.409752	0.973248	-1.02749	KO_1Way down vs WT_12mo	-1.10407	1.04579	-0.0391203	Pygm	Pygm	muscle glycogen phosphorylase	Pygm	19309	19309	19 A|19 4.53 cM	protein-coding	28.2723	28.2528	28.2919	-0.5σ	28.2075	28.3064	28.432	28.2075	28.3064	28.207	28.3058	28.2485	28.2762	28.2265
1392	931	Q9Z1Z0	Uso1	5	5	19.1611	19.2366	0.411056	0.948968	-1.05378	KO_1Way down vs WT_12mo	-1.21125	1.09078	-0.0755682	Uso1	Uso1	USO1 vesicle docking factor	Uso1	56041	56041	5|5 E2	protein-coding	19.1989	19.1611	19.2366	-0.5σ	19.0331	19.383	19.3131	19.3082	19.1458	19.1115	19.3308	19.0443	19.271	19.0478
1025	932	Q9D1M0	Sec13	5	5	20.1075	20.0255	0.412017	1.05849	1.05849	KO_1Way up vs WT_12mo	-1.09925	1.23161	0.0820118	Sec13	Sec13	SEC13 homolog, nuclear pore and COPII coat complex component	Sec13	110379	110379	6 E3|6 52.84 cM	protein-coding	20.0665	20.0255	20.1075	+0.5σ	20.1821	20.062	20.0521	20.1193	19.712	20.1103	20.1653	20.2261	19.9388	20.097
779	933	Q60994	Adipoq	5	5	23.289	23.4343	0.412637	0.904153	-1.10601	KO_1Way down vs WT_12mo	-1.44717	1.18305	-0.145361	Adipoq	Adipoq	adiponectin, C1Q and collagen domain containing	Adipoq	11450	11450	16 B1|16 13.96 cM	protein-coding	23.3617	23.289	23.4343	-0.5σ	23.6596	23.2868	23.2807	23.4976	23.447	23.3868	22.6909	23.3782	23.4399	23.549
545	934	P35385	Hspb7	5	5	22.5825	22.6737	0.412907	0.93873	-1.06527	KO_1Way down vs WT_12mo	-1.26117	1.11136	-0.0912173	Hspb7	Hspb7	heat shock protein family, member 7 (cardiovascular)	Hspb7	29818	29818	4|4 D3	protein-coding	22.6281	22.5825	22.6737	-0.5σ	22.3	22.7737	22.7504	22.7208	22.8238	22.5218	22.6131	22.7131	22.6222	22.4425
683	935	O35215	Ddt	5	5	23.5449	23.4639	0.413805	1.05777	1.05777	KO_1Way up vs WT_12mo	-1.09867	1.22928	0.0810298	Ddt	Ddt	D-dopachrome tautomerase	Ddt	13202	13202	10 C1|10 38.58 cM	protein-coding	23.5044	23.4639	23.5449	+0.5σ	23.3312	23.711	23.4606	23.341	23.4757	23.33	23.4961	23.549	23.6586	23.691
1884	936	E9Q3T0	Gm10073	5	5	18.8262	18.9061	0.414027	0.946112	-1.05696	KO_1Way down vs WT_12mo	-1.22589	1.09733	-0.0799177	Gm10073	Gm10073	ribosomal protein, large, P1 pseudogene	Gm10073	100042734	100042734	8|8 D3	pseudo	18.8662	18.8262	18.9061	-0.5σ	18.6829	18.8409	18.8775	19.1564	18.9728	18.931	18.7103	18.7688	18.9606	18.7603
1959	937	O54946	Dnajb6	5	5	17.8738	17.6991	0.41664	1.12873	1.12873	KO_1Way up vs WT_12mo	-1.22744	1.56378	0.174695	Dnajb6	Dnajb6	DnaJ heat shock protein family (Hsp40) member B6	Dnajb6	23950	23950	5|5 B1	protein-coding	17.7864	17.6991	17.8738	+0.5σ	17.717	18.0917	17.795	17.4524	17.4392	17.4322	17.8657	18.4354	17.9257	17.71
1637	938	P14131	Rps16	5	5	20.7866	20.8736	0.416977	0.94143	-1.06221	KO_1Way down vs WT_12mo	-1.24979	1.10768	-0.0870739	Rps16	Rps16	ribosomal protein S16	Rps16	20055	20055	7|7 A3	protein-coding	20.8301	20.7866	20.8736	-0.5σ	21.1534	20.932	20.7997	20.7952	20.6878	20.6662	20.9137	20.606	20.8944	20.8525
804	939	Q61599	Arhgdib	5	5	20.0877	20.2168	0.420041	0.914431	-1.09358	KO_1Way down vs WT_12mo	-1.39395	1.1656	-0.129054	Arhgdib	Arhgdib	Rho, GDP dissociation inhibitor (GDI) beta	Arhgdib	11857	11857	6|6 G1	protein-coding	20.1522	20.0877	20.2168	-0.5σ	20.1521	20.0242	20.299	20.1875	20.4209	20.1432	20.3315	19.8112	19.7362	20.4163
1193	940	A0A087WPD1	Rgs6	5	5	19.2105	19.0514	0.420121	1.11659	1.11659	KO_1Way up vs WT_12mo	-1.20799	1.50608	0.159096	Rgs6	Rgs6	regulator of G-protein signaling 6	Rgs6	50779	50779	12 D1|12 38.14 cM	protein-coding	19.1309	19.0514	19.2105	+0.5σ	18.9301	19.079	19.2565	19.0148	18.9767	19.3769	18.4982	19.4061	19.3553	19.4161
1241	941	P58389	Ptpa	5	5	16.7661	16.5073	0.420527	1.19655	1.19655	KO_1Way up vs WT_12mo	-1.36059	1.94801	0.258885	Ptpa	Ptpa	protein phosphatase 2 protein activator	Ptpa	110854	110854	2 B|2 21.71 cM	protein-coding	16.6367	16.5073	16.7661	+1σ	16.454	16.7099	16.8367	16.4809	16.0549	15.6842	17.0724	16.8764	17.0562	17.1415
284	942	E9QPE7	Myh11	5	5	16.324	16.0959	0.422072	1.17128	1.17128	KO_1Way up vs WT_12mo	-1.31361	1.80214	0.228086	Myh11	Myh11	myosin, heavy polypeptide 11, smooth muscle	Myh11	17880	17880	16 A1|16 9.71 cM	protein-coding	16.2099	16.0959	16.324	+1σ	15.5733	16.0982	16.2888	15.657	16.8621	15.9145	16.4658	16.6585	16.1153	16.4658
1501	943	Q9JJV2	Pfn2	5	5	19.3686	19.472	0.422371	0.93087	-1.07426	KO_1Way down vs WT_12mo	-1.30605	1.13171	-0.103349	Pfn2	Pfn2	profilin 2	Pfn2	18645	18645	3 D|3 28.15 cM	protein-coding	19.4203	19.3686	19.472	-0.5σ	19.4653	19.5794	19.1764	19.5794	19.5595	19.5268	19.4061	19.5329	19.3653	19.012
688	944	Q00519	Xdh	5	5	20.0663	20.0067	0.422635	1.04216	1.04216	KO_1Way up vs WT_12mo	-1.074	1.16646	0.0595743	Xdh	Xdh	xanthine dehydrogenase	Xdh	22436	22436	17 E2|17 45.25 cM	protein-coding	20.0365	20.0067	20.0663	+0.5σ	19.9814	19.8937	20.1771	19.9365	20.0449	20.1573	20.1466	19.8786	20.0584	20.0905
700	945	Q91WP6	Serpina3n	5	5	17.8147	17.6014	0.424016	1.15939	1.15939	KO_1Way up vs WT_12mo	-1.29297	1.73801	0.21337	Serpina3n	Serpina3n	serine (or cysteine) peptidase inhibitor, clade A, member 3N	Serpina3n	20716	20716	12|12 E	protein-coding	17.7081	17.6014	17.8147	+1σ	17.7658	17.1803	17.7424	17.5467	17.7716	17.6068	17.4244	18.6837	17.5386	17.8201
1150	946	Q9QZ88	Vps29	5	5	21.0341	20.9705	0.42432	1.0451	1.0451	KO_1Way up vs WT_12mo	-1.07974	1.17933	0.0636416	Vps29	Vps29	VPS29 retromer complex component	Vps29	56433	56433	5|5 F	protein-coding	21.0023	20.9705	21.0341	+0.5σ	21.1285	21.0913	20.9967	20.7862	20.8497	21.0144	21.1741	21.0144	20.9882	20.9795
423	947	P03921	ND5	5	5	23.0879	23.1613	0.425698	0.95044	-1.05214	KO_1Way down vs WT_12mo	-1.20985	1.0929	-0.0733323	ND5	ND5	NADH dehydrogenase subunit 5	mt-Nd5	17721	17721	-	protein-coding	23.1246	23.0879	23.1613	-0.5σ	23.1492	23.2986	23.1717	23.2084	22.9784	23.291	23.0871	22.8532	23.1272	23.0812
1858	948	Q9ESW4	Agk	5	5	17.2612	17.4449	0.426186	0.880435	-1.1358	KO_1Way down vs WT_12mo	-1.61222	1.24974	-0.183711	Agk	Agk	acylglycerol kinase	Agk	69923	69923	6|6 B1	protein-coding	17.353	17.2612	17.4449	-1σ	17.3885	17.0961	17.9905	16.9021	17.8472	17.4244	17.0562	17.2274	17.2329	17.3649
247	949	Q9CQ73	Pkp2	5	5	23.3838	23.4219	0.427118	0.973963	-1.02673	KO_1Way down vs WT_12mo	-1.10418	1.04743	-0.0380609	Pkp2	Pkp2	plakophilin 2	Pkp2	67451	67451	16|16 A2	protein-coding	23.4029	23.3838	23.4219	-0.5σ	23.4417	23.4168	23.3881	23.3735	23.4893	23.3518	23.2712	23.4461	23.3477	23.5024
1976	950	Q5SSF7	Tent5c	5	5	17.917	17.7199	0.427401	1.14635	1.14635	KO_1Way up vs WT_12mo	-1.27144	1.67083	0.19705	Tent5c	Tent5c	terminal nucleotidyltransferase 5C	Tent5c	74645	74645	3|3 F2.2	protein-coding	17.8184	17.7199	17.917	+1σ	18.2717	17.9905	17.1803	17.4238	17.7335	17.4723	18.0799	18.1599	17.749	18.1238
1045	951	Q9Z1J3	Nfs1	5	5	18.8814	18.6634	0.427424	1.16312	1.16312	KO_1Way up vs WT_12mo	-1.30436	1.76461	0.218003	Nfs1	Nfs1	nitrogen fixation gene 1 (S. cerevisiae)	Nfs1	18041	18041	2|2 H1	protein-coding	18.7724	18.6634	18.8814	+1σ	19.2941	18.654	18.6682	18.6905	18.0103	19.0346	18.8751	18.2552	19.0752	19.1671
1381	952	P48024	Eif1	5	5	21.8463	21.7897	0.427599	1.04002	1.04002	KO_1Way up vs WT_12mo	-1.07148	1.15896	0.056613	Eif1	Eif1	eukaryotic translation initiation factor 1	Eif1	20918	20918	11|11 D	protein-coding	21.818	21.7897	21.8463	+0.5σ	21.6014	21.8588	21.7016	21.8731	21.9137	21.9319	21.7708	21.8175	21.7948	21.9167
1774	953	F6Q8A4	Rps6ka1	5	5	18.1664	17.9556	0.429816	1.15736	1.15736	KO_1Way up vs WT_12mo	-1.29584	1.73576	0.210838	Rps6ka1	Rps6ka1	ribosomal protein S6 kinase polypeptide 1	Rps6ka1	20111	20111	4|4 D2.3	protein-coding	18.061	17.9556	18.1664	+1σ	17.5025	18.3629	17.5253	18.1474	18.2398	18.2025	17.5198	18.5656	18.3464	18.1978
782	954	Q9DBB8	Dhdh	5	5	20.0961	20.1784	0.430286	0.944599	-1.05865	KO_1Way down vs WT_12mo	-1.24014	1.10654	-0.0822255	Dhdh	Dhdh	dihydrodiol dehydrogenase (dimeric)	Dhdh	71755	71755	7 B3|7 29.32 cM	protein-coding	20.1373	20.0961	20.1784	-0.5σ	20.1951	20.0501	20.3209	20.0049	20.3209	19.9951	20.1279	20.3231	20.1466	19.888
162	955	A8DUK4	Hbb-bs	5	5	28.7297	28.5304	0.430397	1.14807	1.14807	KO_1Way up vs WT_12mo	-1.2781	1.68461	0.19921	Hbb-bs	Hbb-bs	hemoglobin, beta adult s chain	Hbb-bs	100503605	100503605	7 E3|7	protein-coding	28.6301	28.5304	28.7297	+1σ	28.9324	28.7371	28.1227	28.3371	28.5229	29.001	29.2596	28.1219	28.6187	28.6471
1873	956	Q80TB8	Vat1l	5	5	24.9496	25.0289	0.430518	0.946527	-1.05649	KO_1Way down vs WT_12mo	-1.23073	1.10263	-0.0792837	Vat1l	Vat1l	vesicle amine transport protein 1 like	Vat1l	270097	270097	8|8 E1	protein-coding	24.9892	24.9496	25.0289	-0.5σ	25.1608	25.2842	24.8677	25.0434	24.7882	24.9044	25.0523	24.9668	24.9122	24.9122
987	957	P63024	Vamp3	5	5	19.5482	19.6512	0.430557	0.931051	-1.07405	KO_1Way down vs WT_12mo	-1.30984	1.13544	-0.103067	Vamp3	Vamp3	vesicle-associated membrane protein 3	Vamp3	22319	22319	4|4 E2	protein-coding	19.5997	19.5482	19.6512	-0.5σ	19.8801	19.8092	19.4316	19.7353	19.4001	19.5036	19.7406	19.7082	19.3769	19.4116
890	958	P47962	Rpl5	5	5	22.5878	22.4966	0.431072	1.06522	1.06522	KO_1Way up vs WT_12mo	-1.11913	1.26987	0.0911572	Rpl5	Rpl5	ribosomal protein L5	Rpl5	100503670	100503670	5 F|5 52.23 cM	protein-coding	22.5422	22.4966	22.5878	+0.5σ	22.6408	22.6926	22.4672	22.5188	22.1638	22.7782	22.4067	22.6131	22.5777	22.5633
1248	959	B2C3G8	Stat5a	5	5	18.7629	18.6082	0.432048	1.11321	1.11321	KO_1Way up vs WT_12mo	-1.21129	1.50107	0.154723	Stat5a	Stat5a	signal transducer and activator of transcription 5A	Stat5a	20850	20850	11 D|11 63.77 cM	protein-coding	18.6855	18.6082	18.7629	+0.5σ	19.1613	18.4295	18.5722	18.3012	18.5766	18.884	18.7147	18.9935	18.3383	18.884
1827	960	F6RSK3	Gm17430	5	5	20.2278	20.2957	0.432186	0.954039	-1.04818	KO_1Way down vs WT_12mo	-1.19511	1.08778	-0.0678799	Gm17430	Gm17430	60S ribosomal protein L24 pseudogene	Gm17430	115488911	115488911	18 4.91 cM	pseudo	20.2617	20.2278	20.2957	-0.5σ	20.4347	20.2064	20.3978	20.2199	20.2199	20.428	20.1846	20.022	20.2522	20.2522
131	961	P08249	Mdh2	5	5	29.8397	29.7961	0.432437	1.03067	1.03067	KO_1Way up vs WT_12mo	-1.05556	1.12131	0.0435881	Mdh2	Mdh2	malate dehydrogenase 2, NAD (mitochondrial)	Mdh2	17448	17448	5 G2|5 75.4 cM	protein-coding	29.8179	29.7961	29.8397	+0.5σ	29.7154	29.7154	29.8499	29.8499	29.8499	29.7842	29.7842	29.8495	29.9964	29.7842
552	962	J3QN31	Adssl1	5	5	22.3125	22.2362	0.433078	1.05432	1.05432	KO_1Way up vs WT_12mo	-1.09953	1.22222	0.0763076	Adssl1	Adssl1	adenylosuccinate synthetase like 1	Adssl1	11565	11565	12|12 F1	protein-coding	22.2743	22.2362	22.3125	+0.5σ	22.4614	22.1414	22.1296	22.1223	22.3262	22.4917	22.4257	22.2543	22.1562	22.2345
145	963	Q91VA7	Idh3b	5	5	26.9247	26.963	0.433538	0.973778	-1.02693	KO_1Way down vs WT_12mo	-1.10615	1.0489	-0.0383349	Idh3b	Idh3b	isocitrate dehydrogenase 3 (NAD+) beta	Idh3b	170718	170718	2|2 F1	protein-coding	26.9439	26.9247	26.963	-0.5σ	26.8671	26.9783	26.9582	27.0533	26.9582	27.0243	26.8424	26.9571	26.9571	26.8424
860	964	Q8K310	Matr3	5	5	21.0989	21.0634	0.434324	1.02494	1.02494	KO_1Way up vs WT_12mo	-1.04538	1.09818	0.0355391	Matr3	Matr3	matrin 3	Matr3	17184	17184	18 B2|18 19.14 cM	protein-coding	21.0812	21.0634	21.0989	+0.5σ	21.1239	21.0564	21.0913	21.1374	20.9078	21.1009	21.0664	21.0753	21.1302	21.1216
212	965	P00405	COX2	5	5	27.0615	27.0061	0.434563	1.03915	1.03915	KO_1Way up vs WT_12mo	-1.0717	1.15724	0.0553979	COX2	COX2	cytochrome c oxidase subunit II	mt-Co2	17709	17709	-	protein-coding	27.0338	27.0061	27.0615	+0.5σ	26.8995	26.9918	27.1689	26.9918	26.9783	26.9913	27.1994	27.0702	27.1343	26.9121
386	966	O88322	Nid2	5	5	22.9194	23.1293	0.435185	0.864594	-1.15661	KO_1Way down vs WT_12mo	-1.74008	1.30075	-0.209905	Nid2	Nid2	nidogen 2	Nid2	18074	18074	14|14 A3	protein-coding	23.0243	22.9194	23.1293	-1σ	23.3529	23.5919	22.9552	22.9731	22.7737	22.5981	23.1704	22.3736	23.549	22.906
900	967	Q6P3A8	Bckdhb	5	5	20.6542	20.5584	0.436021	1.0687	1.0687	KO_1Way up vs WT_12mo	-1.12798	1.28827	0.0958506	Bckdhb	Bckdhb	branched chain ketoacid dehydrogenase E1, beta polypeptide	Bckdhb	12040	12040	9|9 E2	protein-coding	20.6063	20.5584	20.6542	+0.5σ	20.3086	20.8678	20.4132	20.6682	20.5341	20.5554	20.7331	20.5154	20.8633	20.6039
977	968	Q9ERK4	Cse1l	5	5	16.79	16.8602	0.438117	0.952528	-1.04984	KO_1Way down vs WT_12mo	-1.20452	1.09287	-0.070166	Cse1l	Cse1l	chromosome segregation 1-like (S. cerevisiae)	Cse1l	110750	110750	2 H3|2 87.22 cM	protein-coding	16.8251	16.79	16.8602	-0.5σ	16.6869	16.7658	17.084	16.8621	16.9021	16.825	16.7106	16.9797	16.6786	16.756
843	969	Q9D0E1	Hnrnpm	5	5	21.6397	21.5746	0.438286	1.04614	1.04614	KO_1Way up vs WT_12mo	-1.08591	1.18844	0.0650808	Hnrnpm	Hnrnpm	heterogeneous nuclear ribonucleoprotein M	Hnrnpm	76936	76936	17|17 B1	protein-coding	21.6072	21.5746	21.6397	+0.5σ	21.609	21.4599	21.4877	21.7313	21.5852	21.8663	21.6471	21.5261	21.6471	21.5117
1854	970	Q8K215	Lyrm4	5	5	18.3868	18.4934	0.438796	0.928757	-1.07671	KO_1Way down vs WT_12mo	-1.32723	1.14485	-0.106626	Lyrm4	Lyrm4	LYR motif containing 4	Lyrm4	380840	380840	13|13 A3.3	protein-coding	18.4401	18.3868	18.4934	-0.5σ	18.4066	18.7594	18.1785	18.5123	18.6104	18.1035	18.4515	18.4643	18.6164	18.2983
730	971	Q9WTP7	Ak3	5	5	21.7088	21.6557	0.440043	1.03752	1.03752	KO_1Way up vs WT_12mo	-1.07006	1.15187	0.0531431	Ak3	Ak3	adenylate kinase 3	Ak3	56248	56248	19|19 C1	protein-coding	21.6822	21.6557	21.7088	+0.5σ	21.5435	21.8152	21.7543	21.593	21.5725	21.5976	21.7179	21.7489	21.8139	21.6659
655	972	P29268	Ccn2	5	5	22.4916	22.2294	0.440075	1.19936	1.19936	KO_1Way up vs WT_12mo	-1.39687	2.00935	0.262266	Ccn2	Ccn2	cellular communication network factor 2	Ccn2	14219	14219	10 A4|10 11.84 cM	protein-coding	22.3605	22.2294	22.4916	+1σ	22.7453	22.811	22.3785	21.8152	21.3968	22.3389	23.1212	22.093	22.3775	22.5277
1887	973	Q00493	Cpe	5	5	17.4985	17.3347	0.440306	1.12016	1.12016	KO_1Way up vs WT_12mo	-1.2322	1.54611	0.163707	Cpe	Cpe	carboxypeptidase E	Cpe	12876	12876	8 B3.1|8 32.3 cM	protein-coding	17.4166	17.3347	17.4985	+0.5σ	17.238	17.6675	16.9021	17.3111	17.555	17.6329	17.312	17.7668	16.9976	17.783
334	974	P29699	Ahsg	5	5	22.4689	22.4044	0.441573	1.04575	1.04575	KO_1Way up vs WT_12mo	-1.0862	1.18786	0.0645384	Ahsg	Ahsg	alpha-2-HS-glycoprotein	Ahsg	11625	11625	16 B1|16 13.74 cM	protein-coding	22.4367	22.4044	22.4689	+0.5σ	22.5542	22.5084	22.4317	22.3915	22.1364	22.5075	22.37	22.4384	22.5633	22.4656
834	975	Q9WV55	Vapa	5	5	22.4152	22.2575	0.442914	1.11556	1.11556	KO_1Way up vs WT_12mo	-1.22517	1.5247	0.157773	Vapa	Vapa	vesicle-associated membrane protein, associated protein A	Vapa	30960	30960	17|17 E1.1	protein-coding	22.3363	22.2575	22.4152	+0.5σ	21.7968	22.4927	22.1682	22.1793	22.6504	22.6909	21.9583	22.3291	22.5403	22.5576
628	976	P10107	Anxa1	5	5	21.6323	21.5413	0.443547	1.06513	1.06513	KO_1Way up vs WT_12mo	-1.12459	1.27584	0.0910229	Anxa1	Anxa1	annexin A1	Anxa1	16952	16952	19 B|19 13.83 cM	protein-coding	21.5868	21.5413	21.6323	+0.5σ	21.3441	21.5779	21.72	21.4553	21.609	21.2869	21.8056	21.6109	21.6942	21.7638
1042	977	Q80YQ1	Thbs1	5	5	19.6167	19.4492	0.443557	1.12312	1.12312	KO_1Way up vs WT_12mo	-1.24123	1.56568	0.167511	Thbs1	Thbs1	thrombospondin 1	Thbs1	21825	21825	2 E5|2 59.34 cM	protein-coding	19.5329	19.4492	19.6167	+0.5σ	19.3025	19.4001	19.7866	19.4274	19.3295	19.6378	19.6006	19.5398	19.0602	20.2452
155	978	Q61425	Hadh	5	5	24.9	24.9828	0.443862	0.944232	-1.05906	KO_1Way down vs WT_12mo	-1.24817	1.11284	-0.0827865	Hadh	Hadh	hydroxyacyl-Coenzyme A dehydrogenase	Hadh	15107	15107	3|3 G3	protein-coding	24.9414	24.9	24.9828	-0.5σ	24.8082	24.8845	24.9842	25.3316	24.9054	24.8943	24.8829	24.7681	25.0603	24.8943
1560	979	P22907	Hmbs	5	5	15.436	15.3308	0.444239	1.07566	1.07566	KO_1Way up vs WT_12mo	-1.14575	1.32567	0.105216	Hmbs	Hmbs	hydroxymethylbilane synthase	Hmbs	15288	15288	9 A5.2|9 24.84 cM	protein-coding	15.3834	15.3308	15.436	+0.5σ	15.033	15.1257	15.7094	15.3767	15.4091	15.4991	15.3343	15.44	15.3038	15.6027
339	980	Q08857	Cd36	5	5	25.0071	25.089	0.444824	0.944834	-1.05839	KO_1Way down vs WT_12mo	-1.24555	1.11192	-0.0818677	Cd36	Cd36	CD36 molecule	Cd36	12491	12491	5 A3|5 8.11 cM	protein-coding	25.048	25.0071	25.089	-0.5σ	25.1789	25.1059	25.0928	24.8544	25.2128	25.0284	24.7866	24.8829	25.0911	25.2464
1367	981	A0A1B0GS58	Glrx3	5	5	18.9501	19.0982	0.446078	0.902437	-1.10811	KO_1Way down vs WT_12mo	-1.48894	1.21258	-0.148102	Glrx3	Glrx3	glutaredoxin 3	Glrx3	30926	30926	7|7 F4	protein-coding	19.0241	18.9501	19.0982	-0.5σ	19.4596	18.7677	18.7325	19.4149	19.1162	18.9351	18.6739	18.8548	18.9873	19.2993
438	982	P97449	Anpep	5	5	21.4091	21.3366	0.446299	1.05153	1.05153	KO_1Way up vs WT_12mo	-1.09902	1.2152	0.0724891	Anpep	Anpep	alanyl (membrane) aminopeptidase	Anpep	16790	16790	7|7 D2	protein-coding	21.3728	21.3366	21.4091	+0.5σ	21.3823	21.0122	21.4004	21.4442	21.4442	21.3889	21.3034	21.3604	21.49	21.5029
633	983	P09405	Ncl	5	5	22.1268	22.0698	0.44687	1.04031	1.04031	KO_1Way up vs WT_12mo	-1.07724	1.16583	0.057009	Ncl	Ncl	nucleolin	Ncl	17975	17975	1 C5|1 43.94 cM	protein-coding	22.0983	22.0698	22.1268	+0.5σ	21.8631	22.1254	22.1254	22.0201	22.2148	22.1344	22.0484	22.2072	22.0312	22.2126
1049	984	Q3U9G9	Lbr	5	5	19.5798	19.4494	0.447955	1.09463	1.09463	KO_1Way up vs WT_12mo	-1.18637	1.42153	0.130448	Lbr	Lbr	lamin B receptor	Lbr	98386	98386	1 H5|1 84.89 cM	protein-coding	19.5146	19.4494	19.5798	+0.5σ	19.4001	19.185	19.3443	19.7866	19.5308	19.5398	19.4015	19.4393	19.4327	20.0858
1164	985	Q922D8	Mthfd1	5	5	18.5791	18.4959	0.44942	1.05934	1.05934	KO_1Way up vs WT_12mo	-1.11574	1.25209	0.0831691	Mthfd1	Mthfd1	methylenetetrahydrofolate dehydrogenase (NADP+ dependent), methenyltetrahydrofolate cyclohydrolase, formyltetrahydrofolate synthase	Mthfd1	108156	108156	12|12 C3	protein-coding	18.5375	18.4959	18.5791	+0.5σ	18.4024	18.3012	18.7095	18.4295	18.637	18.8466	18.5531	18.5776	18.4828	18.4354
1405	986	Q6ZWN5	Rps9	5	5	22.3181	22.359	0.449521	0.972084	-1.02872	KO_1Way down vs WT_12mo	-1.11676	1.05528	-0.0408476	Rps9	Rps9	ribosomal protein S9	Rps9	76846	76846	7|7 A1	protein-coding	22.3386	22.3181	22.359	-0.5σ	22.3711	22.3304	22.2817	22.4439	22.3677	22.4218	22.3126	22.1773	22.3988	22.2801
1459	987	P16110	Lgals3	5	5	20.6104	20.219	0.449945	1.31159	1.31159	KO_1Way up vs WT_12mo	-1.6757	2.88264	0.391314	Lgals3	Lgals3	lectin, galactose binding, soluble 3	Lgals3	16854	16854	14|14 C1	protein-coding	20.4147	20.219	20.6104	+2σ	21.9076	20.6076	19.4044	19.9226	19.253	20.6338	20.902	20.4864	20.3598	20.6698
150	988	Q5FW53	Mybphl	5	5	25.9003	25.8602	0.449985	1.02818	1.02818	KO_1Way up vs WT_12mo	-1.05433	1.11459	0.0400964	Mybphl	Mybphl	myosin binding protein H-like	Mybphl	68753	68753	3|3 F3	protein-coding	25.8803	25.8602	25.9003	+0.5σ	25.8701	25.9557	25.8304	25.9143	25.7305	25.9781	25.9127	25.9546	25.8005	25.8556
1321	989	O35593	Psmd14	5	5	17.7217	17.6371	0.450379	1.06035	1.06035	KO_1Way up vs WT_12mo	-1.11818	1.25722	0.0845441	Psmd14	Psmd14	proteasome (prosome, macropain) 26S subunit, non-ATPase, 14	Psmd14	59029	59029	2|2 C1.3	protein-coding	17.6794	17.6371	17.7217	+0.5σ	17.6242	17.682	17.5467	17.795	17.5377	17.3988	17.6168	17.8082	17.9144	17.8701
685	990	P00397	COX1	5	5	24.3081	24.234	0.45042	1.05273	1.05273	KO_1Way up vs WT_12mo	-1.10293	1.22232	0.0741398	COX1	COX1	cytochrome c oxidase subunit I	mt-Co1	17708	17708	-	protein-coding	24.271	24.234	24.3081	+0.5σ	23.9815	24.2714	24.2633	24.3269	24.3269	24.1852	24.2471	24.4818	24.4587	24.1679
703	991	Q91V64	Isoc1	5	5	22.0195	21.9846	0.450523	1.02447	1.02447	KO_1Way up vs WT_12mo	-1.04718	1.09906	0.0348773	Isoc1	Isoc1	isochorismatase domain containing 1	Isoc1	66307	66307	18 D3|18	protein-coding	22.0021	21.9846	22.0195	+0.5σ	21.8787	22.0137	22.0974	21.9339	21.9993	21.9689	22.0236	22.1043	22.0178	21.9827
336	992	A0A0R4J275	Ndufa12	5	5	25.4924	25.4554	0.45135	1.02598	1.02598	KO_1Way up vs WT_12mo	-1.05028	1.10556	0.0370041	Ndufa12	Ndufa12	NADH:ubiquinone oxidoreductase subunit A12	Ndufa12	66414	66414	10|10 C2	protein-coding	25.4739	25.4554	25.4924	+0.5σ	25.5611	25.5128	25.3234	25.5	25.3799	25.5249	25.4608	25.491	25.5249	25.4608
134	993	Q3UIZ8	Mylk3	5	5	24.3572	24.3107	0.451497	1.03272	1.03272	KO_1Way up vs WT_12mo	-1.06355	1.13429	0.0464495	Mylk3	Mylk3	myosin light chain kinase 3	Mylk3	213435	213435	8|8 C3	protein-coding	24.334	24.3107	24.3572	+0.5σ	24.2714	24.4337	24.4151	24.1621	24.2714	24.2916	24.3906	24.2793	24.4201	24.4043
2009	994	Q3U367	Aldh9a1	5	5	18.386	18.52	0.451835	0.911329	-1.0973	KO_1Way down vs WT_12mo	-1.43849	1.19469	-0.133957	Aldh9a1	Aldh9a1	aldehyde dehydrogenase 9, subfamily A1	Aldh9a1	56752	56752	1|1 H2.3	protein-coding	18.453	18.386	18.52	-0.5σ	18.2597	18.755	18.6963	18.5722	18.3165	18.4643	18.302	17.897	18.6554	18.6113
159	995	A0A0A0MQA5	Tuba4a	5	5	24.7723	24.7329	0.451903	1.02765	1.02765	KO_1Way up vs WT_12mo	-1.05366	1.11274	0.0393538	Tuba4a	Tuba4a	tubulin, alpha 4A	Tuba4a	22145	22145	1|1 C4	protein-coding	24.7526	24.7329	24.7723	+0.5σ	24.822	24.6195	24.7693	24.6846	24.7693	24.683	24.8355	24.7191	24.8659	24.758
1081	996	Q6PD03	Ppp2r5a	5	5	22.2076	22.1222	0.451928	1.06101	1.06101	KO_1Way up vs WT_12mo	-1.12018	1.26103	0.0854363	Ppp2r5a	Ppp2r5a	protein phosphatase 2, regulatory subunit B', alpha	Ppp2r5a	226849	226849	1|1 H6	protein-coding	22.1649	22.1222	22.2076	+0.5σ	22.0346	22.1844	22.1991	22.0137	22.1793	22.5576	22.1244	22.244	21.9457	22.1666
2007	997	A0A140LHG8	Spcs2	5	5	17.1447	16.8119	0.451944	1.25948	1.25948	KO_1Way up vs WT_12mo	-1.55605	2.46835	0.332828	Spcs2	Spcs2	signal peptidase complex subunit 2 homolog (S. cerevisiae)	Spcs2	66624	66624	7|7 E1	protein-coding	16.9783	16.8119	17.1447	+1σ	16.0236	16.5721	16.6167	18.0103	16.8367	16.8374	16.7664	16.6874	17.335	18.0972
182	998	Q8K0E8	Fgb	5	5	24.8971	24.7703	0.453173	1.09187	1.09187	KO_1Way up vs WT_12mo	-1.18432	1.41192	0.126797	Fgb	Fgb	fibrinogen beta chain	Fgb	110135	110135	3 E3|3 36.98 cM	protein-coding	24.8337	24.7703	24.8971	+0.5σ	24.5594	24.5261	24.6961	24.8677	25.2024	24.5708	25.0603	25.1297	24.758	24.9668
901	999	A0A1Y7VM38	Ndufs6	5	5	22.059	22.1608	0.45395	0.931865	-1.07312	KO_1Way down vs WT_12mo	-1.3196	1.14591	-0.101807	Ndufs6	Ndufs6	NADH:ubiquinone oxidoreductase core subunit S6	Ndufs6	407785	407785	13|13 C1	protein-coding	22.1099	22.059	22.1608	-0.5σ	22.194	22.0941	22.0648	22.5114	21.9397	22.1444	21.9689	22.3514	21.9689	21.8613
153	1000	P29758	Oat	5	5	24.7568	24.8039	0.454202	0.967891	-1.03317	KO_1Way down vs WT_12mo	-1.13691	1.06507	-0.0470831	Oat	Oat	ornithine aminotransferase	Oat	18242	18242	7 F3|7 76.3 cM	protein-coding	24.7803	24.7568	24.8039	-0.5σ	24.6409	24.9054	24.9054	24.8082	24.7595	24.7339	24.8659	24.7339	24.6637	24.7866
1865	1001	Q9JKF7	Mrpl39	5	5	17.9267	17.8221	0.455264	1.07518	1.07518	KO_1Way up vs WT_12mo	-1.15091	1.33047	0.104581	Mrpl39	Mrpl39	mitochondrial ribosomal protein L39	Mrpl39	27393	27393	16|16 C3.3	protein-coding	17.8744	17.8221	17.9267	+0.5σ	18.1749	17.7424	17.682	17.697	17.8144	17.5831	18.1428	17.9308	17.897	18.0799
1287	1002	P50543	S100a11	5	5	17.5029	17.5879	0.45565	0.94282	-1.06065	KO_1Way down vs WT_12mo	-1.26122	1.12111	-0.0849464	S100a11	S100a11	S100 calcium binding protein A11	S100a11	20195	20195	3|3 F2.1	protein-coding	17.5454	17.5029	17.5879	-0.5σ	17.5313	17.3816	17.8397	17.6613	17.5253	17.2329	17.4723	17.526	17.683	17.6004
406	1003	P51885	Lum	5	5	25.0672	24.9869	0.455921	1.05725	1.05725	KO_1Way up vs WT_12mo	-1.11425	1.24548	0.0803139	Lum	Lum	lumican	Lum	17022	17022	10 C3|10 50.32 cM	protein-coding	25.027	24.9869	25.0672	+0.5σ	24.9261	24.6846	25.1314	25.0534	25.1391	25.1297	25.1042	25.0603	24.8521	25.1899
539	1004	O09061	Psmb1	5	5	21.4291	21.3677	0.456188	1.04345	1.04345	KO_1Way up vs WT_12mo	-1.08624	1.18268	0.0613565	Psmb1	Psmb1	proteasome (prosome, macropain) subunit, beta type 1	Psmb1	19170	19170	17 A2|17 8.95 cM	protein-coding	21.3984	21.3677	21.4291	+0.5σ	21.3288	21.4405	21.4553	21.2227	21.3914	21.2496	21.6541	21.3736	21.4536	21.4146
621	1005	Q9QYA2	Tomm40	5	5	25.347	25.2598	0.457509	1.0623	1.0623	KO_1Way up vs WT_12mo	-1.12535	1.26994	0.0871897	Tomm40	Tomm40	translocase of outer mitochondrial membrane 40	Tomm40	53333	53333	7|7 A3	protein-coding	25.3034	25.2598	25.347	+0.5σ	24.9842	25.1608	25.5128	25.1913	25.4499	25.1376	25.352	25.4377	25.4174	25.3903
1636	1006	Q8VDM6	Hnrnpul1	5	5	21.2751	21.1732	0.459458	1.07319	1.07319	KO_1Way up vs WT_12mo	-1.14909	1.32344	0.101903	Hnrnpul1	Hnrnpul1	heterogeneous nuclear ribonucleoprotein U-like 1	Hnrnpul1	232989	232989	7|7 A3	protein-coding	21.2242	21.1732	21.2751	+0.5σ	21.027	21.0308	21.2158	21.1192	21.4731	21.4308	21.2242	21.4425	21.3796	20.8985
1604	1007	Q8CBB7	Ap1g1	5	5	17.9045	17.7871	0.459624	1.08476	1.08476	KO_1Way up vs WT_12mo	-1.17371	1.38111	0.117379	Ap1g1	Ap1g1	adaptor protein complex AP-1, gamma 1 subunit	Ap1g1	11765	11765	8 D3|8 57.26 cM	protein-coding	17.8458	17.7871	17.9045	+0.5σ	17.8748	17.8435	17.7038	17.8893	17.6242	18.0924	18.3577	17.6504	17.8151	17.6068
1088	1008	B2RUS7	Abcc8	5	5	16.6571	16.5109	0.461039	1.10664	1.10664	KO_1Way up vs WT_12mo	-1.22195	1.49645	0.14618	Abcc8	Abcc8	ATP-binding cassette, sub-family C (CFTR/MRP), member 8	Abcc8	20927	20927	7 B3|7 29.66 cM	protein-coding	16.584	16.5109	16.6571	+0.5σ	15.9543	16.7377	16.6002	16.454	16.8082	16.2575	16.7835	16.5728	16.888	16.7835
122	1009	Q9Z2I9	Sucla2	5	5	26.3321	26.3659	0.463786	0.97683	-1.02372	KO_1Way down vs WT_12mo	-1.09824	1.04794	-0.0338213	Sucla2	Sucla2	succinate-Coenzyme A ligase, ADP-forming, beta subunit	Sucla2	20916	20916	14|14 D3	protein-coding	26.349	26.3321	26.3659	-0.5σ	26.3439	26.4545	26.3685	26.3827	26.2801	26.3559	26.3815	26.4166	26.2603	26.2462
1339	1010	Q8VBW6	Nae1	5	5	19.2671	19.1698	0.463909	1.06978	1.06978	KO_1Way up vs WT_12mo	-1.14429	1.30956	0.0973144	Nae1	Nae1	NEDD8 activating enzyme E1 subunit 1	Nae1	234664	234664	8|8 D3	protein-coding	19.2185	19.1698	19.2671	+0.5σ	19.0468	19.5852	19.2142	18.9921	19.0107	19.1579	19.1579	19.254	19.2763	19.4895
1453	1011	A0A0R4J0L6	Mrps35	5	5	18.9281	18.6175	0.463911	1.24018	1.24018	KO_1Way up vs WT_12mo	-1.53743	2.36462	0.310546	Mrps35	Mrps35	mitochondrial ribosomal protein S35	Mrps35	232536	232536	6|6 G3	protein-coding	18.7728	18.6175	18.9281	+1σ	18.5943	18.4634	19.0216	18.6829	18.3255	18.5531	18.1132	20.3598	19.0302	18.5841
534	1012	A0A140LHQ8	Picalm	5	5	19.0488	19.1721	0.463914	0.918088	-1.08922	KO_1Way down vs WT_12mo	-1.40733	1.18622	-0.123296	Picalm	Picalm	phosphatidylinositol binding clathrin assembly protein	Picalm	233489	233489	7 D3|7 50.47 cM	protein-coding	19.1105	19.0488	19.1721	-0.5σ	19.12	19.2109	18.9857	19.593	18.9507	18.9935	18.7455	19.0752	18.9935	19.4361
1682	1013	Q91XU3	Pip4k2c	5	5	17.8959	18.0583	0.465257	0.893554	-1.11913	KO_1Way down vs WT_12mo	-1.56995	1.25351	-0.162373	Pip4k2c	Pip4k2c	phosphatidylinositol-5-phosphate 4-kinase, type II, gamma	Pip4k2c	117150	117150	10|10 D3	protein-coding	17.9771	17.8959	18.0583	-0.5σ	18.4426	18.2425	17.9966	17.3499	18.2597	17.8402	18.2322	17.7339	17.7374	17.9356
1597	1014	O08583	Alyref	5	5	18.8245	18.9115	0.46546	0.94149	-1.06215	KO_1Way down vs WT_12mo	-1.27342	1.12876	-0.086983	Alyref	Alyref	Aly/REF export factor	Alyref	21681	21681	11|11 E2	protein-coding	18.868	18.8245	18.9115	-0.5σ	19.1564	18.9507	18.9636	18.5806	18.9063	18.7983	18.8218	18.7231	19.0692	18.7103
1512	1015	Q8CHK3	Mboat7	5	5	16.3776	16.6026	0.465876	0.855624	-1.16874	KO_1Way down vs WT_12mo	-1.86927	1.36848	-0.224951	Mboat7	Mboat7	membrane bound O-acyltransferase domain containing 7	Mboat7	77582	77582	7|7 A1	protein-coding	16.4901	16.3776	16.6026	-1σ	16.0024	16.6576	16.6576	17.1717	16.5236	16.4349	15.9705	16.7664	16.9536	15.7627
1599	1016	P47791	Gsr	5	5	18.6509	18.3678	0.467	1.21684	1.21684	KO_1Way up vs WT_12mo	-1.48645	2.20098	0.28314	Gsr	Gsr	glutathione reductase	Gsr	14782	14782	8 A4|8 20.69 cM	protein-coding	18.5094	18.3678	18.6509	+1σ	18.8456	18.6829	18.3012	17.3551	18.654	18.9214	18.1978	17.9257	18.8887	19.3209
673	1017	Q9CWJ9	Atic	5	5	21.7725	21.7386	0.467155	1.02375	1.02375	KO_1Way up vs WT_12mo	-1.04857	1.09897	0.0338607	Atic	Atic	5-aminoimidazole-4-carboxamide ribonucleotide formyltransferase/IMP cyclohydrolase	Atic	108147	108147	1|1 C3	protein-coding	21.7555	21.7386	21.7725	+0.5σ	21.8152	21.6337	21.8071	21.7061	21.7313	21.7045	21.6993	21.8224	21.8224	21.8139
308	1018	P62897	Cycs	5	5	26.9421	26.9754	0.467749	0.977145	-1.02339	KO_1Way down vs WT_12mo	-1.09753	1.04793	-0.0333552	Cycs	Cycs	cytochrome c, somatic	Cycs	13063	13063	6 B2.3|6 24.32 cM	protein-coding	26.9587	26.9421	26.9754	-0.5σ	27.0403	27.0084	26.9398	27.0084	26.8804	27.0397	26.9773	26.9121	26.8424	26.939
455	1019	Q91VR5	Ddx1	5	5	21.1993	21.2426	0.470423	0.970411	-1.03049	KO_1Way down vs WT_12mo	-1.12915	1.06331	-0.0433329	Ddx1	Ddx1	DEAD box helicase 1	Ddx1	104721	104721	12|12 A1.1	protein-coding	21.2209	21.1993	21.2426	-0.5σ	21.3328	21.2359	21.2056	21.2621	21.1765	21.1476	21.2921	21.0711	21.1436	21.3418
1389	1020	Q9WV02	Rbmx	5	5	18.3439	18.1366	0.470584	1.15455	1.15455	KO_1Way up vs WT_12mo	-1.34164	1.78839	0.20733	Rbmx	Rbmx	RNA binding motif protein, X chromosome	Rbmx	19655	19655	X|X A6	protein-coding	18.2402	18.1366	18.3439	+1σ	18.5399	17.5997	17.9189	18.2543	18.37	18.8644	18.5841	18.2322	17.5831	18.4557
1538	1021	A0A0R4J050	Acy1	5	5	14.5492	14.649	0.470652	0.933156	-1.07163	KO_1Way down vs WT_12mo	-1.32297	1.15202	-0.0998095	Acy1	Acy1	aminoacylase 1	Acy1	109652	109652	9 F1|9 57.49 cM	protein-coding	14.5991	14.5492	14.649	-0.5σ	14.3757	14.6509	14.9599	14.6886	14.5698	14.6889	14.2945	14.6145	14.376	14.772
665	1022	P62242	Rps8	5	5	23.2152	23.1757	0.471282	1.02777	1.02777	KO_1Way up vs WT_12mo	-1.05775	1.11731	0.0395125	Rps8	Rps8	ribosomal protein S8	Rps8	20116	20116	4|4 D1	protein-coding	23.1955	23.1757	23.2152	+0.5σ	23.1933	23.3106	23.1146	23.1299	23.1299	23.3089	23.094	23.1704	23.258	23.2446
1306	1023	Q9CRB6	Tppp3	5	5	21.3579	21.2865	0.471761	1.05075	1.05075	KO_1Way up vs WT_12mo	-1.107	1.2222	0.0714178	Tppp3	Tppp3	tubulin polymerization-promoting protein family member 3	Tppp3	67971	67971	8|8 D3	protein-coding	21.3222	21.2865	21.3579	+0.5σ	21.3914	21.1705	21.3361	21.0868	21.4477	21.4813	21.2029	21.5117	21.3854	21.2082
1328	1024	Q60749	Khdrbs1	5	5	18.9314	19.2098	0.471831	0.824501	-1.21285	KO_1Way down vs WT_12mo	-2.18651	1.4864	-0.278406	Khdrbs1	Khdrbs1	KH domain containing, RNA binding, signal transduction associated 1	Khdrbs1	20218	20218	4|4 D2.2	protein-coding	19.0706	18.9314	19.2098	-1σ	19.3131	19.4521	18.8078	19.1408	19.335	19.1712	19.085	19.2952	17.5609	19.5444
986	1025	P56375	Acyp2	5	5	22.9824	23.0346	0.471923	0.964452	-1.03686	KO_1Way down vs WT_12mo	-1.15807	1.0772	-0.0522185	Acyp2	Acyp2	acylphosphatase 2, muscle type	Acyp2	75572	75572	11|11 A4	protein-coding	23.0085	22.9824	23.0346	-0.5σ	22.9919	22.9125	22.9919	23.054	23.2227	23.0871	22.8823	23.094	22.9486	22.9
1534	1026	P35279	Rab6a	5	5	19.0463	18.952	0.4723	1.0675	1.0675	KO_1Way up vs WT_12mo	-1.14383	1.30346	0.0942391	Rab6a	Rab6a	RAB6A, member RAS oncogene family	Rab6a	19346	19346	7|7 E2	protein-coding	18.9992	18.952	19.0463	+0.5σ	19.0393	19.18	19.0183	18.6729	18.8498	18.9606	18.8983	19.371	19.1032	18.8983
623	1027	Q8CC88	Vwa8	5	5	21.6214	21.7001	0.473871	0.946873	-1.05611	KO_1Way down vs WT_12mo	-1.24869	1.11954	-0.0787566	Vwa8	Vwa8	von Willebrand factor A domain containing 8	Vwa8	219189	219189	14|14 D3	protein-coding	21.6608	21.6214	21.7001	-0.5σ	21.98	21.5282	21.6503	21.8588	21.4834	21.7429	21.6177	21.5374	21.5187	21.6902
1414	1028	Q9QZE7	Tsnax	5	5	13.8366	13.6163	0.473937	1.16495	1.16495	KO_1Way up vs WT_12mo	-1.37148	1.86125	0.22027	Tsnax	Tsnax	translin-associated factor X	Tsnax	53424	53424	8 E2|8 73.1 cM	protein-coding	13.7264	13.6163	13.8366	+1σ	13.3639	13.3639	14.2131	12.9277	14.2131	13.3641	14.0193	13.6565	14.0193	14.1237
1596	1029	P99028	Uqcrh	5	5	20.5163	20.7074	0.474198	0.875956	-1.14161	KO_1Way down vs WT_12mo	-1.71453	1.31556	-0.191069	Uqcrh	Uqcrh	ubiquinol-cytochrome c reductase hinge protein	Uqcrh	66576	66576	4|4 D1	protein-coding	20.6119	20.5163	20.7074	-1σ	20.1305	20.5231	20.9678	21.2582	20.6572	20.4646	20.6662	20.7932	20.7659	19.8916
553	1030	P60335	Pcbp1	5	5	23.1692	23.1171	0.47499	1.03678	1.03678	KO_1Way up vs WT_12mo	-1.07789	1.15863	0.0521095	Pcbp1	Pcbp1	poly(rC) binding protein 1	Pcbp1	23983	23983	6|6 D1	protein-coding	23.1431	23.1171	23.1692	+0.5σ	23.2311	23.1663	22.9125	23.1663	23.1094	22.998	23.1997	23.2138	23.2138	23.2208
361	1031	Q3UGX2	Sptb	5	5	21.407	21.4707	0.475184	0.956798	-1.04515	KO_1Way down vs WT_12mo	-1.19733	1.09611	-0.0637141	Sptb	Sptb	spectrin beta, erythrocytic	Sptb	20741	20741	12 C3|12 33.73 cM	protein-coding	21.4388	21.407	21.4707	-0.5σ	21.3703	21.4066	21.352	21.4877	21.7368	21.5218	21.2601	21.4758	21.4391	21.3379
376	1032	P61205	Arf3	5	5	24.4189	24.45	0.4758	0.978717	-1.02175	KO_1Way down vs WT_12mo	-1.09179	1.04582	-0.031036	Arf3	Arf3	ADP-ribosylation factor 3	Arf3	11842	11842	15|15 F1	protein-coding	24.4344	24.4189	24.45	-0.5σ	24.4061	24.4604	24.4729	24.3373	24.5731	24.4322	24.4495	24.3669	24.4322	24.4138
965	1033	A6X935	Itih4	5	5	20.3587	20.2522	0.477854	1.07664	1.07664	KO_1Way up vs WT_12mo	-1.16751	1.35331	0.106534	Itih4	Itih4	inter alpha-trypsin inhibitor, heavy chain 4	Itih4	16427	16427	14 B|14 19.09 cM	protein-coding	20.3055	20.2522	20.3587	+0.5σ	20.1485	20.0784	20.1414	20.6434	20.249	20.3665	20.0069	20.6039	20.493	20.3231
29	1034	Q60675	Lama2	5	5	26.0868	26.126	0.478945	0.973205	-1.02753	KO_1Way down vs WT_12mo	-1.11795	1.05884	-0.0391842	Lama2	Lama2	laminin, alpha 2	Lama2	16773	16773	10 A4|10 14.23 cM	protein-coding	26.1064	26.0868	26.126	-0.5σ	26.0867	26.1562	26.0552	26.0376	26.2941	26.0267	26.1177	26.0267	26.1314	26.1314
2041	1035	Q6NY15	Tsga10	5	5	18.0344	18.3586	0.482389	0.798769	-1.25193	KO_1Way down vs WT_12mo	-2.52958	1.61395	-0.32415	Tsga10	Tsga10	testis specific 10	Tsga10	211484	211484	1|1 B	protein-coding	18.1965	18.0344	18.3586	-1σ	18.863	17.4813	17.9405	18.4149	19.0933	18.4692	17.4196	19.0227	17.2693	17.9914
1937	1036	E9Q7G0	Numa1	5	5	16.1342	16.0457	0.482455	1.06324	1.06324	KO_1Way up vs WT_12mo	-1.1396	1.28831	0.0884718	Numa1	Numa1	nuclear mitotic apparatus protein 1	Numa1	101706	101706	7|7 E2	protein-coding	16.09	16.0457	16.1342	+0.5σ	16.1302	16.1147	16.0803	15.6302	16.273	16.2233	16.1153	16.2737	16.0031	16.0554
1308	1037	O54950	Prkag1	5	5	15.5449	15.6737	0.482933	0.914614	-1.09336	KO_1Way down vs WT_12mo	-1.44631	1.20987	-0.128765	Prkag1	Prkag1	protein kinase, AMP-activated, gamma 1 non-catalytic subunit	Prkag1	19082	19082	15 F1|15 54.73 cM	protein-coding	15.6093	15.5449	15.6737	-0.5σ	15.6302	16.143	15.8488	15.2761	15.4702	15.4707	15.71	15.3343	15.7998	15.4096
1344	1038	P14115	Rpl27a	5	5	20.4185	20.3167	0.484074	1.07312	1.07312	KO_1Way up vs WT_12mo	-1.16326	1.33958	0.101807	Rpl27a	Rpl27a	ribosomal protein L27A	Rpl27a	26451	26451	7 E3|7 57.26 cM	protein-coding	20.3676	20.3167	20.4185	+0.5σ	20.5634	20.5764	20.016	20.4069	20.0206	20.4366	20.3598	20.5371	20.2218	20.5371
395	1039	E9PWE8	Dpysl3	5	5	22.2942	22.2305	0.484121	1.04515	1.04515	KO_1Way up vs WT_12mo	-1.09928	1.20079	0.063712	Dpysl3	Dpysl3	dihydropyrimidinase-like 3	Dpysl3	22240	22240	18|18 B3	protein-coding	22.2624	22.2305	22.2942	+0.5σ	22.1638	22.1682	22.344	22.0587	22.4178	22.0862	22.3035	22.3126	22.4348	22.3339
113	1040	P70404	Idh3g	5	5	26.4381	26.3678	0.484593	1.04993	1.04993	KO_1Way up vs WT_12mo	-1.11028	1.22392	0.070298	Idh3g	Idh3g	isocitrate dehydrogenase 3 (NAD+), gamma	Idh3g	15929	15929	X A7.3|X 37.41 cM	protein-coding	26.403	26.3678	26.4381	+0.5σ	26.0727	26.4395	26.4855	26.3046	26.5366	26.4834	26.2787	26.3815	26.5117	26.5351
494	1041	Q8CGC7	Eprs	5	5	21.498	21.5622	0.487101	0.956462	-1.04552	KO_1Way down vs WT_12mo	-1.20373	1.1012	-0.0642203	Eprs	Eprs	glutamyl-prolyl-tRNA synthetase	Eprs	107508	107508	1|1 H5	protein-coding	21.5301	21.498	21.5622	-0.5σ	21.7919	21.492	21.4112	21.5341	21.5818	21.7127	21.5464	21.4052	21.4462	21.3796
1750	1042	Q8VDP6	Cdipt	5	5	17.3679	17.2861	0.489463	1.05834	1.05834	KO_1Way up vs WT_12mo	-1.13178	1.26769	0.0818	Cdipt	Cdipt	CDP-diacylglycerol--inositol 3-phosphatidyltransferase (phosphatidylinositol synthase)	Cdipt	52858	52858	7 F3|7 69.26 cM	protein-coding	17.327	17.2861	17.3679	+0.5σ	17.3276	17.1548	17.342	17.5941	17.0123	17.4457	17.496	17.4322	17.2385	17.2274
680	1043	A0A0R4J094	Fahd2a	5	5	21.9395	21.8284	0.490123	1.07999	1.07999	KO_1Way up vs WT_12mo	-1.1834	1.38029	0.111015	Fahd2a	Fahd2a	fumarylacetoacetate hydrolase domain containing 2A	Fahd2a	68126	68126	2|2 F1	protein-coding	21.8839	21.8284	21.9395	+0.5σ	21.4323	21.656	21.8787	22.0876	22.0876	22.0026	21.9641	22.1344	21.9785	21.6177
994	1044	P35282	Rab21	5	5	20.8503	20.9197	0.490253	0.953001	-1.04932	KO_1Way down vs WT_12mo	-1.22344	1.11115	-0.0694501	Rab21	Rab21	RAB21, member RAS oncogene family	Rab21	216344	216344	10|10 D2	protein-coding	20.885	20.8503	20.9197	-0.5σ	20.9254	21.1329	20.8403	20.6878	21.0122	20.8011	21.044	20.7838	20.7039	20.9185
1537	1045	F7C846	Mtx1	5	5	19.4317	19.3204	0.490402	1.08021	1.08021	KO_1Way up vs WT_12mo	-1.18413	1.38172	0.111315	Mtx1	Mtx1	metaxin 1	Mtx1	17827	17827	3 F1|3 39.01 cM	protein-coding	19.376	19.3204	19.4317	+0.5σ	19.3882	19.6785	19.4935	19.2275	18.8144	19.3457	19.5036	19.2864	19.4961	19.5268
1638	1046	Q8BMD8	Slc25a24	5	5	15.383	15.3165	0.49061	1.04719	1.04719	KO_1Way up vs WT_12mo	-1.10635	1.21323	0.0665199	Slc25a24	Slc25a24	solute carrier family 25 (mitochondrial carrier, phosphate carrier), member 24	Slc25a24	229731	229731	3|3 F3	protein-coding	15.3498	15.3165	15.383	+0.5σ	15.3337	15.4702	15.3767	15.1257	15.2761	15.3343	15.6576	15.3038	15.3775	15.2418
382	1047	P54775	Psmc4	5	5	20.3895	20.4957	0.490672	0.929054	-1.07636	KO_1Way down vs WT_12mo	-1.36141	1.17509	-0.106166	Psmc4	Psmc4	proteasome (prosome, macropain) 26S subunit, ATPase, 4	Psmc4	23996	23996	7 A3|7 16.11 cM	protein-coding	20.4426	20.3895	20.4957	-0.5σ	20.3404	20.5981	20.6027	20.6643	20.273	20.1894	20.6136	20.0022	20.5417	20.6006
846	1048	O35344	Kpna3	5	5	17.8041	17.9376	0.490945	0.911616	-1.09695	KO_1Way down vs WT_12mo	-1.47425	1.22517	-0.133501	Kpna3	Kpna3	karyopherin (importin) alpha 3	Kpna3	16648	16648	14|14 D1	protein-coding	17.8709	17.8041	17.9376	-0.5σ	17.9966	18.4426	17.4953	17.9658	17.7876	17.4604	18.0113	18.0113	17.7784	17.7591
1207	1049	Q91WU5	As3mt	5	5	18.2649	18.3432	0.49228	0.947195	-1.05575	KO_1Way down vs WT_12mo	-1.25622	1.12706	-0.0782671	As3mt	As3mt	arsenite methyltransferase	As3mt	57344	57344	19|19 C3	protein-coding	18.3041	18.2649	18.3432	-0.5σ	18.3954	18.1874	18.2313	18.6104	18.2914	18.0282	18.1341	18.3801	18.4398	18.3424
1960	1050	Q8CI03	Flywch1	5	5	23.223	23.3418	0.492575	0.920991	-1.08579	KO_1Way down vs WT_12mo	-1.41377	1.19919	-0.118741	Flywch1	Flywch1	FLYWCH-type zinc finger 1	Flywch1	224613	224613	17|17 A3.3	protein-coding	23.2824	23.223	23.3418	-0.5σ	23.0701	23.2372	23.3312	23.5513	23.519	22.719	23.3673	23.3723	23.5098	23.1468
255	1051	Q9DCN2	Cyb5r3	5	5	24.3269	24.2821	0.494991	1.03151	1.03151	KO_1Way up vs WT_12mo	-1.07148	1.14006	0.0447548	Cyb5r3	Cyb5r3	cytochrome b5 reductase 3	Cyb5r3	109754	109754	15 E1|15 39.4 cM	protein-coding	24.3045	24.2821	24.3269	+0.5σ	24.2491	24.2182	24.2937	24.3683	24.2814	24.1122	24.3465	24.4495	24.3906	24.3356
463	1052	P19324	Serpinh1	5	5	23.5231	23.4736	0.495855	1.03495	1.03495	KO_1Way up vs WT_12mo	-1.0797	1.15648	0.0495586	Serpinh1	Serpinh1	serine (or cysteine) peptidase inhibitor, clade H, member 1	Serpinh1	12406	12406	7|7 E1	protein-coding	23.4983	23.4736	23.5231	+0.5σ	23.6929	23.4606	23.4338	23.4228	23.3578	23.6646	23.4325	23.4742	23.5171	23.5272
393	1053	O08529	Capn2	5	5	22.333	22.2704	0.496818	1.04436	1.04436	KO_1Way up vs WT_12mo	-1.10209	1.20204	0.0626198	Capn2	Capn2	calpain 2	Capn2	12334	12334	1|1 H5	protein-coding	22.3017	22.2704	22.333	+0.5σ	22.3862	22.2817	22.2254	22.2696	22.1888	22.244	22.1715	22.2493	22.6337	22.3664
1262	1054	Q61735	Cd47	5	5	19.9415	19.8939	0.49727	1.03352	1.03352	KO_1Way up vs WT_12mo	-1.07677	1.15017	0.0475689	Cd47	Cd47	CD47 antigen (Rh-related antigen, integrin-associated signal transducer)	Cd47	16423	16423	16|16 B5	protein-coding	19.9177	19.8939	19.9415	+0.5σ	19.8678	19.8678	19.751	19.9539	20.029	20.0307	19.9693	19.8546	19.8057	20.0471
218	1055	D3Z7H8	Cilp2	5	5	24.5922	24.5291	0.499893	1.04468	1.04468	KO_1Way up vs WT_12mo	-1.104	1.20484	0.0630544	Cilp2	Cilp2	cartilage intermediate layer protein 2	Cilp2	68709	68709	8|8 B3.3	protein-coding	24.5606	24.5291	24.5922	+0.5σ	24.5977	24.5863	24.5594	24.3159	24.5863	24.4709	24.7339	24.3752	24.7064	24.6744
1456	1056	Q9Z2T6	Krt85	5	5	13.8587	14.6268	0.50017	0.587198	-1.703	KO_1Way down vs WT_12mo	-9.69015	3.34117	-0.768082	Krt85	Krt85	keratin 85	Krt85	53622	53622	15 F2|15	protein-coding	14.2427	13.8587	14.6268	-3σ	18.8872	13.8625	13.3639	13.6563	13.3639	13.6565	14.4925	14.1237	13.3641	13.6565
1249	1057	Q9CQ92	Fis1	5	5	20.8305	20.9157	0.500657	0.942661	-1.06083	KO_1Way down vs WT_12mo	-1.28675	1.14342	-0.0851887	Fis1	Fis1	fission, mitochondrial 1	Fis1	66437	66437	5|5 G2	protein-coding	20.8731	20.8305	20.9157	-0.5σ	20.758	21.0868	20.7688	21.1534	20.8116	20.7556	20.6743	21.0058	20.6506	21.0664
431	1058	A2AEX6	Fhl1	5	5	22.6927	22.6333	0.500945	1.04208	1.04208	KO_1Way up vs WT_12mo	-1.09816	1.19252	0.0594608	Fhl1	Fhl1	four and a half LIM domains 1	Fhl1	14199	14199	X|X A6	protein-coding	22.663	22.6333	22.6927	+0.5σ	22.645	22.5151	22.5053	22.7504	22.7504	22.6662	22.6487	22.9179	22.7131	22.5177
224	1059	Q9ERD7	Tubb3	5	5	17.5144	17.4374	0.501918	1.05481	1.05481	KO_1Way up vs WT_12mo	-1.12934	1.25652	0.0769783	Tubb3	Tubb3	tubulin, beta 3 class III	Tubb3	22152	22152	8|8 E1	protein-coding	17.4759	17.4374	17.5144	+0.5σ	17.2103	17.4887	17.6443	17.4887	17.3551	17.3504	17.3988	17.4105	17.64	17.7722
1093	1060	A0A0B4J1J7	Ighv1-82	5	5	21.1295	20.789	0.502021	1.26619	1.26619	KO_1Way up vs WT_12mo	-1.71294	2.74625	0.340495	Ighv1-82	Ighv1-82	immunoglobulin heavy variable 1-82	Ighv1-82	100775175	100775175	12 F2|12 62.59 cM	other	20.9593	20.789	21.1295	+1σ	20.6076	19.8868	21.5236	21.3635	20.5634	22.3775	20.699	21.5464	20.1613	20.8633
179	1061	Q8CGK3	Lonp1	5	5	23.3507	23.388	0.502651	0.974466	-1.0262	KO_1Way down vs WT_12mo	-1.11722	1.0609	-0.0373164	Lonp1	Lonp1	lon peptidase 1, mitochondrial	Lonp1	74142	74142	17|17 D	protein-coding	23.3694	23.3507	23.388	-0.5σ	23.3038	23.3804	23.3938	23.4013	23.4606	23.4214	23.3566	23.258	23.4814	23.2358
732	1062	Q9CQC9	Sar1b	5	5	22.6387	22.5841	0.503382	1.03861	1.03861	KO_1Way up vs WT_12mo	-1.09066	1.1765	0.0546471	Sar1b	Sar1b	secretion associated Ras related GTPase 1B	Sar1b	66397	66397	11|11 B1.3	protein-coding	22.6114	22.5841	22.6387	+0.5σ	22.5188	22.5792	22.5792	22.6076	22.6354	22.6802	22.5403	22.5218	22.9179	22.5333
1719	1063	Q9CQX2	Cyb5b	5	5	17.6401	17.4373	0.503393	1.15099	1.15099	KO_1Way up vs WT_12mo	-1.38018	1.82844	0.202879	Cyb5b	Cyb5b	cytochrome b5 type B	Cyb5b	66427	66427	8|8 D3	protein-coding	17.5387	17.4373	17.6401	+1σ	16.7554	17.8074	17.9098	16.8488	17.865	18.0046	17.3893	17.5036	17.8836	17.4196
690	1064	P63030	Mpc1	5	5	20.0516	19.9333	0.503596	1.08542	1.08542	KO_1Way up vs WT_12mo	-1.20676	1.42173	0.118252	Mpc1	Mpc1	mitochondrial pyruvate carrier 1	Mpc1	55951	55951	17 A1|17 4.92 cM	protein-coding	19.9925	19.9333	20.0516	+0.5σ	19.6098	20.2668	20.2275	19.9772	19.5852	20.2017	20.0183	19.8654	20.2912	19.8812
1518	1065	Q8BFZ1	Tecrl	5	5	17.1676	17.3176	0.503794	0.901274	-1.10954	KO_1Way down vs WT_12mo	-1.56266	1.26934	-0.149962	Tecrl	Tecrl	trans-2,3-enoyl-CoA reductase-like	Tecrl	243078	243078	5|5 E1	protein-coding	17.2426	17.1676	17.3176	-0.5σ	17.4813	17.5941	17.2983	16.783	17.4313	17.2473	17.181	17.0562	17.6751	16.6786
510	1066	P50247	Ahcy	5	5	22.066	22.1308	0.505133	0.956135	-1.04588	KO_1Way down vs WT_12mo	-1.21302	1.10893	-0.0647131	Ahcy	Ahcy	S-adenosylhomocysteine hydrolase	Ahcy	269378	269378	2 H1|2 76.94 cM	protein-coding	22.0984	22.066	22.1308	-0.5σ	22.2305	22.2555	21.98	22.0707	22.117	21.8766	22.2072	22.1827	22.1872	21.8766
823	1067	Q06185	Atp5k	5	5	25.5473	25.5869	0.505458	0.972864	-1.02789	KO_1Way down vs WT_12mo	-1.12582	1.06555	-0.0396901	Atp5k	Atp5k	ATP synthase, H+ transporting, mitochondrial F1F0 complex, subunit E	Atp5k	11958	11958	5 F|5 53.11 cM	protein-coding	25.5671	25.5473	25.5869	-0.5σ	25.5	25.5847	25.6671	25.744	25.4389	25.5692	25.4987	25.5361	25.5489	25.5832
640	1068	Q5M8N4	Sdr39u1	5	5	21.5867	21.6471	0.505957	0.958964	-1.04279	KO_1Way down vs WT_12mo	-1.19802	1.10171	-0.0604519	Sdr39u1	Sdr39u1	short chain dehydrogenase/reductase family 39U, member 1	Sdr39u1	654795	654795	14|14 C3	protein-coding	21.6169	21.5867	21.6471	-0.5σ	21.7148	21.7258	21.5818	21.7455	21.4677	21.3604	21.68	21.6942	21.4944	21.7045
991	1069	P06684	Hc	5	5	19.1563	19.073	0.506147	1.05945	1.05945	KO_1Way up vs WT_12mo	-1.14292	1.28285	0.0833127	Hc	Hc	hemolytic complement	Hc	15139	15139	2 B|2 23.22 cM	protein-coding	19.1147	19.073	19.1563	+0.5σ	18.8078	19.0183	19.3295	19.1701	19.0393	19.0903	19.281	18.8644	19.3209	19.2249
1582	1070	O35350	Capn1	5	5	18.8625	18.6975	0.508331	1.1212	1.1212	KO_1Way up vs WT_12mo	-1.30559	1.64124	0.165046	Capn1	Capn1	calpain 1	Capn1	12333	12333	19 A|19 4.34 cM	protein-coding	18.78	18.6975	18.8625	+0.5σ	18.0964	18.4389	19.089	18.8582	19.0048	19.187	18.816	19.2154	18.5906	18.5034
1200	1071	P70398	Usp9x	5	5	17.4041	17.5017	0.508956	0.934563	-1.07002	KO_1Way down vs WT_12mo	-1.34103	1.17127	-0.0976363	Usp9x	Usp9x	ubiquitin specific peptidase 9, X chromosome	Usp9x	22284	22284	X A1.1|X 7.95 cM	protein-coding	17.4529	17.4041	17.5017	-0.5σ	17.7038	17.5127	17.3276	17.4452	17.5192	17.8151	17.4893	17.2112	17.4322	17.0724
1882	1072	Q9CXV1	Sdhd	5	5	21.8506	21.9539	0.509019	0.930884	-1.07425	KO_1Way down vs WT_12mo	-1.36421	1.18215	-0.103327	Sdhd	Sdhd	succinate dehydrogenase complex, subunit D, integral membrane protein	Sdhd	66925	66925	9|9 A5.3	protein-coding	21.9022	21.8506	21.9539	-0.5σ	22.3202	21.7347	21.7792	22.1525	21.7831	22.0484	21.9427	21.7902	21.5261	21.9457
659	1073	P43274	H1f4	5	5	26.5399	26.5798	0.511952	0.972735	-1.02803	KO_1Way down vs WT_12mo	-1.1281	1.06742	-0.0398813	H1f4	H1f4	H1.4 linker histone, cluster member	H1f4	50709	50709	13|13 A3.1	protein-coding	26.5599	26.5399	26.5798	-0.5σ	26.6201	26.4855	26.572	26.708	26.5134	26.5548	26.5548	26.5701	26.3815	26.6383
288	1074	O88492	Plin4	5	5	24.263	24.3255	0.513993	0.957653	-1.04422	KO_1Way down vs WT_12mo	-1.20852	1.10833	-0.0624245	Plin4	Plin4	perilipin 4	Plin4	57435	57435	17|17 D	protein-coding	24.2943	24.263	24.3255	-0.5σ	24.4996	24.1922	24.1861	24.3066	24.4428	24.3906	24.1852	24.4043	24.0557	24.2793
340	1075	Q9DCJ5	Ndufa8	5	5	25.2285	25.2638	0.514862	0.975804	-1.0248	KO_1Way down vs WT_12mo	-1.11336	1.06014	-0.0353364	Ndufa8	Ndufa8	NADH:ubiquinone oxidoreductase subunit A8	Ndufa8	68375	68375	2|2 B	protein-coding	25.2462	25.2285	25.2638	-0.5σ	25.3316	25.3799	25.2257	25.2634	25.1185	25.1899	25.3096	25.2367	25.2464	25.1599
195	1076	Q8VEM8	Slc25a3	5	5	18.4512	19.2708	0.515062	0.56661	-1.76488	KO_1Way down vs WT_12mo	-12.0803	3.87833	-0.819572	Slc25a3	Slc25a3	solute carrier family 25 (mitochondrial carrier, phosphate carrier), member 3	Slc25a3	18674	18674	10|10 C2	protein-coding	18.861	18.4512	19.2708	-3σ	17.9349	18.4679	21.7722	20.1821	17.9966	18.2727	17.3649	16.7239	22.0862	17.8082
184	1077	P61979	Hnrnpk	5	5	24.0565	24.029	0.515524	1.0192	1.0192	KO_1Way up vs WT_12mo	-1.0465	1.08708	0.027441	Hnrnpk	Hnrnpk	heterogeneous nuclear ribonucleoprotein K	Hnrnpk	15387	15387	13|13 B1	protein-coding	24.0428	24.029	24.0565	+0.5σ	24.0217	24.006	23.9459	24.1144	24.0571	23.9596	24.0557	24.1398	24.0804	24.0468
966	1078	Q8QZY1	Eif3l	5	5	19.742	19.6672	0.515892	1.05316	1.05316	KO_1Way up vs WT_12mo	-1.13193	1.25547	0.074718	Eif3l	Eif3l	eukaryotic translation initiation factor 3, subunit L	Eif3l	223691	223691	15 E1|15 37.7 cM	protein-coding	19.7046	19.6672	19.742	+0.5σ	19.5308	19.7988	19.4521	19.7382	19.8163	19.8546	19.831	19.8846	19.4433	19.6964
509	1079	Q9D1G1	Rab1b	5	5	22.5641	22.5028	0.516026	1.04341	1.04341	KO_1Way up vs WT_12mo	-1.10709	1.2053	0.0613109	Rab1b	Rab1b	RAB1B, member RAS oncogene family	Rab1b	76308	76308	19|19 A	protein-coding	22.5334	22.5028	22.5641	+0.5σ	22.7059	22.4234	22.3618	22.6408	22.3818	22.7306	22.5218	22.6394	22.5218	22.4067
1415	1080	P13634	Car1	5	5	18.1019	17.8762	0.516043	1.16932	1.16932	KO_1Way up vs WT_12mo	-1.45424	1.98839	0.225669	Car1	Car1	carbonic anhydrase 1	Car1	12346	12346	3 A1|3 3.18 cM	protein-coding	17.989	17.8762	18.1019	+1σ	17.9189	17.7658	17.163	18.0552	18.4781	18.7368	18.5133	17.2693	17.9722	18.0178
957	1081	Q9JIF7	Copb1	5	5	18.6322	18.5612	0.517237	1.05045	1.05045	KO_1Way up vs WT_12mo	-1.1256	1.24202	0.0710012	Copb1	Copb1	coatomer protein complex, subunit beta 1	Copb1	70349	70349	7 F1|7 59.31 cM	protein-coding	18.5967	18.5612	18.6322	+0.5σ	18.7009	18.37	18.7487	18.4741	18.5123	18.3801	18.7231	18.5271	18.7561	18.7746
57	1082	P97807	Fh1	5	5	27.2379	27.213	0.517509	1.01739	1.01739	KO_1Way up vs WT_12mo	-1.04235	1.0789	0.0248659	Fh1	Fh1	fumarate hydratase 1	Fh1	14194	14194	1|1 H3	protein-coding	27.2254	27.213	27.2379	+0.5σ	27.0903	27.2008	27.2666	27.2008	27.3066	27.2379	27.2379	27.2379	27.2379	27.2379
259	1083	Q9WV35	Apobec2	5	5	22.6108	22.5413	0.52248	1.04937	1.04937	KO_1Way up vs WT_12mo	-1.12521	1.23905	0.0695193	Apobec2	Apobec2	apolipoprotein B mRNA editing enzyme, catalytic polypeptide 2	Apobec2	11811	11811	17 C|17 24.02 cM	protein-coding	22.576	22.5413	22.6108	+0.5σ	22.497	22.6871	22.7097	22.2939	22.5188	22.3807	22.7131	22.5139	22.772	22.6746
1102	1084	P30416	Fkbp4	5	5	19.3857	19.5318	0.522641	0.903734	-1.10652	KO_1Way down vs WT_12mo	-1.56892	1.28139	-0.146029	Fkbp4	Fkbp4	FK506 binding protein 4	Fkbp4	14228	14228	6|6 F3	protein-coding	19.4587	19.3857	19.5318	-0.5σ	20.2199	19.298	19.1564	19.2895	19.6949	19.3972	19.7583	19.3209	19.1712	19.281
1008	1085	G3X914	Cul5	5	5	19.1478	19.0288	0.523017	1.08598	1.08598	KO_1Way up vs WT_12mo	-1.22423	1.4438	0.118997	Cul5	Cul5	cullin 5	Cul5	75717	75717	9|9 A5.3	protein-coding	19.0883	19.0288	19.1478	+0.5σ	18.6729	19.0279	19.5376	18.9462	18.9594	18.9649	19.1172	18.9351	19.5444	19.1774
281	1086	P61982	Ywhag	5	5	23.4646	23.4938	0.524696	0.979979	-1.02043	KO_1Way down vs WT_12mo	-1.09455	1.05116	-0.0291767	Ywhag	Ywhag	tyrosine 3-monooxygenase/tryptophan 5-monooxygenase activation protein, gamma polypeptide	Ywhag	22628	22628	5|5 G2	protein-coding	23.4792	23.4646	23.4938	-0.5σ	23.6241	23.519	23.4283	23.5036	23.3938	23.5098	23.4588	23.4506	23.4077	23.4961
1126	1087	Q9D7B2	Lims1	5	5	20.9852	21.0477	0.524711	0.957563	-1.04432	KO_1Way down vs WT_12mo	-1.21376	1.11293	-0.0625609	Lims1	Lims1	LIM and senescent cell antigen-like domains 1	Lims1	110829	110829	10 B4|10 29.31 cM	protein-coding	21.0164	20.9852	21.0477	-0.5σ	21.0202	20.9779	21.0233	21.0466	21.1705	20.7039	21.0217	20.878	21.1919	21.1302
2012	1088	A0A0A6YVU8	Gm9774	5	5	17.6555	17.8787	0.525104	0.8567	-1.16727	KO_1Way down vs WT_12mo	-1.99665	1.46541	-0.223138	Gm9774	Gm9774	adhesion regulating molecule 1 pseudogene	Gm9774	100043022	100043022	3|3 F1	pseudo	17.7671	17.6555	17.8787	-1σ	19.0434	17.4392	17.1405	17.737	18.0331	17.6504	17.9414	17.64	17.526	17.5198
1926	1089	Q8BTZ7	Gmppb	5	5	14.3365	14.0048	0.525448	1.25855	1.25855	KO_1Way up vs WT_12mo	-1.76621	2.79758	0.331761	Gmppb	Gmppb	GDP-mannose pyrophosphorylase B	Gmppb	331026	331026	9|9 F1	protein-coding	14.1707	14.0048	14.3365	+1σ	14.2131	14.019	12.9277	14.5698	14.2941	14.1237	13.8628	13.8628	15.9705	13.8628
577	1090	Q9DCD0	Pgd	5	5	21.3935	21.3618	0.525649	1.02222	1.02222	KO_1Way up vs WT_12mo	-1.05591	1.10335	0.0317057	Pgd	Pgd	phosphogluconate dehydrogenase	Pgd	110208	110208	4 E2|4 78.96 cM	protein-coding	21.3776	21.3618	21.3935	+0.5σ	21.4405	21.2426	21.4641	21.3328	21.3288	21.4425	21.3854	21.3214	21.3604	21.4577
1355	1091	Q91WK5	Gcsh	5	5	18.521	18.6411	0.526222	0.920104	-1.08683	KO_1Way down vs WT_12mo	-1.45219	1.22941	-0.120131	Gcsh	Gcsh	glycine cleavage system protein H (aminomethyl carrier)	Gcsh	68133	68133	8|8 E1	protein-coding	18.5811	18.521	18.6411	-0.5σ	18.6066	18.2973	18.424	18.863	19.0148	18.1097	18.5034	18.6497	18.8594	18.4828
1692	1092	Q9D0G0	Mrps30	5	5	15.6285	15.9072	0.526991	0.824339	-1.21309	KO_1Way down vs WT_12mo	-2.37919	1.61675	-0.27869	Mrps30	Mrps30	mitochondrial ribosomal protein S30	Mrps30	59054	59054	13|13 D2.3	protein-coding	15.7678	15.6285	15.9072	-1σ	16.3033	16.5104	14.6509	16.2444	15.827	15.574	16.2233	14.7318	15.574	16.0395
583	1093	P02301	H3f3c	5	5	21.9696	22.1665	0.527383	0.872443	-1.14621	KO_1Way down vs WT_12mo	-1.84549	1.40471	-0.196867	H3f3c	H3f3c	H3 histone, family 3C	H3f3c	625328	625328	2|2 E5	protein-coding	22.068	21.9696	22.1665	-1σ	21.4238	22.344	22.847	22.2039	22.0137	21.3463	22.1275	21.7816	22.4425	22.1501
1936	1094	Q9CR64	Tmem167	5	5	18.7917	18.6762	0.527964	1.08337	1.08337	KO_1Way up vs WT_12mo	-1.22118	1.43328	0.115521	Tmem167	Tmem167	transmembrane protein 167	Tmem167	66074	66074	13|13 C3	protein-coding	18.734	18.6762	18.7917	+0.5σ	18.459	18.6453	18.5399	18.6019	19.1349	18.7018	19.1526	18.384	18.9515	18.7688
1264	1095	Q6W8Q3	Pcp4l1	5	5	20.1818	20.0235	0.52867	1.11593	1.11593	KO_1Way up vs WT_12mo	-1.31574	1.63849	0.158249	Pcp4l1	Pcp4l1	Purkinje cell protein 4-like 1	Pcp4l1	66425	66425	1|1 H3	protein-coding	20.1027	20.0235	20.1818	+0.5σ	20.3209	20.3754	19.507	19.9726	19.9418	20.6097	20.3773	20.217	19.5155	20.1894
1018	1096	P21279	Gnaq	5	5	17.5028	17.6263	0.530275	0.918006	-1.08932	KO_1Way down vs WT_12mo	-1.47155	1.24013	-0.123425	Gnaq	Gnaq	guanine nucleotide binding protein, alpha q polypeptide	Gnaq	14682	14682	19 A|19 11.01 cM	protein-coding	17.5646	17.5028	17.6263	-0.5σ	17.0431	17.5467	18.0103	17.8748	17.6564	17.1724	17.5685	17.5946	17.5036	17.6751
1000	1097	Q9JIY5	Htra2	5	5	21.2249	21.1291	0.530509	1.06868	1.06868	KO_1Way up vs WT_12mo	-1.18204	1.34999	0.095834	Htra2	Htra2	HtrA serine peptidase 2	Htra2	64704	64704	6 C3|6 35.94 cM	protein-coding	21.177	21.1291	21.2249	+0.5σ	20.6721	21.3361	21.1413	21.1087	21.3871	20.9347	21.2958	21.3418	21.2601	21.2921
335	1098	Q9CR61	Ndufb7	5	5	24.7597	24.7336	0.530794	1.01827	1.01827	KO_1Way up vs WT_12mo	-1.04668	1.08527	0.026118	Ndufb7	Ndufb7	NADH:ubiquinone oxidoreductase subunit B7	Ndufb7	66916	66916	8|8 C2	protein-coding	24.7466	24.7336	24.7597	+0.5σ	24.6961	24.822	24.7779	24.676	24.6961	24.8063	24.758	24.7959	24.7866	24.6517
1676	1099	Q9ESL4	Map3k20	5	5	17.6124	17.5322	0.530803	1.05711	1.05711	KO_1Way up vs WT_12mo	-1.15024	1.28537	0.0801256	Map3k20	Map3k20	mitogen-activated protein kinase kinase kinase 20	Map3k20	65964	65964	2|2 C3	protein-coding	17.5723	17.5322	17.6124	+0.5σ	17.4238	17.261	17.3499	17.8237	17.8028	17.5685	17.71	17.5134	17.6251	17.6448
1970	1100	P47915	Rpl29	5	5	15.8174	16.3564	0.532214	0.688244	-1.45297	KO_1Way down vs WT_12mo	-5.43826	2.57599	-0.539007	Rpl29	Rpl29	ribosomal protein L29	Rpl29	19944	19944	9|9 F1	protein-coding	16.0869	15.8174	16.3564	-2σ	17.4953	15.6302	16.143	16.2568	16.2568	17.496	16.0988	16.4658	12.9277	16.0988
282	1101	P35700	Prdx1	5	5	26.1429	26.1541	0.533454	0.992221	-1.00784	KO_1Way down vs WT_12mo	-1.03612	1.02006	-0.0112666	Prdx1	Prdx1	peroxiredoxin 1	Prdx1	18477	18477	4 D1|4 53.28 cM	protein-coding	26.1485	26.1429	26.1541	-0.5σ	26.1825	26.1434	26.1825	26.1188	26.1434	26.1553	26.1814	26.1424	26.1177	26.1177
219	1102	Q8BZF8	Pgm5	5	5	25.9534	26.0293	0.534117	0.948747	-1.05402	KO_1Way down vs WT_12mo	-1.27044	1.14355	-0.0759041	Pgm5	Pgm5	phosphoglucomutase 5	Pgm5	226041	226041	19|19 B	protein-coding	25.9914	25.9534	26.0293	-0.5σ	25.8113	26.0727	26.1434	26.1562	25.9628	25.5974	25.9546	26.0855	26.1673	25.962
1778	1103	P63082	Atp6v0c	5	5	20.2622	20.1523	0.535052	1.07917	1.07917	KO_1Way up vs WT_12mo	-1.21519	1.41523	0.109927	Atp6v0c	Atp6v0c	ATPase, H+ transporting, lysosomal V0 subunit C	Atp6v0c	11984	11984	17|17 A3.3	protein-coding	20.2072	20.1523	20.2622	+0.5σ	19.8983	20.4132	20.5839	19.7064	20.1596	20.193	20.301	20.3106	20.097	20.4093
1148	1104	P61358	Rpl27	5	5	22.5912	22.6702	0.535402	0.946756	-1.05624	KO_1Way down vs WT_12mo	-1.28345	1.15042	-0.0789361	Rpl27	Rpl27	ribosomal protein L27	Rpl27	19942	19942	11|11 D	protein-coding	22.6307	22.5912	22.6702	-0.5σ	22.375	23.0764	22.7393	22.5151	22.645	22.5633	22.5901	22.6909	22.5901	22.5218
1931	1105	Q5FW60	Mup20	5	5	18.7191	18.6473	0.535559	1.05105	1.05105	KO_1Way up vs WT_12mo	-1.13608	1.25503	0.07183	Mup20	Mup20	major urinary protein 20	Mup20	381530	381530	4|4 B3	protein-coding	18.6832	18.6473	18.7191	+0.5σ	18.4872	18.7487	18.9022	18.5522	18.5463	18.6113	18.9873	18.7644	18.7147	18.5179
1952	1106	B1AR17	Chd3	5	5	16.4977	16.3708	0.536256	1.09192	1.09192	KO_1Way up vs WT_12mo	-1.25344	1.49447	0.12687	Chd3	Chd3	chromodomain helicase DNA binding protein 3	Chd3	216848	216848	11|11 B3	protein-coding	16.4342	16.3708	16.4977	+0.5σ	16.6002	15.7617	16.4146	16.6435	16.434	16.4977	16.4817	16.601	16.0988	16.8092
464	1107	P80313	Cct7	5	5	22.2898	22.254	0.536848	1.02508	1.02508	KO_1Way up vs WT_12mo	-1.06584	1.11998	0.0357389	Cct7	Cct7	chaperonin containing Tcp1, subunit 7 (eta)	Cct7	12468	12468	6|6 C3	protein-coding	22.2719	22.254	22.2898	+0.5σ	22.1735	22.2696	22.2939	22.2873	22.2457	22.3988	22.39	22.1205	22.2852	22.2543
758	1108	P42208	Septin2	5	5	21.0474	20.8362	0.537685	1.15763	1.15763	KO_1Way up vs WT_12mo	-1.45919	1.95548	0.211178	Septin2	Septin2	septin 2	Septin2	18000	18000	1|1 D	protein-coding	20.9418	20.8362	21.0474	+1σ	20.3338	21.0027	21.5435	21.1705	20.1305	21.3345	21.5218	20.3867	20.9185	21.0753
1464	1109	Q9EQ06	Hsd17b11	5	5	17.6114	17.7681	0.538118	0.897055	-1.11476	KO_1Way down vs WT_12mo	-1.64569	1.3243	-0.156732	Hsd17b11	Hsd17b11	hydroxysteroid (17-beta) dehydrogenase 11	Hsd17b11	114664	114664	5|5 E5	protein-coding	17.6898	17.6114	17.7681	-0.5σ	17.2983	17.835	17.5192	17.9519	18.236	17.6979	18.2769	17.2995	17.3504	17.4322
788	1110	Q9JK53	Prelp	5	5	22.3011	22.2367	0.539103	1.04571	1.04571	KO_1Way up vs WT_12mo	-1.12296	1.22797	0.0644858	Prelp	Prelp	proline arginine-rich end leucine-rich repeat	Prelp	116847	116847	1 E4|1 58.02 cM	protein-coding	22.2689	22.2367	22.3011	+0.5σ	22.1296	22.0438	22.2745	22.2588	22.4766	22.0527	22.3389	22.2684	22.4156	22.4301
574	1111	Q9WVA4	Tagln2	5	5	25.235	25.1657	0.540558	1.04923	1.04923	KO_1Way up vs WT_12mo	-1.13351	1.24786	0.0693322	Tagln2	Tagln2	transgelin 2	Tagln2	21346	21346	1 H3|1 79.89 cM	protein-coding	25.2004	25.1657	25.235	+0.5σ	24.8845	25.0826	25.1608	25.2381	25.4622	25.352	25.1297	25.3649	25.2113	25.117
745	1112	Q9D1A2	Cndp2	5	5	21.836	21.8879	0.541683	0.964684	-1.03661	KO_1Way down vs WT_12mo	-1.18062	1.0987	-0.051872	Cndp2	Cndp2	CNDP dipeptidase 2 (metallopeptidase M20 family)	Cndp2	66054	66054	18|18 E4	protein-coding	21.862	21.836	21.8879	-0.5σ	21.9896	21.9435	21.7347	22.0262	21.7455	21.9427	21.9457	21.8709	21.7127	21.7082
877	1113	P11152	Lpl	5	5	20.9142	21.0089	0.542997	0.9365	-1.06781	KO_1Way down vs WT_12mo	-1.35494	1.18832	-0.0946492	Lpl	Lpl	lipoprotein lipase	Lpl	16956	16956	8 B3.3|8 33.88 cM	protein-coding	20.9615	20.9142	21.0089	-0.5σ	20.8917	20.8759	21.0166	21.3441	20.916	20.8085	21.2323	20.5449	21.1161	20.8692
1329	1114	Q9CPQ1	Cox6c	5	5	24.983	25.0602	0.544079	0.947899	-1.05496	KO_1Way down vs WT_12mo	-1.28181	1.15172	-0.0771943	Cox6c	Cox6c	cytochrome c oxidase subunit 6C	Cox6c	12864	12864	15|15 B3.1	protein-coding	25.0216	24.983	25.0602	-0.5σ	25.3531	25.2128	24.9374	25.0613	24.7362	25.0814	25.0701	25.0418	24.9535	24.7681
1564	1115	Q3U125	Prxl2a	5	5	18.5386	18.4396	0.544428	1.07109	1.07109	KO_1Way up vs WT_12mo	-1.19905	1.3756	0.0990812	Prxl2a	Prxl2a	peroxiredoxin like 2A	Prxl2a	70564	70564	14|14 B	protein-coding	18.4891	18.4396	18.5386	+0.5σ	18.3343	18.4928	18.7677	18.3487	18.2543	18.9476	18.6837	18.3752	18.2117	18.475
1326	1116	P02535	Krt10	5	5	17.8308	17.5451	0.545211	1.21901	1.21901	KO_1Way up vs WT_12mo	-1.6903	2.51177	0.285712	Krt10	Krt10	keratin 10	Krt10	16661	16661	11 D|11 62.92 cM	protein-coding	17.688	17.5451	17.8308	+1σ	19.068	17.2103	16.7377	17.5377	17.1717	17.8082	17.9308	18.0924	18.2664	17.0562
97	1117	P35486	Pdha1	5	5	27.491	27.5186	0.54522	0.981043	-1.01932	KO_1Way down vs WT_12mo	-1.09309	1.05204	-0.0276115	Pdha1	Pdha1	pyruvate dehydrogenase E1 alpha 1	Pdha1	18597	18597	X F4|X 73.95 cM	protein-coding	27.5048	27.491	27.5186	-0.5σ	27.521	27.595	27.4852	27.5506	27.4411	27.5501	27.594	27.4218	27.4671	27.4218
809	1118	P47757	Capzb	5	5	21.0907	21.0115	0.546405	1.05643	1.05643	KO_1Way up vs WT_12mo	-1.15732	1.29161	0.079194	Capzb	Capzb	capping protein (actin filament) muscle Z-line, beta	Capzb	12345	12345	4 D3|4 70.59 cM	protein-coding	21.0511	21.0115	21.0907	+0.5σ	20.8965	20.9278	21.0122	20.8447	21.3761	20.7715	21.1677	21.1009	21.2214	21.1919
815	1119	Q6R0H7	Gnas	5	5	19.8482	19.9324	0.54676	0.943335	-1.06007	KO_1Way down vs WT_12mo	-1.31275	1.16819	-0.0841583	Gnas	Gnas	GNAS (guanine nucleotide binding protein, alpha stimulating) complex locus	Gnas	14683	14683	2 H4|2 97.89 cM	protein-coding	19.8903	19.8482	19.9324	-0.5σ	20.2435	19.9938	19.5794	19.9814	19.8637	19.7744	19.8243	19.611	19.9557	20.0756
1087	1120	P54797	Tango2	5	5	17.2571	17.4159	0.547138	0.89576	-1.11637	KO_1Way down vs WT_12mo	-1.67183	1.34146	-0.158815	Tango2	Tango2	transport and golgi organization 2	Tango2	27883	27883	16 A3|16 11.34 cM	protein-coding	17.3365	17.2571	17.4159	-0.5σ	16.5104	17.865	17.5025	17.7824	17.4192	17.2527	17.1724	17.1316	17.181	17.5478
1917	1121	G5E8T9	Hagh	5	5	17.588	17.792	0.547154	0.868169	-1.15185	KO_1Way down vs WT_12mo	-1.9348	1.45829	-0.203952	Hagh	Hagh	hydroxyacyl glutathione hydrolase	Hagh	14651	14651	17 A3.3|17 12.53 cM	protein-coding	17.69	17.588	17.792	-1σ	17.6613	17.8576	17.5997	17.6495	18.1918	17.7431	18.2072	17.6068	16.4349	17.9481
517	1122	P97384	Anxa11	5	5	23.2251	23.1816	0.547558	1.03062	1.03062	KO_1Way up vs WT_12mo	-1.08393	1.15131	0.0435056	Anxa11	Anxa11	annexin A11	Anxa11	11744	11744	14 A3|14 15.06 cM	protein-coding	23.2034	23.1816	23.2251	+0.5σ	23.2227	23.2227	23.325	23.0615	23.0764	23.4077	23.2208	23.1272	23.1704	23.1997
1065	1123	A0A1Y7VM56	Sirt5	5	5	17.7217	17.873	0.548814	0.90048	-1.11052	KO_1Way down vs WT_12mo	-1.63401	1.32496	-0.151234	Sirt5	Sirt5	sirtuin 5	Sirt5	68346	68346	13|13 A4	protein-coding	17.7974	17.7217	17.873	-0.5σ	17.7094	17.5377	18.0225	18.2258	17.8695	18.5413	17.4457	17.5609	17.6619	17.3988
1777	1124	Q7TR02	Olfr1222	5	5	19.7777	19.8702	0.549025	0.937886	-1.06623	KO_1Way down vs WT_12mo	-1.35055	1.18799	-0.0925149	Olfr1222	Olfr1222	olfactory receptor 1222	Olfr1222	258177	258177	2|2 E1	protein-coding	19.8239	19.7777	19.8702	-0.5σ	19.9772	20.0009	19.9539	19.8523	19.5668	19.7237	19.7526	19.4327	19.7695	20.21
1938	1125	A6H694	Lrrc63	5	5	16.7869	16.6753	0.549069	1.08044	1.08044	KO_1Way up vs WT_12mo	-1.23106	1.43709	0.111625	Lrrc63	Lrrc63	leucine rich repeat containing 63	Lrrc63	70859	70859	14 D3|14	protein-coding	16.7311	16.6753	16.7869	+0.5σ	16.6318	16.3948	16.5236	16.7956	17.0306	17.3282	16.6441	16.5373	16.6585	16.7664
1978	1126	A0A1L1SRX2	Ampd3	5	5	16.0083	16.1382	0.550124	0.91386	-1.09426	KO_1Way down vs WT_12mo	-1.52664	1.27495	-0.129955	Ampd3	Ampd3	adenosine monophosphate deaminase 3	Ampd3	11717	11717	7 E3|7 57.85 cM	protein-coding	16.0733	16.0083	16.1382	-0.5σ	16.143	16.0391	16.3033	15.8878	16.318	15.3038	15.9145	16.3039	16.1675	16.3518
549	1127	Q6ZQ38	Cand1	5	5	21.4961	21.535	0.550878	0.973381	-1.02735	KO_1Way down vs WT_12mo	-1.13531	1.07568	-0.0389235	Cand1	Cand1	cullin associated and neddylation disassociated 1	Cand1	71902	71902	10 D2|10 67.08 cM	protein-coding	21.5156	21.4961	21.535	-0.5σ	21.6616	21.4039	21.5961	21.4962	21.5173	21.5374	21.3268	21.5218	21.5078	21.5867
1132	1128	Q8BH80	Vapb	5	5	19.9896	19.893	0.551156	1.06924	1.06924	KO_1Way up vs WT_12mo	-1.19865	1.37038	0.0965857	Vapb	Vapb	vesicle-associated membrane protein, associated protein B and C	Vapb	56491	56491	2 H4|2 97.37 cM	protein-coding	19.9413	19.893	19.9896	+0.5σ	19.9091	20.3338	19.9475	19.5467	19.7279	19.8736	19.7329	20.1499	20.1653	20.0262
485	1129	P61750	Arf4	5	5	18.5727	18.6506	0.552045	0.947484	-1.05543	KO_1Way down vs WT_12mo	-1.28962	1.15773	-0.0778267	Arf4	Arf4	ADP-ribosylation factor 4	Arf4	11843	11843	14 A3|14 16.09 cM	protein-coding	18.6117	18.5727	18.6506	-0.5σ	18.9686	18.7967	18.4549	18.4928	18.5399	18.5906	18.6606	18.5413	18.3068	18.7644
1606	1130	P97450	Atp5j	5	5	17.6561	17.7588	0.552379	0.9313	-1.07377	KO_1Way down vs WT_12mo	-1.39907	1.21344	-0.102682	Atp5j	Atp5j	ATP synthase, H+ transporting, mitochondrial F0 complex, subunit F	Atp5j	11957	11957	16|16 C3.3	protein-coding	17.7075	17.6561	17.7588	-0.5σ	17.9586	17.5823	17.8028	17.5253	17.9249	17.9048	17.1415	17.9104	17.6329	17.691
1110	1131	E9PUY9	Eci2	5	5	20.5628	20.5012	0.55297	1.04363	1.04363	KO_1Way up vs WT_12mo	-1.12337	1.22354	0.0616156	Eci2	Eci2	enoyl-Coenzyme A delta isomerase 2	Eci2	23986	23986	13|13 A3.3	protein-coding	20.532	20.5012	20.5628	+0.5σ	20.4721	20.3209	20.5179	20.7232	20.4721	20.7137	20.3821	20.3773	20.6462	20.6948
1399	1132	Q3U962	Col5a2	5	5	18.6651	18.7714	0.554097	0.928944	-1.07649	KO_1Way down vs WT_12mo	-1.41762	1.22331	-0.106336	Col5a2	Col5a2	collagen, type V, alpha 2	Col5a2	12832	12832	1|1 C1.1	protein-coding	18.7183	18.6651	18.7714	-0.5σ	18.4205	18.8021	18.8538	18.9399	18.8409	18.2552	19.1317	18.5304	18.8094	18.5988
1201	1133	A0A0U1RPA0	Plekha7	5	5	17.0494	16.9624	0.55437	1.06214	1.06214	KO_1Way up vs WT_12mo	-1.17941	1.33053	0.0869684	Plekha7	Plekha7	pleckstrin homology domain containing, family A member 7	Plekha7	233765	233765	7|7 F1	protein-coding	17.0059	16.9624	17.0494	+0.5σ	17.3604	16.6777	16.9228	16.8082	17.0431	16.8764	16.8629	17.2527	17.1899	17.0651
1255	1134	Q922B2	Dars	5	5	19.0205	19.1124	0.554815	0.938295	-1.06576	KO_1Way down vs WT_12mo	-1.35256	1.19079	-0.0918871	Dars	Dars	aspartyl-tRNA synthetase	Dars	226414	226414	1|1 E3	protein-coding	19.0664	19.0205	19.1124	-0.5σ	19.1764	18.9301	18.9157	19.4653	19.0745	18.728	18.8324	19.1743	19.0346	19.3333
125	1135	Q9DCW4	Etfb	5	5	27.6058	27.649	0.556171	0.970485	-1.03041	KO_1Way down vs WT_12mo	-1.15309	1.08603	-0.0432222	Etfb	Etfb	electron transferring flavoprotein, beta polypeptide	Etfb	110826	110826	7 B3|7 28.25 cM	protein-coding	27.6274	27.6058	27.649	-0.5σ	27.595	27.7665	27.649	27.7665	27.4678	27.6818	27.6481	27.6818	27.5501	27.4671
1286	1136	Q8K010	Oplah	5	5	17.8556	17.6841	0.556842	1.12621	1.12621	KO_1Way up vs WT_12mo	-1.38846	1.76104	0.171471	Oplah	Oplah	5-oxoprolinase (ATP-hydrolysing)	Oplah	75475	75475	15|15 D3	protein-coding	17.7699	17.6841	17.8556	+0.5σ	16.8621	17.9098	17.9301	17.7528	17.9658	18.1485	17.7722	18.0451	17.1637	18.1485
747	1137	Q6P5F9	Xpo1	5	5	19.3955	19.3362	0.557065	1.042	1.042	KO_1Way up vs WT_12mo	-1.12041	1.21651	0.0593567	Xpo1	Xpo1	exportin 1	Xpo1	103573	103573	11|11 A3.2	protein-coding	19.3658	19.3362	19.3955	+0.5σ	19.253	19.5011	19.1701	19.507	19.2496	19.3041	19.4617	19.2911	19.6295	19.2911
1639	1138	P62309	Snrpg	5	5	19.2693	19.1697	0.557358	1.07147	1.07147	KO_1Way up vs WT_12mo	-1.2104	1.38959	0.0995853	Snrpg	Snrpg	small nuclear ribonucleoprotein polypeptide G	Snrpg	68011	68011	6|6 D1	protein-coding	19.2195	19.1697	19.2693	+0.5σ	19.079	18.8538	19.319	19.4044	19.1923	18.8783	19.4197	19.1526	19.2354	19.6604
1096	1139	Q9D024	Ccdc47	5	5	16.0404	16.1051	0.557423	0.956158	-1.04585	KO_1Way down vs WT_12mo	-1.23827	1.13207	-0.0646791	Ccdc47	Ccdc47	coiled-coil domain containing 47	Ccdc47	67163	67163	11|11 E1	protein-coding	16.0727	16.0404	16.1051	-0.5σ	15.9861	16.0236	16.2568	15.97	16.2888	16.0243	16.3039	15.8699	15.8885	16.1153
976	1140	Q61733	Mrps31	5	5	17.4634	17.344	0.558036	1.08627	1.08627	KO_1Way up vs WT_12mo	-1.25793	1.48435	0.119386	Mrps31	Mrps31	mitochondrial ribosomal protein S31	Mrps31	57312	57312	8|8 A2	protein-coding	17.4037	17.344	17.4634	+0.5σ	17.2204	17.0645	17.7658	17.3276	17.342	17.8657	17.7534	17.0315	17.4457	17.2209
985	1141	Q9CXI0	Coq5	5	5	20.8064	20.6888	0.559819	1.0849	1.0849	KO_1Way up vs WT_12mo	-1.25533	1.47754	0.117565	Coq5	Coq5	coenzyme Q5 methyltransferase	Coq5	52064	52064	5 F|5 56.03 cM	protein-coding	20.7476	20.6888	20.8064	+0.5σ	20.7688	20.735	20.9907	20.0884	20.8612	20.6462	20.6948	20.7137	21.2569	20.7204
106	1142	Q9DB77	Uqcrc2	5	5	28.0532	28.0905	0.560161	0.974452	-1.02622	KO_1Way down vs WT_12mo	-1.13209	1.07499	-0.0373375	Uqcrc2	Uqcrc2	ubiquinol cytochrome c reductase core protein 2	Uqcrc2	67003	67003	7|7 F2	protein-coding	28.0719	28.0532	28.0905	-0.5σ	28.1557	28.2075	27.9833	28.1227	27.9833	28.0537	28.1844	28.0061	28.0834	27.9383
704	1143	Q99KC8	Vwa5a	5	5	20.5331	20.4622	0.562646	1.05036	1.05036	KO_1Way up vs WT_12mo	-1.14853	1.26713	0.0708836	Vwa5a	Vwa5a	von Willebrand factor A domain containing 5A	Vwa5a	67776	67776	9|9 A5.1	protein-coding	20.4977	20.4622	20.5331	+0.5σ	20.865	20.1821	20.4069	20.459	20.3978	20.5254	20.5602	20.5417	20.6338	20.4042
377	1144	P05063	Aldoc	5	5	20.6815	20.4448	0.562707	1.17826	1.17826	KO_1Way up vs WT_12mo	-1.58797	2.20456	0.236656	Aldoc	Aldoc	aldolase C, fructose-bisphosphate	Aldoc	11676	11676	11 B5|11 46.74 cM	protein-coding	20.5632	20.4448	20.6815	+1σ	19.8773	20.01	21.0868	19.914	21.3361	20.7932	20.5554	21.2272	20.9662	19.8654
1224	1145	Q9D517	Agpat3	5	5	19.1417	19.2561	0.562708	0.92375	-1.08254	KO_1Way down vs WT_12mo	-1.46555	1.25057	-0.114426	Agpat3	Agpat3	1-acylglycerol-3-phosphate O-acyltransferase 3	Agpat3	28169	28169	10 C1|10 39.72 cM	protein-coding	19.1989	19.1417	19.2561	-0.5σ	19.3963	18.6304	19.447	19.319	19.4881	19.1211	19.2472	19.281	18.7496	19.3097
932	1146	P62071	Rras2	5	5	20.1108	20.0502	0.563032	1.04288	1.04288	KO_1Way up vs WT_12mo	-1.1258	1.22441	0.0605673	Rras2	Rras2	related RAS viral (r-ras) oncogene 2	Rras2	66922	66922	7|7 F1	protein-coding	20.0805	20.0502	20.1108	+0.5σ	19.8286	20.2332	19.914	20.0836	20.1916	20.0905	19.9605	19.992	20.2696	20.2413
43	1147	P05064	Aldoa	5	5	28.9596	28.974	0.563846	0.990052	-1.01005	KO_1Way down vs WT_12mo	-1.04948	1.02871	-0.0144242	Aldoa	Aldoa	aldolase A, fructose-bisphosphate	Aldoa	11674	11674	7|7 F3	protein-coding	28.9668	28.9596	28.974	-0.5σ	29.0017	29.0017	28.9324	29.0017	28.9324	28.9319	28.9319	29.001	28.9319	29.001
1128	1148	A0A1Y7VJN6	Ighg3	5	5	21.4415	21.3107	0.56448	1.0949	1.0949	KO_1Way up vs WT_12mo	-1.29333	1.55047	0.130805	Ighg3	Ighg3	Immunoglobulin heavy constant gamma 3	Ighg3	380795	380795	12|12 F1	other	21.3761	21.3107	21.4415	+0.5σ	21.2227	20.6682	21.5282	21.837	21.2972	21.8348	21.3071	21.3796	21.2869	21.399
880	1149	Q9Z1P6	Ndufa7	5	5	24.3713	24.2916	0.564909	1.05673	1.05673	KO_1Way up vs WT_12mo	-1.16976	1.30625	0.0796134	Ndufa7	Ndufa7	NADH:ubiquinone oxidoreductase subunit A7	Ndufa7	66416	66416	17|17 B1	protein-coding	24.3315	24.2916	24.3713	+0.5σ	24.5147	24.4211	24.1793	24.2714	24.0718	24.758	24.4138	24.3142	24.1852	24.1852
1278	1150	P30115	Gsta3	5	5	18.017	17.86	0.56516	1.1149	1.1149	KO_1Way up vs WT_12mo	-1.3625	1.69359	0.156918	Gsta3	Gsta3	glutathione S-transferase, alpha 3	Gsta3	14859	14859	1 A4|1 6.5 cM	protein-coding	17.9385	17.86	18.017	+0.5σ	18.2017	17.5253	17.3202	17.5889	18.6641	17.8701	18.0728	17.8242	18.0451	18.2727
748	1151	S4R2K9	Ank3	5	5	19.3435	19.2759	0.565416	1.04802	1.04802	KO_1Way up vs WT_12mo	-1.14283	1.25522	0.0676673	Ank3	Ank3	ankyrin 3, epithelial	Ank3	11735	11735	10 B5.3|10 36.1 cM	protein-coding	19.3097	19.2759	19.3435	+0.5σ	19.3247	19.2275	19.0148	19.185	19.6273	19.4327	19.4848	19.2654	19.3149	19.2199
1012	1152	Q61335	Bcap31	5	5	21.1017	21.0393	0.565457	1.04421	1.04421	KO_1Way up vs WT_12mo	-1.13107	1.2333	0.0624166	Bcap31	Bcap31	B cell receptor associated protein 31	Bcap31	27061	27061	X|X A7.3	protein-coding	21.0705	21.0393	21.1017	+0.5σ	21.2751	21.0818	20.806	21.1888	20.8447	21.2029	21.1161	21.1621	20.9264	21.1009
857	1153	O35381	Anp32a	5	5	22.3385	22.2747	0.565781	1.0452	1.0452	KO_1Way up vs WT_12mo	-1.13428	1.23914	0.0637802	Anp32a	Anp32a	acidic (leucine-rich) nuclear phosphoprotein 32 family, member A	Anp32a	11737	11737	9 B|9 33.68 cM	protein-coding	22.3066	22.2747	22.3385	+0.5σ	22.1364	22.0587	22.3677	22.3711	22.4397	22.573	22.1149	22.3988	22.2543	22.3514
235	1154	Q9JJZ2	Tuba8	5	5	19.2373	19.1139	0.566423	1.08933	1.08933	KO_1Way up vs WT_12mo	-1.27689	1.51522	0.123446	Tuba8	Tuba8	tubulin, alpha 8	Tuba8	53857	53857	6|6 F1	protein-coding	19.1756	19.1139	19.2373	+0.5σ	18.5463	19.3025	19.0393	19.3963	19.2851	19.521	19.6158	18.9476	19.012	19.0903
1857	1155	P62869	Elob	5	5	18.0336	18.1456	0.566593	0.925338	-1.08069	KO_1Way down vs WT_12mo	-1.45789	1.24832	-0.111948	Elob	Elob	elongin B	Elob	67673	67673	17|17 A3.3	protein-coding	18.0896	18.0336	18.1456	-0.5σ	18.0395	18.3343	18.4781	17.5192	18.3567	17.8901	17.9722	18.2367	17.8901	18.179
855	1156	Q8K4Z3	Naxe	5	5	21.9637	21.9114	0.569728	1.03689	1.03689	KO_1Way up vs WT_12mo	-1.11039	1.19383	0.0522637	Naxe	Naxe	NAD(P)HX epimerase	Naxe	246703	246703	3|3 F1	protein-coding	21.9376	21.9114	21.9637	+0.5σ	21.7313	22.084	21.9604	21.9184	21.8631	21.9057	21.8962	22.2287	21.8766	21.9114
22	1157	Q5SX39	Myh4	5	5	22.6355	22.5674	0.570326	1.04839	1.04839	KO_1Way up vs WT_12mo	-1.1467	1.26037	0.0681791	Myh4	Myh4	myosin, heavy polypeptide 4, skeletal muscle	Myh4	17884	17884	11 B3|11 40.59 cM	protein-coding	22.6014	22.5674	22.6355	+0.5σ	22.6249	22.7003	22.6354	22.2512	22.6249	22.9179	22.6394	22.6746	22.4384	22.5075
401	1158	A0A0G2JGS4	Camk2d	5	5	22.9497	22.9986	0.571035	0.966681	-1.03447	KO_1Way down vs WT_12mo	-1.18078	1.10341	-0.0488881	Camk2d	Camk2d	calcium/calmodulin-dependent protein kinase II, delta	Camk2d	108058	108058	3|3 G1- G2	protein-coding	22.9742	22.9497	22.9986	-0.5σ	22.8238	22.9016	23.1585	22.9073	23.2018	22.9	22.8606	22.9769	22.9582	23.0528
1062	1159	D3Z722	Rps19	5	5	22.4153	22.4696	0.571367	0.963091	-1.03832	KO_1Way down vs WT_12mo	-1.20268	1.11554	-0.0542564	Rps19	Rps19	ribosomal protein S19	Rps19	20085	20085	7|7 A3	protein-coding	22.4425	22.4153	22.4696	-0.5σ	22.6926	22.3569	22.4614	22.6004	22.2365	22.3472	22.4882	22.5277	22.41	22.3035
65	1160	Q9QXS1	Plec	5	5	24.8248	24.8605	0.571384	0.975577	-1.02503	KO_1Way down vs WT_12mo	-1.12901	1.07454	-0.035672	Plec	Plec	plectin	Plec	18810	18810	15 D3|15 35.48 cM	protein-coding	24.8426	24.8248	24.8605	-0.5σ	24.9552	24.7882	24.8082	24.8378	24.9133	24.9349	24.7064	24.8943	24.8943	24.6943
1734	1161	O70439	Stx7	5	5	17.9652	18.0574	0.571765	0.938076	-1.06601	KO_1Way down vs WT_12mo	-1.36884	1.20456	-0.0922237	Stx7	Stx7	syntaxin 7	Stx7	53331	53331	10|10 A4	protein-coding	18.0113	17.9652	18.0574	-0.5σ	17.6392	18.0787	18.3377	18.1918	18.0395	18.3121	17.691	17.8359	18.0342	17.9526
473	1162	P47934	Crat	5	5	23.0186	23.0621	0.572424	0.970339	-1.03057	KO_1Way down vs WT_12mo	-1.15962	1.09185	-0.0434387	Crat	Crat	carnitine acetyltransferase	Crat	12908	12908	2 B|2 21.69 cM	protein-coding	23.0404	23.0186	23.0621	-0.5σ	23.054	23.2727	22.9503	22.9503	23.0831	23.1468	22.906	22.9828	23.094	22.9635
1050	1163	P60766	Cdc42	5	5	19.1653	19.2271	0.572658	0.958021	-1.04382	KO_1Way down vs WT_12mo	-1.23495	1.13344	-0.061871	Cdc42	Cdc42	cell division cycle 42	Cdc42	12540	12540	4 D3|4 69.83 cM	protein-coding	19.1962	19.1653	19.2271	-0.5σ	19.335	19.246	19.2109	19.1162	19.2275	19.012	19.2993	18.8703	19.2249	19.4197
1071	1164	Q9WVL0	Gstz1	5	5	17.233	17.3566	0.572712	0.917882	-1.08947	KO_1Way down vs WT_12mo	-1.52454	1.28444	-0.12362	Gstz1	Gstz1	glutathione transferase zeta 1 (maleylacetoacetate isomerase)	Gstz1	14874	14874	12|12 D2	protein-coding	17.2948	17.233	17.3566	-0.5σ	17.0306	17.5889	17.4452	16.9526	17.7658	17.3893	17.3428	17.4821	16.698	17.2527
1892	1165	Q8CGA0	Ppm1f	5	5	16.1629	16.2102	0.576122	0.96772	-1.03336	KO_1Way down vs WT_12mo	-1.17664	1.1019	-0.0473388	Ppm1f	Ppm1f	protein phosphatase 1F (PP2C domain containing)	Ppm1f	68606	68606	16|16 A3	protein-coding	16.1866	16.1629	16.2102	-0.5σ	16.1805	16.1805	16.1147	16.3948	16.1805	16.0395	16.2575	15.9705	16.2895	16.2575
828	1166	O08547	Sec22b	5	5	21.505	21.4701	0.576627	1.02451	1.02451	KO_1Way up vs WT_12mo	-1.07436	1.12766	0.0349294	Sec22b	Sec22b	SEC22 homolog B, vesicle trafficking protein	Sec22b	20333	20333	3|3 F2.2	protein-coding	21.4875	21.4701	21.505	+0.5σ	21.593	21.4442	21.4039	21.4731	21.4365	21.6471	21.5911	21.3672	21.4662	21.4536
1013	1167	E9QQ93	Xirp1	5	5	20.1823	20.2334	0.578391	0.965226	-1.03603	KO_1Way down vs WT_12mo	-1.1928	1.11129	-0.0510618	Xirp1	Xirp1	xin actin-binding repeat containing 1	Xirp1	22437	22437	9|9 F4	protein-coding	20.2079	20.1823	20.2334	-0.5σ	20.4899	20.1259	20.1485	20.314	20.0884	20.1747	20.3352	20.1154	20.0644	20.2218
1702	1168	Q3UMF0	Cobll1	5	5	17.6242	17.5249	0.57954	1.07126	1.07126	KO_1Way up vs WT_12mo	-1.22884	1.41021	0.0993081	Cobll1	Cobll1	Cobl-like 1	Cobll1	319876	319876	2|2 C1.3	protein-coding	17.5745	17.5249	17.6242	+0.5σ	17.6321	17.7716	17.252	17.7583	17.2103	17.7296	17.9977	17.4196	17.312	17.6619
674	1169	Q61768	Kif5b	5	5	21.1435	21.2313	0.579669	0.940899	-1.06281	KO_1Way down vs WT_12mo	-1.35567	1.20016	-0.0878882	Kif5b	Kif5b	kinesin family member 5B	Kif5b	16573	16573	18 A1|18 4.46 cM	protein-coding	21.1874	21.1435	21.2313	-0.5σ	21.6199	21.2682	20.8556	21.4512	20.9618	21.2082	21.179	21.1548	20.9511	21.2242
832	1170	O35857	Timm44	5	5	21.7164	21.7771	0.57973	0.958822	-1.04295	KO_1Way down vs WT_12mo	-1.23376	1.13425	-0.0606656	Timm44	Timm44	translocase of inner mitochondrial membrane 44	Timm44	21856	21856	8 A1.1|8 1.99 cM	protein-coding	21.7467	21.7164	21.7771	-0.5σ	21.5961	21.9604	21.9435	21.6199	21.7653	21.6993	21.4985	21.9377	21.7744	21.6721
1930	1171	Q8CFJ9	Wdr24	5	5	18.5281	18.5958	0.580769	0.95411	-1.0481	KO_1Way down vs WT_12mo	-1.26517	1.15171	-0.0677722	Wdr24	Wdr24	WD repeat domain 24	Wdr24	268933	268933	17|17 A3.3	protein-coding	18.5619	18.5281	18.5958	-0.5σ	18.522	18.8741	18.2717	18.6963	18.615	18.3871	18.6076	18.3713	18.6837	18.5906
518	1172	P63242	Eif5a	5	5	22.4287	22.379	0.582399	1.03507	1.03507	KO_1Way up vs WT_12mo	-1.10988	1.1891	0.0497295	Eif5a	Eif5a	eukaryotic translation initiation factor 5A	Eif5a	276770	276770	11|11 B3	protein-coding	22.4038	22.379	22.4287	+0.5σ	22.0974	22.565	22.4439	22.3529	22.4359	22.4593	22.4218	22.5528	22.3807	22.3291
1648	1173	P62320	Snrpd3	5	5	19.7216	19.81	0.583185	0.940603	-1.06315	KO_1Way down vs WT_12mo	-1.36097	1.2041	-0.088342	Snrpd3	Snrpd3	small nuclear ribonucleoprotein D3	Snrpd3	67332	67332	10|10 C1	protein-coding	19.7658	19.7216	19.81	-0.5σ	19.9679	19.8163	20.1193	19.3247	19.8219	19.8812	19.5878	19.8607	19.4895	19.7891
1856	1174	P08905	Lyz2	5	5	17.7852	17.7265	0.583303	1.04146	1.04146	KO_1Way up vs WT_12mo	-1.1312	1.22695	0.0586114	Lyz2	Lyz2	lysozyme 2	Lyz2	17105	17105	10 D2|10 65.34 cM	protein-coding	17.7558	17.7265	17.7852	+0.5σ	17.8472	17.795	17.8576	17.6443	17.4887	17.8836	17.5556	17.9526	17.8657	17.6683
702	1175	P05977	Myl1	5	5	21.2165	21.3344	0.583412	0.921555	-1.08512	KO_1Way down vs WT_12mo	-1.50889	1.28144	-0.117858	Myl1	Myl1	myosin, light polypeptide 1	Myl1	17901	17901	1 C3|1 33.71 cM	protein-coding	21.2754	21.2165	21.3344	-0.5σ	21.0519	21.7831	21.4962	21.3914	20.9493	21.5622	20.9882	21.3071	21.4212	20.8039
304	1176	P62141	Ppp1cb	5	5	23.1901	23.1641	0.586244	1.01818	1.01818	KO_1Way up vs WT_12mo	-1.0568	1.09557	0.02599	Ppp1cb	Ppp1cb	protein phosphatase 1 catalytic subunit beta	Ppp1cb	19046	19046	5|5 B1	protein-coding	23.1771	23.1641	23.1901	+0.5σ	23.1225	23.2018	23.1663	23.0701	23.2597	23.1018	23.1917	23.1839	23.3026	23.1704
1279	1177	G3X925	Pklr	5	5	18.678	18.5604	0.586288	1.08495	1.08495	KO_1Way up vs WT_12mo	-1.28413	1.51157	0.117627	Pklr	Pklr	pyruvate kinase liver and red blood cell	Pklr	18770	18770	3 F1|3 39.01 cM	protein-coding	18.6192	18.5604	18.678	+0.5σ	18.4972	18.7095	17.865	18.7904	18.9399	18.8594	18.4105	18.8783	18.6606	18.5813
909	1178	Q9WVE8	Pacsin2	5	5	20.1991	20.2542	0.588809	0.962536	-1.03892	KO_1Way down vs WT_12mo	-1.21477	1.12546	-0.0550873	Pacsin2	Pacsin2	protein kinase C and casein kinase substrate in neurons 2	Pacsin2	23970	23970	15|15 E1	protein-coding	20.2266	20.1991	20.2542	-0.5σ	20.4132	20.1305	20.3256	20.1951	20.2064	20.2413	20.4093	19.916	20.2962	20.1326
840	1179	P60229	Eif3e	5	5	18.1405	18.0729	0.589702	1.04792	1.04792	KO_1Way up vs WT_12mo	-1.15646	1.26996	0.0675337	Eif3e	Eif3e	eukaryotic translation initiation factor 3, subunit E	Eif3e	16341	16341	15 B3.2|15 16.73 cM	protein-coding	18.1067	18.0729	18.1405	+0.5σ	18.211	18.0444	18.3833	17.8825	17.8435	18.0404	18.2209	17.9598	18.3266	18.1548
166	1180	P48962	Slc25a4	5	5	30.441	30.4823	0.591354	0.971738	-1.02908	KO_1Way down vs WT_12mo	-1.15824	1.0937	-0.0413605	Slc25a4	Slc25a4	solute carrier family 25 (mitochondrial carrier, adenine nucleotide translocator), member 4	Slc25a4	11739	11739	8 B1.1|8 26.22 cM	protein-coding	30.4616	30.441	30.4823	-0.5σ	30.6111	30.6111	30.3399	30.5096	30.3399	30.5092	30.5092	30.3386	30.3386	30.5092
316	1181	P48787	Tnni3	5	5	27.4296	27.5741	0.594808	0.90464	-1.10541	KO_1Way down vs WT_12mo	-1.67778	1.37305	-0.144584	Tnni3	Tnni3	troponin I, cardiac 3	Tnni3	21954	21954	7 A1|7 2.61 cM	protein-coding	27.5019	27.4296	27.5741	-0.5σ	26.9263	27.567	28.2075	27.521	27.649	27.0702	26.9913	27.7023	27.6818	27.7023
189	1182	F8VPN4	Agl	5	5	25.4141	25.3965	0.595754	1.01224	1.01224	KO_1Way up vs WT_12mo	-1.03936	1.06495	0.0175454	Agl	Agl	amylo-1,6-glucosidase, 4-alpha-glucanotransferase	Agl	77559	77559	3|3 G1	protein-coding	25.4053	25.3965	25.4141	+0.5σ	25.3234	25.4389	25.4622	25.3665	25.3915	25.4174	25.4486	25.3378	25.4377	25.4287
570	1183	Q62009	Postn	5	5	20.4114	20.4967	0.596901	0.942563	-1.06094	KO_1Way down vs WT_12mo	-1.35916	1.20751	-0.0853398	Postn	Postn	periostin, osteoblast specific factor	Postn	50706	50706	3|3 C	protein-coding	20.454	20.4114	20.4967	-0.5σ	20.7997	20.1596	20.1453	20.5839	20.7952	20.3904	20.2452	20.5661	20.4604	20.3949
945	1184	P56380	Nudt2	5	5	19.8774	19.9309	0.597388	0.963592	-1.03778	KO_1Way down vs WT_12mo	-1.21241	1.12573	-0.0535056	Nudt2	Nudt2	nudix (nucleoside diphosphate linked moiety X)-type motif 2	Nudt2	66401	66401	4|4 A5	protein-coding	19.9042	19.8774	19.9309	-0.5σ	19.8092	20.1521	19.991	19.6504	20.0521	19.992	19.8112	19.78	19.888	19.916
1478	1185	Q78J03	Msrb2	5	5	19.2504	19.208	0.598106	1.0298	1.0298	KO_1Way up vs WT_12mo	-1.09858	1.16504	0.0423662	Msrb2	Msrb2	methionine sulfoxide reductase B2	Msrb2	76467	76467	2|2 A3	protein-coding	19.2292	19.208	19.2504	+0.5σ	19.0719	19.2941	19.2941	19.2185	19.1613	19.4433	19.1626	19.2505	19.3262	19.0692
337	1186	Q8CIB5	Fermt2	5	5	25.1988	25.2466	0.598446	0.967364	-1.03374	KO_1Way down vs WT_12mo	-1.18854	1.11223	-0.0478686	Fermt2	Fermt2	fermitin family member 2	Fermt2	218952	218952	14|14 C1	protein-coding	25.2227	25.1988	25.2466	-0.5σ	25.2257	25.0928	25.3443	25.3915	25.1789	24.9668	25.2623	25.1376	25.3649	25.2623
303	1187	E9Q6A3	Sorbs1	5	5	19.8235	19.7352	0.598958	1.06312	1.06312	KO_1Way up vs WT_12mo	-1.21725	1.37578	0.0883102	Sorbs1	Sorbs1	sorbin and SH3 domain containing 1	Sorbs1	20411	20411	19 C3|19 34.25 cM	protein-coding	19.7794	19.7352	19.8235	+0.5σ	19.768	19.8416	19.7207	19.8937	19.4521	19.6158	19.8736	19.4667	19.8607	20.301
114	1188	Q8K1M6	Dnm1l	5	5	23.4281	23.4003	0.6	1.01944	1.01944	KO_1Way up vs WT_12mo	-1.06404	1.10582	0.0277791	Dnm1l	Dnm1l	dynamin 1-like	Dnm1l	74006	74006	16|16 A2	protein-coding	23.4142	23.4003	23.4281	+0.5σ	23.2465	23.5036	23.4828	23.3881	23.3804	23.4588	23.4742	23.3618	23.4588	23.3868
1419	1189	Q8VE95	C030006K11Rik	5	5	20.0473	20.099	0.600429	0.96479	-1.0365	KO_1Way down vs WT_12mo	-1.20615	1.12271	-0.0517133	C030006K11Rik	C030006K11Rik	RIKEN cDNA C030006K11 gene	C030006K11Rik	223665	223665	15|15 D3	protein-coding	20.0731	20.0473	20.099	-0.5σ	19.9586	20.1875	20.071	20.3638	19.914	19.9332	20.0471	20.21	19.9657	20.0804
1253	1190	Q3U7R1	Esyt1	5	5	14.1716	14.3917	0.600661	0.858513	-1.1648	KO_1Way down vs WT_12mo	-2.22137	1.63725	-0.220088	Esyt1	Esyt1	extended synaptotagmin-like protein 1	Esyt1	23943	23943	10|10 D3	protein-coding	14.2817	14.1716	14.3917	-1σ	14.9012	14.6142	14.6142	14.9012	12.9277	14.6512	14.1237	14.2134	13.6565	14.2134
503	1191	Q61937	Npm1	5	5	21.0091	21.052	0.601329	0.970689	-1.0302	KO_1Way down vs WT_12mo	-1.16868	1.10118	-0.0429193	Npm1	Npm1	nucleophosmin 1	Npm1	18148	18148	11|11 A4	protein-coding	21.0306	21.0091	21.052	-0.5σ	21.0868	20.8447	21.2823	20.9377	21.1087	21.0329	21.0711	20.9295	21.0185	20.9937
72	1192	P60710	Actb	5	5	28.5253	28.562	0.601615	0.974842	-1.02581	KO_1Way down vs WT_12mo	-1.14293	1.08614	-0.0367591	Actb	Actb	actin, beta	Actb	11461	11461	5 G2|5 81.8 cM	protein-coding	28.5436	28.5253	28.562	-0.5σ	28.5532	28.6191	28.6191	28.6191	28.3997	28.3767	28.5528	28.6471	28.4311	28.6187
1056	1193	Q9CR57	Rpl14	5	5	21.9037	21.8651	0.601837	1.02714	1.02714	KO_1Way up vs WT_12mo	-1.0908	1.1508	0.03863	Rpl14	Rpl14	ribosomal protein L14	Rpl14	67115	67115	9|9 F4	protein-coding	21.8844	21.8651	21.9037	+0.5σ	21.6916	21.9946	21.8631	21.9844	21.7919	21.9275	21.8613	21.7673	22.0104	21.9522
1590	1194	Q9D832	Dnajb4	5	5	16.0796	15.6478	0.601844	1.34891	1.34891	KO_1Way up vs WT_12mo	-2.64179	4.80689	0.431793	Dnajb4	Dnajb4	DnaJ heat shock protein family (Hsp40) member B4	Dnajb4	67035	67035	3|3 H3	protein-coding	15.8637	15.6478	16.0796	+2σ	17.1405	16.4969	14.4922	15.9861	14.1235	17.0724	17.2209	16.1814	14.2134	15.71
329	1195	Q9CR62	Slc25a11	5	5	26.1241	26.1031	0.601995	1.01464	1.01464	KO_1Way up vs WT_12mo	-1.04833	1.07925	0.0209681	Slc25a11	Slc25a11	solute carrier family 25 (mitochondrial carrier oxoglutarate carrier), member 11	Slc25a11	67863	67863	11 B3|11 43.21 cM	protein-coding	26.1136	26.1031	26.1241	+0.5σ	26.0376	26.1825	26.1188	26.1038	26.0727	26.2115	26.1673	26.1023	26.0368	26.1023
268	1196	Q9CQV8	Ywhab	5	5	24.5393	24.5111	0.603635	1.0197	1.0197	KO_1Way up vs WT_12mo	-1.06581	1.10822	0.0281454	Ywhab	Ywhab	tyrosine 3-monooxygenase/tryptophan 5-monooxygenase activation protein, beta polypeptide	Ywhab	54401	54401	2|2 H3	protein-coding	24.5252	24.5111	24.5393	+0.5σ	24.5731	24.3373	24.4996	24.5147	24.6309	24.5574	24.4818	24.5844	24.5404	24.5323
527	1197	Q9CPP6	Ndufa5	5	5	23.9463	23.9758	0.604085	0.979755	-1.02066	KO_1Way down vs WT_12mo	-1.11387	1.06922	-0.0295072	Ndufa5	Ndufa5	NADH:ubiquinone oxidoreductase subunit A5	Ndufa5	68202	68202	6|6 A3.1	protein-coding	23.9611	23.9463	23.9758	-0.5σ	23.9727	23.9815	23.9727	24.1254	23.8265	23.855	23.9445	24.0278	23.952	23.952
1009	1198	Q62425	Ndufa4	5	5	25.7714	25.7391	0.604156	1.02268	1.02268	KO_1Way up vs WT_12mo	-1.07618	1.12555	0.0323561	Ndufa4	Ndufa4	Ndufa4, mitochondrial complex associated	Ndufa4	17992	17992	6|6 A1	protein-coding	25.7553	25.7391	25.7714	+0.5σ	25.641	25.7305	25.684	25.9557	25.684	25.7429	25.8005	25.8418	25.7429	25.729
1121	1199	P39447	Tjp1	5	5	18.0791	18.029	0.604541	1.03534	1.03534	KO_1Way up vs WT_12mo	-1.12059	1.20119	0.050106	Tjp1	Tjp1	tight junction protein 1	Tjp1	21872	21872	7 C|7 35.02 cM	protein-coding	18.0541	18.029	18.0791	+0.5σ	18.1416	18.1711	17.8748	18.0273	17.9301	17.9356	17.8701	18.1755	18.2025	18.2117
487	1200	P17427	Ap2a2	5	5	20.9835	21.0264	0.605994	0.970657	-1.03023	KO_1Way down vs WT_12mo	-1.17084	1.10313	-0.0429672	Ap2a2	Ap2a2	adaptor-related protein complex 2, alpha 2 subunit	Ap2a2	11772	11772	7|7 F5	protein-coding	21.005	20.9835	21.0264	-0.5σ	21.1132	20.9493	21.1765	20.9254	20.9678	20.9235	21.0622	20.7659	21.1112	21.0544
1799	1201	Q9DAW9	Cnn3	5	5	17.2109	17.2668	0.606549	0.961982	-1.03952	KO_1Way down vs WT_12mo	-1.22816	1.13655	-0.0559189	Cnn3	Cnn3	calponin 3, acidic	Cnn3	71994	71994	3|3 G1	protein-coding	17.2388	17.2109	17.2668	-0.5σ	17.342	17.252	17.3816	17.238	17.1203	17.181	16.9375	17.4399	17.3988	17.097
25	1202	G3UW82	Myh2	5	5	20.4343	20.2232	0.606755	1.1576	1.1576	KO_1Way up vs WT_12mo	-1.62203	2.17359	0.21114	Myh2	Myh2	myosin, heavy polypeptide 2, skeletal muscle, adult	Myh2	17882	17882	11 B3|11 40.59 cM	protein-coding	20.3287	20.2232	20.4343	+1σ	20.5469	18.8144	20.6771	20.9004	20.1771	20.5694	20.8257	20.3381	20.4163	20.022
1646	1203	O70400	Pdlim1	5	5	17.8757	17.7637	0.606931	1.08074	1.08074	KO_1Way up vs WT_12mo	-1.29274	1.50991	0.112013	Pdlim1	Pdlim1	PDZ and LIM domain 1 (elfin)	Pdlim1	54132	54132	19|19 C3	protein-coding	17.8197	17.7637	17.8757	+0.5σ	17.795	17.852	18.0681	17.4592	17.6443	17.1899	18.0282	18.0342	18.2607	17.8657
278	1204	K3W4R2	Myh14	5	5	22.3943	22.3456	0.607087	1.03435	1.03435	KO_1Way up vs WT_12mo	-1.11825	1.19641	0.0487303	Myh14	Myh14	myosin, heavy polypeptide 14	Myh14	71960	71960	7|7 B3	protein-coding	22.3699	22.3456	22.3943	+0.5σ	22.4439	22.2745	22.2207	22.4178	22.3711	22.1398	22.4752	22.6282	22.3339	22.3945
939	1205	P55264	Adk	5	5	20.7857	20.7359	0.607819	1.03507	1.03507	KO_1Way up vs WT_12mo	-1.12115	1.20115	0.0497228	Adk	Adk	adenosine kinase	Adk	11534	11534	14|14 A3	protein-coding	20.7608	20.7359	20.7857	+0.5σ	20.7535	20.865	20.459	20.7997	20.8025	20.8735	20.9235	20.7255	20.5863	20.8195
397	1206	Q8CBB6	H2bc23	5	5	27.9922	27.9598	0.608002	1.02268	1.02268	KO_1Way up vs WT_12mo	-1.07729	1.1267	0.0323503	H2bc23	H2bc23	H2B clustered histone 23	H2bc23	665596	665596	13|13 A3.1	protein-coding	27.976	27.9598	27.9922	+0.5σ	27.9559	27.8701	27.9112	27.9392	28.1227	28.0061	28.0252	27.9383	27.8693	28.1219
1011	1207	P16015	Car3	5	5	21.748	21.8217	0.608805	0.950203	-1.05241	KO_1Way down vs WT_12mo	-1.31292	1.18542	-0.0736928	Car3	Car3	carbonic anhydrase 3	Car3	12350	12350	3 A1|3 3.22 cM	protein-coding	21.7848	21.748	21.8217	-0.5σ	21.9289	21.6777	21.6242	21.6053	22.2725	21.6836	21.7382	21.8766	21.8613	21.5804
953	1208	A0A1Y7VJW9	Fbln5	5	5	20.2379	20.3081	0.609144	0.952498	-1.04987	KO_1Way down vs WT_12mo	-1.29641	1.17617	-0.0702122	Fbln5	Fbln5	fibulin 5	Fbln5	23876	23876	12|12 E	protein-coding	20.273	20.2379	20.3081	-0.5σ	20.1558	20.3567	20.3754	20.4967	20.1558	19.916	20.1326	20.3352	20.6039	20.2017
1500	1209	Q80UU9	Pgrmc2	5	5	17.7488	17.6606	0.609555	1.06301	1.06301	KO_1Way up vs WT_12mo	-1.22636	1.38577	0.0881574	Pgrmc2	Pgrmc2	progesterone receptor membrane component 2	Pgrmc2	70804	70804	3|3 B	protein-coding	17.7047	17.6606	17.7488	+0.5σ	17.606	18.1592	17.6903	17.3885	17.4592	17.64	17.9666	17.9144	17.783	17.4399
116	1210	A0A0R4J0I1	Serpina3k	5	5	27.086	27.0175	0.609597	1.04863	1.04863	KO_1Way up vs WT_12mo	-1.17184	1.28857	0.0684997	Serpina3k	Serpina3k	serine (or cysteine) peptidase inhibitor, clade A, member 3K	Serpina3k	20714	20714	12 E|12 53.99 cM	protein-coding	27.0517	27.0175	27.086	+0.5σ	27.4228	26.8566	27.0251	26.8431	26.9398	27.1994	27.0702	26.8424	27.0527	27.2653
1100	1211	Q99JI4	Psmd6	5	5	20.2106	20.1461	0.61068	1.04577	1.04577	KO_1Way up vs WT_12mo	-1.16191	1.2707	0.0645638	Psmd6	Psmd6	proteasome (prosome, macropain) 26S subunit, non-ATPase, 6	Psmd6	66413	66413	14|14 A1	protein-coding	20.1783	20.1461	20.2106	+0.5σ	20.1081	20.0449	20.029	20.1684	20.38	19.8187	20.3904	20.2753	20.3724	20.1965
1746	1212	Q9D0L7	Armc10	5	5	16.2107	16.3644	0.611433	0.89891	-1.11246	KO_1Way down vs WT_12mo	-1.77091	1.43097	-0.153751	Armc10	Armc10	armadillo repeat containing 10	Armc10	67211	67211	5|5 A3	protein-coding	16.2875	16.2107	16.3644	-0.5σ	17.0123	16.3695	16.3948	16.5104	15.5351	16.7835	16.1435	16.2454	16.1435	15.7375
385	1213	Q9CZR8	Tsfm	5	5	21.6155	21.6523	0.614028	0.974787	-1.02587	KO_1Way down vs WT_12mo	-1.14771	1.09057	-0.0368413	Tsfm	Tsfm	Ts translation elongation factor, mitochondrial	Tsfm	66399	66399	10|10 D3	protein-coding	21.6339	21.6155	21.6523	-0.5σ	21.5051	21.6855	21.6136	21.6503	21.8071	21.5703	21.6109	21.6592	21.7708	21.4662
1575	1214	P11438	Lamp1	5	5	20.6211	20.5735	0.615589	1.03359	1.03359	KO_1Way up vs WT_12mo	-1.11944	1.19591	0.0476676	Lamp1	Lamp1	lysosomal-associated membrane protein 1	Lamp1	16783	16783	8 A1.1|8 5.73 cM	protein-coding	20.5973	20.5735	20.6211	+0.5σ	20.8353	20.4626	20.3848	20.6833	20.5014	20.6948	20.5796	20.5863	20.5119	20.7331
532	1215	P00920	Car2	5	5	22.3998	22.2948	0.61644	1.07546	1.07546	KO_1Way up vs WT_12mo	-1.28302	1.48396	0.104956	Car2	Car2	carbonic anhydrase 2	Car2	12349	12349	3 A1|3 3.23 cM	protein-coding	22.3473	22.2948	22.3998	+0.5σ	22.5151	22.4489	21.9896	22.0941	22.4265	22.8606	22.6855	21.8913	22.2191	22.3424
1474	1216	Q3UZG4	Aimp1	5	5	18.8858	18.7724	0.616539	1.08177	1.08177	KO_1Way up vs WT_12mo	-1.3091	1.53194	0.11339	Aimp1	Aimp1	aminoacyl tRNA synthetase complex-interacting multifunctional protein 1	Aimp1	13722	13722	3|3 G3	protein-coding	18.8291	18.7724	18.8858	+0.5σ	19.2109	18.6417	18.6304	18.7487	18.6304	19.3897	18.6384	19.2289	18.3801	18.7919
1290	1217	Q6ZQI3	Mlec	5	5	22.3723	22.2528	0.616648	1.08632	1.08632	KO_1Way up vs WT_12mo	-1.32823	1.56743	0.119448	Mlec	Mlec	malectin	Mlec	109154	109154	5 F|5 55.99 cM	protein-coding	22.3126	22.2528	22.3723	+0.5σ	22.3915	22.2772	22.2652	22.1888	22.1414	23.2516	21.9738	22.1622	22.2762	22.1975
1082	1218	Q9CQ69	Uqcrq	5	5	24.3639	24.402	0.617876	0.973926	-1.02677	KO_1Way down vs WT_12mo	-1.15469	1.09526	-0.038116	Uqcrq	Uqcrq	ubiquinol-cytochrome c reductase, complex III subunit VII	Uqcrq	22272	22272	11|11 B1.3	protein-coding	24.383	24.3639	24.402	-0.5σ	24.1793	24.4428	24.4211	24.5333	24.4337	24.3142	24.3752	24.3356	24.5246	24.27
1619	1219	Q60770	Stxbp3	5	5	14.581	14.4955	0.618666	1.06109	1.06109	KO_1Way up vs WT_12mo	-1.22732	1.38186	0.0855513	Stxbp3	Stxbp3	syntaxin binding protein 3	Stxbp3	20912	20912	3|3 F3	protein-coding	14.5382	14.4955	14.581	+0.5σ	14.1235	14.2941	14.8458	14.4423	14.7717	14.5701	14.4426	14.376	14.6145	14.9019
1026	1220	Q3U1J4	Ddb1	5	5	19.6917	20.1785	0.619661	0.713603	-1.40134	KO_1Way down vs WT_12mo	-6.32652	3.22165	-0.486807	Ddb1	Ddb1	damage specific DNA binding protein 1	Ddb1	13194	13194	19 A|19 6.66 cM	protein-coding	19.9351	19.6917	20.1785	-2σ	18.0486	21.0519	21.4288	21.5095	18.8538	21.1677	18.5304	18.8421	18.7335	21.1849
1338	1221	D3Z316	Mtres1	5	5	19.2301	19.4638	0.620268	0.850417	-1.17589	KO_1Way down vs WT_12mo	-2.42807	1.756	-0.233757	Mtres1	Mtres1	mitochondrial transcription rescue factor 1	Mtres1	67851	67851	10|10 B2	protein-coding	19.3469	19.2301	19.4638	-1σ	19.3399	19.12	18.8872	19.335	20.6371	18.475	19.0302	20.4604	19.3097	18.8751
1318	1222	P61082	Ube2m	5	5	18.8615	18.7521	0.62065	1.07875	1.07875	KO_1Way up vs WT_12mo	-1.30186	1.51499	0.109364	Ube2m	Ube2m	ubiquitin-conjugating enzyme E2M	Ube2m	22192	22192	7 A1|7 7.73 cM	protein-coding	18.8068	18.7521	18.8615	+0.5σ	18.8205	18.6803	18.5766	18.9199	18.7634	19.0158	18.0633	19.0478	19.2199	18.9606
950	1223	Q61584	Fxr1	5	5	20.0002	19.9514	0.621083	1.03446	1.03446	KO_1Way up vs WT_12mo	-1.12533	1.20421	0.0488719	Fxr1	Fxr1	fragile X mental retardation gene 1, autosomal homolog	Fxr1	14359	14359	3|3 A3	protein-coding	19.9758	19.9514	20.0002	+0.5σ	19.8039	20.1134	20.0836	19.8286	19.9274	20.0471	19.7959	19.9499	19.9786	20.2296
803	1224	A2BFF9	Dync1i2	5	5	19.4039	19.4474	0.62143	0.97033	-1.03058	KO_1Way down vs WT_12mo	-1.17982	1.11084	-0.0434531	Dync1i2	Dync1i2	dynein cytoplasmic 1 intermediate chain 2	Dync1i2	13427	13427	2 C2|2 42.38 cM	protein-coding	19.4257	19.4039	19.4474	-0.5σ	19.7207	19.4098	19.2597	19.4881	19.3586	19.3149	19.4487	19.5036	19.3972	19.3553
1864	1225	D3YYS6	Mgll	5	5	16.4876	16.5456	0.621712	0.960613	-1.041	KO_1Way down vs WT_12mo	-1.24702	1.15073	-0.0579722	Mgll	Mgll	monoglyceride lipase	Mgll	23945	23945	6|6 D1	protein-coding	16.5166	16.4876	16.5456	-0.5σ	16.6973	16.434	16.3512	16.6576	16.5879	16.4658	16.2454	16.7835	16.5728	16.3707
1299	1226	Q6PA06	Atl2	5	5	16.5337	16.4131	0.621968	1.08719	1.08719	KO_1Way up vs WT_12mo	-1.33958	1.58336	0.120605	Atl2	Atl2	atlastin GTPase 2	Atl2	56298	56298	17|17 E3	protein-coding	16.4734	16.4131	16.5337	+0.5σ	16.273	16.7744	16.8242	15.7989	16.3948	16.1435	16.5572	16.4817	16.4544	17.0315
256	1227	P11276	Fn1	5	5	22.9299	22.9775	0.622103	0.967534	-1.03355	KO_1Way down vs WT_12mo	-1.199	1.12241	-0.047615	Fn1	Fn1	fibronectin 1	Fn1	14268	14268	1 C3|1 36.05 cM	protein-coding	22.9537	22.9299	22.9775	-0.5σ	22.8035	22.8238	23.1861	23.1146	22.9595	23.013	22.749	23.0528	22.9399	22.8947
287	1228	Q924M7	Mpi	5	5	23.3554	23.3147	0.622281	1.0286	1.0286	KO_1Way up vs WT_12mo	-1.10378	1.16783	0.0406866	Mpi	Mpi	mannose phosphate isomerase	Mpi	110119	110119	9 B|9 31.05 cM	protein-coding	23.335	23.3147	23.3554	+0.5σ	23.2986	23.4524	23.2664	23.1933	23.3629	23.1839	23.4399	23.2067	23.4961	23.4506
565	1229	Q62000	Ogn	5	5	22.1254	22.0489	0.622557	1.05447	1.05447	KO_1Way up vs WT_12mo	-1.2043	1.33907	0.0765197	Ogn	Ogn	osteoglycin	Ogn	18295	18295	13|13 A5	protein-coding	22.0872	22.0489	22.1254	+0.5σ	21.5397	22.0876	22.2772	22.194	22.146	21.9012	22.2393	22.0827	22.3177	22.0862
557	1230	A0A1Y7VL34	Dtna	5	5	20.3554	20.4128	0.622862	0.960998	-1.04058	KO_1Way down vs WT_12mo	-1.24503	1.14981	-0.0573946	Dtna	Dtna	dystrobrevin alpha	Dtna	13527	13527	18 A2|18 12.08 cM	protein-coding	20.3841	20.3554	20.4128	-0.5σ	20.426	20.6771	20.4347	20.0673	20.459	20.4163	20.4323	20.2218	20.2261	20.4807
561	1231	Q6ZQ73	Cand2	5	5	21.3959	21.3524	0.623136	1.03065	1.03065	KO_1Way up vs WT_12mo	-1.11189	1.1811	0.0435609	Cand2	Cand2	cullin-associated and neddylation-dissociated 2 (putative)	Cand2	67088	67088	6|6 E3	protein-coding	21.3742	21.3524	21.3959	+0.5σ	21.2158	21.4112	21.5051	21.2293	21.4004	21.576	21.4267	21.179	21.3672	21.4308
1974	1232	Q91W90	Txndc5	5	5	19.0464	19.1249	0.623316	0.947035	-1.05593	KO_1Way down vs WT_12mo	-1.35002	1.2108	-0.0785105	Txndc5	Txndc5	thioredoxin domain containing 5	Txndc5	105245	105245	13|13 A3.3	protein-coding	19.0857	19.0464	19.1249	-0.5σ	19.0745	18.9157	19.4098	19.068	19.1564	18.5841	19.0563	19.0802	19.3941	19.1172
220	1233	Q9DBJ1	Pgam1	5	5	24.9526	24.8873	0.623367	1.04629	1.04629	KO_1Way up vs WT_12mo	-1.17244	1.2835	0.0652852	Pgam1	Pgam1	phosphoglycerate mutase 1	Pgam1	18648	18648	19|19 C3	protein-coding	24.92	24.8873	24.9526	+0.5σ	24.6195	25.1391	25.0613	24.5863	25.0302	24.9122	24.9242	24.9535	25.1376	24.8355
714	1234	P61164	Actr1a	5	5	22.2708	22.2071	0.62352	1.04516	1.04516	KO_1Way up vs WT_12mo	-1.16807	1.27594	0.0637172	Actr1a	Actr1a	ARP1 actin-related protein 1A, centractin alpha	Actr1a	54130	54130	19|19 C3	protein-coding	22.2389	22.2071	22.2708	+0.5σ	22.0587	21.9546	22.1111	22.396	22.5151	22.1149	22.2916	22.4425	22.1275	22.3775
1571	1235	Q64152	Btf3	5	5	16.4697	16.5774	0.624489	0.928072	-1.0775	KO_1Way down vs WT_12mo	-1.51108	1.30152	-0.107691	Btf3	Btf3	basic transcription factor 3	Btf3	218490	218490	13|13 D1	protein-coding	16.5236	16.4697	16.5774	-0.5σ	16.7231	16.273	17.0306	16.5236	16.3365	16.5241	16.7965	15.8885	16.4154	16.7239
144	1236	O08749	Dld	5	5	26.4642	26.487	0.625047	0.984268	-1.01598	KO_1Way down vs WT_12mo	-1.09179	1.05771	-0.0228775	Dld	Dld	dihydrolipoamide dehydrogenase	Dld	13382	13382	12 A2|12 13.43 cM	protein-coding	26.4756	26.4642	26.487	-0.5σ	26.5366	26.572	26.4177	26.4545	26.4545	26.5351	26.4834	26.5351	26.3676	26.3995
512	1237	P70349	Hint1	5	5	22.7505	22.8166	0.625253	0.955218	-1.04688	KO_1Way down vs WT_12mo	-1.28898	1.17612	-0.0660987	Hint1	Hint1	histidine triad nucleotide binding protein 1	Hint1	15254	15254	11|11 B1.3	protein-coding	22.7836	22.7505	22.8166	-0.5σ	22.5849	22.7504	23.1398	22.9206	22.6871	22.4384	22.8371	22.9399	22.8284	22.7086
1845	1238	O70494	Sp3	5	5	21.5551	21.613	0.625619	0.960693	-1.04092	KO_1Way down vs WT_12mo	-1.24904	1.15278	-0.0578525	Sp3	Sp3	trans-acting transcription factor 3	Sp3	20687	20687	2|2 C3	protein-coding	21.5841	21.5551	21.613	-0.5σ	21.5852	21.6287	21.5134	21.9896	21.3481	21.4462	21.6002	21.4577	21.6177	21.6541
668	1239	Q05816	Fabp5	5	5	24.7863	24.8193	0.625804	0.977343	-1.02318	KO_1Way down vs WT_12mo	-1.13558	1.08471	-0.0330626	Fabp5	Fabp5	fatty acid binding protein 5, epidermal	Fabp5	16592	16592	3|3 A1	protein-coding	24.8028	24.7863	24.8193	-0.5σ	24.7082	24.7362	24.8845	24.9133	24.8544	24.7681	24.7681	24.6517	24.9668	24.7767
138	1240	P34914	Ephx2	5	5	24.1032	24.1321	0.626555	0.980175	-1.02023	KO_1Way down vs WT_12mo	-1.11773	1.07385	-0.0288895	Ephx2	Ephx2	epoxide hydrolase 2, cytoplasmic	Ephx2	13850	13850	14 D1|14 34.36 cM	protein-coding	24.1177	24.1032	24.1321	-0.5σ	24.2282	24.0491	24.1014	24.0718	24.21	24.1679	23.9714	24.0804	24.2266	24.0698
1699	1241	P15105	Glul	5	5	19.192	19.2593	0.628041	0.954423	-1.04775	KO_1Way down vs WT_12mo	-1.2972	1.18165	-0.0673	Glul	Glul	glutamate-ammonia ligase (glutamine synthetase)	Glul	14645	14645	1|1 G3	protein-coding	19.2257	19.192	19.2593	-0.5σ	19.0505	19.253	19.5249	19.3399	19.128	19.4161	18.913	19.4547	19.0729	19.1032
1971	1242	Q99JX3	Gorasp2	5	5	19.1711	19.2096	0.628208	0.973671	-1.02704	KO_1Way down vs WT_12mo	-1.16055	1.10024	-0.0384935	Gorasp2	Gorasp2	golgi reassembly stacking protein 2	Gorasp2	70231	70231	2|2 C2	protein-coding	19.1903	19.1711	19.2096	-0.5σ	19.4274	19.0933	19.0834	19.18	19.2638	19.2993	19.0602	19.2354	19.1288	19.1317
1407	1243	H7BWY6	Rbp4	5	5	19.1628	18.9189	0.628589	1.18424	1.18424	KO_1Way up vs WT_12mo	-1.83365	2.57157	0.243963	Rbp4	Rbp4	retinol binding protein 4, plasma	Rbp4	19662	19662	19 C2|19 32.75 cM	protein-coding	19.0408	18.9189	19.1628	+1σ	19.128	19.4881	19.128	19.2109	17.6392	19.2075	19.556	19.4763	19.7959	17.7784
37	1244	Q03265	Atp5a1	5	5	30.4613	30.4959	0.628841	0.976253	-1.02432	KO_1Way down vs WT_12mo	-1.14376	1.09008	-0.034673	Atp5a1	Atp5a1	ATP synthase, H+ transporting, mitochondrial F1 complex, alpha subunit 1	Atp5a1	11946	11946	18 E3|18 52.38 cM	protein-coding	30.4786	30.4613	30.4959	-0.5σ	30.3399	30.5096	30.5096	30.6111	30.5096	30.6107	30.3386	30.5092	30.5092	30.3386
324	1245	Q9CQA3	Sdhb	5	5	26.0598	26.0329	0.629321	1.01882	1.01882	KO_1Way up vs WT_12mo	-1.06935	1.10999	0.0269053	Sdhb	Sdhb	succinate dehydrogenase complex, subunit B, iron sulfur (Ip)	Sdhb	67680	67680	4|4 D3	protein-coding	26.0464	26.0329	26.0598	+0.5σ	25.9306	26.1188	26.0867	26.0727	25.9557	26.012	26.0368	26.2115	26.0267	26.012
257	1246	P51881	Slc25a5	5	5	25.4757	25.4497	0.629531	1.01817	1.01817	KO_1Way up vs WT_12mo	-1.06693	1.10604	0.0259738	Slc25a5	Slc25a5	solute carrier family 25 (mitochondrial carrier, adenine nucleotide translocator), member 5	Slc25a5	11740	11740	X A3.3|X 21.2 cM	protein-coding	25.4627	25.4497	25.4757	+0.5σ	25.4042	25.5989	25.4925	25.3234	25.4298	25.4026	25.5489	25.4608	25.491	25.4752
1383	1247	Q9JJU8	Sh3bgrl	5	5	18.6397	18.7202	0.630056	0.945706	-1.05741	KO_1Way down vs WT_12mo	-1.36741	1.22295	-0.0805362	Sh3bgrl	Sh3bgrl	SH3-binding domain glutamic acid-rich protein like	Sh3bgrl	56726	56726	X|X D	protein-coding	18.68	18.6397	18.7202	-0.5σ	18.5169	18.7009	18.637	18.9257	18.8205	18.1882	18.4398	18.9779	18.728	18.8644
[truncated: 792 more rows]
