# Supplementary material for: Alterations in cytoskeletal and Ca2+ cycling regulators in atria lacking the obscurin Ig58/59 module
Source: Front Cardiovasc Med. 2023 Apr 13;10:1085840. doi: 10.3389/fcvm.2023.1085840 (PMC10251194; doi:10.3389/fcvm.2023.1085840)
Supplement: Supplementary file 12 [file Data_Sheet_4.xlsx]

## Sheet: 12-Mo_Raw_All-PhosphoPeptides-U
Column #	Sort	Column ID original	Accession	Gene Symbol	Obs 12Mo (KO)	Obs 12Mo (WT)	Mean 12Mo (KO)	Mean 12Mo (WT)	Avg 12Mo (KO + WT)	12Mo-KO_1Way vs. WT (p-val)	12Mo-KO_1Way vs. WT (ratio)	12Mo-KO_1Way vs. WT Lin(FC)	12Mo-KO_1Way vs. WT (Description)	12Mo-KO_1Way vs. WT 95% lower limit	12Mo-KO_1Way vs. WT 95% upper limit	12Mo-KO_1Way vs. WT Log2(FC)	Accession	Sequence	Mod Prob	Mod AllPoss	protein accession	Local FDR	Global FDR	Gene Symbol	Gene Name (NCBI)	Entrez GeneID	Symbol from nomenclature authority	CytoLoc (NCBI)	type_of_gene (NCBI)	SD Binned 12Mo-KO_1Way vs. WT Log2(FC)	Abundances (Normalized): F1: Sample, WT	Abundances (Normalized): F2: Sample, WT	Abundances (Normalized): F3: Sample, WT	Abundances (Normalized): F4: Sample, WT	Abundances (Normalized): F5: Sample, WT	Abundances (Normalized): F6: Sample, KO	Abundances (Normalized): F7: Sample, KO	Abundances (Normalized): F8: Sample, KO	Abundances (Normalized): F9: Sample, KO	Abundances (Normalized): F10: Sample, KO
2877	1	E9Q1U2_GVSSPVAGPAQPPPWPQPAPWSQPAFYDSSEQIASR_1xDeamidated [Q]; 1xPhospho [S3(78.8)]_1xDeamidated [Q11; Q17; Q23; Q32]; 1xPhospho [S3(78.8); S4(21.2); S22(0); Y27(0); S29(0); S30(0); S35(0)]	E9Q1U2	Synpo2	5	5	20.5019	14.6211	17.5615	1.72046e-09	58.9272	58.9272	12Mo-KO_1Way up vs WT	43.0086	80.7377	5.88086	E9Q1U2	GVSSPVAGPAQPPPWPQPAPWSQPAFYDSSEQIASR	1xDeamidated [Q]; 1xPhospho [S3(78.8)]	1xDeamidated [Q11; Q17; Q23; Q32]; 1xPhospho [S3(78.8); S4(21.2); S22(0); Y27(0); S29(0); S30(0); S35(0)]	NP_536699	0.00112838	0	Synpo2	synaptopodin 2	118449	Synpo2	3|3 G1	protein-coding	> +6σ	14.3872	15.0236	14.7286	14.048	14.9179	20.4333	20.6544	20.5257	20.2278	20.6684
1897	2	Q9ET54_SPVDESGDEVQDPDVPVENATAPFFEMK_2xDeamidated [Q11; N19]; 1xPhospho [S6(97.7)]_2xDeamidated [Q11; N19]; 1xPhospho [S1(2.3); S6(97.7); T21(0)]	Q9ET54	Palld	5	5	19.9397	16.2499	18.0948	5.08738e-08	12.9045	12.9045	12Mo-KO_1Way up vs WT	9.52792	17.4776	3.6898	Q9ET54	SPVDESGDEVQDPDVPVENATAPFFEMK	2xDeamidated [Q11; N19]; 1xPhospho [S6(97.7)]	2xDeamidated [Q11; N19]; 1xPhospho [S1(2.3); S6(97.7); T21(0)]	NP_001074859	4.8861e-05	0	Palld	palladin, cytoskeletal associated protein	72333	Palld	8|8 B3.1	protein-coding	> +6σ	16.8376	16.018	15.932	16.3175	16.1447	20.2039	19.7738	19.6442	20.0288	20.048
562	3	Q63918_SLEETLHNVDLSSDDELPRDEEALEDSAEEK_1xDeamidated [N8]; 2xPhospho [S27(100); S/T]_1xDeamidated [N8]; 2xPhospho [S1(0.2); T5(1.7); S12(49); S13(49); S27(100)]	Q63918	Cavin2	5	5	19.2059	17.2858	18.2459	3.74938e-07	3.78456	3.78456	12Mo-KO_1Way up vs WT	3.08651	4.64047	1.92012	Q63918	SLEETLHNVDLSSDDELPRDEEALEDSAEEK	1xDeamidated [N8]; 2xPhospho [S27(100); S/T]	1xDeamidated [N8]; 2xPhospho [S1(0.2); T5(1.7); S12(49); S13(49); S27(100)]	NP_620080	0.000337067	0	Cavin2	caveolae associated 2	20324	Cavin2	1|1 C1.1	protein-coding	+6σ	17.4521	17.2022	17.4231	17.3851	16.9664	19.2723	19.4848	18.9416	19.1168	19.214
2250	4	Q5U3K5_FPVREDLSDVTDEDTGPAQPPPPSK_2xPhospho [S8(100); T11(100)]_2xPhospho [S8(100); T11(100); T15(0); S24(0)]	Q5U3K5	Rabl6	5	5	14.4366	16.3423	15.3895	7.15083e-07	0.266895	-3.74679	12Mo-KO_1Way down vs WT	-4.66865	-3.00696	-1.90566	Q5U3K5	FPVREDLSDVTDEDTGPAQPPPPSK	2xPhospho [S8(100); T11(100)]	2xPhospho [S8(100); T11(100); T15(0); S24(0)]	NP_001019787	0.0941269	0.00244569	Rabl6	RAB, member RAS oncogene family-like 6	227624	Rabl6	2|2 A3	protein-coding	-6σ	16.0653	16.5365	16.2565	16.4307	16.4225	14.1693	14.5404	14.2286	14.4673	14.7777
3203	5	P24529_QAEAVTSPR_1xPhospho [T6(96.9)]_1xPhospho [T6(96.9); S7(3.1)]	P24529	Th	5	5	13.6807	16.3998	15.0403	1.19789e-06	0.151865	-6.5848	12Mo-KO_1Way down vs WT	-9.21109	-4.70733	-2.71914	P24529	QAEAVTSPR	1xPhospho [T6(96.9)]	1xPhospho [T6(96.9); S7(3.1)]	NP_033403	0.200491	0.00788275	Th	tyrosine hydroxylase	21823	Th	7 F5|7 88.06 cM	protein-coding	-6σ	16.2896	16.3568	16.3595	16.6054	16.3878	13.002	13.4882	13.7538	14.1142	14.0452
2686	6	Q60598_KQTPPASPSPQPIEDRPPSSPIYEDAAPFK_1xDeamidated [Q]; 3xPhospho [T3(100); S7(100); S9(100)]_1xDeamidated [Q2; Q11]; 3xPhospho [T3(100); S7(100); S9(100); S19(0); S20(0); Y23(0)]	Q60598	Cttn	5	5	15.8798	18.4492	17.1645	4.37691e-06	0.168477	-5.93553	12Mo-KO_1Way down vs WT	-8.64487	-4.07531	-2.56938	Q60598	KQTPPASPSPQPIEDRPPSSPIYEDAAPFK	1xDeamidated [Q]; 3xPhospho [T3(100); S7(100); S9(100)]	1xDeamidated [Q2; Q11]; 3xPhospho [T3(100); S7(100); S9(100); S19(0); S20(0); Y23(0)]	NP_031829	0.0021042	0	Cttn	cortactin	13043	Cttn	7|7 F5	protein-coding	-6σ	18.578	18.7132	17.8042	18.537	18.6134	15.272	16.2325	16.143	15.818	15.9333
2260	7	A0A1W2P712_HFSQSEDTGNEVFGALHEEQPLPR_1xDeamidated [Q/N]; 1xPhospho [S3(87.4)]_1xDeamidated [Q4; N10; Q20]; 1xPhospho [S3(87.4); S5(12.6); T8(0)]	A0A1W2P712	---	5	5	17.3042	15.935	16.6196	4.84567e-06	2.58335	2.58335	12Mo-KO_1Way up vs WT	2.10852	3.16512	1.36925	A0A1W2P712	HFSQSEDTGNEVFGALHEEQPLPR	1xDeamidated [Q/N]; 1xPhospho [S3(87.4)]	1xDeamidated [Q4; N10; Q20]; 1xPhospho [S3(87.4); S5(12.6); T8(0)]	---	0.00144504	0	Ralgapa1	Ral GTPase activating protein, alpha subunit 1	56784	Ralgapa1	12|12 C1	protein-coding	+3σ	15.7589	16.2055	15.5981	16.1111	16.0015	17.1746	17.4175	17.4728	17.2365	17.2198
542	8	Q63918_RGNNSAVGSNADLTIEEDEEEEPVALQQAQQVR_3xDeamidated [N/Q]; 1xPhospho [S9(82.1)]_3xDeamidated [N3; N4; N10; Q27; Q28; Q30; Q31]; 1xPhospho [S5(17.9); S9(82.1); T14(0.1)]	Q63918	Cavin2	5	5	20.6789	16.9163	18.7976	1.10811e-05	13.5724	13.5724	12Mo-KO_1Way up vs WT	7.27694	25.3144	3.76261	Q63918	RGNNSAVGSNADLTIEEDEEEEPVALQQAQQVR	3xDeamidated [N/Q]; 1xPhospho [S9(82.1)]	3xDeamidated [N3; N4; N10; Q27; Q28; Q30; Q31]; 1xPhospho [S5(17.9); S9(82.1); T14(0.1)]	NP_620080	8.60605e-05	0	Cavin2	caveolae associated 2	20324	Cavin2	1|1 C1.1	protein-coding	> +6σ	16.9075	16.7579	16.4464	17.5682	16.9014	21.4364	21.3213	19.6195	20.8276	20.1896
709	9	F8WJE0_TPPSTPPATANLSADDDFQNTDLR_1xDeamidated [N/Q]; 1xPhospho [T1(99.7)]_1xDeamidated [N11; Q19; N20]; 1xPhospho [T1(99.7); S4(0.3); T5(0); T9(0); S13(0); T21(0)]	F8WJE0	Samhd1	5	5	17.8106	15.6499	16.7303	1.5288e-05	4.47116	4.47116	12Mo-KO_1Way up vs WT	3.07655	6.49796	2.16065	F8WJE0	TPPSTPPATANLSADDDFQNTDLR	1xDeamidated [N/Q]; 1xPhospho [T1(99.7)]	1xDeamidated [N11; Q19; N20]; 1xPhospho [T1(99.7); S4(0.3); T5(0); T9(0); S13(0); T21(0)]	NP_061339	0.002826	0	Samhd1	SAM domain and HD domain, 1	56045	Samhd1	2|2 H1	protein-coding	+6σ	15.932	15.2604	15.8416	16.1352	15.0805	17.9676	17.5291	17.8105	18.1509	17.5948
1132	10	Q8VDM6_APQQQPPPQQPPPPQPPPQQPPPPPSYSPAR_2xDeamidated [Q]; 1xPhospho [S28(85.4)]_2xDeamidated [Q5; Q9; Q10; Q15; Q19; Q20]; 1xPhospho [S26(14.6); Y27(0); S28(85.4)]	Q8VDM6	Hnrnpul1	5	5	16.5523	17.7334	17.1428	2.17198e-05	0.441008	-2.26753	12Mo-KO_1Way down vs WT	-2.80962	-1.83004	-1.18112	Q8VDM6	APQQQPPPQQPPPPQPPPQQPPPPPSYSPAR	2xDeamidated [Q]; 1xPhospho [S28(85.4)]	2xDeamidated [Q5; Q9; Q10; Q15; Q19; Q20]; 1xPhospho [S26(14.6); Y27(0); S28(85.4)]	NP_659171	0.000718115	0	Hnrnpul1	heterogeneous nuclear ribonucleoprotein U-like 1	232989	Hnrnpul1	7|7 A3	protein-coding	-3σ	17.9441	17.734	17.579	17.5155	17.8943	16.3985	16.8661	16.3618	16.3955	16.7395
951	11	Q6P5B5_DPDSNPYSLLDTSEPEPPVDSEPGEPPPASAR_1xDeamidated [N5]; 1xPhospho [S21(100)]_1xDeamidated [N5]; 1xPhospho [S4(0); Y7(0); S8(0); T12(0); S13(0); S21(100); S30(0)]	Q6P5B5	Fxr2	5	5	16.8609	18.6911	17.776	2.82855e-05	0.281229	-3.55582	12Mo-KO_1Way down vs WT	-5.01768	-2.51986	-1.83018	Q6P5B5	DPDSNPYSLLDTSEPEPPVDSEPGEPPPASAR	1xDeamidated [N5]; 1xPhospho [S21(100)]	1xDeamidated [N5]; 1xPhospho [S4(0); Y7(0); S8(0); T12(0); S13(0); S21(100); S30(0)]	NP_035944	0.000906615	0	Fxr2	fragile X mental retardation, autosomal homolog 2	23879	Fxr2	11 B3|11 42.86 cM	protein-coding	-6σ	18.9788	19.2204	18.1912	18.6548	18.4102	16.757	16.89	17.2516	16.6	16.806
2467	12	Q8BTI8_SEQPLSQVLPSLSPEHK_1xDeamidated [Q7]; 1xPhospho [S13(99.9)]_1xDeamidated [Q3; Q7]; 1xPhospho [S1(0); S6(0); S11(0.1); S13(99.9)]	Q8BTI8	Srrm2	5	5	16.215	17.6103	16.9126	3.28058e-05	0.380169	-2.63041	12Mo-KO_1Way down vs WT	-3.43872	-2.0121	-1.39529	Q8BTI8	SEQPLSQVLPSLSPEHK	1xDeamidated [Q7]; 1xPhospho [S13(99.9)]	1xDeamidated [Q3; Q7]; 1xPhospho [S1(0); S6(0); S11(0.1); S13(99.9)]	NP_780438	0.00517061	0	Srrm2	serine/arginine repetitive matrix 2	75956	Srrm2	17|17 A3.3	protein-coding	-3σ	17.7414	17.5299	17.8061	17.734	17.24	15.9399	16.4543	15.9209	16.5721	16.1879
687	13	Q8K3H0_TSSSGSLGSESTNLAALSLDSLVAPDTPIQFDIISPVCEDQPGQAK_1xCarbamidomethyl [C38]; 1xDeamidated [Q]; 1xPhospho [S/T]_1xCarbamidomethyl [C38]; 1xDeamidated [Q30; Q41; Q44]; 1xPhospho [T1(7); S2(7); S3(7); S4(69.5); S6(2.4); S9(2.4); S11(2.4); T12(2.4); S18(0); ｪ'ﾖ$b*	Q8K3H0	Appl1	5	5	15.7725	16.4612	16.1168	3.50949e-05	0.620393	-1.61188	12Mo-KO_1Way down vs WT	-1.84211	-1.41043	-0.688745	Q8K3H0	TSSSGSLGSESTNLAALSLDSLVAPDTPIQFDIISPVCEDQPGQAK	1xCarbamidomethyl [C38]; 1xDeamidated [Q]; 1xPhospho [S/T]	1xCarbamidomethyl [C38]; 1xDeamidated [Q30; Q41; Q44]; 1xPhospho [T1(7); S2(7); S3(7); S4(69.5); S6(2.4); S9(2.4); S11(2.4); T12(2.4); S18(0); ｪ'ﾖ$b*	NP_660256	0.171481	0.00608583	Appl1	adaptor protein, phosphotyrosine interaction, PH domain and leucine zipper containing 1	72993	Appl1	14|14 A3	protein-coding	-2σ	16.3474	16.4271	16.4486	16.5055	16.5775	15.5921	15.8267	15.6049	15.9584	15.8803
1069	14	Q3U2G2_MQVDQEEPHTEEQQQQPQTPAENKAESEEMETSQAGSK_1xPhospho [T19(80.7)]_1xPhospho [T10(0); T19(80.7); S27(19.3); T32(0); S33(0); S37(0)]	Q3U2G2	Hspa4	5	5	16.4511	18.4053	17.4282	6.20483e-05	0.258069	-3.87494	12Mo-KO_1Way down vs WT	-5.83924	-2.57142	-1.95417	Q3U2G2	MQVDQEEPHTEEQQQQPQTPAENKAESEEMETSQAGSK	1xPhospho [T19(80.7)]	1xPhospho [T10(0); T19(80.7); S27(19.3); T32(0); S33(0); S37(0)]	NP_032326	0.0122895	0	Hspa4	heat shock protein 4	15525	Hspa4	11 B1.3|11 31.91 cM	protein-coding	-6σ	18.872	17.9784	18.4555	18.5735	18.1469	17.2021	16.5412	16.1516	16.1086	16.2521
927	15	Q61554_GGPEPPASSEMDDNSLSPEACYECK_2xCarbamidomethyl [C21; C24]; 1xDeamidated [N14]; 1xPhospho [S9(87.4)]_2xCarbamidomethyl [C21; C24]; 1xDeamidated [N14]; 1xPhospho [S8(12.6); S9(87.4); S15(0); S17(0); Y22(0)]	Q61554	Fbn1	5	5	21.7908	20.0253	20.908	6.43948e-05	3.40005	3.40005	12Mo-KO_1Way up vs WT	2.34284	4.93433	1.76556	Q61554	GGPEPPASSEMDDNSLSPEACYECK	2xCarbamidomethyl [C21; C24]; 1xDeamidated [N14]; 1xPhospho [S9(87.4)]	2xCarbamidomethyl [C21; C24]; 1xDeamidated [N14]; 1xPhospho [S8(12.6); S9(87.4); S15(0); S17(0); Y22(0)]	NP_032019	6.68823e-05	0	Fbn1	fibrillin 1	14118	Fbn1	2 F1|2 61.38 cM	protein-coding	+6σ	20.5852	19.239	19.9462	20.2986	20.0573	21.8133	21.9419	21.8133	21.5725	21.8133
2263	16	Q61193_SASCGSPLSGNTGEGTSR_1xCarbamidomethyl [C4]; 1xDeamidated [N11]; 1xPhospho [S1(77)]_1xCarbamidomethyl [C4]; 1xDeamidated [N11]; 1xPhospho [S1(77); S3(11.5); S6(11.5); S9(0); T12(0); T16(0); S17(0)]	Q61193	Rgl2	5	5	19.0701	20.8053	19.9377	7.4432e-05	0.300371	-3.32921	12Mo-KO_1Way down vs WT	-4.83701	-2.29142	-1.73518	Q61193	SASCGSPLSGNTGEGTSR	1xCarbamidomethyl [C4]; 1xDeamidated [N11]; 1xPhospho [S1(77)]	1xCarbamidomethyl [C4]; 1xDeamidated [N11]; 1xPhospho [S1(77); S3(11.5); S6(11.5); S9(0); T12(0); T16(0); S17(0)]	NP_033085	0.00133914	0	Rgl2	ral guanine nucleotide dissociation stimulator-like 2	19732	Rgl2	17|17 B1	protein-coding	-6σ	21.1788	20.7703	20.0811	21.1173	20.879	19.1694	18.9156	19.23	18.6574	19.3782
2887	17	Q70IV5_ELYSPSGERDDAGQVSPSSDQR_1xPhospho [S16(100)]_1xPhospho [Y3(0); S4(0); S6(0); S16(100); S18(0); S19(0)]	Q70IV5	Synm	5	5	18.2745	16.8068	17.5406	7.53482e-05	2.7657	2.7657	12Mo-KO_1Way up vs WT	2.01533	3.79546	1.46765	Q70IV5	ELYSPSGERDDAGQVSPSSDQR	1xPhospho [S16(100)]	1xPhospho [Y3(0); S4(0); S6(0); S16(100); S18(0); S19(0)]	NP_899135	0.0630047	0.00104129	Synm	synemin, intermediate filament protein	233335	Synm	7|7 C	protein-coding	+3σ	16.7665	16.4085	16.8071	17.1653	16.8866	17.7057	18.6236	18.238	18.4719	18.3331
3102	18	A2ASS6_SPETVKSPKR_1xPhospho [S7(100)]_1xPhospho [S1(0); T4(0); S7(100)]	A2ASS6	---	5	5	15.0128	12.3797	13.6962	0.000104727	6.20322	6.20322	12Mo-KO_1Way up vs WT	3.42145	11.2467	2.63302	A2ASS6	SPETVKSPKR	1xPhospho [S7(100)]	1xPhospho [S1(0); T4(0); S7(100)]	---	0.203091	0.00803635	Ttn	titin	22138	Ttn	2 C3|2 45.13 cM	protein-coding	+6σ	12.477	12.2426	12.477	12.7786	11.9236	15.6101	13.6789	15.0859	15.3943	15.2946
228	19	S4R1S2_SFADENNVFHDPVDGWQNETPSGSLESPAQAR_2xDeamidated [N/Q]; 1xPhospho [S27(100)]_2xDeamidated [N6; N7; Q17; N18; Q30]; 1xPhospho [S1(0); T20(0); S22(0); S24(0); S27(100)]	S4R1S2	---	5	5	18.9891	19.7088	19.3489	0.000110561	0.607233	-1.64682	12Mo-KO_1Way down vs WT	-1.9401	-1.39787	-0.719679	S4R1S2	SFADENNVFHDPVDGWQNETPSGSLESPAQAR	2xDeamidated [N/Q]; 1xPhospho [S27(100)]	2xDeamidated [N6; N7; Q17; N18; Q30]; 1xPhospho [S1(0); T20(0); S22(0); S24(0); S27(100)]	---	0.0127662	0	Ank3	ankyrin 3, epithelial	11735	Ank3	10 B5.3|10 36.1 cM	protein-coding	-2σ	19.6629	19.6744	19.5669	20.0521	19.5878	18.9067	19.0994	19.0874	19.0204	18.8317
3296	20	Q64727_SLLDASEEAIKK_1xPhospho [S1(100)]_1xPhospho [S1(100); S6(0)]	Q64727	Vcl	5	5	18.1186	14.6634	16.391	0.000125058	10.9678	10.9678	12Mo-KO_1Way up vs WT	4.92376	24.4312	3.45521	Q64727	SLLDASEEAIKK	1xPhospho [S1(100)]	1xPhospho [S1(100); S6(0)]	NP_033528	0.00167465	0	Vcl	vinculin	22330	Vcl	14 A3|14 11.53 cM	protein-coding	> +6σ	15.0139	14.2304	14.459	15.0236	14.5901	17.966	18.5974	16.3305	18.9369	18.7624
2192	21	Q8BXN7_FGGFVAWNSLGQPHVNGR_2xDeamidated [N16; N/Q]; 1xPhospho [S9(100)]_2xDeamidated [N8; Q12; N16]; 1xPhospho [S9(100)]	Q8BXN7	Ppm1k	5	5	15.8946	17.3931	16.6439	0.000138885	0.353935	-2.82538	12Mo-KO_1Way down vs WT	-4.01989	-1.98582	-1.49845	Q8BXN7	FGGFVAWNSLGQPHVNGR	2xDeamidated [N16; N/Q]; 1xPhospho [S9(100)]	2xDeamidated [N8; Q12; N16]; 1xPhospho [S9(100)]	NP_780732	0.00343458	0	Ppm1k	protein phosphatase 1K (PP2C domain containing)	243382	Ppm1k	6|6 B3	protein-coding	-3σ	17.716	17.2115	17.4323	17.1732	17.4323	15.7114	15.9472	16.0026	16.5128	15.2992
254	22	O54774_KGEDLDFWLSTTPPPAAAPIPAPSTEELAASTITSPK_1xPhospho [T/S]_1xPhospho [S10(5.8); T11(20.2); T12(73.7); S24(0.2); T25(0.1); S31(0); T32(0); T34(0); S35(0)]	O54774	Ap3d1	5	5	16.3075	14.3034	15.3055	0.000249698	4.01133	4.01133	12Mo-KO_1Way up vs WT	2.39977	6.70515	2.00408	O54774	KGEDLDFWLSTTPPPAAAPIPAPSTEELAASTITSPK	1xPhospho [T/S]	1xPhospho [S10(5.8); T11(20.2); T12(73.7); S24(0.2); T25(0.1); S31(0); T32(0); T34(0); S35(0)]	NP_031486	0.196221	0.00763933	Ap3d1	adaptor-related protein complex 3, delta 1 subunit	11776	Ap3d1	10 C1|10 39.72 cM	protein-coding	+6σ	14.8862	14.2049	14.2049	14.5077	13.7133	16.4769	16.7656	16.0297	16.8183	15.447
3079	23	A2ASS6_APTPSPVR_1xPhospho [S5(99.5)]_1xPhospho [T3(0.6); S5(99.5)]	A2ASS6	---	5	5	18.3592	18.943	18.6511	0.000282296	0.667203	-1.49879	12Mo-KO_1Way down vs WT	-1.74554	-1.28692	-0.583802	A2ASS6	APTPSPVR	1xPhospho [S5(99.5)]	1xPhospho [T3(0.6); S5(99.5)]	---	0.0307789	0.00049971	Ttn	titin	22138	Ttn	2 C3|2 45.13 cM	protein-coding	-2σ	18.9318	18.8008	19.0527	19.1209	18.8087	18.6059	18.2476	18.388	18.3552	18.1992
459	24	E9QLJ0_KRNSLESQDVLTNQEDGPSISESPVLNIENEK_1xDeamidated [N/Q]; 1xPhospho [S4(86.8)]_1xDeamidated [N3; Q8; N13; Q14; N27; N30]; 1xPhospho [S4(86.8); S7(13.2); T12(0); S19(0); S21(0); S23(0)]	E9QLJ0	Cmya5	5	5	20.0192	21.1364	20.5778	0.000326688	0.460989	-2.16925	12Mo-KO_1Way down vs WT	-2.92254	-1.61012	-1.1172	E9QLJ0	KRNSLESQDVLTNQEDGPSISESPVLNIENEK	1xDeamidated [N/Q]; 1xPhospho [S4(86.8)]	1xDeamidated [N3; Q8; N13; Q14; N27; N30]; 1xPhospho [S4(86.8); S7(13.2); T12(0); S19(0); S21(0); S23(0)]	NP_076310	1.80796e-05	0	Cmya5	cardiomyopathy associated 5	76469	Cmya5	13|13 C3	protein-coding	-3σ	21.458	21.1788	21.0364	21.3731	20.6355	20.3791	20.0174	20.1531	19.8215	19.7247
358	25	J3QNU6_GMKDDKDEEDDGTGSPHLNNR_1xDeamidated [N]; 1xPhospho [S15(100)]_1xDeamidated [N19; N20]; 1xPhospho [T13(0); S15(100)]	J3QNU6	---	5	5	16.9209	15.8587	16.3898	0.000488333	2.08801	2.08801	12Mo-KO_1Way up vs WT	1.54508	2.82172	1.06213	J3QNU6	GMKDDKDEEDDGTGSPHLNNR	1xDeamidated [N]; 1xPhospho [S15(100)]	1xDeamidated [N19; N20]; 1xPhospho [T13(0); S15(100)]	---	0.000130178	0	Arrb1	arrestin, beta 1	109689	Arrb1	7 E1|7 54.09 cM	protein-coding	+2σ	15.7734	15.9293	15.5705	15.9	16.1204	16.3041	17.1613	17.1356	16.8483	17.1549
1887	26	Q5QNQ6_TQSDDSGDDDEEPAAPADNSELHHTLK_1xPhospho [S3(92.6)]_1xPhospho [T1(3.7); S3(92.6); S6(3.7); S20(0); T25(0)]	Q5QNQ6	Osbp2	5	5	16.9798	15.4575	16.2187	0.000549822	2.87249	2.87249	12Mo-KO_1Way up vs WT	1.85088	4.45798	1.5223	Q5QNQ6	TQSDDSGDDDEEPAAPADNSELHHTLK	1xPhospho [S3(92.6)]	1xPhospho [T1(3.7); S3(92.6); S6(3.7); S20(0); T25(0)]	NP_690031	0.0101601	0	Osbp2	oxysterol binding protein 2	74309	Osbp2	11|11 A1	protein-coding	+3σ	15.3954	15.7186	15.756	15.1216	15.2959	16.9324	16.7922	16.1859	17.5814	17.407
2051	27	Q9QXS1_TQLASWSDPTEETGPVAGILDTETLEK_1xPhospho [S7(87)]_1xPhospho [T1(0.3); S5(12.6); S7(87); T10(0.1); T13(0.1); T22(0); T24(0)]	Q9QXS1	Plec	5	5	16.8202	15.3123	16.0663	0.000582722	2.84409	2.84409	12Mo-KO_1Way up vs WT	1.83299	4.41292	1.50797	Q9QXS1	TQLASWSDPTEETGPVAGILDTETLEK	1xPhospho [S7(87)]	1xPhospho [T1(0.3); S5(12.6); S7(87); T10(0.1); T13(0.1); T22(0); T24(0)]	NP_001157012	0.0411395	0.000734311	Plec	plectin	18810	Plec	15 D3|15 35.48 cM	protein-coding	+3σ	15.4632	15.241	15.5878	15.6245	14.6448	16.806	16.4602	17.5907	16.7981	16.4461
2116	28	A2A841_SLDGAAAAESTDR_1xPhospho [S1(100)]_1xPhospho [S1(100); S10(0); T11(0)]	A2A841	---	5	5	15.0753	16.0156	15.5455	0.000628211	0.52113	-1.91891	12Mo-KO_1Way down vs WT	-2.53166	-1.45446	-0.940284	A2A841	SLDGAAAAESTDR	1xPhospho [S1(100)]	1xPhospho [S1(100); S10(0); T11(0)]	---	0.0361821	0.00049971	Epb41	erythrocyte membrane protein band 4.1	269587	Epb41	4 D2.3|4 64.54 cM	protein-coding	-2σ	15.9675	16.2882	16.1013	15.8296	15.8915	15.3364	15.491	14.7147	14.7652	15.0693
3108	29	P70399_ASQEPFSPAEDVMETDLLEGLAANQDRPSK_1xDeamidated [Q/N]; 1xPhospho [S7(95.3)]_1xDeamidated [Q3; N24; Q25]; 1xPhospho [S2(3.9); S7(95.3); T15(0.8); S29(0)]	P70399	Trp53bp1	5	5	17.8166	16.8083	17.3124	0.000680357	2.01143	2.01143	12Mo-KO_1Way up vs WT	1.48885	2.71745	1.00822	P70399	ASQEPFSPAEDVMETDLLEGLAANQDRPSK	1xDeamidated [Q/N]; 1xPhospho [S7(95.3)]	1xDeamidated [Q3; N24; Q25]; 1xPhospho [S2(3.9); S7(95.3); T15(0.8); S29(0)]	NP_001277759	0.00135194	0	Trp53bp1	transformation related protein 53 binding protein 1	27223	Trp53bp1	2|2 E5	protein-coding	+2σ	16.805	17.0266	16.8744	16.2858	17.0498	18.0339	18.1757	17.7837	17.5507	17.5388
3341	30	Q4U4S6_ENEDSLPPPSPPPLPPSNASSEIEFPLPPPPPLMLLPGK_1xDeamidated [N]; 1xPhospho [S5(92.2)]_1xDeamidated [N2; N18]; 1xPhospho [S5(92.2); S10(7.6); S17(0.1); S20(0.1); S21(0.1)]	Q4U4S6	Xirp2	5	5	16.2811	17.808	17.0446	0.000689859	0.347028	-2.88162	12Mo-KO_1Way down vs WT	-4.54917	-1.82532	-1.52688	Q4U4S6	ENEDSLPPPSPPPLPPSNASSEIEFPLPPPPPLMLLPGK	1xDeamidated [N]; 1xPhospho [S5(92.2)]	1xDeamidated [N2; N18]; 1xPhospho [S5(92.2); S10(7.6); S17(0.1); S20(0.1); S21(0.1)]	NP_001019789	0.0598211	0.00104129	Xirp2	xin actin-binding repeat containing 2	241431	Xirp2	2|2 C1.3	protein-coding	-3σ	18.5714	17.77	18.1022	16.9062	17.6902	16.2808	16.5535	16.0816	16.1516	16.3381
3371	31	Q80Y81_AHTDEPHSPQSK_1xPhospho [S8(100)]_1xPhospho [T3(0); S8(100); S11(0)]	Q80Y81	Elac2	5	5	13.5985	14.3046	13.9515	0.000700289	0.612954	-1.63145	12Mo-KO_1Way down vs WT	-2.01602	-1.32023	-0.70615	Q80Y81	AHTDEPHSPQSK	1xPhospho [S8(100)]	1xPhospho [T3(0); S8(100); S11(0)]	NP_075968	0.102263	0.00244569	Elac2	elaC ribonuclease Z 2	68626	Elac2	11 B3|11 40.42 cM	protein-coding	-2σ	14.6787	13.9585	14.1463	14.4451	14.2945	13.6789	13.6059	13.4411	13.7119	13.5546
1618	32	E9PV66_SGPLSSSPPSQR_1xPhospho [S10(99.9)]_1xPhospho [S1(0); S5(0); S6(0); S7(0.1); S10(99.9)]	E9PV66	Myo18b	5	5	18.453	18.8701	18.6615	0.000707166	0.748903	-1.33529	12Mo-KO_1Way down vs WT	-1.51342	-1.17812	-0.417149	E9PV66	SGPLSSSPPSQR	1xPhospho [S10(99.9)]	1xPhospho [S1(0); S5(0); S6(0); S7(0.1); S10(99.9)]	NP_083177	0.00582356	0	Myo18b	myosin XVIIIb	74376	Myo18b	5|5 F	protein-coding	-1σ	19.0941	18.872	18.9351	18.7785	18.671	18.4389	18.3612	18.4351	18.5579	18.4719
1026	33	O70310_LPAPSLPLMMEGNGNGHEHCSDCENEEDNSHNR_2xCarbamidomethyl [C20; C23]; 2xDeamidated [N]; 1xPhospho [S21(100)]_2xCarbamidomethyl [C20; C23]; 2xDeamidated [N13; N15; N25; N29; N32]; 1xPhospho [S5(0); S21(100); S30(0)]	O70310	Nmt1	5	5	19.2263	20.2954	19.7609	0.000754928	0.476605	-2.09817	12Mo-KO_1Way down vs WT	-2.90175	-1.51713	-1.06913	O70310	LPAPSLPLMMEGNGNGHEHCSDCENEEDNSHNR	2xCarbamidomethyl [C20; C23]; 2xDeamidated [N]; 1xPhospho [S21(100)]	2xCarbamidomethyl [C20; C23]; 2xDeamidated [N13; N15; N25; N29; N32]; 1xPhospho [S5(0); S21(100); S30(0)]	NP_032733	0.000303575	0	Nmt1	N-myristoyltransferase 1	18107	Nmt1	11|11 E1	protein-coding	-2σ	20.1834	20.577	20.6566	19.8698	20.1904	19.1265	19.738	18.8606	19.1721	19.2344
2393	34	E9Q401_ISQTSQVSIDAAHGYSPR_1xPhospho [S5(96.2)]_1xPhospho [S2(0); T4(3.2); S5(96.2); S8(0.6); Y15(0); S16(0)]	E9Q401	Ryr2	5	5	17.0853	15.2697	16.1775	0.000781068	3.51989	3.51989	12Mo-KO_1Way up vs WT	2.02359	6.12262	1.81553	E9Q401	ISQTSQVSIDAAHGYSPR	1xPhospho [S5(96.2)]	1xPhospho [S2(0); T4(3.2); S5(96.2); S8(0.6); Y15(0); S16(0)]	NP_076357	0.148218	0.00427545	Ryr2	ryanodine receptor 2, cardiac	20191	Ryr2	13 A1|13 4.38 cM	protein-coding	+6σ	15.791	14.7903	15.1513	16.0745	14.5416	16.4286	17.5011	17.1923	16.9513	17.3532
330	35	O70318_SLDGAPIGVVDQSPPGEGSVPGPGVISYTTIQDGR_1xDeamidated [Q12]; 1xPhospho [S1(99.1)]_1xDeamidated [Q12]; 1xPhospho [S1(99.1); S13(0.8); S19(0.1); S27(0); Y28(0); T29(0); T30(0)]	O70318	Epb41l2	5	5	15.5824	16.2175	15.9	0.000844274	0.643897	-1.55304	12Mo-KO_1Way down vs WT	-1.88937	-1.27658	-0.635099	O70318	SLDGAPIGVVDQSPPGEGSVPGPGVISYTTIQDGR	1xDeamidated [Q12]; 1xPhospho [S1(99.1)]	1xDeamidated [Q12]; 1xPhospho [S1(99.1); S13(0.8); S19(0.1); S27(0); Y28(0); T29(0); T30(0)]	NP_001186194	0.193698	0.00763933	Epb41l2	erythrocyte membrane protein band 4.1 like 2	13822	Epb41l2	10 A4|10 12.26 cM	protein-coding	-2σ	16.2376	16.1781	15.9675	16.1781	16.5259	15.5443	15.8234	15.4383	15.3831	15.7227
3343	36	Q9Z1K8_YEVAAQHEADDGSALGDGASPVAEQVK_1xDeamidated [Q]; 1xPhospho [S13(100)]_1xDeamidated [Q6; Q25]; 1xPhospho [Y1(0); S13(100); S20(0)]	Q9Z1K8	Slc7a7	5	5	17.2525	18.3524	17.8025	0.000845954	0.466564	-2.14333	12Mo-KO_1Way down vs WT	-3.01002	-1.52619	-1.09985	Q9Z1K8	YEVAAQHEADDGSALGDGASPVAEQVK	1xDeamidated [Q]; 1xPhospho [S13(100)]	1xDeamidated [Q6; Q25]; 1xPhospho [Y1(0); S13(100); S20(0)]	NP_001240608	0.00306403	0	Slc7a7	solute carrier family 7 (cationic amino acid transporter, y+ system), member 7	20540	Slc7a7	14|14 C2	protein-coding	-2σ	18.0277	18.2674	18.5992	18.8335	18.0343	17.6882	16.8322	17.3857	17.1531	17.2035
1932	37	Q9Z0P4_SETLVNAQQTPLGTPK_1xDeamidated [Q/N]; 2xPhospho [T10(100); T14(100)]_1xDeamidated [N6; Q8; Q9]; 2xPhospho [S1(0); T3(0); T10(100); T14(100)]	Q9Z0P4	Palm	5	5	16.9824	16.0191	16.5008	0.000872258	1.94977	1.94977	12Mo-KO_1Way up vs WT	1.44606	2.62893	0.963302	Q9Z0P4	SETLVNAQQTPLGTPK	1xDeamidated [Q/N]; 2xPhospho [T10(100); T14(100)]	1xDeamidated [N6; Q8; Q9]; 2xPhospho [S1(0); T3(0); T10(100); T14(100)]	NP_001155219	0.0101601	0	Palm	paralemmin	18483	Palm	10 C1|10 39.72 cM	protein-coding	+2σ	16.0931	16.1132	16.0653	16.4352	15.3887	17.1299	16.7898	16.8168	17.1314	17.0441
1374	38	Q8C8U0_GSQGTSPFPMSPPSPDSR_1xPhospho [S17(100)]_1xPhospho [S2(0); T5(0); S6(0); S11(0); S14(0); S17(100)]	Q8C8U0	Ppfibp1	5	5	16.8232	14.9253	15.8742	0.000914889	3.72673	3.72673	12Mo-KO_1Way up vs WT	2.05903	6.74519	1.89791	Q8C8U0	GSQGTSPFPMSPPSPDSR	1xPhospho [S17(100)]	1xPhospho [S2(0); T5(0); S6(0); S11(0); S14(0); S17(100)]	NP_001163904	0.0774458	0.00161377	Ppfibp1	PTPRF interacting protein, binding protein 1 (liprin beta 1)	67533	Ppfibp1	6|6 G3	protein-coding	+6σ	15.2355	13.6073	15.3625	15.73	14.6911	16.9513	16.7333	16.8518	16.7639	16.8155
1334	39	Q9ERG0_SDNEETLGRPAQPPNAGESPHSPGVEDAPIAK_1xDeamidated [N/Q]; 1xPhospho [S22(100)]_1xDeamidated [N3; Q12; N15]; 1xPhospho [S1(0); T6(0); S19(0); S22(100)]	Q9ERG0	Lima1	5	5	17.5991	18.3891	17.9941	0.000981267	0.578324	-1.72914	12Mo-KO_1Way down vs WT	-2.21968	-1.347	-0.790051	Q9ERG0	SDNEETLGRPAQPPNAGESPHSPGVEDAPIAK	1xDeamidated [N/Q]; 1xPhospho [S22(100)]	1xDeamidated [N3; Q12; N15]; 1xPhospho [S1(0); T6(0); S19(0); S22(100)]	NP_001107017	0.0147946	0	Lima1	LIM domain and actin binding 1	65970	Lima1	15 F1|15 56.13 cM	protein-coding	-2σ	18.6573	18.4805	18.0944	18.4945	18.219	17.2326	17.7609	17.4225	17.6987	17.8808
1962	40	O88492_ATNHGVGQAILTSTESLCCETSSFSDK_2xCarbamidomethyl [C18; C19]; 2xDeamidated [N3; Q8]; 1xPhospho [T14(78.5)]_2xCarbamidomethyl [C18; C19]; 2xDeamidated [N3; Q8]; 1xPhospho [T2(3.5); T12(0.8); S13(16.3); T14(78.5); S16(0.8); T21(0); S22(0); S23(0); S25(0)]ｪ'ﾖ$b*	O88492	Plin4	5	5	17.4965	18.539	18.0177	0.00104613	0.485486	-2.05979	12Mo-KO_1Way down vs WT	-2.8735	-1.47651	-1.0425	O88492	ATNHGVGQAILTSTESLCCETSSFSDK	2xCarbamidomethyl [C18; C19]; 2xDeamidated [N3; Q8]; 1xPhospho [T14(78.5)]	2xCarbamidomethyl [C18; C19]; 2xDeamidated [N3; Q8]; 1xPhospho [T2(3.5); T12(0.8); S13(16.3); T14(78.5); S16(0.8); T21(0); S22(0); S23(0); S25(0)]ｪ'ﾖ$b*	NP_065593	0.000622611	0	Plin4	perilipin 4	57435	Plin4	17|17 D	protein-coding	-2σ	18.47	19.1136	18.4345	18.1054	18.5714	17.3353	17.5353	17.9046	17.5747	17.1324
2918	41	Q8BYJ6_TSSTCSNESLNAGGTPVTPR_1xCarbamidomethyl [C5]; 1xDeamidated [N]; 2xPhospho [T4(77.3); T/S]_1xCarbamidomethyl [C5]; 1xDeamidated [N7; N11]; 2xPhospho [T1(49.8); S2(49.8); S3(20.1); T4(77.3); S6(2.9); S9(0); T15(0); T18(0)]	Q8BYJ6	Tbc1d4	5	5	15.6267	16.2277	15.9272	0.00109237	0.659273	-1.51682	12Mo-KO_1Way down vs WT	-1.84025	-1.25024	-0.601052	Q8BYJ6	TSSTCSNESLNAGGTPVTPR	1xCarbamidomethyl [C5]; 1xDeamidated [N]; 2xPhospho [T4(77.3); T/S]	1xCarbamidomethyl [C5]; 1xDeamidated [N7; N11]; 2xPhospho [T1(49.8); S2(49.8); S3(20.1); T4(77.3); S6(2.9); S9(0); T15(0); T18(0)]	NP_001074747	0.0147946	0	Tbc1d4	TBC1 domain family, member 4	210789	Tbc1d4	14|14 E2.3	protein-coding	-2σ	16.3679	16.0321	16.3716	16.4018	15.9651	15.4828	15.4082	15.7627	15.7714	15.7081
959	42	Q9DB70_NPPPQDYESDDESYEVLDLTEYAR_1xDeamidated [Q/N]; 1xPhospho [S9(100)]_1xDeamidated [N1; Q5]; 1xPhospho [Y7(0); S9(100); S13(0); Y14(0); T20(0); Y22(0)]	Q9DB70	Fundc1	5	5	14.9644	18.2043	16.5844	0.00120216	0.105847	-9.44762	12Mo-KO_1Way down vs WT	-27.2171	-3.27947	-3.23995	Q9DB70	NPPPQDYESDDESYEVLDLTEYAR	1xDeamidated [Q/N]; 1xPhospho [S9(100)]	1xDeamidated [N1; Q5]; 1xPhospho [Y7(0); S9(100); S13(0); Y14(0); T20(0); Y22(0)]	NP_001300674	0.00401836	0	Fundc1	FUN14 domain containing 1	72018	Fundc1	X|X A1.2	protein-coding	-6σ	19.3798	19.6894	17.829	16.0653	18.0581	14.4941	15.1355	14.7652	15.3251	15.1019
3030	43	A2ASS6_KGSGEEEEIDIMELLK_1xPhospho [S3(100)]_1xPhospho [S3(100)]	A2ASS6	---	5	5	17.0448	14.8676	15.9562	0.00125159	4.5227	4.5227	12Mo-KO_1Way up vs WT	2.211	9.25135	2.17718	A2ASS6	KGSGEEEEIDIMELLK	1xPhospho [S3(100)]	1xPhospho [S3(100)]	---	0.000753101	0	Ttn	titin	22138	Ttn	2 C3|2 45.13 cM	protein-coding	+6σ	14.4194	14.4194	16.1425	14.7903	14.5667	17.1851	15.9018	17.7388	17.3219	17.0764
826	44	E9QP49_ATDDDMQSLASLMSVKPSDVGNLDDFAESDEEEANGPGAPEVR_1xDeamidated [Q/N]; 1xPhospho [T2(99.2)]_1xDeamidated [Q7; N22; N35]; 1xPhospho [T2(99.2); S8(0.5); S11(0.2); S14(0.1); S18(0); S29(0)]	E9QP49	Ehbp1l1	5	5	17.9809	16.6861	17.3335	0.00127168	2.45334	2.45334	12Mo-KO_1Way up vs WT	1.6012	3.75898	1.29475	E9QP49	ATDDDMQSLASLMSVKPSDVGNLDDFAESDEEEANGPGAPEVR	1xDeamidated [Q/N]; 1xPhospho [T2(99.2)]	1xDeamidated [Q7; N22; N35]; 1xPhospho [T2(99.2); S8(0.5); S11(0.2); S14(0.1); S18(0); S29(0)]	NP_001108069	0.0018157	0	Ehbp1l1	EH domain binding protein 1-like 1	114601	Ehbp1l1	19|19 A	protein-coding	+3σ	17.4114	16.8551	16.8433	15.8961	16.4249	17.7074	18.0426	18.1656	18.1368	17.8521
1171	45	G5E8J6_SHSHEDEDGIVSSEYHR_2xPhospho [S3(97.5); S12(99.6)]_2xPhospho [S1(2.5); S3(97.5); S12(99.6); S13(0.4); Y15(0)]	G5E8J6	Hrc	5	5	17.6025	16.8465	17.2245	0.00133228	1.68885	1.68885	12Mo-KO_1Way up vs WT	1.31389	2.17082	0.756044	G5E8J6	SHSHEDEDGIVSSEYHR	2xPhospho [S3(97.5); S12(99.6)]	2xPhospho [S1(2.5); S3(97.5); S12(99.6); S13(0.4); Y15(0)]	NP_034603	0.00928211	0	Hrc	histidine rich calcium binding protein	15464	Hrc	7 B3|7 29.26 cM	protein-coding	+2σ	16.6004	16.9136	17.115	16.9116	16.692	17.2384	17.3926	17.6394	17.8173	17.9249
602	46	P49586_QSPSSSPTHER_1xPhospho [S/T]_1xPhospho [S2(0); S4(0.3); S5(49.9); S6(49.9); T8(0)]	P49586	Pcyt1a	5	5	15.104	13.6579	14.381	0.00152679	2.72462	2.72462	12Mo-KO_1Way up vs WT	1.66749	4.45193	1.44606	P49586	QSPSSSPTHER	1xPhospho [S/T]	1xPhospho [S2(0); S4(0.3); S5(49.9); S6(49.9); T8(0)]	NP_001156631	0.0261826	0.00049971	Pcyt1a	phosphate cytidylyltransferase 1, choline, alpha isoform	13026	Pcyt1a	16 B3|16 22.69 cM	protein-coding	+3σ	12.7786	14.1463	13.2393	13.6803	14.4451	15.2299	15.1756	14.8846	15.0413	15.1886
1837	47	P62960_NEGSESAPEGQAQQR_1xPhospho [S4(91.7)]_1xPhospho [S4(91.7); S6(8.3)]	P62960	Ybx1	5	5	18.7819	19.2412	19.0115	0.0015624	0.727315	-1.37492	12Mo-KO_1Way down vs WT	-1.60795	-1.17566	-0.459347	P62960	NEGSESAPEGQAQQR	1xPhospho [S4(91.7)]	1xPhospho [S4(91.7); S6(8.3)]	NP_035862	0.00358482	0	Ybx1	Y box protein 1	22608	Ybx1	4|4 D2.1	protein-coding	-1σ	19.4417	19.0774	19.1818	19.2526	19.2526	19.0097	18.9117	18.7354	18.6549	18.5974
768	48	S4R1P5_QEEGGSDGEEPVTAQSSEQTK_1xPhospho [S6(100)]_1xPhospho [S6(100); T13(0); S16(0); S17(0); T20(0)]	S4R1P5	Dst	5	5	16.0497	16.9063	16.478	0.00162713	0.552256	-1.81075	12Mo-KO_1Way down vs WT	-2.42945	-1.34961	-0.85659	S4R1P5	QEEGGSDGEEPVTAQSSEQTK	1xPhospho [S6(100)]	1xPhospho [S6(100); T13(0); S16(0); S17(0); T20(0)]	NP_001263693	0.00351725	0	Dst	dystonin	13518	Dst	1 B|1 12.91 cM	protein-coding	-2σ	17.0513	16.5131	17.0979	17.1063	16.7632	15.5068	16.1086	16.21	16.0953	16.3281
738	49	Q64511_VKASPITNDGEDEFVPSDGLDKDEYAFSSGK_1xDeamidated [N8]; 1xPhospho [S4(84.3)]_1xDeamidated [N8]; 1xPhospho [S4(84.3); T7(15.7); S17(0); Y25(0); S28(0); S29(0)]	Q64511	Top2b	5	5	19.1843	16.8094	17.9968	0.00167813	5.18724	5.18724	12Mo-KO_1Way up vs WT	2.28668	11.7671	2.37497	Q64511	VKASPITNDGEDEFVPSDGLDKDEYAFSSGK	1xDeamidated [N8]; 1xPhospho [S4(84.3)]	1xDeamidated [N8]; 1xPhospho [S4(84.3); T7(15.7); S17(0); Y25(0); S28(0); S29(0)]	NP_033435	0.00105568	0	Top2b	topoisomerase (DNA) II beta	21974	Top2b	14|14 A1	protein-coding	+6σ	17.3838	16.9844	17.4784	17.213	14.9871	18.92	18.6408	19.9434	19.115	19.3023
2247	50	A6H6A9_ESDKEEPITPTSAGGPMSPQEDEAEEESDNELSSGTGDVSK_2xDeamidated [Q20; N30]; 2xPhospho [S2(99.6); T11(77.2)]_2xDeamidated [Q20; N30]; 2xPhospho [S2(99.6); T9(10.9); T11(77.2); S12(10.6); S18(1.7); S28(0.1); S33(0); S34(0); T36(0); S40(0)]	A6H6A9	Rabgap1l	5	5	16.3481	15.3538	15.8509	0.00168517	1.99215	1.99215	12Mo-KO_1Way up vs WT	1.41346	2.80775	0.994325	A6H6A9	ESDKEEPITPTSAGGPMSPQEDEAEEESDNELSSGTGDVSK	2xDeamidated [Q20; N30]; 2xPhospho [S2(99.6); T11(77.2)]	2xDeamidated [Q20; N30]; 2xPhospho [S2(99.6); T9(10.9); T11(77.2); S12(10.6); S18(1.7); S28(0.1); S33(0); S34(0); T36(0); S40(0)]	NP_001033710	0.00242697	0	Rabgap1l	RAB GTPase activating protein 1-like	29809	Rabgap1l	1|1 H2.1	protein-coding	+2σ	15.5547	15.3207	14.8143	15.3846	15.6948	16.6542	16.4224	15.8049	16.25	16.6092
563	51	Q63918_GNNSAVGSNADLTIEEDEEEEPVALQQAQQVR_3xDeamidated [N/Q]; 1xPhospho [S4(77.2)]_3xDeamidated [N2; N3; N9; Q26; Q27; Q29; Q30]; 1xPhospho [S4(77.2); S8(18.3); T13(4.5)]	Q63918	Cavin2	5	5	21.6085	19.957	20.7828	0.00174499	3.14169	3.14169	12Mo-KO_1Way up vs WT	1.77084	5.57372	1.65154	Q63918	GNNSAVGSNADLTIEEDEEEEPVALQQAQQVR	3xDeamidated [N/Q]; 1xPhospho [S4(77.2)]	3xDeamidated [N2; N3; N9; Q26; Q27; Q29; Q30]; 1xPhospho [S4(77.2); S8(18.3); T13(4.5)]	NP_620080	0.000302135	0	Cavin2	caveolae associated 2	20324	Cavin2	1|1 C1.1	protein-coding	+3σ	20.2246	18.6936	19.8776	20.886	20.1031	21.689	21.592	21.5439	21.5663	21.6513
1447	52	P14873_DVMSDETNNEETESPSQEFVNITK_1xDeamidated [Q/N]; 1xPhospho [S14(83.9)]_1xDeamidated [N8; N9; Q17]; 1xPhospho [S4(0.6); T7(0); T12(15.4); S14(83.9); S16(0.1); T23(0)]	P14873	Map1b	5	5	18.1314	18.7668	18.4491	0.00180074	0.643769	-1.55335	12Mo-KO_1Way down vs WT	-1.93893	-1.24445	-0.635384	P14873	DVMSDETNNEETESPSQEFVNITK	1xDeamidated [Q/N]; 1xPhospho [S14(83.9)]	1xDeamidated [N8; N9; Q17]; 1xPhospho [S4(0.6); T7(0); T12(15.4); S14(83.9); S16(0.1); T23(0)]	NP_032660	0.00479167	0	Map1b	microtubule-associated protein 1B	17755	Map1b	13 D1|13 52.9 cM	protein-coding	-2σ	18.6767	18.4496	18.7149	19.1632	18.8297	18.1398	18.2929	18.2361	17.8571	18.1313
3171	53	A2AQJ6_WVEENVPSSVTDVALPALLDSDEER_1xDeamidated [N5]; 1xPhospho [S21(100)]_1xDeamidated [N5]; 1xPhospho [S8(0); S9(0); T11(0); S21(100)]	A2AQJ6	Tmem87a	5	5	18.2017	17.6109	17.9063	0.00192852	1.50605	1.50605	12Mo-KO_1Way up vs WT	1.22258	1.85525	0.590771	A2AQJ6	WVEENVPSSVTDVALPALLDSDEER	1xDeamidated [N5]; 1xPhospho [S21(100)]	1xDeamidated [N5]; 1xPhospho [S8(0); S9(0); T11(0); S21(100)]	NP_776095	0.000281328	0	Tmem87a	transmembrane protein 87A	211499	Tmem87a	2|2 E5	protein-coding	+2σ	17.321	17.8702	17.3537	17.7606	17.749	18.2529	18.3812	18.0339	18.261	18.0794
3214	54	Q6PB44_GAAAADLLSSSPESQHGGTQPPGGGQPLLQPTK_1xDeamidated [Q]; 1xPhospho [S/T]_1xDeamidated [Q15; Q20; Q26; Q30]; 1xPhospho [S9(66.6); S10(14.9); S11(14.9); S14(3.5); T19(0.1); T32(0)]	Q6PB44	Ptpn23	5	5	17.6704	18.39	18.0302	0.00204841	0.607277	-1.64669	12Mo-KO_1Way down vs WT	-2.12835	-1.27404	-0.719572	Q6PB44	GAAAADLLSSSPESQHGGTQPPGGGQPLLQPTK	1xDeamidated [Q]; 1xPhospho [S/T]	1xDeamidated [Q15; Q20; Q26; Q30]; 1xPhospho [S9(66.6); S10(14.9); S11(14.9); S14(3.5); T19(0.1); T32(0)]	NP_001074512	0.0173093	0	Ptpn23	protein tyrosine phosphatase, non-receptor type 23	104831	Ptpn23	9|9 F2	protein-coding	-2σ	18.6079	18.3728	18.6452	18.0581	18.266	17.7935	17.6839	17.5436	17.3152	18.0159
998	55	Q8K284_VAASPRPGAEEQAEAQAPAQLAAPEDADAGGPR_1xDeamidated [Q]; 1xPhospho [S4(100)]_1xDeamidated [Q12; Q16; Q20]; 1xPhospho [S4(100)]	Q8K284	Gtf3c1	5	5	16.4734	15.7472	16.1103	0.00219361	1.65429	1.65429	12Mo-KO_1Way up vs WT	1.27305	2.1497	0.726211	Q8K284	VAASPRPGAEEQAEAQAPAQLAAPEDADAGGPR	1xDeamidated [Q]; 1xPhospho [S4(100)]	1xDeamidated [Q12; Q16; Q20]; 1xPhospho [S4(100)]	NP_997122	0.00959639	0	Gtf3c1	general transcription factor III C 1	233863	Gtf3c1	7 F3|7 69.01 cM	protein-coding	+2σ	15.9817	15.6492	16.0514	15.5547	15.4989	16.7832	16.5204	16.0498	16.4796	16.534
1821	56	D3YUV1_VESSSLAPGLTSVSPPVTSTTSAASPEEEEESEDESEILEESPCGR_1xCarbamidomethyl [C44]; 1xPhospho [S36(93.2)]_1xCarbamidomethyl [C44]; 1xPhospho [S3(0); S4(0); S5(0); T11(0); S12(0); S14(0); T18(0); S19(0); T20(0); T21(0.1); S22(0.1); S25(0.3); S32(1.8); S36(93.2);ｪ'ﾖ$b*	D3YUV1	Nrbp1	5	5	18.7558	17.6765	18.2161	0.00224398	2.11293	2.11293	12Mo-KO_1Way up vs WT	1.42942	3.12327	1.07925	D3YUV1	VESSSLAPGLTSVSPPVTSTTSAASPEEEEESEDESEILEESPCGR	1xCarbamidomethyl [C44]; 1xPhospho [S36(93.2)]	1xCarbamidomethyl [C44]; 1xPhospho [S3(0); S4(0); S5(0); T11(0); S12(0); S14(0); T18(0); S19(0); T20(0); T21(0.1); S22(0.1); S25(0.3); S32(1.8); S36(93.2);ｪ'ﾖ$b*	NP_001334255	0.074604	0.00144181	Nrbp1	nuclear receptor binding protein 1	192292	Nrbp1	5|5 B1	protein-coding	+2σ	17.4429	17.3357	17.6168	17.4413	18.546	18.5945	18.4719	18.92	19.0322	18.7603
185	57	Q9QYC0_EKSPPDQSAVPNTPPSTPVKLEEDLPQEPTSR_1xDeamidated [Q/N]; 2xPhospho [T17(77.6); S/T]_1xDeamidated [Q7; N12; Q27]; 2xPhospho [S3(72.8); S8(20.9); T13(6.2); S16(22.4); T17(77.6); T30(0); S31(0)]	Q9QYC0	Add1	5	5	18.1185	16.6245	17.3715	0.00226139	2.81682	2.81682	12Mo-KO_1Way up vs WT	1.63867	4.84203	1.49407	Q9QYC0	EKSPPDQSAVPNTPPSTPVKLEEDLPQEPTSR	1xDeamidated [Q/N]; 2xPhospho [T17(77.6); S/T]	1xDeamidated [Q7; N12; Q27]; 2xPhospho [S3(72.8); S8(20.9); T13(6.2); S16(22.4); T17(77.6); T30(0); S31(0)]	NP_001019629	0.00631407	0	Add1	adducin 1 (alpha)	11518	Add1	5 B2|5 17.9 cM	protein-coding	+3σ	17.0498	16.4681	17.0363	16.8347	15.7334	17.8588	17.9502	17.9333	19.044	17.8064
1923	58	F7AA26_EGSEQQEPEATVEEAGSQTPGSEKPQGMFAPPQVSSPVQEK_2xPhospho [S/T]_2xPhospho [S3(0.1); T11(1.1); S17(22.7); T19(53.3); S22(22.7); S35(30.2); S36(70)]	F7AA26	---	5	5	16.8604	15.8617	16.361	0.00233334	1.99823	1.99823	12Mo-KO_1Way up vs WT	1.38847	2.87576	0.998721	F7AA26	EGSEQQEPEATVEEAGSQTPGSEKPQGMFAPPQVSSPVQEK	2xPhospho [S/T]	2xPhospho [S3(0.1); T11(1.1); S17(22.7); T19(53.3); S22(22.7); S35(30.2); S36(70)]	---	0.0196815	0	Pakap	paralemmin A kinase anchor protein	677884	Pakap	4 B3|4	protein-coding	+2σ	16.4854	15.5236	15.5643	16.1762	15.5589	16.9668	17.0352	16.4324	16.8354	17.0322
1055	59	Q9JLM9_SVSENSLVAMDFSGEK_1xPhospho [S6(83.4)]_1xPhospho [S1(2.6); S3(14.1); S6(83.4); S13(0)]	Q9JLM9	Grb14	5	5	17.5327	16.3056	16.9191	0.00240633	2.34089	2.34089	12Mo-KO_1Way up vs WT	1.49315	3.66993	1.22705	Q9JLM9	SVSENSLVAMDFSGEK	1xPhospho [S6(83.4)]	1xPhospho [S1(2.6); S3(14.1); S6(83.4); S13(0)]	NP_057928	0.049744	0.000921163	Grb14	growth factor receptor bound protein 14	50915	Grb14	2|2 C1.3	protein-coding	+3σ	16.6647	16.5932	16.2687	16.5093	15.4921	17.5567	17.7689	16.8203	17.7703	17.7472
935	60	P11276_TNTNVNCPIECFMPLDVQADRDDSRE_2xCarbamidomethyl [C7; C11]; 1xDeamidated [Q/N]; 1xPhospho [S24(100)]_2xCarbamidomethyl [C7; C11]; 1xDeamidated [N2; N4; N6; Q18]; 1xPhospho [T1(0); T3(0); S24(100)]	P11276	Fn1	5	5	20.3663	20.9072	20.6367	0.00253284	0.68733	-1.4549	12Mo-KO_1Way down vs WT	-1.77696	-1.19122	-0.540925	P11276	TNTNVNCPIECFMPLDVQADRDDSRE	2xCarbamidomethyl [C7; C11]; 1xDeamidated [Q/N]; 1xPhospho [S24(100)]	2xCarbamidomethyl [C7; C11]; 1xDeamidated [N2; N4; N6; Q18]; 1xPhospho [T1(0); T3(0); S24(100)]	NP_034363	0.0325869	0.00049971	Fn1	fibronectin 1	14268	Fn1	1 C3|1 36.05 cM	protein-coding	-1σ	21.3472	20.6851	20.8688	20.7865	20.8484	20.3373	20.201	20.3886	20.3926	20.5118
1496	61	P47811_HTDDEMTGYVATR_1xPhospho [T12(98.9)]_1xPhospho [T2(0); T7(0.6); Y9(0.6); T12(98.9)]	P47811	Mapk14	5	5	16.0286	17.3086	16.6686	0.00255256	0.411797	-2.42838	12Mo-KO_1Way down vs WT	-3.90021	-1.51198	-1.28	P47811	HTDDEMTGYVATR	1xPhospho [T12(98.9)]	1xPhospho [T2(0); T7(0.6); Y9(0.6); T12(98.9)]	NP_001161980	0.202221	0.00788275	Mapk14	mitogen-activated protein kinase 14	26416	Mapk14	17 A3.3|17 14.85 cM	protein-coding	-3σ	17.6567	16.7855	17.0423	17.8481	17.2104	15.3943	15.9226	16.0912	15.9529	16.782
1235	62	Q5DTX6_AEGHASSPQPQSEGTCK_1xCarbamidomethyl [C16]; 1xPhospho [S7(87.9)]_1xCarbamidomethyl [C16]; 1xPhospho [S6(12.1); S7(87.9); S12(0); T15(0)]	Q5DTX6	Jcad	5	5	16.3471	15.6264	15.9868	0.00263334	1.64795	1.64795	12Mo-KO_1Way up vs WT	1.26028	2.15488	0.720676	Q5DTX6	AEGHASSPQPQSEGTCK	1xCarbamidomethyl [C16]; 1xPhospho [S7(87.9)]	1xCarbamidomethyl [C16]; 1xPhospho [S6(12.1); S7(87.9); S12(0); T15(0)]	NP_001075432	0.0250853	0.000280731	Jcad	junctional cadherin 5 associated	240185	Jcad	18|18 A1	protein-coding	+2σ	15.5098	15.8649	15.7133	15.4094	15.6347	16.4195	16.6067	16.6424	16.2351	15.8318
289	63	A0A0U1RPL0_TESILDKEDKVPMAGVGGTEGPEQLPAPCPSQTGSPPVGLIK_1xCarbamidomethyl [C29]; 1xDeamidated [Q]; 1xPhospho [T/S]_1xCarbamidomethyl [C29]; 1xDeamidated [Q24; Q32]; 1xPhospho [T1(0); S3(0); T19(0); S31(18); T33(64); S35(18)]	A0A0U1RPL0	---	5	5	18.2834	19.0264	18.6549	0.00268216	0.597463	-1.67374	12Mo-KO_1Way down vs WT	-2.20886	-1.26826	-0.743079	A0A0U1RPL0	TESILDKEDKVPMAGVGGTEGPEQLPAPCPSQTGSPPVGLIK	1xCarbamidomethyl [C29]; 1xDeamidated [Q]; 1xPhospho [T/S]	1xCarbamidomethyl [C29]; 1xDeamidated [Q24; Q32]; 1xPhospho [T1(0); S3(0); T19(0); S31(18); T33(64); S35(18)]	---	0.0504564	0.000921163	Atxn2l	ataxin 2-like	233871	Atxn2l	7|7 F3	protein-coding	-2σ	19.2883	18.805	18.6367	19.492	18.9101	18.2803	18.0339	18.4208	18.2546	18.4272
1311	64	A0A1L1SSC0_SSPVPIDDDTASIVSSDR_1xPhospho [S/T]_1xPhospho [S1(50); S2(50); T10(0); S12(0); S15(0); S16(0)]	A0A1L1SSC0	---	5	5	20.4327	20.7812	20.607	0.00275858	0.785411	-1.27322	12Mo-KO_1Way down vs WT	-1.45104	-1.11719	-0.34848	A0A1L1SSC0	SSPVPIDDDTASIVSSDR	1xPhospho [S/T]	1xPhospho [S1(50); S2(50); T10(0); S12(0); S15(0); S16(0)]	---	6.50004e-05	0	Lrrfip2	leucine rich repeat (in FLII) interacting protein 2	71268	Lrrfip2	9|9 F3	protein-coding	-1σ	20.925	20.5526	20.6212	20.9335	20.8735	20.4464	20.3979	20.4418	20.47	20.4073
1777	65	A0A0G2JEX1_KREDEEEEEGSIVNGSTTEDEEQTR_1xDeamidated [N14]; 2xPhospho [T24(99.9); S/T]_1xDeamidated [N14; Q23]; 2xPhospho [S11(0); S16(33.4); T17(33.4); T18(33.4); T24(99.9)]	A0A0G2JEX1	---	5	5	16.1791	17.2759	16.7275	0.00283425	0.467574	-2.1387	12Mo-KO_1Way down vs WT	-3.23349	-1.41458	-1.09673	A0A0G2JEX1	KREDEEEEEGSIVNGSTTEDEEQTR	1xDeamidated [N14]; 2xPhospho [T24(99.9); S/T]	1xDeamidated [N14; Q23]; 2xPhospho [S11(0); S16(33.4); T17(33.4); T18(33.4); T24(99.9)]	---	0.000133311	0	Nexn	nexilin	68810	Nexn	3|3 H3	protein-coding	-2σ	17.763	17.4075	16.9463	17.3816	16.8811	16.2603	16.3679	16.3139	15.4002	16.5535
1989	66	A0A0N4SWG4_RSSLNSINSSDAK_1xDeamidated [N]; 1xPhospho [S3(99)]_1xDeamidated [N5; N8]; 1xPhospho [S2(1); S3(99); S6(0); S9(0); S10(0)]	A0A0N4SWG4	---	5	5	17.9857	17.4177	17.7017	0.00296923	1.48242	1.48242	12Mo-KO_1Way up vs WT	1.19467	1.83947	0.567955	A0A0N4SWG4	RSSLNSINSSDAK	1xDeamidated [N]; 1xPhospho [S3(99)]	1xDeamidated [N5; N8]; 1xPhospho [S2(1); S3(99); S6(0); S9(0); S10(0)]	---	0.0061364	0	Pde1c	phosphodiesterase 1C	18575	Pde1c	6 B3|6 27.65 cM	protein-coding	+2σ	17.5042	17.402	17.4382	17.0788	17.6654	18.1876	17.9424	17.7027	17.8901	18.2056
777	67	P11531_VVGSQTSESMGEEDLLSPPQDTSTGLEEVMEQLNNSFPSSR_1xDeamidated [Q/N]; 1xPhospho [T/S]_1xDeamidated [Q5; Q20; Q32; N34; N35]; 1xPhospho [S4(7.8); T6(66.9); S7(22.4); S9(2.8); S17(0.1); T22(0); S23(0); T24(0); S36(0); S39(0); S40(0)]	P11531	Dmd	5	5	14.9326	16.7646	15.8486	0.00307778	0.280869	-3.56038	12Mo-KO_1Way down vs WT	-7.17317	-1.76718	-1.83203	P11531	VVGSQTSESMGEEDLLSPPQDTSTGLEEVMEQLNNSFPSSR	1xDeamidated [Q/N]; 1xPhospho [T/S]	1xDeamidated [Q5; Q20; Q32; N34; N35]; 1xPhospho [S4(7.8); T6(66.9); S7(22.4); S9(2.8); S17(0.1); T22(0); S23(0); T24(0); S36(0); S39(0); S40(0)]	NP_031894	0.00336985	0	Dmd	dystrophin, muscular dystrophy	13405	Dmd	X C1|X 38.38 cM	protein-coding	-6σ	16.1397	17.2817	16.813	16.8775	16.711	13.3996	15.0031	15.6379	15.1964	15.4258
1176	68	A0A0R4J008_MLPHAPGVQMQAIPEDAVHEDSGDEDGEDPDKR_1xDeamidated [Q]; 1xPhospho [S22(100)]_1xDeamidated [Q9; Q11]; 1xPhospho [S22(100)]	A0A0R4J008	Hdac2	5	5	15.7067	18.3482	17.0275	0.00315389	0.160257	-6.23999	12Mo-KO_1Way down vs WT	-17.2068	-2.26291	-2.64154	A0A0R4J008	MLPHAPGVQMQAIPEDAVHEDSGDEDGEDPDKR	1xDeamidated [Q]; 1xPhospho [S22(100)]	1xDeamidated [Q9; Q11]; 1xPhospho [S22(100)]	NP_032255	0.000902313	0	Hdac2	histone deacetylase 2	15182	Hdac2	10 19.44 cM|10 B1	protein-coding	-6σ	20.5969	17.7398	17.8373	18.3523	17.2149	15.975	15.3491	15.652	15.1197	16.4377
1612	69	Q9QVP4_QAQRGSSNVFSMFEQAQIQEFK_1xDeamidated [Q/N]; 1xOxidation [M12]; 2xPhospho [S6(99.8); S7(100)]_1xDeamidated [Q1; Q3; N8; Q15; Q17; Q19]; 1xOxidation [M12]; 2xPhospho [S6(99.8); S7(100); S11(0.3)]	Q9QVP4	Myl7	5	5	19.5685	18.7412	19.1548	0.00319113	1.7743	1.7743	12Mo-KO_1Way up vs WT	1.29059	2.43931	0.82725	Q9QVP4	QAQRGSSNVFSMFEQAQIQEFK	1xDeamidated [Q/N]; 1xOxidation [M12]; 2xPhospho [S6(99.8); S7(100)]	1xDeamidated [Q1; Q3; N8; Q15; Q17; Q19]; 1xOxidation [M12]; 2xPhospho [S6(99.8); S7(100); S11(0.3)]	NP_075017	0.000885306	0	Myl7	myosin, light polypeptide 7, regulatory	17898	Myl7	11 A1|11 3.88 cM	protein-coding	+2σ	18.5096	18.3546	18.9445	19.239	18.6585	19.2675	19.5385	19.8808	19.8067	19.3488
1927	70	Q9Z0P4_SETLVNAQQTPLGTPK_2xPhospho [T10(100); T14(100)]_2xPhospho [S1(0); T3(0); T10(100); T14(100)]	Q9Z0P4	Palm	5	5	17.4763	16.683	17.0797	0.00336285	1.73295	1.73295	12Mo-KO_1Way up vs WT	1.27351	2.35813	0.793229	Q9Z0P4	SETLVNAQQTPLGTPK	2xPhospho [T10(100); T14(100)]	2xPhospho [S1(0); T3(0); T10(100); T14(100)]	NP_001155219	0.0101601	0	Palm	paralemmin	18483	Palm	10 C1|10 39.72 cM	protein-coding	+2σ	16.37	16.9557	16.4161	17.0614	16.6121	17.7874	17.8125	17.2772	17.2286	17.2757
1148	71	Q9Z204_MESEAGADDSAEEGDLLDDDDNEDRGDDQLELK_2xDeamidated [N22; Q29]; 1xPhospho [S10(94.1)]_2xDeamidated [N22; Q29]; 1xPhospho [S3(5.9); S10(94.1)]	Q9Z204	Hnrnpc	5	5	17.9733	18.9851	18.4792	0.00337365	0.495947	-2.01634	12Mo-KO_1Way down vs WT	-2.98742	-1.36092	-1.01174	Q9Z204	MESEAGADDSAEEGDLLDDDDNEDRGDDQLELK	2xDeamidated [N22; Q29]; 1xPhospho [S10(94.1)]	2xDeamidated [N22; Q29]; 1xPhospho [S3(5.9); S10(94.1)]	NP_001164452	0.00169872	0	Hnrnpc	heterogeneous nuclear ribonucleoprotein C	15381	Hnrnpc	14 C2|14 26.79 cM	protein-coding	-2σ	19.1818	18.9119	18.6859	19.101	19.0447	17.2129	18.6513	18.0042	17.9014	18.0968
481	72	E9QLJ0_RHSDTDDGPGMYFEK_1xOxidation [M11]; 1xPhospho [T5(91.1)]_1xOxidation [M11]; 1xPhospho [S3(8.9); T5(91.1); Y12(0)]	E9QLJ0	Cmya5	5	5	15.62	14.908	15.264	0.00363477	1.63812	1.63812	12Mo-KO_1Way up vs WT	1.23764	2.1682	0.712042	E9QLJ0	RHSDTDDGPGMYFEK	1xOxidation [M11]; 1xPhospho [T5(91.1)]	1xOxidation [M11]; 1xPhospho [S3(8.9); T5(91.1); Y12(0)]	NP_076310	5.14857e-05	0	Cmya5	cardiomyopathy associated 5	76469	Cmya5	13|13 C3	protein-coding	+2σ	15.2119	15.0051	15.13	14.5901	14.6027	15.9777	15.8141	15.4258	15.4047	15.4778
2617	73	D3Z5J3; Q62417_SPSANSPQSSAVSPTPDITSEPPGYIYSSNFHAVK_1xDeamidated [Q/N]; 1xPhospho [T15(94)]_1xDeamidated [N5; Q8; N30]; 1xPhospho [S1(0); S3(0); S6(0.1); S9(0.2); S10(0.2); S13(0.1); T15(94); T19(1); S20(4.4); Y25(0); Y27(0); S28(0); S29(0)]	D3Z5J3; Q62417	---	5	5	19.7846	18.2121	18.9983	0.00370039	2.97418	2.97418	12Mo-KO_1Way up vs WT	1.59819	5.53484	1.57249	D3Z5J3; Q62417	SPSANSPQSSAVSPTPDITSEPPGYIYSSNFHAVK	1xDeamidated [Q/N]; 1xPhospho [T15(94)]	1xDeamidated [N5; Q8; N30]; 1xPhospho [S1(0); S3(0); S6(0.1); S9(0.2); S10(0.2); S13(0.1); T15(94); T19(1); S20(4.4); Y25(0); Y27(0); S28(0); S29(0)]	---	0.000558086	0	Sorbs1	sorbin and SH3 domain containing 1	20411	Sorbs1	19 C3|19 34.25 cM	protein-coding	+3σ	18.7871	18.497	18.8809	16.8071	18.0886	19.858	19.4152	19.8903	19.8933	19.8664
1814	74	E9Q7G0_TQPDGTSVPGEPASPISQR_1xPhospho [S14(99.4)]_1xPhospho [T1(0); T6(0); S7(0); S14(99.4); S17(0.7)]	E9Q7G0	Numa1	5	5	19.5528	20.1377	19.8453	0.00370388	0.666718	-1.49989	12Mo-KO_1Way down vs WT	-1.88972	-1.19047	-0.584852	E9Q7G0	TQPDGTSVPGEPASPISQR	1xPhospho [S14(99.4)]	1xPhospho [T1(0); T6(0); S7(0); S14(99.4); S17(0.7)]	NP_598708	0.00038877	0	Numa1	nuclear mitotic apparatus protein 1	101706	Numa1	7|7 E2	protein-coding	-2σ	20.2636	20.0929	20.3941	19.8213	20.1165	19.5728	19.5316	19.8554	19.1832	19.6213
2947	75	E9Q0S6_ETTSDPSRTPEEEPLNLEGLVAHR_1xDeamidated [N16]; 1xPhospho [T2(82.6)]_1xDeamidated [N16]; 1xPhospho [T2(82.6); T3(15.9); S4(0.7); S7(0.2); T9(0.7)]	E9Q0S6	Tns1	5	5	18.3115	19.1195	18.7155	0.00372818	0.571189	-1.75074	12Mo-KO_1Way down vs WT	-2.4099	-1.27187	-0.807961	E9Q0S6	ETTSDPSRTPEEEPLNLEGLVAHR	1xDeamidated [N16]; 1xPhospho [T2(82.6)]	1xDeamidated [N16]; 1xPhospho [T2(82.6); T3(15.9); S4(0.7); S7(0.2); T9(0.7)]	NP_082160	0.00372387	0	Tns1	tensin 1	21961	Tns1	1 C3|1 38.17 cM	protein-coding	-2σ	19.3245	19.1179	18.9556	18.7195	19.4798	18.8698	18.0008	18.2746	18.2725	18.1398
2737	76	E9QQ25_SPEPSAVTSRDSPQPPEPQPVPEKVPEPKPEPVR_1xDeamidated [Q]; 1xPhospho [S5(95.9)]_1xDeamidated [Q14; Q19]; 1xPhospho [S1(0.2); S5(95.9); T8(3.8); S9(0.2); S12(0)]	E9QQ25	Speg	5	5	15.0837	17.9031	16.4934	0.00389272	0.141666	-7.05885	12Mo-KO_1Way down vs WT	-21.7149	-2.29462	-2.81943	E9QQ25	SPEPSAVTSRDSPQPPEPQPVPEKVPEPKPEPVR	1xDeamidated [Q]; 1xPhospho [S5(95.9)]	1xDeamidated [Q14; Q19]; 1xPhospho [S1(0.2); S5(95.9); T8(3.8); S9(0.2); S12(0)]	NP_031489	0.00448296	0	Speg	SPEG complex locus	11790	Speg	1 C4|1 38.88 cM	protein-coding	-6σ	18.6585	18.3147	18.9318	15.5878	18.0228	13.6439	15.1501	15.4878	15.5405	15.5962
1673	77	Q3UIK0_DKFDSCNFNLTVHEAIGSGDLDLR_1xCarbamidomethyl [C6]; 1xPhospho [S18(100)]_1xCarbamidomethyl [C6]; 1xPhospho [S5(0); T11(0); S18(100)]	Q3UIK0	Mybpc3	5	5	16.7086	18.0481	17.3784	0.00391802	0.395155	-2.53065	12Mo-KO_1Way down vs WT	-4.31878	-1.48287	-1.33951	Q3UIK0	DKFDSCNFNLTVHEAIGSGDLDLR	1xCarbamidomethyl [C6]; 1xPhospho [S18(100)]	1xCarbamidomethyl [C6]; 1xPhospho [S5(0); T11(0); S18(100)]	NP_032679	0.0150789	0	Mybpc3	myosin binding protein C, cardiac	17868	Mybpc3	2|2 E1	protein-coding	-3σ	18.9136	17.2449	18.2557	18.2736	17.553	16.7346	16.7705	16.1086	16.9042	17.0253
1278	78	E9Q238_SYSAGNASQLELLAR_1xPhospho [S3(99.9)]_1xPhospho [S1(0.1); Y2(0); S3(99.9); S8(0)]	E9Q238	Kank1	5	5	16.9321	16.198	16.565	0.00398693	1.66335	1.66335	12Mo-KO_1Way up vs WT	1.23986	2.2315	0.734094	E9Q238	SYSAGNASQLELLAR	1xPhospho [S3(99.9)]	1xPhospho [S1(0.1); Y2(0); S3(99.9); S8(0)]	NP_852069	0.000219677	0	Kank1	KN motif and ankyrin repeat domains 1	107351	Kank1	19|19 B	protein-coding	+2σ	16.3356	15.9043	15.8734	16.6647	16.212	16.5189	16.9425	17.179	17.0516	16.9685
546	79	Q63918_SLEETLHNVDLSSDDELPRDEEALEDSAEEKMEESR_1xDeamidated [N8]; 2xPhospho [S13(88.8); S/T]_1xDeamidated [N8]; 2xPhospho [S1(0); T5(0); S12(55.6); S13(88.8); S27(55.6); S35(0)]	Q63918	Cavin2	5	5	15.83	18.4834	17.1567	0.00402799	0.158947	-6.29139	12Mo-KO_1Way down vs WT	-18.2325	-2.17093	-2.65338	Q63918	SLEETLHNVDLSSDDELPRDEEALEDSAEEKMEESR	1xDeamidated [N8]; 2xPhospho [S13(88.8); S/T]	1xDeamidated [N8]; 2xPhospho [S1(0); T5(0); S12(55.6); S13(88.8); S27(55.6); S35(0)]	NP_620080	0.00479167	0	Cavin2	caveolae associated 2	20324	Cavin2	1|1 C1.1	protein-coding	-6σ	19.1505	19.2664	18.8789	15.8791	19.2421	15.8141	16.0457	15.3787	16.019	15.8926
682	80	O55033_DASPTPSTDAEYPANGSGADR_1xDeamidated [N15]; 1xPhospho [T5(84.1)]_1xDeamidated [N15]; 1xPhospho [S3(13.2); T5(84.1); S7(0.4); T8(2.2); Y12(0); S17(0)]	O55033	Nck2	5	5	17.0736	16.1339	16.6038	0.00412575	1.91817	1.91817	12Mo-KO_1Way up vs WT	1.31378	2.80061	0.93973	O55033	DASPTPSTDAEYPANGSGADR	1xDeamidated [N15]; 1xPhospho [T5(84.1)]	1xDeamidated [N15]; 1xPhospho [S3(13.2); T5(84.1); S7(0.4); T8(2.2); Y12(0); S17(0)]	NP_035009	0.1056	0.00260819	Nck2	non-catalytic region of tyrosine kinase adaptor protein 2	17974	Nck2	1|1 C1.1	protein-coding	+2σ	15.6151	15.8025	15.9629	16.7579	16.5311	16.8836	17.1945	16.9546	17.3719	16.9635
2111	81	Q8BHL8_DPLSPFAVGGDDLDPFGCQR_1xCarbamidomethyl [C18]; 1xPhospho [S4(100)]_1xCarbamidomethyl [C18]; 1xPhospho [S4(100)]	Q8BHL8	Psmf1	5	5	14.4252	14.9917	14.7084	0.00431674	0.67523	-1.48098	12Mo-KO_1Way down vs WT	-1.86404	-1.17664	-0.56655	Q8BHL8	DPLSPFAVGGDDLDPFGCQR	1xCarbamidomethyl [C18]; 1xPhospho [S4(100)]	1xCarbamidomethyl [C18]; 1xPhospho [S4(100)]	NP_997611	0.224964	0.00999726	Psmf1	proteasome (prosome, macropain) inhibitor subunit 1	228769	Psmf1	2|2 G3	protein-coding	-2σ	14.9059	14.5175	15.2048	15.1047	15.2257	14.5999	14.327	14.2761	14.5066	14.4164
2732	82	E9QQ25_LQESPSLSALSETQPPSPARPSVPK_1xDeamidated [Q]; 1xPhospho [S17(97.5)]_1xDeamidated [Q2; Q14]; 1xPhospho [S4(0); S6(0); S8(0); S11(0); T13(0); S17(97.5); S22(2.5)]	E9QQ25	Speg	5	5	17.8562	19.7582	18.8072	0.00462233	0.267586	-3.73712	12Mo-KO_1Way down vs WT	-8.16797	-1.70986	-1.90193	E9QQ25	LQESPSLSALSETQPPSPARPSVPK	1xDeamidated [Q]; 1xPhospho [S17(97.5)]	1xDeamidated [Q2; Q14]; 1xPhospho [S4(0); S6(0); S8(0); S11(0); T13(0); S17(97.5); S22(2.5)]	NP_031489	0.0047463	0	Speg	SPEG complex locus	11790	Speg	1 C4|1 38.88 cM	protein-coding	-6σ	19.7804	19.7154	19.86	19.8971	19.5379	19.0612	18.0898	16.1115	17.7769	18.2417
1676	83	Q3UIK0_DKFDSCNFNLTVHEAIGSGDLDLR_1xCarbamidomethyl [C6]; 1xDeamidated [N]; 1xPhospho [S18(100)]_1xCarbamidomethyl [C6]; 1xDeamidated [N7; N9]; 1xPhospho [S5(0); T11(0); S18(100)]	Q3UIK0	Mybpc3	5	5	18.2523	19.17	18.7111	0.00470386	0.529351	-1.88911	12Mo-KO_1Way down vs WT	-2.75823	-1.29385	-0.917704	Q3UIK0	DKFDSCNFNLTVHEAIGSGDLDLR	1xCarbamidomethyl [C6]; 1xDeamidated [N]; 1xPhospho [S18(100)]	1xCarbamidomethyl [C6]; 1xDeamidated [N7; N9]; 1xPhospho [S5(0); T11(0); S18(100)]	NP_032679	0.0150789	0	Mybpc3	myosin binding protein C, cardiac	17868	Mybpc3	2|2 E1	protein-coding	-2σ	19.2329	18.9398	19.0066	19.5453	19.1253	17.7814	18.1687	18.5391	18.9096	17.8626
2782	84	A0A1B0GS91_TSLVASQDCTPLGSNMSDQEQLLNVENQR_1xCarbamidomethyl [C9]; 1xDeamidated [Q/N]; 1xPhospho [T1(82.8)]_1xCarbamidomethyl [C9]; 1xDeamidated [Q7; N15; Q19; Q21; N24; N27]; 1xPhospho [T1(82.8); S2(17.1); S6(0); T10(0.1); S14(0.1); S17(0)]	A0A1B0GS91	---	5	5	18.4862	17.9474	18.2168	0.00495234	1.45276	1.45276	12Mo-KO_1Way up vs WT	1.16085	1.81808	0.538797	A0A1B0GS91	TSLVASQDCTPLGSNMSDQEQLLNVENQR	1xCarbamidomethyl [C9]; 1xDeamidated [Q/N]; 1xPhospho [T1(82.8)]	1xCarbamidomethyl [C9]; 1xDeamidated [Q7; N15; Q19; Q21; N24; N27]; 1xPhospho [T1(82.8); S2(17.1); S6(0); T10(0.1); S14(0.1); S17(0)]	---	0.0121154	0	Svil	supervillin	225115	Svil	18|18 A1	protein-coding	+1σ	17.8267	18.1841	18.0161	18.0612	17.6488	18.596	18.4906	18.8084	18.3194	18.2166
642	85	Q3UMF0_DPQLSPEQHPSSLSER_1xPhospho [S5(100)]_1xPhospho [S5(100); S11(0); S12(0); S14(0)]	Q3UMF0	Cobll1	5	5	17.9166	16.9747	17.4457	0.0051767	1.92105	1.92105	12Mo-KO_1Way up vs WT	1.29372	2.85257	0.941893	Q3UMF0	DPQLSPEQHPSSLSER	1xPhospho [S5(100)]	1xPhospho [S5(100); S11(0); S12(0); S14(0)]	NP_081501	0.0452406	0.000921163	Cobll1	Cobl-like 1	319876	Cobll1	2|2 C1.3	protein-coding	+2σ	17.0891	16.1838	17.0383	17.1045	17.4579	18.1976	17.6055	17.7654	17.7671	18.2476
1162	86	G5E8J6_VQGREDENDDEDGDSGEYR_1xDeamidated [N/Q]; 1xPhospho [S15(100)]_1xDeamidated [Q2; N8]; 1xPhospho [S15(100); Y18(0)]	G5E8J6	Hrc	5	5	15.7593	17.1682	16.4638	0.00528102	0.376611	-2.65526	12Mo-KO_1Way down vs WT	-4.807	-1.46669	-1.40885	G5E8J6	VQGREDENDDEDGDSGEYR	1xDeamidated [N/Q]; 1xPhospho [S15(100)]	1xDeamidated [Q2; N8]; 1xPhospho [S15(100); Y18(0)]	NP_034603	0.000163569	0	Hrc	histidine rich calcium binding protein	15464	Hrc	7 B3|7 29.26 cM	protein-coding	-3σ	17.3059	16.3834	17.5739	17.2607	17.3169	15.4878	15.8926	14.7017	16.3929	16.3216
1890	87	G5E833_ENAEDSDAETQDHSR_1xPhospho [S6(99.8)]_1xPhospho [S6(99.8); T10(0); S14(0.2)]	G5E833	Osbpl5	5	5	13.8138	14.8901	14.352	0.00530519	0.474249	-2.1086	12Mo-KO_1Way down vs WT	-3.31956	-1.33939	-1.07628	G5E833	ENAEDSDAETQDHSR	1xPhospho [S6(99.8)]	1xPhospho [S6(99.8); T10(0); S14(0.2)]	NP_077251	0.00804766	0	Osbpl5	oxysterol binding protein-like 5	79196	Osbpl5	7 F5|7 88.29 cM	protein-coding	-2σ	14.949	14.9059	14.4052	15.376	14.8143	14.1142	14.1693	13.1777	14.3089	13.2989
3074	88	A2ASS6_APTPSPVR_2xPhospho [T3(100); S5(100)]_2xPhospho [T3(100); S5(100)]	A2ASS6	---	5	5	18.8914	19.8625	19.377	0.0054359	0.510094	-1.96042	12Mo-KO_1Way down vs WT	-2.95795	-1.2993	-0.971165	A2ASS6	APTPSPVR	2xPhospho [T3(100); S5(100)]	2xPhospho [T3(100); S5(100)]	---	0.0307789	0.00049971	Ttn	titin	22138	Ttn	2 C3|2 45.13 cM	protein-coding	-2σ	19.2915	20.2293	20.1689	19.4841	20.1388	19.0158	18.9309	18.9855	19.2579	18.2667
1399	89	Q8K310_RDSFDDRGPSLNPVLDYDHGSR_1xDeamidated [N12]; 1xPhospho [S3(100)]_1xDeamidated [N12]; 1xPhospho [S3(100); S10(0); Y17(0); S21(0)]	Q8K310	Matr3	5	5	15.8504	16.6061	16.2282	0.00547032	0.592262	-1.68844	12Mo-KO_1Way down vs WT	-2.32624	-1.22551	-0.755693	Q8K310	RDSFDDRGPSLNPVLDYDHGSR	1xDeamidated [N12]; 1xPhospho [S3(100)]	1xDeamidated [N12]; 1xPhospho [S3(100); S10(0); Y17(0); S21(0)]	NP_034901	0.00110711	0	Matr3	matrin 3	17184	Matr3	18 B2|18 19.14 cM	protein-coding	-2σ	16.6462	16.2473	16.1052	16.923	17.1089	16.0085	15.8803	15.6469	15.8896	15.8267
157	90	P09242_TYNTNAQVPDSAGTATAYLCGVK_1xCarbamidomethyl [C20]; 1xPhospho [S11(84.9)]_1xCarbamidomethyl [C20]; 1xPhospho [T1(0); Y2(0); T4(0.1); S11(84.9); T14(14.9); T16(0.1); Y18(0)]	P09242	Alpl	5	5	16.9277	17.4563	17.192	0.00559858	0.693241	-1.4425	12Mo-KO_1Way down vs WT	-1.80667	-1.15174	-0.52857	P09242	TYNTNAQVPDSAGTATAYLCGVK	1xCarbamidomethyl [C20]; 1xPhospho [S11(84.9)]	1xCarbamidomethyl [C20]; 1xPhospho [T1(0); Y2(0); T4(0.1); S11(84.9); T14(14.9); T16(0.1); Y18(0)]	NP_001274101	0.00340206	0	Alpl	alkaline phosphatase, liver/bone/kidney	11647	Alpl	4 D3|4 70.02 cM	protein-coding	-1σ	17.7541	17.3537	17.4998	17.24	17.4338	16.7656	16.8871	17.2495	17.1024	16.6339
426	91	P31324_RASVCAEAYNPDEEEDDAESR_1xCarbamidomethyl [C5]; 1xPhospho [S3(99.9)]_1xCarbamidomethyl [C5]; 1xPhospho [S3(99.9); Y9(0.1); S20(0)]	P31324	Prkar2b	5	5	15.6726	16.6614	16.167	0.00573212	0.503875	-1.98462	12Mo-KO_1Way down vs WT	-3.02956	-1.3001	-0.988863	P31324	RASVCAEAYNPDEEEDDAESR	1xCarbamidomethyl [C5]; 1xPhospho [S3(99.9)]	1xCarbamidomethyl [C5]; 1xPhospho [S3(99.9); Y9(0.1); S20(0)]	NP_035288	0.205721	0.00878146	Prkar2b	protein kinase, cAMP dependent regulatory, type II beta	19088	Prkar2b	12|12 A3	protein-coding	-2σ	16.7887	16.6384	16.8034	17.1264	15.9503	15.7015	15.8773	15.0215	15.6714	16.0912
237	92	P32261_ATEEDGSEQKVPEATNR_1xPhospho [S7(99.8)]_1xPhospho [T2(0.2); S7(99.8); T15(0)]	P32261	Serpinc1	5	5	17.9864	17.1298	17.5581	0.00582096	1.81074	1.81074	12Mo-KO_1Way up vs WT	1.25392	2.61483	0.856583	P32261	ATEEDGSEQKVPEATNR	1xPhospho [S7(99.8)]	1xPhospho [T2(0.2); S7(99.8); T15(0)]	NP_543120	0.0125853	0	Serpinc1	serine (or cysteine) peptidase inhibitor, clade C (antithrombin), member 1	11905	Serpinc1	1 H2.1|1 69.75 cM	protein-coding	+2σ	16.9951	17.6223	17.2544	16.4287	17.3486	17.736	18.2361	18.1094	17.7087	18.1417
1968	93	Q5BL07_SQSGEDESLNQPGPIK_1xPhospho [S3(86.4)]_1xPhospho [S1(13.5); S3(86.4); S8(0.1)]	Q5BL07	Pex1	5	5	16.1166	16.6648	16.3907	0.00590672	0.683874	-1.46226	12Mo-KO_1Way down vs WT	-1.85113	-1.15508	-0.548199	Q5BL07	SQSGEDESLNQPGPIK	1xPhospho [S3(86.4)]	1xPhospho [S1(13.5); S3(86.4); S8(0.1)]	NP_001280735	0.197069	0.00776817	Pex1	peroxisomal biogenesis factor 1	71382	Pex1	5|5 A1	protein-coding	-1σ	16.7871	17.1162	16.6759	16.2882	16.4564	16.1209	15.9923	16.1632	16.227	16.0796
2912	94	Q8K0F1_GSISSVDGESCNGSNDR_1xCarbamidomethyl [C11]; 1xDeamidated [N]; 1xPhospho [S]_1xCarbamidomethyl [C11]; 1xDeamidated [N12; N15]; 1xPhospho [S2(47.4); S4(47.4); S5(5.3); S10(0); S14(0)]	Q8K0F1	Tbc1d23	5	5	15.3484	15.9534	15.6509	0.00607331	0.657499	-1.52091	12Mo-KO_1Way down vs WT	-1.97565	-1.17085	-0.60494	Q8K0F1	GSISSVDGESCNGSNDR	1xCarbamidomethyl [C11]; 1xDeamidated [N]; 1xPhospho [S]	1xCarbamidomethyl [C11]; 1xDeamidated [N12; N15]; 1xPhospho [S2(47.4); S4(47.4); S5(5.3); S10(0); S14(0)]	NP_080530	0.00847998	0	Tbc1d23	TBC1 domain family, member 23	67581	Tbc1d23	16|16 C1.1	protein-coding	-2σ	16.079	15.6545	16.2246	15.9713	15.8376	15.3831	15.4002	15.1111	15.7925	15.0554
2921	95	Q5SVR0_ASVSDPAPESLPTPQEASEPPASPSSPLSSPPSFSTQEIPTTSQGLLK_1xDeamidated [Q]; 1xPhospho [S/T]_1xDeamidated [Q15; Q37]; 1xPhospho [S2(0.9); S4(2.4); S10(19.3); T13(19.3); S18(57.6); S23(0.4); S25(0.1); S26(0.1); S29(0); S30(0); S33(0); S35(0); T36(0); T41(0); Tｪ'ﾖ$b*	Q5SVR0	Tbc1d9b	5	5	15.674	17.8821	16.7781	0.00632388	0.21642	-4.62064	12Mo-KO_1Way down vs WT	-12.0932	-1.76548	-2.20809	Q5SVR0	ASVSDPAPESLPTPQEASEPPASPSSPLSSPPSFSTQEIPTTSQGLLK	1xDeamidated [Q]; 1xPhospho [S/T]	1xDeamidated [Q15; Q37]; 1xPhospho [S2(0.9); S4(2.4); S10(19.3); T13(19.3); S18(57.6); S23(0.4); S25(0.1); S26(0.1); S29(0); S30(0); S33(0); S35(0); T36(0); T41(0); Tｪ'ﾖ$b*	NP_001277688	0.0109636	0	Tbc1d9b	TBC1 domain family, member 9B	76795	Tbc1d9b	11|11 B1.3	protein-coding	-6σ	18.9519	17.8022	17.8943	17.374	17.388	14.4579	15.4878	17.6502	15.3187	15.4554
3202	96	Q9ERA6_TTQSLQDFPVADSEEEAEEEFQK_1xPhospho [S13(99.9)]_1xPhospho [T1(0); T2(0); S4(0.1); S13(99.9)]	Q9ERA6	Tfip11	5	5	16.3448	17.7934	17.0691	0.0064282	0.366387	-2.72935	12Mo-KO_1Way down vs WT	-5.14068	-1.4491	-1.44856	Q9ERA6	TTQSLQDFPVADSEEEAEEEFQK	1xPhospho [S13(99.9)]	1xPhospho [T1(0); T2(0); S4(0.1); S13(99.9)]	NP_061253	0.13986	0.00396376	Tfip11	tuftelin interacting protein 11	54723	Tfip11	5|5 F	protein-coding	-3σ	17.6331	17.9975	17.3516	18.1484	17.8361	16.4349	16.9606	17.164	15.0693	16.0953
2249	97	Q9JM13_QTSIETDR_1xPhospho [T6(90.6)]_1xPhospho [T2(0); S3(9.4); T6(90.6)]	Q9JM13	Rabgef1	5	5	16.1637	16.5573	16.3605	0.00661206	0.761219	-1.31368	12Mo-KO_1Way down vs WT	-1.56173	-1.10503	-0.393616	Q9JM13	QTSIETDR	1xPhospho [T6(90.6)]	1xPhospho [T2(0); S3(9.4); T6(90.6)]	NP_001185988	0.101328	0.00244569	Rabgef1	RAB guanine nucleotide exchange factor (GEF) 1	56715	Rabgef1	5|5 G1.3	protein-coding	-1σ	16.6759	16.4625	16.3239	16.696	16.6283	16.2379	16.2859	16.3111	15.8671	16.1164
371	98	G3X9K3_VETEKQSPPHGEAK_1xPhospho [S7(100)]_1xPhospho [T3(0); S7(100)]	G3X9K3	Arfgef1	5	5	14.7005	15.6263	15.1634	0.00671783	0.526383	-1.89976	12Mo-KO_1Way down vs WT	-2.857	-1.26324	-0.925815	G3X9K3	VETEKQSPPHGEAK	1xPhospho [S7(100)]	1xPhospho [T3(0); S7(100)]	NP_001095900	0.0143101	0	Arfgef1	ADP-ribosylation factor guanine nucleotide-exchange factor 1(brefeldin A-inhibited)	211673	Arfgef1	1|1 A2	protein-coding	-2σ	16.181	15.9078	14.9671	15.3054	15.7701	15.1964	14.6769	14.6219	14.6219	14.3853
2554	99	D3YVS1_RSSLMEPDPAEPPSTTVEAANGAEQAR_1xPhospho [S3(88.4)]_1xPhospho [S2(11.6); S3(88.4); S14(0); T15(0); T16(0)]	D3YVS1	---	5	5	19.2045	18.6078	18.9062	0.00678119	1.51216	1.51216	12Mo-KO_1Way up vs WT	1.16197	1.96789	0.596613	D3YVS1	RSSLMEPDPAEPPSTTVEAANGAEQAR	1xPhospho [S3(88.4)]	1xPhospho [S2(11.6); S3(88.4); S14(0); T15(0); T16(0)]	---	0.000610877	0	Smtn	smoothelin	29856	Smtn	11|11 A1	protein-coding	+2σ	18.3624	18.8743	19.0941	18.3642	18.3442	19.23	19.149	19.3349	19.2563	19.0521
155	100	Q9WTQ5_EKEPTKPLESPTSPVSNETTSSFK_1xDeamidated [N17]; 2xPhospho [S10(97); S13(96.6)]_1xDeamidated [N17]; 2xPhospho [T5(0); S10(97); T12(5.9); S13(96.6); S16(0.1); T19(0); T20(0.1); S21(0.1); S22(0.1)]	Q9WTQ5	Akap12	5	5	17.4605	16.6305	17.0455	0.00697192	1.77767	1.77767	12Mo-KO_1Way up vs WT	1.22985	2.5695	0.829987	Q9WTQ5	EKEPTKPLESPTSPVSNETTSSFK	1xDeamidated [N17]; 2xPhospho [S10(97); S13(96.6)]	1xDeamidated [N17]; 2xPhospho [T5(0); S10(97); T12(5.9); S13(96.6); S16(0.1); T19(0); T20(0.1); S21(0.1); S22(0.1)]	NP_112462	0.101328	0.00244569	Akap12	A kinase (PRKA) anchor protein (gravin) 12	83397	Akap12	10|10 A1	protein-coding	+2σ	17.1045	15.8416	16.7632	16.813	16.6303	17.6977	17.4494	17.1418	17.4728	17.5409
1768	101	A0A0G2JEX1_KREDEEEEEGSIVNGSTTEDEEQTR_1xPhospho [S11(100)]_1xPhospho [S11(100); S16(0); T17(0); T18(0); T24(0)]	A0A0G2JEX1	---	5	5	17.9061	18.6381	18.2721	0.00715669	0.602101	-1.66085	12Mo-KO_1Way down vs WT	-2.30215	-1.1982	-0.731923	A0A0G2JEX1	KREDEEEEEGSIVNGSTTEDEEQTR	1xPhospho [S11(100)]	1xPhospho [S11(100); S16(0); T17(0); T18(0); T24(0)]	---	0.000133311	0	Nexn	nexilin	68810	Nexn	3|3 H3	protein-coding	-2σ	18.3945	18.836	18.7218	18.6573	18.5807	18.1509	17.9555	18.4583	17.4821	17.4838
2512	102	Q5F2E8_ASDPQSPPQVSR_1xPhospho [S]_1xPhospho [S2(0); S6(50); S11(50)]	Q5F2E8	Taok1	5	5	17.0498	17.3444	17.1971	0.00731582	0.815299	-1.22654	12Mo-KO_1Way down vs WT	-1.39959	-1.07489	-0.294599	Q5F2E8	ASDPQSPPQVSR	1xPhospho [S]	1xPhospho [S2(0); S6(50); S11(50)]	NP_659074	0.0981162	0.00244569	Taok1	TAO kinase 1	216965	Taok1	11|11 B5	protein-coding	-1σ	17.39	17.2579	17.3692	17.299	17.4058	16.9373	16.8629	17.1627	17.289	16.997
1007	103	E9PYV1_SSTPAAGCATPTEK_1xCarbamidomethyl [C8]; 1xPhospho [T10(100)]_1xCarbamidomethyl [C8]; 1xPhospho [S1(0); S2(0); T3(0); T10(100); T12(0)]	E9PYV1	---	5	5	15.3617	16.2518	15.8067	0.00759252	0.539581	-1.85329	12Mo-KO_1Way down vs WT	-2.76926	-1.24029	-0.890089	E9PYV1	SSTPAAGCATPTEK	1xCarbamidomethyl [C8]; 1xPhospho [T10(100)]	1xCarbamidomethyl [C8]; 1xPhospho [S1(0); S2(0); T3(0); T10(100); T12(0)]	---	0.128412	0.00337228	Nr3c1	nuclear receptor subfamily 3, group C, member 1	14815	Nr3c1	18 B3|18 21.09 cM	protein-coding	-2σ	16.4505	15.8081	16.2268	16.3595	16.4141	15.6269	15.7321	15.4944	15.4611	14.4941
1980	104	Q99L43_LDGETASDSESRAETAPLPTSVDDTPEVLNR_1xDeamidated [N30]; 1xPhospho [T/S]_1xDeamidated [N30]; 1xPhospho [T5(55.9); S7(13.6); S9(13.6); S11(13.6); T15(3.4); T20(0); S21(0); T25(0)]	Q99L43	Cds2	5	5	18.2935	18.746	18.5197	0.00763072	0.730813	-1.36834	12Mo-KO_1Way down vs WT	-1.67856	-1.11545	-0.452426	Q99L43	LDGETASDSESRAETAPLPTSVDDTPEVLNR	1xDeamidated [N30]; 1xPhospho [T/S]	1xDeamidated [N30]; 1xPhospho [T5(55.9); S7(13.6); S9(13.6); S11(13.6); T15(3.4); T20(0); S21(0); T25(0)]	NP_001277968	0.0115526	0	Cds2	CDP-diacylglycerol synthase (phosphatidate cytidylyltransferase) 2	110911	Cds2	2 F2|2 64.15 cM	protein-coding	-1σ	18.9422	19.0687	18.4823	18.5096	18.7271	18.2891	18.0914	18.4089	18.3469	18.3314
2843	105	B2RQK7_VTDEGSVRSPSPGELQVLSPLSPLSPEPPGAPVSQALQPTSLR_2xPhospho [T2(78); S11(87.5)]_2xPhospho [T2(78); S6(8.3); S9(26.2); S11(87.5); S19(0); S22(0); S25(0); S34(0); T40(0); S41(0)]	B2RQK7	Synpo2l	5	5	20.9064	18.7734	19.8399	0.00766228	4.38622	4.38622	12Mo-KO_1Way up vs WT	1.67253	11.5029	2.13298	B2RQK7	VTDEGSVRSPSPGELQVLSPLSPLSPEPPGAPVSQALQPTSLR	2xPhospho [T2(78); S11(87.5)]	2xPhospho [T2(78); S6(8.3); S9(26.2); S11(87.5); S19(0); S22(0); S25(0); S34(0); T40(0); S41(0)]	NP_001297360	0.0463274	0.000921163	Synpo2l	synaptopodin 2-like	68760	Synpo2l	14|14 A3	protein-coding	+6σ	19.4364	17.3377	18.653	20.2673	18.1727	19.8903	21.4198	21.1208	20.424	21.6771
2516	106	Q7TSI3_SGGSTDSEEEDEEEDEEEDEGAEQAACGR_1xCarbamidomethyl [C27]; 1xPhospho [S1(76.6)]_1xCarbamidomethyl [C27]; 1xPhospho [S1(76.6); S4(18.4); T5(4.7); S7(0.4)]	Q7TSI3	Ppp6r1	5	5	17.0137	18.522	17.7678	0.00766545	0.351529	-2.84471	12Mo-KO_1Way down vs WT	-5.62531	-1.43857	-1.50828	Q7TSI3	SGGSTDSEEEDEEEDEEEDEGAEQAACGR	1xCarbamidomethyl [C27]; 1xPhospho [S1(76.6)]	1xCarbamidomethyl [C27]; 1xPhospho [S1(76.6); S4(18.4); T5(4.7); S7(0.4)]	NP_766482	0.035164	0.00049971	Ppp6r1	protein phosphatase 6, regulatory subunit 1	243819	Ppp6r1	7|7 A1	protein-coding	-3σ	19.096	17.3486	19.3477	19.0527	17.7651	17.079	17.2225	17.1587	16.4581	17.1504
3117	107	Q3TLI0_RQESGSSLEPPSGLALEDGAHVLR_1xDeamidated [Q2]; 1xPhospho [S4(93.4)]_1xDeamidated [Q2]; 1xPhospho [S4(93.4); S6(3.3); S7(3.3); S12(0)]	Q3TLI0	---	5	5	16.1616	16.9766	16.5691	0.00772228	0.568416	-1.75927	12Mo-KO_1Way down vs WT	-2.54425	-1.21648	-0.81498	Q3TLI0	RQESGSSLEPPSGLALEDGAHVLR	1xDeamidated [Q2]; 1xPhospho [S4(93.4)]	1xDeamidated [Q2]; 1xPhospho [S4(93.4); S6(3.3); S7(3.3); S12(0)]	---	0.000789791	0	Trappc10	trafficking protein particle complex 10	216131	Trappc10	10 C1|10 39.72 cM	protein-coding	-2σ	16.824	17.5754	16.6303	17.262	16.591	16.13	16.3635	16.2414	15.68	16.3929
1843	108	A0A286YDV7_AAKESEEEEEEEETEEK_1xPhospho [S5(100)]_1xPhospho [S5(100); T14(0)]	A0A286YDV7	---	5	5	18.3414	17.6148	17.9781	0.00773159	1.65475	1.65475	12Mo-KO_1Way up vs WT	1.19082	2.29943	0.726615	A0A286YDV7	AAKESEEEEEEEETEEK	1xPhospho [S5(100)]	1xPhospho [S5(100); T14(0)]	---	0.000174003	0	Nolc1	nucleolar and coiled-body phosphoprotein 1	70769	Nolc1	19|19 C3	protein-coding	+2σ	17.2529	17.9808	17.1587	17.6387	18.0429	18.3369	18.686	18.2197	18.3612	18.1033
2416	109	O55143_VEGDTCSLNEFSITGSTYAPIGEVQK_1xCarbamidomethyl [C6]; 2xDeamidated [N9; Q25]; 1xPhospho [T/S/Y]_1xCarbamidomethyl [C6]; 2xDeamidated [N9; Q25]; 1xPhospho [T5(50); S7(50); S12(0); T14(0); S16(0); T17(0); Y18(0)]	O55143	Atp2a2	5	5	17.8974	19.6765	18.787	0.00780032	0.291364	-3.43213	12Mo-KO_1Way down vs WT	-7.69171	-1.53146	-1.7791	O55143	VEGDTCSLNEFSITGSTYAPIGEVQK	1xCarbamidomethyl [C6]; 2xDeamidated [N9; Q25]; 1xPhospho [T/S/Y]	1xCarbamidomethyl [C6]; 2xDeamidated [N9; Q25]; 1xPhospho [T5(50); S7(50); S12(0); T14(0); S16(0); T17(0); Y18(0)]	NP_001103610	0.000279992	0	Atp2a2	ATPase, Ca++ transporting, cardiac muscle, slow twitch 2	11938	Atp2a2	5 62.38 cM|5 F	protein-coding	-6σ	20.2529	19.6774	19.8213	19.7122	18.9186	16.2897	19.0627	17.7173	18.2086	18.2086
1740	110	P70670_ETPTTPSPEGVTAAPLEIPISSK_2xPhospho [T5(92.7); S7(79.2)]_2xPhospho [T2(0.6); T4(6.8); T5(92.7); S7(79.2); T12(20.8); S21(0); S22(0)]	P70670	Naca	5	5	19.0237	18.3537	18.6887	0.00781478	1.59106	1.59106	12Mo-KO_1Way up vs WT	1.17398	2.15633	0.669992	P70670	ETPTTPSPEGVTAAPLEIPISSK	2xPhospho [T5(92.7); S7(79.2)]	2xPhospho [T2(0.6); T4(6.8); T5(92.7); S7(79.2); T12(20.8); S21(0); S22(0)]	NP_001106670	0.00296368	0	Naca	nascent polypeptide-associated complex alpha polypeptide	17938	Naca	10|10 D3	protein-coding	+2σ	17.9859	18.6744	18.3256	18.0472	18.7355	18.9643	18.8679	19.1426	19.3867	18.7571
1105	111	A2AM62_LAEGEEEKPEEQENETPPATSSEAEQPK_1xDeamidated [N/Q]; 1xPhospho [T16(100)]_1xDeamidated [Q12; N14; Q26]; 1xPhospho [T16(100); T20(0); S21(0); S22(0)]	A2AM62	---	5	5	16.746	17.5027	17.1243	0.00812189	0.591849	-1.68962	12Mo-KO_1Way down vs WT	-2.38795	-1.19551	-0.7567	A2AM62	LAEGEEEKPEEQENETPPATSSEAEQPK	1xDeamidated [N/Q]; 1xPhospho [T16(100)]	1xDeamidated [Q12; N14; Q26]; 1xPhospho [T16(100); T20(0); S21(0); S22(0)]	---	0.00209421	0	Hp1bp3	heterochromatin protein 1, binding protein 3	15441	Hp1bp3	4|4 D3	protein-coding	-2σ	17.8103	16.9615	17.7961	17.5715	17.374	17.0811	17.1264	16.5535	16.4107	16.5582
1452	112	P14873_GSAESPDEGITTTEGEGECEQTPEELEPVEK_1xCarbamidomethyl [C19]; 1xPhospho [S2(76.6)]_1xCarbamidomethyl [C19]; 1xPhospho [S2(76.6); S5(20.1); T11(0.2); T12(1.6); T13(1.6); T22(0)]	P14873	Map1b	5	5	17.4769	16.4652	16.9711	0.00827782	2.01629	2.01629	12Mo-KO_1Way up vs WT	1.26748	3.20749	1.0117	P14873	GSAESPDEGITTTEGEGECEQTPEELEPVEK	1xCarbamidomethyl [C19]; 1xPhospho [S2(76.6)]	1xCarbamidomethyl [C19]; 1xPhospho [S2(76.6); S5(20.1); T11(0.2); T12(1.6); T13(1.6); T22(0)]	NP_032660	0.0967692	0.00244569	Map1b	microtubule-associated protein 1B	17755	Map1b	13 D1|13 52.9 cM	protein-coding	+2σ	16.1584	16.5805	15.9861	16.1609	17.4399	17.2796	17.2104	17.5109	17.9199	17.4636
865	113	Q8CHU3_GSSQPNLSTSYSEQEYGK_1xPhospho [S3(99.3)]_1xPhospho [S2(0.7); S3(99.3); S8(0); T9(0); S10(0); Y11(0); S12(0); Y16(0)]	Q8CHU3	Epn2	5	5	18.2936	18.6095	18.4516	0.00847943	0.803331	-1.24482	12Mo-KO_1Way down vs WT	-1.44	-1.07609	-0.315934	Q8CHU3	GSSQPNLSTSYSEQEYGK	1xPhospho [S3(99.3)]	1xPhospho [S2(0.7); S3(99.3); S8(0); T9(0); S10(0); Y11(0); S12(0); Y16(0)]	NP_001239118	9.15504e-05	0	Epn2	epsin 2	13855	Epn2	11|11 B2	protein-coding	-1σ	18.7073	18.4555	18.7571	18.6821	18.4455	18.3008	18.5249	18.2228	18.154	18.2654
1448	114	P14873_SPDTSAYCYETMEK_1xCarbamidomethyl [C8]; 1xPhospho [S1(100)]_1xCarbamidomethyl [C8]; 1xPhospho [S1(100); T4(0); S5(0); Y7(0); Y9(0); T11(0)]	P14873	Map1b	5	5	17.8327	16.7369	17.2848	0.00849006	2.13726	2.13726	12Mo-KO_1Way up vs WT	1.28946	3.54247	1.09576	P14873	SPDTSAYCYETMEK	1xCarbamidomethyl [C8]; 1xPhospho [S1(100)]	1xCarbamidomethyl [C8]; 1xPhospho [S1(100); T4(0); S5(0); Y7(0); Y9(0); T11(0)]	NP_032660	0.0660403	0.00104129	Map1b	microtubule-associated protein 1B	17755	Map1b	13 D1|13 52.9 cM	protein-coding	+2σ	16.7434	16.8213	17.553	16.4271	16.1397	17.456	17.4096	17.7457	18.5512	18.0008
1198	115	Q148W8_EESPEPYFFR_1xPhospho [S3(100)]_1xPhospho [S3(100); Y7(0)]	Q148W8	Dusp27	5	5	16.3003	15.4154	15.8578	0.00859266	1.84666	1.84666	12Mo-KO_1Way up vs WT	1.22672	2.7799	0.884921	Q148W8	EESPEPYFFR	1xPhospho [S3(100)]	1xPhospho [S3(100); Y7(0)]	NP_001028516	0.106085	0.00260819	Dusp27	dual specificity phosphatase 27 (putative)	240892	Dusp27	1|1 H2.3	protein-coding	+2σ	15.9	15.8296	14.7574	15.4526	15.1372	16.0731	16.4796	16.6702	16.3833	15.8953
1273	116	E9Q0J5_KLSSSESPAPDTGSSAASGEADTSRPGTQQK_1xPhospho [S/T]_1xPhospho [S3(70.2); S4(13.6); S5(13.6); S7(2.7); T12(0); S14(0); S15(0); S18(0); T23(0); S24(0); T28(0)]	E9Q0J5	---	5	5	17.7846	16.5045	17.1445	0.00881665	2.4285	2.4285	12Mo-KO_1Way up vs WT	1.33989	4.40158	1.28007	E9Q0J5	KLSSSESPAPDTGSSAASGEADTSRPGTQQK	1xPhospho [S/T]	1xPhospho [S3(70.2); S4(13.6); S5(13.6); S7(2.7); T12(0); S14(0); S15(0); S18(0); T23(0); S24(0); T28(0)]	---	0.0116076	0	Kif21a	kinesin family member 21A	16564	Kif21a	15 E3|15 45.86 cM	protein-coding	+3σ	16.6022	15.7772	16.4044	16.7951	16.9436	17.3279	18.0578	16.8952	18.7037	17.9383
1095	117	P51859_AGDVLEDSPKRPK_1xPhospho [S8(100)]_1xPhospho [S8(100)]	P51859	Hdgf	5	5	19.1235	18.3926	18.7581	0.0088547	1.65972	1.65972	12Mo-KO_1Way up vs WT	1.1815	2.33151	0.73094	P51859	AGDVLEDSPKRPK	1xPhospho [S8(100)]	1xPhospho [S8(100)]	NP_032257	0.0018418	0	Hdgf	heparin binding growth factor	15191	Hdgf	3 F1|3 38.78 cM	protein-coding	+2σ	17.6902	18.159	18.5807	18.7299	18.8031	19.2801	19.1223	19.0904	19.0097	19.115
721	118	E9Q557_GLPSPYNMSAPGSR_1xPhospho [S13(100)]_1xPhospho [S4(0); Y6(0); S9(0); S13(100)]	E9Q557	Dsp	5	5	18.272	18.4981	18.385	0.00895596	0.854942	-1.16967	12Mo-KO_1Way down vs WT	-1.29964	-1.0527	-0.226102	E9Q557	GLPSPYNMSAPGSR	1xPhospho [S13(100)]	1xPhospho [S4(0); Y6(0); S9(0); S13(100)]	NP_076331	0.0145158	0	Dsp	desmoplakin	109620	Dsp	13|13 A3.3	protein-coding	-0.5σ	18.653	18.4601	18.4083	18.5405	18.4287	18.3087	18.3566	18.2682	18.088	18.3385
2891	119	O70439_VSGGFPEDSSK_1xPhospho [S2(100)]_1xPhospho [S2(100); S9(0); S10(0)]	O70439	---	5	5	18.0644	17.4014	17.7329	0.00906538	1.58344	1.58344	12Mo-KO_1Way up vs WT	1.16167	2.15835	0.663063	O70439	VSGGFPEDSSK	1xPhospho [S2(100)]	1xPhospho [S2(100); S9(0); S10(0)]	---	0.0325869	0.00049971	Stx7	syntaxin 7	53331	Stx7	10|10 A4	protein-coding	+2σ	17.4887	17.2517	18.0253	17.1489	17.0923	17.6999	18.0999	18.1992	18.1355	18.1876
287	120	E9QM77_QSSIGNSPSGPVLASPQAGIIPAEAVSMPVPAASPTPASPASNR_1xDeamidated [Q/N]; 1xPhospho [T36(89.9)]_1xDeamidated [Q1; N6; Q17; N43]; 1xPhospho [S2(0); S3(0); S7(0); S9(0); S15(0); S27(0); S34(7.3); T36(89.9); S39(2.2); S42(0.7)]	E9QM77	Atxn2	5	5	17.2401	17.5999	17.42	0.00912914	0.779255	-1.28328	12Mo-KO_1Way down vs WT	-1.51853	-1.08447	-0.359833	E9QM77	QSSIGNSPSGPVLASPQAGIIPAEAVSMPVPAASPTPASPASNR	1xDeamidated [Q/N]; 1xPhospho [T36(89.9)]	1xDeamidated [Q1; N6; Q17; N43]; 1xPhospho [S2(0); S3(0); S7(0); S9(0); S15(0); S27(0); S34(7.3); T36(89.9); S39(2.2); S42(0.7)]	NP_033151	0.00185058	0	Atxn2	ataxin 2	20239	Atxn2	5|5 F	protein-coding	-1σ	17.525	17.3988	17.923	17.7053	17.4474	17.2605	17.2902	17.098	17.2004	17.3511
822	121	Q69ZW3_TSGSDDPGLSSSTDSAQALASLGK_1xPhospho [T/S]_1xPhospho [T1(33.3); S2(33.3); S4(33.3); S10(0); S11(0); S12(0); T13(0); S15(0); S21(0)]	Q69ZW3	Ehbp1	5	5	16.193	16.9742	16.5836	0.00913654	0.581866	-1.71861	12Mo-KO_1Way down vs WT	-2.47695	-1.19244	-0.781241	Q69ZW3	TSGSDDPGLSSSTDSAQALASLGK	1xPhospho [T/S]	1xPhospho [T1(33.3); S2(33.3); S4(33.3); S10(0); S11(0); S12(0); T13(0); S15(0); S21(0)]	NP_001239444	0.0121731	0	Ehbp1	EH domain binding protein 1	216565	Ehbp1	11 A3.2|11 14.1 cM	protein-coding	-2σ	16.6839	17.0891	17.1135	17.402	16.5825	15.6003	16.3473	16.0269	16.4349	16.5553
389	122	Q6PHZ2_KPDGVKESTESSNTTIEDEDVK_1xPhospho [T9(98.5)]_1xPhospho [S8(1.5); T9(98.5); S11(0); S12(0); T14(0); T15(0)]	Q6PHZ2	Camk2d	5	5	16.1315	14.7694	15.4505	0.00926076	2.57065	2.57065	12Mo-KO_1Way up vs WT	1.35684	4.87032	1.36213	Q6PHZ2	KPDGVKESTESSNTTIEDEDVK	1xPhospho [T9(98.5)]	1xPhospho [S8(1.5); T9(98.5); S11(0); S12(0); T14(0); T15(0)]	NP_001020609	0.00450433	0	Camk2d	calcium/calmodulin-dependent protein kinase II, delta	108058	Camk2d	3|3 G1- G2	protein-coding	+3σ	14.7286	13.9248	15.1131	15.5279	14.5525	16.0882	16.9389	15.1807	15.9369	16.5128
2088	123	A0A087WR45_RTPSPPPLPQWTQGVAR_2xPhospho [T2(100); S4(100)]_2xPhospho [T2(100); S4(100); T12(0)]	A0A087WR45	Prob1	5	5	21.1483	21.5376	21.3429	0.00945658	0.763482	-1.30979	12Mo-KO_1Way down vs WT	-1.57345	-1.09031	-0.389335	A0A087WR45	RTPSPPPLPQWTQGVAR	2xPhospho [T2(100); S4(100)]	2xPhospho [T2(100); S4(100); T12(0)]	NP_001257575	0.000192283	0	Prob1	proline rich basic protein 1	381148	Prob1	18|18 B2	protein-coding	-1σ	21.7542	21.667	21.4341	21.4165	21.4165	21.1208	21.2015	21.1379	21.4198	20.8616
3243	124	Q922Y1_SSPPATDPGPVPSSPSQEPPTK_1xDeamidated [Q17]; 1xPhospho [S/T]_1xDeamidated [Q17]; 1xPhospho [S1(50); S2(50); T6(0); S13(0); S14(0); S16(0); T21(0)]	Q922Y1	Ubxn1	5	5	17.0612	17.5672	17.3142	0.0095173	0.704192	-1.42007	12Mo-KO_1Way down vs WT	-1.80282	-1.11857	-0.505959	Q922Y1	SSPPATDPGPVPSSPSQEPPTK	1xDeamidated [Q17]; 1xPhospho [S/T]	1xDeamidated [Q17]; 1xPhospho [S1(50); S2(50); T6(0); S13(0); S14(0); S16(0); T21(0)]	NP_666205	0.00274648	0	Ubxn1	UBX domain protein 1	225896	Ubxn1	19|19 A	protein-coding	-1σ	17.8084	17.5699	17.7372	17.3602	17.3602	17.3019	16.761	17.348	16.8556	17.0396
1602	125	Q9QVP4_GSSNVFSMFEQAQIQEFK_1xOxidation [M8]; 1xPhospho [S3(92.1)]_1xOxidation [M8]; 1xPhospho [S2(7.9); S3(92.1); S7(0)]	Q9QVP4	Myl7	5	5	22.7718	23.49	23.1309	0.00965198	0.607832	-1.64519	12Mo-KO_1Way down vs WT	-2.3108	-1.17131	-0.718257	Q9QVP4	GSSNVFSMFEQAQIQEFK	1xOxidation [M8]; 1xPhospho [S3(92.1)]	1xOxidation [M8]; 1xPhospho [S2(7.9); S3(92.1); S7(0)]	NP_075017	2.13548e-05	0	Myl7	myosin, light polypeptide 7, regulatory	17898	Myl7	11 A1|11 3.88 cM	protein-coding	-2σ	23.9232	23.5934	23.5313	23.2743	23.1278	23.243	22.9177	22.8428	22.57	22.2853
3040	126	A2ASS6_RSLGDMSDEELLLPIDDYLAMK_2xPhospho [S2(100); S7(100)]_2xPhospho [S2(100); S7(100); Y18(0)]	A2ASS6	---	5	5	17.0606	15.8349	16.4477	0.0098236	2.33873	2.33873	12Mo-KO_1Way up vs WT	1.30708	4.18466	1.22573	A2ASS6	RSLGDMSDEELLLPIDDYLAMK	2xPhospho [S2(100); S7(100)]	2xPhospho [S2(100); S7(100); Y18(0)]	---	0.00306403	0	Ttn	titin	22138	Ttn	2 C3|2 45.13 cM	protein-coding	+3σ	14.7796	16.4751	16.0623	15.8081	16.0492	16.3657	16.7735	17.2365	17.6947	17.2326
3273	127	P54726_AVEYLLTGIPGSPEPEHGSVQESQAPEQPATEAAGENPLEFLR_1xDeamidated [Q/N]; 1xPhospho [S/T/Y]_1xDeamidated [Q21; Q24; Q28; N37]; 1xPhospho [Y4(0); T7(11.9); S12(41.8); S19(1.1); S23(3.5); T31(41.8)]	P54726	Rad23a	5	5	17.7669	18.2314	17.9992	0.00985772	0.724728	-1.37983	12Mo-KO_1Way down vs WT	-1.72046	-1.10664	-0.464488	P54726	AVEYLLTGIPGSPEPEHGSVQESQAPEQPATEAAGENPLEFLR	1xDeamidated [Q/N]; 1xPhospho [S/T/Y]	1xDeamidated [Q21; Q24; Q28; N37]; 1xPhospho [Y4(0); T7(11.9); S12(41.8); S19(1.1); S23(3.5); T31(41.8)]	NP_001284535	0.000774905	0	Rad23a	RAD23 homolog A, nucleotide excision repair protein	19358	Rad23a	8|8 C3	protein-coding	-1σ	18.3395	17.8886	18.3101	18.4287	18.19	17.8482	17.4749	17.6674	17.756	18.088
1620	128	E9PV66_VKSPLGAEGIPGATAGLSR_1xPhospho [S3(100)]_1xPhospho [S3(100); T14(0); S18(0)]	E9PV66	Myo18b	5	5	15.328	14.551	14.9395	0.00995467	1.7135	1.7135	12Mo-KO_1Way up vs WT	1.18384	2.48013	0.776945	E9PV66	VKSPLGAEGIPGATAGLSR	1xPhospho [S3(100)]	1xPhospho [S3(100); T14(0); S18(0)]	NP_083177	0.109039	0.00295964	Myo18b	myosin XVIIIb	74376	Myo18b	5|5 F	protein-coding	+2σ	14.1162	14.087	15.0871	14.7981	14.6668	15.1019	15.1886	15.21	15.3428	15.7965
1992	129	A2CEK3_AIGGIILTASHNPGGPNGDFGIK_2xDeamidated [N12; N17]; 1xPhospho [S10(98.4)]_2xDeamidated [N12; N17]; 1xPhospho [T8(1.6); S10(98.4)]	A2CEK3	---	5	5	20.4463	19.89	20.1682	0.00999133	1.47045	1.47045	12Mo-KO_1Way up vs WT	1.12821	1.9165	0.556254	A2CEK3	AIGGIILTASHNPGGPNGDFGIK	2xDeamidated [N12; N17]; 1xPhospho [S10(98.4)]	2xDeamidated [N12; N17]; 1xPhospho [T8(1.6); S10(98.4)]	---	5.37378e-05	0	Pgm2	phosphoglucomutase 2	66681	Pgm2	5 C3.1|5 32.8 cM	protein-coding	+1σ	20.1001	19.8098	19.8029	19.7772	19.9601	20.3206	20.3036	20.2209	20.3292	21.057
578	130	A2AMM0_SLPENQEEAEEVFDPPIELSSDEEYYVEESR_1xPhospho [S21(77.4)]_1xPhospho [S1(0); S20(21.9); S21(77.4); Y25(0); Y26(0); S30(0.7)]	A2AMM0	Cavin4	5	5	16.9299	16.0344	16.4822	0.0101274	1.86032	1.86032	12Mo-KO_1Way up vs WT	1.21294	2.85321	0.895548	A2AMM0	SLPENQEEAEEVFDPPIELSSDEEYYVEESR	1xPhospho [S21(77.4)]	1xPhospho [S1(0); S20(21.9); S21(77.4); Y25(0); Y26(0); S30(0.7)]	NP_080785	0.0137758	0	Cavin4	caveolae associated 4	68016	Cavin4	4|4 B1	protein-coding	+2σ	16.212	15.3984	16.1584	16.0412	16.3619	17.0893	16.8293	17.4242	17.1227	16.1841
950	131	Q6P5B5_DPDSNPYSLLDTSEPEPPVDSEPGEPPPASAR_1xPhospho [S21(99.9)]_1xPhospho [S4(0); Y7(0); S8(0); T12(0); S13(0.1); S21(99.9); S30(0)]	Q6P5B5	Fxr2	5	5	18.2469	17.6102	17.9286	0.0103111	1.5548	1.5548	12Mo-KO_1Way up vs WT	1.14586	2.10969	0.63673	Q6P5B5	DPDSNPYSLLDTSEPEPPVDSEPGEPPPASAR	1xPhospho [S21(99.9)]	1xPhospho [S4(0); Y7(0); S8(0); T12(0); S13(0.1); S21(99.9); S30(0)]	NP_035944	0.000906615	0	Fxr2	fragile X mental retardation, autosomal homolog 2	23879	Fxr2	11 B3|11 42.86 cM	protein-coding	+2σ	17.9784	17.6305	17.2903	17.7287	17.4231	17.8362	18.2768	18.1527	18.7588	18.2103
242	132	Q3UHJ0_EQGSSGLGSGSSGGGGSSSGLGSGYIGR_1xPhospho [S/Y]_1xPhospho [S4(45.1); S5(45.1); S9(1.2); S11(7.3); S12(1.2); S17(0); S18(0); S19(0); S23(0); Y25(0)]	Q3UHJ0	Aak1	5	5	16.3008	15.1204	15.7106	0.0103267	2.26635	2.26635	12Mo-KO_1Way up vs WT	1.28689	3.99128	1.18037	Q3UHJ0	EQGSSGLGSGSSGGGGSSSGLGSGYIGR	1xPhospho [S/Y]	1xPhospho [S4(45.1); S5(45.1); S9(1.2); S11(7.3); S12(1.2); S17(0); S18(0); S19(0); S23(0); Y25(0)]	NP_001035195	0.000982977	0	Aak1	AP2 associated kinase 1	269774	Aak1	6 D1|6 37.75 cM	protein-coding	+3σ	15.7065	15.1513	14.6568	15.2493	14.8381	15.2179	16.3449	16.2897	17.0764	16.5749
201	133	E9Q8N8_NLTSSSLNDISDKPEK_1xPhospho [S6(97.5)]_1xPhospho [T3(0.3); S4(1.8); S5(0.3); S6(97.5); S11(0.3)]	E9Q8N8	Slc4a4	5	5	16.4113	15.4294	15.9203	0.0103793	1.97508	1.97508	12Mo-KO_1Way up vs WT	1.23286	3.16414	0.981911	E9Q8N8	NLTSSSLNDISDKPEK	1xPhospho [S6(97.5)]	1xPhospho [T3(0.3); S4(1.8); S5(0.3); S6(97.5); S11(0.3)]	NP_001129732	0.115175	0.00309639	Slc4a4	solute carrier family 4 (anion exchanger), member 4	54403	Slc4a4	5|5 E1	protein-coding	+2σ	15.0722	15.3678	15.7208	15.7879	15.1982	15.9556	15.9804	16.0882	17.2516	16.7807
930	134	Q61554_GGPEPPASSEMDDNSLSPEACYECK_2xCarbamidomethyl [C21; C24]; 1xDeamidated [N14]; 1xOxidation [M11]; 1xPhospho [S8(96.9)]_2xCarbamidomethyl [C21; C24]; 1xDeamidated [N14]; 1xOxidation [M11]; 1xPhospho [S8(96.9); S9(1.6); S15(1.6); S17(0); Y22(0)]	Q61554	Fbn1	5	5	20.3298	21.819	21.0744	0.0104624	0.356208	-2.80735	12Mo-KO_1Way down vs WT	-5.74392	-1.3721	-1.48921	Q61554	GGPEPPASSEMDDNSLSPEACYECK	2xCarbamidomethyl [C21; C24]; 1xDeamidated [N14]; 1xOxidation [M11]; 1xPhospho [S8(96.9)]	2xCarbamidomethyl [C21; C24]; 1xDeamidated [N14]; 1xOxidation [M11]; 1xPhospho [S8(96.9); S9(1.6); S15(1.6); S17(0); Y22(0)]	NP_032019	6.68823e-05	0	Fbn1	fibrillin 1	14118	Fbn1	2 F1|2 61.38 cM	protein-coding	-3σ	22.5019	22.6627	20.1953	21.9717	21.7635	20.2164	20.0649	20.2918	20.541	20.535
1370	135	Q9QXD8_ESSPSWSTDSSLEPVLPGSPTPSR_1xPhospho [S23(99.8)]_1xPhospho [S2(0); S3(0); S5(0); S7(0); T8(0); S10(0); S11(0); S19(0); T21(0.2); S23(99.8)]	Q9QXD8	Limd1	5	5	16.2618	17.4603	16.861	0.0107635	0.435721	-2.29505	12Mo-KO_1Way down vs WT	-4.09692	-1.28566	-1.19852	Q9QXD8	ESSPSWSTDSSLEPVLPGSPTPSR	1xPhospho [S23(99.8)]	1xPhospho [S2(0); S3(0); S5(0); S7(0); T8(0); S10(0); S11(0); S19(0); T21(0.2); S23(99.8)]	NP_038888	0.126113	0.00337228	Limd1	LIM domains containing 1	29806	Limd1	9 F4|9 74.0 cM	protein-coding	-3σ	18.07	18.1269	16.9581	17.7398	16.4067	16.3	16.0085	16.0936	16.1333	16.7735
1410	136	Q80UU9_LLKPGEEPSEYTDEEDTK_1xPhospho [T12(100)]_1xPhospho [S9(0); Y11(0); T12(100); T17(0)]	Q80UU9	Pgrmc2	5	5	18.3262	17.017	17.6716	0.0107737	2.47798	2.47798	12Mo-KO_1Way up vs WT	1.31567	4.66711	1.30916	Q80UU9	LLKPGEEPSEYTDEEDTK	1xPhospho [T12(100)]	1xPhospho [S9(0); Y11(0); T12(100); T17(0)]	NP_081834	0.00419413	0	Pgrmc2	progesterone receptor membrane component 2	70804	Pgrmc2	3|3 B	protein-coding	+3σ	15.7879	17.1627	17.763	16.5613	17.8103	18.3385	18.4089	17.9542	18.3451	18.5843
1744	137	P05125_MPVEDEVMPPQALSEQTEEAGAALSSLPEVPPWTGEVNPPLR_2xDeamidated [Q11; Q16]; 1xOxidation [M]; 1xPhospho [T/S]_2xDeamidated [Q11; Q16]; 1xOxidation [M1; M8]; 1xPhospho [S14(16.3); T17(51.2); S25(16.3); S26(16.3); T34(0.1)]	P05125	Nppa	5	5	15.4633	16.0001	15.7317	0.0109128	0.689304	-1.45074	12Mo-KO_1Way down vs WT	-1.882	-1.1183	-0.536787	P05125	MPVEDEVMPPQALSEQTEEAGAALSSLPEVPPWTGEVNPPLR	2xDeamidated [Q11; Q16]; 1xOxidation [M]; 1xPhospho [T/S]	2xDeamidated [Q11; Q16]; 1xOxidation [M1; M8]; 1xPhospho [S14(16.3); T17(51.2); S25(16.3); S26(16.3); T34(0.1)]	NP_032751	0.00135194	0	Nppa	natriuretic peptide type A	230899	Nppa	4 E1|4 78.66 cM	protein-coding	-1σ	16.0214	15.6825	16.5259	15.8763	15.8945	15.447	15.5778	15.6969	15.2586	15.3364
2294	138	Q9CSU0_TFQQIQEEEDDDYPGSYSPQDPSAGPLLTEELIK_2xDeamidated [Q]; 1xPhospho [S23(88)]_2xDeamidated [Q3; Q4; Q6; Q20]; 1xPhospho [T1(0.2); Y13(0.1); S16(1.4); Y17(0.2); S18(9.8); S23(88); T29(0.2)]	Q9CSU0	Rprd1b	5	5	19.3545	19.6873	19.5209	0.0109155	0.794	-1.25945	12Mo-KO_1Way down vs WT	-1.47999	-1.07177	-0.332788	Q9CSU0	TFQQIQEEEDDDYPGSYSPQDPSAGPLLTEELIK	2xDeamidated [Q]; 1xPhospho [S23(88)]	2xDeamidated [Q3; Q4; Q6; Q20]; 1xPhospho [T1(0.2); Y13(0.1); S16(1.4); Y17(0.2); S18(9.8); S23(88); T29(0.2)]	NP_001278063	0.000836186	0	Rprd1b	regulation of nuclear pre-mRNA domain containing 1B	70470	Rprd1b	2|2 H1	protein-coding	-1σ	19.5049	19.6274	19.9145	19.5798	19.8098	19.5575	19.4313	19.282	19.3372	19.1646
168	139	P29699_VMHTQCHSTPDSAEDVRK_1xCarbamidomethyl [C6]; 1xPhospho [S12(100)]_1xCarbamidomethyl [C6]; 1xPhospho [T4(0); S8(0); T9(0); S12(100)]	P29699	Ahsg	5	5	22.4676	21.7437	22.1057	0.0109305	1.65164	1.65164	12Mo-KO_1Way up vs WT	1.16261	2.34636	0.723896	P29699	VMHTQCHSTPDSAEDVRK	1xCarbamidomethyl [C6]; 1xPhospho [S12(100)]	1xCarbamidomethyl [C6]; 1xPhospho [T4(0); S8(0); T9(0); S12(100)]	NP_038493	0.000185103	0	Ahsg	alpha-2-HS-glycoprotein	11625	Ahsg	16 B1|16 13.74 cM	protein-coding	+2σ	21.5411	21.3312	21.7635	22.5194	21.5634	22.4288	22.6799	22.2392	22.398	22.5924
2001	140	Q9Z239_TGEPDEEEGTFRSSIR_1xPhospho [T/S]_1xPhospho [T1(0); T10(48); S13(48); S14(4.1)]	Q9Z239	Fxyd1	5	5	16.3651	15.3816	15.8734	0.0109668	1.97729	1.97729	12Mo-KO_1Way up vs WT	1.22677	3.18698	0.983527	Q9Z239	TGEPDEEEGTFRSSIR	1xPhospho [T/S]	1xPhospho [T1(0); T10(48); S13(48); S14(4.1)]	NP_062376	0.0728787	0.00144181	Fxyd1	FXYD domain-containing ion transport regulator 1	56188	Fxyd1	7|7 B1	protein-coding	+2σ	15.5754	15.1131	15.4343	15.357	15.428	15.3875	16.085	16.9142	16.5173	16.9215
1900	141	Q9ET54_SRSRDSGDENEPIQER_2xPhospho [S1(99.2); S]_2xPhospho [S1(99.2); S3(50.4); S6(50.4)]	Q9ET54	Palld	5	5	17.2756	16.5328	16.9042	0.0110686	1.67342	1.67342	12Mo-KO_1Way up vs WT	1.16612	2.40141	0.742798	Q9ET54	SRSRDSGDENEPIQER	2xPhospho [S1(99.2); S]	2xPhospho [S1(99.2); S3(50.4); S6(50.4)]	NP_001074859	0.116758	0.00309639	Palld	palladin, cytoskeletal associated protein	72333	Palld	8|8 B3.1	protein-coding	+2σ	16.4438	16.3657	16.1132	16.8566	16.8848	17.4121	17.2129	16.8183	17.8384	17.0963
1983	142	Q6P549_DASDVEDEKPPLPPR_1xPhospho [S3(100)]_1xPhospho [S3(100)]	Q6P549	Inppl1	5	5	18.1034	16.9973	17.5504	0.011212	2.15273	2.15273	12Mo-KO_1Way up vs WT	1.25539	3.69148	1.10617	Q6P549	DASDVEDEKPPLPPR	1xPhospho [S3(100)]	1xPhospho [S3(100)]	NP_001116211	0.0481199	0.000921163	Inppl1	inositol polyphosphate phosphatase-like 1	16332	Inppl1	7|7 E2	protein-coding	+2σ	17.6668	17.1517	17.4579	15.8886	16.8213	18.1813	18.4545	17.8729	17.7493	18.2591
1711	143	P70670_DAPTTLAESPSSPK_1xPhospho [S9(93.2)]_1xPhospho [T4(0); T5(0); S9(93.2); S11(6.3); S12(0.5)]	P70670	Naca	5	5	21.8136	22.0302	21.9219	0.0113867	0.860574	-1.16201	12Mo-KO_1Way down vs WT	-1.29189	-1.0452	-0.216628	P70670	DAPTTLAESPSSPK	1xPhospho [S9(93.2)]	1xPhospho [T4(0); T5(0); S9(93.2); S11(6.3); S12(0.5)]	NP_001106670	0.000249784	0	Naca	nascent polypeptide-associated complex alpha polypeptide	17938	Naca	10|10 D3	protein-coding	-0.5σ	22.0748	21.8659	22.013	22.1228	22.0748	21.8207	21.8982	21.6303	21.8982	21.8207
2535	144	Q80TE4_SEGSPPPEEPEVTECPR_1xCarbamidomethyl [C15]; 1xPhospho [S1(88.6)]_1xCarbamidomethyl [C15]; 1xPhospho [S1(88.6); S4(11.5); T13(0)]	Q80TE4	Sipa1l2	5	5	16.054	16.6609	16.3575	0.0114238	0.656598	-1.523	12Mo-KO_1Way down vs WT	-2.04973	-1.13163	-0.606918	Q80TE4	SEGSPPPEEPEVTECPR	1xCarbamidomethyl [C15]; 1xPhospho [S1(88.6)]	1xCarbamidomethyl [C15]; 1xPhospho [S1(88.6); S4(11.5); T13(0)]	NP_001074806	0.133724	0.00368888	Sipa1l2	signal-induced proliferation-associated 1 like 2	244668	Sipa1l2	8|8 E2	protein-coding	-2σ	16.1609	16.7665	17.0107	16.6072	16.7593	16.2967	16.0912	16.0592	16.2226	15.6003
589	145	Q9DCC5_RKSLSDSESDDSK_2xPhospho [S3(100); S5(99)]_2xPhospho [S3(100); S5(99); S7(1); S9(0); S12(0)]	Q9DCC5	Cbx3	5	5	14.624	15.3921	15.0081	0.01144	0.587166	-1.70309	12Mo-KO_1Way down vs WT	-2.48058	-1.16929	-0.768159	Q9DCC5	RKSLSDSESDDSK	2xPhospho [S3(100); S5(99)]	2xPhospho [S3(100); S5(99); S7(1); S9(0); S12(0)]	NP_031650	0.0230268	0.000280731	Cbx3	chromobox 3	12417	Cbx3	6 B3|6 24.89 cM	protein-coding	-2σ	15.8025	14.949	15.2828	15.4921	15.4343	15.0919	14.2761	14.8215	14.085	14.8454
1064	146	Q9ESX5_TVLESGGETGDGDNDTTK_1xDeamidated [N14]; 1xPhospho [S/T]_1xDeamidated [N14]; 1xPhospho [T1(0); S5(50); T9(50); T16(0); T17(0)]	Q9ESX5	Dkc1	5	5	16.8719	16.3719	16.6219	0.011499	1.41418	1.41418	12Mo-KO_1Way up vs WT	1.10687	1.8068	0.499963	Q9ESX5	TVLESGGETGDGDNDTTK	1xDeamidated [N14]; 1xPhospho [S/T]	1xDeamidated [N14]; 1xPhospho [T1(0); S5(50); T9(50); T16(0); T17(0)]	NP_001025478	0.00992132	0	Dkc1	dyskeratosis congenita 1, dyskerin	245474	Dkc1	X|X A7.3	protein-coding	+1σ	16.4225	16.7726	16.4141	16.1425	16.1079	17.0764	16.5801	17.0893	16.806	16.8077
2443	147	Q52KI8_KETESEAEDDNLDDLER_1xPhospho [T3(99.8)]_1xPhospho [T3(99.8); S5(0.2)]	Q52KI8	Srrm1	5	5	17.9947	19.4418	18.7183	0.0118131	0.366761	-2.72657	12Mo-KO_1Way down vs WT	-5.56301	-1.33636	-1.44709	Q52KI8	KETESEAEDDNLDDLER	1xPhospho [T3(99.8)]	1xPhospho [T3(99.8); S5(0.2)]	NP_058079	0.00068802	0	Srrm1	serine/arginine repetitive matrix 1	51796	Srrm1	4|4 D3	protein-coding	-3σ	19.8904	19.4869	20.3349	19.5545	17.9425	17.8744	17.653	17.6409	18.1479	18.6574
1487	148	G3X9G2_LDSSPVLSPGNK_1xPhospho [S]_1xPhospho [S3(50); S4(50); S8(0)]	G3X9G2	Mink1	5	5	17.7033	17.094	17.3986	0.0118676	1.52551	1.52551	12Mo-KO_1Way up vs WT	1.12952	2.06031	0.609288	G3X9G2	LDSSPVLSPGNK	1xPhospho [S]	1xPhospho [S3(50); S4(50); S8(0)]	NP_001039429	0.118361	0.00324389	Mink1	misshapen-like kinase 1 (zebrafish)	50932	Mink1	11|11 B3	protein-coding	+2σ	17.2022	17.3326	17.1063	16.6576	17.1715	17.3372	18.0682	17.375	17.7889	17.9472
412	149	P51125_EQKPFTPASPVQSTPSKPSDK_1xDeamidated [Q]; 1xPhospho [S9(100)]_1xDeamidated [Q2; Q12]; 1xPhospho [T6(0.1); S9(100); S13(0); T14(0); S16(0); S19(0)]	P51125	Cast	5	5	15.8231	17.9326	16.8778	0.0120065	0.231726	-4.31544	12Mo-KO_1Way down vs WT	-12.2461	-1.52073	-2.10951	P51125	EQKPFTPASPVQSTPSKPSDK	1xDeamidated [Q]; 1xPhospho [S9(100)]	1xDeamidated [Q2; Q12]; 1xPhospho [T6(0.1); S9(100); S13(0); T14(0); S16(0); S19(0)]	NP_001288082	0.000753101	0	Cast	calpastatin	12380	Cast	13|13 C1	protein-coding	-6σ	19.1848	17.1662	19.3455	16.0107	17.9556	15.6906	16.1516	15.2179	16.2452	15.8101
2468	150	Q8BTI8_RQPSPQPSPR_2xPhospho [S4(100); S8(100)]_2xPhospho [S4(100); S8(100)]	Q8BTI8	Srrm2	5	5	16.2353	17.0057	16.6205	0.0122209	0.586257	-1.70574	12Mo-KO_1Way down vs WT	-2.50002	-1.1638	-0.770394	Q8BTI8	RQPSPQPSPR	2xPhospho [S4(100); S8(100)]	2xPhospho [S4(100); S8(100)]	NP_780438	0.0130735	0	Srrm2	serine/arginine repetitive matrix 2	75956	Srrm2	17|17 A3.3	protein-coding	-2σ	17.1653	17.2741	17.5211	16.3956	16.6726	16.1679	16.2628	16.6314	16.2475	15.8671
992	151	P23242_YAYFNGCSSPTAPLSPMSPPGYK_1xCarbamidomethyl [C7]; 1xDeamidated [N5]; 2xPhospho [S15(94.8); T/S/Y]_1xCarbamidomethyl [C7]; 1xDeamidated [N5]; 2xPhospho [Y1(0); Y3(0); S8(15.6); S9(15.6); T11(68.8); S15(94.8); S18(5.2); Y22(0)]	P23242	Gja1	5	5	15.6715	16.732	16.2018	0.0122341	0.479464	-2.08566	12Mo-KO_1Way down vs WT	-3.53062	-1.23207	-1.0605	P23242	YAYFNGCSSPTAPLSPMSPPGYK	1xCarbamidomethyl [C7]; 1xDeamidated [N5]; 2xPhospho [S15(94.8); T/S/Y]	1xCarbamidomethyl [C7]; 1xDeamidated [N5]; 2xPhospho [Y1(0); Y3(0); S8(15.6); S9(15.6); T11(68.8); S15(94.8); S18(5.2); Y22(0)]	NP_034418	0.00155192	0	Gja1	gap junction protein, alpha 1	14609	Gja1	10 B4|10 28.64 cM	protein-coding	-2σ	16.8286	16.813	16.4526	17.0923	16.4734	14.904	15.7793	15.1428	15.8836	16.6477
87	152	E9QK41_NSPLPYRPDSRPLTPTYAQAPK_2xPhospho [S2(97.7); T14(100)]_2xPhospho [S2(97.7); Y6(0); S10(2.3); T14(100); T16(0); Y17(0)]	E9QK41	Ablim1	5	5	17.5974	16.7156	17.1565	0.0122584	1.84259	1.84259	12Mo-KO_1Way up vs WT	1.18927	2.85481	0.881736	E9QK41	NSPLPYRPDSRPLTPTYAQAPK	2xPhospho [S2(97.7); T14(100)]	2xPhospho [S2(97.7); Y6(0); S10(2.3); T14(100); T16(0); Y17(0)]	NP_848803	0.222124	0.00972633	Ablim1	actin-binding LIM protein 1	226251	Ablim1	19 D2|19 52.09 cM	protein-coding	+2σ	16.9103	16.6083	16.4545	17.0408	16.5644	16.8629	17.5507	17.8291	18.3761	17.3681
1241	153	Q9ET80_QSHSPQPSSPEPSKK_2xPhospho [S4(98.1); S]_2xPhospho [S2(1.9); S4(98.1); S8(50); S9(50); S13(0)]	Q9ET80	Jph1	5	5	14.6852	15.6631	15.1741	0.0123078	0.507729	-1.96955	12Mo-KO_1Way down vs WT	-3.20201	-1.21147	-0.977868	Q9ET80	QSHSPQPSSPEPSKK	2xPhospho [S4(98.1); S]	2xPhospho [S2(1.9); S4(98.1); S8(50); S9(50); S13(0)]	NP_065629	0.082668	0.00198899	Jph1	junctophilin 1	57339	Jph1	1|1 A3	protein-coding	-2σ	15.2493	16.245	15.428	15.6074	15.7858	15.2892	14.5511	15.2299	14.367	13.9889
1581	154	Q3UIZ8_RSSNNGGMSAEEEIGSGAEPMR_2xDeamidated [N4; N5]; 1xPhospho [S3(98.2)]_2xDeamidated [N4; N5]; 1xPhospho [S2(1.8); S3(98.2); S9(0); S16(0)]	Q3UIZ8	Mylk3	5	5	18.6733	19.5518	19.1125	0.0124605	0.543935	-1.83845	12Mo-KO_1Way down vs WT	-2.84803	-1.18675	-0.878493	Q3UIZ8	RSSNNGGMSAEEEIGSGAEPMR	2xDeamidated [N4; N5]; 1xPhospho [S3(98.2)]	2xDeamidated [N4; N5]; 1xPhospho [S2(1.8); S3(98.2); S9(0); S16(0)]	NP_001284541	0.000324481	0	Mylk3	myosin light chain kinase 3	213435	Mylk3	8|8 C3	protein-coding	-2σ	19.7044	19.2293	19.1795	20.4432	19.2026	18.7255	18.8756	18.891	18.1976	18.6769
449	155	P61014_RASTIEMPQQAR_1xOxidation [M7]; 1xPhospho [S3(99.6)]_1xOxidation [M7]; 1xPhospho [S3(99.6); T4(0.4)]	P61014	Pln	5	5	22.7444	22.0951	22.4198	0.0125061	1.56838	1.56838	12Mo-KO_1Way up vs WT	1.13462	2.16796	0.649276	P61014	RASTIEMPQQAR	1xOxidation [M7]; 1xPhospho [S3(99.6)]	1xOxidation [M7]; 1xPhospho [S3(99.6); T4(0.4)]	NP_001135399	0.000659186	0	Pln	phospholamban	18821	Pln	10|10 B3	protein-coding	+2σ	21.7897	22.2986	21.6975	22.6768	22.013	22.7212	23.004	22.5223	22.5568	22.9177
1275	156	Q8BX02_VLSPAECPQLRPPGAAVATTSLEGPQLSQESQR_1xCarbamidomethyl [C7]; 1xDeamidated [Q]; 1xPhospho [S3(100)]_1xCarbamidomethyl [C7]; 1xDeamidated [Q9; Q26; Q29; Q32]; 1xPhospho [S3(100); T19(0); T20(0); S21(0); S28(0); S31(0)]	Q8BX02	Kank2	5	5	16.2521	17.3036	16.7779	0.0125563	0.48246	-2.07271	12Mo-KO_1Way down vs WT	-3.50295	-1.22643	-1.05152	Q8BX02	VLSPAECPQLRPPGAAVATTSLEGPQLSQESQR	1xCarbamidomethyl [C7]; 1xDeamidated [Q]; 1xPhospho [S3(100)]	1xCarbamidomethyl [C7]; 1xDeamidated [Q9; Q26; Q29; Q32]; 1xPhospho [S3(100); T19(0); T20(0); S21(0); S28(0); S31(0)]	NP_663586	0.0156637	0	Kank2	KN motif and ankyrin repeat domains 2	235041	Kank2	9|9 A3	protein-coding	-2σ	17.6148	17.2799	16.3111	17.7274	17.585	16.9215	16.1909	15.9556	15.7602	16.4324
3008	157	B9EHJ3_IDSPGLKPASQQVYR_1xPhospho [S3(100)]_1xPhospho [S3(100); S10(0); Y14(0)]	B9EHJ3	Tjp1	5	5	17.2408	16.2025	16.7217	0.0131055	2.05373	2.05373	12Mo-KO_1Way up vs WT	1.21761	3.46402	1.03825	B9EHJ3	IDSPGLKPASQQVYR	1xPhospho [S3(100)]	1xPhospho [S3(100); S10(0); Y14(0)]	NP_001157046	0.180712	0.00681976	Tjp1	tight junction protein 1	21872	Tjp1	7 C|7 35.02 cM	protein-coding	+2σ	17.1676	15.8791	15.7614	16.4643	15.7403	16.7735	17.3263	16.9027	17.7184	17.4831
65	158	A2AQN4_AELGMNDSPSQSPPVK_1xPhospho [S12(99.9)]_1xPhospho [S8(0); S10(0.1); S12(99.9)]	A2AQN4	---	5	5	19.4266	19.6678	19.5472	0.0135522	0.846045	-1.18197	12Mo-KO_1Way down vs WT	-1.33574	-1.0459	-0.241194	A2AQN4	AELGMNDSPSQSPPVK	1xPhospho [S12(99.9)]	1xPhospho [S8(0); S10(0.1); S12(99.9)]	---	0.000172355	0	Acss2	acyl-CoA synthetase short-chain family member 2	60525	Acss2	2|2 H1	protein-coding	-0.5σ	19.852	19.6048	19.7326	19.4961	19.6534	19.4721	19.4004	19.5883	19.3349	19.3372
3124	159	Q8CCT4_GTDDSPKNSQEDLQDR_1xPhospho [S5(100)]_1xPhospho [T2(0); S5(100); S9(0)]	Q8CCT4	Tceal5	5	5	16.0634	17.1403	16.6018	0.0137606	0.474048	-2.10949	12Mo-KO_1Way down vs WT	-3.64829	-1.21973	-1.07689	Q8CCT4	GTDDSPKNSQEDLQDR	1xPhospho [S5(100)]	1xPhospho [T2(0); S5(100); S9(0)]	NP_808587	0.0108598	0	Tceal5	transcription elongation factor A (SII)-like 5	331532	Tceal5	X|X F1	protein-coding	-2σ	18.2429	16.5234	17.0891	16.8387	17.0072	15.7517	16.3041	16.4655	16.2652	15.5303
2690	160	Q6PFF0_IEIIQPLLDMAAGTSNAAPVAENVTNNEGSPPPPVK_2xDeamidated [N/Q]; 1xPhospho [S30(92)]_2xDeamidated [Q5; N16; N23; N26; N27]; 1xPhospho [T14(0.3); S15(0.3); T25(7.5); S30(92)]	Q6PFF0	Scaf4	5	5	17.5123	16.801	17.1566	0.0138226	1.63731	1.63731	12Mo-KO_1Way up vs WT	1.13981	2.35195	0.711325	Q6PFF0	IEIIQPLLDMAAGTSNAAPVAENVTNNEGSPPPPVK	2xDeamidated [N/Q]; 1xPhospho [S30(92)]	2xDeamidated [Q5; N16; N23; N26; N27]; 1xPhospho [T14(0.3); S15(0.3); T25(7.5); S30(92)]	NP_849254	0.001241	0	Scaf4	SR-related CTD-associated factor 4	224432	Scaf4	16|16 C3.3	protein-coding	+2σ	16.8267	17.4231	16.7647	16.5727	16.4178	17.2738	17.9948	17.2671	17.3019	17.7242
1892	161	Q60520_SPPVQPHTPVTISLGTAPSLQNNQPVEFNHAINYVNK_1xPhospho [S1(99.3)]_1xPhospho [S1(99.3); T8(0.6); T11(0.1); S13(0.1); T16(0); S19(0); Y34(0)]	Q60520	Sin3a	5	5	17.2111	16.3584	16.7847	0.0139234	1.80588	1.80588	12Mo-KO_1Way up vs WT	1.16906	2.78959	0.852704	Q60520	SPPVQPHTPVTISLGTAPSLQNNQPVEFNHAINYVNK	1xPhospho [S1(99.3)]	1xPhospho [S1(99.3); T8(0.6); T11(0.1); S13(0.1); T16(0); S19(0); Y34(0)]	NP_001103820	0.074604	0.00144181	Sin3a	transcriptional regulator, SIN3A (yeast)	20466	Sin3a	9 B|9 30.89 cM	protein-coding	+2σ	16.6447	16.5176	15.9273	16.48	16.2224	17.3292	16.294	17.7163	17.3441	17.3719
2786	162	A0A1B0GS91_QIPSSPLQQPASPNHPGDSPLPTEAR_1xDeamidated [N/Q]; 1xPhospho [S12(99.9)]_1xDeamidated [Q1; Q8; Q9; N14]; 1xPhospho [S4(0); S5(0); S12(99.9); S19(0.1); T23(0)]	A0A1B0GS91	---	5	5	17.8068	18.3844	18.0956	0.0139876	0.670079	-1.49236	12Mo-KO_1Way down vs WT	-2.00411	-1.11129	-0.577597	A0A1B0GS91	QIPSSPLQQPASPNHPGDSPLPTEAR	1xDeamidated [N/Q]; 1xPhospho [S12(99.9)]	1xDeamidated [Q1; Q8; Q9; N14]; 1xPhospho [S4(0); S5(0); S12(99.9); S19(0.1); T23(0)]	---	0.0142422	0	Svil	supervillin	225115	Svil	18|18 A1	protein-coding	-2σ	18.4945	18.5959	18.3442	18.4368	18.0507	18.2476	17.6543	17.3719	17.6674	18.0928
2177	163	Q60829_AVQHLQTISNLSENQASEEEDELGELR_1xDeamidated [Q/N]; 1xPhospho [T7(87.9)]_1xDeamidated [Q3; Q6; N10; N14; Q15]; 1xPhospho [T7(87.9); S9(12); S12(0); S17(0)]	Q60829	Ppp1r1b	5	5	19.6349	19.9327	19.7838	0.0144424	0.813514	-1.22924	12Mo-KO_1Way down vs WT	-1.4325	-1.05481	-0.297761	Q60829	AVQHLQTISNLSENQASEEEDELGELR	1xDeamidated [Q/N]; 1xPhospho [T7(87.9)]	1xDeamidated [Q3; Q6; N10; N14; Q15]; 1xPhospho [T7(87.9); S9(12); S12(0); S17(0)]	NP_001300899	0.000377831	0	Ppp1r1b	protein phosphatase 1, regulatory inhibitor subunit 1B	19049	Ppp1r1b	11|11 D	protein-coding	-1σ	20.0052	20.0052	19.8933	19.9531	19.8065	19.9707	19.4877	19.4972	19.5994	19.6195
1018	164	Q9Z1E4_SNSVDTGPSSSLSTPTEPLSPTSSLGEERN_1xDeamidated [N]; 1xPhospho [S20(92)]_1xDeamidated [N2; N30]; 1xPhospho [S1(0); S3(0); T6(0); S9(0); S10(0); S11(0); S13(0); T14(0); T16(0); S20(92); T22(3.6); S23(3.6); S24(0.8)]	Q9Z1E4	Gys1	5	5	18.0833	19.4	18.7416	0.0146859	0.40146	-2.49091	12Mo-KO_1Way down vs WT	-4.91229	-1.26308	-1.31667	Q9Z1E4	SNSVDTGPSSSLSTPTEPLSPTSSLGEERN	1xDeamidated [N]; 1xPhospho [S20(92)]	1xDeamidated [N2; N30]; 1xPhospho [S1(0); S3(0); T6(0); S9(0); S10(0); S11(0); S13(0); T14(0); T16(0); S20(92); T22(3.6); S23(3.6); S24(0.8)]	NP_109603	0.00143136	0	Gys1	glycogen synthase 1, muscle	14936	Gys1	7 B3|7 29.31 cM	protein-coding	-3σ	19.8933	20.0484	19.3361	17.8446	19.8776	18.0696	17.6868	18.4057	18.0057	18.2487
1693	165	Q9JJW5_VDGSNLEGGSQQGPSTPPNTPDPR_2xDeamidated [N/Q]; 1xPhospho [T16(85.3)]_2xDeamidated [N5; Q11; Q12; N19]; 1xPhospho [S4(0); S10(0); S15(14.6); T16(85.3); T20(0)]	Q9JJW5	Myoz2	5	5	18.7295	20.7624	19.746	0.0147351	0.244359	-4.09235	12Mo-KO_1Way down vs WT	-11.6858	-1.43313	-2.03293	Q9JJW5	VDGSNLEGGSQQGPSTPPNTPDPR	2xDeamidated [N/Q]; 1xPhospho [T16(85.3)]	2xDeamidated [N5; Q11; Q12; N19]; 1xPhospho [S4(0); S10(0); S15(14.6); T16(85.3); T20(0)]	NP_067478	0.000358569	0	Myoz2	myozenin 2	59006	Myoz2	3|3 G1	protein-coding	-6σ	21.229	20.6619	20.3712	21.0364	20.5134	19.9984	16.2785	19.1168	19.0343	19.2193
3289	166	B9EHK9_ASSEEDGTNGASEASDEKEAAGK_1xDeamidated [N9]; 1xPhospho [S/T]_1xDeamidated [N9]; 1xPhospho [S2(0); S3(0); T8(1); S12(49.5); S15(49.5)]	B9EHK9	Hacd1	5	5	17.6024	16.8524	17.2274	0.0149639	1.6819	1.6819	12Mo-KO_1Way up vs WT	1.14054	2.48022	0.750093	B9EHK9	ASSEEDGTNGASEASDEKEAAGK	1xDeamidated [N9]; 1xPhospho [S/T]	1xDeamidated [N9]; 1xPhospho [S2(0); S3(0); T8(1); S12(49.5); S15(49.5)]	NP_038963	0.00797146	0	Hacd1	3-hydroxyacyl-CoA dehydratase 1	30963	Hacd1	2|2 A1- A2	protein-coding	+2σ	16.2999	17.4887	17.1456	16.7795	16.5481	17.179	17.8588	17.7375	17.7262	17.5109
1929	167	Q9Z0P4_ENSAAPSPGRPQSASPAKEEQK_1xPhospho [S]_1xPhospho [S3(0); S7(0); S13(50); S15(50)]	Q9Z0P4	Palm	5	5	16.359	16.9381	16.6486	0.0152038	0.669388	-1.4939	12Mo-KO_1Way down vs WT	-2.01836	-1.10572	-0.579085	Q9Z0P4	ENSAAPSPGRPQSASPAKEEQK	1xPhospho [S]	1xPhospho [S3(0); S7(0); S13(50); S15(50)]	NP_001155219	0.0234691	0.000280731	Palm	paralemmin	18483	Palm	10 C1|10 39.72 cM	protein-coding	-2σ	16.9781	16.6576	16.9384	17.1811	16.935	16.6663	16.6611	16.5324	16.1209	15.8141
1631	168	P13541; Q5SX39; Q02566; B1AR69; Q91Z83; P13542_VGNEYVTK_1xPhospho [Y5(89.6)]_1xPhospho [Y5(89.6); T7(10.4)]	P13541; Q5SX39; Q02566; B1AR69; Q91Z83; P13542	---	5	5	16.3506	16.894	16.6223	0.0152181	0.686144	-1.45742	12Mo-KO_1Way down vs WT	-1.93302	-1.09884	-0.543417	P13541; Q5SX39; Q02566; B1AR69; Q91Z83; P13542	VGNEYVTK	1xPhospho [Y5(89.6)]	1xPhospho [Y5(89.6); T7(10.4)]	---	0.152225	0.00455194	Myh3	myosin, heavy polypeptide 3, skeletal muscle, embryonic	17883	Myh3	11 B3|11 40.59 cM	protein-coding	-1σ	17.0907	17.1389	16.4734	17.1324	16.6346	16.6494	16.5053	16.3679	16.1023	16.128
1756	169	A0A1L1STC6_TLPSEDEEGEEDKEFYLR_1xPhospho [S4(100)]_1xPhospho [T1(0); S4(100); Y16(0)]	A0A1L1STC6	Syne1	5	5	18.8376	18.5829	18.7102	0.0156316	1.19311	1.19311	12Mo-KO_1Way up vs WT	1.04437	1.36304	0.254733	A0A1L1STC6	TLPSEDEEGEEDKEFYLR	1xPhospho [S4(100)]	1xPhospho [T1(0); S4(100); Y16(0)]	NP_001334661	0.00158927	0	Syne1	spectrin repeat containing, nuclear envelope 1	64009	Syne1	10|10 A1	protein-coding	+0.5σ	18.7218	18.6342	18.5388	18.578	18.4418	18.7132	18.8626	19.0543	18.891	18.6671
1794	170	Q9CZ44_RHSGQDVHVVLK_1xPhospho [S3(100)]_1xPhospho [S3(100)]	Q9CZ44	Nsfl1c	5	5	17.6763	18.479	18.0776	0.0158661	0.573288	-1.74433	12Mo-KO_1Way down vs WT	-2.65721	-1.14506	-0.802669	Q9CZ44	RHSGQDVHVVLK	1xPhospho [S3(100)]	1xPhospho [S3(100)]	NP_001278003	0.0102086	0	Nsfl1c	NSFL1 (p97) cofactor (p47)	386649	Nsfl1c	2|2 G3	protein-coding	-2σ	18.3872	18.266	19.2204	18.1282	18.3932	18.1294	17.8291	17.2618	17.2384	17.9229
169	171	P29699_VMHTQCHSTPDSAEDVR_1xCarbamidomethyl [C6]; 1xOxidation [M2]; 1xPhospho [S12(100)]_1xCarbamidomethyl [C6]; 1xOxidation [M2]; 1xPhospho [T4(0); S8(0); T9(0); S12(100)]	P29699	Ahsg	5	5	18.4581	17.6254	18.0418	0.015966	1.78102	1.78102	12Mo-KO_1Way up vs WT	1.1502	2.75782	0.832706	P29699	VMHTQCHSTPDSAEDVR	1xCarbamidomethyl [C6]; 1xOxidation [M2]; 1xPhospho [S12(100)]	1xCarbamidomethyl [C6]; 1xOxidation [M2]; 1xPhospho [T4(0); S8(0); T9(0); S12(100)]	NP_038493	3.72568e-05	0	Ahsg	alpha-2-HS-glycoprotein	11625	Ahsg	16 B1|16 13.74 cM	protein-coding	+2σ	17.7651	16.8316	17.517	18.2815	17.7319	18.0761	18.7715	18.1922	18.5188	18.732
72	172	P60710; P68033_SYELPDGQVITIGNER_1xPhospho [S1(100)]_1xPhospho [S1(100); Y2(0); T11(0)]	P60710; P68033	---	5	5	18.9067	19.2493	19.078	0.0161455	0.788634	-1.26801	12Mo-KO_1Way down vs WT	-1.51857	-1.0588	-0.342572	P60710; P68033	SYELPDGQVITIGNER	1xPhospho [S1(100)]	1xPhospho [S1(100); Y2(0); T11(0)]	---	0.0156637	0	Actb	actin, beta	11461	Actb	5 G2|5 81.8 cM	protein-coding	-1σ	19.3608	19.4683	19.0861	19.2329	19.0983	18.9156	18.6549	19.1832	18.8453	18.9345
1005	173	E9PYV1_SDLLIDENLLSPLAGEDDPFLLEGDVNEDCKPLILPDTKPK_1xCarbamidomethyl [C30]; 1xDeamidated [N27]; 1xPhospho [S11(96.2)]_1xCarbamidomethyl [C30]; 1xDeamidated [N27]; 1xPhospho [S1(3.8); S11(96.2); T38(0)]	E9PYV1	---	5	5	16.2128	16.7374	16.4751	0.0161818	0.695142	-1.43855	12Mo-KO_1Way down vs WT	-1.89632	-1.09129	-0.52462	E9PYV1	SDLLIDENLLSPLAGEDDPFLLEGDVNEDCKPLILPDTKPK	1xCarbamidomethyl [C30]; 1xDeamidated [N27]; 1xPhospho [S11(96.2)]	1xCarbamidomethyl [C30]; 1xDeamidated [N27]; 1xPhospho [S1(3.8); S11(96.2); T38(0)]	---	0.0450263	0.000921163	Nr3c1	nuclear receptor subfamily 3, group C, member 1	14815	Nr3c1	18 B3|18 21.09 cM	protein-coding	-1σ	16.4178	16.692	16.9022	17.1695	16.5055	16.3195	16.0816	15.8803	16.284	16.4984
2677	174	Q64213_TGDLGIPPNPEDRSPSPEPIYNSEGK_2xPhospho [S14(82.4); S23(99.1)]_2xPhospho [T1(0); S14(82.4); S16(18.5); Y21(0); S23(99.1)]	Q64213	---	5	5	19.1081	17.9347	18.5214	0.0165484	2.25554	2.25554	12Mo-KO_1Way up vs WT	1.21215	4.19705	1.17347	Q64213	TGDLGIPPNPEDRSPSPEPIYNSEGK	2xPhospho [S14(82.4); S23(99.1)]	2xPhospho [T1(0); S14(82.4); S16(18.5); Y21(0); S23(99.1)]	---	0.0676103	0.00104129	Sf1	splicing factor 1	22668	Sf1	19|19 A	protein-coding	+3σ	17.6579	17.7181	17.4485	17.5574	19.2915	18.4074	19.1646	19.275	19.4877	19.206
1505	175	P53986_EGKEDEASTDVDEKPK_1xPhospho [S8(94.5)]_1xPhospho [S8(94.5); T9(5.5)]	P53986	Slc16a1	5	5	22.1773	21.4198	21.7985	0.0166173	1.69052	1.69052	12Mo-KO_1Way up vs WT	1.13182	2.52501	0.757466	P53986	EGKEDEASTDVDEKPK	1xPhospho [S8(94.5)]	1xPhospho [S8(94.5); T9(5.5)]	NP_033222	5.50447e-06	0	Slc16a1	solute carrier family 16 (monocarboxylic acid transporters), member 1	20501	Slc16a1	3|3 F2.2	protein-coding	+2σ	21.2439	21.6975	20.879	21.5083	21.7706	22.0616	22.7402	21.8898	21.7082	22.4868
1822	176	Q80XU3_KDDSHSAEDSEDEKDDHK_1xPhospho [S10(100)]_1xPhospho [S4(0); S6(0); S10(100)]	Q80XU3	Nucks1	5	5	17.5206	15.9787	16.7496	0.0174865	2.91179	2.91179	12Mo-KO_1Way up vs WT	1.27495	6.65007	1.5419	Q80XU3	KDDSHSAEDSEDEKDDHK	1xPhospho [S10(100)]	1xPhospho [S4(0); S6(0); S10(100)]	NP_001139276	0.000130178	0	Nucks1	nuclear casein kinase and cyclin-dependent kinase substrate 1	98415	Nucks1	1|1 E4	protein-coding	+3σ	14.9409	15.7673	16.7361	15.4405	17.0086	16.6149	17.5551	16.916	18.3514	18.1656
1796	177	Q8C405_GGDTSDTESSIIIR_1xPhospho [S5(98.2)]_1xPhospho [T4(0.2); S5(98.2); T7(1.6); S9(0); S10(0)]	Q8C405	Sp100	5	5	16.8605	16.1493	16.5049	0.0174983	1.63723	1.63723	12Mo-KO_1Way up vs WT	1.1185	2.39652	0.711256	Q8C405	GGDTSDTESSIIIR	1xPhospho [S5(98.2)]	1xPhospho [T4(0.2); S5(98.2); T7(1.6); S9(0); S10(0)]	NP_038701	0.00579593	0	Sp100	nuclear antigen Sp100	20684	Sp100	1 C5|1 43.6 cM	protein-coding	+2σ	15.7985	16.1352	15.7249	16.5588	16.529	16.6933	16.726	16.4732	17.4146	16.9955
1731	178	P70670_EAPATLPPSPTK_1xPhospho [T11(93.1)]_1xPhospho [T5(0); S9(6.9); T11(93.1)]	P70670	Naca	5	5	18.4602	18.7809	18.6206	0.0178918	0.800727	-1.24886	12Mo-KO_1Way down vs WT	-1.48413	-1.05089	-0.320617	P70670	EAPATLPPSPTK	1xPhospho [T11(93.1)]	1xPhospho [T5(0); S9(6.9); T11(93.1)]	NP_001106670	0.0415324	0.000734311	Naca	nascent polypeptide-associated complex alpha polypeptide	17938	Naca	10|10 D3	protein-coding	-1σ	18.851	18.5735	18.7051	18.6473	19.1273	18.4011	18.367	18.4532	18.4484	18.6315
1163	179	G5E8J6_GDDEDISTEFGHK_1xPhospho [S7(99.5)]_1xPhospho [S7(99.5); T8(0.5)]	G5E8J6	Hrc	5	5	20.2229	19.7901	20.0065	0.0179378	1.3498	1.3498	12Mo-KO_1Way up vs WT	1.06916	1.70411	0.432746	G5E8J6	GDDEDISTEFGHK	1xPhospho [S7(99.5)]	1xPhospho [S7(99.5); T8(0.5)]	NP_034603	0.0047463	0	Hrc	histidine rich calcium binding protein	15464	Hrc	7 B3|7 29.26 cM	protein-coding	+1σ	19.5642	19.8152	19.4759	19.8737	20.2217	20.1896	20.1335	20.3699	20.0515	20.3699
551	180	Q63918_GNNSAVGSNADLTIEEDEEEEPVALQQAQQVR_1xDeamidated [N/Q]; 2xPhospho [S4(99.9); S8(92.4)]_1xDeamidated [N2; N3; N9; Q26; Q27; Q29; Q30]; 2xPhospho [S4(99.9); S8(92.4); T13(7.7)]	Q63918	Cavin2	5	5	19.0529	18.6272	18.8401	0.0179419	1.34315	1.34315	12Mo-KO_1Way up vs WT	1.06797	1.68925	0.425624	Q63918	GNNSAVGSNADLTIEEDEEEEPVALQQAQQVR	1xDeamidated [N/Q]; 2xPhospho [S4(99.9); S8(92.4)]	1xDeamidated [N2; N3; N9; Q26; Q27; Q29; Q30]; 2xPhospho [S4(99.9); S8(92.4); T13(7.7)]	NP_620080	0.000302135	0	Cavin2	caveolae associated 2	20324	Cavin2	1|1 C1.1	protein-coding	+1σ	18.6548	18.3704	18.9136	18.6134	18.584	19.3596	19.2217	19.0158	18.9761	18.6912
2382	181	Q64012_DDGDEEGLLTHSEEELEHSQDTDAEDGALQ_1xPhospho [S19(81.4)]_1xPhospho [T10(0.3); S12(0.1); S19(81.4); T22(18.3)]	Q64012	Raly	5	5	18.4533	17.7731	18.1132	0.0183359	1.60228	1.60228	12Mo-KO_1Way up vs WT	1.10884	2.31531	0.680127	Q64012	DDGDEEGLLTHSEEELEHSQDTDAEDGALQ	1xPhospho [S19(81.4)]	1xPhospho [T10(0.3); S12(0.1); S19(81.4); T22(18.3)]	NP_001132983	0.177587	0.00667009	Raly	hnRNP-associated with lethal yellow	19383	Raly	2 H1|2 76.83 cM	protein-coding	+2σ	17.7766	17.5042	17.7119	17.525	18.3481	18.3991	17.8232	18.5738	18.6369	18.8332
2292	182	Q9CSU0_TFQQIQEEEDDDYPGSYSPQDPSAGPLLTEELIK_1xPhospho [S18(98.6)]_1xPhospho [T1(0); Y13(0); S16(1.1); Y17(0); S18(98.6); S23(0.3); T29(0)]	Q9CSU0	Rprd1b	5	5	19.5979	19.0083	19.3031	0.018549	1.50483	1.50483	12Mo-KO_1Way up vs WT	1.0928	2.07221	0.589599	Q9CSU0	TFQQIQEEEDDDYPGSYSPQDPSAGPLLTEELIK	1xPhospho [S18(98.6)]	1xPhospho [T1(0); Y13(0); S16(1.1); Y17(0); S18(98.6); S23(0.3); T29(0)]	NP_001278063	0.000836186	0	Rprd1b	regulation of nuclear pre-mRNA domain containing 1B	70470	Rprd1b	2|2 H1	protein-coding	+2σ	19.3857	18.7659	19.2811	18.4857	19.1232	19.8738	19.5911	19.2037	19.6605	19.6605
1912	183	A0A0R4J0J0_MASPWEESSNR_1xPhospho [S3(100)]_1xPhospho [S3(100); S8(0); S9(0)]	A0A0R4J0J0	Palmd	5	5	18.4509	18.1533	18.3021	0.0186812	1.22912	1.22912	12Mo-KO_1Way up vs WT	1.04555	1.44491	0.297621	A0A0R4J0J0	MASPWEESSNR	1xPhospho [S3(100)]	1xPhospho [S3(100); S8(0); S9(0)]	NP_075734	0.212878	0.00932146	Palmd	palmdelphin	114301	Palmd	3 G1|3 50.49 cM	protein-coding	+1σ	18.4542	17.8923	18.2884	18.1235	18.0079	18.3902	18.4792	18.4374	18.4633	18.4842
2385	184	E9Q401_QSSMDSEGNFNPQPVDTSNITIPEK_1xPhospho [S2(97.5)]_1xPhospho [S2(97.5); S3(2.6); S6(0); T17(0); S18(0); T21(0)]	E9Q401	Ryr2	5	5	22.8736	23.2785	23.076	0.0189013	0.7553	-1.32398	12Mo-KO_1Way down vs WT	-1.6508	-1.06186	-0.404879	E9Q401	QSSMDSEGNFNPQPVDTSNITIPEK	1xPhospho [S2(97.5)]	1xPhospho [S2(97.5); S3(2.6); S6(0); T17(0); S18(0); T21(0)]	NP_076357	0.00194999	0	Ryr2	ryanodine receptor 2, cardiac	20191	Ryr2	13 A1|13 4.38 cM	protein-coding	-1σ	23.2743	23.3098	23.3875	23.4522	22.9688	22.8684	22.7212	23.2046	23.004	22.57
2331	185	F6WMJ3_MSGFMYQGK_1xPhospho [S2(100)]_1xPhospho [S2(100); Y6(0)]	F6WMJ3	Arhgef6	5	5	18.2378	17.6517	17.9447	0.0194927	1.50114	1.50114	12Mo-KO_1Way up vs WT	1.08836	2.07049	0.586063	F6WMJ3	MSGFMYQGK	1xPhospho [S2(100)]	1xPhospho [S2(100); Y6(0)]	NP_690014	0.0411395	0.000734311	Arhgef6	Rac/Cdc42 guanine nucleotide exchange factor (GEF) 6	73341	Arhgef6	X|X A6	protein-coding	+2σ	17.6863	17.1676	17.4698	18.2203	17.7146	18.154	18.2166	17.9289	18.3331	18.5564
2979	186	Q8VBT9_APGSPVSSLSADQASSSTLLPLNSGEFSR_1xDeamidated [N/Q]; 1xPhospho [S/T]_1xDeamidated [Q13; N23]; 1xPhospho [S4(32.7); S7(32.7); S8(32.7); S10(1.8); S15(0); S16(0); S17(0); T18(0); S24(0); S28(0)]	Q8VBT9	Aspscr1	5	5	17.0765	17.5119	17.2942	0.019566	0.739518	-1.35223	12Mo-KO_1Way down vs WT	-1.71741	-1.0647	-0.435344	Q8VBT9	APGSPVSSLSADQASSSTLLPLNSGEFSR	1xDeamidated [N/Q]; 1xPhospho [S/T]	1xDeamidated [Q13; N23]; 1xPhospho [S4(32.7); S7(32.7); S8(32.7); S10(1.8); S15(0); S16(0); S17(0); T18(0); S24(0); S28(0)]	NP_001157696	0.0386735	0.00049971	Aspscr1	alveolar soft part sarcoma chromosome region, candidate 1 (human)	68938	Aspscr1	11|11 E2	protein-coding	-1σ	17.5454	17.67	17.6499	17.3645	17.3297	17.024	16.7491	16.9425	17.1248	17.5424
2476	187	Q8BTI8_SGTPPRPGSVTNMQADECTATPQR_1xCarbamidomethyl [C18]; 2xPhospho [T3(84.6); S9(84.6)]_1xCarbamidomethyl [C18]; 2xPhospho [S1(15.5); T3(84.6); S9(84.6); T11(15.5); T19(0); T21(0)]	Q8BTI8	Srrm2	5	5	16.2144	16.8164	16.5154	0.0196896	0.658855	-1.51779	12Mo-KO_1Way down vs WT	-2.11336	-1.09005	-0.601968	Q8BTI8	SGTPPRPGSVTNMQADECTATPQR	1xCarbamidomethyl [C18]; 2xPhospho [T3(84.6); S9(84.6)]	1xCarbamidomethyl [C18]; 2xPhospho [S1(15.5); T3(84.6); S9(84.6); T11(15.5); T19(0); T21(0)]	NP_780438	0.0159646	0	Srrm2	serine/arginine repetitive matrix 2	75956	Srrm2	17|17 A3.3	protein-coding	-2σ	16.9002	17.0563	16.9093	16.8829	16.3333	16.4716	16.2351	16.0731	16.621	15.6714
448	188	P61014_RASTIEMPQQAR_1xPhospho [S3(99.7)]_1xPhospho [S3(99.7); T4(0.3)]	P61014	Pln	5	5	24.0495	23.4796	23.7645	0.0198885	1.4844	1.4844	12Mo-KO_1Way up vs WT	1.08428	2.03217	0.569882	P61014	RASTIEMPQQAR	1xPhospho [S3(99.7)]	1xPhospho [S3(99.7); T4(0.3)]	NP_001135399	0.000659186	0	Pln	phospholamban	18821	Pln	10|10 B3	protein-coding	+2σ	23.5652	23.2396	23.7903	23.4153	23.3875	23.872	24.4837	23.5955	23.872	24.4243
477	189	E9QLJ0_GASSPTGLSEQGQEEDNIGPLSPDSAFASEFSFSPYPTQELEK_1xDeamidated [N/Q]; 1xPhospho [S/T/Y]_1xDeamidated [Q11; Q13; N17; Q39]; 1xPhospho [S3(38.5); S4(38.5); T6(11.2); S9(11.2); S22(0.3); S25(0.3); S29(0); S32(0); S34(0); Y36(0); T38(0)]	E9QLJ0	Cmya5	5	5	19.4824	19.9266	19.7045	0.0198931	0.735012	-1.36052	12Mo-KO_1Way down vs WT	-1.73791	-1.06509	-0.444161	E9QLJ0	GASSPTGLSEQGQEEDNIGPLSPDSAFASEFSFSPYPTQELEK	1xDeamidated [N/Q]; 1xPhospho [S/T/Y]	1xDeamidated [Q11; Q13; N17; Q39]; 1xPhospho [S3(38.5); S4(38.5); T6(11.2); S9(11.2); S22(0.3); S25(0.3); S29(0); S32(0); S34(0); Y36(0); T38(0)]	NP_076310	0.00659025	0	Cmya5	cardiomyopathy associated 5	76469	Cmya5	13|13 C3	protein-coding	-1σ	20.148	19.7183	19.9772	20.0052	19.7842	19.5079	19.9256	19.3838	19.1071	19.4877
1495	190	P63085_VADPDHDHTGFLTEYVATR_2xPhospho [T13(99.7); T18(99.9)]_2xPhospho [T9(0); T13(99.7); Y15(0.3); T18(99.9)]	P63085	Mapk1	5	5	16.3053	15.075	15.6901	0.0203176	2.34621	2.34621	12Mo-KO_1Way up vs WT	1.187	4.63749	1.23033	P63085	VADPDHDHTGFLTEYVATR	2xPhospho [T13(99.7); T18(99.9)]	2xPhospho [T9(0); T13(99.7); Y15(0.3); T18(99.9)]	NP_001033752	0.200491	0.00788275	Mapk1	mitogen-activated protein kinase 1	26413	Mapk1	16 A3|16 10.53 cM	protein-coding	+3σ	14.8581	14.5901	15.2911	15.6948	14.9409	14.8366	16.3088	16.6542	16.837	16.89
1824	191	Q80XU3_DDSHSAEDSEDEKDDHK_1xPhospho [S9(100)]_1xPhospho [S3(0); S5(0); S9(100)]	Q80XU3	Nucks1	5	5	18.0837	16.5708	17.3272	0.0203547	2.85398	2.85398	12Mo-KO_1Way up vs WT	1.23426	6.59928	1.51298	Q80XU3	DDSHSAEDSEDEKDDHK	1xPhospho [S9(100)]	1xPhospho [S3(0); S5(0); S9(100)]	NP_001139276	0.00105568	0	Nucks1	nuclear casein kinase and cyclin-dependent kinase substrate 1	98415	Nucks1	1|1 E4	protein-coding	+3σ	15.6074	16.2025	17.7301	15.6734	17.6403	17.3848	18.7299	17.8588	18.495	17.9502
2698	192	Q9Z1W9_TPDIAQR_1xPhospho [T1(100)]_1xPhospho [T1(100)]	Q9Z1W9	Stk39	5	5	17.2559	17.6209	17.4384	0.0204138	0.776471	-1.28788	12Mo-KO_1Way down vs WT	-1.57672	-1.05195	-0.364996	Q9Z1W9	TPDIAQR	1xPhospho [T1(100)]	1xPhospho [T1(100)]	NP_058562	0.096324	0.00244569	Stk39	serine/threonine kinase 39	53416	Stk39	2|2 C1.3	protein-coding	-1σ	17.8657	17.3516	17.5682	17.5227	17.7961	17.4408	17.3056	17.0604	17.05	17.4225
3293	193	Q8VDJ3_VATLNSEEENDPPTYK_1xPhospho [S6(100)]_1xPhospho [T3(0); S6(100); T14(0); Y15(0)]	Q8VDJ3	Hdlbp	5	5	16.799	17.2646	17.0318	0.0204214	0.72413	-1.38097	12Mo-KO_1Way down vs WT	-1.78779	-1.06672	-0.46568	Q8VDJ3	VATLNSEEENDPPTYK	1xPhospho [S6(100)]	1xPhospho [T3(0); S6(100); T14(0); Y15(0)]	NP_001288293	0.0185895	0	Hdlbp	high density lipoprotein (HDL) binding protein	110611	Hdlbp	1 D|1 47.24 cM	protein-coding	-1σ	16.9999	17.3971	17.6122	17.3297	16.9844	16.6832	16.7587	17.1336	16.9191	16.5003
192	194	P82350_VDSAQMPLILDQH_1xPhospho [S3(100)]_1xPhospho [S3(100)]	P82350	Sgca	5	5	19.7617	20.126	19.9439	0.0204673	0.776807	-1.28732	12Mo-KO_1Way down vs WT	-1.57568	-1.05173	-0.364371	P82350	VDSAQMPLILDQH	1xPhospho [S3(100)]	1xPhospho [S3(100)]	NP_033187	0.000937312	0	Sgca	sarcoglycan, alpha (dystrophin-associated glycoprotein)	20391	Sgca	11|11 D	protein-coding	-1σ	20.2673	20.4391	20.037	20.013	19.8737	19.6989	20.0204	19.7917	19.749	19.5482
1265	195	F8VQC7_EIQNGTLRESDSEHVPR_1xDeamidated [N/Q]; 1xPhospho [T6(90.7)]_1xDeamidated [Q3; N4]; 1xPhospho [T6(90.7); S10(9.2); S12(0.1)]	F8VQC7	Ktn1	5	5	18.7802	17.9704	18.3753	0.0205408	1.75305	1.75305	12Mo-KO_1Way up vs WT	1.11822	2.74828	0.809864	F8VQC7	EIQNGTLRESDSEHVPR	1xDeamidated [N/Q]; 1xPhospho [T6(90.7)]	1xDeamidated [Q3; N4]; 1xPhospho [T6(90.7); S10(9.2); S12(0.1)]	NP_032503	0.190377	0.00753256	Ktn1	kinectin 1	16709	Ktn1	14|14 C1	protein-coding	+2σ	17.9005	17.2971	18.3546	18.1862	18.1135	19.2563	19.013	19.0097	18.5718	18.0503
2988	196	Q8VBT0_VEEEQEADEEDVSEEEAEDR_1xDeamidated [Q5]; 1xPhospho [S13(100)]_1xDeamidated [Q5]; 1xPhospho [S13(100)]	Q8VBT0	Tmx1	5	5	17.7612	18.6151	18.1882	0.020563	0.553294	-1.80736	12Mo-KO_1Way down vs WT	-2.90385	-1.1249	-0.853881	Q8VBT0	VEEEQEADEEDVSEEEAEDR	1xDeamidated [Q5]; 1xPhospho [S13(100)]	1xDeamidated [Q5]; 1xPhospho [S13(100)]	NP_082615	9.33318e-06	0	Tmx1	thioredoxin-related transmembrane protein 1	72736	Tmx1	12|12 C2	protein-coding	-2σ	18.1218	17.7668	19.0884	19.0328	19.0657	17.4295	17.9732	17.9032	17.6492	17.8509
3139	197	Q61687_EENVNSPEDKR_1xPhospho [S6(100)]_1xPhospho [S6(100)]	Q61687	Atrx	5	5	16.0467	16.4591	16.2529	0.0208669	0.751375	-1.33089	12Mo-KO_1Way down vs WT	-1.67468	-1.05768	-0.412394	Q61687	EENVNSPEDKR	1xPhospho [S6(100)]	1xPhospho [S6(100)]	NP_033556	0.0118306	0	Atrx	ATRX, chromatin remodeler	22589	Atrx	X D|X 47.26 cM	protein-coding	-1σ	16.1857	16.6873	16.2918	16.6155	16.5153	16.0796	16.0117	16.4043	16.0059	15.7321
2771	198	A0A1B0GS91_KLSVDNNTSATDYK_1xDeamidated [N]; 1xPhospho [S3(100)]_1xDeamidated [N6; N7]; 1xPhospho [S3(100); T8(0); S9(0); T11(0); Y13(0)]	A0A1B0GS91	---	5	5	17.7587	18.5971	18.1779	0.0209096	0.55926	-1.78808	12Mo-KO_1Way down vs WT	-2.85334	-1.12052	-0.838409	A0A1B0GS91	KLSVDNNTSATDYK	1xDeamidated [N]; 1xPhospho [S3(100)]	1xDeamidated [N6; N7]; 1xPhospho [S3(100); T8(0); S9(0); T11(0); Y13(0)]	---	0.000107111	0	Svil	supervillin	225115	Svil	18|18 A1	protein-coding	-2σ	18.2405	19.2275	18.8629	17.8943	18.7604	17.7953	18.2667	17.3619	17.3965	17.9732
2575	199	A0A0R4J1M7_LSSGTEDGGDDR_1xPhospho [S3(98.5)]_1xPhospho [S2(0); S3(98.5); T5(1.5)]	A0A0R4J1M7	Scn5a	5	5	15.3925	16.0134	15.7029	0.0209437	0.650287	-1.53778	12Mo-KO_1Way down vs WT	-2.17395	-1.08778	-0.620851	A0A0R4J1M7	LSSGTEDGGDDR	1xPhospho [S3(98.5)]	1xPhospho [S2(0); S3(98.5); T5(1.5)]	NP_067519	0.0870033	0.00215274	Scn5a	sodium channel, voltage-gated, type V, alpha	20271	Scn5a	9 F3|9 71.33 cM	protein-coding	-2σ	15.8164	15.8504	15.9945	15.8125	16.5932	15.5867	15.3042	15.8563	15.2992	14.9164
1342	200	E9PYF4_EVIATEDVASLSSPTLPSSSLSHDR_1xPhospho [S12(80.6)]_1xPhospho [T5(0.1); S10(14); S12(80.6); S13(2.6); T15(2.6); S18(0.1); S19(0); S20(0); S22(0)]	E9PYF4	Lmo7	5	5	17.9067	18.7511	18.3289	0.0210994	0.556922	-1.79558	12Mo-KO_1Way down vs WT	-2.87777	-1.12035	-0.844453	E9PYF4	EVIATEDVASLSSPTLPSSSLSHDR	1xPhospho [S12(80.6)]	1xPhospho [T5(0.1); S10(14); S12(80.6); S13(2.6); T15(2.6); S18(0.1); S19(0); S20(0); S22(0)]	NP_963287	0.0194952	0	Lmo7	LIM domain only 7	380928	Lmo7	14 E2.3|14 50.9 cM	protein-coding	-2σ	18.6669	18.1469	19.3117	19.4014	18.2288	17.9405	17.861	17.9937	17.4532	18.2849
2371	201	Q3UQS8_SHSPPGPSR_1xPhospho [S3(100)]_1xPhospho [S1(0); S3(100); S8(0)]	Q3UQS8	Rbm20	5	5	18.5906	17.9842	18.2874	0.0211323	1.52246	1.52246	12Mo-KO_1Way up vs WT	1.0849	2.13651	0.606409	Q3UQS8	SHSPPGPSR	1xPhospho [S3(100)]	1xPhospho [S1(0); S3(100); S8(0)]	NP_001164318	0.211971	0.0092042	Rbm20	RNA binding motif protein 20	73713	Rbm20	19|19 D2	protein-coding	+2σ	17.96	18.1727	18.1765	17.3198	18.2919	18.388	18.7255	18.799	18.8176	18.2228
1696	202	P26645_EAAEAEPAEPSSPAAEAEGASASSTSSPK_1xPhospho [S11(85.5)]_1xPhospho [S11(85.5); S12(14.5); S21(0); S23(0); S24(0); T25(0); S26(0); S27(0)]	P26645	Marcks	5	5	16.1469	16.9203	16.5336	0.0215718	0.585037	-1.70929	12Mo-KO_1Way down vs WT	-2.63864	-1.10727	-0.773401	P26645	EAAEAEPAEPSSPAAEAEGASASSTSSPK	1xPhospho [S11(85.5)]	1xPhospho [S11(85.5); S12(14.5); S21(0); S23(0); S24(0); T25(0); S26(0); S27(0)]	NP_032564	0.000233691	0	Marcks	myristoylated alanine rich protein kinase C substrate	17118	Marcks	10 B1|10 19.49 cM	protein-coding	-2σ	17.3705	16.9526	16.6746	16.3239	17.2799	16.1613	15.9584	16.8612	16.0085	15.745
1574	203	Q3UIZ8_KGSLADGPEENKEQAEVAGVKPNHVLTTGGVQADASR_1xDeamidated [N/Q]; 1xPhospho [S3(100)]_1xDeamidated [N11; Q14; N23; Q32]; 1xPhospho [S3(100); T27(0); T28(0); S36(0)]	Q3UIZ8	Mylk3	5	5	18.7845	21.3507	20.0676	0.0216224	0.168852	-5.92236	12Mo-KO_1Way down vs WT	-25.0316	-1.4012	-2.56617	Q3UIZ8	KGSLADGPEENKEQAEVAGVKPNHVLTTGGVQADASR	1xDeamidated [N/Q]; 1xPhospho [S3(100)]	1xDeamidated [N11; Q14; N23; Q32]; 1xPhospho [S3(100); T27(0); T28(0); S36(0)]	NP_001284541	3.72568e-05	0	Mylk3	myosin light chain kinase 3	213435	Mylk3	8|8 C3	protein-coding	-6σ	21.6748	20.9553	21.0156	21.7897	21.3179	21.4107	16.8424	19.8259	16.8139	19.0296
586	204	Q9DCC5_KSLSDSESDDSK_1xPhospho [S4(100)]_1xPhospho [S2(0); S4(100); S6(0); S8(0); S11(0)]	Q9DCC5	Cbx3	5	5	16.4517	15.4953	15.9735	0.0216693	1.94041	1.94041	12Mo-KO_1Way up vs WT	1.13366	3.32129	0.956364	Q9DCC5	KSLSDSESDDSK	1xPhospho [S4(100)]	1xPhospho [S2(0); S4(100); S6(0); S8(0); S11(0)]	NP_031650	0.000192283	0	Cbx3	chromobox 3	12417	Cbx3	6 B3|6 24.89 cM	protein-coding	+2σ	14.5416	15.6187	16.2201	15.2741	15.822	15.9511	16.6339	16.1188	16.9336	16.621
1865	205	A2AAJ9_TGEADLSHTSSDDESR_2xPhospho [T9(87.5); S11(98.5)]_2xPhospho [T1(0); S7(1.5); T9(87.5); S10(12.5); S11(98.5); S15(0)]	A2AAJ9	---	5	5	17.613	18.2306	17.9218	0.0217837	0.651763	-1.5343	12Mo-KO_1Way down vs WT	-2.1718	-1.08393	-0.61758	A2AAJ9	TGEADLSHTSSDDESR	2xPhospho [T9(87.5); S11(98.5)]	2xPhospho [T1(0); S7(1.5); T9(87.5); S10(12.5); S11(98.5); S15(0)]	---	1.07137e-05	0	Obscn	obscurin, cytoskeletal calmodulin and titin-interacting RhoGEF	380698	Obscn	11|11 B1.3	protein-coding	-2σ	18.7421	18.2063	18.2458	18.1038	17.8551	17.4821	17.3736	17.9921	18.0008	17.2166
1550	206	Q62234_GGMNGASPPTSQK_1xDeamidated [N4]; 1xPhospho [S7(100)]_1xDeamidated [N4]; 1xPhospho [S7(100); T10(0); S11(0)]	Q62234	Myom1	5	5	20.7731	21.0507	20.9119	0.0218719	0.824965	-1.21217	12Mo-KO_1Way down vs WT	-1.41729	-1.03674	-0.277594	Q62234	GGMNGASPPTSQK	1xDeamidated [N4]; 1xPhospho [S7(100)]	1xDeamidated [N4]; 1xPhospho [S7(100); T10(0); S11(0)]	NP_001077403	0.00992132	0	Myom1	myomesin 1	17929	Myom1	17|17 E1.3	protein-coding	-1σ	20.8634	21.0855	21.2361	20.8544	21.2142	20.6901	20.7304	20.9793	20.7113	20.7546
977	207	P23242_MGQAGSTISNSHAQPFDFPDDSQNAK_1xDeamidated [N/Q]; 2xPhospho [S/T]_1xDeamidated [Q3; N10; Q14; Q23; N24]; 2xPhospho [S6(55.3); T7(44.7); S9(50); S11(50); S22(0)]	P23242	Gja1	5	5	16.682	18.2549	17.4685	0.0220833	0.336145	-2.9749	12Mo-KO_1Way down vs WT	-7.22788	-1.22443	-1.57284	P23242	MGQAGSTISNSHAQPFDFPDDSQNAK	1xDeamidated [N/Q]; 2xPhospho [S/T]	1xDeamidated [Q3; N10; Q14; Q23; N24]; 2xPhospho [S6(55.3); T7(44.7); S9(50); S11(50); S22(0)]	NP_034418	0.000266985	0	Gja1	gap junction protein, alpha 1	14609	Gja1	10 B4|10 28.64 cM	protein-coding	-3σ	19.1097	16.1721	18.4528	19.2003	18.3395	16.8255	16.9191	16.5749	16.4139	16.6769
522	208	O54724_ESEALPEKEGDELGEGERPEDDTAAIELSSDEAVEVEEVIEESR_2xPhospho [S29(99.3); S30(99.3)]_2xPhospho [S2(0.3); T23(1); S29(99.3); S30(99.3); S43(0)]	O54724	Cavin1	5	5	19.5128	17.8271	18.67	0.0221661	3.21677	3.21677	12Mo-KO_1Way up vs WT	1.24132	8.33594	1.68561	O54724	ESEALPEKEGDELGEGERPEDDTAAIELSSDEAVEVEEVIEESR	2xPhospho [S29(99.3); S30(99.3)]	2xPhospho [S2(0.3); T23(1); S29(99.3); S30(99.3); S43(0)]	NP_033012	0.00456907	0	Cavin1	caveolae associated 1	19285	Cavin1	11 D|11 63.95 cM	protein-coding	+6σ	18.4787	18.3324	18.3574	15.6692	18.298	18.7498	19.1886	19.5674	20.1609	19.897
944	209	Q61584_DPDSNPYSLLDNTESDQTADTDASESHHSTNR_1xPhospho [S/T/Y]_1xPhospho [S4(49.7); Y7(0); S8(49.7); T13(0.1); S15(0.4); T18(0); T21(0); S24(0); S26(0); S29(0); T30(0)]	Q61584	Fxr1	5	5	17.4306	16.8552	17.1429	0.0222052	1.49012	1.49012	12Mo-KO_1Way up vs WT	1.07645	2.06277	0.57543	Q61584	DPDSNPYSLLDNTESDQTADTDASESHHSTNR	1xPhospho [S/T/Y]	1xPhospho [S4(49.7); Y7(0); S8(49.7); T13(0.1); S15(0.4); T18(0); T21(0); S24(0); S26(0); S29(0); T30(0)]	NP_001106659	0.00383169	0	Fxr1	fragile X mental retardation gene 1, autosomal homolog	14359	Fxr1	3|3 A3	protein-coding	+2σ	16.9321	16.7712	17.3395	16.3195	16.9136	17.1675	17.8672	17.4096	17.2594	17.4494
2480	210	Q8BTI8_QSHSESSPDGEVK_1xPhospho [S]_1xPhospho [S2(0); S4(0); S6(50); S7(50)]	Q8BTI8	Srrm2	5	5	14.255	14.7879	14.5214	0.0225594	0.69113	-1.44691	12Mo-KO_1Way down vs WT	-1.95761	-1.06944	-0.532972	Q8BTI8	QSHSESSPDGEVK	1xPhospho [S]	1xPhospho [S2(0); S4(0); S6(50); S7(50)]	NP_780438	0.0882224	0.00215274	Srrm2	serine/arginine repetitive matrix 2	75956	Srrm2	17|17 A3.3	protein-coding	-1σ	14.5175	15.2257	14.6448	14.6027	14.949	14.5066	14.4433	14.4795	13.9228	13.9228
3001	211	B9EHJ3_AVPVSPSAVEEDEDEDGHTVVATAR_1xPhospho [S5(98.3)]_1xPhospho [S5(98.3); S7(1.8); T19(0); T23(0)]	B9EHJ3	Tjp1	5	5	18.6947	19.1906	18.9427	0.0227801	0.709099	-1.41024	12Mo-KO_1Way down vs WT	-1.86953	-1.06379	-0.495942	B9EHJ3	AVPVSPSAVEEDEDEDGHTVVATAR	1xPhospho [S5(98.3)]	1xPhospho [S5(98.3); S7(1.8); T19(0); T23(0)]	NP_001157046	6.84921e-05	0	Tjp1	tight junction protein 1	21872	Tjp1	7 C|7 35.02 cM	protein-coding	-1σ	19.7326	18.9671	19.2526	18.9859	19.0149	18.8006	18.3331	18.6995	18.7009	18.9392
1344	212	E9PYF4_SRSTTELNDPLIEKNGSSK_1xDeamidated [N15]; 1xPhospho [T5(98.6)]_1xDeamidated [N8; N15]; 1xPhospho [S1(0); S3(0.7); T4(0.7); T5(98.6); S17(0); S18(0)]	E9PYF4	Lmo7	5	5	18.2587	17.1717	17.7152	0.0229196	2.12433	2.12433	12Mo-KO_1Way up vs WT	1.14415	3.94422	1.08701	E9PYF4	SRSTTELNDPLIEKNGSSK	1xDeamidated [N15]; 1xPhospho [T5(98.6)]	1xDeamidated [N8; N15]; 1xPhospho [S1(0); S3(0.7); T4(0.7); T5(98.6); S17(0); S18(0)]	NP_963287	0.0207388	0.000280731	Lmo7	LIM domain only 7	380928	Lmo7	14 E2.3|14 50.9 cM	protein-coding	+2σ	16.8981	16.6237	17.1695	17.8334	17.3339	18.5037	18.6475	17.0221	18.2166	18.9038
948	213	Q61584_GYATDESTVSSVQGSR_1xPhospho [T4(91)]_1xPhospho [Y2(2.9); T4(91); S7(2.9); T8(2.9); S10(0.1); S11(0); S15(0)]	Q61584	Fxr1	5	5	15.7426	16.582	16.1623	0.0230186	0.558854	-1.78938	12Mo-KO_1Way down vs WT	-2.887	-1.10906	-0.839458	Q61584	GYATDESTVSSVQGSR	1xPhospho [T4(91)]	1xPhospho [Y2(2.9); T4(91); S7(2.9); T8(2.9); S10(0.1); S11(0); S15(0)]	NP_001106659	0.107062	0.00260819	Fxr1	fragile X mental retardation gene 1, autosomal homolog	14359	Fxr1	3|3 A3	protein-coding	-2σ	16.1762	16.3239	17.4248	16.4225	16.5627	16.1451	15.9637	16.0556	15.4697	15.0788
1009	214	A0A0A0MQF6_VIHDNFGIVEGLMTTVHAITATQK_1xPhospho [T22(99.2)]_1xPhospho [T14(0); T15(0); T20(0.8); T22(99.2)]	A0A0A0MQF6	Gapdh	5	5	19.9355	19.2874	19.6115	0.023066	1.56708	1.56708	12Mo-KO_1Way up vs WT	1.08301	2.26752	0.648078	A0A0A0MQF6	VIHDNFGIVEGLMTTVHAITATQK	1xPhospho [T22(99.2)]	1xPhospho [T14(0); T15(0); T20(0.8); T22(99.2)]	NP_001276655	1.66792e-06	0	Gapdh	glyceraldehyde-3-phosphate dehydrogenase	14433	Gapdh	6 F2|6 59.32 cM	protein-coding	+2σ	19.2254	19.0843	19.0712	20.0255	19.0305	20.1568	20.3292	19.6085	19.7091	19.8738
294	215	Q9D5T0_EYVNSTSEESHDEDEIRPVQQQDLHR_1xPhospho [S10(92.4)]_1xPhospho [Y2(0); S5(0.6); T6(0.6); S7(6.5); S10(92.4)]	Q9D5T0	Atad1	5	5	18.1041	17.1156	17.6099	0.0231546	1.98405	1.98405	12Mo-KO_1Way up vs WT	1.12876	3.48742	0.98845	Q9D5T0	EYVNSTSEESHDEDEIRPVQQQDLHR	1xPhospho [S10(92.4)]	1xPhospho [Y2(0); S5(0.6); T6(0.6); S7(6.5); S10(92.4)]	NP_080763	0.129575	0.00353173	Atad1	ATPase family, AAA domain containing 1	67979	Atad1	19|19 C1	protein-coding	+2σ	17.2226	16.0078	17.5591	17.5058	17.2829	17.3311	18.2072	18.0744	18.5564	18.3514
2925	216	O70548_SMSQEAQR_1xPhospho [S3(100)]_1xPhospho [S1(0); S3(100)]	O70548	Tcap	5	5	19.614	20.7692	20.1916	0.0231744	0.449015	-2.2271	12Mo-KO_1Way down vs WT	-4.30587	-1.15191	-1.15517	O70548	SMSQEAQR	1xPhospho [S3(100)]	1xPhospho [S1(0); S3(100)]	NP_035670	0.0407502	0.000734311	Tcap	titin-cap	21393	Tcap	11|11 D	protein-coding	-3σ	21.1085	21.0272	20.4474	20.7762	20.4864	19.981	19.1324	20.7952	19.675	18.4863
1571	217	Q3UIZ8_IPINMQEMATPGELLETQSGSPIGSAEAPGLGTVLEDQIPK_1xPhospho [S/T]_1xPhospho [T10(0.4); T17(4.8); S19(4.8); S21(18.3); S25(71.8); T33(0)]	Q3UIZ8	Mylk3	5	5	22.3354	22.5507	22.443	0.0232072	0.861369	-1.16094	12Mo-KO_1Way down vs WT	-1.31278	-1.02667	-0.215296	Q3UIZ8	IPINMQEMATPGELLETQSGSPIGSAEAPGLGTVLEDQIPK	1xPhospho [S/T]	1xPhospho [T10(0.4); T17(4.8); S19(4.8); S21(18.3); S25(71.8); T33(0)]	NP_001284541	3.60367e-05	0	Mylk3	myosin light chain kinase 3	213435	Mylk3	8|8 C3	protein-coding	-0.5σ	22.7184	22.5544	22.4651	22.5898	22.4256	22.468	22.4288	22.2261	22.1757	22.3784
1226	218	E9Q0N0_SGSGMSVISSSSVDQR_1xPhospho [S1(89.7)]_1xPhospho [S1(89.7); S3(10.3); S6(0); S9(0); S10(0); S11(0); S12(0)]	E9Q0N0	---	5	5	17.1568	17.5498	17.3533	0.023504	0.761528	-1.31315	12Mo-KO_1Way down vs WT	-1.64457	-1.04852	-0.393031	E9Q0N0	SGSGMSVISSSSVDQR	1xPhospho [S1(89.7)]	1xPhospho [S1(89.7); S3(10.3); S6(0); S9(0); S10(0); S11(0); S12(0)]	---	0.029349	0.00049971	Itsn1	intersectin 1 (SH3 domain protein 1A)	16443	Itsn1	16|16 C4	protein-coding	-1σ	17.4715	17.543	17.9784	17.3411	17.4149	16.9606	17.407	17.0628	17.0462	17.3072
1652	219	Q02566; Q91Z83_VQLLHSQNTSLINQK_1xPhospho [S6(92)]_1xPhospho [S6(92); T9(7.9); S10(0.1)]	Q02566; Q91Z83	---	5	5	18.6127	17.511	18.0618	0.0235787	2.14604	2.14604	12Mo-KO_1Way up vs WT	1.1415	4.03459	1.10168	Q02566; Q91Z83	VQLLHSQNTSLINQK	1xPhospho [S6(92)]	1xPhospho [S6(92); T9(7.9); S10(0.1)]	---	0.0102572	0	Myh6	myosin, heavy polypeptide 6, cardiac muscle, alpha	17888	Myh6	14 C3|14 28.01 cM	protein-coding	+2σ	18.1912	17.2385	17.7084	18.1821	16.2348	18.2006	18.6261	18.4328	18.684	19.1199
788	220	Q69ZR2_VSALAGPSSDDENEEESKPEKEDEPQEDAK_1xDeamidated [Q/N]; 1xPhospho [S17(94.6)]_1xDeamidated [N13; Q26]; 1xPhospho [S2(0); S8(4.4); S9(1); S17(94.6)]	Q69ZR2	---	5	5	18.4516	17.8169	18.1343	0.0236356	1.55259	1.55259	12Mo-KO_1Way up vs WT	1.07901	2.23405	0.634681	Q69ZR2	VSALAGPSSDDENEEESKPEKEDEPQEDAK	1xDeamidated [Q/N]; 1xPhospho [S17(94.6)]	1xDeamidated [N13; Q26]; 1xPhospho [S2(0); S8(4.4); S9(1); S17(94.6)]	---	0.0110159	0	Hectd1	HECT domain E3 ubiquitin protein ligase 1	207304	Hectd1	12 B3|12 22.11 cM	protein-coding	+2σ	17.7023	17.6668	17.7181	17.9733	18.0241	18.7678	19.0097	17.751	18.4208	18.3087
382	221	Q9WV35_EEAAEAAAPASQNGDDLENLEDPEK_1xPhospho [S11(100)]_1xPhospho [S11(100)]	Q9WV35	Apobec2	5	5	17.3356	15.3856	16.3606	0.0236423	3.86366	3.86366	12Mo-KO_1Way up vs WT	1.26307	11.8187	1.94997	Q9WV35	EEAAEAAAPASQNGDDLENLEDPEK	1xPhospho [S11(100)]	1xPhospho [S11(100)]	NP_033824	0.00452581	0	Apobec2	apolipoprotein B mRNA editing enzyme, catalytic polypeptide 2	11811	Apobec2	17 C|17 24.02 cM	protein-coding	+6σ	17.9733	14.4811	14.4194	14.8775	15.1768	16.944	17.8744	17.8335	17.2738	16.7522
1566	222	Q5DTJ9_VSTVQQCQSPTNYLQGLNGKPIIAAPVFTK_1xCarbamidomethyl [C7]; 2xDeamidated [N/Q]; 1xPhospho [S/T/Y]_1xCarbamidomethyl [C7]; 2xDeamidated [Q5; Q6; Q8; N12; Q15; N18]; 1xPhospho [S2(49.3); T3(49.3); S9(1.2); T11(0.1); Y13(0); T29(0)]	Q5DTJ9	Mypn	5	5	17.0415	17.8528	17.4472	0.0240949	0.569874	-1.75477	12Mo-KO_1Way down vs WT	-2.79987	-1.09978	-0.811285	Q5DTJ9	VSTVQQCQSPTNYLQGLNGKPIIAAPVFTK	1xCarbamidomethyl [C7]; 2xDeamidated [N/Q]; 1xPhospho [S/T/Y]	1xCarbamidomethyl [C7]; 2xDeamidated [Q5; Q6; Q8; N12; Q15; N18]; 1xPhospho [S2(49.3); T3(49.3); S9(1.2); T11(0.1); Y13(0); T29(0)]	NP_892037	0.0335304	0.00049971	Mypn	myopalladin	68802	Mypn	10|10 B4	protein-coding	-2σ	17.899	18.3408	18.0264	18.159	16.8387	17.272	17.0165	17.1889	17.164	16.5661
2402	223	Q7TQ48_AEVDTESGEKVEDQGEPRPSLDAGSAIEANK_1xDeamidated [Q14]; 1xPhospho [S7(96.3)]_1xDeamidated [Q14; N30]; 1xPhospho [T5(3.7); S7(96.3); S20(0); S25(0)]	Q7TQ48	Srl	5	5	19.0563	18.4688	18.7626	0.0242526	1.50269	1.50269	12Mo-KO_1Way up vs WT	1.07075	2.10886	0.587546	Q7TQ48	AEVDTESGEKVEDQGEPRPSLDAGSAIEANK	1xDeamidated [Q14]; 1xPhospho [S7(96.3)]	1xDeamidated [Q14; N30]; 1xPhospho [T5(3.7); S7(96.3); S20(0); S25(0)]	NP_001334091	0.00110186	0	Srl	sarcalumenin	106393	Srl	16|16 A1	protein-coding	+2σ	18.5735	18.2311	18.0596	19.1335	18.3462	19.1965	18.6769	19.0579	19.263	19.0874
2049	224	Q9QXS1_SSSVGSSSSYPISSAGPR_1xPhospho [S3(99.5)]_1xPhospho [S1(0); S2(0.5); S3(99.5); S6(0); S7(0); S8(0); S9(0); Y10(0); S13(0); S14(0)]	Q9QXS1	Plec	5	5	19.8261	20.2467	20.0364	0.0254928	0.747136	-1.33844	12Mo-KO_1Way down vs WT	-1.71077	-1.04715	-0.420558	Q9QXS1	SSSVGSSSSYPISSAGPR	1xPhospho [S3(99.5)]	1xPhospho [S1(0); S2(0.5); S3(99.5); S6(0); S7(0); S8(0); S9(0); Y10(0); S13(0); S14(0)]	NP_001157012	0.002826	0	Plec	plectin	18810	Plec	15 D3|15 35.48 cM	protein-coding	-1σ	20.5187	19.8838	19.9531	20.359	20.5187	20.0366	19.6279	19.7625	19.897	19.8067
172	225	P29699_VMHTQCHSTPDSAEDVR_1xCarbamidomethyl [C6]; 1xDeamidated [Q5]; 1xPhospho [S12(100)]_1xCarbamidomethyl [C6]; 1xDeamidated [Q5]; 1xPhospho [T4(0); S8(0); T9(0); S12(100)]	P29699	Ahsg	5	5	16.2015	17.023	16.6122	0.0256279	0.565848	-1.76726	12Mo-KO_1Way down vs WT	-2.8561	-1.09352	-0.821513	P29699	VMHTQCHSTPDSAEDVR	1xCarbamidomethyl [C6]; 1xDeamidated [Q5]; 1xPhospho [S12(100)]	1xCarbamidomethyl [C6]; 1xDeamidated [Q5]; 1xPhospho [T4(0); S8(0); T9(0); S12(100)]	NP_038493	3.72568e-05	0	Ahsg	alpha-2-HS-glycoprotein	11625	Ahsg	16 B1|16 13.74 cM	protein-coding	-2σ	17.299	17.7887	17.0809	16.1555	16.7911	16.0297	16.5981	16.294	15.8356	16.25
1883	226	Q3B7Z2_GDMSDEDDENEFFDAPEIITMPENLGHK_1xOxidation [M3]; 1xPhospho [S4(100)]_1xOxidation [M3]; 1xPhospho [S4(100); T20(0)]	Q3B7Z2	Osbp	5	5	17.3107	17.9189	17.6148	0.0259294	0.656033	-1.52431	12Mo-KO_1Way down vs WT	-2.17688	-1.06737	-0.60816	Q3B7Z2	GDMSDEDDENEFFDAPEIITMPENLGHK	1xOxidation [M3]; 1xPhospho [S4(100)]	1xOxidation [M3]; 1xPhospho [S4(100); T20(0)]	NP_001028346	0.00023818	0	Osbp	oxysterol binding protein	76303	Osbp	19 A|19 8.58 cM	protein-coding	-2σ	17.9569	18.3	18.2899	17.3091	17.7386	17.1179	17.6658	17.5523	17.1431	17.0746
2297	227	Q3UJU9_SHSLPNSLDYAQASER_1xDeamidated [N/Q]; 1xPhospho [S3(99)]_1xDeamidated [N6; Q12]; 1xPhospho [S1(1); S3(99); S7(0); Y10(0); S14(0)]	Q3UJU9	Rmdn3	5	5	18.0039	18.7437	18.3738	0.0259901	0.598795	-1.67002	12Mo-KO_1Way down vs WT	-2.57692	-1.08229	-0.739865	Q3UJU9	SHSLPNSLDYAQASER	1xDeamidated [N/Q]; 1xPhospho [S3(99)]	1xDeamidated [N6; Q12]; 1xPhospho [S1(1); S3(99); S7(0); Y10(0); S14(0)]	NP_001028308	0.000127724	0	Rmdn3	regulator of microtubule dynamics 3	67809	Rmdn3	2|2 E5	protein-coding	-2σ	19.129	19.1681	18.6489	18.3342	18.4385	18.6618	17.3935	18.0369	17.7837	18.1435
699	228	Q9WV69_KGAEEEEEEEDDDSEEEIK_1xPhospho [S14(100)]_1xPhospho [S14(100)]	Q9WV69	Dmtn	5	5	17.9553	16.3819	17.1686	0.0260241	2.97611	2.97611	12Mo-KO_1Way up vs WT	1.1828	7.48837	1.57343	Q9WV69	KGAEEEEEEEDDDSEEEIK	1xPhospho [S14(100)]	1xPhospho [S14(100)]	NP_001239591	0.00162753	0	Dmtn	dematin actin binding protein	13829	Dmtn	14 D2|14 36.32 cM	protein-coding	+3σ	15.0442	17.6488	15.7985	15.7096	17.7084	17.7472	18.2969	17.5011	18.5037	17.7278
2685	229	Q60598_KQTPPASPSPQPIEDRPPSSPIYEDAAPFK_1xDeamidated [Q11]; 2xPhospho [S7(81.2); S9(83.1)]_1xDeamidated [Q2; Q11]; 2xPhospho [T3(3.2); S7(81.2); S9(83.1); S19(16.3); S20(16.3); Y23(0)]	Q60598	Cttn	5	5	18.9691	19.364	19.1666	0.0264094	0.76059	-1.31477	12Mo-KO_1Way down vs WT	-1.65866	-1.04218	-0.39481	Q60598	KQTPPASPSPQPIEDRPPSSPIYEDAAPFK	1xDeamidated [Q11]; 2xPhospho [S7(81.2); S9(83.1)]	1xDeamidated [Q2; Q11]; 2xPhospho [T3(3.2); S7(81.2); S9(83.1); S19(16.3); S20(16.3); Y23(0)]	NP_031829	0.0021042	0	Cttn	cortactin	13043	Cttn	7|7 F5	protein-coding	-1σ	19.2811	19.5402	19.2293	19.6534	19.1158	18.9936	18.6643	19.2699	19.0951	18.8229
473	230	E9QLJ0_MNSEEPASMILPVESK_1xDeamidated [N2]; 1xPhospho [S3(100)]_1xDeamidated [N2]; 1xPhospho [S3(100); S8(0); S15(0)]	E9QLJ0	Cmya5	5	5	17.7679	17.0642	17.416	0.026508	1.62869	1.62869	12Mo-KO_1Way up vs WT	1.07603	2.46522	0.703715	E9QLJ0	MNSEEPASMILPVESK	1xDeamidated [N2]; 1xPhospho [S3(100)]	1xDeamidated [N2]; 1xPhospho [S3(100); S8(0); S15(0)]	NP_076310	7.46151e-05	0	Cmya5	cardiomyopathy associated 5	76469	Cmya5	13|13 C3	protein-coding	+2σ	17.3988	17.3938	17.3861	16.0875	17.0547	17.7013	17.751	17.6762	17.9937	17.7173
2019	231	Q9CQ73_RLEISPDSSPER_2xPhospho [S5(100); S8(90.9)]_2xPhospho [S5(100); S8(90.9); S9(9.1)]	Q9CQ73	Pkp2	5	5	16.2511	15.5297	15.8904	0.026652	1.64874	1.64874	12Mo-KO_1Way up vs WT	1.07741	2.52302	0.721361	Q9CQ73	RLEISPDSSPER	2xPhospho [S5(100); S8(90.9)]	2xPhospho [S5(100); S8(90.9); S9(9.1)]	NP_080439	0.0370529	0.00049971	Pkp2	plakophilin 2	67451	Pkp2	16|16 A2	protein-coding	+2σ	15.6643	15.4343	15.3448	15.6347	15.5705	15.4258	16.1475	16.1746	17.018	16.4896
698	232	A2A9M4_SLSNSNPDISGTPTSPDDEVR_1xDeamidated [N]; 1xPhospho [S/T]_1xDeamidated [N4; N6]; 1xPhospho [S1(46.3); S3(7.4); S5(46.3); S10(0); T12(0); T14(0); S15(0)]	A2A9M4	---	5	5	15.4676	16.1024	15.785	0.0271807	0.644058	-1.55266	12Mo-KO_1Way down vs WT	-2.26163	-1.06593	-0.634737	A2A9M4	SLSNSNPDISGTPTSPDDEVR	1xDeamidated [N]; 1xPhospho [S/T]	1xDeamidated [N4; N6]; 1xPhospho [S1(46.3); S3(7.4); S5(46.3); S10(0); T12(0); T14(0); S15(0)]	---	0.00152267	0	Dock7	dedicator of cytokinesis 7	67299	Dock7	4 C6|4 45.6 cM	protein-coding	-2σ	16.1675	16.1698	15.8376	16.6121	15.7249	15.2474	15.5921	15.3943	15.0313	16.0731
2311	233	S4R221_ATTPPNQGRPDSPVYANLQELK_2xPhospho [S12(93.6); T/Y]_2xPhospho [T2(53); T3(52.8); S12(93.6); Y15(0.6)]	S4R221	---	5	5	18.6019	19.0176	18.8098	0.0272587	0.749622	-1.33401	12Mo-KO_1Way down vs WT	-1.70697	-1.04253	-0.415764	S4R221	ATTPPNQGRPDSPVYANLQELK	2xPhospho [S12(93.6); T/Y]	2xPhospho [T2(53); T3(52.8); S12(93.6); Y15(0.6)]	---	0.119441	0.00324389	Arhgap12	Rho GTPase activating protein 12	75415	Arhgap12	18|18 A1	protein-coding	-1σ	19.2792	19.2026	18.9977	18.6188	18.99	18.5463	18.3214	18.566	18.6137	18.962
905	234	P54731_SPMMPENAENEGDALLQFTAEFSSR_1xDeamidated [N]; 1xPhospho [S1(100)]_1xDeamidated [N7; N10]; 1xPhospho [S1(100); T19(0); S23(0); S24(0)]	P54731	Faf1	5	5	15.0362	14.2343	14.6352	0.0276867	1.74351	1.74351	12Mo-KO_1Way up vs WT	1.08173	2.81014	0.801993	P54731	SPMMPENAENEGDALLQFTAEFSSR	1xDeamidated [N]; 1xPhospho [S1(100)]	1xDeamidated [N7; N10]; 1xPhospho [S1(100); T19(0); S23(0); S24(0)]	NP_032009	0.053915	0.00104129	Faf1	Fas-associated factor 1	14084	Faf1	4 C7|4 51.33 cM	protein-coding	+2σ	14.1719	14.9871	14.6248	14.087	13.3005	14.7269	15.0859	14.9475	15.203	15.2179
2774	235	A0A1B0GS91_RGSLELGNPSAAHLGDELK_1xDeamidated [N8]; 1xPhospho [S3(100)]_1xDeamidated [N8]; 1xPhospho [S3(100); S10(0)]	A0A1B0GS91	---	5	5	16.204	16.9403	16.5722	0.0278205	0.600283	-1.66588	12Mo-KO_1Way down vs WT	-2.58335	-1.07425	-0.736286	A0A1B0GS91	RGSLELGNPSAAHLGDELK	1xDeamidated [N8]; 1xPhospho [S3(100)]	1xDeamidated [N8]; 1xPhospho [S3(100); S10(0)]	---	6.32022e-07	0	Svil	supervillin	225115	Svil	18|18 A1	protein-coding	-2σ	17.1036	16.805	17.2302	17.4903	16.0723	16.2521	16.5607	16.2543	16.1841	15.7687
1264	236	Q8BNW9_SGSRPQSPSGDAESR_1xPhospho [S7(87.9)]_1xPhospho [S1(0); S3(0); S7(87.9); S9(12.1); S14(0)]	Q8BNW9	Kbtbd11	5	5	14.8695	15.329	15.0992	0.0280844	0.727225	-1.37509	12Mo-KO_1Way down vs WT	-1.80934	-1.04506	-0.459526	Q8BNW9	SGSRPQSPSGDAESR	1xPhospho [S7(87.9)]	1xPhospho [S1(0); S3(0); S7(87.9); S9(12.1); S14(0)]	NP_083392	0.128992	0.00337228	Kbtbd11	kelch repeat and BTB (POZ) domain containing 11	74901	Kbtbd11	8|8 A1.1	protein-coding	-1σ	15.3801	15.6864	15.2311	15.0871	15.2604	14.5883	14.7017	15.3251	15.0554	14.6769
2938	237	E9Q0S6_EAFEEMEGTSPSSPPHSVAR_1xPhospho [S/T]_1xPhospho [T9(0); S10(0); S12(0.2); S13(49.9); S17(49.9)]	E9Q0S6	Tns1	5	5	19.1919	18.737	18.9644	0.0281574	1.3707	1.3707	12Mo-KO_1Way up vs WT	1.04442	1.79891	0.454912	E9Q0S6	EAFEEMEGTSPSSPPHSVAR	1xPhospho [S/T]	1xPhospho [T9(0); S10(0); S12(0.2); S13(49.9); S17(49.9)]	NP_082160	0.00160447	0	Tns1	tensin 1	21961	Tns1	1 C3|1 38.17 cM	protein-coding	+1σ	18.9119	18.4857	18.7923	18.9747	18.5203	19.2929	18.9229	19.6816	18.9855	19.0766
1046	238	Q8VCE2_GNASPVLDPSDLILTR_1xPhospho [S4(100)]_1xPhospho [S4(100); S10(0); T15(0)]	Q8VCE2	Gpn1	5	5	16.448	17.0022	16.7251	0.0284877	0.681075	-1.46827	12Mo-KO_1Way down vs WT	-2.04656	-1.05338	-0.554115	Q8VCE2	GNASPVLDPSDLILTR	1xPhospho [S4(100)]	1xPhospho [S4(100); S10(0); T15(0)]	NP_598517	0.0242638	0.000280731	Gpn1	GPN-loop GTPase 1	74254	Gpn1	5|5 B1	protein-coding	-2σ	17.2634	16.8301	16.975	17.4058	16.5365	16.4623	16.4876	16.8335	15.9657	16.4911
2395	239	Q8CH25_DVQDAIAQSPEK_1xPhospho [S9(100)]_1xPhospho [S9(100)]	Q8CH25	Sltm	5	5	19.2304	19.3961	19.3133	0.0285857	0.891531	-1.12167	12Mo-KO_1Way down vs WT	-1.23883	-1.01558	-0.165643	Q8CH25	DVQDAIAQSPEK	1xPhospho [S9(100)]	1xPhospho [S9(100)]	NP_079966	0.0120007	0	Sltm	SAFB-like, transcription modulator	66660	Sltm	9|9 D	protein-coding	-0.5σ	19.3142	19.3455	19.4276	19.4303	19.4628	19.0934	19.2319	19.1721	19.4284	19.2265
1603	240	Q9QVP4_GSSNVFSMFEQAQIQEFK_1xDeamidated [N/Q]; 1xPhospho [S3(90.4)]_1xDeamidated [N4; Q11; Q13; Q15]; 1xPhospho [S2(9.6); S3(90.4); S7(0)]	Q9QVP4	Myl7	5	5	15.3935	16.8338	16.1136	0.0289181	0.368489	-2.71379	12Mo-KO_1Way down vs WT	-6.45367	-1.14116	-1.44031	Q9QVP4	GSSNVFSMFEQAQIQEFK	1xDeamidated [N/Q]; 1xPhospho [S3(90.4)]	1xDeamidated [N4; Q11; Q13; Q15]; 1xPhospho [S2(9.6); S3(90.4); S7(0)]	NP_075017	2.13548e-05	0	Myl7	myosin, light polypeptide 7, regulatory	17898	Myl7	11 A1|11 3.88 cM	protein-coding	-3σ	16.7618	16.8704	16.1397	17.3314	17.0658	14.8682	16.7781	15.2651	13.886	16.1701
2856	241	Q8CC35_CPSPTMSLPSSWK_1xCarbamidomethyl [C1]; 1xPhospho [S3(100)]_1xCarbamidomethyl [C1]; 1xPhospho [S3(100); T5(0); S7(0); S10(0); S11(0)]	Q8CC35	---	5	5	17.615	18.2374	17.9262	0.029068	0.649585	-1.53944	12Mo-KO_1Way down vs WT	-2.2395	-1.05822	-0.62241	Q8CC35	CPSPTMSLPSSWK	1xCarbamidomethyl [C1]; 1xPhospho [S3(100)]	1xCarbamidomethyl [C1]; 1xPhospho [S3(100); T5(0); S7(0); S10(0); S11(0)]	---	0.00425441	0	Synpo	synaptopodin	104027	Synpo	18|18 D3- E1	protein-coding	-2σ	18.2621	18.195	17.8201	18.284	18.6258	18.0023	17.729	17.9732	17.419	16.9513
2204	242	Q7TSC1_SETPPVPPPPPYLANYPGFPENGTPGPPISR_2xDeamidated [N15; N22]; 1xPhospho [S1(83.9)]_2xDeamidated [N15; N22]; 1xPhospho [S1(83.9); T3(16.1); Y12(0); Y16(0); T24(0); S30(0)]	Q7TSC1	Prrc2a	5	5	17.6691	18.1262	17.8976	0.0292082	0.728449	-1.37278	12Mo-KO_1Way down vs WT	-1.80839	-1.0421	-0.457101	Q7TSC1	SETPPVPPPPPYLANYPGFPENGTPGPPISR	2xDeamidated [N15; N22]; 1xPhospho [S1(83.9)]	2xDeamidated [N15; N22]; 1xPhospho [S1(83.9); T3(16.1); Y12(0); Y16(0); T24(0); S30(0)]	NP_001185973	0.00856104	0	Prrc2a	proline-rich coiled-coil 2A	53761	Prrc2a	17 B1|17 18.59 cM	protein-coding	-1σ	18.0886	18.431	17.925	18.3276	17.8587	17.488	17.7953	17.8808	17.9383	17.2429
719	243	E9Q557_SSSLSDPLEESSPIAAIFDTENLEK_1xPhospho [S/T]_1xPhospho [S1(47.4); S2(47.4); S3(5.3); S5(0); S11(0); S12(0); T20(0)]	E9Q557	Dsp	5	5	23.0914	23.3681	23.2297	0.0295563	0.825477	-1.21142	12Mo-KO_1Way down vs WT	-1.43205	-1.02478	-0.2767	E9Q557	SSSLSDPLEESSPIAAIFDTENLEK	1xPhospho [S/T]	1xPhospho [S1(47.4); S2(47.4); S3(5.3); S5(0); S11(0); S12(0); T20(0)]	NP_076331	0.000714707	0	Dsp	desmoplakin	109620	Dsp	13|13 A3.3	protein-coding	-1σ	23.5934	23.1278	23.2396	23.5313	23.3483	23.1056	22.9394	23.2775	23.1305	23.004
120	244	E9Q616_GHYEVTGSDDEAGK_1xPhospho [T/S/Y]_1xPhospho [Y3(0); T6(50); S8(50)]	E9Q616	Ahnak	5	5	20.8113	20.2922	20.5517	0.0302874	1.43312	1.43312	12Mo-KO_1Way up vs WT	1.04504	1.96533	0.519164	E9Q616	GHYEVTGSDDEAGK	1xPhospho [T/S/Y]	1xPhospho [Y3(0); T6(50); S8(50)]	NP_033773	0.00486054	0	Ahnak	AHNAK nucleoprotein (desmoyokin)	66395	Ahnak	19|19 A	protein-coding	+1σ	19.8098	20.5225	20.1031	20.5705	20.4549	20.3843	21.0804	20.6194	20.9515	21.0212
913	245	A6X940_LDDQSEDEALELEGPLIMPGSGTDVLYIGPLK_1xPhospho [S5(100)]_1xPhospho [S5(100); S21(0); T23(0); Y27(0)]	A6X940	---	5	5	15.9373	15.4094	15.6733	0.0303118	1.44177	1.44177	12Mo-KO_1Way up vs WT	1.04574	1.98778	0.527842	A6X940	LDDQSEDEALELEGPLIMPGSGTDVLYIGPLK	1xPhospho [S5(100)]	1xPhospho [S5(100); S21(0); T23(0); Y27(0)]	---	0.00524492	0	Fermt2	fermitin family member 2	218952	Fermt2	14|14 C1	protein-coding	+1σ	15.3448	15.2544	15.6948	14.8068	15.9464	15.9529	15.9657	16.0771	15.9114	15.7793
1117	246	Q60668_IDASKNEEDEGHSNSSPR_1xDeamidated [N]; 1xPhospho [S16(92.3)]_1xDeamidated [N6; N14]; 1xPhospho [S4(0); S13(0); S15(7.7); S16(92.3)]	Q60668	Hnrnpd	5	5	15.6621	16.1748	15.9184	0.0304824	0.700909	-1.42672	12Mo-KO_1Way down vs WT	-1.94983	-1.04395	-0.5127	Q60668	IDASKNEEDEGHSNSSPR	1xDeamidated [N]; 1xPhospho [S16(92.3)]	1xDeamidated [N6; N14]; 1xPhospho [S4(0); S13(0); S15(7.7); S16(92.3)]	NP_001070733	0.00050503	0	Hnrnpd	heterogeneous nuclear ribonucleoprotein D	11991	Hnrnpd	5|5 E4	protein-coding	-1σ	15.9293	15.9483	16.4583	15.9861	16.5517	15.5405	15.4611	15.8234	15.3553	16.13
1047	247	Q6IR34_APSSDEECFFDLLSK_1xCarbamidomethyl [C8]; 1xPhospho [S]_1xCarbamidomethyl [C8]; 1xPhospho [S3(50); S4(50); S14(0)]	Q6IR34	Gpsm1	5	5	15.7366	16.1887	15.9627	0.0305569	0.730977	-1.36803	12Mo-KO_1Way down vs WT	-1.80215	-1.03849	-0.452101	Q6IR34	APSSDEECFFDLLSK	1xCarbamidomethyl [C8]; 1xPhospho [S]	1xCarbamidomethyl [C8]; 1xPhospho [S3(50); S4(50); S14(0)]	NP_001186075	0.0392292	0.00049971	Gpsm1	G-protein signalling modulator 1 (AGS3-like, C. elegans)	67839	Gpsm1	2|2 A3	protein-coding	-1σ	16.0374	16.0262	16.0812	16.6037	16.1951	15.2527	15.7015	15.7656	16.0331	15.9301
2189	248	Q3UM45_HGGGGIVANLSEQSLKDGVDR_2xPhospho [S11(100); S14(100)]_2xPhospho [S11(100); S14(100)]	Q3UM45	Ppp1r7	5	5	15.3623	16.4402	15.9012	0.0306541	0.473742	-2.11086	12Mo-KO_1Way down vs WT	-4.07418	-1.09365	-1.07783	Q3UM45	HGGGGIVANLSEQSLKDGVDR	2xPhospho [S11(100); S14(100)]	2xPhospho [S11(100); S14(100)]	NP_075689	0.11105	0.00309639	Ppp1r7	protein phosphatase 1, regulatory subunit 7	66385	Ppp1r7	1|1 D	protein-coding	-2σ	15.4989	16.9274	17.0334	16.845	15.8961	14.9383	14.7777	16.3175	15.474	15.3042
181	249	Q9QYC0_EKSPPDQSAVPNTPPSTPVKLEEDLPQEPTSR_2xPhospho [T13(97.1); S/T]_2xPhospho [S3(0); S8(0.1); T13(97.1); S16(51.4); T17(51.4); T30(0); S31(0)]	Q9QYC0	Add1	5	5	17.6992	18.6031	18.1512	0.0307656	0.534438	-1.87112	12Mo-KO_1Way down vs WT	-3.2495	-1.07743	-0.903906	Q9QYC0	EKSPPDQSAVPNTPPSTPVKLEEDLPQEPTSR	2xPhospho [T13(97.1); S/T]	2xPhospho [S3(0); S8(0.1); T13(97.1); S16(51.4); T17(51.4); T30(0); S31(0)]	NP_001019629	0.00631407	0	Add1	adducin 1 (alpha)	11518	Add1	5 B2|5 17.9 cM	protein-coding	-2σ	19.0861	18.4266	18.836	18.6606	18.006	17.1987	17.6962	18.5354	18.1249	16.9406
1908	250	A0A0R4J0J0_MELSPSRASPGK_2xPhospho [S4(100); S9(100)]_2xPhospho [S4(100); S6(0); S9(100)]	A0A0R4J0J0	Palmd	5	5	20.1794	20.5488	20.3641	0.0311382	0.774098	-1.29183	12Mo-KO_1Way down vs WT	-1.6198	-1.03026	-0.369412	A0A0R4J0J0	MELSPSRASPGK	2xPhospho [S4(100); S9(100)]	2xPhospho [S4(100); S6(0); S9(100)]	NP_075734	0.0874079	0.00215274	Palmd	palmdelphin	114301	Palmd	3 G1|3 50.49 cM	protein-coding	-1σ	20.6041	20.1767	20.532	20.7321	20.6992	20.4073	20.3095	19.9707	20.3036	19.9058
484	251	E9QLJ0_DEVLTDPSLASPVEHPGLK_1xPhospho [S11(100)]_1xPhospho [T5(0); S8(0); S11(100)]	E9QLJ0	Cmya5	5	5	16.5545	15.8062	16.1804	0.0312246	1.67981	1.67981	12Mo-KO_1Way up vs WT	1.06191	2.65724	0.748297	E9QLJ0	DEVLTDPSLASPVEHPGLK	1xPhospho [S11(100)]	1xPhospho [T5(0); S8(0); S11(100)]	NP_076310	0.109039	0.00295964	Cmya5	cardiomyopathy associated 5	76469	Cmya5	13|13 C3	protein-coding	+2σ	15.7673	15.5878	15.5795	15.4892	16.6072	16.9106	16.4349	16.8122	15.8205	16.7943
1907	252	A0A0R4J0J0_LGSPARHSPLDVPVAGDGTEDPSLTALR_2xPhospho [S3(100); S8(100)]_2xPhospho [S3(100); S8(100); T19(0); S23(0); T25(0)]	A0A0R4J0J0	Palmd	5	5	16.625	17.1512	16.8881	0.0314124	0.694384	-1.44013	12Mo-KO_1Way down vs WT	-1.98913	-1.04265	-0.526195	A0A0R4J0J0	LGSPARHSPLDVPVAGDGTEDPSLTALR	2xPhospho [S3(100); S8(100)]	2xPhospho [S3(100); S8(100); T19(0); S23(0); T25(0)]	NP_075734	0.0495087	0.000921163	Palmd	palmdelphin	114301	Palmd	3 G1|3 50.49 cM	protein-coding	-1σ	17.5331	17.0762	16.9508	17.6277	16.5683	16.7458	16.6851	16.6092	16.6566	16.4286
1605	253	Q9QVP4_GSSNVFSMFEQAQIQEFK_2xPhospho [S2(100); S3(100)]_2xPhospho [S2(100); S3(100); S7(0)]	Q9QVP4	Myl7	5	5	17.3415	16.2422	16.7919	0.0317814	2.14251	2.14251	12Mo-KO_1Way up vs WT	1.08904	4.21505	1.0993	Q9QVP4	GSSNVFSMFEQAQIQEFK	2xPhospho [S2(100); S3(100)]	2xPhospho [S2(100); S3(100); S7(0)]	NP_075017	2.13548e-05	0	Myl7	myosin, light polypeptide 7, regulatory	17898	Myl7	11 A1|11 3.88 cM	protein-coding	+2σ	14.9279	16.6759	15.8469	16.7971	16.963	16.9176	17.3658	16.9653	17.5523	17.9064
1889	254	G5E8A0_SFSLASSGNSPISQR_1xPhospho [S]_1xPhospho [S1(0); S3(0); S6(0); S7(0.1); S10(50); S13(50)]	G5E8A0	Osbpl11	5	5	17.9904	18.2518	18.1211	0.0325113	0.834275	-1.19865	12Mo-KO_1Way down vs WT	-1.40919	-1.01956	-0.261406	G5E8A0	SFSLASSGNSPISQR	1xPhospho [S]	1xPhospho [S1(0); S3(0); S6(0); S7(0.1); S10(50); S13(50)]	NP_789810	0.0521577	0.00104129	Osbpl11	oxysterol binding protein-like 11	106326	Osbpl11	16|16 B3	protein-coding	-0.5σ	18.3303	18.0194	18.5243	18.1501	18.2351	18.1527	17.9828	18.0539	17.9348	17.8279
393	255	Q6PHZ2_KPDGVKESTESSNTTIEDEDVK_1xDeamidated [N13]; 1xPhospho [S/T]_1xDeamidated [N13]; 1xPhospho [S8(49.9); T9(49.9); S11(0.1); S12(0.1); T14(0); T15(0)]	Q6PHZ2	Camk2d	5	5	15.9941	14.7873	15.3907	0.0325449	2.30837	2.30837	12Mo-KO_1Way up vs WT	1.09335	4.87361	1.20688	Q6PHZ2	KPDGVKESTESSNTTIEDEDVK	1xDeamidated [N13]; 1xPhospho [S/T]	1xDeamidated [N13]; 1xPhospho [S8(49.9); T9(49.9); S11(0.1); S12(0.1); T14(0); T15(0)]	NP_001020609	0.00450433	0	Camk2d	calcium/calmodulin-dependent protein kinase II, delta	108058	Camk2d	3|3 G1- G2	protein-coding	+3σ	15.1708	14.459	14.7981	15.1982	14.3103	16.1231	16.621	14.3089	16.5981	16.3195
258	256	Q9JIX8_EASSPPTHIQLQEEMEPVEGPAPPVLIQLSPPNTDAGAR_1xDeamidated [N/Q]; 2xPhospho [S30(99.4); S/T]_1xDeamidated [Q10; Q12; Q28; N33]; 2xPhospho [S3(47.4); S4(47.4); T7(5.3); S30(99.4); T34(0.6)]	Q9JIX8	Acin1	5	5	19.3609	19.6392	19.5001	0.0328771	0.824592	-1.21272	12Mo-KO_1Way down vs WT	-1.44137	-1.02034	-0.278248	Q9JIX8	EASSPPTHIQLQEEMEPVEGPAPPVLIQLSPPNTDAGAR	1xDeamidated [N/Q]; 2xPhospho [S30(99.4); S/T]	1xDeamidated [Q10; Q12; Q28; N33]; 2xPhospho [S3(47.4); S4(47.4); T7(5.3); S30(99.4); T34(0.6)]	NP_001078942	0.00115554	0	Acin1	apoptotic chromatin condensation inducer 1	56215	Acin1	14|14 C2	protein-coding	-1σ	19.8737	19.7352	19.5149	19.6496	19.4224	19.296	19.594	19.1453	19.4022	19.3672
1961	257	O88492_ATNHGVGQAILTSTESLCCETSSFSDK_2xCarbamidomethyl [C18; C19]; 1xDeamidated [Q/N]; 1xPhospho [T/S]_2xCarbamidomethyl [C18; C19]; 1xDeamidated [N3; Q8]; 1xPhospho [T2(0); T12(0); S13(1.3); T14(49.3); S16(49.3); T21(0); S22(0); S23(0); S25(0)]	O88492	Plin4	5	5	18.8316	19.1074	18.9695	0.0332077	0.825979	-1.21068	12Mo-KO_1Way down vs WT	-1.4374	-1.01973	-0.275823	O88492	ATNHGVGQAILTSTESLCCETSSFSDK	2xCarbamidomethyl [C18; C19]; 1xDeamidated [Q/N]; 1xPhospho [T/S]	2xCarbamidomethyl [C18; C19]; 1xDeamidated [N3; Q8]; 1xPhospho [T2(0); T12(0); S13(1.3); T14(49.3); S16(49.3); T21(0); S22(0); S23(0); S25(0)]	NP_065593	0.000622611	0	Plin4	perilipin 4	57435	Plin4	17|17 D	protein-coding	-1σ	19.3711	19.0305	19.1114	19.1032	18.9206	19.0238	18.8507	18.962	18.5995	18.7218
2883	258	Q9D3L3_ATWGDGGDNSPSNVVSK_1xPhospho [S10(99.4)]_1xPhospho [T2(0); S10(99.4); S12(0.7); S16(0)]	Q9D3L3	Snap23	5	5	20.6077	20.8279	20.7178	0.0335975	0.858405	-1.16495	12Mo-KO_1Way down vs WT	-1.33664	-1.01532	-0.22027	Q9D3L3	ATWGDGGDNSPSNVVSK	1xPhospho [S10(99.4)]	1xPhospho [T2(0); S10(99.4); S12(0.7); S16(0)]	NP_001171263	7.97729e-06	0	Snap23	synaptosomal-associated protein 23	20619	Snap23	2 60.37 cM|2 E5	protein-coding	-0.5σ	20.9103	21.0607	20.7512	20.7044	20.7132	20.5891	20.4966	20.5018	20.7023	20.7485
537	259	Q63918_EEGSFTEGLSEASLPSGLMEGSAEDAEK_1xPhospho [S4(97.1)]_1xPhospho [S4(97.1); T6(2.8); S10(0); S13(0); S16(0); S22(0)]	Q63918	Cavin2	5	5	19.2572	18.8687	19.063	0.0336524	1.30905	1.30905	12Mo-KO_1Way up vs WT	1.02707	1.66844	0.388515	Q63918	EEGSFTEGLSEASLPSGLMEGSAEDAEK	1xPhospho [S4(97.1)]	1xPhospho [S4(97.1); T6(2.8); S10(0); S13(0); S16(0); S22(0)]	NP_620080	0.000602221	0	Cavin2	caveolae associated 2	20324	Cavin2	1|1 C1.1	protein-coding	+1σ	19.1136	19.1468	18.6473	18.7716	18.6641	19.0836	19.4284	19.3048	18.9515	19.5178
162	260	Q61234_NSAGGTSVGWDSPPASPLQR_1xDeamidated [Q/N]; 1xPhospho [S12(100)]_1xDeamidated [N1; Q19]; 1xPhospho [S2(0); T6(0); S7(0); S12(100); S16(0)]	Q61234	---	5	5	19.8248	20.0253	19.925	0.0344698	0.870222	-1.14913	12Mo-KO_1Way down vs WT	-1.30341	-1.01311	-0.200545	Q61234	NSAGGTSVGWDSPPASPLQR	1xDeamidated [Q/N]; 1xPhospho [S12(100)]	1xDeamidated [N1; Q19]; 1xPhospho [S2(0); T6(0); S7(0); S12(100); S16(0)]	---	0.0001932	0	Snta1	syntrophin, acidic 1	20648	Snta1	2 H1|2 76.52 cM	protein-coding	-0.5σ	20.1904	19.9949	19.9601	19.9601	20.0209	19.8554	19.8394	19.9984	19.8423	19.5883
3029	261	A2ASS6_LPPVVLSTPQGTGELPSIDGAVHTQPGR_1xPhospho [S7(85.5)]_1xPhospho [S7(85.5); T8(14.4); T12(0); S17(0.1); T24(0)]	A2ASS6	---	5	5	17.4839	18.5456	18.0147	0.0346091	0.479077	-2.08735	12Mo-KO_1Way down vs WT	-4.06941	-1.07067	-1.06167	A2ASS6	LPPVVLSTPQGTGELPSIDGAVHTQPGR	1xPhospho [S7(85.5)]	1xPhospho [S7(85.5); T8(14.4); T12(0); S17(0.1); T24(0)]	---	0.000514732	0	Ttn	titin	22138	Ttn	2 C3|2 45.13 cM	protein-coding	-2σ	18.1821	17.6879	18.578	19.2451	19.035	17.6826	17.0112	17.5051	16.7171	18.5037
1780	262	P18608_QADVADQQTTELPAENGETENQSPASEEEKEAK_2xDeamidated [Q/N]; 1xPhospho [S26(99.9)]_2xDeamidated [Q1; Q7; Q8; N16; N21; Q22]; 1xPhospho [T9(0); T10(0); T19(0); S23(0.1); S26(99.9)]	P18608	Hmgn1	5	5	18.5747	18.8143	18.6945	0.0348198	0.847005	-1.18063	12Mo-KO_1Way down vs WT	-1.37289	-1.01529	-0.239557	P18608	QADVADQQTTELPAENGETENQSPASEEEKEAK	2xDeamidated [Q/N]; 1xPhospho [S26(99.9)]	2xDeamidated [Q1; Q7; Q8; N16; N21; Q22]; 1xPhospho [T9(0); T10(0); T19(0); S23(0.1); S26(99.9)]	NP_032277	0.000596519	0	Hmgn1	high mobility group nucleosomal binding domain 1	15312	Hmgn1	16 C4|16 56.83 cM	protein-coding	-0.5σ	18.9498	18.8069	18.7375	18.7073	18.8701	18.6315	18.7603	18.349	18.4074	18.7255
1761	263	A0A0R4J036_EVTKESPKEEK_1xPhospho [S6(99.9)]_1xPhospho [T3(0.1); S6(99.9)]	A0A0R4J036	Nefm	5	5	14.3497	13.2713	13.8105	0.0353997	2.11166	2.11166	12Mo-KO_1Way up vs WT	1.06766	4.17653	1.07838	A0A0R4J036	EVTKESPKEEK	1xPhospho [S6(99.9)]	1xPhospho [T3(0.1); S6(99.9)]	NP_032717	0.145599	0.00412096	Nefm	neurofilament, medium polypeptide	18040	Nefm	14|14 D1	protein-coding	+2σ	13.004	13.3005	13.7552	13.6453	12.6517	12.8784	14.4795	14.6652	14.8215	14.904
2519	264	Q9Z1Z2_IGFPETAEEELEEIASENSDSIYSSTPEVK_1xPhospho [S/T/Y]_1xPhospho [T6(0.1); S16(17.4); S19(17.4); S21(64.5); Y23(0); S24(0.5); S25(0.2); T26(0.1)]	Q9Z1Z2	Strap	5	5	15.7598	15.0835	15.4216	0.0355953	1.59805	1.59805	12Mo-KO_1Way up vs WT	1.04129	2.4525	0.676313	Q9Z1Z2	IGFPETAEEELEEIASENSDSIYSSTPEVK	1xPhospho [S/T/Y]	1xPhospho [T6(0.1); S16(17.4); S19(17.4); S21(64.5); Y23(0); S24(0.5); S25(0.2); T26(0.1)]	NP_035629	0.0285232	0.00049971	Strap	serine/threonine kinase receptor associated protein	20901	Strap	6|6 G1	protein-coding	+2σ	15.8596	15.2493	14.7412	14.4052	15.1624	15.5524	16.0731	15.8615	15.8141	15.4982
483	265	E9QLJ0_GSFSSTPELGHTSPLLLK_2xPhospho [S2(99.8); S13(83.8)]_2xPhospho [S2(99.8); S4(0.2); S5(0.1); T6(0); T12(16.2); S13(83.8)]	E9QLJ0	Cmya5	5	5	16.567	17.0707	16.8189	0.0361305	0.705287	-1.41786	12Mo-KO_1Way down vs WT	-1.95303	-1.02934	-0.503718	E9QLJ0	GSFSSTPELGHTSPLLLK	2xPhospho [S2(99.8); S13(83.8)]	2xPhospho [S2(99.8); S4(0.2); S5(0.1); T6(0); T12(16.2); S13(83.8)]	NP_076310	0.00646604	0	Cmya5	cardiomyopathy associated 5	76469	Cmya5	13|13 C3	protein-coding	-1σ	17.4088	16.4249	17.3282	17.179	17.0128	16.636	16.4247	16.2688	16.8122	16.6933
259	266	Q9JIX8_SQSPSPPPLPEDLEK_1xPhospho [S5(100)]_1xPhospho [S1(0); S3(0); S5(100)]	Q9JIX8	Acin1	5	5	18.486	18.7383	18.6121	0.0361845	0.83957	-1.19109	12Mo-KO_1Way down vs WT	-1.39837	-1.01453	-0.252278	Q9JIX8	SQSPSPPPLPEDLEK	1xPhospho [S5(100)]	1xPhospho [S1(0); S3(0); S5(100)]	NP_001078942	0.0120579	0	Acin1	apoptotic chromatin condensation inducer 1	56215	Acin1	14|14 C2	protein-coding	-0.5σ	18.7847	18.5326	18.9715	18.8087	18.5941	18.6596	18.2877	18.4663	18.4532	18.5634
2454	267	Q52KI8_RYSPSPPPK_2xPhospho [S3(100); S5(100)]_2xPhospho [Y2(0); S3(100); S5(100)]	Q52KI8	Srrm1	5	5	20.1229	19.3381	19.7305	0.0365167	1.72281	1.72281	12Mo-KO_1Way up vs WT	1.04467	2.84116	0.784762	Q52KI8	RYSPSPPPK	2xPhospho [S3(100); S5(100)]	2xPhospho [Y2(0); S3(100); S5(100)]	NP_058079	0.0648095	0.00104129	Srrm1	serine/arginine repetitive matrix 1	51796	Srrm1	4|4 D3	protein-coding	+2σ	18.3423	19.2071	19.4664	19.6378	20.037	20.0686	20.6244	20.0288	20.0686	19.824
2403	268	Q7TQ48_YQLYTGAEPTTSEFTVLMHGPK_1xPhospho [S/T/Y]_1xPhospho [Y1(0); Y4(0); T5(0.1); T10(13.2); T11(13.2); S12(70.8); T15(2.6)]	Q7TQ48	Srl	5	5	15.3479	16.1193	15.7336	0.0365795	0.585837	-1.70696	12Mo-KO_1Way down vs WT	-2.79181	-1.04367	-0.771428	Q7TQ48	YQLYTGAEPTTSEFTVLMHGPK	1xPhospho [S/T/Y]	1xPhospho [Y1(0); Y4(0); T5(0.1); T10(13.2); T11(13.2); S12(70.8); T15(2.6)]	NP_001334091	0.02392	0.000280731	Srl	sarcalumenin	106393	Srl	16|16 A1	protein-coding	-2σ	16.5497	15.4405	16.5497	15.6187	16.438	15.7751	15.4778	15.3831	14.6423	15.4611
378	269	A0A0R4J2B2_SPSGGAAGPLLTPSQSLDGSR_1xPhospho [S1(99.8)]_1xPhospho [S1(99.8); S3(0.2); T12(0); S14(0); S16(0); S20(0)]	A0A0R4J2B2	Kctd12	5	5	17.3444	17.851	17.5977	0.0366659	0.703869	-1.42072	12Mo-KO_1Way down vs WT	-1.96296	-1.02826	-0.50662	A0A0R4J2B2	SPSGGAAGPLLTPSQSLDGSR	1xPhospho [S1(99.8)]	1xPhospho [S1(99.8); S3(0.2); T12(0); S14(0); S16(0); S20(0)]	NP_808383	0.00117773	0	Kctd12	potassium channel tetramerisation domain containing 12	239217	Kctd12	14|14 E2.3	protein-coding	-1σ	18.0554	17.8419	17.7009	17.829	17.8278	17.5842	17.0615	17.9857	17.1569	16.9336
1463	270	P27546_DMSPSAETEAPLAK_1xPhospho [S3(99.9)]_1xPhospho [S3(99.9); S5(0.1); T8(0)]	P27546	Map4	5	5	20.4387	20.6755	20.5571	0.0370589	0.848583	-1.17844	12Mo-KO_1Way down vs WT	-1.3713	-1.0127	-0.236873	P27546	DMSPSAETEAPLAK	1xPhospho [S3(99.9)]	1xPhospho [S3(99.9); S5(0.1); T8(0)]	NP_001192259	0.00146581	0	Map4	microtubule-associated protein 4	17758	Map4	9 F2|9 59.83 cM	protein-coding	-0.5σ	20.7928	20.6413	20.8544	20.5187	20.5705	20.183	20.5462	20.4755	20.5744	20.4143
3197	271	Q61037_SSSSPELQTLQDILGDLGDK_1xPhospho [T9(100)]_1xPhospho [S1(0); S2(0); S3(0); S4(0); T9(100)]	Q61037	---	5	5	17.4253	17.7525	17.5889	0.0375926	0.797054	-1.25462	12Mo-KO_1Way down vs WT	-1.54807	-1.0168	-0.327251	Q61037	SSSSPELQTLQDILGDLGDK	1xPhospho [T9(100)]	1xPhospho [S1(0); S2(0); S3(0); S4(0); T9(100)]	---	0.000185103	0	Tsc2	TSC complex subunit 2	22084	Tsc2	17 A3.3|17 12.41 cM	protein-coding	-1σ	18.1235	17.6958	17.3661	17.9014	17.6756	17.3576	17.3913	17.4158	17.3926	17.569
803	272	P46935_RQISEDVDGPDNR_1xPhospho [S4(100)]_1xPhospho [S4(100)]	P46935	Nedd4	5	5	19.6991	19.0342	19.3666	0.0378761	1.58551	1.58551	12Mo-KO_1Way up vs WT	1.03357	2.43218	0.664947	P46935	RQISEDVDGPDNR	1xPhospho [S4(100)]	1xPhospho [S4(100)]	NP_035020	0.199631	0.00788275	Nedd4	neural precursor cell expressed, developmentally down-regulated 4	17999	Nedd4	9 D|9 40.08 cM	protein-coding	+2σ	19.1114	18.7498	18.1999	19.762	19.3477	19.686	19.8134	19.6054	19.686	19.7047
2903	273	B9EKI3_SVSEINSDDELPGK_1xPhospho [S7(100)]_1xPhospho [S1(0); S3(0); S7(100)]	B9EKI3	Tmf1	5	5	16.4871	16.9332	16.7101	0.0380706	0.734001	-1.3624	12Mo-KO_1Way down vs WT	-1.81614	-1.02202	-0.446145	B9EKI3	SVSEINSDDELPGK	1xPhospho [S7(100)]	1xPhospho [S1(0); S3(0); S7(100)]	NP_001074580	0.0838297	0.00198899	Tmf1	TATA element modulatory factor 1	232286	Tmf1	6|6 D3	protein-coding	-1σ	17.4628	17.0363	16.84	16.3518	16.975	16.4409	16.5459	16.4503	16.4929	16.5053
2164	274	Q9QYG0_TLSQSSESGTLPSGPPGHTMEVSC_1xCarbamidomethyl [C24]; 1xPhospho [T1(89.5)]_1xCarbamidomethyl [C24]; 1xPhospho [T1(89.5); S3(10.5); S5(0); S6(0); S8(0); T10(0); S13(0); T19(0); S23(0)]	Q9QYG0	Ndrg2	5	5	22.3356	22.6483	22.4919	0.0389933	0.805173	-1.24197	12Mo-KO_1Way down vs WT	-1.52103	-1.0141	-0.312629	Q9QYG0	TLSQSSESGTLPSGPPGHTMEVSC	1xCarbamidomethyl [C24]; 1xPhospho [T1(89.5)]	1xCarbamidomethyl [C24]; 1xPhospho [T1(89.5); S3(10.5); S5(0); S6(0); S8(0); T10(0); S13(0); T19(0); S23(0)]	NP_001139431	0.00517061	0	Ndrg2	N-myc downstream regulated gene 2	29811	Ndrg2	14|14 C2	protein-coding	-1σ	22.8656	22.3743	22.5194	22.7184	22.7637	22.3536	22.3784	22.0388	22.6059	22.3014
1232	275	B9EKS2_SSSPTNSLTQPIEMPTLSSSPTEERPTVGPGQQDNPLLK_2xPhospho [S/T]_2xPhospho [S1(65.6); S2(65.6); S3(65.6); T5(3); S7(0.2); T9(0); T16(0); S18(0); S19(0); S20(0); T22(0); T27(0)]	B9EKS2	Kdm3b	5	5	16.3975	17.1481	16.7728	0.0390245	0.594368	-1.68246	12Mo-KO_1Way down vs WT	-2.73735	-1.03409	-0.750571	B9EKS2	SSSPTNSLTQPIEMPTLSSSPTEERPTVGPGQQDNPLLK	2xPhospho [S/T]	2xPhospho [S1(65.6); S2(65.6); S3(65.6); T5(3); S7(0.2); T9(0); T16(0); S18(0); S19(0); S20(0); T22(0); T27(0)]	NP_001074725	0.194536	0.00763933	Kdm3b	KDM3B lysine (K)-specific demethylase 3B	277250	Kdm3b	18|18 B1	protein-coding	-2σ	16.6628	17.3561	17.5824	17.2022	16.9368	16.227	15.4982	16.6991	16.5412	17.0221
928	276	Q61554_GGPEPPASSEMDDNSLSPEACYECK_2xCarbamidomethyl [C21; C24]; 1xPhospho [S/Y]_2xCarbamidomethyl [C21; C24]; 1xPhospho [S8(50); S9(50); S15(0); S17(0); Y22(0)]	Q61554	Fbn1	5	5	22.3788	22.9044	22.6416	0.039134	0.694631	-1.43961	12Mo-KO_1Way down vs WT	-2.0249	-1.0235	-0.525682	Q61554	GGPEPPASSEMDDNSLSPEACYECK	2xCarbamidomethyl [C21; C24]; 1xPhospho [S/Y]	2xCarbamidomethyl [C21; C24]; 1xPhospho [S8(50); S9(50); S15(0); S17(0); Y22(0)]	NP_032019	6.68823e-05	0	Fbn1	fibrillin 1	14118	Fbn1	2 F1|2 61.38 cM	protein-coding	-1σ	23.0274	23.0808	22.7371	22.8656	22.8113	22.2261	22.4868	22.3784	23.03	21.7725
96	277	Q64010_DSSTSPGDYVLSVSENSR_1xPhospho [S3(76.8)]_1xPhospho [S2(10.8); S3(76.8); T4(10.8); S5(1.6); Y9(0); S12(0); S14(0); S17(0)]	Q64010	Crk	5	5	16.7593	17.2505	17.0049	0.0391525	0.71144	-1.4056	12Mo-KO_1Way down vs WT	-1.93337	-1.0219	-0.491186	Q64010	DSSTSPGDYVLSVSENSR	1xPhospho [S3(76.8)]	1xPhospho [S2(10.8); S3(76.8); T4(10.8); S5(1.6); Y9(0); S12(0); S14(0); S17(0)]	NP_598417	0.0676103	0.00104129	Crk	v-crk avian sarcoma virus CT10 oncogene homolog	12928	Crk	11 B5|11 45.92 cM	protein-coding	-1σ	17.5715	17.1923	16.935	17.5023	17.0513	16.2652	16.6663	17.2347	16.788	16.8424
1476	278	P27546; A0A0G2JFH2_AAVGVTGNDITTPPNKEPPPSPEKK_1xPhospho [S21(100)]_1xPhospho [T6(0); T11(0); T12(0); S21(100)]	P27546; A0A0G2JFH2	---	5	5	17.8659	18.3538	18.1099	0.0391827	0.71309	-1.40235	12Mo-KO_1Way down vs WT	-1.92484	-1.02169	-0.487844	P27546; A0A0G2JFH2	AAVGVTGNDITTPPNKEPPPSPEKK	1xPhospho [S21(100)]	1xPhospho [T6(0); T11(0); T12(0); S21(100)]	---	0.0427338	0.000921163	Map4	microtubule-associated protein 4	17758	Map4	9 F2|9 59.83 cM	protein-coding	-1σ	18.4102	18.1255	18.2142	18.4838	18.535	18.4316	17.3195	17.9555	17.6929	17.93
1782	279	P18608_QADVADQQTTELPAENGETENQSPASEEEKEAK_1xPhospho [S26(99.5)]_1xPhospho [T9(0); T10(0); T19(0); S23(0.5); S26(99.5)]	P18608	Hmgn1	5	5	18.4435	17.192	17.8178	0.0393207	2.38085	2.38085	12Mo-KO_1Way up vs WT	1.05579	5.36891	1.25148	P18608	QADVADQQTTELPAENGETENQSPASEEEKEAK	1xPhospho [S26(99.5)]	1xPhospho [T9(0); T10(0); T19(0); S23(0.5); S26(99.5)]	NP_032277	0.000596519	0	Hmgn1	high mobility group nucleosomal binding domain 1	15312	Hmgn1	16 C4|16 56.83 cM	protein-coding	+3σ	16.8148	16.2939	19.1412	16.9484	16.7618	18.0928	18.5276	18.5208	18.4168	18.6596
2133	280	Q8C1D8_LSSTGGQTPR_1xPhospho [S3(98.9)]_1xPhospho [S2(0.1); S3(98.9); T4(1); T8(0)]	Q8C1D8	Iws1	5	5	14.113	14.8121	14.4626	0.039582	0.615949	-1.62351	12Mo-KO_1Way down vs WT	-2.55905	-1.02998	-0.699116	Q8C1D8	LSSTGGQTPR	1xPhospho [S3(98.9)]	1xPhospho [S2(0.1); S3(98.9); T4(1); T8(0)]	NP_775617	0.134931	0.00385156	Iws1	IWS1, SUPT6 interacting protein	73473	Iws1	18|18 B1	protein-coding	-2σ	14.9974	14.8473	14.6787	14.7574	14.7796	13.886	14.5647	14.9255	13.3602	13.8284
645	281	Q3UMF0_DPDSALGISDGETSPSSK_1xPhospho [S/T]_1xPhospho [S4(0); S9(0.1); T13(10.8); S14(67.6); S16(10.8); S17(10.8)]	Q3UMF0	Cobll1	5	5	16.065	16.4784	16.2717	0.0397393	0.750839	-1.33184	12Mo-KO_1Way down vs WT	-1.74357	-1.01734	-0.413424	Q3UMF0	DPDSALGISDGETSPSSK	1xPhospho [S/T]	1xPhospho [S4(0); S9(0.1); T13(10.8); S14(67.6); S16(10.8); S17(10.8)]	NP_081501	0.131932	0.00353173	Cobll1	Cobl-like 1	319876	Cobll1	2|2 C1.3	protein-coding	-1σ	16.2201	16.5416	16.6004	16.867	16.1629	15.9684	15.975	15.7793	16.4043	16.1979
2518	282	Q9Z1Z2_IGFPETAEEELEEIASENSDSIYSSTPEVK_1xDeamidated [N18]; 1xPhospho [S16(75.8)]_1xDeamidated [N18]; 1xPhospho [T6(0); S16(75.8); S19(18.8); S21(4.9); Y23(0.1); S24(0.4); S25(0); T26(0)]	Q9Z1Z2	Strap	5	5	16.818	16.1246	16.4713	0.0398934	1.61718	1.61718	12Mo-KO_1Way up vs WT	1.02879	2.54208	0.693476	Q9Z1Z2	IGFPETAEEELEEIASENSDSIYSSTPEVK	1xDeamidated [N18]; 1xPhospho [S16(75.8)]	1xDeamidated [N18]; 1xPhospho [T6(0); S16(75.8); S19(18.8); S21(4.9); Y23(0.1); S24(0.4); S25(0); T26(0)]	NP_035629	0.0285232	0.00049971	Strap	serine/threonine kinase receptor associated protein	20901	Strap	6|6 G1	protein-coding	+2σ	16.9542	16.0745	16.0374	16.1721	15.3846	16.6909	16.7718	16.4896	17.2938	16.844
316	283	A0A087WP33_RESDESGESAPEEGGEGAR_1xPhospho [S3(100)]_1xPhospho [S3(100); S6(0); S9(0)]	A0A087WP33	---	5	5	16.5273	16.8488	16.6881	0.0402018	0.8002	-1.24969	12Mo-KO_1Way down vs WT	-1.54196	-1.01282	-0.321568	A0A087WP33	RESDESGESAPEEGGEGAR	1xPhospho [S3(100)]	1xPhospho [S3(100); S6(0); S9(0)]	---	8.48411e-05	0	Atg9a	autophagy related 9A	245860	Atg9a	1|1 C4	protein-coding	-1σ	17.1762	16.7744	16.6203	17.0593	16.614	16.6113	16.6952	16.3955	16.5708	16.3635
2054	284	P60335_VMTIPYQPMPASSPVICAGGQDR_1xCarbamidomethyl [C17]; 1xDeamidated [Q7]; 1xPhospho [S12(98.4)]_1xCarbamidomethyl [C17]; 1xDeamidated [Q7; Q21]; 1xPhospho [T3(0); Y6(0); S12(98.4); S13(1.7)]	P60335	Pcbp1	5	5	17.1084	16.3389	16.7236	0.0406883	1.70467	1.70467	12Mo-KO_1Way up vs WT	1.02931	2.82315	0.769489	P60335	VMTIPYQPMPASSPVICAGGQDR	1xCarbamidomethyl [C17]; 1xDeamidated [Q7]; 1xPhospho [S12(98.4)]	1xCarbamidomethyl [C17]; 1xDeamidated [Q7; Q21]; 1xPhospho [T3(0); Y6(0); S12(98.4); S13(1.7)]	NP_035995	0.014585	0	Pcbp1	poly(rC) binding protein 1	23983	Pcbp1	6|6 D1	protein-coding	+2σ	16.6216	15.3954	16.4605	16.3449	16.8723	17.3391	16.5721	17.4207	16.728	17.4821
2188	285	Q3UM45_GAGQQQSQEMMEVDR_1xPhospho [S7(100)]_1xPhospho [S7(100)]	Q3UM45	Ppp1r7	5	5	16.2044	16.7206	16.4625	0.0407564	0.699235	-1.43013	12Mo-KO_1Way down vs WT	-2.00633	-1.01941	-0.51615	Q3UM45	GAGQQQSQEMMEVDR	1xPhospho [S7(100)]	1xPhospho [S7(100)]	NP_075689	0.0307789	0.00049971	Ppp1r7	protein phosphatase 1, regulatory subunit 7	66385	Ppp1r7	1|1 D	protein-coding	-1σ	16.8097	16.5825	16.6216	17.2953	16.2939	16.0936	15.7602	16.3449	16.5396	16.284
3115	286	E9PWG2_SNSLEDEEGR_1xPhospho [S3(97.9)]_1xPhospho [S1(2.1); S3(97.9)]	E9PWG2	Trappc8	5	5	17.1896	16.8969	17.0433	0.0408716	1.22493	1.22493	12Mo-KO_1Way up vs WT	1.01082	1.48439	0.292696	E9PWG2	SNSLEDEEGR	1xPhospho [S3(97.9)]	1xPhospho [S1(2.1); S3(97.9)]	NP_796012	0.101794	0.00244569	Trappc8	trafficking protein particle complex 8	75964	Trappc8	18|18 A2	protein-coding	+1σ	16.711	17.1489	16.8638	17.0961	16.6647	17.2671	17.2854	17.0746	16.9786	17.3423
2825	287	B2RQK7_AQSAPPEAAVLPLSPLSVPAVSPTPFFPDGGAPIPAPSIFNR_1xDeamidated [N/Q]; 1xPhospho [S3(100)]_1xDeamidated [Q2; N41]; 1xPhospho [S3(100); S14(0); S17(0); S22(0); T24(0); S38(0)]	B2RQK7	Synpo2l	5	5	15.3554	16.3567	15.856	0.0409534	0.499545	-2.00182	12Mo-KO_1Way down vs WT	-3.86378	-1.03714	-1.00131	B2RQK7	AQSAPPEAAVLPLSPLSVPAVSPTPFFPDGGAPIPAPSIFNR	1xDeamidated [N/Q]; 1xPhospho [S3(100)]	1xDeamidated [Q2; N41]; 1xPhospho [S3(100); S14(0); S17(0); S22(0); T24(0); S38(0)]	NP_001297360	0.000202612	0	Synpo2l	synaptopodin 2-like	68760	Synpo2l	14|14 A3	protein-coding	-2σ	17.0193	16.7513	15.8341	16.0812	16.0975	14.4433	15.9556	14.5999	15.745	16.0331
2591	288	F8WIJ0_TLMMEQR_1xPhospho [T1(100)]_1xPhospho [T1(100)]	F8WIJ0	Slc12a4	5	5	17.3012	16.6765	16.9888	0.0412991	1.54189	1.54189	12Mo-KO_1Way up vs WT	1.02208	2.32608	0.624704	F8WIJ0	TLMMEQR	1xPhospho [T1(100)]	1xPhospho [T1(100)]	NP_001240733	0.147559	0.00427545	Slc12a4	solute carrier family 12, member 4	20498	Slc12a4	8 D3|8 53.06 cM	protein-coding	+2σ	17.1162	16.2751	16.3088	16.6628	17.0193	17.1324	18.0146	16.9065	17.1504	17.3019
2966	289	Q8CGB6_LSPGEALPSVVQGVAEK_1xPhospho [S2(100)]_1xPhospho [S2(100); S9(0)]	Q8CGB6	Tns2	5	5	18.6091	18.9347	18.7719	0.0416321	0.797992	-1.25315	12Mo-KO_1Way down vs WT	-1.55331	-1.01099	-0.325555	Q8CGB6	LSPGEALPSVVQGVAEK	1xPhospho [S2(100)]	1xPhospho [S2(100); S9(0)]	NP_705761	0.00711142	0	Tns2	tensin 2	209039	Tns2	15 F2|15 57.29 cM	protein-coding	-1σ	19.3299	18.9101	18.7825	19.0102	18.6406	18.5512	18.6035	18.7114	18.3971	18.7823
980	290	P23242_MGQAGSTISNSHAQPFDFPDDSQNAK_2xDeamidated [N/Q]; 2xPhospho [S6(98.8); T7(98.8)]_2xDeamidated [Q3; N10; Q14; Q23; N24]; 2xPhospho [S6(98.8); T7(98.8); S9(2.2); S11(0.3); S22(0)]	P23242	Gja1	5	5	19.85	16.811	18.3305	0.0417183	8.21942	8.21942	12Mo-KO_1Way up vs WT	1.10617	61.0747	3.03904	P23242	MGQAGSTISNSHAQPFDFPDDSQNAK	2xDeamidated [N/Q]; 2xPhospho [S6(98.8); T7(98.8)]	2xDeamidated [Q3; N10; Q14; Q23; N24]; 2xPhospho [S6(98.8); T7(98.8); S9(2.2); S11(0.3); S22(0)]	NP_034418	0.000266985	0	Gja1	gap junction protein, alpha 1	14609	Gja1	10 B4|10 28.64 cM	protein-coding	+6σ	15.6396	15.5456	16.2308	16.0723	20.5666	20.3747	16.5883	21.0317	20.6901	20.5654
366	291	Q9ES83_GSSSTASLPMSSPQQR_1xPhospho [S12(90.7)]_1xPhospho [S2(0); S3(0); S4(0); T5(0); S7(0); S11(9.3); S12(90.7)]	Q9ES83	Bves	5	5	21.6475	21.9316	21.7895	0.0418028	0.821276	-1.21762	12Mo-KO_1Way down vs WT	-1.46882	-1.00937	-0.284061	Q9ES83	GSSSTASLPMSSPQQR	1xPhospho [S12(90.7)]	1xPhospho [S2(0); S3(0); S4(0); T5(0); S7(0); S11(9.3); S12(90.7)]	NP_077247	0.14625	0.00427545	Bves	blood vessel epicardial substance	23828	Bves	10 B2|10 23.47 cM	protein-coding	-1σ	22.0444	21.887	21.9613	22.1059	21.6594	21.6998	21.3501	21.8982	21.6695	21.6201
2388	292	E9Q401_RISQTSQVSIDAAHGYSPR_1xDeamidated [Q]; 1xPhospho [T5(96.9)]_1xDeamidated [Q4; Q7]; 1xPhospho [S3(1.5); T5(96.9); S6(1.5); S9(0); Y16(0); S17(0)]	E9Q401	Ryr2	5	5	16.8531	17.7738	17.3134	0.0419305	0.528273	-1.89296	12Mo-KO_1Way down vs WT	-3.47827	-1.0302	-0.920645	E9Q401	RISQTSQVSIDAAHGYSPR	1xDeamidated [Q]; 1xPhospho [T5(96.9)]	1xDeamidated [Q4; Q7]; 1xPhospho [S3(1.5); T5(96.9); S6(1.5); S9(0); Y16(0); S17(0)]	NP_076357	4.52801e-05	0	Ryr2	ryanodine receptor 2, cardiac	20191	Ryr2	13 A1|13 4.38 cM	protein-coding	-2σ	16.8328	17.2857	17.8587	18.6585	18.2332	17.6253	16.7428	16.5981	16.5582	16.7412
42	293	Q8BRK8_TSCGSPNYAAPEVISGR_1xCarbamidomethyl [C3]; 1xDeamidated [N7]; 1xPhospho [T1(88.2)]_1xCarbamidomethyl [C3]; 1xDeamidated [N7]; 1xPhospho [T1(88.2); S2(10.5); S5(1.3); Y8(0); S15(0)]	Q8BRK8	Prkaa2	5	5	16.9622	17.748	17.3551	0.0421851	0.580027	-1.72406	12Mo-KO_1Way down vs WT	-2.90027	-1.02486	-0.785809	Q8BRK8	TSCGSPNYAAPEVISGR	1xCarbamidomethyl [C3]; 1xDeamidated [N7]; 1xPhospho [T1(88.2)]	1xCarbamidomethyl [C3]; 1xDeamidated [N7]; 1xPhospho [T1(88.2); S2(10.5); S5(1.3); Y8(0); S15(0)]	NP_835279	0.000138482	0	Prkaa2	protein kinase, AMP-activated, alpha 2 catalytic subunit	108079	Prkaa2	4|4 C6	protein-coding	-2σ	17.1946	18.3037	17.2104	17.8361	18.195	17.5705	17.2326	16.5477	17.1064	16.3536
1284	294	Q61029_QNGSNDSDRYSDNDEDSKIELK_1xDeamidated [N/Q]; 1xPhospho [S7(90.2)]_1xDeamidated [Q1; N2; N5; N13]; 1xPhospho [S4(0); S7(90.2); Y10(0); S11(9.8); S17(0)]	Q61029	Tmpo	5	5	19.6133	18.3875	19.0004	0.0423764	2.3388	2.3388	12Mo-KO_1Way up vs WT	1.03804	5.26951	1.22577	Q61029	QNGSNDSDRYSDNDEDSKIELK	1xDeamidated [N/Q]; 1xPhospho [S7(90.2)]	1xDeamidated [Q1; N2; N5; N13]; 1xPhospho [S4(0); S7(90.2); Y10(0); S11(9.8); S17(0)]	NP_001073598	0.0061364	0	Tmpo	thymopoietin	21917	Tmpo	10 C2|10 45.66 cM	protein-coding	+3σ	17.707	18.5203	17.1375	18.7149	19.8579	19.7247	19.0497	19.846	20.1944	19.2516
1826	295	Q80XU3_VVDYSQFQESDDADEDYGR_1xPhospho [S10(100)]_1xPhospho [Y4(0); S5(0); S10(100); Y17(0)]	Q80XU3	Nucks1	5	5	19.8696	19.186	19.5278	0.0424961	1.60614	1.60614	12Mo-KO_1Way up vs WT	1.02069	2.5274	0.683602	Q80XU3	VVDYSQFQESDDADEDYGR	1xPhospho [S10(100)]	1xPhospho [Y4(0); S5(0); S10(100); Y17(0)]	NP_001139276	0.00486054	0	Nucks1	nuclear casein kinase and cyclin-dependent kinase substrate 1	98415	Nucks1	1|1 E4	protein-coding	+2σ	18.2126	19.2003	19.6336	19.2421	19.6415	19.8002	19.9087	19.4877	20.1568	19.9947
3345	296	Q9JKB3_SPAASGAPQAPAPAALLAGSPGGDAAPGPAPASSAPAGGEDAEK_1xPhospho [S1(78.4)]_1xPhospho [S1(78.4); S5(21.6); S20(0); S33(0); S34(0)]	Q9JKB3	Ybx3	5	5	16.9329	16.1084	16.5206	0.0425411	1.77099	1.77099	12Mo-KO_1Way up vs WT	1.02485	3.06035	0.824557	Q9JKB3	SPAASGAPQAPAPAALLAGSPGGDAAPGPAPASSAPAGGEDAEK	1xPhospho [S1(78.4)]	1xPhospho [S1(78.4); S5(21.6); S20(0); S33(0); S34(0)]	NP_035863	0.000973669	0	Ybx3	Y box protein 3	56449	Ybx3	6|6 F3	protein-coding	+2σ	16.6615	16.3987	15.0588	16.5888	15.8341	17.0462	16.8255	17.272	17.1762	16.3449
3178	297	Q8BKI2_SSSSAGSEVGGQSTGSNHK_1xPhospho [S/T]_1xPhospho [S1(33.1); S2(33.1); S3(33.1); S4(0.8); S7(0); S13(0); T14(0); S16(0)]	Q8BKI2	Tnrc6b	5	5	14.3861	14.8687	14.6274	0.0426822	0.715693	-1.39725	12Mo-KO_1Way down vs WT	-1.92499	-1.01419	-0.482588	Q8BKI2	SSSSAGSEVGGQSTGSNHK	1xPhospho [S/T]	1xPhospho [S1(33.1); S2(33.1); S3(33.1); S4(0.8); S7(0); S13(0); T14(0); S16(0)]	NP_659061	0.0210369	0.000280731	Tnrc6b	trinucleotide repeat containing 6b	213988	Tnrc6b	15|15 E1	protein-coding	-1σ	14.8473	15.0722	14.7166	14.7796	14.9279	14.5511	13.7869	14.4164	14.9475	14.2286
1449	298	P14873_SLMSSPEDLTKDFEELKAEEIDVAK_2xPhospho [S4(91.7); S5(81.9)]_2xPhospho [S1(5.5); S4(91.7); S5(81.9); T10(20.9)]	P14873	Map1b	5	5	16.5001	15.4962	15.9982	0.0426855	2.00538	2.00538	12Mo-KO_1Way up vs WT	1.02972	3.90549	1.00388	P14873	SLMSSPEDLTKDFEELKAEEIDVAK	2xPhospho [S4(91.7); S5(81.9)]	2xPhospho [S1(5.5); S4(91.7); S5(81.9); T10(20.9)]	NP_032660	0.0685695	0.00104129	Map1b	microtubule-associated protein 1B	17755	Map1b	13 D1|13 52.9 cM	protein-coding	+2σ	14.5901	16.3019	15.5279	15.0936	15.9675	15.5893	16.1879	16.7395	17.2699	16.7138
3312	299	O88427_RSSSGSVDPQLGDQK_1xPhospho [S6(80.7)]_1xPhospho [S2(9.1); S3(9.1); S4(1.1); S6(80.7)]	O88427	---	5	5	16.7607	17.2726	17.0166	0.04274	0.701294	-1.42594	12Mo-KO_1Way down vs WT	-2.00338	-1.01493	-0.511909	O88427	RSSSGSVDPQLGDQK	1xPhospho [S6(80.7)]	1xPhospho [S2(9.1); S3(9.1); S4(1.1); S6(80.7)]	---	0.191202	0.00753256	Cacna1h	calcium channel, voltage-dependent, T type, alpha 1H subunit	58226	Cacna1h	17 A3.3|17 12.53 cM	protein-coding	-1σ	17.6538	16.7951	17.0626	17.3625	17.4887	16.4581	16.5819	17.0441	17.1831	16.536
94	300	A2AVR6_SISHPESGDPPTMAEGEGYR_1xPhospho [S1(89.1)]_1xPhospho [S1(89.1); S3(10.9); S7(0); T12(0); Y19(0)]	A2AVR6	Acot11	5	5	17.6028	16.8152	17.209	0.0427832	1.72617	1.72617	12Mo-KO_1Way up vs WT	1.02292	2.91291	0.787576	A2AVR6	SISHPESGDPPTMAEGEGYR	1xPhospho [S1(89.1)]	1xPhospho [S1(89.1); S3(10.9); S7(0); T12(0); Y19(0)]	NP_001334088	0.00681339	0	Acot11	acyl-CoA thioesterase 11	329910	Acot11	4|4 C7	protein-coding	+2σ	15.6692	16.9664	17.4413	16.7765	17.2226	17.3195	17.4706	17.7769	17.5109	17.936
2538	301	F8WHU5_AESPETSAVESTQSTPQK_1xPhospho [S3(100)]_1xPhospho [S3(100); T6(0); S7(0); S11(0); T12(0); S14(0); T15(0)]	F8WHU5	---	5	5	19.8594	20.0128	19.9361	0.0432417	0.899139	-1.11218	12Mo-KO_1Way down vs WT	-1.23184	-1.00413	-0.153384	F8WHU5	AESPETSAVESTQSTPQK	1xPhospho [S3(100)]	1xPhospho [S3(100); T6(0); S7(0); S11(0); T12(0); S14(0); T15(0)]	---	0.000115033	0	Pds5b	PDS5 cohesin associated factor B	100710	Pds5b	5|5 G3	protein-coding	-0.5σ	20.0811	19.9116	20.1727	20.0177	19.8808	19.7521	19.8664	19.818	19.9461	19.9145
469	302	E9QLJ0_ETSPSPLSPEVEHR_1xPhospho [S5(100)]_1xPhospho [T2(0); S3(0); S5(100); S8(0)]	E9QLJ0	Cmya5	5	5	18.8256	17.6154	18.2205	0.0435824	2.31369	2.31369	12Mo-KO_1Way up vs WT	1.03132	5.1906	1.21019	E9QLJ0	ETSPSPLSPEVEHR	1xPhospho [S5(100)]	1xPhospho [T2(0); S3(0); S5(100); S8(0)]	NP_076310	0.0137104	0	Cmya5	cardiomyopathy associated 5	76469	Cmya5	13|13 C3	protein-coding	+3σ	15.8469	17.4088	18.1404	18.531	18.1501	19.1832	19.0725	18.2632	18.6724	18.9369
1127	303	Q8VDM6_APQQQPPPQQPPPPQPPPQQPPPPPSYSPAR_1xPhospho [S/Y]_1xPhospho [S26(50); Y27(0); S28(50)]	Q8VDM6	Hnrnpul1	5	5	17.603	18.5497	18.0764	0.0437325	0.518801	-1.92752	12Mo-KO_1Way down vs WT	-3.6289	-1.02382	-0.946747	Q8VDM6	APQQQPPPQQPPPPQPPPQQPPPPPSYSPAR	1xPhospho [S/Y]	1xPhospho [S26(50); Y27(0); S28(50)]	NP_659171	0.000718115	0	Hnrnpul1	heterogeneous nuclear ribonucleoprotein U-like 1	232989	Hnrnpul1	7|7 A3	protein-coding	-2σ	18.7037	19.1585	19.0245	18.5561	17.3059	17.4912	16.8381	18.0191	18.0453	17.6213
256	304	O35841_TSEDTSSGSPPK_1xPhospho [S9(99.4)]_1xPhospho [T1(0); S2(0); T5(0); S6(0.1); S7(0.6); S9(99.4)]	O35841	Api5	5	5	14.1075	15.3896	14.7485	0.0437412	0.411202	-2.43189	12Mo-KO_1Way down vs WT	-5.72881	-1.03235	-1.28208	O35841	TSEDTSSGSPPK	1xPhospho [S9(99.4)]	1xPhospho [T1(0); S2(0); T5(0); S6(0.1); S7(0.6); S9(99.4)]	NP_031492	0.00946042	0	Api5	apoptosis inhibitor 5	11800	Api5	2|2 E1	protein-coding	-3σ	15.5589	16.2674	15.8825	15.1912	14.048	14.7652	14.8304	14.5404	13.002	13.3996
1474	305	P27546; A0A0G2JFH2_AAEQMSTLPIDAPSPLENLEQK_1xPhospho [S14(99.9)]_1xPhospho [S6(0); T7(0.1); S14(99.9)]	P27546; A0A0G2JFH2	---	5	5	17.5961	17.8915	17.7438	0.044027	0.814847	-1.22722	12Mo-KO_1Way down vs WT	-1.49559	-1.00701	-0.295399	P27546; A0A0G2JFH2	AAEQMSTLPIDAPSPLENLEQK	1xPhospho [S14(99.9)]	1xPhospho [S6(0); T7(0.1); S14(99.9)]	---	0.0285232	0.00049971	Map4	microtubule-associated protein 4	17758	Map4	9 F2|9 59.83 cM	protein-coding	-1σ	17.6891	17.7972	17.9005	18.2288	17.8419	17.289	17.6813	17.7689	17.6813	17.5599
2961	306	E9Q0S6_HPGAHQGNLASSLHSNAVISPGSPSLGR_1xDeamidated [N/Q]; 1xPhospho [S23(97.9)]_1xDeamidated [Q6; N8; N16]; 1xPhospho [S11(0); S12(0); S15(0); S20(0); S23(97.9); S25(2.1)]	E9Q0S6	Tns1	5	5	17.2605	18.6996	17.98	0.0446963	0.368791	-2.71156	12Mo-KO_1Way down vs WT	-7.13432	-1.03059	-1.43913	E9Q0S6	HPGAHQGNLASSLHSNAVISPGSPSLGR	1xDeamidated [N/Q]; 1xPhospho [S23(97.9)]	1xDeamidated [Q6; N8; N16]; 1xPhospho [S11(0); S12(0); S15(0); S20(0); S23(97.9); S25(2.1)]	NP_082160	0.00121761	0	Tns1	tensin 1	21961	Tns1	1 C3|1 38.17 cM	protein-coding	-3σ	18.3481	18.8759	18.8319	18.9944	18.448	18.883	17.5536	16.7922	17.7654	15.3083
1503	307	Q8BK03_GDGGSTPTPGDSLQNPDTASEALSEPESQR_1xPhospho [S5(80.6)]_1xPhospho [S5(80.6); T6(16.1); T8(3.3); S12(0); T18(0); S20(0); S24(0); S28(0)]	Q8BK03	Miga2	5	5	18.6045	18.8781	18.7413	0.0448383	0.827286	-1.20877	12Mo-KO_1Way down vs WT	-1.45301	-1.00559	-0.273542	Q8BK03	GDGGSTPTPGDSLQNPDTASEALSEPESQR	1xPhospho [S5(80.6)]	1xPhospho [S5(80.6); T6(16.1); T8(3.3); S12(0); T18(0); S20(0); S24(0); S28(0)]	NP_001229336	0.00202563	0	Miga2	mitoguardin 2	108958	Miga2	2|2 B	protein-coding	-0.5σ	18.7964	19.0245	18.8885	19.0008	18.6802	18.7334	18.4752	18.6897	18.8253	18.299
2868	308	E9Q1U2_GVSSPVAGPAQPPPWPQPAPWSQPAFYDSSEQIASR_1xPhospho [S3(82.2)]_1xPhospho [S3(82.2); S4(17.8); S22(0); Y27(0); S29(0); S30(0); S35(0)]	E9Q1U2	Synpo2	5	5	21.8744	22.2305	22.0525	0.0450862	0.781278	-1.27995	12Mo-KO_1Way down vs WT	-1.62702	-1.00692	-0.356092	E9Q1U2	GVSSPVAGPAQPPPWPQPAPWSQPAFYDSSEQIASR	1xPhospho [S3(82.2)]	1xPhospho [S3(82.2); S4(17.8); S22(0); Y27(0); S29(0); S30(0); S35(0)]	NP_536699	0.00112838	0	Synpo2	synaptopodin 2	118449	Synpo2	3|3 G1	protein-coding	-1σ	22.6768	22.1059	22.0748	22.3133	21.9817	22.0157	21.5509	21.8681	21.953	21.9843
221	309	S4R2F3_GSPIVQEPEEASEPK_1xPhospho [S2(100)]_1xPhospho [S2(100); S12(0)]	S4R2F3	---	5	5	17.9831	18.6612	18.3222	0.0454598	0.625005	-1.59999	12Mo-KO_1Way down vs WT	-2.52915	-1.01218	-0.678061	S4R2F3	GSPIVQEPEEASEPK	1xPhospho [S2(100)]	1xPhospho [S2(100); S12(0)]	---	0.154264	0.00455194	Ank2	ankyrin 2, brain	109676	Ank2	3 G2|3 56.07 cM	protein-coding	-2σ	18.9944	18.6897	19.5094	17.9938	18.1186	17.9289	18.094	17.9183	17.8279	18.1464
2396	310	Q8CH25_SPGHMVILNQTK_1xPhospho [S1(100)]_1xPhospho [S1(100); T11(0)]	Q8CH25	Sltm	5	5	16.7154	16.0508	16.3831	0.0455602	1.58511	1.58511	12Mo-KO_1Way up vs WT	1.01167	2.48361	0.664585	Q8CH25	SPGHMVILNQTK	1xPhospho [S1(100)]	1xPhospho [S1(100); T11(0)]	NP_079966	0.136149	0.00396376	Sltm	SAFB-like, transcription modulator	66660	Sltm	9|9 D	protein-coding	+2σ	15.9078	15.9426	16.2145	15.9107	16.2783	15.7151	17.3279	16.7346	16.8541	16.9452
3317	311	Q6PGL7_GPVAQLSSSPVLPNGHQPLLQPR_2xDeamidated [N/Q]; 1xPhospho [S9(85.9)]_2xDeamidated [N14; Q17; Q21]; 1xPhospho [S7(0.4); S8(13.7); S9(85.9)]	Q6PGL7	Washc2	5	5	16.6439	17.085	16.8645	0.0457417	0.736542	-1.3577	12Mo-KO_1Way down vs WT	-1.82978	-1.00741	-0.441159	Q6PGL7	GPVAQLSSSPVLPNGHQPLLQPR	2xDeamidated [N/Q]; 1xPhospho [S9(85.9)]	2xDeamidated [N14; Q17; Q21]; 1xPhospho [S7(0.4); S8(13.7); S9(85.9)]	NP_080861	0.0141074	0	Washc2	WASH complex subunit 2`	28006	Washc2	6 E3|6 53.76 cM	protein-coding	-1σ	16.9051	16.8162	16.9075	17.4126	17.3838	17.1405	16.3381	16.5228	16.5493	16.6686
485	312	E9QLJ0_ELGRDSPLCLTSPSEQTVLSDEDTEEADLFSPDSASQVSIPPYR_1xCarbamidomethyl [C9]; 2xPhospho [S/T/Y]_1xCarbamidomethyl [C9]; 2xPhospho [S6(39.8); T11(13.5); S12(19.6); S14(19.6); T17(23); S20(47.9); T24(24.9); S31(7.5); S34(1.9); S36(1.3); S39(0.6); Y43(0.4)]	E9QLJ0	Cmya5	5	5	16.2327	15.2928	15.7628	0.0458559	1.91834	1.91834	12Mo-KO_1Way up vs WT	1.01541	3.62417	0.939855	E9QLJ0	ELGRDSPLCLTSPSEQTVLSDEDTEEADLFSPDSASQVSIPPYR	1xCarbamidomethyl [C9]; 2xPhospho [S/T/Y]	1xCarbamidomethyl [C9]; 2xPhospho [S6(39.8); T11(13.5); S12(19.6); S14(19.6); T17(23); S20(47.9); T24(24.9); S31(7.5); S34(1.9); S36(1.3); S39(0.6); Y43(0.4)]	NP_076310	0.157718	0.00469354	Cmya5	cardiomyopathy associated 5	76469	Cmya5	13|13 C3	protein-coding	+2σ	15.6222	15.267	15.2959	15.0588	15.2202	15.7656	16.3281	17.7042	15.7081	15.6573
2285	313	P62071_KFQEQECPPSPEPTRK_1xCarbamidomethyl [C7]; 1xPhospho [S10(100)]_1xCarbamidomethyl [C7]; 1xPhospho [S10(100); T14(0)]	P62071	Rras2	5	5	18.5153	17.8729	18.1941	0.0460465	1.56089	1.56089	12Mo-KO_1Way up vs WT	1.01001	2.41222	0.642366	P62071	KFQEQECPPSPEPTRK	1xCarbamidomethyl [C7]; 1xPhospho [S10(100)]	1xCarbamidomethyl [C7]; 1xPhospho [S10(100); T14(0)]	NP_080122	0.0708586	0.00104129	Rras2	related RAS viral (r-ras) oncogene 2	66922	Rras2	7|7 F1	protein-coding	+2σ	18.4555	17.035	17.8022	18.211	17.861	18.5863	18.5017	18.3029	18.9533	18.2324
2011	314	Q3TUQ5_QESDPEDDDVKKPALQSSVVATSK_1xDeamidated [Q16]; 1xPhospho [S3(100)]_1xDeamidated [Q16]; 1xPhospho [S3(100); S17(0); S18(0); T22(0); S23(0)]	Q3TUQ5	Pnn	5	5	17.3681	16.3731	16.8706	0.0461081	1.99312	1.99312	12Mo-KO_1Way up vs WT	1.0153	3.91268	0.995032	Q3TUQ5	QESDPEDDDVKKPALQSSVVATSK	1xDeamidated [Q16]; 1xPhospho [S3(100)]	1xDeamidated [Q16]; 1xPhospho [S3(100); S17(0); S18(0); T22(0); S23(0)]	NP_032917	0.0299128	0.00049971	Pnn	pinin	18949	Pnn	12 C1|12 26.0 cM	protein-coding	+2σ	16.9731	15.1822	16.1675	17.2544	16.2882	17.0925	18.2149	17.3681	17.0586	17.1064
1954	315	P97467_GSSGLNLGNFFASR_1xPhospho [S3(99.9)]_1xPhospho [S2(0.1); S3(99.9); S13(0)]	P97467	Pam	5	5	22.4309	22.8535	22.6422	0.0461682	0.746051	-1.34039	12Mo-KO_1Way down vs WT	-1.78528	-1.00637	-0.422654	P97467	GSSGLNLGNFFASR	1xPhospho [S3(99.9)]	1xPhospho [S2(0.1); S3(99.9); S13(0)]	NP_038654	0.0172271	0	Pam	peptidylglycine alpha-amidating monooxygenase	18484	Pam	1 D|1 47.76 cM	protein-coding	-1σ	23.2396	22.5898	22.5371	22.7371	23.164	22.6288	22.5047	22.1757	22.194	22.6512
2487	316	Q8BTI8_IHTTALTGQSPPLASGHQGEGDAPSVEPGATNIQQPSSPAPSTK_1xDeamidated [Q/N]; 1xPhospho [S/T]_1xDeamidated [N32; Q34; Q35]; 1xPhospho [T3(0); T4(0); T7(0); S10(0); S15(0); S25(0.2); T31(2.6); S37(22.3); S38(69.7); S42(2.6); T43(2.6)]	Q8BTI8	Srrm2	5	5	15.4945	16.4916	15.9931	0.0462812	0.500985	-1.99607	12Mo-KO_1Way down vs WT	-3.92682	-1.01463	-0.99716	Q8BTI8	IHTTALTGQSPPLASGHQGEGDAPSVEPGATNIQQPSSPAPSTK	1xDeamidated [Q/N]; 1xPhospho [S/T]	1xDeamidated [N32; Q34; Q35]; 1xPhospho [T3(0); T4(0); T7(0); S10(0); S15(0); S25(0.2); T31(2.6); S37(22.3); S38(69.7); S42(2.6); T43(2.6)]	NP_780438	0.0174748	0	Srrm2	serine/arginine repetitive matrix 2	75956	Srrm2	17|17 A3.3	protein-coding	-2σ	17.1472	17.0319	17.0177	15.612	15.6492	14.6652	16.0297	15.5443	15.3974	15.8356
3163	317	Q8C996_GHAPSTAAPAPSPAPMSSSVQSDEER_1xPhospho [S22(88.6)]_1xPhospho [S5(0); T6(0); S12(0); S17(0); S18(0.2); S19(11.2); S22(88.6)]	Q8C996	Tmem163	5	5	18.0979	17.4555	17.7767	0.0472623	1.56097	1.56097	12Mo-KO_1Way up vs WT	1.00688	2.41998	0.642444	Q8C996	GHAPSTAAPAPSPAPMSSSVQSDEER	1xPhospho [S22(88.6)]	1xPhospho [S5(0); T6(0); S12(0); S17(0); S18(0.2); S19(11.2); S22(88.6)]	NP_082411	0.00602074	0	Tmem163	transmembrane protein 163	72160	Tmem163	1|1 E3	protein-coding	+2σ	17.1746	16.9449	17.3022	17.6756	18.1801	17.8087	17.7814	17.8865	18.5599	18.4532
1221	318	Q9WTX2_EDSGTFSLGK_1xPhospho [S3(93.8)]_1xPhospho [S3(93.8); T5(6.2); S7(0)]	Q9WTX2	Prkra	5	5	19.1308	19.4622	19.2965	0.0473106	0.794744	-1.25827	12Mo-KO_1Way down vs WT	-1.57774	-1.00348	-0.331438	Q9WTX2	EDSGTFSLGK	1xPhospho [S3(93.8)]	1xPhospho [S3(93.8); T5(6.2); S7(0)]	NP_036001	0.0570625	0.00104129	Prkra	protein kinase, interferon inducible double stranded RNA dependent activator	23992	Prkra	2|2 C3	protein-coding	-1σ	19.5264	19.3192	19.1179	19.8358	19.5121	19.2778	19.1721	19.0322	19.2841	18.8879
3299	319	Q64727_GQGASPVAMQK_1xPhospho [S5(100)]_1xPhospho [S5(100)]	Q64727	Vcl	5	5	20.789	21.0437	20.9164	0.0474516	0.838119	-1.19315	12Mo-KO_1Way down vs WT	-1.42001	-1.00253	-0.254773	Q64727	GQGASPVAMQK	1xPhospho [S5(100)]	1xPhospho [S5(100)]	NP_033528	0.00568669	0	Vcl	vinculin	22330	Vcl	14 A3|14 11.53 cM	protein-coding	-0.5σ	21.1344	20.941	21.0607	21.2537	20.8289	20.8306	20.9869	20.9088	20.5462	20.6722
1107	320	Q3TEA8_LAEGEEEKPEPDGSSEESISTVEEQENETPPATSSEAEQPK_1xDeamidated [Q/N]; 1xPhospho [T29(99.7)]_1xDeamidated [Q25; N27; Q39]; 1xPhospho [S14(0); S15(0); S18(0); S20(0); T21(0); T29(99.7); T33(0); S34(0); S35(0)]	Q3TEA8	Hp1bp3	5	5	17.5032	18.6901	18.0967	0.0475248	0.439243	-2.27664	12Mo-KO_1Way down vs WT	-5.12414	-1.01151	-1.18691	Q3TEA8	LAEGEEEKPEPDGSSEESISTVEEQENETPPATSSEAEQPK	1xDeamidated [Q/N]; 1xPhospho [T29(99.7)]	1xDeamidated [Q25; N27; Q39]; 1xPhospho [S14(0); S15(0); S18(0); S20(0); T21(0); T29(99.7); T33(0); S34(0); S35(0)]	NP_001116368	0.000461387	0	Hp1bp3	heterochromatin protein 1, binding protein 3	15441	Hp1bp3	4|4 D3	protein-coding	-3σ	18.6452	18.5972	18.3395	19.2071	18.6616	17.9229	18.299	15.5818	17.8588	17.8536
11	321	P58871_MQAESQSPTNVDLEDKER_1xPhospho [T9(98.9)]_1xPhospho [S5(0); S7(1.1); T9(98.9)]	P58871	Tnks1bp1	5	5	17.6099	16.8018	17.2059	0.0476692	1.7509	1.7509	12Mo-KO_1Way up vs WT	1.00736	3.04327	0.808099	P58871	MQAESQSPTNVDLEDKER	1xPhospho [T9(98.9)]	1xPhospho [S5(0); S7(1.1); T9(98.9)]	NP_001074729	0.00268193	0	Tnks1bp1	tankyrase 1 binding protein 1	228140	Tnks1bp1	2|2 D	protein-coding	+2σ	16.0723	16.3636	17.5346	17.3938	16.6447	17.1191	17.7343	17.2225	17.8064	18.1673
395	322	Q6PHZ2_SGSPTVPIKPPCIPNGK_1xCarbamidomethyl [C12]; 1xDeamidated [N15]; 1xPhospho [S3(88.3)]_1xCarbamidomethyl [C12]; 1xDeamidated [N15]; 1xPhospho [S1(11.5); S3(88.3); T5(0.2)]	Q6PHZ2	Camk2d	5	5	15.7869	16.2445	16.0157	0.0477652	0.728201	-1.37325	12Mo-KO_1Way down vs WT	-1.87832	-1.00399	-0.457591	Q6PHZ2	SGSPTVPIKPPCIPNGK	1xCarbamidomethyl [C12]; 1xDeamidated [N15]; 1xPhospho [S3(88.3)]	1xCarbamidomethyl [C12]; 1xDeamidated [N15]; 1xPhospho [S1(11.5); S3(88.3); T5(0.2)]	NP_001020609	0.224964	0.00999726	Camk2d	calcium/calmodulin-dependent protein kinase II, delta	108058	Camk2d	3|3 G1- G2	protein-coding	-1σ	16.2858	15.7403	16.5481	16.1276	16.5207	15.3661	15.7656	15.7227	15.9399	16.1402
77	323	E9QK41_NGLHRPVSTDFAQYNSYGDISGGVR_1xDeamidated [N/Q]; 1xPhospho [S8(87.6)]_1xDeamidated [N1; Q13; N15]; 1xPhospho [S8(87.6); T9(12.4); Y14(0); S16(0); Y17(0); S21(0)]	E9QK41	Ablim1	5	5	17.8478	18.6538	18.2508	0.0480278	0.571974	-1.74833	12Mo-KO_1Way down vs WT	-3.03784	-1.0062	-0.805979	E9QK41	NGLHRPVSTDFAQYNSYGDISGGVR	1xDeamidated [N/Q]; 1xPhospho [S8(87.6)]	1xDeamidated [N1; Q13; N15]; 1xPhospho [S8(87.6); T9(12.4); Y14(0); S16(0); Y17(0); S21(0)]	NP_848803	0.00652785	0	Ablim1	actin-binding LIM protein 1	226251	Ablim1	19 D2|19 52.09 cM	protein-coding	-2σ	18.99	18.7218	18.448	18.6595	18.4496	17.9783	19.0238	17.0352	17.653	17.5487
774	324	Q62165_GVPIIFADELDDSKPPPSSSMPLILQEEK_1xPhospho [S]_1xPhospho [S13(0); S18(8.7); S19(45.6); S20(45.6)]	Q62165	Dag1	5	5	17.3048	16.7005	17.0026	0.049007	1.5202	1.5202	12Mo-KO_1Way up vs WT	1.00232	2.30566	0.604264	Q62165	GVPIIFADELDDSKPPPSSSMPLILQEEK	1xPhospho [S]	1xPhospho [S13(0); S18(8.7); S19(45.6); S20(45.6)]	NP_001263410	0.0264329	0.00049971	Dag1	dystroglycan 1	13138	Dag1	9 F1- F2|9 59.08 cM	protein-coding	+2σ	16.5961	16.9171	17.3007	16.8418	15.8469	17.5339	17.2558	17.4988	16.997	17.2384
1270	325	Q60575_MADTGSPGMQR_1xPhospho [S6(100)]_1xPhospho [T4(0); S6(100)]	Q60575	Kif1b	5	5	17.9848	18.3142	18.1495	0.0495651	0.795875	-1.25648	12Mo-KO_1Way down vs WT	-1.57787	-1.00055	-0.329386	Q60575	MADTGSPGMQR	1xPhospho [S6(100)]	1xPhospho [T4(0); S6(100)]	NP_001277924	0.00444051	0	Kif1b	kinesin family member 1B	16561	Kif1b	4 E2|4 79.05 cM	protein-coding	-1σ	18.4345	18.4455	18.5487	18.1116	18.0306	17.8901	18.3153	18.1033	17.8448	17.7703
1098	326	P51859_RAGDVLEDSPK_1xPhospho [S9(100)]_1xPhospho [S9(100)]	P51859	Hdgf	5	5	18.7785	17.6902	18.2343	0.0498049	2.12628	2.12628	12Mo-KO_1Way up vs WT	1.00082	4.51739	1.08833	P51859	RAGDVLEDSPK	1xPhospho [S9(100)]	1xPhospho [S9(100)]	NP_032257	0.00593543	0	Hdgf	heparin binding growth factor	15191	Hdgf	3 F1|3 38.78 cM	protein-coding	+2σ	16.9711	17.93	16.2939	18.7659	18.49	18.686	19.0059	18.5446	18.7805	18.8756
2034	327	Q61233_GSVSDEEMMELR_1xPhospho [S2(100)]_1xPhospho [S2(100); S4(0)]	Q61233	Lcp1	5	5	16.9037	17.6926	17.2981	0.0498821	0.578755	-1.72785	12Mo-KO_1Way down vs WT	-2.98438	-1.00036	-0.788975	Q61233	GSVSDEEMMELR	1xPhospho [S2(100)]	1xPhospho [S2(100); S4(0)]	NP_001234913	0.00217544	0	Lcp1	lymphocyte cytosolic protein 1	18826	Lcp1	14 D3|14 39.63 cM	protein-coding	-2σ	17.4667	17.5195	17.7541	18.584	17.1389	16.3305	16.4324	17.3407	17.5436	16.871
752	328	Q9JMC3_EGGSGSPSFSSPMDIFDMFFGGGGR_1xOxidation [M]; 1xPhospho [S4(93.7)]_1xOxidation [M13; M18]; 1xPhospho [S4(93.7); S6(4.2); S8(1); S10(1); S11(0.2)]	Q9JMC3	Dnaja4	5	5	13.2322	14.003	13.6176	0.0502181	0.58611	-1.70616	12Mo-KO_1Way down vs WT	-2.91288	1.00065	-0.770756	Q9JMC3	EGGSGSPSFSSPMDIFDMFFGGGGR	1xOxidation [M]; 1xPhospho [S4(93.7)]	1xOxidation [M13; M18]; 1xPhospho [S4(93.7); S6(4.2); S8(1); S10(1); S11(0.2)]	NP_067397	0.0609604	0.00104129	Dnaja4	DnaJ heat shock protein family (Hsp40) member A4	58233	Dnaja4	9|9 A5.3	protein-coding	-2σ	14.4052	14.2507	13.6453	13.9585	13.7552	13.2989	13.1777	12.2414	13.2989	14.1441
3080	329	A2ASS6_SVDDSEVGTGVTIGAQK_1xPhospho [S1(100)]_1xPhospho [S1(100); S5(0); T9(0); T12(0)]	A2ASS6	---	5	5	17.618	16.8716	17.2448	0.0505103	1.6776	1.6776	12Mo-KO_1Way up vs WT	-1.00146	2.81846	0.746399	A2ASS6	SVDDSEVGTGVTIGAQK	1xPhospho [S1(100)]	1xPhospho [S1(100); S5(0); T9(0); T12(0)]	---	0.055467	0.00104129	Ttn	titin	22138	Ttn	2 C3|2 45.13 cM	protein-coding	+2σ	16.47	16.5757	17.9707	16.1924	17.1489	17.7027	17.4158	17.8421	17.6281	17.5011
1150	330	G5E8J6_YQDHEEEDDGDSDEDSHTHR_1xPhospho [S12(100)]_1xPhospho [Y1(0); S12(100); S16(0); T18(0)]	G5E8J6	Hrc	5	5	18.5283	18.168	18.3482	0.0506924	1.28369	1.28369	12Mo-KO_1Way up vs WT	-1.00096	1.64944	0.360295	G5E8J6	YQDHEEEDDGDSDEDSHTHR	1xPhospho [S12(100)]	1xPhospho [Y1(0); S12(100); S16(0); T18(0)]	NP_034603	3.27742e-06	0	Hrc	histidine rich calcium binding protein	15464	Hrc	7 B3|7 29.26 cM	protein-coding	+1σ	17.9678	18.0581	18.0715	18.0972	18.6452	18.6803	18.8229	18.2667	18.4704	18.4011
952	331	Q6P5B5_TVMDGGLESDGPNMTENGLEDESRPQR_1xDeamidated [N/Q]; 1xPhospho [S/T]_1xDeamidated [N13; N17; Q26]; 1xPhospho [T1(0); S9(50); T15(50); S23(0)]	Q6P5B5	Fxr2	5	5	16.9913	17.7629	17.3771	0.0513805	0.585793	-1.70709	12Mo-KO_1Way down vs WT	-2.92605	1.00409	-0.771537	Q6P5B5	TVMDGGLESDGPNMTENGLEDESRPQR	1xDeamidated [N/Q]; 1xPhospho [S/T]	1xDeamidated [N13; N17; Q26]; 1xPhospho [T1(0); S9(50); T15(50); S23(0)]	NP_035944	0.0381256	0.00049971	Fxr2	fragile X mental retardation, autosomal homolog 2	23879	Fxr2	11 B3|11 42.86 cM	protein-coding	-2σ	18.1469	18.1186	18.5293	16.9891	17.0304	16.5749	17.2347	17.0549	16.916	17.1762
299	332	Q6P542_SKPAAADSEGEEEEEDTAKEK_1xPhospho [S8(100)]_1xPhospho [S1(0); S8(100); T17(0)]	Q6P542	Abcf1	5	5	18.6791	18.0743	18.3767	0.0514152	1.52078	1.52078	12Mo-KO_1Way up vs WT	-1.00328	2.32035	0.604809	Q6P542	SKPAAADSEGEEEEEDTAKEK	1xPhospho [S8(100)]	1xPhospho [S1(0); S8(100); T17(0)]	NP_038882	0.00129528	0	Abcf1	ATP-binding cassette, sub-family F (GCN20), member 1	224742	Abcf1	17 B1|17 18.8 cM	protein-coding	+2σ	17.972	17.4413	18.0409	18.2958	18.6213	18.1617	18.891	18.3414	19.0419	18.9594
2968	333	Q8CGB6_WDSYENFNQHHEDSVDGALAHTR_2xPhospho [S3(100); S14(99.9)]_2xPhospho [S3(100); Y4(0.1); S14(99.9); T22(0)]	Q8CGB6	Tns2	5	5	17.361	17.9464	17.6537	0.051737	0.66649	-1.5004	12Mo-KO_1Way down vs WT	-2.25996	1.00389	-0.585344	Q8CGB6	WDSYENFNQHHEDSVDGALAHTR	2xPhospho [S3(100); S14(99.9)]	2xPhospho [S3(100); Y4(0.1); S14(99.9); T22(0)]	NP_705761	0.004907	0	Tns2	tensin 2	209039	Tns2	15 F2|15 57.29 cM	protein-coding	-2σ	18.3147	18.1605	18.0612	17.9569	17.2385	17.8204	17.068	17.6103	16.8598	17.4468
1682	334	Q9JJW5_SPPNPENIAPGYSGPLK_1xPhospho [S1(100)]_1xPhospho [S1(100); Y12(0); S13(0)]	Q9JJW5	Myoz2	5	5	24.4987	24.7832	24.641	0.0519222	0.82104	-1.21797	12Mo-KO_1Way down vs WT	-1.48655	1.00209	-0.284476	Q9JJW5	SPPNPENIAPGYSGPLK	1xPhospho [S1(100)]	1xPhospho [S1(100); Y12(0); S13(0)]	NP_067478	9.06836e-05	0	Myoz2	myozenin 2	59006	Myoz2	3|3 G1	protein-coding	-1σ	24.9755	24.6641	24.9755	24.8796	24.4215	24.2936	24.5535	24.4243	24.6689	24.5535
163	335	Q61234_QPSSPGPQPR_1xPhospho [S4(100)]_1xPhospho [S3(0); S4(100)]	Q61234	---	5	5	20.6385	21.1272	20.8829	0.0521618	0.712637	-1.40324	12Mo-KO_1Way down vs WT	-1.97703	1.00404	-0.48876	Q61234	QPSSPGPQPR	1xPhospho [S4(100)]	1xPhospho [S3(0); S4(100)]	---	0.0151508	0	Snta1	syntrophin, acidic 1	20648	Snta1	2 H1|2 76.52 cM	protein-coding	-1σ	21.0924	21.3179	20.7762	21.4341	21.0156	20.8762	20.736	21.1294	20.2713	20.1795
2708	336	E9QQ25_SPEPSAVTSRDSPQPPEPQPVPEK_1xPhospho [T/S]_1xPhospho [S1(0); S5(5.7); T8(47.2); S9(47.2); S12(0)]	E9QQ25	Speg	5	5	20.5687	20.1864	20.3775	0.0522585	1.30337	1.30337	12Mo-KO_1Way up vs WT	-1.0033	1.70438	0.38225	E9QQ25	SPEPSAVTSRDSPQPPEPQPVPEK	1xPhospho [T/S]	1xPhospho [S1(0); S5(5.7); T8(47.2); S9(47.2); S12(0)]	NP_031489	0.00151544	0	Speg	SPEG complex locus	11790	Speg	1 C4|1 38.88 cM	protein-coding	+1σ	20.3674	19.7243	20.1574	20.244	20.4391	20.541	20.6969	20.2875	20.3979	20.9202
3356	337	Q8BJ05_DLVQPDKPASPK_1xPhospho [S10(100)]_1xPhospho [S10(100)]	Q8BJ05	Zc3h14	5	5	17.1689	16.7376	16.9533	0.0527926	1.34842	1.34842	12Mo-KO_1Way up vs WT	-1.00459	1.8266	0.431273	Q8BJ05	DLVQPDKPASPK	1xPhospho [S10(100)]	1xPhospho [S10(100)]	NP_001008506	0.12053	0.00324389	Zc3h14	zinc finger CCCH type containing 14	75553	Zc3h14	12|12 E	protein-coding	+1σ	16.4141	16.4352	17.1313	16.9844	16.7233	17.1653	17.0834	17.1662	17.6004	16.8293
2813	338	B2RQK7_AGGAESGPEEDALSLGAEACNFMQPLGGR_1xCarbamidomethyl [C20]; 1xDeamidated [N/Q]; 1xPhospho [S6(100)]_1xCarbamidomethyl [C20]; 1xDeamidated [N21; Q24]; 1xPhospho [S6(100); S14(0)]	B2RQK7	Synpo2l	5	5	16.8178	18.0556	17.4367	0.0530075	0.424008	-2.35845	12Mo-KO_1Way down vs WT	-5.64156	1.01425	-1.23784	B2RQK7	AGGAESGPEEDALSLGAEACNFMQPLGGR	1xCarbamidomethyl [C20]; 1xDeamidated [N/Q]; 1xPhospho [S6(100)]	1xCarbamidomethyl [C20]; 1xDeamidated [N21; Q24]; 1xPhospho [S6(100); S14(0)]	NP_001297360	1.58289e-06	0	Synpo2l	synaptopodin 2-like	68760	Synpo2l	14|14 A3	protein-coding	-3σ	18.6784	17.5638	18.0079	17.2048	18.8231	18.5079	16.7599	16.5383	16.4212	15.8615
1250	339	Q9ET78_SDSAPPSPVSATVPEEEPPAPR_1xPhospho [S1(89)]_1xPhospho [S1(89); S3(11); S7(0); S10(0); T12(0)]	Q9ET78	Jph2	5	5	17.7413	18.8993	18.3203	0.0531272	0.448107	-2.23161	12Mo-KO_1Way down vs WT	-5.04909	1.01386	-1.15809	Q9ET78	SDSAPPSPVSATVPEEEPPAPR	1xPhospho [S1(89)]	1xPhospho [S1(89); S3(11); S7(0); S10(0); T12(0)]	NP_001192005	0.0022706	0	Jph2	junctophilin 2	59091	Jph2	2|2 H3	protein-coding	-3σ	19.5379	18.6286	19.239	17.6741	19.4171	17.2924	16.7076	17.7574	18.9782	17.9706
1960	340	O88492_ATNHGVGQAILTSTESLCCETSSFSDK_2xCarbamidomethyl [C18; C19]; 1xPhospho [T12(77.4)]_2xCarbamidomethyl [C18; C19]; 1xPhospho [T2(0); T12(77.4); S13(10.6); T14(10.6); S16(1.5); T21(0); S22(0); S23(0); S25(0)]	O88492	Plin4	5	5	18.4703	19.2522	18.8612	0.0531428	0.581596	-1.71941	12Mo-KO_1Way down vs WT	-2.98409	1.00938	-0.78191	O88492	ATNHGVGQAILTSTESLCCETSSFSDK	2xCarbamidomethyl [C18; C19]; 1xPhospho [T12(77.4)]	2xCarbamidomethyl [C18; C19]; 1xPhospho [T2(0); T12(77.4); S13(10.6); T14(10.6); S16(1.5); T21(0); S22(0); S23(0); S25(0)]	NP_065593	0.000622611	0	Plin4	perilipin 4	57435	Plin4	17|17 D	protein-coding	-2σ	19.6415	19.5509	19.3973	19.6438	18.0277	18.8583	18.4389	18.7756	18.1161	18.1627
889	341	A0A0N4SVL0_TSSPTSLPPLAR_1xPhospho [S/T]_1xPhospho [T1(0.1); S2(49.9); S3(49.9); T5(0.1); S6(0)]	A0A0N4SVL0	---	5	5	16.9833	16.4135	16.6984	0.0532647	1.48431	1.48431	12Mo-KO_1Way up vs WT	-1.00709	2.21881	0.569797	A0A0N4SVL0	TSSPTSLPPLAR	1xPhospho [S/T]	1xPhospho [T1(0.1); S2(49.9); S3(49.9); T5(0.1); S6(0)]	---	0.0763682	0.00161377	Eif4g3	eukaryotic translation initiation factor 4 gamma, 3	230861	Eif4g3	4|4 D3	protein-coding	+2σ	16.1352	16.2246	16.5055	17.0864	16.1158	17.0534	16.7035	16.6276	17.6071	16.925
2808	342	B2RQK7_AGGAESGPEEDALSLGAEACNFMQPLGGR_1xCarbamidomethyl [C20]; 1xPhospho [S6(100)]_1xCarbamidomethyl [C20]; 1xPhospho [S6(100); S14(0)]	B2RQK7	Synpo2l	5	5	22.4245	22.6913	22.5579	0.0533865	0.831128	-1.20318	12Mo-KO_1Way down vs WT	-1.45263	1.00344	-0.266858	B2RQK7	AGGAESGPEEDALSLGAEACNFMQPLGGR	1xCarbamidomethyl [C20]; 1xPhospho [S6(100)]	1xCarbamidomethyl [C20]; 1xPhospho [S6(100); S14(0)]	NP_001297360	1.58289e-06	0	Synpo2l	synaptopodin 2-like	68760	Synpo2l	14|14 A3	protein-coding	-0.5σ	22.8113	22.625	22.5544	23.0007	22.4651	22.3014	22.316	22.4868	22.6645	22.3536
2642	343	D3Z080_SPSPPPR_1xPhospho [S3(100)]_1xPhospho [S1(0); S3(100)]	D3Z080	Sorbs2	5	5	20.1178	20.7116	20.4147	0.0534356	0.662577	-1.50926	12Mo-KO_1Way down vs WT	-2.29556	1.00777	-0.593839	D3Z080	SPSPPPR	1xPhospho [S3(100)]	1xPhospho [S1(0); S3(100)]	NP_001297636	0.173748	0.0063868	Sorbs2	sorbin and SH3 domain containing 2	234214	Sorbs2	8|8 B1.1	protein-coding	-2σ	20.8323	20.9642	20.3461	20.8035	20.6121	20.56	20.0084	20.7485	19.8319	19.44
1801	344	Q02780_LKSVEDEMDSPGEEPFYTGQGR_1xPhospho [S3(99.9)]_1xPhospho [S3(99.9); S10(0.1); Y17(0); T18(0)]	Q02780	Nfia	5	5	18.6177	17.988	18.3028	0.0536982	1.54732	1.54732	12Mo-KO_1Way up vs WT	-1.00887	2.41542	0.629767	Q02780	LKSVEDEMDSPGEEPFYTGQGR	1xPhospho [S3(99.9)]	1xPhospho [S3(99.9); S10(0.1); Y17(0); T18(0)]	NP_001116424	0.0143784	0	Nfia	nuclear factor I/A	18027	Nfia	4 C5- C6|4 45.52 cM	protein-coding	+2σ	18.0543	17.6288	18.2581	17.4598	18.5388	19.2992	18.369	18.7696	18.1776	18.4732
364	345	Q9D6W8_RGSPGGVEMNVELPQQEGDDDDDEDEEAAAGR_1xDeamidated [Q/N]; 1xPhospho [S3(100)]_1xDeamidated [N10; Q15; Q16]; 1xPhospho [S3(100)]	Q9D6W8	Borcs6	5	5	16.4652	17.2162	16.8407	0.0538398	0.594221	-1.68288	12Mo-KO_1Way down vs WT	-2.86318	1.01098	-0.750929	Q9D6W8	RGSPGGVEMNVELPQQEGDDDDDEDEEAAAGR	1xDeamidated [Q/N]; 1xPhospho [S3(100)]	1xDeamidated [N10; Q15; Q16]; 1xPhospho [S3(100)]	NP_082281	0.00115005	0	Borcs6	BLOC-1 related complex subunit 6	71923	Borcs6	11|11 B3	protein-coding	-2σ	17.0072	17.5155	18.2469	16.9697	16.3415	16.1537	16.6	16.5771	16.3251	16.6702
2678	346	Q8JZX4_RPDPDSDEDEDYER_1xPhospho [S6(100)]_1xPhospho [S6(100); Y12(0)]	Q8JZX4	Rbm17	5	5	18.1332	17.1917	17.6624	0.0540441	1.92056	1.92056	12Mo-KO_1Way up vs WT	-1.01452	3.74208	0.941523	Q8JZX4	RPDPDSDEDEDYER	1xPhospho [S6(100)]	1xPhospho [S6(100); Y12(0)]	NP_690037	0.00142457	0	Rbm17	RNA binding motif protein 17	76938	Rbm17	2|2 A1	protein-coding	+2σ	15.9243	17.9662	17.6277	16.5387	17.9014	18.0208	18.2827	17.8536	18.3385	18.1704
2981	347	A0A1Y7VL44_LPVSSSTSNLHVDR_1xPhospho [S6(83.2)]_1xPhospho [S4(0.1); S5(8.3); S6(83.2); T7(8.3); S8(0.1)]	A0A1Y7VL44	---	5	5	18.3248	17.8699	18.0973	0.0541365	1.37068	1.37068	12Mo-KO_1Way up vs WT	-1.00715	1.89219	0.454894	A0A1Y7VL44	LPVSSSTSNLHVDR	1xPhospho [S6(83.2)]	1xPhospho [S4(0.1); S5(8.3); S6(83.2); T7(8.3); S8(0.1)]	---	0.00557951	0	Ttc7b	tetratricopeptide repeat domain 7B	104718	Ttc7b	12|12 E	protein-coding	+1σ	17.925	17.8829	17.92	18.0409	17.5807	17.6724	18.4518	18.3008	18.3736	18.8253
2361	348	Q8C2Q3_GQPGSAYDGTGQPSAAYLSMSQGAVANANSTPPPYER_1xDeamidated [N/Q]; 1xPhospho [S30(80.8)]_1xDeamidated [Q2; Q12; Q22; N27; N29]; 1xPhospho [S5(0); Y7(0); T10(0); S14(0); Y17(0); S19(0); S21(0); S30(80.8); T31(19.1); Y35(0.1)]	Q8C2Q3	Rbm14	5	5	17.2252	17.5992	17.4122	0.0542641	0.771689	-1.29586	12Mo-KO_1Way down vs WT	-1.68941	1.00605	-0.373909	Q8C2Q3	GQPGSAYDGTGQPSAAYLSMSQGAVANANSTPPPYER	1xDeamidated [N/Q]; 1xPhospho [S30(80.8)]	1xDeamidated [Q2; Q12; Q22; N27; N29]; 1xPhospho [S5(0); Y7(0); T10(0); S14(0); Y17(0); S19(0); S21(0); S30(80.8); T31(19.1); Y35(0.1)]	NP_063922	0.0502178	0.000921163	Rbm14	RNA binding motif protein 14	56275	Rbm14	19|19 A	protein-coding	-1σ	17.8625	17.8373	17.5378	17.3169	17.4413	17.4111	17.2035	17.1179	16.8308	17.563
1158	349	G5E8J6_QGYEEEEDDDDDDGDDDSTEHVHQAHR_1xDeamidated [Q]; 1xPhospho [S18(98.1)]_1xDeamidated [Q1; Q24]; 1xPhospho [Y3(0); S18(98.1); T19(1.9)]	G5E8J6	Hrc	5	5	18.8937	17.2205	18.0571	0.054323	3.18916	3.18916	12Mo-KO_1Way up vs WT	-1.02773	10.4527	1.67318	G5E8J6	QGYEEEEDDDDDDGDDDSTEHVHQAHR	1xDeamidated [Q]; 1xPhospho [S18(98.1)]	1xDeamidated [Q1; Q24]; 1xPhospho [Y3(0); S18(98.1); T19(1.9)]	NP_034603	4.5713e-05	0	Hrc	histidine rich calcium binding protein	15464	Hrc	7 B3|7 29.26 cM	protein-coding	+3σ	15.4094	18.3101	19.2071	15.7133	17.4628	18.8253	19.2344	18.5476	18.7823	19.079
149	350	Q9WTQ5_SPSWISASMTEPLEHAEGVATPPVGEVTEK_1xPhospho [S1(98.6)]_1xPhospho [S1(98.6); S3(1.4); S6(0); S8(0); T10(0); T21(0); T28(0)]	Q9WTQ5	Akap12	5	5	16.1983	17.2282	16.7132	0.0544037	0.489771	-2.04177	12Mo-KO_1Way down vs WT	-4.2409	1.01729	-1.02982	Q9WTQ5	SPSWISASMTEPLEHAEGVATPPVGEVTEK	1xPhospho [S1(98.6)]	1xPhospho [S1(98.6); S3(1.4); S6(0); S8(0); T10(0); T21(0); T28(0)]	NP_112462	0.0519113	0.00104129	Akap12	A kinase (PRKA) anchor protein (gravin) 12	83397	Akap12	10|10 A1	protein-coding	-2σ	17.7319	16.9984	17.5605	16.9831	16.867	16.4066	15.4119	17.4611	16.5924	15.1197
387	351	F6RWZ9_ENIPTPALESTESSNTTIEDEDVK_1xPhospho [T5(100)]_1xPhospho [T5(100); S10(0); T11(0); S13(0); S14(0); T16(0); T17(0)]	F6RWZ9	---	5	5	16.4666	16.1362	16.3014	0.0545551	1.25741	1.25741	12Mo-KO_1Way up vs WT	-1.0057	1.5901	0.330455	F6RWZ9	ENIPTPALESTESSNTTIEDEDVK	1xPhospho [T5(100)]	1xPhospho [T5(100); S10(0); T11(0); S13(0); S14(0); T16(0); T17(0)]	---	0.0176418	0	Camk2d	calcium/calmodulin-dependent protein kinase II, delta	108058	Camk2d	3|3 G1- G2	protein-coding	+1σ	16.5311	16.2268	15.822	16.0321	16.069	16.3449	16.2174	16.4581	16.6113	16.7015
1984	352	E9Q8A3_SVENLPECGITHEQR_1xCarbamidomethyl [C8]; 1xPhospho [S1(100)]_1xCarbamidomethyl [C8]; 1xPhospho [S1(100); T11(0)]	E9Q8A3	---	5	5	17.547	18.1002	17.8236	0.0545798	0.681492	-1.46737	12Mo-KO_1Way down vs WT	-2.17388	1.00962	-0.553232	E9Q8A3	SVENLPECGITHEQR	1xCarbamidomethyl [C8]; 1xPhospho [S1(100)]	1xCarbamidomethyl [C8]; 1xPhospho [S1(100); T11(0)]	---	0.044813	0.000921163	Pi4kb	phosphatidylinositol 4-kinase beta	107650	Pi4kb	3|3 F2.1	protein-coding	-1σ	18.3504	18.3894	17.8786	18.266	17.6168	16.7981	17.631	17.6703	17.9249	17.7106
2609	353	D3Z5J3; E9Q6A3_STQDLSDVSTDEVGIPLR_1xPhospho [S/T]_1xPhospho [S1(50); T2(50); S6(0); S9(0); T10(0)]	D3Z5J3; E9Q6A3	---	5	5	18.1378	18.7861	18.462	0.0547785	0.638014	-1.56736	12Mo-KO_1Way down vs WT	-2.48553	1.01176	-0.648341	D3Z5J3; E9Q6A3	STQDLSDVSTDEVGIPLR	1xPhospho [S/T]	1xPhospho [S1(50); T2(50); S6(0); S9(0); T10(0)]	---	9.69284e-05	0	Sorbs1	sorbin and SH3 domain containing 1	20411	Sorbs1	19 C3|19 34.25 cM	protein-coding	-2σ	19.2554	18.7825	18.4994	19.2853	18.1082	17.8729	18.0023	18.0761	17.8923	18.8453
3107	354	P70399_SDSPEIPFQAATGSSDGLDSSSSGNSFVGLR_1xDeamidated [N/Q]; 1xPhospho [S1(86.3)]_1xDeamidated [Q9; N25]; 1xPhospho [S1(86.3); S3(13.8); T12(0); S14(0); S15(0); S20(0); S21(0); S22(0); S23(0); S26(0)]	P70399	Trp53bp1	5	5	17.6808	17.0749	17.3778	0.0547806	1.52196	1.52196	12Mo-KO_1Way up vs WT	-1.01099	2.34183	0.605932	P70399	SDSPEIPFQAATGSSDGLDSSSSGNSFVGLR	1xDeamidated [N/Q]; 1xPhospho [S1(86.3)]	1xDeamidated [Q9; N25]; 1xPhospho [S1(86.3); S3(13.8); T12(0); S14(0); S15(0); S20(0); S21(0); S22(0); S23(0); S26(0)]	NP_001277759	0.00847998	0	Trp53bp1	transformation related protein 53 binding protein 1	27223	Trp53bp1	2|2 E5	protein-coding	+2σ	17.7752	16.2098	17.0203	17.4521	16.9171	17.587	17.7173	17.7755	17.7737	17.5507
2110	355	Q9R0Q7_FSEMMDHMGGDEDVDLPEVDGADDDSQDSDDEKMPDLE_1xPhospho [S29(79.8)]_1xPhospho [S2(0); S26(20.3); S29(79.8)]	Q9R0Q7	Ptges3	5	5	19.9501	18.9178	19.4339	0.0553894	2.04527	2.04527	12Mo-KO_1Way up vs WT	-1.02117	4.27166	1.03229	Q9R0Q7	FSEMMDHMGGDEDVDLPEVDGADDDSQDSDDEKMPDLE	1xPhospho [S29(79.8)]	1xPhospho [S2(0); S26(20.3); S29(79.8)]	NP_062740	0.063901	0.00104129	Ptges3	prostaglandin E synthase 3	56351	Ptges3	10|10 D3	protein-coding	+2σ	19.3167	19.5602	19.0602	17.6403	19.0118	18.6975	20.2738	20.0885	20.4073	20.2835
1154	356	G5E8J6_KEEDEDESDEDDHHVSR_1xPhospho [S8(100)]_1xPhospho [S8(100); S16(0)]	G5E8J6	Hrc	5	5	20.7775	19.0435	19.9105	0.0555669	3.32655	3.32655	12Mo-KO_1Way up vs WT	-1.03699	11.4752	1.73403	G5E8J6	KEEDEDESDEDDHHVSR	1xPhospho [S8(100)]	1xPhospho [S8(100); S16(0)]	NP_034603	7.53284e-05	0	Hrc	histidine rich calcium binding protein	15464	Hrc	7 B3|7 29.26 cM	protein-coding	+6σ	16.7403	19.9059	17.6641	20.3802	20.5271	20.8516	20.8516	20.8064	20.555	20.8231
1918	357	F7AA26_ANGHSTDQPQDLLGNSLQAPASPSSSTSSHCSSR_1xCarbamidomethyl [C31]; 2xDeamidated [N/Q]; 1xPhospho [S/T]_1xCarbamidomethyl [C31]; 2xDeamidated [N2; Q8; Q10; N15; Q18]; 1xPhospho [S5(0); T6(0); S16(0); S22(0.3); S24(25.8); S25(25.8); S26(5.5); T27(5.5); S28(5ｪ'ﾖ$b*	F7AA26	---	5	5	16.8471	18.7962	17.8217	0.0555732	0.258972	-3.86142	12Mo-KO_1Way down vs WT	-15.5326	1.04172	-1.94913	F7AA26	ANGHSTDQPQDLLGNSLQAPASPSSSTSSHCSSR	1xCarbamidomethyl [C31]; 2xDeamidated [N/Q]; 1xPhospho [S/T]	1xCarbamidomethyl [C31]; 2xDeamidated [N2; Q8; Q10; N15; Q18]; 1xPhospho [S5(0); T6(0); S16(0); S22(0.3); S24(25.8); S25(25.8); S26(5.5); T27(5.5); S28(5ｪ'ﾖ$b*	---	0.00145193	0	Pakap	paralemmin A kinase anchor protein	677884	Pakap	4 B3|4	protein-coding	-6σ	19.1912	18.9878	17.972	18.5972	19.2329	18.7218	14.2492	17.0764	15.7477	18.4405
1085	358	P07901_DKEVSDDEAEEKEEK_1xPhospho [S5(100)]_1xPhospho [S5(100)]	P07901	Hsp90aa1	5	5	19.4209	18.6107	19.0158	0.0558841	1.75345	1.75345	12Mo-KO_1Way up vs WT	-1.01808	3.13016	0.810196	P07901	DKEVSDDEAEEKEEK	1xPhospho [S5(100)]	1xPhospho [S5(100)]	NP_034610	0.0169831	0	Hsp90aa1	heat shock protein 90, alpha (cytosolic), class A member 1	15519	Hsp90aa1	12 F1|12 60.75 cM	protein-coding	+2σ	17.543	18.96	18.1983	18.9019	19.4504	19.4284	19.8288	18.9552	19.3405	19.5518
3034	359	A2ASS6_SRSPTPPSIAAK_1xPhospho [S3(99.9)]_1xPhospho [S1(0); S3(99.9); T5(0); S8(0)]	A2ASS6	---	5	5	22.152	21.3568	21.7544	0.0567546	1.73532	1.73532	12Mo-KO_1Way up vs WT	-1.02032	3.07251	0.795198	A2ASS6	SRSPTPPSIAAK	1xPhospho [S3(99.9)]	1xPhospho [S1(0); S3(99.9); T5(0); S8(0)]	---	0.00150109	0	Ttn	titin	22138	Ttn	2 C3|2 45.13 cM	protein-coding	+2σ	21.2537	20.9825	20.631	22.0579	21.8588	22.2853	22.4528	21.4612	21.7725	22.7881
106	360	E9Q9C3_SSPNVANQPPSPGGK_1xPhospho [S11(100)]_1xPhospho [S1(0); S2(0); S11(100)]	E9Q9C3	---	5	5	19.5543	19.8142	19.6842	0.0567665	0.83519	-1.19733	12Mo-KO_1Way down vs WT	-1.44308	1.00661	-0.259824	E9Q9C3	SSPNVANQPPSPGGK	1xPhospho [S11(100)]	1xPhospho [S1(0); S2(0); S11(100)]	---	0.000902313	0	Afdn	afadin, adherens junction formation factor	17356	Afdn	17|17 A1- A2	protein-coding	-0.5σ	19.6947	19.8623	20.0088	19.6079	19.8971	19.4099	19.6342	19.8067	19.6342	19.2867
1829	361	Q80XU3_KVVDYSQFQESDDADEDYGR_1xPhospho [S11(100)]_1xPhospho [Y5(0); S6(0); S11(100); Y18(0)]	Q80XU3	Nucks1	5	5	17.6082	17.1437	17.3759	0.0568511	1.37982	1.37982	12Mo-KO_1Way up vs WT	-1.01198	1.92673	0.464482	Q80XU3	KVVDYSQFQESDDADEDYGR	1xPhospho [S11(100)]	1xPhospho [Y5(0); S6(0); S11(100); Y18(0)]	NP_001139276	0.0290711	0.00049971	Nucks1	nuclear casein kinase and cyclin-dependent kinase substrate 1	98415	Nucks1	1|1 E4	protein-coding	+1σ	16.8622	17.3267	17.3198	17.0423	17.1676	17.631	17.2757	17.0943	18.0632	17.9767
1254	362	Q9ET78_DGLLSPGSWNGEPGGEGSRPATPSDGAGR_1xDeamidated [N10]; 1xPhospho [S8(99.9)]_1xDeamidated [N10]; 1xPhospho [S5(0.1); S8(99.9); S18(0); T22(0); S24(0)]	Q9ET78	Jph2	5	5	19.0657	19.7059	19.3858	0.0576603	0.641635	-1.55852	12Mo-KO_1Way down vs WT	-2.47384	1.01847	-0.640174	Q9ET78	DGLLSPGSWNGEPGGEGSRPATPSDGAGR	1xDeamidated [N10]; 1xPhospho [S8(99.9)]	1xDeamidated [N10]; 1xPhospho [S5(0.1); S8(99.9); S18(0); T22(0); S24(0)]	NP_001192005	0.024034	0.000280731	Jph2	junctophilin 2	59091	Jph2	2|2 H3	protein-coding	-2σ	19.7088	20.244	19.9858	19.7299	18.8609	19.2037	18.4187	19.4373	19.1755	19.0934
1190	363	Q99JP6_SQSADTPGPTER_1xPhospho [S3(99.6)]_1xPhospho [S1(0.4); S3(99.6); T6(0); T10(0)]	Q99JP6	Homer3	5	5	15.829	16.6245	16.2267	0.0578914	0.576167	-1.73561	12Mo-KO_1Way down vs WT	-3.08367	1.02368	-0.795441	Q99JP6	SQSADTPGPTER	1xPhospho [S3(99.6)]	1xPhospho [S1(0.4); S3(99.6); T6(0); T10(0)]	NP_001139625	0.136761	0.00396376	Homer3	homer scaffolding protein 3	26558	Homer3	8|8 B3.3	protein-coding	-2σ	17.3486	16.8744	15.7946	15.9629	17.1418	15.1807	16.0269	16.1701	15.9923	15.7751
708	364	F8WJE0_TPPSTPPATANLSADDDFQNTDLR_1xPhospho [T1(99.7)]_1xPhospho [T1(99.7); S4(0.3); T5(0); T9(0); S13(0); T21(0)]	F8WJE0	Samhd1	5	5	17.866	18.3982	18.1321	0.0579827	0.691522	-1.44608	12Mo-KO_1Way down vs WT	-2.12454	1.01596	-0.532152	F8WJE0	TPPSTPPATANLSADDDFQNTDLR	1xPhospho [T1(99.7)]	1xPhospho [T1(99.7); S4(0.3); T5(0); T9(0); S13(0); T21(0)]	NP_061339	0.002826	0	Samhd1	SAM domain and HD domain, 1	56045	Samhd1	2|2 H1	protein-coding	-1σ	19.2026	18.1082	18.3894	18.3546	17.936	17.5033	17.8252	17.9095	17.9691	18.1229
1238	365	A0A0R4J0V4_SGSREQAGTPASDGSR_1xPhospho [S1(98)]_1xPhospho [S1(98); S3(2); T9(0); S12(0); S15(0)]	A0A0R4J0V4	Jmy	5	5	16.4442	16.9992	16.7217	0.0579859	0.680666	-1.46915	12Mo-KO_1Way down vs WT	-2.19435	1.01666	-0.554981	A0A0R4J0V4	SGSREQAGTPASDGSR	1xPhospho [S1(98)]	1xPhospho [S1(98); S3(2); T9(0); S12(0); S15(0)]	NP_067285	0.0456723	0.000921163	Jmy	junction-mediating and regulatory protein	57748	Jmy	13|13 C3	protein-coding	-2σ	16.5627	17.4248	16.8148	17.1298	17.064	16.8556	16.3111	16.9912	15.975	16.0882
2227	366	A0A0A6YY83_SSSPLPTVQLHPQSPTAGK_2xPhospho [S14(78.7); S/T]_2xPhospho [S1(15.2); S2(15.2); S3(69.5); T7(4); S14(78.7); T16(17.3)]	A0A0A6YY83	Pcdh7	5	5	16.4667	16.9989	16.7328	0.0582913	0.691509	-1.44611	12Mo-KO_1Way down vs WT	-2.12588	1.01656	-0.53218	A0A0A6YY83	SSSPLPTVQLHPQSPTAGK	2xPhospho [S14(78.7); S/T]	2xPhospho [S1(15.2); S2(15.2); S3(69.5); T7(4); S14(78.7); T16(17.3)]	NP_001116230	0.0815216	0.00180463	Pcdh7	protocadherin 7	54216	Pcdh7	5|5 C1	protein-coding	-1σ	17.4998	17.3007	16.6873	16.4214	17.0853	16.6032	16.1231	16.2452	16.9096	16.4523
3160	367	Q8BU14_EELEQQTDGDCDEEDDDKDGEVPK_1xCarbamidomethyl [C11]; 1xDeamidated [Q]; 1xPhospho [T7(100)]_1xCarbamidomethyl [C11]; 1xDeamidated [Q5; Q6]; 1xPhospho [T7(100)]	Q8BU14	Sec62	5	5	16.5688	18.6805	17.6246	0.0584262	0.231376	-4.32196	12Mo-KO_1Way down vs WT	-19.9581	1.06846	-2.11169	Q8BU14	EELEQQTDGDCDEEDDDKDGEVPK	1xCarbamidomethyl [C11]; 1xDeamidated [Q]; 1xPhospho [T7(100)]	1xCarbamidomethyl [C11]; 1xDeamidated [Q5; Q6]; 1xPhospho [T7(100)]	NP_081292	0.000978312	0	Sec62	SEC62 homolog (S. cerevisiae)	69276	Sec62	3|3 A3	protein-coding	-6σ	18.8916	16.8387	20.1165	19.0245	18.531	15.8267	15.4047	19.7185	15.7423	16.1516
1261	368	Q9ET78_SPARPASEHMAIEALQPPPAPSQEPEVAMYR_2xDeamidated [Q16; Q23]; 1xPhospho [S1(99.8)]_2xDeamidated [Q16; Q23]; 1xPhospho [S1(99.8); S7(0.2); S22(0); Y30(0)]	Q9ET78	Jph2	5	5	18.5154	17.8178	18.1666	0.0587896	1.62173	1.62173	12Mo-KO_1Way up vs WT	-1.02305	2.6906	0.697529	Q9ET78	SPARPASEHMAIEALQPPPAPSQEPEVAMYR	2xDeamidated [Q16; Q23]; 1xPhospho [S1(99.8)]	2xDeamidated [Q16; Q23]; 1xPhospho [S1(99.8); S7(0.2); S22(0); Y30(0)]	NP_001192005	3.4691e-05	0	Jph2	junctophilin 2	59091	Jph2	2|2 H3	protein-coding	+2σ	18.9462	17.3091	17.4903	17.7571	17.5864	18.5354	18.2445	18.6803	18.238	18.8786
327	369	O70318_EVENEQTPVSEPEEEKGSQPGPPVER_1xDeamidated [Q]; 1xPhospho [S10(100)]_1xDeamidated [Q6; Q19]; 1xPhospho [T7(0); S10(100); S18(0)]	O70318	Epb41l2	5	5	17.3115	16.4334	16.8725	0.0589169	1.83788	1.83788	12Mo-KO_1Way up vs WT	-1.02951	3.47749	0.878044	O70318	EVENEQTPVSEPEEEKGSQPGPPVER	1xDeamidated [Q]; 1xPhospho [S10(100)]	1xDeamidated [Q6; Q19]; 1xPhospho [T7(0); S10(100); S18(0)]	NP_001186194	0.0732206	0.00144181	Epb41l2	erythrocyte membrane protein band 4.1 like 2	13822	Epb41l2	10 A4|10 12.26 cM	protein-coding	+2σ	16.2783	16.4161	17.7454	16.0583	15.6692	17.2528	17.4408	17.6295	16.6092	17.6253
2358	370	Q0VBL3_SRSPLDKDAYAPSSSVVGTSVGSHR_2xPhospho [S1(100); S3(100)]_2xPhospho [S1(100); S3(100); Y10(0); S13(0); S14(0); S15(0); T19(0); S20(0); S23(0)]	Q0VBL3	Rbm15	5	5	17.4848	16.1084	16.7966	0.0590549	2.59616	2.59616	12Mo-KO_1Way up vs WT	-1.04736	7.05927	1.37638	Q0VBL3	SRSPLDKDAYAPSSSVVGTSVGSHR	2xPhospho [S1(100); S3(100)]	2xPhospho [S1(100); S3(100); Y10(0); S13(0); S14(0); S15(0); T19(0); S20(0); S23(0)]	NP_001039272	0.029489	0.00049971	Rbm15	RNA binding motif protein 15	229700	Rbm15	3|3 F2.3	protein-coding	+3σ	15.6347	17.7274	17.3297	15.4632	14.3872	17.4988	17.7278	17.3658	17.2854	17.5463
3315	371	P15920_KDSEEEVSLLGNQDIEEGNSR_1xPhospho [S3(98.3)]_1xPhospho [S3(98.3); S8(1.7); S20(0)]	P15920	Atp6v0a2	5	5	17.5268	16.4317	16.9793	0.0591406	2.13622	2.13622	12Mo-KO_1Way up vs WT	-1.03785	4.73616	1.09506	P15920	KDSEEEVSLLGNQDIEEGNSR	1xPhospho [S3(98.3)]	1xPhospho [S3(98.3); S8(1.7); S20(0)]	NP_035726	0.0188567	0	Atp6v0a2	ATPase, H+ transporting, lysosomal V0 subunit A2	21871	Atp6v0a2	5|5 F	protein-coding	+2σ	15.376	18.1372	16.2882	16.6708	15.6864	17.8552	17.7334	17.1489	17.4375	17.459
2846	372	B2RQK7_TPPPMAPK_1xPhospho [T1(100)]_1xPhospho [T1(100)]	B2RQK7	Synpo2l	5	5	21.2327	21.6759	21.4543	0.0594767	0.735521	-1.35958	12Mo-KO_1Way down vs WT	-1.87746	1.01569	-0.443163	B2RQK7	TPPPMAPK	1xPhospho [T1(100)]	1xPhospho [T1(100)]	NP_001297360	0.0621206	0.00104129	Synpo2l	synaptopodin 2-like	68760	Synpo2l	14|14 A3	protein-coding	-1σ	21.5303	21.4257	22.3743	21.6853	21.3639	21.3675	21.2732	21.4198	20.9375	21.1656
3254	373	F6ZGN3_SRLEPDSEDDDRK_1xPhospho [S7(100)]_1xPhospho [S1(0); S7(100)]	F6ZGN3	---	5	5	20.0138	18.8822	19.448	0.0595019	2.19105	2.19105	12Mo-KO_1Way up vs WT	-1.04066	4.99591	1.13163	F6ZGN3	SRLEPDSEDDDRK	1xPhospho [S7(100)]	1xPhospho [S1(0); S7(100)]	---	0.0120007	0	Myo18a	myosin XVIIIA	360013	Myo18a	11|11 B5	protein-coding	+3σ	17.7796	19.3064	17.9618	19.5602	19.8029	19.7026	21.0957	19.3126	19.9215	20.0366
2937	374	E9Q0S6_QVMGPSGPGFHGNVVSGHPASAATTPGSPSLGR_1xPhospho [S28(84.3)]_1xPhospho [S6(0); S16(0); S21(0); T24(0); T25(0); S28(84.3); S30(15.7)]	E9Q0S6	Tns1	5	5	18.4128	19.5912	19.002	0.0597238	0.441843	-2.26324	12Mo-KO_1Way down vs WT	-5.34433	1.04335	-1.17839	E9Q0S6	QVMGPSGPGFHGNVVSGHPASAATTPGSPSLGR	1xPhospho [S28(84.3)]	1xPhospho [S6(0); S16(0); S21(0); T24(0); T25(0); S28(84.3); S30(15.7)]	NP_082160	0.00122925	0	Tns1	tensin 1	21961	Tns1	1 C3|1 38.17 cM	protein-coding	-3σ	19.887	19.1848	20.2595	19.5149	19.1097	18.2945	17.5051	19.4558	17.1966	19.6118
2386	375	E9Q401_RISQTSQVSIDAAHGYSPR_1xDeamidated [Q]; 2xPhospho [T5(97.2); S/Y]_1xDeamidated [Q4; Q7]; 2xPhospho [S3(1.9); T5(97.2); S6(50.5); S9(50.5); Y16(0); S17(0)]	E9Q401	Ryr2	5	5	18.3622	15.0481	16.7051	0.0597419	9.94592	9.94592	12Mo-KO_1Way up vs WT	-1.127	111.485	3.31411	E9Q401	RISQTSQVSIDAAHGYSPR	1xDeamidated [Q]; 2xPhospho [T5(97.2); S/Y]	1xDeamidated [Q4; Q7]; 2xPhospho [S3(1.9); T5(97.2); S6(50.5); S9(50.5); Y16(0); S17(0)]	NP_076357	4.52801e-05	0	Ryr2	ryanodine receptor 2, cardiac	20191	Ryr2	13 A1|13 4.38 cM	protein-coding	+6σ	19.0305	12.7786	15.1624	14.3103	13.9585	19.2286	14.085	19.4531	19.3807	19.6634
1998	376	G5DDB7_LGGLLPAGGENGPEATDVSDEDEAAEMEDEAVR_1xPhospho [S19(100)]_1xPhospho [T16(0); S19(100)]	G5DDB7	Plcd1	5	5	18.1813	17.4935	17.8374	0.0603562	1.61076	1.61076	12Mo-KO_1Way up vs WT	-1.02667	2.66374	0.687744	G5DDB7	LGGLLPAGGENGPEATDVSDEDEAAEMEDEAVR	1xPhospho [S19(100)]	1xPhospho [T16(0); S19(100)]	NP_001280577	0.00116658	0	Plcd1	phospholipase C, delta 1	18799	Plcd1	9|9 F3	protein-coding	+2σ	17.1279	17.964	17.5023	17.1178	17.7558	17.9424	17.6355	18.9067	18.7271	17.6947
318	377	O88738_LEGDSDDLLEDSDSEEHSR_1xPhospho [S12(98.3)]_1xPhospho [S5(0); S12(98.3); S14(1.6); S18(0)]	O88738	Birc6	5	5	17.9358	17.4652	17.7005	0.060511	1.38565	1.38565	12Mo-KO_1Way up vs WT	-1.01843	1.95543	0.470567	O88738	LEGDSDDLLEDSDSEEHSR	1xPhospho [S12(98.3)]	1xPhospho [S5(0); S12(98.3); S14(1.6); S18(0)]	NP_031592	0.00655898	0	Birc6	baculoviral IAP repeat-containing 6	12211	Birc6	17|17 E2	protein-coding	+1σ	17.1247	17.2083	17.8267	17.6246	17.5417	18.1338	17.8448	17.3037	18.2006	18.1959
2679	378	Q5U4C3_APSPAPAVSPK_2xPhospho [S3(100); S9(100)]_2xPhospho [S3(100); S9(100)]	Q5U4C3	Scaf1	5	5	17.5509	17.7808	17.6658	0.0605313	0.852645	-1.17282	12Mo-KO_1Way down vs WT	-1.38787	1.00898	-0.229983	Q5U4C3	APSPAPAVSPK	2xPhospho [S3(100); S9(100)]	2xPhospho [S3(100); S9(100)]	NP_001008422	0.09029	0.00233529	Scaf1	SR-related CTD-associated factor 1	233208	Scaf1	7|7 B3	protein-coding	-0.5σ	17.5058	17.6996	17.9975	17.6902	18.011	17.6016	17.6745	17.5353	17.4516	17.4912
2036	379	A0A0U1RPA0_HGSPTAPIGAGSPEFTEQGR_1xPhospho [T5(98.6)]_1xPhospho [S3(1.4); T5(98.6); S12(0); T16(0)]	A0A0U1RPA0	---	5	5	18.9286	17.1104	18.0195	0.0605361	3.52635	3.52635	12Mo-KO_1Way up vs WT	-1.0733	13.3466	1.81817	A0A0U1RPA0	HGSPTAPIGAGSPEFTEQGR	1xPhospho [T5(98.6)]	1xPhospho [S3(1.4); T5(98.6); S12(0); T16(0)]	---	8.20625e-05	0	Plekha7	pleckstrin homology domain containing, family A member 7	233765	Plekha7	7|7 F1	protein-coding	+6σ	15.8125	16.3381	15.3326	19.3192	18.7498	18.299	19.4491	18.684	18.9181	19.2929
3194	380	Q3U1U6_SSFQITSVTTDYEGPGSPGASDSPVPPALAGPPPR_1xDeamidated [Q4]; 1xPhospho [S1(78.9)]_1xDeamidated [Q4]; 1xPhospho [S1(78.9); S2(18.7); T6(0.3); S7(0.3); T9(0); T10(0); Y12(0); S17(1.2); S21(0.3); S23(0.3)]	Q3U1U6	Tsc22d4	5	5	16.5447	16.0242	16.2844	0.0605837	1.43441	1.43441	12Mo-KO_1Way up vs WT	-1.02055	2.09981	0.520461	Q3U1U6	SSFQITSVTTDYEGPGSPGASDSPVPPALAGPPPR	1xDeamidated [Q4]; 1xPhospho [S1(78.9)]	1xDeamidated [Q4]; 1xPhospho [S1(78.9); S2(18.7); T6(0.3); S7(0.3); T9(0); T10(0); Y12(0); S17(1.2); S21(0.3); S23(0.3)]	NP_084081	0.0041347	0	Tsc22d4	TSC22 domain family, member 4	78829	Tsc22d4	5|5 G2	protein-coding	+1σ	16.7603	15.8341	15.7358	16.0842	15.7065	16.7847	16.4177	16.2859	16.2859	16.9491
1378	381	D3Z183_IPVPSSPVPIATIDLVQQQTEDVMPR_1xPhospho [S/T]_1xPhospho [S5(50); S6(50); T12(0); T20(0)]	D3Z183	Mfsd6	5	5	16.7172	17.0796	16.8984	0.0606674	0.777895	-1.28552	12Mo-KO_1Way down vs WT	-1.67631	1.01437	-0.362352	D3Z183	IPVPSSPVPIATIDLVQQQTEDVMPR	1xPhospho [S/T]	1xPhospho [S5(50); S6(50); T12(0); T20(0)]	NP_598590	0.0177259	0	Mfsd6	major facilitator superfamily domain containing 6	98682	Mfsd6	1|1 C1.1	protein-coding	-1σ	17.553	16.8566	16.7855	17.2349	16.968	16.5607	17.0337	16.6455	16.7754	16.5708
908	382	Q9QZN4_RASDSNTHEGFFWQGLWQR_1xPhospho [S3(99.8)]_1xPhospho [S3(99.8); S5(0.2); T7(0)]	Q9QZN4	Fbxo6	5	5	15.5569	16.5623	16.0596	0.0607377	0.498129	-2.00751	12Mo-KO_1Way down vs WT	-4.19389	1.04064	-1.00541	Q9QZN4	RASDSNTHEGFFWQGLWQR	1xPhospho [S3(99.8)]	1xPhospho [S3(99.8); S5(0.2); T7(0)]	NP_001157176	0.168498	0.00561503	Fbxo6	F-box protein 6	50762	Fbxo6	4 E2|4 78.67 cM	protein-coding	-2σ	16.6174	16.2783	15.3678	17.8702	16.6776	15.9333	15.4697	16.0796	15.5131	14.7887
2230	383	Q80U58_QASPTEVVER_1xPhospho [S3(100)]_1xPhospho [S3(100); T5(0)]	Q80U58	Pum2	5	5	16.9466	17.184	17.0653	0.0609172	0.848265	-1.17888	12Mo-KO_1Way down vs WT	-1.4031	1.0096	-0.237413	Q80U58	QASPTEVVER	1xPhospho [S3(100)]	1xPhospho [S3(100); T5(0)]	NP_001153691	0.0238064	0.000280731	Pum2	pumilio RNA-binding family member 2	80913	Pum2	12|12 A1.1	protein-coding	-0.5σ	17.4323	16.896	17.1851	17.0438	17.3625	17.1037	16.9836	16.8855	16.844	16.916
1057	384	O08582_SRSPVDSPVPASMFAPEPSSPGAAR_2xPhospho [S1(94.6); S19(82.6)]_2xPhospho [S1(94.6); S3(4.4); S7(1); S12(0.1); S19(82.6); S20(17.4)]	O08582	Gtpbp1	5	5	19.8578	20.1849	20.0214	0.061506	0.797155	-1.25446	12Mo-KO_1Way down vs WT	-1.59562	1.01394	-0.327068	O08582	SRSPVDSPVPASMFAPEPSSPGAAR	2xPhospho [S1(94.6); S19(82.6)]	2xPhospho [S1(94.6); S3(4.4); S7(1); S12(0.1); S19(82.6); S20(17.4)]	NP_038846	0.135539	0.00385156	Gtpbp1	GTP binding protein 1	14904	Gtpbp1	15|15 E1	protein-coding	-1σ	20.1976	20.1258	20.0484	20.0811	20.4716	19.7408	19.9769	19.8838	20.2368	19.451
1268	385	A2AH75_SNSLNNGQPK_1xDeamidated [N/Q]; 1xPhospho [S3(100)]_1xDeamidated [N2; N5; N6; Q8]; 1xPhospho [S1(0); S3(100)]	A2AH75	Kif1b	5	5	12.8555	13.7676	13.3116	0.0615417	0.531402	-1.88181	12Mo-KO_1Way down vs WT	-3.68108	1.03949	-0.912123	A2AH75	SNSLNNGQPK	1xDeamidated [N/Q]; 1xPhospho [S3(100)]	1xDeamidated [N2; N5; N6; Q8]; 1xPhospho [S1(0); S3(100)]	NP_032467	0.0150789	0	Kif1b	kinesin family member 1B	16561	Kif1b	4 E2|4 79.05 cM	protein-coding	-2σ	13.4008	13.7889	13.6073	14.1162	13.9248	12.4756	13.5546	11.446	13.4411	13.3602
683	386	P47713_HIVSNDSSDSDDEAQGPK_1xPhospho [S10(99.9)]_1xPhospho [S4(0); S7(0); S8(0.1); S10(99.9)]	P47713	Pla2g4a	5	5	17.9126	18.1888	18.0507	0.0617662	0.825799	-1.21095	12Mo-KO_1Way down vs WT	-1.48402	1.01202	-0.276138	P47713	HIVSNDSSDSDDEAQGPK	1xPhospho [S10(99.9)]	1xPhospho [S4(0); S7(0); S8(0.1); S10(99.9)]	NP_032895	2.32639e-05	0	Pla2g4a	phospholipase A2, group IVA (cytosolic, calcium-dependent)	18783	Pla2g4a	1 G1|1 63.51 cM	protein-coding	-1σ	18.4255	17.92	18.193	18.3894	18.0161	17.6658	18.0406	17.9014	18.1181	17.8373
2109	387	Q9R0Q7_DWEDDSDEDMSNFDR_1xOxidation [M10]; 1xPhospho [S6(100)]_1xOxidation [M10]; 1xPhospho [S6(100); S11(0)]	Q9R0Q7	Ptges3	5	5	17.6154	18.5198	18.0676	0.0618961	0.534264	-1.87174	12Mo-KO_1Way down vs WT	-3.64468	1.04033	-0.904377	Q9R0Q7	DWEDDSDEDMSNFDR	1xOxidation [M10]; 1xPhospho [S6(100)]	1xOxidation [M10]; 1xPhospho [S6(100); S11(0)]	NP_062740	0.000568807	0	Ptges3	prostaglandin E synthase 3	56351	Ptges3	10|10 D3	protein-coding	-2σ	18.537	18.8609	18.5203	18.9043	17.7766	17.4096	16.8855	18.8955	17.8829	17.0036
741	388	Q64511_KASGSENEGDYNPGR_2xPhospho [S3(100); S5(100)]_2xPhospho [S3(100); S5(100); Y11(0)]	Q64511	Top2b	5	5	16.6887	17.2439	16.9663	0.0620154	0.680577	-1.46934	12Mo-KO_1Way down vs WT	-2.21252	1.02481	-0.555169	Q64511	KASGSENEGDYNPGR	2xPhospho [S3(100); S5(100)]	2xPhospho [S3(100); S5(100); Y11(0)]	NP_033435	0.00973432	0	Top2b	topoisomerase (DNA) II beta	21974	Top2b	14|14 A1	protein-coding	-2σ	17.2115	17.2226	17.6305	17.4399	16.715	16.608	16.5857	17.0147	17.2129	16.0222
603	389	P49586_TSPSSSPASLSR_1xPhospho [S2(99.2)]_1xPhospho [T1(0.8); S2(99.2); S4(0); S5(0); S6(0); S9(0); S11(0)]	P49586	Pcyt1a	5	5	19.3185	19.5373	19.4279	0.0620531	0.859298	-1.16374	12Mo-KO_1Way down vs WT	-1.36747	1.00973	-0.21877	P49586	TSPSSSPASLSR	1xPhospho [S2(99.2)]	1xPhospho [T1(0.8); S2(99.2); S4(0); S5(0); S6(0); S9(0); S11(0)]	NP_001156631	0.0490415	0.000921163	Pcyt1a	phosphate cytidylyltransferase 1, choline, alpha isoform	13026	Pcyt1a	16 B3|16 22.69 cM	protein-coding	-0.5σ	19.6302	19.3117	19.4014	19.7352	19.6079	19.4057	19.3332	19.4742	19.0994	19.2801
365	390	Q9D6W8_RGSPGGVEMNVELPQQEGDDDDDEDEEAAAGR_2xDeamidated [Q15; Q/N]; 1xPhospho [S3(100)]_2xDeamidated [N10; Q15; Q16]; 1xPhospho [S3(100)]	Q9D6W8	Borcs6	5	5	16.8501	16.2406	16.5453	0.0622385	1.52574	1.52574	12Mo-KO_1Way up vs WT	-1.02776	2.39251	0.609514	Q9D6W8	RGSPGGVEMNVELPQQEGDDDDDEDEEAAAGR	2xDeamidated [Q15; Q/N]; 1xPhospho [S3(100)]	2xDeamidated [N10; Q15; Q16]; 1xPhospho [S3(100)]	NP_082281	0.00115005	0	Borcs6	BLOC-1 related complex subunit 6	71923	Borcs6	11|11 B3	protein-coding	+2σ	16.7325	15.6922	16.1555	16.5683	16.0546	16.6851	17.6582	16.782	16.4177	16.7076
2583	391	Q61165_SKEPSSPGTDDVFTPGSSDSPSSQR_1xDeamidated [Q24]; 1xPhospho [S/T]_1xDeamidated [Q24]; 1xPhospho [S1(0); S5(0); S6(0); T9(0); T14(0); S17(0); S18(0.1); S20(45.3); S22(45.3); S23(9.3)]	Q61165	Slc9a1	5	5	19.8362	19.4705	19.6533	0.0622678	1.28853	1.28853	12Mo-KO_1Way up vs WT	-1.0166	1.68789	0.365732	Q61165	SKEPSSPGTDDVFTPGSSDSPSSQR	1xDeamidated [Q24]; 1xPhospho [S/T]	1xDeamidated [Q24]; 1xPhospho [S1(0); S5(0); S6(0); T9(0); T14(0); S17(0); S18(0.1); S20(45.3); S22(45.3); S23(9.3)]	NP_058677	0.00625428	0	Slc9a1	solute carrier family 9 (sodium/hydrogen exchanger), member 1	20544	Slc9a1	4 D2.3|4 66.25 cM	protein-coding	+1σ	19.7274	19.216	19.2047	19.3686	19.8358	20.0204	19.8423	19.858	19.44	20.0204
1613	392	Q9QVP4_QAQRGSSNVFSMFEQAQIQEFK_1xDeamidated [Q/N]; 2xPhospho [S6(100); S7(100)]_1xDeamidated [Q1; Q3; N8; Q15; Q17; Q19]; 2xPhospho [S6(100); S7(100); S11(0)]	Q9QVP4	Myl7	5	5	16.4457	15.9649	16.2053	0.0630442	1.3955	1.3955	12Mo-KO_1Way up vs WT	-1.02322	1.99265	0.480785	Q9QVP4	QAQRGSSNVFSMFEQAQIQEFK	1xDeamidated [Q/N]; 2xPhospho [S6(100); S7(100)]	1xDeamidated [Q1; Q3; N8; Q15; Q17; Q19]; 2xPhospho [S6(100); S7(100); S11(0)]	NP_075017	0.000885306	0	Myl7	myosin, light polypeptide 7, regulatory	17898	Myl7	11 A1|11 3.88 cM	protein-coding	+1σ	16.0546	15.4959	15.73	16.3931	16.1512	15.8836	16.4066	16.8322	16.5857	16.5204
3201	393	Q7TQD2_AANKTPPKSPGDPAR_2xPhospho [T5(100); S9(100)]_2xPhospho [T5(100); S9(100)]	Q7TQD2	Tppp	5	5	19.0559	18.4233	18.7396	0.0635688	1.55031	1.55031	12Mo-KO_1Way up vs WT	-1.03186	2.48004	0.632561	Q7TQD2	AANKTPPKSPGDPAR	2xPhospho [T5(100); S9(100)]	2xPhospho [T5(100); S9(100)]	NP_878259	0.0415324	0.000734311	Tppp	tubulin polymerization promoting protein	72948	Tppp	13|13 C1	protein-coding	+2σ	18.2557	18.0715	17.9998	18.805	18.9845	18.8849	19.5994	18.4424	18.8553	19.4972
2444	394	Q52KI8_KETESEAEDDNLDDLER_2xPhospho [T3(100); S5(100)]_2xPhospho [T3(100); S5(100)]	Q52KI8	Srrm1	5	5	17.3984	18.0501	17.7243	0.0638966	0.636564	-1.57094	12Mo-KO_1Way down vs WT	-2.55076	1.0336	-0.651624	Q52KI8	KETESEAEDDNLDDLER	2xPhospho [T3(100); S5(100)]	2xPhospho [T3(100); S5(100)]	NP_058079	0.00068802	0	Srrm1	serine/arginine repetitive matrix 1	51796	Srrm1	4|4 D3	protein-coding	-2σ	18.44	17.2416	18.13	18.5227	17.9161	17.2699	17.9183	17.6448	17.4225	16.7367
3095	395	A2ASS6_MSPAMSPAR_1xPhospho [S6(100)]_1xPhospho [S2(0); S6(100)]	A2ASS6	---	5	5	19.1333	19.5435	19.3384	0.0640685	0.752542	-1.32883	12Mo-KO_1Way down vs WT	-1.80335	1.02127	-0.410156	A2ASS6	MSPAMSPAR	1xPhospho [S6(100)]	1xPhospho [S2(0); S6(100)]	---	0.0785377	0.00161377	Ttn	titin	22138	Ttn	2 C3|2 45.13 cM	protein-coding	-1σ	20.0023	19.3857	19.2712	19.4392	19.619	19.206	19.3465	18.8972	18.7237	19.4931
1356	396	Q9JKS4_ASPGALEFGDTFSSSFSQTSVCSPLMEASGPVLPLGSPVAK_1xCarbamidomethyl [C22]; 1xPhospho [S2(100)]_1xCarbamidomethyl [C22]; 1xPhospho [S2(100); T11(0); S13(0); S14(0); S15(0); S17(0); T19(0); S20(0); S23(0); S29(0); S37(0)]	Q9JKS4	Ldb3	5	5	20.5309	20.0809	20.3059	0.0642236	1.36601	1.36601	12Mo-KO_1Way up vs WT	-1.02361	1.91002	0.449964	Q9JKS4	ASPGALEFGDTFSSSFSQTSVCSPLMEASGPVLPLGSPVAK	1xCarbamidomethyl [C22]; 1xPhospho [S2(100)]	1xCarbamidomethyl [C22]; 1xPhospho [S2(100); T11(0); S13(0); S14(0); S15(0); S17(0); T19(0); S20(0); S23(0); S29(0); S37(0)]	NP_001034160	0.00029224	0	Ldb3	LIM domain binding 3	24131	Ldb3	14|14 B	protein-coding	+1σ	19.3995	20.2798	20.166	20.2845	20.2748	20.1609	20.7842	20.56	20.3699	20.7795
2012	397	Q3TUQ5_QESDPEDDDVKKPALQSSVVATSK_1xPhospho [S3(100)]_1xPhospho [S3(100); S17(0); S18(0); T22(0); S23(0)]	Q3TUQ5	Pnn	5	5	17.7603	16.7984	17.2794	0.0642547	1.94789	1.94789	12Mo-KO_1Way up vs WT	-1.05125	3.98875	0.961913	Q3TUQ5	QESDPEDDDVKKPALQSSVVATSK	1xPhospho [S3(100)]	1xPhospho [S3(100); S17(0); S18(0); T22(0); S23(0)]	NP_032917	0.0299128	0.00049971	Pnn	pinin	18949	Pnn	12 C1|12 26.0 cM	protein-coding	+2σ	17.5227	15.4989	16.8811	16.614	17.4755	17.8349	17.8703	16.7754	18.1417	18.1794
479	398	E9QLJ0_LSDEDEEGKTK_1xPhospho [S2(100)]_1xPhospho [S2(100); T10(0)]	E9QLJ0	Cmya5	5	5	15.9171	16.6513	16.2842	0.0644007	0.601144	-1.6635	12Mo-KO_1Way down vs WT	-2.8759	1.03927	-0.734218	E9QLJ0	LSDEDEEGKTK	1xPhospho [S2(100)]	1xPhospho [S2(100); T10(0)]	NP_076310	0.0800165	0.00161377	Cmya5	cardiomyopathy associated 5	76469	Cmya5	13|13 C3	protein-coding	-2σ	16.5055	16.5644	15.9521	17.717	16.5176	16.4732	15.8866	16.1679	15.5173	15.5405
2564	399	Q8CI12_SQSFGVASASSIK_1xPhospho [S3(100)]_1xPhospho [S1(0); S3(100); S8(0); S10(0); S11(0)]	Q8CI12	Smtnl2	5	5	17.5627	16.8878	17.2252	0.0645069	1.59651	1.59651	12Mo-KO_1Way up vs WT	-1.0363	2.64136	0.674918	Q8CI12	SQSFGVASASSIK	1xPhospho [S3(100)]	1xPhospho [S1(0); S3(100); S8(0); S10(0); S11(0)]	NP_808444	0.0309256	0.00049971	Smtnl2	smoothelin-like 2	276829	Smtnl2	11|11 B4	protein-coding	+2σ	16.6155	16.4961	17.3938	17.3838	16.5497	17.6478	17.2115	16.925	18.3266	17.7027
3121	400	Q8BGW8_SCLDVMYQVYGPPQPYFAAAYTPYHQK_1xCarbamidomethyl [C2]; 1xDeamidated [Q8]; 2xPhospho [T22(98.9); Y/S]_1xCarbamidomethyl [C2]; 1xDeamidated [Q8]; 2xPhospho [S1(0.1); Y7(0.1); Y10(0.1); Y16(6.5); Y21(47.2); T22(98.9); Y24(47.2)]	Q8BGW8	Vgll2	5	5	17.5818	16.7688	17.1753	0.0647289	1.75689	1.75689	12Mo-KO_1Way up vs WT	-1.04455	3.22414	0.81302	Q8BGW8	SCLDVMYQVYGPPQPYFAAAYTPYHQK	1xCarbamidomethyl [C2]; 1xDeamidated [Q8]; 2xPhospho [T22(98.9); Y/S]	1xCarbamidomethyl [C2]; 1xDeamidated [Q8]; 2xPhospho [S1(0.1); Y7(0.1); Y10(0.1); Y16(6.5); Y21(47.2); T22(98.9); Y24(47.2)]	NP_001287886	0.204841	0.00864922	Vgll2	vestigial like family member 2	215031	Vgll2	10|10 B3	protein-coding	+2σ	16.4214	16.4109	16.2822	16.9274	17.8022	17.0253	18.1313	16.9056	17.9706	17.8762
1506	401	P53986_LKSKESLQEAGK_2xPhospho [S3(100); S6(100)]_2xPhospho [S3(100); S6(100)]	P53986	Slc16a1	5	5	22.993	22.105	22.549	0.0652865	1.85056	1.85056	12Mo-KO_1Way up vs WT	-1.05055	3.59768	0.887964	P53986	LKSKESLQEAGK	2xPhospho [S3(100); S6(100)]	2xPhospho [S3(100); S6(100)]	NP_033222	0.000893769	0	Slc16a1	solute carrier family 16 (monocarboxylic acid transporters), member 1	20501	Slc16a1	3|3 F2.2	protein-coding	+2σ	20.8544	22.7637	21.4165	22.625	22.8656	22.6645	23.03	23.1056	23.1056	23.0594
3267	402	Q9JMH9_IGDLQAAIEDEMESDENEDLINSLQDMVTK_1xDeamidated [Q/N]; 1xPhospho [S14(100)]_1xDeamidated [Q5; N17; N22; Q25]; 1xPhospho [S14(100); S23(0); T29(0)]	Q9JMH9	Myo18a	5	5	15.7946	13.4633	14.6289	0.0656898	5.03236	5.03236	12Mo-KO_1Way up vs WT	-1.1419	28.9183	2.33123	Q9JMH9	IGDLQAAIEDEMESDENEDLINSLQDMVTK	1xDeamidated [Q/N]; 1xPhospho [S14(100)]	1xDeamidated [Q5; N17; N22; Q25]; 1xPhospho [S14(100); S23(0); T29(0)]	NP_001278141	0.000160486	0	Myo18a	myosin XVIIIA	360013	Myo18a	11|11 B5	protein-coding	+6σ	13.857	15.3448	13.7889	12.8799	11.446	14.6423	19.263	14.4035	15.3749	15.2892
2333	403	Q9ES28_KPSDEEFAVR_1xPhospho [S3(100)]_1xPhospho [S3(100)]	Q9ES28	Arhgef7	5	5	18.1899	17.8099	17.9999	0.0657889	1.30132	1.30132	12Mo-KO_1Way up vs WT	-1.022	1.7307	0.379981	Q9ES28	KPSDEEFAVR	1xPhospho [S3(100)]	1xPhospho [S3(100)]	NP_001106989	0.114652	0.00309639	Arhgef7	Rho guanine nucleotide exchange factor (GEF7)	54126	Arhgef7	8|8 A1.1	protein-coding	+1σ	17.2431	18.1484	17.9889	17.6863	17.983	18.0191	18.4038	18.3514	18.0608	18.1145
278	404	S4R2L4_LNSSENGEDR_1xDeamidated [N6]; 1xPhospho [S3(89.2)]_1xDeamidated [N6]; 1xPhospho [S3(89.2); S4(10.8)]	S4R2L4	Rsrc2	5	5	13.9007	14.4177	14.1592	0.0665926	0.698832	-1.43096	12Mo-KO_1Way down vs WT	-2.11218	1.03152	-0.516983	S4R2L4	LNSSENGEDR	1xDeamidated [N6]; 1xPhospho [S3(89.2)]	1xDeamidated [N6]; 1xPhospho [S3(89.2); S4(10.8)]	NP_001005525	0.0732206	0.00144181	Rsrc2	arginine/serine-rich coiled-coil 2	208606	Rsrc2	5|5 F	protein-coding	-1σ	14.2775	14.3872	14.8317	14.3872	14.2049	14.085	13.8284	13.0957	14.1441	14.3504
793	405	A2AFQ0_ESNQPPEDSSPPASSESSSTR_1xPhospho [S10(87.7)]_1xPhospho [S2(0); S9(12.3); S10(87.7); S14(0); S15(0); S17(0); S18(0); S19(0); T20(0)]	A2AFQ0	Huwe1	5	5	15.6284	16.1628	15.8956	0.0666846	0.690446	-1.44834	12Mo-KO_1Way down vs WT	-2.16642	1.03277	-0.5344	A2AFQ0	ESNQPPEDSSPPASSESSSTR	1xPhospho [S10(87.7)]	1xPhospho [S2(0); S9(12.3); S10(87.7); S14(0); S15(0); S17(0); S18(0); S19(0); T20(0)]	NP_067498	0.0188567	0	Huwe1	HECT, UBA and WWE domain containing 1	59026	Huwe1	X|X F3	protein-coding	-1σ	16.3195	16.1052	16.1183	16.5176	15.7534	15.1501	15.9333	16.2567	15.1501	15.652
84	406	E9QK41_QSLGESPR_1xPhospho [S6(100)]_1xPhospho [S2(0); S6(100)]	E9QK41	Ablim1	5	5	18.896	19.3171	19.1065	0.0672453	0.746853	-1.33895	12Mo-KO_1Way down vs WT	-1.84041	1.02656	-0.421104	E9QK41	QSLGESPR	1xPhospho [S6(100)]	1xPhospho [S2(0); S6(100)]	NP_848803	0.0606736	0.00104129	Ablim1	actin-binding LIM protein 1	226251	Ablim1	19 D2|19 52.09 cM	protein-coding	-1σ	19.1057	19.5264	18.99	19.7183	19.2451	19.2265	18.9441	19.1945	18.5391	18.5758
3085	407	A2ASS6_TASPHFTVSK_2xPhospho [T1(100); S3(100)]_2xPhospho [T1(100); S3(100); T7(0); S9(0)]	A2ASS6	---	5	5	18.2136	17.8953	18.0544	0.0673968	1.24685	1.24685	12Mo-KO_1Way up vs WT	-1.02018	1.586	0.318287	A2ASS6	TASPHFTVSK	2xPhospho [T1(100); S3(100)]	2xPhospho [T1(100); S3(100); T7(0); S9(0)]	---	0.0265589	0.00049971	Ttn	titin	22138	Ttn	2 C3|2 45.13 cM	protein-coding	+1σ	17.734	17.946	17.6686	17.9216	18.2063	18.0437	17.9874	18.0453	18.4316	18.5599
1387	408	A2AJI0_SSQPSPTTVPASDSPPAK_1xPhospho [S/T]_1xPhospho [S1(50); S2(50); S5(0); T7(0); T8(0); S12(0); S14(0)]	A2AJI0	Map7d1	5	5	17.6278	18.0672	17.8475	0.0675932	0.737407	-1.3561	12Mo-KO_1Way down vs WT	-1.891	1.02827	-0.439467	A2AJI0	SSQPSPTTVPASDSPPAK	1xPhospho [S/T]	1xPhospho [S1(50); S2(50); S5(0); T7(0); T8(0); S12(0); S14(0)]	NP_659190	0.0022706	0	Map7d1	MAP7 domain containing 1	245877	Map7d1	4|4 D2.2	protein-coding	-1σ	17.9081	17.9161	18.7847	18.0264	17.7009	17.744	17.8626	17.6425	17.569	17.3207
470	409	E9QLJ0_SSNEPAVFSEDDEERESYSPAMTSVSEQSLSPSTTEK_1xDeamidated [Q/N]; 1xPhospho [S26(80.5)]_1xDeamidated [N3; Q28]; 1xPhospho [S1(0.6); S2(0.2); S9(6.4); S17(0.6); Y18(0); S19(0.2); T23(1.9); S24(1.9); S26(80.5); S29(6.4); S31(0.2); S33(0.6); T34(0.2); T35(0.1)ｪ'ﾖ$b*	E9QLJ0	Cmya5	5	5	18.3094	19.669	18.9892	0.0678939	0.389708	-2.56603	12Mo-KO_1Way down vs WT	-7.18755	1.09159	-1.35954	E9QLJ0	SSNEPAVFSEDDEERESYSPAMTSVSEQSLSPSTTEK	1xDeamidated [Q/N]; 1xPhospho [S26(80.5)]	1xDeamidated [N3; Q28]; 1xPhospho [S1(0.6); S2(0.2); S9(6.4); S17(0.6); Y18(0); S19(0.2); T23(1.9); S24(1.9); S26(80.5); S29(6.4); S31(0.2); S33(0.6); T34(0.2); T35(0.1)ｪ'ﾖ$b*	NP_076310	0.00146581	0	Cmya5	cardiomyopathy associated 5	76469	Cmya5	13|13 C3	protein-coding	-3σ	20.1299	19.3826	19.3192	20.2015	19.3117	15.9191	18.7009	19.3888	18.6643	18.874
2614	410	D3Z5J3; Q62417_DLSFCQAELEADLEK_1xCarbamidomethyl [C5]; 1xPhospho [S3(100)]_1xCarbamidomethyl [C5]; 1xPhospho [S3(100)]	D3Z5J3; Q62417	---	5	5	17.5635	17.8923	17.7279	0.0679242	0.796198	-1.25597	12Mo-KO_1Way down vs WT	-1.6113	1.02145	-0.328801	D3Z5J3; Q62417	DLSFCQAELEADLEK	1xCarbamidomethyl [C5]; 1xPhospho [S3(100)]	1xCarbamidomethyl [C5]; 1xPhospho [S3(100)]	---	0.00117773	0	Sorbs1	sorbin and SH3 domain containing 1	20411	Sorbs1	19 C3|19 34.25 cM	protein-coding	-1σ	17.9662	17.9998	17.6943	17.8864	17.9146	17.4661	17.4146	18.0129	17.7574	17.1662
954	411	A6ZI44_GILAADESTGSIAK_1xPhospho [S8(93.3)]_1xPhospho [S8(93.3); T9(6.3); S11(0.5)]	A6ZI44	Aldoa	5	5	21.8704	21.4014	21.6359	0.0679688	1.38415	1.38415	12Mo-KO_1Way up vs WT	-1.03082	1.97491	0.469002	A6ZI44	GILAADESTGSIAK	1xPhospho [S8(93.3)]	1xPhospho [S8(93.3); T9(6.3); S11(0.5)]	NP_001170778	0.000143854	0	Aldoa	aldolase A, fructose-bisphosphate	11674	Aldoa	7|7 F3	protein-coding	+1σ	20.7321	21.229	21.7057	21.9062	21.4341	21.7662	22.0785	21.592	21.8681	22.0472
1536	412	A0A0H2UH28_NSPGLLVSPGNLNK_1xPhospho [S2(100)]_1xPhospho [S2(100); S8(0)]	A0A0H2UH28	---	5	5	16.3793	16.5878	16.4836	0.0682509	0.86542	-1.15551	12Mo-KO_1Way down vs WT	-1.35361	1.01379	-0.208528	A0A0H2UH28	NSPGLLVSPGNLNK	1xPhospho [S2(100)]	1xPhospho [S2(100); S8(0)]	---	0.201355	0.00788275	Mef2c	myocyte enhancer factor 2C	17260	Mef2c	13 C3|13 43.68 cM	protein-coding	-0.5σ	16.5176	16.4933	16.8866	16.3987	16.6431	16.3518	16.2753	16.2967	16.5661	16.4066
145	413	Q9WTQ5_QAQSSTEIPLQAESGQGTEEEAAKDGEENR_1xDeamidated [N/Q]; 1xPhospho [S/T]_1xDeamidated [Q1; Q11; Q16; N29]; 1xPhospho [S4(69.5); S5(15.3); T6(15.3); S14(0); T18(0)]	Q9WTQ5	Akap12	5	5	18.3514	17.1899	17.7706	0.0683408	2.23691	2.23691	12Mo-KO_1Way up vs WT	-1.07964	5.4023	1.16151	Q9WTQ5	QAQSSTEIPLQAESGQGTEEEAAKDGEENR	1xDeamidated [N/Q]; 1xPhospho [S/T]	1xDeamidated [Q1; Q11; Q16; N29]; 1xPhospho [S4(69.5); S5(15.3); T6(15.3); S14(0); T18(0)]	NP_112462	0.00701066	0	Akap12	A kinase (PRKA) anchor protein (gravin) 12	83397	Akap12	10|10 A1	protein-coding	+3σ	15.6545	17.9313	16.5365	17.4698	18.3574	17.3441	18.596	18.773	18.5313	18.5125
837	414	Q99LC5_APSSSSVGISEWLDQK_1xPhospho [S4(88.6)]_1xPhospho [S3(10.1); S4(88.6); S5(1.2); S6(0.2); S10(0)]	Q99LC5	Etfa	5	5	17.2724	17.6982	17.4853	0.068421	0.744422	-1.34332	12Mo-KO_1Way down vs WT	-1.85615	1.02861	-0.425807	Q99LC5	APSSSSVGISEWLDQK	1xPhospho [S4(88.6)]	1xPhospho [S3(10.1); S4(88.6); S5(1.2); S6(0.2); S10(0)]	NP_663590	0.0060783	0	Etfa	electron transferring flavoprotein, alpha polypeptide	110842	Etfa	9|9 B	protein-coding	-1σ	18.1693	17.861	17.2385	17.8122	17.41	17.5176	17.5523	16.9635	17.2166	17.112
1595	415	Q3UIZ8_RSSNNGGMSAEEEIGSGAEPMR_1xDeamidated [N]; 2xPhospho [S2(84.9); S9(97.1)]_1xDeamidated [N4; N5]; 2xPhospho [S2(84.9); S3(18); S9(97.1); S16(0)]	Q3UIZ8	Mylk3	5	5	16.3324	15.649	15.9907	0.0685073	1.60597	1.60597	12Mo-KO_1Way up vs WT	-1.04653	2.69915	0.683447	Q3UIZ8	RSSNNGGMSAEEEIGSGAEPMR	1xDeamidated [N]; 2xPhospho [S2(84.9); S9(97.1)]	1xDeamidated [N4; N5]; 2xPhospho [S2(84.9); S3(18); S9(97.1); S16(0)]	NP_001284541	0.000324481	0	Mylk3	myosin light chain kinase 3	213435	Mylk3	8|8 C3	protein-coding	+2σ	15.241	16.4988	15.3382	15.6776	15.4892	15.6573	16.3803	16.3281	17.1179	16.1785
916	416	Q8CIB5_LSIMTSENHLNNSDKEVDEVDAALSDLEITLEGGK_1xDeamidated [N]; 1xPhospho [S6(82.4)]_1xDeamidated [N8; N11; N12]; 1xPhospho [S2(0.8); T5(16.7); S6(82.4); S13(0.2); S25(0); T30(0)]	Q8CIB5	Fermt2	5	5	15.6011	16.3921	15.9966	0.0685448	0.577946	-1.73027	12Mo-KO_1Way down vs WT	-3.15593	1.05415	-0.790995	Q8CIB5	LSIMTSENHLNNSDKEVDEVDAALSDLEITLEGGK	1xDeamidated [N]; 1xPhospho [S6(82.4)]	1xDeamidated [N8; N11; N12]; 1xPhospho [S2(0.8); T5(16.7); S6(82.4); S13(0.2); S25(0); T30(0)]	NP_666166	0.000786043	0	Fermt2	fermitin family member 2	218952	Fermt2	14|14 C1	protein-coding	-2σ	16.529	15.1624	16.9062	16.0623	17.3007	15.7892	15.5524	15.3749	15.6969	15.5921
3303	417	Q9R1Z8_LCDDGPQLPASPNPTTTAHLSSHSHPSSIPVDPTDWGGR_1xCarbamidomethyl [C2]; 1xDeamidated [N/Q]; 1xPhospho [S11(93.2)]_1xCarbamidomethyl [C2]; 1xDeamidated [Q7; N13]; 1xPhospho [S11(93.2); T15(6.5); T16(0.2); T17(0.1); S21(0); S22(0); S24(0); S27(0); S28(0); T34ｪ'ﾖ$b*	Q9R1Z8	Sorbs3	5	5	19.2072	18.7947	19.0009	0.0692425	1.331	1.331	12Mo-KO_1Way up vs WT	-1.02888	1.82273	0.412512	Q9R1Z8	LCDDGPQLPASPNPTTTAHLSSHSHPSSIPVDPTDWGGR	1xCarbamidomethyl [C2]; 1xDeamidated [N/Q]; 1xPhospho [S11(93.2)]	1xCarbamidomethyl [C2]; 1xDeamidated [Q7; N13]; 1xPhospho [S11(93.2); T15(6.5); T16(0.2); T17(0.1); S21(0); S22(0); S24(0); S27(0); S28(0); T34ｪ'ﾖ$b*	NP_035496	0.0107059	0	Sorbs3	sorbin and SH3 domain containing 3	20410	Sorbs3	14 D2|14 36.27 cM	protein-coding	+1σ	19.239	18.99	18.9235	18.3682	18.4528	18.8464	19.2675	19.2083	19.5056	19.2083
2664	418	Q62261_HDTSASTQSTPASSR_1xPhospho [S6(91.6)]_1xPhospho [T3(0); S4(0); S6(91.6); T7(8.4); S9(0); T10(0); S13(0); S14(0)]	Q62261	Sptbn1	5	5	16.304	16.5748	16.4394	0.0693454	0.828848	-1.20649	12Mo-KO_1Way down vs WT	-1.48323	1.01897	-0.27082	Q62261	HDTSASTQSTPASSR	1xPhospho [S6(91.6)]	1xPhospho [T3(0); S4(0); S6(91.6); T7(8.4); S9(0); T10(0); S13(0); S14(0)]	NP_033286	0.00504908	0	Sptbn1	spectrin beta, non-erythrocytic 1	20742	Sptbn1	11 A3.3|11 17.44 cM	protein-coding	-0.5σ	16.7647	16.5043	16.2783	16.6447	16.6819	16.5819	16.1537	16.2226	16.0796	16.482
2222	419	B2RUP2_VGVAEGSPVSR_1xPhospho [S10(100)]_1xPhospho [S7(0); S10(100)]	B2RUP2	Unc13d	5	5	17.7281	16.9911	17.3596	0.0694414	1.66672	1.66672	12Mo-KO_1Way up vs WT	-1.05271	2.92439	0.737015	B2RUP2	VGVAEGSPVSR	1xPhospho [S10(100)]	1xPhospho [S7(0); S10(100)]	NP_001009573	0.0603882	0.00104129	Unc13d	unc-13 homolog D	70450	Unc13d	11|11 E2	protein-coding	+2σ	16.1648	17.2786	16.4751	17.5543	17.4826	17.018	17.8846	17.744	17.6724	18.3214
1833	420	Q80XU3_SGKNSQEDSEDSEEKDVK_1xDeamidated [N/Q]; 1xPhospho [S12(96.8)]_1xDeamidated [N4; Q6]; 1xPhospho [S1(0); S5(0.5); S9(2.7); S12(96.8)]	Q80XU3	Nucks1	5	5	15.6996	14.9677	15.3337	0.0696405	1.66088	1.66088	12Mo-KO_1Way up vs WT	-1.05285	2.90433	0.731949	Q80XU3	SGKNSQEDSEDSEEKDVK	1xDeamidated [N/Q]; 1xPhospho [S12(96.8)]	1xDeamidated [N4; Q6]; 1xPhospho [S1(0); S5(0.5); S9(2.7); S12(96.8)]	NP_001139276	0.0976653	0.00244569	Nucks1	nuclear casein kinase and cyclin-dependent kinase substrate 1	98415	Nucks1	1|1 E4	protein-coding	+2σ	15.2604	15.3382	15.7186	14.5304	13.991	15.1549	15.8836	16.0457	15.5303	15.8836
34	421	Q3U3J1_SVDEVNYWDK_1xPhospho [S1(100)]_1xPhospho [S1(100); Y7(0)]	Q3U3J1	Bckdha	5	5	21.4131	21.6219	21.5175	0.0700551	0.865277	-1.1557	12Mo-KO_1Way down vs WT	-1.3558	1.01509	-0.208767	Q3U3J1	SVDEVNYWDK	1xPhospho [S1(100)]	1xPhospho [S1(100); Y7(0)]	NP_031559	0.0148652	0	Bckdha	branched chain ketoacid dehydrogenase E1, alpha polypeptide	12039	Bckdha	7|7 A3	protein-coding	-0.5σ	21.6975	21.5553	21.7785	21.7308	21.3472	21.5163	21.3125	21.2245	21.4612	21.5509
2103	422	A0A087WR45_ARSPPFHSR_1xPhospho [S3(100)]_1xPhospho [S3(100); S8(0)]	A0A087WR45	Prob1	5	5	17.6096	16.1343	16.8719	0.070386	2.78039	2.78039	12Mo-KO_1Way up vs WT	-1.1135	8.60801	1.47529	A0A087WR45	ARSPPFHSR	1xPhospho [S3(100)]	1xPhospho [S3(100); S8(0)]	NP_001257575	0.157022	0.00469354	Prob1	proline rich basic protein 1	381148	Prob1	18|18 B2	protein-coding	+3σ	15.4135	16.5399	13.8881	17.9618	16.8685	17.2461	17.9599	17.3166	17.7922	17.7334
849	423	D9J302_SEPVSVQKPTVTSVCSESAQELAEGQR_1xCarbamidomethyl [C15]; 1xPhospho [S/T]_1xCarbamidomethyl [C15]; 1xPhospho [S1(0); S5(0); T10(0); T12(0); S13(0); S16(50); S18(50)]	D9J302	Pdlim5	5	5	19.5005	19.8504	19.6755	0.0712536	0.784631	-1.27448	12Mo-KO_1Way down vs WT	-1.66796	1.02687	-0.349914	D9J302	SEPVSVQKPTVTSVCSESAQELAEGQR	1xCarbamidomethyl [C15]; 1xPhospho [S/T]	1xCarbamidomethyl [C15]; 1xPhospho [S1(0); S5(0); T10(0); T12(0); S13(0); S16(50); S18(50)]	NP_001177781	0.0136453	0	Pdlim5	PDZ and LIM domain 5	56376	Pdlim5	3|3 H1	protein-coding	-1σ	20.1258	19.7378	20.041	19.5476	19.7999	19.0994	19.6118	19.3255	19.8664	19.5994
2726	424	E9QQ25_RGSSAESALPR_2xPhospho [S3(100); S4(100)]_2xPhospho [S3(100); S4(100); S7(0)]	E9QQ25	Speg	5	5	18.481	17.7196	18.1003	0.0713016	1.69516	1.69516	12Mo-KO_1Way up vs WT	-1.05952	3.04462	0.761422	E9QQ25	RGSSAESALPR	2xPhospho [S3(100); S4(100)]	2xPhospho [S3(100); S4(100); S7(0)]	NP_031489	0.0109636	0	Speg	SPEG complex locus	11790	Speg	1 C4|1 38.88 cM	protein-coding	+2σ	16.7066	18.6311	18.1966	17.3952	17.6686	18.4792	18.7334	17.936	18.4187	18.838
808	425	G5E870_AQTAPTKTSPR_1xPhospho [T/S]_1xPhospho [T3(0); T6(0.5); T8(49.8); S9(49.8)]	G5E870	Trip12	5	5	13.208	12.1938	12.7009	0.0716125	2.01983	2.01983	12Mo-KO_1Way up vs WT	-1.0812	4.41097	1.01423	G5E870	AQTAPTKTSPR	1xPhospho [T/S]	1xPhospho [T3(0); T6(0.5); T8(49.8); S9(49.8)]	NP_598736	0.218385	0.00943619	Trip12	thyroid hormone receptor interactor 12	14897	Trip12	1|1 C5	protein-coding	+2σ	12.8799	11.446	12.2426	11.9236	12.477	11.9228	13.238	12.7776	14.4579	13.6439
1882	426	Q3B7Z2_TGSNISGASSDVSLDEQYK_2xPhospho [S3(86.1); S6(99)]_2xPhospho [T1(13.9); S3(86.1); S6(99); S9(0.5); S10(0.5); S13(0); Y18(0)]	Q3B7Z2	Osbp	5	5	15.9535	16.3765	16.165	0.0722494	0.745826	-1.34079	12Mo-KO_1Way down vs WT	-1.85891	1.03403	-0.423088	Q3B7Z2	TGSNISGASSDVSLDEQYK	2xPhospho [S3(86.1); S6(99)]	2xPhospho [T1(13.9); S3(86.1); S6(99); S9(0.5); S10(0.5); S13(0); Y18(0)]	NP_001028346	0.00524492	0	Osbp	oxysterol binding protein	76303	Osbp	19 A|19 8.58 cM	protein-coding	-1σ	17.0593	16.1013	16.0875	16.2966	16.3381	15.7793	16.2082	15.8318	16.1879	15.7602
2866	427	E9Q1U2_RGTGGDSGPEEDYLSLGAEACNFMQSSAK_1xCarbamidomethyl [C21]; 1xPhospho [S7(99.5)]_1xCarbamidomethyl [C21]; 1xPhospho [T3(0.5); S7(99.5); Y13(0); S15(0); S26(0); S27(0)]	E9Q1U2	Synpo2	5	5	16.7981	17.6801	17.2391	0.0727677	0.542645	-1.84283	12Mo-KO_1Way down vs WT	-3.64689	1.07387	-0.881921	E9Q1U2	RGTGGDSGPEEDYLSLGAEACNFMQSSAK	1xCarbamidomethyl [C21]; 1xPhospho [S7(99.5)]	1xCarbamidomethyl [C21]; 1xPhospho [T3(0.5); S7(99.5); Y13(0); S15(0); S26(0); S27(0)]	NP_536699	0.000356868	0	Synpo2	synaptopodin 2	118449	Synpo2	3|3 G1	protein-coding	-2σ	17.9046	17.6122	17.4361	17.7237	17.7237	16.7211	15.2241	17.1871	17.6502	17.2082
2631	428	D3Z0N2_KESFDSQSLINNQSK_1xPhospho [S3(100)]_1xPhospho [S3(100); S6(0); S8(0); S14(0)]	D3Z0N2	---	5	5	24.0933	24.2499	24.1716	0.0729279	0.897146	-1.11465	12Mo-KO_1Way down vs WT	-1.25836	1.01282	-0.156586	D3Z0N2	KESFDSQSLINNQSK	1xPhospho [S3(100)]	1xPhospho [S3(100); S6(0); S8(0); S14(0)]	---	4.00221e-06	0	Sorbs2	sorbin and SH3 domain containing 2	234214	Sorbs2	8|8 B1.1	protein-coding	-0.5σ	24.2903	24.0998	24.2903	24.4215	24.1477	23.9273	24.225	24.061	24.1517	24.1016
1469	429	P27546_KKPCLDTSQVEGIPSSKPTLLANGDHGMEGNNTAGSPTDFLEER_1xCarbamidomethyl [C4]; 2xDeamidated [Q/N]; 1xPhospho [T/S]_1xCarbamidomethyl [C4]; 2xDeamidated [Q9; N23; N31; N32]; 1xPhospho [T7(0); S8(0); S15(0.6); S16(0.6); T19(6.1); T33(70.5); S36(20.3); T38(1.9)]ｪ'ﾖ$b*	P27546	Map4	5	5	17.6748	18.212	17.9434	0.073382	0.68911	-1.45115	12Mo-KO_1Way down vs WT	-2.20166	1.04551	-0.537194	P27546	KKPCLDTSQVEGIPSSKPTLLANGDHGMEGNNTAGSPTDFLEER	1xCarbamidomethyl [C4]; 2xDeamidated [Q/N]; 1xPhospho [T/S]	1xCarbamidomethyl [C4]; 2xDeamidated [Q9; N23; N31; N32]; 1xPhospho [T7(0); S8(0); S15(0.6); S16(0.6); T19(6.1); T33(70.5); S36(20.3); T38(1.9)]ｪ'ﾖ$b*	NP_001192259	0.0249663	0.000280731	Map4	microtubule-associated protein 4	17758	Map4	9 F2|9 59.83 cM	protein-coding	-1σ	18.2028	18.1038	18.1693	18.872	17.7119	17.2842	17.3511	18.0389	18.1737	17.5259
1426	430	E9PVY8_LNSQESDEEPQISDVPHISK_2xPhospho [S3(100); S6(100)]_2xPhospho [S3(100); S6(100); S13(0); S19(0)]	E9PVY8	Macf1	5	5	17.6326	16.9338	17.2832	0.0734005	1.62317	1.62317	12Mo-KO_1Way up vs WT	-1.05965	2.79185	0.698817	E9PVY8	LNSQESDEEPQISDVPHISK	2xPhospho [S3(100); S6(100)]	2xPhospho [S3(100); S6(100); S13(0); S19(0)]	NP_001186065	0.0141746	0	Macf1	microtubule-actin crosslinking factor 1	11426	Macf1	4 D2.2|4 57.42 cM	protein-coding	+2σ	16.3063	17.3445	17.7146	16.1013	17.2022	17.3207	17.3999	17.6088	18.0775	17.756
1295	431	Q6ZQ58_ESPRPPAAAEAPAGSDGEDGGRR_1xPhospho [S15(100)]_1xPhospho [S2(0); S15(100)]	Q6ZQ58	Larp1	5	5	17.9054	16.889	17.3972	0.0735119	2.02289	2.02289	12Mo-KO_1Way up vs WT	-1.08833	4.45354	1.01642	Q6ZQ58	ESPRPPAAAEAPAGSDGEDGGRR	1xPhospho [S15(100)]	1xPhospho [S2(0); S15(100)]	NP_082727	0.0967692	0.00244569	Larp1	La ribonucleoprotein domain family, member 1	73158	Larp1	11|11 B1.3	protein-coding	+2σ	15.0871	17.0584	17.4263	17.3754	17.4977	17.729	17.9169	17.2968	18.3314	18.2529
179	432	Q9QYC0_SPGTPAGEGSGSPPK_1xPhospho [T4(100)]_1xPhospho [S1(0); T4(100); S10(0); S12(0)]	Q9QYC0	Add1	5	5	18.5853	18.8929	18.7391	0.0737404	0.80799	-1.23764	12Mo-KO_1Way down vs WT	-1.57186	1.02618	-0.307591	Q9QYC0	SPGTPAGEGSGSPPK	1xPhospho [T4(100)]	1xPhospho [S1(0); T4(100); S10(0); S12(0)]	NP_001019629	0.00297781	0	Add1	adducin 1 (alpha)	11518	Add1	5 B2|5 17.9 cM	protein-coding	-1σ	18.8942	18.4385	19.0305	19.1877	18.9136	18.688	18.6696	18.7805	18.3401	18.4484
1608	433	Q9QVP4_QAQRGSSNVFSMFEQAQIQEFK_2xPhospho [S6(100); S7(100)]_2xPhospho [S6(100); S7(100); S11(0)]	Q9QVP4	Myl7	5	5	21.607	21.0597	21.3333	0.0740865	1.46134	1.46134	12Mo-KO_1Way up vs WT	-1.04772	2.23743	0.547296	Q9QVP4	QAQRGSSNVFSMFEQAQIQEFK	2xPhospho [S6(100); S7(100)]	2xPhospho [S6(100); S7(100); S11(0)]	NP_075017	0.000885306	0	Myl7	myosin, light polypeptide 7, regulatory	17898	Myl7	11 A1|11 3.88 cM	protein-coding	+1σ	20.5134	21.3639	20.9103	21.301	21.2099	21.0957	21.6695	21.2115	22.3014	21.7568
1066	434	Q9CZJ2_TQESCGIAPLTPSQSPKPEAR_1xCarbamidomethyl [C5]; 2xPhospho [T11(99.8); S15(99.8)]_1xCarbamidomethyl [C5]; 2xPhospho [T1(0); S4(0); T11(99.8); S13(0.4); S15(99.8)]	Q9CZJ2	Hspa12b	5	5	19.1261	19.3431	19.2346	0.0742132	0.860376	-1.16228	12Mo-KO_1Way down vs WT	-1.37622	1.01874	-0.21696	Q9CZJ2	TQESCGIAPLTPSQSPKPEAR	1xCarbamidomethyl [C5]; 2xPhospho [T11(99.8); S15(99.8)]	1xCarbamidomethyl [C5]; 2xPhospho [T1(0); S4(0); T11(99.8); S13(0.4); S15(99.8)]	NP_082582	0.00403752	0	Hspa12b	heat shock protein 12B	72630	Hspa12b	2|2 F1	protein-coding	-0.5σ	19.5429	19.3633	19.374	19.2231	19.2121	19.0113	19.0543	19.2489	19.3981	18.9181
153	435	Q9WTQ5_RPSESDKEEELDK_1xPhospho [S3(98.6)]_1xPhospho [S3(98.6); S5(1.4)]	Q9WTQ5	Akap12	5	5	18.6655	17.7865	18.226	0.0745589	1.83908	1.83908	12Mo-KO_1Way up vs WT	-1.07921	3.65012	0.878983	Q9WTQ5	RPSESDKEEELDK	1xPhospho [S3(98.6)]	1xPhospho [S3(98.6); S5(1.4)]	NP_112462	0.0911297	0.00233529	Akap12	A kinase (PRKA) anchor protein (gravin) 12	83397	Akap12	10|10 A1	protein-coding	+2σ	17.2302	16.9891	17.5928	18.9422	18.1783	18.2072	19.0113	18.0171	18.7571	19.3349
164	436	Q61234_NSAGGTSVGWDSPPASPLQR_2xDeamidated [N1; Q19]; 1xPhospho [S12(100)]_2xDeamidated [N1; Q19]; 1xPhospho [S2(0); T6(0); S7(0); S12(100); S16(0)]	Q61234	---	5	5	16.7941	17.4049	17.0995	0.0747008	0.654807	-1.52717	12Mo-KO_1Way down vs WT	-2.45983	1.05471	-0.610859	Q61234	NSAGGTSVGWDSPPASPLQR	2xDeamidated [N1; Q19]; 1xPhospho [S12(100)]	2xDeamidated [N1; Q19]; 1xPhospho [S2(0); T6(0); S7(0); S12(100); S16(0)]	---	0.0001932	0	Snta1	syntrophin, acidic 1	20648	Snta1	2 H1|2 76.52 cM	protein-coding	-2σ	17.4755	17.0593	17.3625	17.8599	17.2673	17.2398	16.6442	15.8267	16.9812	17.2784
1786	437	P18608_QADVADQQTTELPAENGETENQSPASEEEKEAK_2xPhospho [S26(99.6); T/S]_2xPhospho [T9(23.4); T10(73.8); T19(0.3); S23(2.8); S26(99.6)]	P18608	Hmgn1	5	5	15.4656	16.5666	16.0161	0.0749323	0.466216	-2.14493	12Mo-KO_1Way down vs WT	-5.06848	1.10167	-1.10093	P18608	QADVADQQTTELPAENGETENQSPASEEEKEAK	2xPhospho [S26(99.6); T/S]	2xPhospho [T9(23.4); T10(73.8); T19(0.3); S23(2.8); S26(99.6)]	NP_032277	0.000596519	0	Hmgn1	high mobility group nucleosomal binding domain 1	15312	Hmgn1	16 C4|16 56.83 cM	protein-coding	-2σ	16.4352	15.4921	18.3362	16.2498	16.3195	16.2431	15.4176	14.6554	15.3364	15.6756
1530	438	O08539_SPSPPPDGSPAATPEIR_1xPhospho [S/T]_1xPhospho [S1(50); S3(50); S9(0); T13(0)]	O08539	Bin1	5	5	16.2925	17.0939	16.6932	0.0753042	0.573812	-1.74273	12Mo-KO_1Way down vs WT	-3.26208	1.07407	-0.80135	O08539	SPSPPPDGSPAATPEIR	1xPhospho [S/T]	1xPhospho [S1(50); S3(50); S9(0); T13(0)]	NP_033798	0.0708586	0.00104129	Bin1	bridging integrator 1	30948	Bin1	18 B1|18 18.01 cM	protein-coding	-2σ	17.0995	17.1903	17.0694	17.6349	16.4751	15.3553	16.1496	15.9657	17.4408	16.5512
2408	439	O55143_EFDELSPSAQR_1xPhospho [S8(98.1)]_1xPhospho [S6(1.9); S8(98.1)]	O55143	Atp2a2	5	5	26.7885	27.2389	27.0137	0.0754083	0.731855	-1.36639	12Mo-KO_1Way down vs WT	-1.94383	1.04114	-0.45037	O55143	EFDELSPSAQR	1xPhospho [S8(98.1)]	1xPhospho [S6(1.9); S8(98.1)]	NP_001103610	0.000659186	0	Atp2a2	ATPase, Ca++ transporting, cardiac muscle, slow twitch 2	11938	Atp2a2	5 62.38 cM|5 F	protein-coding	-1σ	27.5834	26.7221	26.7221	27.5834	27.5834	27.0451	26.7244	26.7244	26.7244	26.7244
1909	440	A0A0R4J0J0_SNGPTHTSPTRPTPQPR_1xPhospho [T10(97.8)]_1xPhospho [S1(0); T5(0); T7(0.3); S8(1.9); T10(97.8); T13(0)]	A0A0R4J0J0	Palmd	5	5	17.6935	16.7793	17.2364	0.0755244	1.88454	1.88454	12Mo-KO_1Way up vs WT	-1.08565	3.85568	0.914211	A0A0R4J0J0	SNGPTHTSPTRPTPQPR	1xPhospho [T10(97.8)]	1xPhospho [S1(0); T5(0); T7(0.3); S8(1.9); T10(97.8); T13(0)]	NP_075734	0.0111742	0	Palmd	palmdelphin	114301	Palmd	3 G1|3 50.49 cM	protein-coding	+2σ	15.327	16.3863	17.2048	17.7734	17.2048	17.7837	17.8865	17.1549	17.6999	17.9424
3216	441	Q3TIX9_EADEDSEPER_1xPhospho [S6(100)]_1xPhospho [S6(100)]	Q3TIX9	Usp39	5	5	15.5801	14.5093	15.0447	0.0755577	2.1006	2.1006	12Mo-KO_1Way up vs WT	-1.10117	4.85894	1.0708	Q3TIX9	EADEDSEPER	1xPhospho [S6(100)]	1xPhospho [S6(100)]	NP_613058	0.044813	0.000921163	Usp39	ubiquitin specific peptidase 39	28035	Usp39	6 C1|6 32.27 cM	protein-coding	+2σ	13.8305	15.7358	14.3872	13.0972	15.4959	15.9584	15.1111	15.2527	15.7892	15.7892
860	442	E9QAU4_SISPSPSAILER_1xPhospho [S3(78.9)]_1xPhospho [S1(10.5); S3(78.9); S5(10.5); S7(0.1)]	E9QAU4	Etl4	5	5	16.1501	15.5977	15.8739	0.0758221	1.46644	1.46644	12Mo-KO_1Way up vs WT	-1.05147	2.26112	0.552316	E9QAU4	SISPSPSAILER	1xPhospho [S3(78.9)]	1xPhospho [S1(10.5); S3(78.9); S5(10.5); S7(0.1)]	NP_001074475	0.220248	0.00972633	Etl4	enhancer trap locus 4	208618	Etl4	2 A3|2 14.27 cM	protein-coding	+1σ	15.3382	15.9601	15.7589	15.7403	15.1912	15.2586	16.3929	16.427	16.1652	16.5065
711	443	F8WJE0_TPPSTPPATANLSADDDFQNTDLR_1xDeamidated [N/Q]; 2xPhospho [T1(93.6); S4(93.6)]_1xDeamidated [N11; Q19; N20]; 2xPhospho [T1(93.6); S4(93.6); T5(12.6); T9(0.2); S13(0); T21(0)]	F8WJE0	Samhd1	5	5	16.4735	17.2025	16.838	0.0758657	0.603329	-1.65747	12Mo-KO_1Way down vs WT	-2.93565	1.06859	-0.728983	F8WJE0	TPPSTPPATANLSADDDFQNTDLR	1xDeamidated [N/Q]; 2xPhospho [T1(93.6); S4(93.6)]	1xDeamidated [N11; Q19; N20]; 2xPhospho [T1(93.6); S4(93.6); T5(12.6); T9(0.2); S13(0); T21(0)]	NP_061339	0.002826	0	Samhd1	SAM domain and HD domain, 1	56045	Samhd1	2|2 H1	protein-coding	-2σ	17.4853	17.1946	17.0995	16.7647	17.4684	17.2827	16.9987	15.9826	16.6339	15.4697
3169	444	Q99LG1_IQQQAGTVPHSQEEDSQEEEEDVSSR_1xDeamidated [Q]; 1xPhospho [S16(100)]_1xDeamidated [Q2; Q3; Q4; Q12; Q17]; 1xPhospho [T7(0); S11(0); S16(100); S24(0); S25(0)]	Q99LG1	Tmem51	5	5	17.9161	18.887	18.4016	0.0759469	0.51016	-1.96017	12Mo-KO_1Way down vs WT	-4.19834	1.09267	-0.970979	Q99LG1	IQQQAGTVPHSQEEDSQEEEEDVSSR	1xDeamidated [Q]; 1xPhospho [S16(100)]	1xDeamidated [Q2; Q3; Q4; Q12; Q17]; 1xPhospho [T7(0); S11(0); S16(100); S24(0); S25(0)]	NP_663377	0.0103062	0	Tmem51	transmembrane protein 51	214359	Tmem51	4|4 D3	protein-coding	-2σ	19.1585	18.5525	19.1681	18.751	18.805	18.8406	17.7574	18.4074	16.2058	18.369
2122	445	F6RR81_AEHLGLSGADSDEDPAK_1xPhospho [S11(88.7)]_1xPhospho [S7(11.4); S11(88.7)]	F6RR81	---	5	5	16.0993	15.8556	15.9774	0.0765463	1.184	1.184	12Mo-KO_1Way up vs WT	-1.02298	1.43408	0.243674	F6RR81	AEHLGLSGADSDEDPAK	1xPhospho [S11(88.7)]	1xPhospho [S7(11.4); S11(88.7)]	---	0.20838	0.00892038	Cobl	cordon-bleu WH2 repeat	12808	Cobl	11 A1|11 7.3 cM	protein-coding	+0.5σ	16.0472	15.7249	16.0262	15.7439	15.7358	15.8866	16.2148	15.8953	16.3767	16.1231
2142	446	Q9WVE8_TQTYPTDWSDDESNNPFSSTDANGDSNPFDEDTTSGTEVR_2xDeamidated [Q/N]; 1xPhospho [T3(76.6)]_2xDeamidated [Q2; N14; N15; N23; N27]; 1xPhospho [T1(17.7); T3(76.6); Y4(1.1); T6(4.3); S9(0.3); S13(0.1); S18(0); S19(0); T20(0); S26(0); T33(0); T34(0); S35(0); T37(ｪ'ﾖ$b*	Q9WVE8	Pacsin2	5	5	19.3298	18.012	18.6709	0.0765619	2.49284	2.49284	12Mo-KO_1Way up vs WT	-1.1308	7.02705	1.31779	Q9WVE8	TQTYPTDWSDDESNNPFSSTDANGDSNPFDEDTTSGTEVR	2xDeamidated [Q/N]; 1xPhospho [T3(76.6)]	2xDeamidated [Q2; N14; N15; N23; N27]; 1xPhospho [T1(17.7); T3(76.6); Y4(1.1); T6(4.3); S9(0.3); S13(0.1); S18(0); S19(0); T20(0); S26(0); T33(0); T34(0); S35(0); T37(ｪ'ﾖ$b*	NP_001152981	0.000721539	0	Pacsin2	protein kinase C and casein kinase substrate in neurons 2	23970	Pacsin2	15|15 E1	protein-coding	+3σ	18.6032	18.1966	15.4892	18.653	19.1179	19.2699	19.2778	19.4022	19.2675	19.4313
1445	447	P14873_TPEEGGYSYEISEK_1xPhospho [T1(100)]_1xPhospho [T1(100); Y7(0); S8(0); Y9(0); S12(0)]	P14873	Map1b	5	5	16.5775	16.0379	16.3077	0.076728	1.45357	1.45357	12Mo-KO_1Way up vs WT	-1.05193	2.22258	0.539598	P14873	TPEEGGYSYEISEK	1xPhospho [T1(100)]	1xPhospho [T1(100); Y7(0); S8(0); Y9(0); S12(0)]	NP_032660	0.0429374	0.000921163	Map1b	microtubule-associated protein 1B	17755	Map1b	13 D1|13 52.9 cM	protein-coding	+1σ	15.8791	16.0842	15.7096	16.6283	15.8886	16.5412	16.6973	15.8439	16.6377	17.1675
63	448	J3QNK8_TNPPTQKPPSPPVSGR_1xPhospho [S10(100)]_1xPhospho [T1(0); T5(0); S10(100); S14(0)]	J3QNK8	---	5	5	18.4398	18.1238	18.2818	0.0770319	1.24486	1.24486	12Mo-KO_1Way up vs WT	-1.03041	1.59681	0.315985	J3QNK8	TNPPTQKPPSPPVSGR	1xPhospho [S10(100)]	1xPhospho [T1(0); T5(0); S10(100); S14(0)]	---	0.121078	0.00324389	Abi1	abl interactor 1	11308	Abi1	2 A3|2 15.18 cM	protein-coding	+1σ	17.7469	17.9046	18.5168	18.4555	17.995	18.384	18.4704	18.4316	18.5249	18.388
3167	449	D3YWD3_GGPAEAPSPR_1xPhospho [S8(100)]_1xPhospho [S8(100)]	D3YWD3	Tmem245	5	5	17.4857	17.8836	17.6847	0.0772013	0.758961	-1.31759	12Mo-KO_1Way down vs WT	-1.80319	1.03867	-0.397903	D3YWD3	GGPAEAPSPR	1xPhospho [S8(100)]	1xPhospho [S8(100)]	NP_780727	0.0215432	0.000280731	Tmem245	transmembrane protein 245	242474	Tmem245	4|4 B3	protein-coding	-1σ	17.6717	17.4641	18.0652	18.3324	17.8845	17.7769	17.563	17.6156	17.0322	17.4408
296	450	Q6P542_SKPAAADSEGEEEEEDTAK_1xPhospho [S8(100)]_1xPhospho [S1(0); S8(100); T17(0)]	Q6P542	Abcf1	5	5	21.0726	20.5813	20.827	0.077665	1.4057	1.4057	12Mo-KO_1Way up vs WT	-1.04874	2.07229	0.491285	Q6P542	SKPAAADSEGEEEEEDTAK	1xPhospho [S8(100)]	1xPhospho [S1(0); S8(100); T17(0)]	NP_038882	2.53436e-05	0	Abcf1	ATP-binding cassette, sub-family F (GCN20), member 1	224742	Abcf1	17 B1|17 18.8 cM	protein-coding	+1σ	19.8393	21.1252	20.4156	20.4511	21.0755	21.057	21.2245	20.9293	21.089	21.0633
2735	451	E9QQ25_RLQESPSLSALSETQPPSPARPSVPK_1xPhospho [S18(99.6)]_1xPhospho [S5(0); S7(0); S9(0); S12(0); T14(0); S18(99.6); S23(0.4)]	E9QQ25	Speg	5	5	17.256	16.6429	16.9494	0.0778418	1.52946	1.52946	12Mo-KO_1Way up vs WT	-1.06155	2.48323	0.613022	E9QQ25	RLQESPSLSALSETQPPSPARPSVPK	1xPhospho [S18(99.6)]	1xPhospho [S5(0); S7(0); S9(0); S12(0); T14(0); S18(99.6); S23(0.4)]	NP_031489	0.0618286	0.00104129	Speg	SPEG complex locus	11790	Speg	1 C4|1 38.88 cM	protein-coding	+2σ	17.2083	16.824	16.37	16.1183	16.6941	18.0898	17.3768	17.1987	16.7119	16.9027
2042	452	A0A0U1RPA0_VMSPLQSPTK_2xPhospho [S3(100); T9(100)]_2xPhospho [S3(100); S7(0); T9(100)]	A0A0U1RPA0	---	5	5	17.4957	17.8257	17.6607	0.0779943	0.795531	-1.25702	12Mo-KO_1Way down vs WT	-1.632	1.03285	-0.330009	A0A0U1RPA0	VMSPLQSPTK	2xPhospho [S3(100); T9(100)]	2xPhospho [S3(100); S7(0); T9(100)]	---	0.0246125	0.000280731	Plekha7	pleckstrin homology domain containing, family A member 7	233765	Plekha7	7|7 F1	protein-coding	-1σ	18.0525	17.6984	18.1841	17.4149	17.7784	17.6894	17.3134	17.6036	17.6321	17.2398
541	453	Q63918_LEDQMQEDREEGSFTEGLSEASLPSGLMEGSAEDAEK_1xOxidation [M]; 1xPhospho [S13(95.9)]_1xOxidation [M5; M28]; 1xPhospho [S13(95.9); T15(4.1); S19(0.1); S22(0); S25(0); S31(0)]	Q63918	Cavin2	5	5	18.2137	19.0397	18.6267	0.078316	0.564091	-1.77276	12Mo-KO_1Way down vs WT	-3.41041	1.08519	-0.826	Q63918	LEDQMQEDREEGSFTEGLSEASLPSGLMEGSAEDAEK	1xOxidation [M]; 1xPhospho [S13(95.9)]	1xOxidation [M5; M28]; 1xPhospho [S13(95.9); T15(4.1); S19(0.1); S22(0); S25(0); S31(0)]	NP_620080	1.85148e-05	0	Cavin2	caveolae associated 2	20324	Cavin2	1|1 C1.1	protein-coding	-2σ	18.1801	19.1795	19.8133	19.1468	18.8789	18.1673	18.0369	17.2035	18.5634	19.0974
2357	454	Q5XJE5_KLNSDEEGESSGK_1xPhospho [S4(100)]_1xPhospho [S4(100); S10(0); S11(0)]	Q5XJE5	Leo1	5	5	16.8826	15.7799	16.3313	0.0784972	2.14747	2.14747	12Mo-KO_1Way up vs WT	-1.11603	5.14671	1.10264	Q5XJE5	KLNSDEEGESSGK	1xPhospho [S4(100)]	1xPhospho [S4(100); S10(0); S11(0)]	NP_001034611	0.000361997	0	Leo1	Leo1, Paf1/RNA polymerase II complex component	235497	Leo1	9|9 D	protein-coding	+2σ	14.3103	16.3518	16.8363	16.6726	14.7286	17.295	17.2184	16.6952	16.6185	16.5857
1769	455	A0A0G2JEX1_EMLASDDEEESSPK_1xPhospho [S5(100)]_1xPhospho [S5(100); S11(0); S12(0)]	A0A0G2JEX1	---	5	5	23.2024	22.8752	23.0388	0.0785555	1.25458	1.25458	12Mo-KO_1Way up vs WT	-1.03318	1.62619	0.327204	A0A0G2JEX1	EMLASDDEEESSPK	1xPhospho [S5(100)]	1xPhospho [S5(100); S11(0); S12(0)]	---	0.000566108	0	Nexn	nexilin	68810	Nexn	3|3 H3	protein-coding	+1σ	22.4498	23.1032	23.164	22.6029	23.0561	23.03	23.4175	23.1681	23.3132	23.0832
1699	456	A0A0R4IZX2_VIPTEEHVEGPLPSPVTNGTSPAQLNGGSVCSSR_1xCarbamidomethyl [C31]; 2xDeamidated [N26; Q/N]; 1xPhospho [S29(96.5)]_1xCarbamidomethyl [C31]; 2xDeamidated [N18; Q24; N26]; 1xPhospho [T4(0); S14(0); T17(0.1); T20(0); S21(0); S29(96.5); S32(1.7); S33(1.7)]	A0A0R4IZX2	Slc9a3r2	5	5	17.0331	17.7584	17.3957	0.078559	0.604881	-1.65322	12Mo-KO_1Way down vs WT	-2.93821	1.07503	-0.725277	A0A0R4IZX2	VIPTEEHVEGPLPSPVTNGTSPAQLNGGSVCSSR	1xCarbamidomethyl [C31]; 2xDeamidated [N26; Q/N]; 1xPhospho [S29(96.5)]	1xCarbamidomethyl [C31]; 2xDeamidated [N18; Q24; N26]; 1xPhospho [T4(0); S14(0); T17(0.1); T20(0); S21(0); S29(96.5); S32(1.7); S33(1.7)]	NP_075542	0.0216459	0.000280731	Slc9a3r2	solute carrier family 9 (sodium/hydrogen exchanger), member 3 regulator 2	65962	Slc9a3r2	17|17 A3.3	protein-coding	-2σ	18.1999	17.8465	17.815	16.9014	18.0291	16.534	17.6782	17.1504	17.5579	16.2452
1361	457	Q9JKS4_ASPGALEFGDTFSSSFSQTSVCSPLMEASGPVLPLGSPVAK_1xCarbamidomethyl [C22]; 1xDeamidated [Q18]; 1xOxidation [M26]; 1xPhospho [S2(98.8)]_1xCarbamidomethyl [C22]; 1xDeamidated [Q18]; 1xOxidation [M26]; 1xPhospho [S2(98.8); T11(0.2); S13(0.1); S14(0.1); S15(0.8ｪ'ﾖ$b*	Q9JKS4	Ldb3	5	5	15.8773	14.8686	15.3729	0.0792437	2.01209	2.01209	12Mo-KO_1Way up vs WT	-1.10833	4.48708	1.0087	Q9JKS4	ASPGALEFGDTFSSSFSQTSVCSPLMEASGPVLPLGSPVAK	1xCarbamidomethyl [C22]; 1xDeamidated [Q18]; 1xOxidation [M26]; 1xPhospho [S2(98.8)]	1xCarbamidomethyl [C22]; 1xDeamidated [Q18]; 1xOxidation [M26]; 1xPhospho [S2(98.8); T11(0.2); S13(0.1); S14(0.1); S15(0.8ｪ'ﾖ$b*	NP_001034160	0.00029224	0	Ldb3	LIM domain binding 3	24131	Ldb3	14|14 B	protein-coding	+2σ	15.0588	14.7981	13.6803	16.3863	14.4194	15.0215	16.1701	15.9529	15.8615	16.3803
3157	458	Q91V04_KGTENGVNGTVTSNGADSPR_2xDeamidated [N]; 1xPhospho [S18(100)]_2xDeamidated [N5; N8; N14]; 1xPhospho [T3(0); T10(0); T12(0); S13(0); S18(100)]	Q91V04	Tram1	5	5	16.0456	15.6507	15.8482	0.0793189	1.31485	1.31485	12Mo-KO_1Way up vs WT	-1.04119	1.80004	0.3949	Q91V04	KGTENGVNGTVTSNGADSPR	2xDeamidated [N]; 1xPhospho [S18(100)]	2xDeamidated [N5; N8; N14]; 1xPhospho [T3(0); T10(0); T12(0); S13(0); S18(100)]	NP_082449	0.00122925	0	Tram1	translocating chain-associating membrane protein 1	72265	Tram1	1|1 A3	protein-coding	+1σ	15.7334	15.4571	16.1698	15.4795	15.4135	16.0556	16.0983	16.3239	15.5327	16.2174
40	459	P62908_DEILPTTPISEQK_1xPhospho [T7(99.7)]_1xPhospho [T6(0.3); T7(99.7); S10(0)]	P62908	Rps3	5	5	20.1124	20.3788	20.2456	0.0793718	0.831424	-1.20276	12Mo-KO_1Way down vs WT	-1.48661	1.02764	-0.266343	P62908	DEILPTTPISEQK	1xPhospho [T7(99.7)]	1xPhospho [T6(0.3); T7(99.7); S10(0)]	NP_036182	0.0178104	0	Rps3	ribosomal protein S3	27050	Rps3	7 E1|7 54.07 cM	protein-coding	-0.5σ	20.6566	20.2748	20.7089	20.1767	20.077	20.1114	20.1114	20.1027	20.2241	20.0127
1322	460	Q3UH68_SPEPEATLTFPFLDK_1xPhospho [S1(100)]_1xPhospho [S1(100); T7(0); T9(0)]	Q3UH68	Limch1	5	5	20.1043	20.5311	20.3177	0.0799756	0.743915	-1.34424	12Mo-KO_1Way down vs WT	-1.88925	1.04553	-0.42679	Q3UH68	SPEPEATLTFPFLDK	1xPhospho [S1(100)]	1xPhospho [S1(100); T7(0); T9(0)]	NP_001001980	7.9375e-05	0	Limch1	LIM and calponin homology domains 1	77569	Limch1	5|5 C3.1	protein-coding	-1σ	21.0272	20.7089	20.5271	20.0573	20.3349	20.4647	19.9215	19.8698	19.8624	20.4031
1589	461	Q3UIZ8_DETVGTTDLQQGIDPGAVSPEPGKDHAAQGPGR_1xDeamidated [Q]; 1xPhospho [S19(100)]_1xDeamidated [Q10; Q11; Q29]; 1xPhospho [T3(0); T6(0); T7(0); S19(100)]	Q3UIZ8	Mylk3	5	5	18.2522	20.9156	19.5839	0.0800838	0.157848	-6.33521	12Mo-KO_1Way down vs WT	-53.0382	1.3215	-2.66339	Q3UIZ8	DETVGTTDLQQGIDPGAVSPEPGKDHAAQGPGR	1xDeamidated [Q]; 1xPhospho [S19(100)]	1xDeamidated [Q10; Q11; Q29]; 1xPhospho [T3(0); T6(0); T7(0); S19(100)]	NP_001284541	0.00110711	0	Mylk3	myosin light chain kinase 3	213435	Mylk3	8|8 C3	protein-coding	-6σ	20.7645	20.8544	21.1788	21.0607	20.7198	19.4264	15.2797	20.4537	14.8846	21.2167
1868	462	A2AAJ9_EQEGTESDEGQLPQVLEELKDLQVAPGTR_1xDeamidated [Q]; 1xPhospho [T5(99.6)]_1xDeamidated [Q2; Q14; Q23]; 1xPhospho [T5(99.6); S7(0.5); T28(0)]	A2AAJ9	---	5	5	16.0413	15.6137	15.8275	0.0804921	1.345	1.345	12Mo-KO_1Way up vs WT	-1.04636	1.8929	0.42761	A2AAJ9	EQEGTESDEGQLPQVLEELKDLQVAPGTR	1xDeamidated [Q]; 1xPhospho [T5(99.6)]	1xDeamidated [Q2; Q14; Q23]; 1xPhospho [T5(99.6); S7(0.5); T28(0)]	---	0.0152956	0	Obscn	obscurin, cytoskeletal calmodulin and titin-interacting RhoGEF	380698	Obscn	11|11 B1.3	protein-coding	+1σ	15.4849	15.327	15.8253	15.6151	15.8164	15.8896	15.6379	15.7321	16.6663	16.2808
792	463	A2AFQ0_GSGTASDDEFENLR_1xPhospho [S6(100)]_1xPhospho [S2(0); T4(0); S6(100)]	A2AFQ0	Huwe1	5	5	19.5996	19.3817	19.4906	0.0809651	1.16302	1.16302	12Mo-KO_1Way up vs WT	-1.0237	1.38467	0.21788	A2AFQ0	GSGTASDDEFENLR	1xPhospho [S6(100)]	1xPhospho [S2(0); T4(0); S6(100)]	NP_067498	0.000749527	0	Huwe1	HECT, UBA and WWE domain containing 1	59026	Huwe1	X|X F3	protein-coding	+0.5σ	19.0427	19.3995	19.4417	19.4341	19.5905	19.6279	19.7889	19.5857	19.5857	19.4099
1083	464	P07901_ESDDKPEIEDVGSDEEEEEK_1xPhospho [S13(100)]_1xPhospho [S2(0); S13(100)]	P07901	Hsp90aa1	5	5	20.9497	20.5231	20.7364	0.0820032	1.34407	1.34407	12Mo-KO_1Way up vs WT	-1.0484	1.89396	0.426606	P07901	ESDDKPEIEDVGSDEEEEEK	1xPhospho [S13(100)]	1xPhospho [S2(0); S13(100)]	NP_034610	8.60605e-05	0	Hsp90aa1	heat shock protein 90, alpha (cytosolic), class A member 1	15519	Hsp90aa1	12 F1|12 60.75 cM	protein-coding	+1σ	20.2045	20.6933	21.0996	19.9375	20.6803	20.8574	21.0212	20.7546	20.9697	21.1454
3241	465	Q922Y1_SSPPATDPGPVPSSPSQEPPTK_1xPhospho [S/T]_1xPhospho [S1(50); S2(50); T6(0); S13(0); S14(0); S16(0); T21(0)]	Q922Y1	Ubxn1	5	5	19.3131	19.6858	19.4994	0.0834844	0.772353	-1.29475	12Mo-KO_1Way down vs WT	-1.7501	1.04399	-0.372668	Q922Y1	SSPPATDPGPVPSSPSQEPPTK	1xPhospho [S/T]	1xPhospho [S1(50); S2(50); T6(0); S13(0); S14(0); S16(0); T21(0)]	NP_666205	0.00274648	0	Ubxn1	UBX domain protein 1	225896	Ubxn1	19|19 A	protein-coding	-1σ	20.0617	19.5194	19.8178	19.5379	19.492	19.692	19.4806	18.9345	18.9684	19.4899
1987	466	A0A0N4SWG4_RSSLNSINSSDAK_1xPhospho [S3(87.9)]_1xPhospho [S2(11.8); S3(87.9); S6(0.3); S9(0); S10(0)]	A0A0N4SWG4	---	5	5	18.6766	17.6449	18.1608	0.0845005	2.04437	2.04437	12Mo-KO_1Way up vs WT	-1.13029	4.72401	1.03166	A0A0N4SWG4	RSSLNSINSSDAK	1xPhospho [S3(87.9)]	1xPhospho [S2(11.8); S3(87.9); S6(0.3); S9(0); S10(0)]	---	0.0061364	0	Pde1c	phosphodiesterase 1C	18575	Pde1c	6 B3|6 27.65 cM	protein-coding	+2σ	17.3861	17.9334	15.7818	18.5907	18.5326	18.7051	18.6432	18.596	18.4229	19.0158
1582	467	Q3UIZ8_IPINMQEMATPGELLETQSGSPIGSAEAPGLGTVLEDQIPK_1xDeamidated [Q/N]; 1xPhospho [S/T]_1xDeamidated [N4; Q6; Q18; Q38]; 1xPhospho [T10(15.1); T17(15.1); S19(4.9); S21(1.6); S25(48.3); T33(15.1)]	Q3UIZ8	Mylk3	5	5	18.4837	20.441	19.4624	0.0850624	0.257511	-3.88333	12Mo-KO_1Way down vs WT	-19.091	1.26596	-1.95729	Q3UIZ8	IPINMQEMATPGELLETQSGSPIGSAEAPGLGTVLEDQIPK	1xDeamidated [Q/N]; 1xPhospho [S/T]	1xDeamidated [N4; Q6; Q18; Q38]; 1xPhospho [T10(15.1); T17(15.1); S19(4.9); S21(1.6); S25(48.3); T33(15.1)]	NP_001284541	3.60367e-05	0	Mylk3	myosin light chain kinase 3	213435	Mylk3	8|8 C3	protein-coding	-6σ	20.6749	20.3994	20.148	20.6566	20.3259	18.9594	19.1832	20.0204	14.5883	19.667
549	468	Q63918_SLEETLHNVDLSSDDELPRDEEALEDSAEEKMEESR_2xPhospho [S27(99.9); S/T]_2xPhospho [S1(0); T5(0); S12(50); S13(50); S27(99.9); S35(0)]	Q63918	Cavin2	5	5	19.3405	18.5533	18.9469	0.0850794	1.72572	1.72572	12Mo-KO_1Way up vs WT	-1.09954	3.27453	0.787194	Q63918	SLEETLHNVDLSSDDELPRDEEALEDSAEEKMEESR	2xPhospho [S27(99.9); S/T]	2xPhospho [S1(0); T5(0); S12(50); S13(50); S27(99.9); S35(0)]	NP_620080	0.00479167	0	Cavin2	caveolae associated 2	20324	Cavin2	1|1 C1.1	protein-coding	+2σ	18.9977	18.1004	17.5118	18.6258	19.5307	18.9841	19.1621	18.9477	19.9058	19.7026
1537	469	Q63943_ASPGLLPVANGNSLNK_1xDeamidated [N]; 1xPhospho [S2(100)]_1xDeamidated [N10; N12; N15]; 1xPhospho [S2(100); S13(0)]	Q63943	Mef2d	5	5	14.9395	15.8657	15.4026	0.0851162	0.526225	-1.90033	12Mo-KO_1Way down vs WT	-4.03826	1.11824	-0.926248	Q63943	ASPGLLPVANGNSLNK	1xDeamidated [N]; 1xPhospho [S2(100)]	1xDeamidated [N10; N12; N15]; 1xPhospho [S2(100); S13(0)]	NP_001297516	0.0842203	0.00198899	Mef2d	myocyte enhancer factor 2D	17261	Mef2d	3 F1|3 38.78 cM	protein-coding	-2σ	16.5069	14.4956	16.4961	15.5494	16.2807	15.8773	14.8366	14.4433	14.3853	15.1549
138	470	E9PYB0_DMSPTSTDTEVHR_1xPhospho [S3(100)]_1xPhospho [S3(100); T5(0); S6(0); T7(0); T9(0)]	E9PYB0	---	5	5	19.2452	18.9425	19.0938	0.085463	1.23342	1.23342	12Mo-KO_1Way up vs WT	-1.03754	1.57843	0.302666	E9PYB0	DMSPTSTDTEVHR	1xPhospho [S3(100)]	1xPhospho [S3(100); T5(0); S6(0); T7(0); T9(0)]	---	0.00463474	0	Ahnak2	AHNAK nucleoprotein 2	100041194	Ahnak2	12|12 F1	protein-coding	+1σ	18.9579	18.9498	18.5074	19.0209	19.2766	19.044	19.5808	19.1199	19.2436	19.2375
3318	471	Q6PGL7_ARPAQAPVSEELPPSPKPGK_1xPhospho [S15(100)]_1xPhospho [S9(0); S15(100)]	Q6PGL7	Washc2	5	5	15.8976	15.4021	15.6499	0.0856172	1.40983	1.40983	12Mo-KO_1Way up vs WT	-1.06244	2.11174	0.495524	Q6PGL7	ARPAQAPVSEELPPSPKPGK	1xPhospho [S15(100)]	1xPhospho [S9(0); S15(100)]	NP_080861	0.152902	0.00455194	Washc2	WASH complex subunit 2`	28006	Washc2	6 E3|6 53.76 cM	protein-coding	+1σ	15.7133	15.4849	15.1912	15.5339	15.0871	16.0477	16.3715	15.1197	15.7015	16.2475
2304	472	Q99P72_LPEDDEPPARPPAPAGASPLAEPAAPPSTPAAPK_1xPhospho [S/T]_1xPhospho [S18(54.5); S28(22.8); T29(22.8)]	Q99P72	Rtn4	5	5	16.3467	17.1204	16.7336	0.0858508	0.584926	-1.70962	12Mo-KO_1Way down vs WT	-3.21452	1.09981	-0.773674	Q99P72	LPEDDEPPARPPAPAGASPLAEPAAPPSTPAAPK	1xPhospho [S/T]	1xPhospho [S18(54.5); S28(22.8); T29(22.8)]	NP_077188	0.215616	0.00943619	Rtn4	reticulon 4	68585	Rtn4	11|11 A3.3	protein-coding	-2σ	17.3297	16.5588	17.2431	17.4772	16.9931	16.953	14.9588	16.4107	16.5512	16.8598
3159	473	Q8BU14_EDSKKEETPGTPK_1xPhospho [T11(99.2)]_1xPhospho [S3(0); T8(0.8); T11(99.2)]	Q8BU14	Sec62	5	5	16.2534	14.6734	15.4634	0.0858736	2.98974	2.98974	12Mo-KO_1Way up vs WT	-1.21459	10.8567	1.58002	Q8BU14	EDSKKEETPGTPK	1xPhospho [T11(99.2)]	1xPhospho [S3(0); T8(0.8); T11(99.2)]	NP_081292	0.00539678	0	Sec62	SEC62 homolog (S. cerevisiae)	69276	Sec62	3|3 A3	protein-coding	+3σ	15.7534	11.9236	15.6396	14.4956	15.5547	15.68	16.5553	15.1756	17.0963	16.7599
2452	474	Q52KI8_AASPSPQSVR_1xPhospho [S3(89.5)]_1xPhospho [S3(89.5); S5(10.5); S8(0)]	Q52KI8	Srrm1	5	5	17.9942	18.272	18.1331	0.0859017	0.824853	-1.21234	12Mo-KO_1Way down vs WT	-1.5209	1.0348	-0.277791	Q52KI8	AASPSPQSVR	1xPhospho [S3(89.5)]	1xPhospho [S3(89.5); S5(10.5); S8(0)]	NP_058079	0.0557299	0.00104129	Srrm1	serine/arginine repetitive matrix 1	51796	Srrm1	4|4 D3	protein-coding	-1σ	18.403	17.9169	18.3303	18.4542	18.2557	18.0744	18.3451	17.9874	17.744	17.8204
986	475	P23242_KVAAGHELQPLAIVDQRPSSR_1xPhospho [S20(98.6)]_1xPhospho [S19(1.4); S20(98.6)]	P23242	Gja1	5	5	17.0226	18.0757	17.5492	0.0860493	0.48195	-2.0749	12Mo-KO_1Way down vs WT	-4.90363	1.139	-1.05304	P23242	KVAAGHELQPLAIVDQRPSSR	1xPhospho [S20(98.6)]	1xPhospho [S19(1.4); S20(98.6)]	NP_034418	0.049744	0.000921163	Gja1	gap junction protein, alpha 1	14609	Gja1	10 B4|10 28.64 cM	protein-coding	-2σ	18.3775	18.1783	17.6262	18.2155	17.9808	18.3029	15.7751	18.1959	16.7015	16.1377
1698	476	P26645_AEDGAAPSPSSETPKK_1xPhospho [S11(84.1)]_1xPhospho [S8(0); S10(7.9); S11(84.1); T13(7.9)]	P26645	Marcks	5	5	15.9203	15.2642	15.5922	0.0861439	1.57576	1.57576	12Mo-KO_1Way up vs WT	-1.08467	2.69327	0.656051	P26645	AEDGAAPSPSSETPKK	1xPhospho [S11(84.1)]	1xPhospho [S8(0); S10(7.9); S11(84.1); T13(7.9)]	NP_032564	0.078905	0.00161377	Marcks	myristoylated alanine rich protein kinase C substrate	17118	Marcks	10 B1|10 19.49 cM	protein-coding	+2σ	15.1768	15.3097	14.3519	15.3922	16.0905	16.272	15.7049	15.2892	16.2603	16.0749
1723	477	P70670_VQGEAVSNIQENTQTPTVQEESEEEEVDETGVEVK_2xDeamidated [N/Q]; 1xPhospho [T/S]_2xDeamidated [Q2; N8; Q10; N12; Q14; Q19]; 1xPhospho [S7(0.7); T13(44.4); T15(10.5); T17(44.4); S22(0.1); T30(0)]	P70670	Naca	5	5	20.3499	18.3012	19.3255	0.0862957	4.13729	4.13729	12Mo-KO_1Way up vs WT	-1.29018	22.0842	2.04868	P70670	VQGEAVSNIQENTQTPTVQEESEEEEVDETGVEVK	2xDeamidated [N/Q]; 1xPhospho [T/S]	2xDeamidated [Q2; N8; Q10; N12; Q14; Q19]; 1xPhospho [S7(0.7); T13(44.4); T15(10.5); T17(44.4); S22(0.1); T30(0)]	NP_001106670	0.00053216	0	Naca	nascent polypeptide-associated complex alpha polypeptide	17938	Naca	10|10 D3	protein-coding	+6σ	18.9647	16.8376	20.4549	15.1561	20.0929	20.1471	19.4642	20.7426	21.1529	20.2429
2571	478	A0A0B4J1E2_GPPSPPAPVMHSPSR_2xPhospho [S4(100); S12(99.4)]_2xPhospho [S4(100); S12(99.4); S14(0.7)]	A0A0B4J1E2	Snw1	5	5	19.8286	20.0208	19.9247	0.0865473	0.875255	-1.14252	12Mo-KO_1Way down vs WT	-1.33715	1.02435	-0.192225	A0A0B4J1E2	GPPSPPAPVMHSPSR	2xPhospho [S4(100); S12(99.4)]	2xPhospho [S4(100); S12(99.4); S14(0.7)]	NP_079783	0.000527121	0	Snw1	SNW domain containing 1	66354	Snw1	12|12 D2	protein-coding	-0.5σ	20.1218	20.1121	20.077	19.7044	20.089	19.8031	19.6195	19.8624	19.9568	19.9013
639	479	Q3UMF0_STSVDDTDKSSSEAIMVR_1xPhospho [S3(89.7)]_1xPhospho [S1(1); T2(9.3); S3(89.7); T7(0); S10(0); S11(0); S12(0)]	Q3UMF0	Cobll1	5	5	18.1284	17.2262	17.6773	0.0867283	1.86894	1.86894	12Mo-KO_1Way up vs WT	-1.12011	3.91245	0.902217	Q3UMF0	STSVDDTDKSSSEAIMVR	1xPhospho [S3(89.7)]	1xPhospho [S1(1); T2(9.3); S3(89.7); T7(0); S10(0); S11(0); S12(0)]	NP_081501	0.000848204	0	Cobll1	Cobl-like 1	319876	Cobll1	2|2 C1.3	protein-coding	+2σ	16.0347	17.1431	17.2063	17.6317	18.1149	17.1945	18.5634	17.5889	18.6475	18.6475
3037	480	A2ASS6_IELSPSMEAPK_1xPhospho [S6(100)]_1xPhospho [S4(0); S6(100)]	A2ASS6	---	5	5	25.1315	24.8937	25.0126	0.0872107	1.17916	1.17916	12Mo-KO_1Way up vs WT	-1.03071	1.43313	0.237764	A2ASS6	IELSPSMEAPK	1xPhospho [S6(100)]	1xPhospho [S4(0); S6(100)]	---	0.00250914	0	Ttn	titin	22138	Ttn	2 C3|2 45.13 cM	protein-coding	+0.5σ	25.0626	24.55	24.7495	25.227	24.8796	25.1488	25.0651	25.0651	25.2297	25.1488
438	481	Q3UZA1_VELGQNGEEKSPSGASHPPK_1xDeamidated [N/Q]; 1xPhospho [S13(87.5)]_1xDeamidated [Q5; N6]; 1xPhospho [S11(1.5); S13(87.5); S16(11)]	Q3UZA1	Rcsd1	5	5	19.0703	18.3382	18.7042	0.087754	1.661	1.661	12Mo-KO_1Way up vs WT	-1.09898	3.032	0.732054	Q3UZA1	VELGQNGEEKSPSGASHPPK	1xDeamidated [N/Q]; 1xPhospho [S13(87.5)]	1xDeamidated [Q5; N6]; 1xPhospho [S11(1.5); S13(87.5); S16(11)]	NP_001033935	0.0150073	0	Rcsd1	RCSD domain containing 1	226594	Rcsd1	1|1 H2.3	protein-coding	+2σ	18.3642	18.1054	17.5417	18.0686	19.6112	19.1671	18.9782	18.6531	18.9802	19.5728
629	482	E9Q8Q6_AQESALPSPIAFADGGHSK_1xDeamidated [Q2]; 1xPhospho [S8(100)]_1xDeamidated [Q2]; 1xPhospho [S4(0); S8(100); S18(0)]	E9Q8Q6	Ccdc141	5	5	17.1842	17.6005	17.3924	0.0879325	0.749367	-1.33446	12Mo-KO_1Way down vs WT	-1.87939	1.05538	-0.416255	E9Q8Q6	AQESALPSPIAFADGGHSK	1xDeamidated [Q2]; 1xPhospho [S8(100)]	1xDeamidated [Q2]; 1xPhospho [S4(0); S8(100); S18(0)]	NP_001020747	0.00273345	0	Ccdc141	coiled-coil domain containing 141	545428	Ccdc141	2|2 C3	protein-coding	-1σ	18.2142	16.942	17.717	17.4784	17.6508	17.2872	16.9587	17.265	17.2671	17.1431
3059	483	A2ASS6_SLSPTYIELMRPVSELIR_2xPhospho [S1(100); S3(100)]_2xPhospho [S1(100); S3(100); T5(0); Y6(0); S14(0)]	A2ASS6	---	5	5	20.0175	19.1744	19.5959	0.0880443	1.79393	1.79393	12Mo-KO_1Way up vs WT	-1.11568	3.59046	0.843123	A2ASS6	SLSPTYIELMRPVSELIR	2xPhospho [S1(100); S3(100)]	2xPhospho [S1(100); S3(100); T5(0); Y6(0); S14(0)]	---	0.0156637	0	Ttn	titin	22138	Ttn	2 C3|2 45.13 cM	protein-coding	+2σ	17.7871	19.4993	19.0084	19.8393	19.7378	19.3565	19.796	19.9917	20.6338	20.3095
2092	484	A0A087WR45_SPDVDTPEQPR_1xPhospho [S1(100)]_1xPhospho [S1(100); T6(0)]	A0A087WR45	Prob1	5	5	21.0064	21.2812	21.1438	0.0883744	0.826531	-1.20988	12Mo-KO_1Way down vs WT	-1.51741	1.03662	-0.274859	A0A087WR45	SPDVDTPEQPR	1xPhospho [S1(100)]	1xPhospho [S1(100); T6(0)]	NP_001257575	0.00646604	0	Prob1	proline rich basic protein 1	381148	Prob1	18|18 B2	protein-coding	-0.5σ	21.5207	21.2099	21.354	20.9148	21.407	21.0633	21.2658	20.7304	20.8516	21.1208
3187	485	P58771_AISEELDHALNDMTSI_1xDeamidated [N11]; 1xOxidation [M13]; 1xPhospho [S15(91.4)]_1xDeamidated [N11]; 1xOxidation [M13]; 1xPhospho [S3(0); T14(8.7); S15(91.4)]	P58771	Tpm1	5	5	21.544	21.8955	21.7198	0.0886464	0.783757	-1.27591	12Mo-KO_1Way down vs WT	-1.70507	1.04739	-0.351521	P58771	AISEELDHALNDMTSI	1xDeamidated [N11]; 1xOxidation [M13]; 1xPhospho [S15(91.4)]	1xDeamidated [N11]; 1xOxidation [M13]; 1xPhospho [S3(0); T14(8.7); S15(91.4)]	NP_001157720	0.0011446	0	Tpm1	tropomyosin 1, alpha	22003	Tpm1	9 C|9 36.27 cM	protein-coding	-1σ	22.157	22.0242	22.2986	21.4988	21.4988	21.4422	21.5105	21.7482	21.6513	21.3675
590	486	Q9CWK3_HSLDSDEEDDDEEGSSK_1xPhospho [S5(100)]_1xPhospho [S2(0); S5(100); S15(0); S16(0)]	Q9CWK3	Cd2bp2	5	5	17.9721	17.2703	17.6212	0.0888119	1.6265	1.6265	12Mo-KO_1Way up vs WT	-1.09723	2.90271	0.701769	Q9CWK3	HSLDSDEEDDDEEGSSK	1xPhospho [S5(100)]	1xPhospho [S2(0); S5(100); S15(0); S16(0)]	NP_001272834	1.94168e-05	0	Cd2bp2	CD2 cytoplasmic tail binding protein 2	70233	Cd2bp2	7|7 F3	protein-coding	+2σ	16.1372	18.0409	17.388	16.8286	17.9569	17.8125	17.9229	18.0318	18.1599	17.9333
3281	487	Q8VEJ9_GSDSDSEGDNPEK_1xPhospho [S4(99.4)]_1xPhospho [S2(0); S4(99.4); S6(0.7)]	Q8VEJ9	Vps4a	5	5	12.0222	13.3342	12.6782	0.0888488	0.402767	-2.48282	12Mo-KO_1Way down vs WT	-7.3332	1.1896	-1.31198	Q8VEJ9	GSDSDSEGDNPEK	1xPhospho [S4(99.4)]	1xPhospho [S2(0); S4(99.4); S6(0.7)]	NP_569053	0.0208377	0.000280731	Vps4a	vacuolar protein sorting 4A	116733	Vps4a	8|8 D3	protein-coding	-3σ	13.7552	13.7133	11.9236	13.7889	13.4899	11.446	11.446	14.327	11.446	11.446
2033	488	Q9CY58_SKSEEAHAEDSVMDHHFR_1xPhospho [S3(88.9)]_1xPhospho [S1(11.1); S3(88.9); S11(0)]	Q9CY58	Serbp1	5	5	17.3139	17.891	17.6025	0.0888623	0.670328	-1.49181	12Mo-KO_1Way down vs WT	-2.40216	1.07938	-0.577062	Q9CY58	SKSEEAHAEDSVMDHHFR	1xPhospho [S3(88.9)]	1xPhospho [S1(11.1); S3(88.9); S11(0)]	NP_001107037	0.000628563	0	Serbp1	serpine1 mRNA binding protein 1	66870	Serbp1	6|6 C1	protein-coding	-2σ	18.0044	16.9931	18.5972	17.5475	18.3128	17.5907	17.3669	17.1518	17.3768	17.0834
545	489	Q63918_SLEETLHNVDLSSDDELPRDEEALEDSAEEK_2xPhospho [S12(100); S13(100)]_2xPhospho [S1(0); T5(0); S12(100); S13(100); S27(0)]	Q63918	Cavin2	5	5	20.6905	19.921	20.3057	0.0889974	1.70463	1.70463	12Mo-KO_1Way up vs WT	-1.10758	3.21839	0.769461	Q63918	SLEETLHNVDLSSDDELPRDEEALEDSAEEK	2xPhospho [S12(100); S13(100)]	2xPhospho [S1(0); T5(0); S12(100); S13(100); S27(0)]	NP_620080	0.000337067	0	Cavin2	caveolae associated 2	20324	Cavin2	1|1 C1.1	protein-coding	+2σ	19.7957	20.7865	19.9292	18.6641	20.4297	20.6096	20.7023	21.0957	20.9293	20.1156
2073	490	Q569Z5_AALGLQDSDDEDAAVDIDEQIESMFNSK_1xPhospho [S8(100)]_1xPhospho [S8(100); S23(0); S27(0)]	Q569Z5	Ddx46	5	5	17.5651	17.0591	17.3121	0.0892951	1.42008	1.42008	12Mo-KO_1Way up vs WT	-1.07	2.15778	0.505968	Q569Z5	AALGLQDSDDEDAAVDIDEQIESMFNSK	1xPhospho [S8(100)]	1xPhospho [S8(100); S23(0); S27(0)]	NP_001268984	8.68832e-05	0	Ddx46	DEAD box helicase 46	212880	Ddx46	13|13 B1	protein-coding	+1σ	16.1227	17.1762	17.402	17.2829	17.3117	17.2542	17.4033	17.5536	17.8703	17.744
839	491	O70251_YGPSSVEDTTGSGAADAKDDDDIDLFGSDDEEESEEAKK_1xPhospho [S28(100)]_1xPhospho [Y1(0); S4(0); S5(0); T9(0); T10(0); S12(0); S28(100); S34(0)]	O70251	Eef1b2	5	5	21.6746	21.004	21.3393	0.0899088	1.59176	1.59176	12Mo-KO_1Way up vs WT	-1.09522	2.77497	0.670627	O70251	YGPSSVEDTTGSGAADAKDDDDIDLFGSDDEEESEEAKK	1xPhospho [S28(100)]	1xPhospho [Y1(0); S4(0); S5(0); T9(0); T10(0); S12(0); S28(100); S34(0)]	NP_061266	0.00173135	0	Eef1b2	eukaryotic translation elongation factor 1 beta 2	55949	Eef1b2	1|1 C2	protein-coding	+2σ	20.7572	21.5891	21.5634	19.8663	21.2439	21.6616	21.2319	21.6398	22.0472	21.7926
2869	492	E9Q1U2_MQSSVSESSFQMGR_1xPhospho [S6(100)]_1xPhospho [S3(0); S4(0); S6(100); S8(0); S9(0)]	E9Q1U2	Synpo2	5	5	19.7077	19.8762	19.7919	0.0902347	0.889767	-1.12389	12Mo-KO_1Way down vs WT	-1.29255	1.02329	-0.168501	E9Q1U2	MQSSVSESSFQMGR	1xPhospho [S6(100)]	1xPhospho [S3(0); S4(0); S6(100); S8(0); S9(0)]	NP_536699	0.00211423	0	Synpo2	synaptopodin 2	118449	Synpo2	3|3 G1	protein-coding	-0.5σ	19.9531	19.8358	19.8422	20.0727	19.6774	19.8698	19.7845	19.6989	19.6538	19.5316
805	493	P97868_VEGTEIVKPSPK_1xPhospho [S10(100)]_1xPhospho [T4(0); S10(100)]	P97868	Rbbp6	5	5	15.6431	15.2083	15.4257	0.0902986	1.35175	1.35175	12Mo-KO_1Way up vs WT	-1.0613	1.93924	0.434828	P97868	VEGTEIVKPSPK	1xPhospho [S10(100)]	1xPhospho [T4(0); S10(100)]	NP_035377	0.0861994	0.00215274	Rbbp6	retinoblastoma binding protein 6, ubiquitin ligase	19647	Rbbp6	7|7 F2	protein-coding	+1σ	15.4757	14.7286	15.5547	15.4757	14.8068	15.7081	15.3943	15.3187	15.7175	16.0771
1799	494	Q02780_SPGSGSQSSGWHEVEPGLPSPSTLK_1xPhospho [S1(100)]_1xPhospho [S1(100); S4(0); S6(0); S8(0); S9(0); S20(0); S22(0); T23(0)]	Q02780	Nfia	5	5	19.5335	19.8362	19.6849	0.0905587	0.810767	-1.2334	12Mo-KO_1Way down vs WT	-1.58598	1.04253	-0.30264	Q02780	SPGSGSQSSGWHEVEPGLPSPSTLK	1xPhospho [S1(100)]	1xPhospho [S1(100); S4(0); S6(0); S8(0); S9(0); S20(0); S22(0); T23(0)]	NP_001116424	0.00812459	0	Nfia	nuclear factor I/A	18027	Nfia	4 C5- C6|4 45.52 cM	protein-coding	-1σ	19.9949	19.7999	19.9987	19.9408	19.4464	19.1283	19.4931	19.7069	19.5178	19.8215
1807	495	P97863_TISIDENMEPSPTGDFYPSPNSPAAGSR_1xDeamidated [N]; 1xPhospho [S22(84.4)]_1xDeamidated [N7; N21]; 1xPhospho [T1(0); S3(0); S11(0); T13(0); Y17(0); S19(0); S22(84.4); S27(15.6)]	P97863	Nfib	5	5	18.1451	18.5742	18.3596	0.0909187	0.742764	-1.34632	12Mo-KO_1Way down vs WT	-1.92376	1.06133	-0.429024	P97863	TISIDENMEPSPTGDFYPSPNSPAAGSR	1xDeamidated [N]; 1xPhospho [S22(84.4)]	1xDeamidated [N7; N21]; 1xPhospho [T1(0); S3(0); S11(0); T13(0); Y17(0); S19(0); S22(84.4); S27(15.6)]	NP_001106680	0.00233634	0	Nfib	nuclear factor I/B	18028	Nfib	4 C3|4 38.4 cM	protein-coding	-1σ	18.9627	18.7355	18.4333	18.3984	18.3408	18.0649	18.3991	18.7149	17.6268	17.9199
1178	496	P10922_TENSTSAPAAKPK_1xDeamidated [N3]; 1xPhospho [S4(86.9)]_1xDeamidated [N3]; 1xPhospho [T1(0); S4(86.9); T5(6.5); S6(6.5)]	P10922	H1f0	5	5	16.1678	16.92	16.5439	0.0909843	0.59369	-1.68438	12Mo-KO_1Way down vs WT	-3.14973	1.11018	-0.752219	P10922	TENSTSAPAAKPK	1xDeamidated [N3]; 1xPhospho [S4(86.9)]	1xDeamidated [N3]; 1xPhospho [T1(0); S4(86.9); T5(6.5); S6(6.5)]	NP_032223	0.0113889	0	H1f0	H1.0 linker histone	14958	H1f0	15 E1|15 37.7 cM	protein-coding	-2σ	17.213	16.5791	16.2171	17.3724	17.2185	14.8846	16.374	16.5493	16.5286	16.5024
814	497	Q62511_PGETEEPRSPEQQDQEGGPAAAADAASEELRPGAAAAPAAPAETASSR_1xDeamidated [Q15]; 1xPhospho [S9(90)]_1xDeamidated [Q15]; 1xPhospho [T4(10.1); S9(90); S27(0); T44(0); S46(0); S47(0)]	Q62511	Zfp91	5	5	17.9238	17.541	17.7324	0.0911162	1.30394	1.30394	12Mo-KO_1Way up vs WT	-1.05481	1.79345	0.382879	Q62511	PGETEEPRSPEQQDQEGGPAAAADAASEELRPGAAAAPAAPAETASSR	1xDeamidated [Q15]; 1xPhospho [S9(90)]	1xDeamidated [Q15]; 1xPhospho [T4(10.1); S9(90); S27(0); T44(0); S46(0); S47(0)]	NP_443735	0.013452	0	Zfp91	zinc finger protein 91	109910	Zfp91	19 A|19 8.73 cM	protein-coding	+1σ	17.7331	17.6776	17.1089	17.92	17.2652	17.8064	18.2417	17.9748	18.1017	17.4946
2705	498	E9QQ25_DQEAPSPEALPSPGQESPDGPSPR_1xPhospho [S17(100)]_1xPhospho [S6(0); S12(0); S17(100); S22(0)]	E9QQ25	Speg	5	5	20.3736	20.869	20.6213	0.0926215	0.709355	-1.40973	12Mo-KO_1Way down vs WT	-2.13429	1.07394	-0.495419	E9QQ25	DQEAPSPEALPSPGQESPDGPSPR	1xPhospho [S17(100)]	1xPhospho [S6(0); S12(0); S17(100); S22(0)]	NP_031489	0.000622611	0	Speg	SPEG complex locus	11790	Speg	1 C4|1 38.88 cM	protein-coding	-1σ	21.0364	20.9755	21.0855	19.9772	21.2703	20.7071	20.1027	20.555	20.4196	20.0835
400	499	P35564_SDAEEDGVTGSQDEEDSKPK_1xPhospho [S11(100)]_1xPhospho [S1(0); T9(0); S11(100); S17(0)]	P35564	Canx	5	5	22.5993	22.3117	22.4555	0.0928227	1.2206	1.2206	12Mo-KO_1Way up vs WT	-1.04247	1.55314	0.287595	P35564	SDAEEDGVTGSQDEEDSKPK	1xPhospho [S11(100)]	1xPhospho [S1(0); T9(0); S11(100); S17(0)]	NP_001103969	6.34881e-06	0	Canx	calnexin	12330	Canx	11 B1.3|11 30.46 cM	protein-coding	+1σ	22.0579	22.5194	22.1059	22.157	22.7184	22.5047	22.8915	22.5401	22.5924	22.468
2421	500	Q80YR5_APTAALSPEPQDSKEDVK_1xPhospho [S7(100)]_1xPhospho [T3(0); S7(100); S13(0)]	Q80YR5	Safb2	5	5	19.2523	18.7646	19.0084	0.0929366	1.40227	1.40227	12Mo-KO_1Way up vs WT	-1.07326	2.11041	0.48776	Q80YR5	APTAALSPEPQDSKEDVK	1xPhospho [S7(100)]	1xPhospho [T3(0); S7(100); S13(0)]	NP_001025150	0.0042747	0	Safb2	scaffold attachment factor B2	224902	Safb2	17|17 D	protein-coding	+1σ	17.8685	18.851	18.851	19.3361	18.9162	19.2436	19.4057	19.008	19.1402	19.4642
605	501	P83917_KADSDSEDKGEESKPK_1xPhospho [S4(100)]_1xPhospho [S4(100); S6(0); S13(0)]	P83917	Cbx1	5	5	20.9614	19.4949	20.2281	0.0930301	2.76343	2.76343	12Mo-KO_1Way up vs WT	-1.23738	9.44926	1.46646	P83917	KADSDSEDKGEESKPK	1xPhospho [S4(100)]	1xPhospho [S4(100); S6(0); S13(0)]	NP_031648	1.88705e-05	0	Cbx1	chromobox 1	12412	Cbx1	11 D|11 60.11 cM	protein-coding	+3σ	17.1264	20.2636	20.2721	18.7459	21.0666	21.4679	21.6303	21.1596	20.6684	19.8808
2756	502	Q8C9H6_AASPPSYTLDLGESQLAPPPSK_1xDeamidated [Q15]; 1xPhospho [S3(99.4)]_1xDeamidated [Q15]; 1xPhospho [S3(99.4); S6(0.6); Y7(0); T8(0); S14(0); S21(0)]	Q8C9H6	Strip2	5	5	17.7428	18.1605	17.9517	0.0936391	0.748652	-1.33573	12Mo-KO_1Way down vs WT	-1.89724	1.06336	-0.417632	Q8C9H6	AASPPSYTLDLGESQLAPPPSK	1xDeamidated [Q15]; 1xPhospho [S3(99.4)]	1xDeamidated [Q15]; 1xPhospho [S3(99.4); S6(0.6); Y7(0); T8(0); S14(0); S21(0)]	NP_001032829	0.00286662	0	Strip2	striatin interacting protein 2	320609	Strip2	6|6 A3.3	protein-coding	-1σ	17.6081	18.2493	18.1424	18.5595	18.2429	17.3324	18.238	17.7922	17.5033	17.8482
915	503	A6X940_LDDQSEDEALELEGPLIMPGSGTDVLYIGPLK_1xDeamidated [Q4]; 1xPhospho [S5(100)]_1xDeamidated [Q4]; 1xPhospho [S5(100); S21(0); T23(0); Y27(0)]	A6X940	---	5	5	13.9849	15.0952	14.5401	0.093866	0.463208	-2.15886	12Mo-KO_1Way down vs WT	-5.49182	1.17833	-1.11027	A6X940	LDDQSEDEALELEGPLIMPGSGTDVLYIGPLK	1xDeamidated [Q4]; 1xPhospho [S5(100)]	1xDeamidated [Q4]; 1xPhospho [S5(100); S21(0); T23(0); Y27(0)]	---	0.00524492	0	Fermt2	fermitin family member 2	218952	Fermt2	14|14 C1	protein-coding	-2σ	15.9911	15.9911	14.5416	15.5098	13.4424	14.0452	12.8784	13.8284	14.7147	14.4579
3144	504	P62996_RRSPSPYYSR_2xPhospho [S3(100); S5(100)]_2xPhospho [S3(100); S5(100); Y7(0); Y8(0); S9(0)]	P62996	Tra2b	5	5	19.7371	18.8584	19.2978	0.09397	1.83871	1.83871	12Mo-KO_1Way up vs WT	-1.139	3.85081	0.878694	P62996	RRSPSPYYSR	2xPhospho [S3(100); S5(100)]	2xPhospho [S3(100); S5(100); Y7(0); Y8(0); S9(0)]	NP_001317483	0.0701972	0.00104129	Tra2b	transformer 2 beta	20462	Tra2b	16 B1|16 13.18 cM	protein-coding	+2σ	17.5299	18.9828	19.1877	19.6563	18.9351	18.8626	19.9461	19.265	20.4904	20.1211
2870	505	E9Q1U2_AQSPTPSLPASWK_2xPhospho [S3(100); S7(100)]_2xPhospho [S3(100); T5(0); S7(100); S11(0)]	E9Q1U2	Synpo2	5	5	20.0268	19.7371	19.8819	0.0940789	1.2224	1.2224	12Mo-KO_1Way up vs WT	-1.04395	1.55993	0.289715	E9Q1U2	AQSPTPSLPASWK	2xPhospho [S3(100); S7(100)]	2xPhospho [S3(100); T5(0); S7(100); S11(0)]	NP_536699	0.00264393	0	Synpo2	synaptopodin 2	118449	Synpo2	3|3 G1	protein-coding	+1σ	19.6894	20.0447	19.9116	19.2832	19.7563	19.9461	19.818	20.1471	20.2738	19.9489
1441	506	P14873_ASLSPMDEPVPDSESPVEK_2xPhospho [S4(87); S15(87)]_2xPhospho [S2(13); S4(87); S13(13); S15(87)]	P14873	Map1b	5	5	16.6544	16.155	16.4047	0.0943727	1.4137	1.4137	12Mo-KO_1Way up vs WT	-1.07745	2.15334	0.499477	P14873	ASLSPMDEPVPDSESPVEK	2xPhospho [S4(87); S15(87)]	2xPhospho [S2(13); S4(87); S13(13); S15(87)]	NP_032660	0.00714533	0	Map1b	microtubule-associated protein 1B	17755	Map1b	13 D1|13 52.9 cM	protein-coding	+1σ	15.5795	15.9127	16.2626	16.2896	16.7304	16.2029	16.2603	16.7781	17.0291	17.0018
2639	507	D3Z080_KPLSVSPSTDGLRSPSPPPR_3xPhospho [S6(98.3); S14(100); S16(100)]_3xPhospho [S4(1.7); S6(98.3); S8(0); T9(0); S14(100); S16(100)]	D3Z080	Sorbs2	5	5	19.9213	19.1459	19.5336	0.0943777	1.71169	1.71169	12Mo-KO_1Way up vs WT	-1.1228	3.28965	0.775417	D3Z080	KPLSVSPSTDGLRSPSPPPR	3xPhospho [S6(98.3); S14(100); S16(100)]	3xPhospho [S4(1.7); S6(98.3); S8(0); T9(0); S14(100); S16(100)]	NP_001297636	0.000637597	0	Sorbs2	sorbin and SH3 domain containing 2	234214	Sorbs2	8|8 B1.1	protein-coding	+2σ	17.9146	19.4798	19.7352	18.6669	19.9327	19.6399	19.8031	19.6899	20.5301	19.9434
1922	508	F7AA26_VKPPPSPTTEGPSLQPDLAPEEAAGTQRPK_1xDeamidated [Q]; 1xPhospho [S/T]_1xDeamidated [Q15; Q27]; 1xPhospho [S6(66.5); T8(15); T9(15); S13(3.5); T26(0)]	F7AA26	---	5	5	17.2322	18.7153	17.9737	0.094946	0.357704	-2.79561	12Mo-KO_1Way down vs WT	-9.77874	1.25121	-1.48316	F7AA26	VKPPPSPTTEGPSLQPDLAPEEAAGTQRPK	1xDeamidated [Q]; 1xPhospho [S/T]	1xDeamidated [Q15; Q27]; 1xPhospho [S6(66.5); T8(15); T9(15); S13(3.5); T26(0)]	---	0.00135194	0	Pakap	paralemmin A kinase anchor protein	677884	Pakap	4 B3|4	protein-coding	-3σ	19.9709	18.4333	18.8487	17.2652	19.0586	18.5527	14.7553	17.4516	17.6176	17.7837
1677	509	Q3UIK0_TSLAGAGR_1xPhospho [S2(98.7)]_1xPhospho [T1(1.4); S2(98.7)]	Q3UIK0	Mybpc3	5	5	20.7165	21.1932	20.9549	0.0950528	0.718587	-1.39162	12Mo-KO_1Way down vs WT	-2.08159	1.07487	-0.476764	Q3UIK0	TSLAGAGR	1xPhospho [S2(98.7)]	1xPhospho [T1(1.4); S2(98.7)]	NP_032679	0.0981162	0.00244569	Mybpc3	myosin binding protein C, cardiac	17868	Mybpc3	2|2 E1	protein-coding	-1σ	21.301	21.291	21.6477	20.8199	20.9065	21.0804	20.4904	21.089	20.8898	20.0327
2542	510	F8WHU5_APSPSQPPKK_1xPhospho [S3(100)]_1xPhospho [S3(100); S5(0)]	F8WHU5	---	5	5	15.3715	14.5071	14.9393	0.0954365	1.8206	1.8206	12Mo-KO_1Way up vs WT	-1.141	3.78196	0.864416	F8WHU5	APSPSQPPKK	1xPhospho [S3(100)]	1xPhospho [S3(100); S5(0)]	---	0.0886323	0.00215274	Pds5b	PDS5 cohesin associated factor B	100710	Pds5b	5|5 G3	protein-coding	+2σ	14.2945	15.4059	14.2945	14.3686	14.1719	14.327	15.5962	14.5647	16.3239	16.0457
1218	511	Q8K3X4_KASPEPPDSAESALK_1xPhospho [S3(100)]_1xPhospho [S3(100); S9(0); S12(0)]	Q8K3X4	Irf2bpl	5	5	17.3699	16.8161	17.093	0.0954824	1.46797	1.46797	12Mo-KO_1Way up vs WT	-1.08827	2.34517	0.553827	Q8K3X4	KASPEPPDSAESALK	1xPhospho [S3(100)]	1xPhospho [S3(100); S9(0); S12(0)]	NP_665835	0.0201552	0.000280731	Irf2bpl	interferon regulatory factor 2 binding protein-like	238330	Irf2bpl	12|12 D2	protein-coding	+1σ	16.1875	16.6511	16.4085	17.7524	17.0809	17.3832	17.5388	17.1694	17.1405	17.6176
1690	512	Q9JJW5_VDGSNLEGGSQQGPSTPPNTPDPRSPPNPENIAPGYSGPLK_3xPhospho [S15(96.2); T16(93.3); S25(97.4)]_3xPhospho [S4(0.9); S10(1.4); S15(96.2); T16(93.3); T20(10.8); S25(97.4); Y36(0); S37(0)]	Q9JJW5	Myoz2	5	5	19.6345	18.3985	19.0165	0.095514	2.35555	2.35555	12Mo-KO_1Way up vs WT	-1.20794	6.70236	1.23606	Q9JJW5	VDGSNLEGGSQQGPSTPPNTPDPRSPPNPENIAPGYSGPLK	3xPhospho [S15(96.2); T16(93.3); S25(97.4)]	3xPhospho [S4(0.9); S10(1.4); S15(96.2); T16(93.3); T20(10.8); S25(97.4); Y36(0); S37(0)]	NP_067478	0.00285302	0	Myoz2	myozenin 2	59006	Myoz2	3|3 G1	protein-coding	+3σ	17.1389	18.4838	19.6079	16.8472	19.9145	19.3153	19.4232	20.1114	20.1211	19.2017
374	513	A2A5R2_ELEKPMQSKPQSPVIQATAGSPK_2xPhospho [S12(96.8); S21(96.8)]_2xPhospho [S8(3.2); S12(96.8); T18(3.2); S21(96.8)]	A2A5R2	Arfgef2	5	5	17.4986	16.3763	16.9374	0.095557	2.17692	2.17692	12Mo-KO_1Way up vs WT	-1.18729	5.62651	1.12229	A2A5R2	ELEKPMQSKPQSPVIQATAGSPK	2xPhospho [S12(96.8); S21(96.8)]	2xPhospho [S8(3.2); S12(96.8); T18(3.2); S21(96.8)]	NP_001078964	0.00374163	0	Arfgef2	ADP-ribosylation factor guanine nucleotide-exchange factor 2 (brefeldin A-inhibited)	99371	Arfgef2	2|2 H3	protein-coding	+3σ	16.6283	15.7208	15.9293	17.5267	16.0764	17.4354	17.8536	15.7687	17.587	18.8484
2951	514	E9Q0S6_NGTPGGSFVSPSPLSTSSPILSADSTSVGSFPSVVSSDQGPR_1xDeamidated [N1]; 1xPhospho [S30(83.9)]_1xDeamidated [N1; Q39]; 1xPhospho [T3(0); S7(0); S10(0); S12(0); S15(0); T16(0); S17(0); S18(0); S22(0.1); S25(0.9); T26(2.6); S27(8); S30(83.9); S33(2.6); S36(0.9);ｪ'ﾖ$b*	E9Q0S6	Tns1	5	5	15.7896	16.5135	16.1516	0.0961984	0.605452	-1.65166	12Mo-KO_1Way down vs WT	-3.05173	1.11868	-0.723916	E9Q0S6	NGTPGGSFVSPSPLSTSSPILSADSTSVGSFPSVVSSDQGPR	1xDeamidated [N1]; 1xPhospho [S30(83.9)]	1xDeamidated [N1; Q39]; 1xPhospho [T3(0); S7(0); S10(0); S12(0); S15(0); T16(0); S17(0); S18(0); S22(0.1); S25(0.9); T26(2.6); S27(8); S30(83.9); S33(2.6); S36(0.9);ｪ'ﾖ$b*	NP_082160	0.0256891	0.000280731	Tns1	tensin 1	21961	Tns1	1 C3|1 38.17 cM	protein-coding	-2σ	16.7419	16.3333	16.6615	15.9742	16.8566	17.0396	15.3974	15.0693	15.4119	16.0297
1037	515	E9QP99_SSTSVVSEVSPSSETDNR_1xPhospho [T3(84.3)]_1xPhospho [S1(7.8); S2(7.8); T3(84.3); S4(0.1); S7(0); S10(0); S12(0); S13(0); T15(0)]	E9QP99	Golga3	5	5	16.8488	17.2834	17.0661	0.0963497	0.739902	-1.35153	12Mo-KO_1Way down vs WT	-1.95424	1.06986	-0.434595	E9QP99	SSTSVVSEVSPSSETDNR	1xPhospho [T3(84.3)]	1xPhospho [S1(7.8); S2(7.8); T3(84.3); S4(0.1); S7(0); S10(0); S12(0); S13(0); T15(0)]	NP_001334318	0.00248538	0	Golga3	golgi autoantigen, golgin subfamily a, 3	269682	Golga3	5 F|5 53.36 cM	protein-coding	-1σ	17.6467	17.2211	17.4058	16.4583	17.685	16.9191	16.7346	16.953	16.6754	16.9618
2676	516	Q9JI99_RNSLTGEEGELVK_1xPhospho [T5(94.7)]_1xPhospho [S3(5.3); T5(94.7)]	Q9JI99	Sgpp1	5	5	16.4849	17.5549	17.0199	0.0963924	0.47632	-2.09943	12Mo-KO_1Way down vs WT	-5.20554	1.18104	-1.07	Q9JI99	RNSLTGEEGELVK	1xPhospho [T5(94.7)]	1xPhospho [S3(5.3); T5(94.7)]	NP_109675	0.00542251	0	Sgpp1	sphingosine-1-phosphate phosphatase 1	81535	Sgpp1	12|12 C3	protein-coding	-2σ	17.2595	17.7195	18.5184	17.2449	17.0319	16.9336	14.5066	17.295	16.7656	16.9235
2255	517	Q99N57_STSTPNVHMVSTTLHVDSR_1xPhospho [S/T]_1xPhospho [S1(46.9); T2(46.9); S3(6); T4(0.1); S11(0); T12(0); T13(0); S18(0)]	Q99N57	Raf1	5	5	16.8863	17.5288	17.2076	0.0965194	0.640597	-1.56104	12Mo-KO_1Way down vs WT	-2.69358	1.10535	-0.642511	Q99N57	STSTPNVHMVSTTLHVDSR	1xPhospho [S/T]	1xPhospho [S1(46.9); T2(46.9); S3(6); T4(0.1); S11(0); T12(0); T13(0); S18(0)]	NP_084056	0.00146581	0	Raf1	v-raf-leukemia viral oncogene 1	110157	Raf1	6 E3|6 53.62 cM	protein-coding	-2σ	18.2869	17.5075	17.8923	16.5327	17.4248	16.5638	16.6507	17.2062	17.4111	16.6
1557	518	Q62234_EVSTVSESVQEPLSSPPQEAAPEEEQSQSEPPKK_1xPhospho [S3(80.1)]_1xPhospho [S3(80.1); T4(16); S6(3.3); S8(0.7); S14(0); S15(0); S27(0); S29(0)]	Q62234	Myom1	5	5	18.9	19.5765	19.2383	0.0966239	0.625698	-1.59822	12Mo-KO_1Way down vs WT	-2.83899	1.11146	-0.676463	Q62234	EVSTVSESVQEPLSSPPQEAAPEEEQSQSEPPKK	1xPhospho [S3(80.1)]	1xPhospho [S3(80.1); T4(16); S6(3.3); S8(0.7); S14(0); S15(0); S27(0); S29(0)]	NP_001077403	0.0570625	0.00104129	Myom1	myomesin 1	17929	Myom1	17|17 E1.3	protein-coding	-2σ	19.3586	19.7888	20.2015	18.3163	20.2173	18.7845	19.0579	18.6822	18.9643	19.0113
2893	519	Q8K400_SSSVTSIDKESR_2xPhospho [S3(98.9); S11(82.6)]_2xPhospho [S1(0); S2(0); S3(98.9); T5(9.7); S6(8.8); S11(82.6)]	Q8K400	---	5	5	16.8267	16.2892	16.558	0.0968073	1.4515	1.4515	12Mo-KO_1Way up vs WT	-1.08792	2.29208	0.53754	Q8K400	SSSVTSIDKESR	2xPhospho [S3(98.9); S11(82.6)]	2xPhospho [S1(0); S2(0); S3(98.9); T5(9.7); S6(8.8); S11(82.6)]	---	0.108541	0.00295964	Stxbp5	syntaxin binding protein 5 (tomosyn)	78808	Stxbp5	10|10 A1	protein-coding	+1σ	15.8915	16.6628	17.0853	16.2308	15.5754	16.5624	16.6297	16.9081	16.985	17.0483
2479	520	Q8BTI8_SSSPVTELTAR_1xPhospho [S3(99.5)]_1xPhospho [S1(0); S2(0); S3(99.5); T6(0.5); T9(0)]	Q8BTI8	Srrm2	5	5	19.3849	19.1677	19.2763	0.0970337	1.16251	1.16251	12Mo-KO_1Way up vs WT	-1.0348	1.39845	0.21724	Q8BTI8	SSSPVTELTAR	1xPhospho [S3(99.5)]	1xPhospho [S1(0); S2(0); S3(99.5); T6(0.5); T9(0)]	NP_780438	0.0842203	0.00198899	Srrm2	serine/arginine repetitive matrix 2	75956	Srrm2	17|17 A3.3	protein-coding	+0.5σ	18.96	19.1	19.1363	19.3944	19.2478	19.3955	19.4671	19.5099	19.0367	19.5155
3326	521	E9QQ93_GISLEEGALPDVSATR_1xPhospho [S3(100)]_1xPhospho [S3(100); S13(0); T15(0)]	E9QQ93	Xirp1	5	5	18.6958	19.0357	18.8657	0.0972121	0.790067	-1.26572	12Mo-KO_1Way down vs WT	-1.69044	1.05518	-0.339953	E9QQ93	GISLEEGALPDVSATR	1xPhospho [S3(100)]	1xPhospho [S3(100); S13(0); T15(0)]	NP_035854	0.000134585	0	Xirp1	xin actin-binding repeat containing 1	22437	Xirp1	9|9 F4	protein-coding	-1σ	19.1079	19.0527	18.9019	18.6744	19.4417	18.7805	18.1942	18.7891	18.9492	18.7657
3253	522	F6ZGN3_SASAADVSSR_1xPhospho [S3(100)]_1xPhospho [S1(0); S3(100); S8(0); S9(0)]	F6ZGN3	---	5	5	17.2501	17.7197	17.4849	0.0972316	0.722189	-1.38468	12Mo-KO_1Way down vs WT	-2.06505	1.07704	-0.469552	F6ZGN3	SASAADVSSR	1xPhospho [S3(100)]	1xPhospho [S1(0); S3(100); S8(0); S9(0)]	---	0.0111212	0	Myo18a	myosin XVIIIA	360013	Myo18a	11|11 B5	protein-coding	-1σ	17.7907	18.2028	17.2264	17.3861	17.9923	17.8252	16.782	17.3511	17.1732	17.1191
81	523	E9QK41_STSQGSINSPVYSR_1xPhospho [S3(99.9)]_1xPhospho [S1(0.1); T2(0.1); S3(99.9); S6(0); S9(0); Y12(0); S13(0)]	E9QK41	Ablim1	5	5	21.6006	21.7947	21.6976	0.0973035	0.87409	-1.14405	12Mo-KO_1Way down vs WT	-1.34969	1.03121	-0.194147	E9QK41	STSQGSINSPVYSR	1xPhospho [S3(99.9)]	1xPhospho [S1(0.1); T2(0.1); S3(99.9); S6(0); S9(0); Y12(0); S13(0)]	NP_848803	0.0104047	0	Ablim1	actin-binding LIM protein 1	226251	Ablim1	19 D2|19 52.09 cM	protein-coding	-0.5σ	21.9973	21.5411	21.7897	21.846	21.7995	21.7082	21.3987	21.5663	21.8133	21.5163
606	524	P83917_ADSDSEDKGEESKPK_1xPhospho [S3(100)]_1xPhospho [S3(100); S5(0); S12(0)]	P83917	Cbx1	5	5	16.7062	15.2399	15.9731	0.0978881	2.76318	2.76318	12Mo-KO_1Way up vs WT	-1.2645	9.65466	1.46633	P83917	ADSDSEDKGEESKPK	1xPhospho [S3(100)]	1xPhospho [S3(100); S5(0); S12(0)]	NP_031648	0.021441	0.000280731	Cbx1	chromobox 1	12412	Cbx1	11 D|11 60.11 cM	protein-coding	+3σ	13.9585	16.9321	13.3005	15.6922	16.3161	17.2429	15.3251	16.9176	16.7211	17.3243
357	525	J3QNU6_DDKDEEDDGTGSPHLNNR_1xPhospho [S12(99.3)]_1xPhospho [T10(0.7); S12(99.3)]	J3QNU6	---	5	5	17.8172	17.2843	17.5508	0.0979665	1.44688	1.44688	12Mo-KO_1Way up vs WT	-1.08917	2.28013	0.532941	J3QNU6	DDKDEEDDGTGSPHLNNR	1xPhospho [S12(99.3)]	1xPhospho [T10(0.7); S12(99.3)]	---	0.00707767	0	Arrb1	arrestin, beta 1	109689	Arrb1	7 E1|7 54.09 cM	protein-coding	+1σ	17.1063	17.6081	17.0864	17.3661	17.2544	17.6281	18.6162	16.9618	17.9487	17.9312
2514	526	Q91V89_DGGGENTDEAQPQPQSQSPSSNK_1xPhospho [S16(97.9)]_1xPhospho [T7(0); S16(97.9); S18(1.8); S20(0.3); S21(0)]	Q91V89	Ppp2r5d	5	5	17.4865	17.085	17.2858	0.098274	1.3209	1.3209	12Mo-KO_1Way up vs WT	-1.06687	1.86145	0.401522	Q91V89	DGGGENTDEAQPQPQSQSPSSNK	1xPhospho [S16(97.9)]	1xPhospho [T7(0); S16(97.9); S18(1.8); S20(0.3); S21(0)]	NP_033384	0.0190369	0	Ppp2r5d	protein phosphatase 2, regulatory subunit B', delta	21770	Ppp2r5d	17 22.9 cM|17 C	protein-coding	+1σ	17.0423	16.975	17.0744	16.7269	17.6064	17.8865	17.6597	16.9235	17.4749	17.488
3013	527	Q9Z0U1_DASPPPAFKPEPPK_1xPhospho [S3(100)]_1xPhospho [S3(100)]	Q9Z0U1	Tjp2	5	5	19.6032	19.3808	19.492	0.0988982	1.16662	1.16662	12Mo-KO_1Way up vs WT	-1.03693	1.41127	0.222341	Q9Z0U1	DASPPPAFKPEPPK	1xPhospho [S3(100)]	1xPhospho [S3(100)]	NP_035727	0.0715259	0.00104129	Tjp2	tight junction protein 2	21873	Tjp2	19|19 B	protein-coding	+0.5σ	19.4118	19.1079	19.5758	19.3219	19.4869	19.4152	19.7521	19.3617	19.7302	19.7568
3133	528	O35295_DSLGDFIEHYAQLGPSSPEQLAAGAEEGGGPR_1xPhospho [S17(97)]_1xPhospho [S2(0); Y10(0); S16(3.1); S17(97)]	O35295	Purb	5	5	18.728	19.0615	18.8947	0.0989024	0.793572	-1.26013	12Mo-KO_1Way down vs WT	-1.67671	1.05592	-0.333568	O35295	DSLGDFIEHYAQLGPSSPEQLAAGAEEGGGPR	1xPhospho [S17(97)]	1xPhospho [S2(0); Y10(0); S16(3.1); S17(97)]	NP_035351	0.000248599	0	Purb	purine rich element binding protein B	19291	Purb	11 A1|11 4.16 cM	protein-coding	-1σ	18.7255	19.0328	18.9788	19.5074	19.0633	18.9369	18.2324	18.8006	18.8651	18.8049
1428	529	E9PVY8_EAAVLSEEELDQEVTIGDEPDSFVK_1xDeamidated [Q12]; 1xPhospho [S6(99.5)]_1xDeamidated [Q12]; 1xPhospho [S6(99.5); T15(0.4); S22(0)]	E9PVY8	Macf1	5	5	16.8845	17.6904	17.2874	0.0996806	0.571985	-1.7483	12Mo-KO_1Way down vs WT	-3.49255	1.14265	-0.805951	E9PVY8	EAAVLSEEELDQEVTIGDEPDSFVK	1xDeamidated [Q12]; 1xPhospho [S6(99.5)]	1xDeamidated [Q12]; 1xPhospho [S6(99.5); T15(0.4); S22(0)]	NP_001186065	0.0161172	0	Macf1	microtubule-actin crosslinking factor 1	11426	Macf1	4 D2.2|4 57.42 cM	protein-coding	-2σ	18.8108	16.8931	17.262	17.556	17.93	16.1841	17.459	16.231	17.1206	17.4276
1625	530	O08638_VIENTDGSEEEMDAR_1xPhospho [S8(100)]_1xPhospho [T5(0); S8(100)]	O08638	---	5	5	20.4091	20.0245	20.2168	0.0998483	1.30549	1.30549	12Mo-KO_1Way up vs WT	-1.06591	1.81664	0.384594	O08638	VIENTDGSEEEMDAR	1xPhospho [S8(100)]	1xPhospho [T5(0); S8(100)]	---	0.000409655	0	Myh11	myosin, heavy polypeptide 11, smooth muscle	17880	Myh11	16 A1|16 9.71 cM	protein-coding	+1σ	19.5121	20.1727	19.8838	19.9569	20.5969	20.0613	20.555	20.4499	20.6645	20.3147
239	531	P17426_DTSSNDINGGVEPTPSTVSTPSPSADLLGLR_1xDeamidated [N8]; 1xPhospho [S22(83.6)]_1xDeamidated [N8]; 1xPhospho [T2(0); S3(0); S4(0); T14(0); S16(0); T17(0); S19(0); T20(0); S22(83.6); S24(16.4)]	P17426	Ap2a1	5	5	16.8576	16.344	16.6008	0.100032	1.4276	1.4276	12Mo-KO_1Way up vs WT	-1.08928	2.22001	0.513595	P17426	DTSSNDINGGVEPTPSTVSTPSPSADLLGLR	1xDeamidated [N8]; 1xPhospho [S22(83.6)]	1xDeamidated [N8]; 1xPhospho [T2(0); S3(0); S4(0); T14(0); S16(0); T17(0); S19(0); T20(0); S22(83.6); S24(16.4)]	NP_001070732	0.03849	0.00049971	Ap2a1	adaptor-related protein complex 2, alpha 1 subunit	11771	Ap2a1	7|7 B3	protein-coding	+1σ	16.8114	15.5754	16.0745	16.7125	16.5463	16.761	16.37	17.0925	17.2605	16.8042
1806	532	P97863_DQDMSSPTTMK_1xPhospho [S6(97.2)]_1xPhospho [S5(1.4); S6(97.2); T8(1.4); T9(0)]	P97863	Nfib	5	5	18.0225	18.3146	18.1685	0.100106	0.81672	-1.22441	12Mo-KO_1Way down vs WT	-1.574	1.04991	-0.292086	P97863	DQDMSSPTTMK	1xPhospho [S6(97.2)]	1xPhospho [S5(1.4); S6(97.2); T8(1.4); T9(0)]	NP_001106680	0.0651151	0.00104129	Nfib	nuclear factor I/B	18028	Nfib	4 C3|4 38.4 cM	protein-coding	-1σ	18.3603	18.1438	18.5754	17.8625	18.6311	17.8762	18.0592	18.0077	17.9127	18.2569
2347	533	G3X8T2_SPQPPSR_1xPhospho [S1(100)]_1xPhospho [S1(100); S6(0)]	G3X8T2	Zc3h18	5	5	14.3905	15.395	14.8927	0.100436	0.498432	-2.00629	12Mo-KO_1Way down vs WT	-4.7639	1.18351	-1.00453	G3X8T2	SPQPPSR	1xPhospho [S1(100)]	1xPhospho [S1(100); S6(0)]	NP_001025164	0.179926	0.00681976	Zc3h18	zinc finger CCCH-type containing 18	76014	Zc3h18	8|8 E1	protein-coding	-2σ	15.3511	15.73	14.7035	15.4444	15.7462	14.7777	15.331	15.3875	13.6789	12.7776
514	534	O54724_GEATDLLRGSSPDVHTLLEITEESDAVLVDK_2xPhospho [S10(100); S11(100)]_2xPhospho [T4(0); S10(100); S11(100); T16(0); T21(0); S24(0)]	O54724	Cavin1	5	5	18.1804	17.499	17.8397	0.100442	1.60366	1.60366	12Mo-KO_1Way up vs WT	-1.12109	2.88313	0.681369	O54724	GEATDLLRGSSPDVHTLLEITEESDAVLVDK	2xPhospho [S10(100); S11(100)]	2xPhospho [T4(0); S10(100); S11(100); T16(0); T21(0); S24(0)]	NP_033012	0.000622611	0	Cavin1	caveolae associated 1	19285	Cavin1	11 D|11 63.95 cM	protein-coding	+2σ	16.4564	17.4667	18.0228	17.517	18.0322	17.3965	18.1033	18.3631	18.8049	18.2342
491	535	Q9JMK2_IQQTGNTSPR_1xPhospho [S8(98.9)]_1xPhospho [T4(0); T7(1.1); S8(98.9)]	Q9JMK2	Csnk1e	5	5	15.6976	15.9881	15.8429	0.10145	0.817601	-1.22309	12Mo-KO_1Way down vs WT	-1.57205	1.05087	-0.290532	Q9JMK2	IQQTGNTSPR	1xPhospho [S8(98.9)]	1xPhospho [T4(0); T7(1.1); S8(98.9)]	NP_001276827	0.0258116	0.000280731	Csnk1e	casein kinase 1, epsilon	27373	Csnk1e	15|15 E1	protein-coding	-1σ	16.2839	16.2822	15.791	15.7186	15.8649	15.9826	15.8439	15.6169	15.6269	15.4176
3106	536	P70399_SDSPEIPFQAATGSSDGLDSSSSGNSFVGLR_1xPhospho [S3(85.6)]_1xPhospho [S1(14.4); S3(85.6); T12(0); S14(0); S15(0); S20(0); S21(0); S22(0); S23(0); S26(0)]	P70399	Trp53bp1	5	5	17.8226	17.4095	17.6161	0.101603	1.33149	1.33149	12Mo-KO_1Way up vs WT	-1.07329	1.90279	0.413042	P70399	SDSPEIPFQAATGSSDGLDSSSSGNSFVGLR	1xPhospho [S3(85.6)]	1xPhospho [S1(14.4); S3(85.6); T12(0); S14(0); S15(0); S20(0); S21(0); S22(0); S23(0); S26(0)]	NP_001277759	0.00847998	0	Trp53bp1	transformation related protein 53 binding protein 1	27223	Trp53bp1	2|2 E5	protein-coding	+1σ	17.4499	17.7386	17.3117	17.1504	17.3971	17.7922	17.1248	17.7527	18.2149	18.2281
456	537	E9QLJ0_KRNSLESQDVLTNQEDGPSISESPVLNIENEK_1xPhospho [S4(100)]_1xPhospho [S4(100); S7(0); T12(0); S19(0); S21(0); S23(0)]	E9QLJ0	Cmya5	5	5	21.2305	21.4702	21.3503	0.101677	0.846896	-1.18078	12Mo-KO_1Way down vs WT	-1.45275	1.04196	-0.239744	E9QLJ0	KRNSLESQDVLTNQEDGPSISESPVLNIENEK	1xPhospho [S4(100)]	1xPhospho [S4(100); S7(0); T12(0); S19(0); S21(0); S23(0)]	NP_076310	1.80796e-05	0	Cmya5	cardiomyopathy associated 5	76469	Cmya5	13|13 C3	protein-coding	-0.5σ	21.4341	21.6164	21.4257	21.1897	21.6853	21.3864	21.3275	21.0094	20.9869	21.4422
3053	538	A2ASS6_SPEPVTSHPK_1xPhospho [S1(100)]_1xPhospho [S1(100); T6(0); S7(0)]	A2ASS6	---	5	5	22.4543	22.7709	22.6126	0.101697	0.802954	-1.2454	12Mo-KO_1Way down vs WT	-1.63758	1.0558	-0.31661	A2ASS6	SPEPVTSHPK	1xPhospho [S1(100)]	1xPhospho [S1(100); T6(0); S7(0)]	---	0.00820226	0	Ttn	titin	22138	Ttn	2 C3|2 45.13 cM	protein-coding	-1σ	22.7371	22.9688	22.5898	22.9688	22.5898	22.7881	22.5568	22.7212	22.1268	22.0785
3207	539	P35235_YSLVDQTSGDQSPLPPCTPTPPCAEMR_2xCarbamidomethyl [C17; C23]; 1xPhospho [S2(87.9)]_2xCarbamidomethyl [C17; C23]; 1xPhospho [Y1(0); S2(87.9); T7(5.3); S8(5.3); S12(0.1); T18(1.4); T20(0)]	P35235	Ptpn11	5	5	17.0778	17.7654	17.4216	0.10193	0.620913	-1.61053	12Mo-KO_1Way down vs WT	-2.91985	1.1257	-0.687538	P35235	YSLVDQTSGDQSPLPPCTPTPPCAEMR	2xCarbamidomethyl [C17; C23]; 1xPhospho [S2(87.9)]	2xCarbamidomethyl [C17; C23]; 1xPhospho [Y1(0); S2(87.9); T7(5.3); S8(5.3); S12(0.1); T18(1.4); T20(0)]	NP_001103462	0.0985691	0.00244569	Ptpn11	protein tyrosine phosphatase, non-receptor type 11	19247	Ptpn11	5|5 F	protein-coding	-2σ	18.2469	17.7921	16.5888	18.3184	17.8808	17.4084	16.7211	16.4623	17.4809	17.3166
2935	540	E9Q0S6_HPVGSHQVPGLHSSVVTTPGSPSLGR_1xPhospho [S21(98.9)]_1xPhospho [S5(0); S13(0); S14(0); T17(0); T18(0); S21(98.9); S23(1.1)]	E9Q0S6	Tns1	5	5	19.8327	20.2417	20.0372	0.10219	0.753165	-1.32773	12Mo-KO_1Way down vs WT	-1.8921	1.07331	-0.408962	E9Q0S6	HPVGSHQVPGLHSSVVTTPGSPSLGR	1xPhospho [S21(98.9)]	1xPhospho [S5(0); S13(0); S14(0); T17(0); T18(0); S21(98.9); S23(1.1)]	NP_082160	0.00121761	0	Tns1	tensin 1	21961	Tns1	1 C3|1 38.17 cM	protein-coding	-1σ	20.4432	20.0177	20.5225	20.338	19.887	20.1419	19.3231	19.9529	19.4827	20.263
2374	541	Q9CXK9_DIKEESDEEDDDDEESGR_1xPhospho [S6(100)]_1xPhospho [S6(100); S16(0)]	Q9CXK9	Rbm33	5	5	15.7127	16.235	15.9739	0.102268	0.696253	-1.43626	12Mo-KO_1Way down vs WT	-2.25818	1.0947	-0.522316	Q9CXK9	DIKEESDEEDDDDEESGR	1xPhospho [S6(100)]	1xPhospho [S6(100); S16(0)]	NP_082510	0.00265654	0	Rbm33	RNA binding motif protein 33	381626	Rbm33	5|5 B1	protein-coding	-1σ	16.5613	15.9243	16.3333	16.2429	16.1132	15.6169	15.3749	16.5024	16.0662	15.0031
12	542	P58871_SSGSLSPGLETEDPLEAR_1xPhospho [S6(88.1)]_1xPhospho [S1(0.2); S2(0.2); S4(11.4); S6(88.1); T11(0)]	P58871	Tnks1bp1	5	5	16.8006	17.2964	17.0485	0.104011	0.709195	-1.41005	12Mo-KO_1Way down vs WT	-2.17213	1.09249	-0.495746	P58871	SSGSLSPGLETEDPLEAR	1xPhospho [S6(88.1)]	1xPhospho [S1(0.2); S2(0.2); S4(11.4); S6(88.1); T11(0)]	NP_001074729	0.00450433	0	Tnks1bp1	tankyrase 1 binding protein 1	228140	Tnks1bp1	2|2 D	protein-coding	-1σ	17.1023	17.0177	16.7933	17.7752	17.7933	16.9768	16.8556	17.1163	16.1188	16.9356
2971	543	Q8CGB6_HLPGSGQQPSPPAR_1xPhospho [S10(100)]_1xPhospho [S5(0); S10(100)]	Q8CGB6	Tns2	5	5	19.0634	18.5816	18.8225	0.104646	1.39651	1.39651	12Mo-KO_1Way up vs WT	-1.09077	2.12726	0.481824	Q8CGB6	HLPGSGQQPSPPAR	1xPhospho [S10(100)]	1xPhospho [S5(0); S10(100)]	NP_705761	0.1004	0.00244569	Tns2	tensin 2	209039	Tns2	15 F2|15 57.29 cM	protein-coding	+1σ	18.4222	18.9258	17.8508	19.2121	18.497	18.6103	19.3153	19.2017	19.0113	19.1785
2028	544	Q68FH0_VGSPLTLTDAQTR_1xPhospho [S3(99.9)]_1xPhospho [S3(99.9); T6(0.1); T8(0); T12(0)]	Q68FH0	Pkp4	5	5	17.2906	16.8354	17.063	0.104825	1.37092	1.37092	12Mo-KO_1Way up vs WT	-1.0858	2.04068	0.455146	Q68FH0	VGSPLTLTDAQTR	1xPhospho [S3(99.9)]	1xPhospho [S3(99.9); T6(0.1); T8(0); T12(0)]	NP_080637	0.0692162	0.00104129	Pkp4	plakophilin 4	227937	Pkp4	2|2 C1.1	protein-coding	+1σ	17.5378	16.7647	16.9697	16.4564	16.4486	17.6103	17.2576	17.4276	16.7491	17.4084
2232	545	A2A4P5_RPPPAMDDLDDDSDS_1xPhospho [S13(93.2)]_1xPhospho [S13(93.2); S15(6.8)]	A2A4P5	---	5	5	19.2205	18.4073	18.8139	0.104862	1.75704	1.75704	12Mo-KO_1Way up vs WT	-1.15853	3.57662	0.813149	A2A4P5	RPPPAMDDLDDDSDS	1xPhospho [S13(93.2)]	1xPhospho [S13(93.2); S15(6.8)]	---	0.113095	0.00309639	Ptges3l	prostaglandin E synthase 3 like	73635	Ptges3l	11|11 D	protein-coding	+2σ	17.588	18.9977	19.3064	17.1587	18.9859	19.0497	19.3643	19.1126	19.5728	19.003
2461	546	Q52KI8_APKPEPVPEPKEPSPEK_1xPhospho [S14(100)]_1xPhospho [S14(100)]	Q52KI8	Srrm1	5	5	15.9079	15.3494	15.6287	0.104989	1.4728	1.4728	12Mo-KO_1Way up vs WT	-1.1066	2.40038	0.558565	Q52KI8	APKPEPVPEPKEPSPEK	1xPhospho [S14(100)]	1xPhospho [S14(100)]	NP_058079	0.198774	0.00776817	Srrm1	serine/arginine repetitive matrix 1	51796	Srrm1	4|4 D3	protein-coding	+1σ	15.3143	15.6347	15.3511	15.6893	14.7574	14.9475	15.8356	16.3929	16.1258	16.2379
411	547	P51125_SLSESELIGELSADFDR_1xPhospho [S3(88.6)]_1xPhospho [S1(11.2); S3(88.6); S5(0.2); S12(0)]	P51125	Cast	5	5	15.7972	15.4563	15.6267	0.105024	1.2666	1.2666	12Mo-KO_1Way up vs WT	-1.06382	1.70665	0.340957	P51125	SLSESELIGELSADFDR	1xPhospho [S3(88.6)]	1xPhospho [S1(11.2); S3(88.6); S5(0.2); S12(0)]	NP_001288082	0.00526993	0	Cast	calpastatin	12380	Cast	13|13 C1	protein-coding	+1σ	15.9713	15.5903	15.4526	15.1372	15.13	16.1765	15.7517	15.7275	15.7627	15.5677
3228	548	E9PV45_VSDQNSPVLPK_1xDeamidated [Q/N]; 1xPhospho [S6(100)]_1xDeamidated [Q4; N5]; 1xPhospho [S2(0); S6(100)]	E9PV45	---	5	5	15.8184	15.3104	15.5644	0.105158	1.4221	1.4221	12Mo-KO_1Way up vs WT	-1.09678	2.21808	0.508018	E9PV45	VSDQNSPVLPK	1xDeamidated [Q/N]; 1xPhospho [S6(100)]	1xDeamidated [Q4; N5]; 1xPhospho [S2(0); S6(100)]	---	0.00910716	0	Usp24	ubiquitin specific peptidase 24	329908	Usp24	4|4 C7	protein-coding	+1σ	15.4484	15.8125	14.5175	15.4059	15.3678	15.8001	15.447	15.4119	16.3	16.1333
3294	549	P20152_QVQSLTCEVDALK_1xCarbamidomethyl [C7]; 1xPhospho [S4(98.7)]_1xCarbamidomethyl [C7]; 1xPhospho [S4(98.7); T6(1.3)]	P20152	Vim	5	5	17.6756	17.9449	17.8102	0.105884	0.829729	-1.20521	12Mo-KO_1Way down vs WT	-1.52633	1.0508	-0.269288	P20152	QVQSLTCEVDALK	1xCarbamidomethyl [C7]; 1xPhospho [S4(98.7)]	1xCarbamidomethyl [C7]; 1xPhospho [S4(98.7); T6(1.3)]	NP_035831	0.0217492	0.000280731	Vim	vimentin	22352	Vim	2 A1|2 10.04 cM	protein-coding	-0.5σ	18.159	17.9033	17.9503	18.0241	17.6879	18.0552	17.6088	17.7889	17.6425	17.2827
2671	550	Q62261_VSEEAESQQWDTSKGDQVSQNGLPAEQGSPR_3xDeamidated [Q/N]; 1xPhospho [S29(75.8)]_3xDeamidated [Q8; Q9; Q17; Q20; N21; Q27]; 1xPhospho [S2(0); S7(0.1); T12(1.2); S13(18.3); S19(4.6); S29(75.8)]	Q62261	Sptbn1	5	5	20.1669	20.6526	20.4097	0.106277	0.714127	-1.40031	12Mo-KO_1Way down vs WT	-2.14542	1.09411	-0.485748	Q62261	VSEEAESQQWDTSKGDQVSQNGLPAEQGSPR	3xDeamidated [Q/N]; 1xPhospho [S29(75.8)]	3xDeamidated [Q8; Q9; Q17; Q20; N21; Q27]; 1xPhospho [S2(0); S7(0.1); T12(1.2); S13(18.3); S19(4.6); S29(75.8)]	NP_033286	0.000527121	0	Sptbn1	spectrin beta, non-erythrocytic 1	20742	Sptbn1	11 A3.3|11 17.44 cM	protein-coding	-1σ	20.5225	20.5036	21.0027	20.8484	20.3858	19.4313	20.4499	20.6645	19.7675	20.5211
405	551	P35564_QKSDAEEDGVTGSQDEEDSKPK_2xPhospho [S3(100); S13(99.2)]_2xPhospho [S3(100); T11(0.4); S13(99.2); S19(0.4)]	P35564	Canx	5	5	21.8529	20.9811	21.417	0.106927	1.82991	1.82991	12Mo-KO_1Way up vs WT	-1.17716	3.94179	0.871771	P35564	QKSDAEEDGVTGSQDEEDSKPK	2xPhospho [S3(100); S13(99.2)]	2xPhospho [S3(100); T11(0.4); S13(99.2); S19(0.4)]	NP_001103969	0.000117243	0	Canx	calnexin	12330	Canx	11 B1.3|11 30.46 cM	protein-coding	+2σ	19.2978	21.6748	21.5698	20.5526	21.8107	21.7568	21.9638	21.7568	22.0388	21.7482
486	552	E9QLJ0_STVEESSEEATK_1xPhospho [T11(81.2)]_1xPhospho [S1(0); T2(0); S6(9.4); S7(9.4); T11(81.2)]	E9QLJ0	Cmya5	5	5	14.1822	14.5943	14.3882	0.107043	0.751503	-1.33067	12Mo-KO_1Way down vs WT	-1.91289	1.08031	-0.41215	E9QLJ0	STVEESSEEATK	1xPhospho [T11(81.2)]	1xPhospho [S1(0); T2(0); S6(9.4); S7(9.4); T11(81.2)]	NP_076310	0.177587	0.00667009	Cmya5	cardiomyopathy associated 5	76469	Cmya5	13|13 C3	protein-coding	-1σ	14.6668	13.857	14.8862	14.8581	14.7035	13.8559	13.9228	14.2492	14.4035	14.4795
891	553	Q8BGD9_TGSESSQTGASATSGR_1xPhospho [S3(99.9)]_1xPhospho [T1(0.1); S3(99.9); S5(0); S6(0); T8(0); S11(0); T13(0); S14(0)]	Q8BGD9	Eif4b	5	5	17.8288	18.378	18.1034	0.107173	0.683384	-1.46331	12Mo-KO_1Way down vs WT	-2.37395	1.10867	-0.549231	Q8BGD9	TGSESSQTGASATSGR	1xPhospho [S3(99.9)]	1xPhospho [T1(0.1); S3(99.9); S5(0); S6(0); T8(0); S11(0); T13(0); S14(0)]	NP_663600	0.000115582	0	Eif4b	eukaryotic translation initiation factor 4B	75705	Eif4b	15|15 F2	protein-coding	-1σ	18.497	18.4368	18.195	18.1082	18.653	18.0318	17.9383	18.7092	17.448	17.0165
1333	554	Q9ERG0_SDNEETLGRPAQPPNAGESPHSPGVEDAPIAK_1xPhospho [S22(100)]_1xPhospho [S1(0); T6(0); S19(0); S22(100)]	Q9ERG0	Lima1	5	5	17.4803	18.5262	18.0033	0.108064	0.484324	-2.06473	12Mo-KO_1Way down vs WT	-5.20288	1.22044	-1.04595	Q9ERG0	SDNEETLGRPAQPPNAGESPHSPGVEDAPIAK	1xPhospho [S22(100)]	1xPhospho [S1(0); T6(0); S19(0); S22(100)]	NP_001107017	0.0147946	0	Lima1	LIM domain and actin binding 1	65970	Lima1	15 F1|15 56.13 cM	protein-coding	-2σ	17.0563	18.4255	19.4224	18.7825	18.9445	16.0117	17.891	17.1715	18.4057	17.9215
3084	555	A2ASS6_TPSPIEAER_1xPhospho [S3(100)]_1xPhospho [T1(0); S3(100)]	A2ASS6	---	5	5	21.3491	21.4982	21.4236	0.108097	0.901787	-1.10891	12Mo-KO_1Way down vs WT	-1.26513	1.02883	-0.149141	A2ASS6	TPSPIEAER	1xPhospho [S3(100)]	1xPhospho [T1(0); S3(100)]	---	0.0381256	0.00049971	Ttn	titin	22138	Ttn	2 C3|2 45.13 cM	protein-coding	-0.5σ	21.394	21.407	21.4741	21.5791	21.6368	21.2167	21.5023	21.5163	21.2984	21.2115
2132	556	Q8C1D8_QKIDSDDDEEKEGDEEK_1xPhospho [S5(100)]_1xPhospho [S5(100)]	Q8C1D8	Iws1	5	5	16.4944	15.8574	16.1759	0.108228	1.55505	1.55505	12Mo-KO_1Way up vs WT	-1.12933	2.73092	0.636961	Q8C1D8	QKIDSDDDEEKEGDEEK	1xPhospho [S5(100)]	1xPhospho [S5(100)]	NP_775617	0.0152956	0	Iws1	IWS1, SUPT6 interacting protein	73473	Iws1	18|18 B1	protein-coding	+2σ	15.9388	15.1372	15.9181	15.7818	16.5113	15.8615	16.925	15.7925	17.0746	16.8183
3140	557	Q61687_TTSTSNPSSPAPDWYKDFVTDTDAEVLEHSGK_2xPhospho [T/S/Y]_2xPhospho [T1(11.9); T2(43); S3(43); T4(1); S5(1); S8(0.1); S9(0.4); Y15(3.8); T20(47.8); T22(47.8); S30(0)]	Q61687	Atrx	5	5	15.2952	16.1589	15.7271	0.108582	0.549566	-1.81962	12Mo-KO_1Way down vs WT	-3.90813	1.18035	-0.863634	Q61687	TTSTSNPSSPAPDWYKDFVTDTDAEVLEHSGK	2xPhospho [T/S/Y]	2xPhospho [T1(11.9); T2(43); S3(43); T4(1); S5(1); S8(0.1); S9(0.4); Y15(3.8); T20(47.8); T22(47.8); S30(0)]	NP_033556	0.128992	0.00337228	Atrx	ATRX, chromatin remodeler	22589	Atrx	X D|X 47.26 cM	protein-coding	-2σ	16.3536	17.1872	15.612	15.8596	15.7818	14.5164	14.6423	15.5131	16.6542	15.1501
2115	558	A2A841_SLDGAAAAESTDRSPRPTSAPAIAQSQVTEGPGAPIKK_1xPhospho [S1(99.6)]_1xPhospho [S1(99.6); S10(0.2); T11(0.2); S14(0.2); T18(0); S19(0); S26(0); T29(0)]	A2A841	---	5	5	17.1498	16.2641	16.7069	0.10861	1.84769	1.84769	12Mo-KO_1Way up vs WT	-1.18545	4.04706	0.885721	A2A841	SLDGAAAAESTDRSPRPTSAPAIAQSQVTEGPGAPIKK	1xPhospho [S1(99.6)]	1xPhospho [S1(99.6); S10(0.2); T11(0.2); S14(0.2); T18(0); S19(0); S26(0); T29(0)]	---	0.0100162	0	Epb41	erythrocyte membrane protein band 4.1	269587	Epb41	4 D2.3|4 64.54 cM	protein-coding	+2σ	16.9907	15.5589	16.3175	16.6237	15.8296	17.6703	17.4451	15.7196	16.7959	18.1181
1412	559	A0A0R4J1I3_GGQEVGNAAQAPAPAASPPPEGPVLTFQSEK_1xPhospho [S17(100)]_1xPhospho [S17(100); T26(0); S29(0)]	A0A0R4J1I3	Men1	5	5	16.3833	15.9018	16.1425	0.109164	1.39624	1.39624	12Mo-KO_1Way up vs WT	-1.09777	2.14009	0.48155	A0A0R4J1I3	GGQEVGNAAQAPAPAASPPPEGPVLTFQSEK	1xPhospho [S17(100)]	1xPhospho [S17(100); T26(0); S29(0)]	NP_001161960	0.0121731	0	Men1	multiple endocrine neoplasia 1	17283	Men1	19|19 A	protein-coding	+1σ	16.715	16.1875	15.7164	15.1768	15.7133	16.4876	16.143	16.3518	16.5204	16.4139
235	560	S4R2S8; S4R1S2_MNVPETMNEVLDMSDDEGEDAITGDTDK_2xDeamidated [N2; N8]; 1xPhospho [S14(77.4)]_2xDeamidated [N2; N8]; 1xPhospho [T6(20.6); S14(77.4); T23(1.8); T26(0.2)]	S4R2S8; S4R1S2	---	5	5	19.7131	19.3659	19.5395	0.110087	1.2721	1.2721	12Mo-KO_1Way up vs WT	-1.07058	1.73244	0.347207	S4R2S8; S4R1S2	MNVPETMNEVLDMSDDEGEDAITGDTDK	2xDeamidated [N2; N8]; 1xPhospho [S14(77.4)]	2xDeamidated [N2; N8]; 1xPhospho [T6(20.6); S14(77.4); T23(1.8); T26(0.2)]	---	0.000446277	0	Ank3	ankyrin 3, epithelial	11735	Ank3	10 B5.3|10 36.1 cM	protein-coding	+1σ	19.0477	19.2591	19.4841	19.9327	19.1057	19.8359	19.9325	19.3807	19.5385	19.8776
1906	561	A0A0R4J0J0_HSPLDVPVAGDGTEDPSLTALR_1xPhospho [S2(100)]_1xPhospho [S2(100); T13(0); S17(0); T19(0)]	A0A0R4J0J0	Palmd	5	5	16.6429	16.9041	16.7735	0.110155	0.83436	-1.19852	12Mo-KO_1Way down vs WT	-1.51218	1.05271	-0.261257	A0A0R4J0J0	HSPLDVPVAGDGTEDPSLTALR	1xPhospho [S2(100)]	1xPhospho [S2(100); T13(0); S17(0); T19(0)]	NP_075734	0.0419292	0.000921163	Palmd	palmdelphin	114301	Palmd	3 G1|3 50.49 cM	protein-coding	-0.5σ	17.2829	16.6941	16.9002	16.9075	16.7361	16.9653	16.6169	16.5459	16.3518	16.7346
2194	562	Q9DCL8_IDEPNTPYHNMIGDDEDAYSDSEGNEVMTPDILAK_1xPhospho [T/S/Y]_1xPhospho [T6(72); Y8(0); Y19(0); S20(4.9); S22(18.3); T29(4.9)]	Q9DCL8	Ppp1r2	5	5	19.9018	19.122	19.5119	0.110331	1.71689	1.71689	12Mo-KO_1Way up vs WT	-1.16618	3.43758	0.779801	Q9DCL8	IDEPNTPYHNMIGDDEDAYSDSEGNEVMTPDILAK	1xPhospho [T/S/Y]	1xPhospho [T6(72); Y8(0); Y19(0); S20(4.9); S22(18.3); T29(4.9)]	NP_080076	0.0228087	0.000280731	Ppp1r2	protein phosphatase 1, regulatory inhibitor subunit 2	66849	Ppp1r2	16 B2|16 21.41 cM	protein-coding	+2σ	17.8182	18.5577	19.3772	20.1121	19.7447	20.0252	19.4445	20.2113	19.8903	19.9374
313	563	Q810A7_YMAENPTAGVVQEEEEDNLEYDSDGNPIAPSKK_1xPhospho [S31(92.4)]_1xPhospho [Y1(0); T7(0.1); Y21(0); S23(7.6); S31(92.4)]	Q810A7	Ddx42	5	5	17.6111	18.1114	17.8612	0.110347	0.706952	-1.41452	12Mo-KO_1Way down vs WT	-2.20834	1.10369	-0.500315	Q810A7	YMAENPTAGVVQEEEEDNLEYDSDGNPIAPSKK	1xPhospho [S31(92.4)]	1xPhospho [Y1(0); T7(0.1); Y21(0); S23(7.6); S31(92.4)]	NP_082350	0.0454559	0.000921163	Ddx42	DEAD box helicase 42	72047	Ddx42	11|11 E1	protein-coding	-1σ	18.1765	17.5739	18.8335	17.7039	18.2692	17.8808	18.1278	17.3311	17.3324	17.3832
695	564	A0A1L1SQR4_TGPEDVDDPQHCSGSPEDTPR_1xCarbamidomethyl [C12]; 1xPhospho [S13(79.4)]_1xCarbamidomethyl [C12]; 1xPhospho [T1(0); S13(79.4); S15(10.3); T19(10.3)]	A0A1L1SQR4	Dock6	5	5	17.5289	16.6403	17.0846	0.110592	1.85147	1.85147	12Mo-KO_1Way up vs WT	-1.19229	4.0871	0.888669	A0A1L1SQR4	TGPEDVDDPQHCSGSPEDTPR	1xCarbamidomethyl [C12]; 1xPhospho [S13(79.4)]	1xCarbamidomethyl [C12]; 1xPhospho [T1(0); S13(79.4); S15(10.3); T19(10.3)]	NP_796004	0.0113348	0	Dock6	dedicator of cytokinesis 6	319899	Dock6	9|9 A3	protein-coding	+2σ	15.4921	17.0626	16.9116	16.4196	17.3155	16.1859	18.1976	17.2542	18.1721	17.8349
820	565	Q91VK2_ATAPQTQHVSPMR_1xPhospho [S10(100)]_1xPhospho [T2(0); T6(0); S10(100)]	Q91VK2	Eef1d	5	5	18.2321	17.7667	17.9994	0.110798	1.38073	1.38073	12Mo-KO_1Way up vs WT	-1.0968	2.09094	0.465427	Q91VK2	ATAPQTQHVSPMR	1xPhospho [S10(100)]	1xPhospho [T2(0); T6(0); S10(100)]	NP_001272363	0.143023	0.00396376	Eef1d	eukaryotic translation elongation factor 1 delta (guanine nucleotide exchange protein)	66656	Eef1d	15|15 D3	protein-coding	+1σ	17.6958	17.8002	16.9051	18.2692	18.1631	18.3401	18.3087	18.1017	17.9274	18.4827
1937	566	F8VQ28_TGSSSPPGGLSKPGSQLDSMLGSLQSDLNK_1xPhospho [S11(97.5)]_1xPhospho [T1(0); S3(0); S4(0); S5(0.1); S11(97.5); S15(2.4); S19(0); S23(0); S26(0)]	F8VQ28	Pxn	5	5	18.7294	18.9876	18.8585	0.110874	0.836126	-1.19599	12Mo-KO_1Way down vs WT	-1.50572	1.05266	-0.258208	F8VQ28	TGSSSPPGGLSKPGSQLDSMLGSLQSDLNK	1xPhospho [S11(97.5)]	1xPhospho [T1(0); S3(0); S4(0); S5(0.1); S11(97.5); S15(2.4); S19(0); S23(0); S26(0)]	NP_598676	0.00897812	0	Pxn	paxillin	19303	Pxn	5 F|5 56.1 cM	protein-coding	-0.5σ	19.0983	18.8557	18.688	19.4504	18.8455	18.6215	18.6391	18.8771	18.6585	18.8507
1038	567	E9QP99_SSTSVVSEVSPSSETDNR_1xDeamidated [N17]; 1xPhospho [T3(95.1)]_1xDeamidated [N17]; 1xPhospho [S1(1.6); S2(1.6); T3(95.1); S4(1.6); S7(0); S10(0); S12(0); S13(0); T15(0)]	E9QP99	Golga3	5	5	16.7719	17.0415	16.9067	0.111365	0.829524	-1.20551	12Mo-KO_1Way down vs WT	-1.53386	1.05546	-0.269644	E9QP99	SSTSVVSEVSPSSETDNR	1xDeamidated [N17]; 1xPhospho [T3(95.1)]	1xDeamidated [N17]; 1xPhospho [S1(1.6); S2(1.6); T3(95.1); S4(1.6); S7(0); S10(0); S12(0); S13(0); T15(0)]	NP_001334318	0.00248538	0	Golga3	golgi autoantigen, golgin subfamily a, 3	269682	Golga3	5 F|5 53.36 cM	protein-coding	-0.5σ	16.6794	17.0677	17.2517	16.9384	17.2702	16.6624	17.1549	16.8223	16.5819	16.6377
2243	568	A6H6A9_ESDKEEPITPTSAGGPMSPQEDEAEEESDNELSSGTGDVSK_1xDeamidated [Q/N]; 1xPhospho [S18(83.3)]_1xDeamidated [Q20; N30]; 1xPhospho [S2(0); T9(0.6); T11(6.6); S12(2); S18(83.3); S28(6.6); S33(0.6); S34(0.2); T36(0); S40(0)]	A6H6A9	Rabgap1l	5	5	19.8278	19.3173	19.5725	0.111447	1.42454	1.42454	12Mo-KO_1Way up vs WT	-1.10773	2.24794	0.510496	A6H6A9	ESDKEEPITPTSAGGPMSPQEDEAEEESDNELSSGTGDVSK	1xDeamidated [Q/N]; 1xPhospho [S18(83.3)]	1xDeamidated [Q20; N30]; 1xPhospho [S2(0); T9(0.6); T11(6.6); S12(2); S18(83.3); S28(6.6); S33(0.6); S34(0.2); T36(0); S40(0)]	NP_001033710	0.00242697	0	Rabgap1l	RAB GTPase activating protein 1-like	29809	Rabgap1l	1|1 H2.1	protein-coding	+1σ	18.8854	19.3219	20.0573	18.9766	19.3455	20.5744	19.6054	19.8002	19.7329	19.4264
2407	569	O55143_VEGDTCSLNEFSITGSTYAPIGEVQK_1xCarbamidomethyl [C6]; 1xPhospho [S7(89.8)]_1xCarbamidomethyl [C6]; 1xPhospho [T5(10.2); S7(89.8); S12(0); T14(0); S16(0); T17(0); Y18(0)]	O55143	Atp2a2	5	5	20.2736	20.5182	20.3959	0.111518	0.844001	-1.18483	12Mo-KO_1Way down vs WT	-1.47446	1.05032	-0.244683	O55143	VEGDTCSLNEFSITGSTYAPIGEVQK	1xCarbamidomethyl [C6]; 1xPhospho [S7(89.8)]	1xCarbamidomethyl [C6]; 1xPhospho [T5(10.2); S7(89.8); S12(0); T14(0); S16(0); T17(0); Y18(0)]	NP_001103610	0.000279992	0	Atp2a2	ATPase, Ca++ transporting, cardiac muscle, slow twitch 2	11938	Atp2a2	5 62.38 cM|5 F	protein-coding	-0.5σ	20.9065	20.4983	20.244	20.543	20.3994	20.5074	20.325	20.2786	20.2584	19.9984
152	570	Q9WTQ5_QAQSSTEIPLQAESGQGTEEEAAKDGEENR_2xDeamidated [Q/N]; 1xPhospho [S/T]_2xDeamidated [Q1; Q3; Q11; Q16; N29]; 1xPhospho [S4(66.4); S5(16.8); T6(16.8); S14(0); T18(0)]	Q9WTQ5	Akap12	5	5	18.1271	17.0756	17.6014	0.111735	2.07266	2.07266	12Mo-KO_1Way up vs WT	-1.23569	5.30846	1.05149	Q9WTQ5	QAQSSTEIPLQAESGQGTEEEAAKDGEENR	2xDeamidated [Q/N]; 1xPhospho [S/T]	2xDeamidated [Q1; Q3; Q11; Q16; N29]; 1xPhospho [S4(66.4); S5(16.8); T6(16.8); S14(0); T18(0)]	NP_112462	0.00701066	0	Akap12	A kinase (PRKA) anchor protein (gravin) 12	83397	Akap12	10|10 A1	protein-coding	+2σ	16.8301	15.1047	16.968	18.1912	18.284	17.9081	18.1509	18.0696	18.5527	17.9542
2207	571	F8WHT3_ESGSPAQEFSK_1xPhospho [S4(89.5)]_1xPhospho [S2(0.2); S4(89.5); S10(10.3)]	F8WHT3	Prrc2b	5	5	16.8127	17.0209	16.9168	0.112152	0.865606	-1.15526	12Mo-KO_1Way down vs WT	-1.3921	1.04306	-0.208218	F8WHT3	ESGSPAQEFSK	1xPhospho [S4(89.5)]	1xPhospho [S2(0.2); S4(89.5); S10(10.3)]	NP_001153106	0.0811428	0.00180463	Prrc2b	proline-rich coiled-coil 2B	227723	Prrc2b	2|2 B	protein-coding	-0.5σ	16.8866	17.0744	17.276	16.8083	17.0593	16.8502	17.0147	16.9587	16.5904	16.6494
762	572	P39053_RSPTSSPTPQR_2xPhospho [S2(99.6); S6(86)]_2xPhospho [S2(99.6); T4(0.4); S5(1.9); S6(86); T8(12.1)]	P39053	Dnm1	5	5	15.5081	16.1318	15.82	0.112224	0.648978	-1.54089	12Mo-KO_1Way down vs WT	-2.69434	1.13478	-0.623759	P39053	RSPTSSPTPQR	2xPhospho [S2(99.6); S6(86)]	2xPhospho [S2(99.6); T4(0.4); S5(1.9); S6(86); T8(12.1)]	NP_001288666	0.0676103	0.00104129	Dnm1	dynamin 1	13429	Dnm1	2 B|2 22.09 cM	protein-coding	-2σ	15.5456	16.7083	16.018	15.9972	16.3901	15.8716	15.5738	16.3041	15.1689	14.6219
1417	573	Q9Z2D6_MPFQASPGGK_1xPhospho [S6(100)]_1xPhospho [S6(100)]	Q9Z2D6	Mecp2	5	5	16.8798	17.2547	17.0673	0.112319	0.771122	-1.29681	12Mo-KO_1Way down vs WT	-1.81471	1.07908	-0.374969	Q9Z2D6	MPFQASPGGK	1xPhospho [S6(100)]	1xPhospho [S6(100)]	NP_001075448	0.0301988	0.00049971	Mecp2	methyl CpG binding protein 2	17257	Mecp2	X A7.3|X 37.63 cM	protein-coding	-1σ	17.4684	17.3339	17.3918	17.5182	16.5613	17.1569	16.6185	16.7094	16.761	17.1531
2841	574	B2RQK7_SPSPGELQVLSPLSPLSPEPPGAPVSQALQPTSLR_1xDeamidated [Q]; 2xPhospho [S1(81.2); S11(95.1)]_1xDeamidated [Q8; Q27; Q30]; 2xPhospho [S1(81.2); S3(23.6); S11(95.1); S14(0.1); S17(0); S26(0); T32(0); S33(0)]	B2RQK7	Synpo2l	5	5	16.8528	17.2282	17.0405	0.11235	0.770894	-1.2972	12Mo-KO_1Way down vs WT	-1.81601	1.07921	-0.375396	B2RQK7	SPSPGELQVLSPLSPLSPEPPGAPVSQALQPTSLR	1xDeamidated [Q]; 2xPhospho [S1(81.2); S11(95.1)]	1xDeamidated [Q8; Q27; Q30]; 2xPhospho [S1(81.2); S3(23.6); S11(95.1); S14(0.1); S17(0); S26(0); T32(0); S33(0)]	NP_001297360	0.000173177	0	Synpo2l	synaptopodin 2-like	68760	Synpo2l	14|14 A3	protein-coding	-1σ	17.1811	17.1335	16.9781	17.8022	17.0459	16.3803	17.0075	16.8042	16.7781	17.2938
2794	575	Q6NXN1_SPPKVPIVIQDDSLPTGPPPQIR_1xPhospho [S1(100)]_1xPhospho [S1(100); S13(0); T16(0)]	Q6NXN1	Szrd1	5	5	17.5547	17.1493	17.352	0.112581	1.32446	1.32446	12Mo-KO_1Way up vs WT	-1.08611	1.90525	0.405408	Q6NXN1	SPPKVPIVIQDDSLPTGPPPQIR	1xPhospho [S1(100)]	1xPhospho [S1(100); S13(0); T16(0)]	NP_001020779	0.216536	0.00943619	Szrd1	SUZ RNA binding domain containing 1	213491	Szrd1	4 D3|4 73.38 cM	protein-coding	+1σ	17.2104	16.6303	17.0961	17.8808	16.9289	17.3555	17.8943	17.4121	17.5536	17.5579
3041	576	A2ASS6_FGCGPPVEIGPILAVDPLGPPTSPER_1xCarbamidomethyl [C3]; 1xPhospho [T/S]_1xCarbamidomethyl [C3]; 1xPhospho [T22(50); S23(50)]	A2ASS6	---	5	5	16.1068	15.1304	15.6186	0.112763	1.96749	1.96749	12Mo-KO_1Way up vs WT	-1.22073	4.72547	0.976355	A2ASS6	FGCGPPVEIGPILAVDPLGPPTSPER	1xCarbamidomethyl [C3]; 1xPhospho [T/S]	1xCarbamidomethyl [C3]; 1xPhospho [T22(50); S23(50)]	---	0.0032133	0	Ttn	titin	22138	Ttn	2 C3|2 45.13 cM	protein-coding	+2σ	15.2741	14.1719	15.5339	16.5259	14.1463	15.9877	15.3787	16.944	15.5008	16.7227
3141	577	Q00899_DIDHETVVEEQIIGENSPPDYSEYMTGK_1xPhospho [S17(100)]_1xPhospho [T6(0); S17(100); Y21(0); S22(0); Y24(0); T26(0)]	Q00899	Yy1	5	5	17.9153	17.4904	17.7029	0.113478	1.3425	1.3425	12Mo-KO_1Way up vs WT	-1.09165	1.96748	0.424918	Q00899	DIDHETVVEEQIIGENSPPDYSEYMTGK	1xPhospho [S17(100)]	1xPhospho [T6(0); S17(100); Y21(0); S22(0); Y24(0); T26(0)]	NP_033563	0.00107596	0	Yy1	YY1 transcription factor	22632	Yy1	12 F1|12 59.58 cM	protein-coding	+1σ	17.1587	18.0686	17.4772	16.9967	17.7506	18.1435	17.5599	17.8923	17.6762	18.3046
1804	578	Q02780_LKSVEDEMDSPGEEPFYTGQGR_2xPhospho [S3(100); S10(100)]_2xPhospho [S3(100); S10(100); Y17(0); T18(0)]	Q02780	Nfia	5	5	17.9813	17.4683	17.7248	0.113864	1.42705	1.42705	12Mo-KO_1Way up vs WT	-1.11233	2.26523	0.513036	Q02780	LKSVEDEMDSPGEEPFYTGQGR	2xPhospho [S3(100); S10(100)]	2xPhospho [S3(100); S10(100); Y17(0); T18(0)]	NP_001116424	0.0143784	0	Nfia	nuclear factor I/A	18027	Nfia	4 C5- C6|4 45.52 cM	protein-coding	+1σ	16.7765	17.9556	18.011	16.8097	17.7887	17.9127	17.7057	18.0437	18.1197	18.1249
2301	579	Q99P72_GSGSVDETLFALPAASEPVIPSSAEK_1xPhospho [S2(87.4)]_1xPhospho [S2(87.4); S4(12.6); T8(0.1); S16(0); S22(0); S23(0)]	Q99P72	Rtn4	5	5	18.1874	18.7346	18.461	0.114002	0.684363	-1.46121	12Mo-KO_1Way down vs WT	-2.39239	1.12048	-0.547166	Q99P72	GSGSVDETLFALPAASEPVIPSSAEK	1xPhospho [S2(87.4)]	1xPhospho [S2(87.4); S4(12.6); T8(0.1); S16(0); S22(0); S23(0)]	NP_077188	0.00133914	0	Rtn4	reticulon 4	68585	Rtn4	11|11 A3.3	protein-coding	-1σ	19.1975	18.7441	18.0931	19.5343	18.1038	18.349	17.7737	18.1617	18.2877	18.3649
1120	580	Q8C2Q7_HTGPNSPDTANDGFVR_1xPhospho [S6(100)]_1xPhospho [T2(0); S6(100); T9(0)]	Q8C2Q7	Hnrnph1	5	5	18.2284	17.3763	17.8024	0.114626	1.8051	1.8051	12Mo-KO_1Way up vs WT	-1.19567	3.89597	0.852082	Q8C2Q7	HTGPNSPDTANDGFVR	1xPhospho [S6(100)]	1xPhospho [T2(0); S6(100); T9(0)]	NP_001334416	0.000571519	0	Hnrnph1	heterogeneous nuclear ribonucleoprotein H1	59013	Hnrnph1	11|11 B1.3	protein-coding	+2σ	15.8701	17.4715	18.7009	17.3059	17.5331	17.7737	18.6453	17.9169	18.2746	18.5313
1024	581	Q2NL51_GEPNVSYICSR_1xCarbamidomethyl [C9]; 1xPhospho [S6(100)]_1xCarbamidomethyl [C9]; 1xPhospho [S6(100); Y7(0); S10(0)]	Q2NL51	Gsk3a	5	5	21.1809	21.395	21.2879	0.114729	0.862118	-1.15993	12Mo-KO_1Way down vs WT	-1.40731	1.04598	-0.214042	Q2NL51	GEPNVSYICSR	1xCarbamidomethyl [C9]; 1xPhospho [S6(100)]	1xCarbamidomethyl [C9]; 1xPhospho [S6(100); Y7(0); S10(0)]	NP_001026837	0.0273278	0.00049971	Gsk3a	glycogen synthase kinase 3 alpha	606496	Gsk3a	7|7 A3	protein-coding	-0.5σ	21.5142	21.4341	21.6594	21.1694	21.198	21.0317	21.1133	21.3418	21.3864	21.0317
1167	582	G5E8J6_SHSHEDEDGIVSSEYHR_1xPhospho [S3(90.7)]_1xPhospho [S1(9.3); S3(90.7); S12(0); S13(0); Y15(0)]	G5E8J6	Hrc	5	5	18.5118	19.0292	18.7705	0.11479	0.698635	-1.43136	12Mo-KO_1Way down vs WT	-2.2842	1.11489	-0.51739	G5E8J6	SHSHEDEDGIVSSEYHR	1xPhospho [S3(90.7)]	1xPhospho [S1(9.3); S3(90.7); S12(0); S13(0); Y15(0)]	NP_034603	0.00928211	0	Hrc	histidine rich calcium binding protein	15464	Hrc	7 B3|7 29.26 cM	protein-coding	-1σ	18.8383	18.3642	19.5602	19.621	18.7625	18.9915	18.0712	18.2529	18.5427	18.7009
2381	583	Q64012_LPAPQEDTASEAGTPQGEVQTR_2xPhospho [T8(81.3); T14(100)]_2xPhospho [T8(81.3); S10(18.7); T14(100); T21(0)]	Q64012	Raly	5	5	17.7071	18.1586	17.9328	0.114821	0.7313	-1.36743	12Mo-KO_1Way down vs WT	-2.05609	1.09959	-0.451465	Q64012	LPAPQEDTASEAGTPQGEVQTR	2xPhospho [T8(81.3); T14(100)]	2xPhospho [T8(81.3); S10(18.7); T14(100); T21(0)]	NP_001132983	0.0061364	0	Raly	hnRNP-associated with lethal yellow	19383	Raly	2 H1|2 76.83 cM	protein-coding	-1σ	17.2971	18.0507	18.3829	18.4255	18.6367	17.4809	17.4546	17.9312	17.8536	17.8154
2930	584	E9Q0S6_AASQQEIEQSIETLNMLMLDLEPASAAAPLHK_1xPhospho [S3(100)]_1xPhospho [S3(100); S10(0); T13(0); S25(0)]	E9Q0S6	Tns1	5	5	18.1757	18.5845	18.3801	0.115323	0.753215	-1.32764	12Mo-KO_1Way down vs WT	-1.92205	1.09044	-0.408866	E9Q0S6	AASQQEIEQSIETLNMLMLDLEPASAAAPLHK	1xPhospho [S3(100)]	1xPhospho [S3(100); S10(0); T13(0); S25(0)]	NP_082160	0.00019137	0	Tns1	tensin 1	21961	Tns1	1 C3|1 38.17 cM	protein-coding	-1σ	19.0633	18.0748	18.2288	19.0983	18.4576	18.4229	17.9584	18.2184	17.9616	18.3172
3149	585	Q62219_EGCPSPPGQTSK_1xCarbamidomethyl [C3]; 1xPhospho [S5(100)]_1xCarbamidomethyl [C3]; 1xPhospho [S5(100); T10(0); S11(0)]	Q62219	Tgfb1i1	5	5	18.034	18.4421	18.2381	0.116065	0.753588	-1.32699	12Mo-KO_1Way down vs WT	-1.92155	1.09124	-0.408153	Q62219	EGCPSPPGQTSK	1xCarbamidomethyl [C3]; 1xPhospho [S5(100)]	1xCarbamidomethyl [C3]; 1xPhospho [S5(100); T10(0); S11(0)]	NP_001276479	0.0283879	0.00049971	Tgfb1i1	transforming growth factor beta 1 induced transcript 1	21804	Tgfb1i1	7|7 F3	protein-coding	-1σ	18.2458	18.4002	18.4125	18.6079	18.5442	17.7609	18.4229	18.4929	18.1894	17.3037
2534	586	Q80TE4_TLSDESVCSNR_1xCarbamidomethyl [C8]; 1xPhospho [S3(100)]_1xCarbamidomethyl [C8]; 1xPhospho [T1(0); S3(100); S6(0); S9(0)]	Q80TE4	Sipa1l2	5	5	16.0689	16.4258	16.2474	0.116182	0.780799	-1.28074	12Mo-KO_1Way down vs WT	-1.77068	1.07949	-0.356977	Q80TE4	TLSDESVCSNR	1xCarbamidomethyl [C8]; 1xPhospho [S3(100)]	1xCarbamidomethyl [C8]; 1xPhospho [T1(0); S3(100); S6(0); S9(0)]	NP_001074806	0.125544	0.00337228	Sipa1l2	signal-induced proliferation-associated 1 like 2	244668	Sipa1l2	8|8 E2	protein-coding	-1σ	16.0262	16.6981	16.5517	16.4545	16.3987	16.2675	16.2452	16.284	16.1475	15.4002
1950	587	P70271_IHIDPESQDCSPATSR_1xCarbamidomethyl [C10]; 1xDeamidated [Q8]; 1xPhospho [S/T]_1xCarbamidomethyl [C10]; 1xDeamidated [Q8]; 1xPhospho [S7(0); S11(49.7); T14(49.7); S15(0.5)]	P70271	Pdlim4	5	5	18.6785	17.8204	18.2494	0.116434	1.81271	1.81271	12Mo-KO_1Way up vs WT	-1.20262	3.95172	0.858152	P70271	IHIDPESQDCSPATSR	1xCarbamidomethyl [C10]; 1xDeamidated [Q8]; 1xPhospho [S/T]	1xCarbamidomethyl [C10]; 1xDeamidated [Q8]; 1xPhospho [S7(0); S11(49.7); T14(49.7); S15(0.5)]	NP_062290	0.000143854	0	Pdlim4	PDZ and LIM domain 4	30794	Pdlim4	11 B1.3|11 32.13 cM	protein-coding	+2σ	18.0373	18.586	18.1359	16.2055	18.1372	18.4885	19.2538	17.7798	18.9936	18.8771
367	588	Q9R229_ITIFEVLESADGSEEER_1xPhospho [S13(100)]_1xPhospho [T2(0); S9(0); S13(100)]	Q9R229	Bmp10	5	5	17.9218	17.6184	17.7701	0.116876	1.23402	1.23402	12Mo-KO_1Way up vs WT	-1.06781	1.62608	0.30337	Q9R229	ITIFEVLESADGSEEER	1xPhospho [S13(100)]	1xPhospho [T2(0); S9(0); S13(100)]	NP_033886	0.000152304	0	Bmp10	bone morphogenetic protein 10	12154	Bmp10	6|6 D1	protein-coding	+1σ	17.2449	17.5118	17.5574	17.7686	18.0096	17.9169	17.4946	18.1834	18.0146	17.9996
2245	589	A6H6A9_ESDKEEPITPTSAGGPMSPQEDEAEEESDNELSSGTGDVSK_2xPhospho [S/T]_2xPhospho [S2(2.9); T9(12.9); T11(12.9); S12(12.9); S18(62); S28(66.7); S33(13.8); S34(13.8); T36(1.7); S40(0.3)]	A6H6A9	Rabgap1l	5	5	15.9665	17.0487	16.5076	0.117444	0.472282	-2.11738	12Mo-KO_1Way down vs WT	-5.67586	1.266	-1.08228	A6H6A9	ESDKEEPITPTSAGGPMSPQEDEAEEESDNELSSGTGDVSK	2xPhospho [S/T]	2xPhospho [S2(2.9); T9(12.9); T11(12.9); S12(12.9); S18(62); S28(66.7); S33(13.8); S34(13.8); T36(1.7); S40(0.3)]	NP_001033710	0.00242697	0	Rabgap1l	RAB GTPase activating protein 1-like	29809	Rabgap1l	1|1 H2.1	protein-coding	-2σ	17.2723	15.0936	17.0287	17.6579	18.1912	17.1549	15.21	15.7517	15.7965	15.9191
3325	590	P56695_LNATASLEQDKIEPPR_1xDeamidated [Q/N]; 1xPhospho [S6(98.8)]_1xDeamidated [N2; Q9]; 1xPhospho [T4(1.2); S6(98.8)]	P56695	Wfs1	5	5	18.0512	18.646	18.3486	0.11786	0.662166	-1.51019	12Mo-KO_1Way down vs WT	-2.59817	1.13921	-0.594734	P56695	LNATASLEQDKIEPPR	1xDeamidated [Q/N]; 1xPhospho [S6(98.8)]	1xDeamidated [N2; Q9]; 1xPhospho [T4(1.2); S6(98.8)]	NP_035846	0.00411508	0	Wfs1	wolframin ER transmembrane glycoprotein	22393	Wfs1	5|5 B3	protein-coding	-2σ	18.8129	17.5058	18.6975	19.1734	19.0401	17.7419	18.3046	17.6813	18.5408	17.9874
170	591	P29699_VMHTQCHSTPDSAEDVRK_1xCarbamidomethyl [C6]; 1xOxidation [M2]; 1xPhospho [S12(100)]_1xCarbamidomethyl [C6]; 1xOxidation [M2]; 1xPhospho [T4(0); S8(0); T9(0); S12(100)]	P29699	Ahsg	5	5	18.2533	17.0512	17.6522	0.117891	2.30073	2.30073	12Mo-KO_1Way up vs WT	-1.30153	6.88948	1.20209	P29699	VMHTQCHSTPDSAEDVRK	1xCarbamidomethyl [C6]; 1xOxidation [M2]; 1xPhospho [S12(100)]	1xCarbamidomethyl [C6]; 1xOxidation [M2]; 1xPhospho [T4(0); S8(0); T9(0); S12(100)]	NP_038493	0.000185103	0	Ahsg	alpha-2-HS-glycoprotein	11625	Ahsg	16 B1|16 13.74 cM	protein-coding	+3σ	17.7357	16.3161	14.8775	18.3408	17.9859	18.2038	18.1398	17.459	18.8756	18.5882
2725	592	E9QQ25_SSGPSLAGTVESRPQTPLSEASGR_1xPhospho [T16(99.2)]_1xPhospho [S1(0); S2(0); S5(0); T9(0); S12(0.4); T16(99.2); S19(0.1); S22(0.4)]	E9QQ25	Speg	5	5	18.9947	17.8371	18.4159	0.118105	2.23093	2.23093	12Mo-KO_1Way up vs WT	-1.28983	6.41954	1.15764	E9QQ25	SSGPSLAGTVESRPQTPLSEASGR	1xPhospho [T16(99.2)]	1xPhospho [S1(0); S2(0); S5(0); T9(0); S12(0.4); T16(99.2); S19(0.1); S22(0.4)]	NP_031489	0.0121154	0	Speg	SPEG complex locus	11790	Speg	1 C4|1 38.88 cM	protein-coding	+3σ	18.7536	18.7255	18.6694	15.3801	17.6567	18.7073	19.0836	18.6549	19.2286	19.2992
2135	593	Q99JB8_SPDEVTLTSIVPTR_1xPhospho [S1(100)]_1xPhospho [S1(100); T6(0); T8(0); S9(0); T13(0)]	Q99JB8	Pacsin3	5	5	16.5779	16.8521	16.715	0.118173	0.826941	-1.20928	12Mo-KO_1Way down vs WT	-1.55328	1.06218	-0.274143	Q99JB8	SPDEVTLTSIVPTR	1xPhospho [S1(100)]	1xPhospho [S1(100); T6(0); T8(0); S9(0); T13(0)]	NP_001276606	0.00582356	0	Pacsin3	protein kinase C and casein kinase substrate in neurons 3	80708	Pacsin3	2|2 E1	protein-coding	-0.5σ	17.2036	16.8878	16.6261	17.0711	16.4718	16.7922	16.6231	16.37	16.4305	16.6739
3188	594	P58771_AISEELDHALNDMTSI_1xOxidation [M13]; 1xPhospho [S15(98.9)]_1xOxidation [M13]; 1xPhospho [S3(0); T14(1.1); S15(98.9)]	P58771	Tpm1	5	5	24.629	24.9023	24.7657	0.118186	0.827433	-1.20856	12Mo-KO_1Way down vs WT	-1.55116	1.06199	-0.273285	P58771	AISEELDHALNDMTSI	1xOxidation [M13]; 1xPhospho [S15(98.9)]	1xOxidation [M13]; 1xPhospho [S3(0); T14(1.1); S15(98.9)]	NP_001157720	0.0011446	0	Tpm1	tropomyosin 1, alpha	22003	Tpm1	9 C|9 36.27 cM	protein-coding	-0.5σ	25.3553	24.8796	25.0626	24.6641	24.55	24.4837	24.6689	24.7544	24.7544	24.4837
57	595	E9Q9K8_SSSVESLSPGGDLFGLGIFK_1xPhospho [S3(81)]_1xPhospho [S1(9.4); S2(9.4); S3(81); S6(0.2); S8(0)]	E9Q9K8	Akap6	5	5	16.7101	16.8783	16.7942	0.118212	0.88996	-1.12365	12Mo-KO_1Way down vs WT	-1.31021	1.03772	-0.168187	E9Q9K8	SSSVESLSPGGDLFGLGIFK	1xPhospho [S3(81)]	1xPhospho [S1(9.4); S2(9.4); S3(81); S6(0.2); S8(0)]	NP_932779	0.00756507	0	Akap6	A kinase (PRKA) anchor protein 6	238161	Akap6	12|12 C1	protein-coding	-0.5σ	17.0304	16.6839	16.7911	17.115	16.7712	16.8381	16.6032	16.8105	16.6909	16.608
129	596	E9Q616_GDLGASSPSMK_1xPhospho [S]_1xPhospho [S6(47.4); S7(5.3); S9(47.4)]	E9Q616	Ahnak	5	5	18.1764	18.3034	18.2399	0.118367	0.915748	-1.092	12Mo-KO_1Way down vs WT	-1.22635	1.02841	-0.126977	E9Q616	GDLGASSPSMK	1xPhospho [S]	1xPhospho [S6(47.4); S7(5.3); S9(47.4)]	NP_033773	0.0541707	0.00104129	Ahnak	AHNAK nucleoprotein (desmoyokin)	66395	Ahnak	19|19 A	protein-coding	-0.5σ	18.2899	18.2288	18.2011	18.298	18.4994	18.1417	18.1627	18.3369	18.0274	18.2135
1716	597	P70670_ETPATSSEGVTAVPSEISPSPPTPASK_1xPhospho [S26(78.8)]_1xPhospho [T2(0); T5(0); S6(0); S7(0); T11(0); S15(0); S18(0); S20(10.6); T23(10.6); S26(78.8)]	P70670	Naca	5	5	21.428	21.7443	21.5861	0.118463	0.803081	-1.2452	12Mo-KO_1Way down vs WT	-1.66277	1.07239	-0.316383	P70670	ETPATSSEGVTAVPSEISPSPPTPASK	1xPhospho [S26(78.8)]	1xPhospho [T2(0); T5(0); S6(0); S7(0); T11(0); S15(0); S18(0); S20(10.6); T23(10.6); S26(78.8)]	NP_001106670	0.000924031	0	Naca	nascent polypeptide-associated complex alpha polypeptide	17938	Naca	10|10 D3	protein-coding	-1σ	22.092	21.6853	21.6164	22.092	21.2361	21.7191	21.3569	21.2167	21.4364	21.4107
2071	598	Q9D824_DHSPTPSVFNSDEER_1xPhospho [S3(99.8)]_1xPhospho [S3(99.8); T5(0); S7(0.2); S11(0)]	Q9D824	Fip1l1	5	5	18.1209	17.6641	17.8925	0.118526	1.37257	1.37257	12Mo-KO_1Way up vs WT	-1.10628	2.08417	0.456877	Q9D824	DHSPTPSVFNSDEER	1xPhospho [S3(99.8)]	1xPhospho [S3(99.8); T5(0); S7(0.2); S11(0)]	NP_001153045	0.0587025	0.00104129	Fip1l1	FIP1 like 1 (S. cerevisiae)	66899	Fip1l1	5|5 C3.3	protein-coding	+1σ	17.3816	17.0979	17.9081	17.6958	18.237	17.9333	18.2463	17.7199	18.7114	17.9937
29	599	Q60597_GHHVAQLDPLGILDADLDSSVPADIISSTDK_1xPhospho [S/T]_1xPhospho [S19(50); S20(50); S27(0.1); S28(0); T29(0)]	Q60597	Ogdh	5	5	15.9614	16.5131	16.2372	0.118976	0.682217	-1.46581	12Mo-KO_1Way down vs WT	-2.42905	1.13053	-0.551698	Q60597	GHHVAQLDPLGILDADLDSSVPADIISSTDK	1xPhospho [S/T]	1xPhospho [S19(50); S20(50); S27(0.1); S28(0); T29(0)]	NP_001239211	0.0246125	0.000280731	Ogdh	oxoglutarate (alpha-ketoglutarate) dehydrogenase (lipoamide)	18293	Ogdh	11|11 A1	protein-coding	-1σ	16.9384	17.115	15.9464	16.0975	16.4681	16.482	16.019	15.7423	15.2474	16.3161
1587	600	Q3UIZ8_DWRDETVGTTDLQQGIDPGAVSPEPGKDHAAQGPGR_1xDeamidated [Q]; 1xPhospho [S22(100)]_1xDeamidated [Q13; Q14; Q32]; 1xPhospho [T6(0); T9(0); T10(0); S22(100)]	Q3UIZ8	Mylk3	5	5	16.1827	17.2483	16.7155	0.119071	0.47778	-2.09301	12Mo-KO_1Way down vs WT	-5.55371	1.26777	-1.06558	Q3UIZ8	DWRDETVGTTDLQQGIDPGAVSPEPGKDHAAQGPGR	1xDeamidated [Q]; 1xPhospho [S22(100)]	1xDeamidated [Q13; Q14; Q32]; 1xPhospho [T6(0); T9(0); T10(0); S22(100)]	NP_001284541	0.000282669	0	Mylk3	myosin light chain kinase 3	213435	Mylk3	8|8 C3	protein-coding	-2σ	18.5655	17.1089	16.963	17.0051	16.5988	18.1894	15.7572	15.5359	15.909	15.5218
69	601	Q99KI0_VDVSPTSQR_1xPhospho [S4(100)]_1xPhospho [S4(100); T6(0); S7(0)]	Q99KI0	Aco2	5	5	18.1648	18.4336	18.2992	0.119185	0.830035	-1.20477	12Mo-KO_1Way down vs WT	-1.54111	1.06176	-0.268757	Q99KI0	VDVSPTSQR	1xPhospho [S4(100)]	1xPhospho [S4(100); T6(0); S7(0)]	NP_542364	0.0981162	0.00244569	Aco2	aconitase 2, mitochondrial	11429	Aco2	15|15 E1	protein-coding	-0.5σ	18.2674	18.537	18.3342	18.4385	18.5907	18.3331	17.6987	18.1181	18.5545	18.1197
2612	602	D3Z5J3; E9Q6A3_LSSLSDPASER_1xPhospho [S5(90.8)]_1xPhospho [S2(0); S3(0); S5(90.8); S9(9.2)]	D3Z5J3; E9Q6A3	---	5	5	17.5375	17.1258	17.3316	0.119226	1.33029	1.33029	12Mo-KO_1Way up vs WT	-1.09621	1.93993	0.411737	D3Z5J3; E9Q6A3	LSSLSDPASER	1xPhospho [S5(90.8)]	1xPhospho [S2(0); S3(0); S5(90.8); S9(9.2)]	---	0.0999395	0.00244569	Sorbs1	sorbin and SH3 domain containing 1	20411	Sorbs1	19 C3|19 34.25 cM	protein-coding	+1σ	17.4361	17.2773	16.8496	16.7887	17.2773	17.6088	18.052	17.5276	16.8335	17.6658
654	603	P56546_YPPGIVGVAPGGLPPAMEGIIPGGIPVTHNLPTVAHPSQAPSPNQPTK_1xPhospho [S/T/Y]_1xPhospho [Y1(0); T28(1.2); T33(2.4); S38(5.2); S42(64.6); T47(26.7)]	P56546	Ctbp2	5	5	16.3442	15.2656	15.8049	0.119582	2.11202	2.11202	12Mo-KO_1Way up vs WT	-1.27349	5.68053	1.07862	P56546	YPPGIVGVAPGGLPPAMEGIIPGGIPVTHNLPTVAHPSQAPSPNQPTK	1xPhospho [S/T/Y]	1xPhospho [Y1(0); T28(1.2); T33(2.4); S38(5.2); S42(64.6); T47(26.7)]	NP_001164215	0.0163489	0	Ctbp2	C-terminal binding protein 2	13017	Ctbp2	7 F3|7 76.32 cM	protein-coding	+2σ	15.6023	14.7672	14.9059	15.7614	15.2911	15.5262	17.0462	17.112	14.4433	17.5934
450	604	P61014_RASTIEMPQQAR_2xPhospho [S3(100); T4(100)]_2xPhospho [S3(100); T4(100)]	P61014	Pln	5	5	27.477	26.9274	27.2022	0.119675	1.46372	1.46372	12Mo-KO_1Way up vs WT	-1.13127	2.42373	0.549642	P61014	RASTIEMPQQAR	2xPhospho [S3(100); T4(100)]	2xPhospho [S3(100); T4(100)]	NP_001135399	0.000659186	0	Pln	phospholamban	18821	Pln	10|10 B3	protein-coding	+1σ	26.7221	27.5834	27.5834	26.0259	26.7221	27.585	27.585	27.585	27.0451	27.585
1034	605	Q91X51_KPPGATPPGTPATTSQLTAFPLGAPPPWPIPQDSSGPELGSR_1xPhospho [T6(87)]_1xPhospho [T6(87); T10(7.9); T13(2.5); T14(2.5); S15(0.1); T18(0); S34(0); S35(0); S41(0)]	Q91X51	Gorasp1	5	5	17.8533	17.3221	17.5877	0.119945	1.44514	1.44514	12Mo-KO_1Way up vs WT	-1.12707	2.35379	0.531206	Q91X51	KPPGATPPGTPATTSQLTAFPLGAPPPWPIPQDSSGPELGSR	1xPhospho [T6(87)]	1xPhospho [T6(87); T10(7.9); T13(2.5); T14(2.5); S15(0.1); T18(0); S34(0); S35(0); S41(0)]	NP_083252	0.0195881	0	Gorasp1	golgi reassembly stacking protein 1	74498	Gorasp1	9|9 F4	protein-coding	+1σ	16.9037	18.0972	17.7933	16.9526	16.8638	18.1776	17.9783	18.105	17.2924	17.7134
1112	606	P49312; Q5EBP8_SESPKEPEQLR_1xPhospho [S3(100)]_1xPhospho [S1(0); S3(100)]	P49312; Q5EBP8	---	5	5	21.6032	21.083	21.3431	0.120059	1.43411	1.43411	12Mo-KO_1Way up vs WT	-1.12446	2.31265	0.520156	P49312; Q5EBP8	SESPKEPEQLR	1xPhospho [S3(100)]	1xPhospho [S1(0); S3(100)]	---	0.0411395	0.000734311	Hnrnpa1	heterogeneous nuclear ribonucleoprotein A1	15382	Hnrnpa1	15 F3|15 58.58 cM	protein-coding	+1σ	20.1861	21.0533	20.8423	21.8752	21.458	21.4776	21.7926	21.3213	21.689	21.7354
1827	607	Q80XU3_DDSHSAEDSEDEKDDHK_2xPhospho [S5(100); S9(100)]_2xPhospho [S3(0); S5(100); S9(100)]	Q80XU3	Nucks1	5	5	17.4427	15.4349	16.4388	0.120275	4.02177	4.02177	12Mo-KO_1Way up vs WT	-1.57468	25.4699	2.00783	Q80XU3	DDSHSAEDSEDEKDDHK	2xPhospho [S5(100); S9(100)]	2xPhospho [S3(0); S5(100); S9(100)]	NP_001139276	0.00105568	0	Nucks1	nuclear casein kinase and cyclin-dependent kinase substrate 1	98415	Nucks1	1|1 E4	protein-coding	+6σ	16.5207	15.822	17.4538	11.446	15.932	15.8926	18.2038	16.7656	18.7195	17.6321
1353	608	Q9JKS4_DPALDTNGSLATPSPSPEAR_1xDeamidated [N7]; 2xPhospho [T12(100); S16(100)]_1xDeamidated [N7]; 2xPhospho [T6(0); S9(0); T12(100); S14(0); S16(100)]	Q9JKS4	Ldb3	5	5	23.1757	22.3621	22.7689	0.120621	1.75761	1.75761	12Mo-KO_1Way up vs WT	-1.20299	3.71626	0.813617	Q9JKS4	DPALDTNGSLATPSPSPEAR	1xDeamidated [N7]; 2xPhospho [T12(100); S16(100)]	1xDeamidated [N7]; 2xPhospho [T6(0); S9(0); T12(100); S14(0); S16(100)]	NP_001034160	1.33133e-08	0	Ldb3	LIM domain binding 3	24131	Ldb3	14|14 B	protein-coding	+2σ	21.7635	23.484	22.8113	21.0533	22.698	22.9177	23.0594	23.9273	22.8684	23.1056
1212	609	F6VSK8_AEIHTQPSDKER_1xPhospho [S8(99.9)]_1xPhospho [T5(0.1); S8(99.9)]	F6VSK8	---	5	5	14.7888	14.1027	14.4458	0.12076	1.60893	1.60893	12Mo-KO_1Way up vs WT	-1.16896	3.02604	0.686101	F6VSK8	AEIHTQPSDKER	1xPhospho [S8(99.9)]	1xPhospho [T5(0.1); S8(99.9)]	---	0.0621206	0.00104129	Itga6	integrin alpha 6	16403	Itga6	2 C2- C3|2 42.79 cM	protein-coding	+2σ	14.4451	13.4899	13.4424	14.9059	14.2304	14.9655	15.3911	13.7869	15.1355	14.6652
616	610	K3W4S4_TGSSPTQGIVNK_1xPhospho [S4(98.8)]_1xPhospho [T1(0.1); S3(1); S4(98.8); T6(0.1)]	K3W4S4	---	5	5	18.3343	18.5253	18.4298	0.12079	0.876047	-1.14149	12Mo-KO_1Way down vs WT	-1.36088	1.04442	-0.19092	K3W4S4	TGSSPTQGIVNK	1xPhospho [S4(98.8)]	1xPhospho [T1(0.1); S3(1); S4(98.8); T6(0.1)]	---	0.0383074	0.00049971	Mapk8ip3	mitogen-activated protein kinase 8 interacting protein 3	30957	Mapk8ip3	17 A3.3|17 12.53 cM	protein-coding	-0.5σ	18.8538	18.2736	18.497	18.5074	18.4945	18.4459	18.4977	18.2908	18.1992	18.238
2757	611	Q7TN29_DLDLLASVPSPSSVSR_1xPhospho [S15(83.7)]_1xPhospho [S7(0); S10(7.8); S12(0.8); S13(7.8); S15(83.7)]	Q7TN29	Smap2	5	5	16.5948	16.9513	16.7731	0.121365	0.781084	-1.28027	12Mo-KO_1Way down vs WT	-1.77869	1.08516	-0.35645	Q7TN29	DLDLLASVPSPSSVSR	1xPhospho [S15(83.7)]	1xPhospho [S7(0); S10(7.8); S12(0.8); S13(7.8); S15(83.7)]	NP_598477	0.00955085	0	Smap2	small ArfGAP 2	69780	Smap2	4|4 D2.2	protein-coding	-1σ	17.2903	16.7352	16.4772	17.3117	16.942	16.5307	16.7171	16.5204	16.2123	16.9936
2873	612	E9Q1U2_AQSPTPSLPASWK_1xPhospho [S3(100)]_1xPhospho [S3(100); T5(0); S7(0); S11(0)]	E9Q1U2	Synpo2	5	5	21.5094	21.7955	21.6525	0.121415	0.820122	-1.21933	12Mo-KO_1Way down vs WT	-1.58763	1.06784	-0.28609	E9Q1U2	AQSPTPSLPASWK	1xPhospho [S3(100)]	1xPhospho [S3(100); T5(0); S7(0); S11(0)]	NP_536699	0.00264393	0	Synpo2	synaptopodin 2	118449	Synpo2	3|3 G1	protein-coding	-1σ	22.0361	21.5634	21.6853	22.2986	21.394	21.5509	21.4612	21.4679	21.5439	21.5231
1395	613	A2AJI0_RKPGAGGSPALAR_1xPhospho [S8(100)]_1xPhospho [S8(100)]	A2AJI0	Map7d1	5	5	16.6131	15.9215	16.2673	0.121958	1.61501	1.61501	12Mo-KO_1Way up vs WT	-1.17322	3.06004	0.691542	A2AJI0	RKPGAGGSPALAR	1xPhospho [S8(100)]	1xPhospho [S8(100)]	NP_659190	0.155638	0.00455194	Map7d1	MAP7 domain containing 1	245877	Map7d1	4|4 D2.2	protein-coding	+2σ	15.1513	16.0238	15.9483	15.9911	16.4933	17.068	16.7367	15.331	16.6933	17.2365
843	614	Q8CB77_SPEEDQEPIISHQKPGK_1xPhospho [S1(100)]_1xPhospho [S1(100); S11(0)]	Q8CB77	Eloa	5	5	16.4229	15.8336	16.1283	0.122058	1.50451	1.50451	12Mo-KO_1Way up vs WT	-1.14602	2.59408	0.589294	Q8CB77	SPEEDQEPIISHQKPGK	1xPhospho [S1(100)]	1xPhospho [S1(100); S11(0)]	NP_038764	0.124978	0.00337228	Eloa	elongin A	27224	Eloa	4|4 D3	protein-coding	+2σ	16.4464	15.13	15.6347	16.0492	15.9078	15.8516	16.6149	15.7572	16.8796	17.0112
3276	615	A0A0R4J0D5_SYEDLTELEDR_1xPhospho [S1(100)]_1xPhospho [S1(100); Y2(0); T6(0)]	A0A0R4J0D5	Mon1a	5	5	17.5031	17.8922	17.6976	0.122662	0.763619	-1.30955	12Mo-KO_1Way down vs WT	-1.87768	1.0949	-0.389075	A0A0R4J0D5	SYEDLTELEDR	1xPhospho [S1(100)]	1xPhospho [S1(100); Y2(0); T6(0)]	NP_082645	0.0227005	0.000280731	Mon1a	MON1 homolog A, secretory traffciking associated	72825	Mon1a	9|9 F1	protein-coding	-1σ	18.2155	17.9693	17.5754	18.302	17.3988	17.0746	17.2796	17.6116	17.8004	17.7493
2604	616	A0A286YD34_SATVSPQPSHHSLSAGPDLTESEK_1xPhospho [S5(79.7)]_1xPhospho [S1(14.6); T3(2.8); S5(79.7); S9(2.8); S12(0.1); S14(0); T20(0); S22(0)]	A0A286YD34	---	5	5	18.051	17.3561	17.7035	0.123448	1.61873	1.61873	12Mo-KO_1Way up vs WT	-1.17762	3.0857	0.69486	A0A286YD34	SATVSPQPSHHSLSAGPDLTESEK	1xPhospho [S5(79.7)]	1xPhospho [S1(14.6); T3(2.8); S5(79.7); S9(2.8); S12(0.1); S14(0); T20(0); S22(0)]	---	0.044813	0.000921163	Sorbs1	sorbin and SH3 domain containing 1	20411	Sorbs1	19 C3|19 34.25 cM	protein-coding	+2σ	16.2025	17.4149	18.0026	17.4347	17.7258	18.0592	18.2301	17.1024	18.1656	18.6975
1645	617	Q02566; Q91Z83_LELQSALEEAEASLEHEEGK_1xPhospho [S13(100)]_1xPhospho [S5(0); S13(100)]	Q02566; Q91Z83	---	5	5	19.9157	19.5075	19.7116	0.123676	1.32705	1.32705	12Mo-KO_1Way up vs WT	-1.10111	1.93914	0.408228	Q02566; Q91Z83	LELQSALEEAEASLEHEEGK	1xPhospho [S13(100)]	1xPhospho [S5(0); S13(100)]	---	4.02032e-05	0	Myh6	myosin, heavy polypeptide 6, cardiac muscle, alpha	17888	Myh6	14 C3|14 28.01 cM	protein-coding	+1σ	20.1537	19.0822	19.3554	19.4798	19.4664	20.048	20.2713	19.6568	19.4373	20.1653
994	618	P23242_MGQAGSTISNSHAQPFDFPDDSQNAKK_1xDeamidated [N/Q]; 2xPhospho [S6(86.9); T/S]_1xDeamidated [Q23; N24]; 2xPhospho [S6(86.9); T7(70.4); S9(29.6); S11(13.1); S22(0.1)]	P23242	Gja1	5	5	16.7333	17.1657	16.9495	0.125065	0.741066	-1.34941	12Mo-KO_1Way down vs WT	-2.01994	1.10931	-0.432326	P23242	MGQAGSTISNSHAQPFDFPDDSQNAKK	1xDeamidated [N/Q]; 2xPhospho [S6(86.9); T/S]	1xDeamidated [Q23; N24]; 2xPhospho [S6(86.9); T7(70.4); S9(29.6); S11(13.1); S22(0.1)]	NP_034418	0.0932613	0.00244569	Gja1	gap junction protein, alpha 1	14609	Gja1	10 B4|10 28.64 cM	protein-coding	-1σ	16.896	17.048	17.9096	16.6303	17.3445	16.7227	16.4716	16.4679	16.8765	17.128
3344	619	Q9JKB3_SRPLNAVSQDGK_1xPhospho [S1(100)]_1xPhospho [S1(100); S8(0)]	Q9JKB3	Ybx3	5	5	21.1947	20.9367	21.0657	0.125848	1.19579	1.19579	12Mo-KO_1Way up vs WT	-1.06447	1.5221	0.257963	Q9JKB3	SRPLNAVSQDGK	1xPhospho [S1(100)]	1xPhospho [S1(100); S8(0)]	NP_035863	0.000200694	0	Ybx3	Y box protein 3	56449	Ybx3	6|6 F3	protein-coding	+0.5σ	20.7512	20.6701	20.8933	21.2439	21.1252	21.2393	21.2393	20.9202	21.0405	21.5343
3105	620	P70399_EAPKEECPEAMEVETSVISIDSPQK_1xCarbamidomethyl [C7]; 1xPhospho [S22(97.7)]_1xCarbamidomethyl [C7]; 1xPhospho [T15(0); S16(0); S19(2.3); S22(97.7)]	P70399	Trp53bp1	5	5	16.7197	17.2712	16.9955	0.125941	0.68234	-1.46555	12Mo-KO_1Way down vs WT	-2.45508	1.14306	-0.551438	P70399	EAPKEECPEAMEVETSVISIDSPQK	1xCarbamidomethyl [C7]; 1xPhospho [S22(97.7)]	1xCarbamidomethyl [C7]; 1xPhospho [T15(0); S16(0); S19(2.3); S22(97.7)]	NP_001277759	0.00552668	0	Trp53bp1	transformation related protein 53 binding protein 1	27223	Trp53bp1	2|2 E5	protein-coding	-1σ	17.2366	17.3918	17.2595	17.4429	17.025	15.7196	17.2495	17.5176	16.4984	16.6134
958	621	Q9DB70_NPPPQDYESDDESYEVLDLTEYAR_1xPhospho [S9(100)]_1xPhospho [Y7(0); S9(100); S13(0); Y14(0); T20(0); Y22(0)]	Q9DB70	Fundc1	5	5	20.293	20.0691	20.181	0.125969	1.16785	1.16785	12Mo-KO_1Way up vs WT	-1.0558	1.43997	0.223855	Q9DB70	NPPPQDYESDDESYEVLDLTEYAR	1xPhospho [S9(100)]	1xPhospho [Y7(0); S9(100); S13(0); Y14(0); T20(0); Y22(0)]	NP_001300674	0.00401836	0	Fundc1	FUN14 domain containing 1	72018	Fundc1	X|X A1.2	protein-coding	+0.5σ	19.8458	20.013	20.1537	20.0447	20.2884	20.1066	20.4282	20.176	20.6544	20.0997
1810	622	A0A1Y7VK55_SPFNSPSPQDSPR_1xPhospho [S7(98.9)]_1xPhospho [S1(0); S5(0.1); S7(98.9); S11(1)]	A0A1Y7VK55	---	5	5	17.1247	17.3891	17.2569	0.126068	0.832546	-1.20113	12Mo-KO_1Way down vs WT	-1.53839	1.06631	-0.264398	A0A1Y7VK55	SPFNSPSPQDSPR	1xPhospho [S7(98.9)]	1xPhospho [S1(0); S5(0.1); S7(98.9); S11(1)]	---	0.0981162	0.00244569	Nfic	nuclear factor I/C	18029	Nfic	10 C1|10 39.72 cM	protein-coding	-0.5σ	17.4936	17.2149	17.9127	17.2857	17.0383	17.1662	17.1431	17.0112	17.068	17.2347
447	623	Q3UZA1_VELGQNGEEKSPSGASHPPK_1xPhospho [S]_1xPhospho [S11(45.1); S13(45.1); S16(9.8)]	Q3UZA1	Rcsd1	5	5	15.5089	16.0921	15.8005	0.126135	0.667479	-1.49817	12Mo-KO_1Way down vs WT	-2.5863	1.15227	-0.583206	Q3UZA1	VELGQNGEEKSPSGASHPPK	1xPhospho [S]	1xPhospho [S11(45.1); S13(45.1); S16(9.8)]	NP_001033935	0.0150073	0	Rcsd1	RCSD domain containing 1	226594	Rcsd1	1|1 H2.3	protein-coding	-2σ	16.6726	15.5315	16.2412	16.0764	15.9388	15.9472	15.652	14.5066	15.3129	16.1258
2723	624	E9QQ25_RGSSAESALPR_1xPhospho [S4(93.5)]_1xPhospho [S3(6.5); S4(93.5); S7(0)]	E9QQ25	Speg	5	5	19.688	18.4063	19.0471	0.126707	2.43121	2.43121	12Mo-KO_1Way up vs WT	-1.36831	8.08776	1.28167	E9QQ25	RGSSAESALPR	1xPhospho [S4(93.5)]	1xPhospho [S3(6.5); S4(93.5); S7(0)]	NP_031489	0.0109636	0	Speg	SPEG complex locus	11790	Speg	1 C4|1 38.88 cM	protein-coding	+3σ	18.219	18.8487	15.7462	20.1904	19.0273	19.6634	19.9674	19.1921	19.6085	20.0084
789	625	Q69ZR2_SSSDNNTNTLGR_1xPhospho [S3(97.6)]_1xPhospho [S1(1.7); S2(0.3); S3(97.6); T7(0.3); T9(0.3)]	Q69ZR2	---	5	5	15.6909	16.3008	15.9959	0.126956	0.655244	-1.52615	12Mo-KO_1Way down vs WT	-2.70513	1.16143	-0.609897	Q69ZR2	SSSDNNTNTLGR	1xPhospho [S3(97.6)]	1xPhospho [S1(1.7); S2(0.3); S3(97.6); T7(0.3); T9(0.3)]	---	0.0340124	0.00049971	Hectd1	HECT domain E3 ubiquitin protein ligase 1	207304	Hectd1	12 B3|12 22.11 cM	protein-coding	-2σ	16.3804	16.48	15.1216	16.8606	16.6615	16.2918	15.6318	15.9018	15.3042	15.3251
1455	626	P14873_TPGDFNYAYQKPENAAGSPDEEDYDYESQEK_1xDeamidated [Q/N]; 1xPhospho [S18(90.2)]_1xDeamidated [Q10; N14; Q29]; 1xPhospho [T1(9.1); Y7(0.2); Y9(0.4); S18(90.2); Y24(0); Y26(0); S28(0)]	P14873	Map1b	5	5	16.9905	17.6854	17.3379	0.128071	0.617734	-1.61882	12Mo-KO_1Way down vs WT	-3.11471	1.18856	-0.694942	P14873	TPGDFNYAYQKPENAAGSPDEEDYDYESQEK	1xDeamidated [Q/N]; 1xPhospho [S18(90.2)]	1xDeamidated [Q10; N14; Q29]; 1xPhospho [T1(9.1); Y7(0.2); Y9(0.4); S18(90.2); Y24(0); Y26(0); S28(0)]	NP_032660	0.00476893	0	Map1b	microtubule-associated protein 1B	17755	Map1b	13 D1|13 52.9 cM	protein-coding	-2σ	16.689	17.4871	18.9627	17.9033	17.3851	16.9786	16.7546	16.5189	17.265	17.4354
43	627	Q8BRK8_MPPLIADSPK_1xPhospho [S8(100)]_1xPhospho [S8(100)]	Q8BRK8	Prkaa2	5	5	16.5889	17.325	16.9569	0.128816	0.600345	-1.66571	12Mo-KO_1Way down vs WT	-3.33694	1.20268	-0.736136	Q8BRK8	MPPLIADSPK	1xPhospho [S8(100)]	1xPhospho [S8(100)]	NP_835279	0.0287959	0.00049971	Prkaa2	protein kinase, AMP-activated, alpha 2 catalytic subunit	108079	Prkaa2	4|4 C6	protein-coding	-2σ	17.388	16.6819	17.2723	17.6717	17.6111	16.0352	15.5131	17.8087	17.0396	16.5477
2765	628	Q8BJS4_YSQDDNDGGSSSSGASSVAGSQGTVFK_1xPhospho [S2(83.8)]_1xPhospho [Y1(3.1); S2(83.8); S10(3.1); S11(3.1); S12(3.1); S13(3.1); S16(0.7); S17(0); S21(0); T24(0)]	Q8BJS4	Sun2	5	5	17.0733	16.6886	16.8809	0.12918	1.30558	1.30558	12Mo-KO_1Way up vs WT	-1.10169	1.87788	0.384695	Q8BJS4	YSQDDNDGGSSSSGASSVAGSQGTVFK	1xPhospho [S2(83.8)]	1xPhospho [Y1(3.1); S2(83.8); S10(3.1); S11(3.1); S12(3.1); S13(3.1); S16(0.7); S17(0); S21(0); T24(0)]	NP_001192274	0.00529506	0	Sun2	Sad1 and UNC84 domain containing 2	223697	Sun2	15|15 E1	protein-coding	+1σ	16.6097	16.696	16.7378	16.0347	17.3645	17.3336	17.2021	16.9215	17.0075	16.9017
247	629	Q9Z1T1_NFYESEEEEEEKEK_1xPhospho [S5(100)]_1xPhospho [Y3(0); S5(100)]	Q9Z1T1	Ap3b1	5	5	19.5605	19.1535	19.357	0.129227	1.32596	1.32596	12Mo-KO_1Way up vs WT	-1.10796	1.94797	0.407032	Q9Z1T1	NFYESEEEEEEKEK	1xPhospho [S5(100)]	1xPhospho [Y3(0); S5(100)]	NP_033810	0.0386735	0.00049971	Ap3b1	adaptor-related protein complex 3, beta 1 subunit	11774	Ap3b1	13 C3|13 49.22 cM	protein-coding	+1σ	19.3633	18.3481	19.5509	19.4524	19.0527	19.8288	19.4742	19.5178	19.2489	19.7329
2451	630	Q52KI8_RASPSPPPKR_2xPhospho [S3(100); S5(100)]_2xPhospho [S3(100); S5(100)]	Q52KI8	Srrm1	5	5	15.8622	14.7432	15.3027	0.129458	2.1719	2.1719	12Mo-KO_1Way up vs WT	-1.32655	6.25756	1.11896	Q52KI8	RASPSPPPKR	2xPhospho [S3(100); S5(100)]	2xPhospho [S3(100); S5(100)]	NP_058079	0.0549449	0.00104129	Srrm1	serine/arginine repetitive matrix 1	51796	Srrm1	4|4 D3	protein-coding	+2σ	13.6073	16.6615	15.2544	13.1789	15.0139	15.8803	15.9399	16.6253	15.6003	15.2651
1036	631	Q91X51_GGEATWSGSEFEISFPDSPGAQAQADHLPR_1xPhospho [T/S]_1xPhospho [T5(25); S7(25); S9(25); S14(25); S18(0.1)]	Q91X51	Gorasp1	5	5	16.2249	16.7377	16.4813	0.129666	0.700861	-1.42682	12Mo-KO_1Way down vs WT	-2.31799	1.13861	-0.512799	Q91X51	GGEATWSGSEFEISFPDSPGAQAQADHLPR	1xPhospho [T/S]	1xPhospho [T5(25); S7(25); S9(25); S14(25); S18(0.1)]	NP_083252	0.140488	0.00396376	Gorasp1	golgi reassembly stacking protein 1	74498	Gorasp1	9|9 F4	protein-coding	-1σ	17.4303	16.6431	16.4214	16.7744	16.4196	15.8234	16.3657	15.5173	16.6851	16.7333
2729	632	E9QQ25_SEGGAAWGTPEASQEELRSPR_1xPhospho [S/T]_1xPhospho [S1(0); T9(0); S13(50); S19(50)]	E9QQ25	Speg	5	5	15.7172	16.2487	15.983	0.129949	0.691821	-1.44546	12Mo-KO_1Way down vs WT	-2.39129	1.14451	-0.531529	E9QQ25	SEGGAAWGTPEASQEELRSPR	1xPhospho [S/T]	1xPhospho [S1(0); T9(0); S13(50); S19(50)]	NP_031489	0.0465478	0.000921163	Speg	SPEG complex locus	11790	Speg	1 C4|1 38.88 cM	protein-coding	-1σ	16.718	15.8376	15.7065	16.8866	16.0948	16.0771	15.4258	15.7379	15.1019	16.2431
3261	633	E9PUR2_SPASDVQQETGADPEVRLSPAEEAHQR_1xPhospho [S19(100)]_1xPhospho [S1(0); S4(0); T10(0); S19(100)]	E9PUR2	---	5	5	16.0483	17.0614	16.5548	0.1302	0.495459	-2.01833	12Mo-KO_1Way down vs WT	-5.27276	1.29435	-1.01316	E9PUR2	SPASDVQQETGADPEVRLSPAEEAHQR	1xPhospho [S19(100)]	1xPhospho [S1(0); S4(0); T10(0); S19(100)]	---	0.0207388	0.000280731	Myo18a	myosin XVIIIA	360013	Myo18a	11|11 B5	protein-coding	-2σ	17.8042	16.7558	18.7421	15.8195	16.1857	16.4543	16.4195	15.0121	16.0556	16.3
2200	634	Q60953_VPAPPGSPCR_1xCarbamidomethyl [C9]; 1xPhospho [S7(100)]_1xCarbamidomethyl [C9]; 1xPhospho [S7(100)]	Q60953	Pml	5	5	17.9934	18.2595	18.1264	0.131144	0.831524	-1.20261	12Mo-KO_1Way down vs WT	-1.54881	1.0709	-0.26617	Q60953	VPAPPGSPCR	1xCarbamidomethyl [C9]; 1xPhospho [S7(100)]	1xCarbamidomethyl [C9]; 1xPhospho [S7(100)]	NP_001298017	0.0541707	0.00104129	Pml	promyelocytic leukemia	18854	Pml	9 B|9 31.63 cM	protein-coding	-0.5σ	18.5542	18.0989	18.1082	18.546	17.9905	18.094	18.0794	18.1813	18.0159	17.5962
1472	635	P27546; A0A0G2JFH2_NTTPTGAAPPAGMTSTR_1xPhospho [T3(99.5)]_1xPhospho [T2(0.5); T3(99.5); T5(0); T14(0); S15(0); T16(0)]	P27546; A0A0G2JFH2	---	5	5	18.4249	18.184	18.3044	0.131284	1.1818	1.1818	12Mo-KO_1Way up vs WT	-1.06408	1.48615	0.240985	P27546; A0A0G2JFH2	NTTPTGAAPPAGMTSTR	1xPhospho [T3(99.5)]	1xPhospho [T2(0.5); T3(99.5); T5(0); T14(0); S15(0); T16(0)]	---	0.00341829	0	Map4	microtubule-associated protein 4	17758	Map4	9 F2|9 59.83 cM	protein-coding	+0.5σ	18.5243	18.0079	17.9923	17.9808	18.4144	18.4687	18.5945	18.4998	18.1145	18.4472
306	636	E9Q236_ENEEAEPSTAPGTPTLR_1xPhospho [T13(99.2)]_1xPhospho [S8(0); T9(0); T13(99.2); T15(0.8)]	E9Q236	Abcc4	5	5	17.9804	18.3637	18.172	0.13129	0.766695	-1.3043	12Mo-KO_1Way down vs WT	-1.87786	1.10384	-0.383276	E9Q236	ENEEAEPSTAPGTPTLR	1xPhospho [T13(99.2)]	1xPhospho [S8(0); T9(0); T13(99.2); T15(0.8)]	NP_001028508	0.00154456	0	Abcc4	ATP-binding cassette, sub-family C (CFTR/MRP), member 4	239273	Abcc4	14|14 E4	protein-coding	-1σ	18.6897	18.4787	18.512	18.1765	17.9618	18.2702	17.8105	18.4518	17.375	17.9948
1556	637	Q62234_EVSTVSESVQEPLSSPPQEAAPEEEQSQSEPPKK_1xDeamidated [Q]; 1xPhospho [S3(79.4)]_1xDeamidated [Q10; Q18; Q26; Q28]; 1xPhospho [S3(79.4); T4(17.5); S6(1); S8(1); S14(0.2); S15(1); S27(0); S29(0)]	Q62234	Myom1	5	5	18.9268	18.5908	18.7588	0.131539	1.26225	1.26225	12Mo-KO_1Way up vs WT	-1.09073	1.73782	0.335993	Q62234	EVSTVSESVQEPLSSPPQEAAPEEEQSQSEPPKK	1xDeamidated [Q]; 1xPhospho [S3(79.4)]	1xDeamidated [Q10; Q18; Q26; Q28]; 1xPhospho [S3(79.4); T4(17.5); S6(1); S8(1); S14(0.2); S15(1); S27(0); S29(0)]	NP_001077403	0.0570625	0.00104129	Myom1	myomesin 1	17929	Myom1	17|17 E1.3	protein-coding	+1σ	19.0209	18.5032	18.4838	18.4747	18.4715	19.1107	18.962	19.4232	18.6936	18.4445
267	638	Q9JIX8_SQSPSPPPLPEDLEK_2xPhospho [S3(98.6); S5(100)]_2xPhospho [S1(1.4); S3(98.6); S5(100)]	Q9JIX8	Acin1	5	5	17.2522	16.7323	16.9922	0.131563	1.43381	1.43381	12Mo-KO_1Way up vs WT	-1.14386	2.35157	0.519858	Q9JIX8	SQSPSPPPLPEDLEK	2xPhospho [S3(98.6); S5(100)]	2xPhospho [S1(1.4); S3(98.6); S5(100)]	NP_001078942	0.0120579	0	Acin1	apoptotic chromatin condensation inducer 1	56215	Acin1	14|14 C2	protein-coding	+1σ	17.4485	16.5727	16.1204	16.1875	17.3326	16.8871	17.112	17.3576	17.6782	17.2262
3066	639	A2ASS6_KTPSPIEAER_1xPhospho [S4(100)]_1xPhospho [T2(0); S4(100)]	A2ASS6	---	5	5	23.9344	23.4162	23.6753	0.131838	1.43217	1.43217	12Mo-KO_1Way up vs WT	-1.14384	2.34615	0.518206	A2ASS6	KTPSPIEAER	1xPhospho [S4(100)]	1xPhospho [T2(0); S4(100)]	---	0.0213392	0.000280731	Ttn	titin	22138	Ttn	2 C3|2 45.13 cM	protein-coding	+1σ	22.7637	23.3875	22.7851	24.2215	23.9232	24.225	23.995	23.995	23.7285	23.7285
3097	640	A2ASS6_QQSPSPIR_1xPhospho [S3(100)]_1xPhospho [S3(100); S5(0)]	A2ASS6	---	5	5	20.4165	20.7262	20.5713	0.131886	0.806819	-1.23944	12Mo-KO_1Way down vs WT	-1.66474	1.08367	-0.309684	A2ASS6	QQSPSPIR	1xPhospho [S3(100)]	1xPhospho [S3(100); S5(0)]	---	0.134327	0.00368888	Ttn	titin	22138	Ttn	2 C3|2 45.13 cM	protein-coding	-1σ	20.6701	20.5969	20.4664	21.0996	20.7978	20.8898	20.3404	20.6148	20.0806	20.1568
28	641	Q9CQX8_GSTSPDLLMHQGPPDTAEIIK_1xPhospho [S4(80.8)]_1xPhospho [S2(3.3); T3(15.9); S4(80.8); T16(0)]	Q9CQX8	Mrps36	5	5	17.8897	18.2107	18.0502	0.132023	0.800481	-1.24925	12Mo-KO_1Way down vs WT	-1.69641	1.08701	-0.32106	Q9CQX8	GSTSPDLLMHQGPPDTAEIIK	1xPhospho [S4(80.8)]	1xPhospho [S2(3.3); T3(15.9); S4(80.8); T16(0)]	NP_079645	0.0332129	0.00049971	Mrps36	mitochondrial ribosomal protein S36	66128	Mrps36	13|13 D1	protein-coding	-1σ	18.7758	18.2794	18.0096	17.8465	18.1424	17.9312	17.9903	18.2038	17.5705	17.7527
597	642	Q6A065_HDDGTQSDSENAGAHR_1xPhospho [S7(99.6)]_1xPhospho [T5(0.2); S7(99.6); S9(0.2)]	Q6A065	---	5	5	13.5327	14.286	13.9093	0.13291	0.593249	-1.68563	12Mo-KO_1Way down vs WT	-3.46232	1.21854	-0.753291	Q6A065	HDDGTQSDSENAGAHR	1xPhospho [S7(99.6)]	1xPhospho [T5(0.2); S7(99.6); S9(0.2)]	---	0.0338509	0.00049971	Cep170	centrosomal protein 170	545389	Cep170	1|1 H4	protein-coding	-2σ	13.7133	14.5304	14.5304	14.2507	14.4052	14.1441	13.6439	13.6439	11.9228	14.3089
1533	643	Q99KX1_LAIQGPEDSPSR_1xPhospho [S11(92.5)]_1xPhospho [S9(7.5); S11(92.5)]	Q99KX1	Mlf2	5	5	16.7469	16.9905	16.8687	0.133948	0.844636	-1.18394	12Mo-KO_1Way down vs WT	-1.49532	1.06677	-0.243599	Q99KX1	LAIQGPEDSPSR	1xPhospho [S11(92.5)]	1xPhospho [S9(7.5); S11(92.5)]	NP_001163812	0.0819021	0.00180463	Mlf2	myeloid leukemia factor 2	30853	Mlf2	6|6 F2	protein-coding	-0.5σ	17.2482	17.0531	17.2607	16.8195	16.571	16.7318	16.5708	16.7674	16.7057	16.9587
976	644	P23242_MGQAGSTISNSHAQPFDFPDDSQNAK_1xPhospho [S9(84.2)]_1xPhospho [S6(1.8); T7(1.8); S9(84.2); S11(12.1); S22(0)]	P23242	Gja1	5	5	22.3992	22.6714	22.5353	0.133996	0.828075	-1.20762	12Mo-KO_1Way down vs WT	-1.56762	1.07493	-0.272167	P23242	MGQAGSTISNSHAQPFDFPDDSQNAK	1xPhospho [S9(84.2)]	1xPhospho [S6(1.8); T7(1.8); S9(84.2); S11(12.1); S22(0)]	NP_034418	0.000266985	0	Gja1	gap junction protein, alpha 1	14609	Gja1	10 B4|10 28.64 cM	protein-coding	-0.5σ	23.0007	22.5371	23.0274	22.5681	22.2238	22.2042	22.3536	22.5568	22.4288	22.4528
59	645	E9Q9K8_STPSLVEPPDR_1xPhospho [S/T]_1xPhospho [S1(50); T2(50); S4(0.1)]	E9Q9K8	Akap6	5	5	17.8494	18.0823	17.9658	0.13427	0.850903	-1.17522	12Mo-KO_1Way down vs WT	-1.46952	1.06399	-0.232934	E9Q9K8	STPSLVEPPDR	1xPhospho [S/T]	1xPhospho [S1(50); T2(50); S4(0.1)]	NP_932779	0.0306328	0.00049971	Akap6	A kinase (PRKA) anchor protein 6	238161	Akap6	12|12 C1	protein-coding	-0.5σ	17.7258	18.0148	18.2777	18.2713	18.1218	18.111	17.8279	17.6126	18.0191	17.6762
651	646	P07310_GQSIDDMIPAQK_1xOxidation [M7]; 1xPhospho [S3(100)]_1xOxidation [M7]; 1xPhospho [S3(100)]	P07310	Ckm	5	5	16.9195	17.4582	17.1888	0.134324	0.688383	-1.45268	12Mo-KO_1Way down vs WT	-2.43596	1.15433	-0.538716	P07310	GQSIDDMIPAQK	1xOxidation [M7]; 1xPhospho [S3(100)]	1xOxidation [M7]; 1xPhospho [S3(100)]	NP_031736	0.000924031	0	Ckm	creatine kinase, muscle	12715	Ckm	7 A3|7 9.67 cM	protein-coding	-1σ	17.4248	17.5996	17.995	17.3486	16.923	16.0912	17.0893	17.3086	17.5934	16.5148
2429	647	Q8BUH8_RASSEIVTEGK_1xPhospho [S3(99.9)]_1xPhospho [S3(99.9); S4(0.1); T8(0)]	Q8BUH8	Senp7	5	5	16.8902	16.5349	16.7126	0.134521	1.2792	1.2792	12Mo-KO_1Way up vs WT	-1.09948	1.79915	0.355246	Q8BUH8	RASSEIVTEGK	1xPhospho [S3(99.9)]	1xPhospho [S3(99.9); S4(0.1); T8(0)]	NP_079759	0.15155	0.00441508	Senp7	SUMO1/sentrin specific peptidase 7	66315	Senp7	16|16 C1.1	protein-coding	+1σ	16.8496	16.4583	15.7673	16.8655	16.7339	16.6809	16.8483	16.9836	16.9912	16.9468
1512	648	P53986_LKSKESLQEAGK_1xPhospho [S3(100)]_1xPhospho [S3(100); S6(0.1)]	P53986	Slc16a1	5	5	18.2696	16.9889	17.6292	0.134735	2.42958	2.42958	12Mo-KO_1Way up vs WT	-1.40874	8.31559	1.28071	P53986	LKSKESLQEAGK	1xPhospho [S3(100)]	1xPhospho [S3(100); S6(0.1)]	NP_033222	0.000893769	0	Slc16a1	solute carrier family 16 (monocarboxylic acid transporters), member 1	20501	Slc16a1	3|3 F2.2	protein-coding	+3σ	17.1089	17.119	14.2507	18.3378	18.1282	18.5408	18.5783	17.5086	17.891	18.8294
1352	649	Q9JKS4_DPALDTNGSLATPSPSPEAR_1xPhospho [S16(100)]_1xPhospho [T6(0); S9(0); T12(0); S14(0); S16(100)]	Q9JKS4	Ldb3	5	5	21.2788	21.6461	21.4625	0.134988	0.775214	-1.28997	12Mo-KO_1Way down vs WT	-1.83636	1.10358	-0.367333	Q9JKS4	DPALDTNGSLATPSPSPEAR	1xPhospho [S16(100)]	1xPhospho [T6(0); S9(0); T12(0); S14(0); S16(100)]	NP_001034160	1.33133e-08	0	Ldb3	LIM domain binding 3	24131	Ldb3	14|14 B	protein-coding	-1σ	21.896	21.3472	21.9717	20.9915	22.0242	21.4858	21.1835	21.2862	21.4292	21.0094
132	650	E9Q616_SNSFSDER_1xPhospho [S3(100)]_1xPhospho [S1(0); S3(100); S5(0)]	E9Q616	Ahnak	5	5	19.3716	19.6415	19.5066	0.135144	0.82938	-1.20572	12Mo-KO_1Way down vs WT	-1.56313	1.07523	-0.269895	E9Q616	SNSFSDER	1xPhospho [S3(100)]	1xPhospho [S1(0); S3(100); S5(0)]	NP_033773	0.0792738	0.00161377	Ahnak	AHNAK nucleoprotein (desmoyokin)	66395	Ahnak	19|19 A	protein-coding	-0.5σ	19.4798	19.8065	19.1079	19.9435	19.8698	19.451	19.3565	19.4352	19.1905	19.4248
1086	651	P11499_IEDVGSDEEDDSGKDK_1xPhospho [S6(100)]_1xPhospho [S6(100); S12(0)]	P11499	Hsp90ab1	5	5	25.7907	25.3584	25.5745	0.135933	1.34943	1.34943	12Mo-KO_1Way up vs WT	-1.1243	2.0473	0.432347	P11499	IEDVGSDEEDDSGKDK	1xPhospho [S6(100)]	1xPhospho [S6(100); S12(0)]	NP_032328	0.000204549	0	Hsp90ab1	heat shock protein 90 alpha (cytosolic), class B member 1	15516	Hsp90ab1	17 B3|17 22.59 cM	protein-coding	+1σ	24.6641	25.7712	25.3553	24.9755	26.0259	25.6329	25.8871	25.7731	26.0276	25.6329
2326	652	E9PUF7_SRSDVDMDPGSATAVLGPTR_1xPhospho [S3(89.3)]_1xPhospho [S1(10.7); S3(89.3); S11(0); T13(0); T19(0)]	E9PUF7	Arhgef1	5	5	15.8241	15.49	15.657	0.136066	1.26056	1.26056	12Mo-KO_1Way up vs WT	-1.09489	1.7398	0.334069	E9PUF7	SRSDVDMDPGSATAVLGPTR	1xPhospho [S3(89.3)]	1xPhospho [S1(10.7); S3(89.3); S11(0); T13(0); T19(0)]	NP_001123623	0.0140404	0	Arhgef1	Rho guanine nucleotide exchange factor (GEF) 1	16801	Arhgef1	7|7 A3	protein-coding	+1σ	16.0583	15.5098	15.3054	15.267	15.3097	15.7346	15.6906	15.4697	15.9472	16.2785
3165	653	Q8CIB6_LASTDDGYIDLQFK_1xPhospho [T4(99.9)]_1xPhospho [S3(0.1); T4(99.9); Y8(0)]	Q8CIB6	Tmem230	5	5	17.7103	17.4749	17.5926	0.13608	1.17728	1.17728	12Mo-KO_1Way up vs WT	-1.06599	1.47744	0.235452	Q8CIB6	LASTDDGYIDLQFK	1xPhospho [T4(99.9)]	1xPhospho [S3(0.1); T4(99.9); Y8(0)]	NP_001135443	0.00355088	0	Tmem230	transmembrane protein 230	70612	Tmem230	2|2 F2	protein-coding	+0.5σ	17.4347	17.4784	17.0762	17.8061	17.579	17.7493	17.6374	17.653	17.5233	17.9887
2818	654	B2RQK7_SPSPTPSLPPSWK_1xPhospho [S1(99.5)]_1xPhospho [S1(99.5); S3(0.5); T5(0); S7(0); S11(0)]	B2RQK7	Synpo2l	5	5	20.6989	20.98	20.8394	0.136193	0.822997	-1.21507	12Mo-KO_1Way down vs WT	-1.59356	1.07936	-0.281042	B2RQK7	SPSPTPSLPPSWK	1xPhospho [S1(99.5)]	1xPhospho [S1(99.5); S3(0.5); T5(0); S7(0); S11(0)]	NP_001297360	0.000413571	0	Synpo2l	synaptopodin 2-like	68760	Synpo2l	14|14 A3	protein-coding	-1σ	21.3639	20.8997	20.925	20.941	20.7703	20.6338	20.8064	20.2517	20.7071	21.0957
1805	655	P97863_TISIDENMEPSPTGDFYPSPNSPAAGSR_1xPhospho [S22(84)]_1xPhospho [T1(0); S3(0); S11(0); T13(0); Y17(0); S19(0); S22(84); S27(16)]	P97863	Nfib	5	5	18.262	18.8142	18.5381	0.136788	0.681971	-1.46634	12Mo-KO_1Way down vs WT	-2.50058	1.16298	-0.552218	P97863	TISIDENMEPSPTGDFYPSPNSPAAGSR	1xPhospho [S22(84)]	1xPhospho [T1(0); S3(0); S11(0); T13(0); Y17(0); S19(0); S22(84); S27(16)]	NP_001106680	0.00233634	0	Nfib	nuclear factor I/B	18028	Nfib	4 C3|4 38.4 cM	protein-coding	-1σ	19.1605	19.2792	18.4682	18.6056	18.5577	18.4057	18.481	18.9276	17.1889	18.3068
538	656	Q63918_LEDQMQEDREEGSFTEGLSEASLPSGLMEGSAEDAEK_1xDeamidated [Q]; 1xPhospho [S13(85)]_1xDeamidated [Q4; Q6]; 1xPhospho [S13(85); T15(14.9); S19(0); S22(0); S25(0); S31(0)]	Q63918	Cavin2	5	5	20.2211	19.2168	19.7189	0.136945	2.00596	2.00596	12Mo-KO_1Way up vs WT	-1.31658	5.29779	1.0043	Q63918	LEDQMQEDREEGSFTEGLSEASLPSGLMEGSAEDAEK	1xDeamidated [Q]; 1xPhospho [S13(85)]	1xDeamidated [Q4; Q6]; 1xPhospho [S13(85); T15(14.9); S19(0); S22(0); S25(0); S31(0)]	NP_620080	1.85148e-05	0	Cavin2	caveolae associated 2	20324	Cavin2	1|1 C1.1	protein-coding	+2σ	19.9601	19.4276	17.67	19.3142	19.7122	19.4642	19.5648	19.9087	21.9638	20.2039
896	657	Q05D44_TARPNSEAPLSGSEDADDSNK_1xPhospho [S11(99.9)]_1xPhospho [T1(0); S6(0); S11(99.9); S13(0.1); S19(0)]	Q05D44	Eif5b	5	5	19.4236	18.8648	19.1442	0.137026	1.47303	1.47303	12Mo-KO_1Way up vs WT	-1.16551	2.52895	0.558788	Q05D44	TARPNSEAPLSGSEDADDSNK	1xPhospho [S11(99.9)]	1xPhospho [T1(0); S6(0); S11(99.9); S13(0.1); S19(0)]	NP_938045	3.77923e-05	0	Eif5b	eukaryotic translation initiation factor 5B	226982	Eif5b	1|1 B	protein-coding	+1σ	17.8702	19.4524	18.3624	19.0633	19.5758	19.2105	19.686	19.3203	19.5701	19.3311
1519	658	Q9ERZ4_EPVANQDPVSPSLVQGR_1xPhospho [S10(99.4)]_1xPhospho [S10(99.4); S12(0.7)]	Q9ERZ4	Chrm2	5	5	18.5453	18.9916	18.7685	0.137487	0.733926	-1.36253	12Mo-KO_1Way down vs WT	-2.0993	1.13078	-0.446293	Q9ERZ4	EPVANQDPVSPSLVQGR	1xPhospho [S10(99.4)]	1xPhospho [S10(99.4); S12(0.7)]	NP_987076	0.000254582	0	Chrm2	cholinergic receptor, muscarinic 2, cardiac	243764	Chrm2	6|6 B1	protein-coding	-1σ	19.0657	18.9072	18.6936	18.9281	19.3633	19.003	17.8965	19.2217	18.384	18.2212
333	659	E9PZ16_GSLGTSGETCR_1xCarbamidomethyl [C10]; 1xPhospho [S6(91.8)]_1xCarbamidomethyl [C10]; 1xPhospho [S2(0); T5(0); S6(91.8); T9(8.2)]	E9PZ16	Hspg2	5	5	17.7015	17.9125	17.807	0.137928	0.863927	-1.15751	12Mo-KO_1Way down vs WT	-1.42036	1.06012	-0.211019	E9PZ16	GSLGTSGETCR	1xCarbamidomethyl [C10]; 1xPhospho [S6(91.8)]	1xCarbamidomethyl [C10]; 1xPhospho [S2(0); T5(0); S6(91.8); T9(8.2)]	NP_032331	0.0941269	0.00244569	Hspg2	perlecan (heparan sulfate proteoglycan 2)	15530	Hspg2	4 D3|4 69.93 cM	protein-coding	-0.5σ	17.8786	18.1099	17.7506	17.8886	17.9349	17.7963	17.9487	17.6016	17.8552	17.3056
945	660	Q61584_RGPNYTSGYGTNSELSNPSETESER_1xPhospho [S19(98.3)]_1xPhospho [Y5(0); T6(0); S7(0); Y9(0); T11(0); S13(0); S16(0); S19(98.3); T21(1.6); S23(0)]	Q61584	Fxr1	5	5	18.6828	18.2622	18.4725	0.137935	1.33854	1.33854	12Mo-KO_1Way up vs WT	-1.12343	2.01283	0.420659	Q61584	RGPNYTSGYGTNSELSNPSETESER	1xPhospho [S19(98.3)]	1xPhospho [Y5(0); T6(0); S7(0); Y9(0); T11(0); S13(0); S16(0); S19(98.3); T21(1.6); S23(0)]	NP_001106659	0.00403752	0	Fxr1	fragile X mental retardation gene 1, autosomal homolog	14359	Fxr1	3|3 A3	protein-coding	+1σ	18.302	17.829	19.0553	17.7195	18.4051	18.4663	18.7037	18.4792	18.8583	18.9067
830	661	E9QP49_RSSVNGEAGPVPPPR_1xDeamidated [N5]; 1xPhospho [S3(98.9)]_1xDeamidated [N5]; 1xPhospho [S2(1.1); S3(98.9)]	E9QP49	Ehbp1l1	5	5	17.0553	16.5915	16.8234	0.138321	1.37925	1.37925	12Mo-KO_1Way up vs WT	-1.13752	2.16393	0.463883	E9QP49	RSSVNGEAGPVPPPR	1xDeamidated [N5]; 1xPhospho [S3(98.9)]	1xDeamidated [N5]; 1xPhospho [S2(1.1); S3(98.9)]	NP_001108069	0.1189	0.00324389	Ehbp1l1	EH domain binding protein 1-like 1	114601	Ehbp1l1	19|19 A	protein-coding	+1σ	16.4933	16.7498	17.0593	16.0289	16.6261	17.2184	17.587	16.3833	16.6866	17.4015
1955	662	P97467_GKGSSGLNLGNFFASR_1xPhospho [S5(98.9)]_1xPhospho [S4(1.1); S5(98.9); S15(0)]	P97467	Pam	5	5	17.8513	18.2833	18.0673	0.138421	0.741254	-1.34907	12Mo-KO_1Way down vs WT	-2.05223	1.12762	-0.43196	P97467	GKGSSGLNLGNFFASR	1xPhospho [S5(98.9)]	1xPhospho [S4(1.1); S5(98.9); S15(0)]	NP_038654	0.00315274	0	Pam	peptidylglycine alpha-amidating monooxygenase	18484	Pam	1 D|1 47.76 cM	protein-coding	-1σ	18.7785	18.2539	17.5318	18.0161	18.836	18.0726	18.0552	17.8279	17.7457	17.5551
2773	663	A0A1B0GS91_SLSDYTGPPQLQVPR_1xPhospho [S3(100)]_1xPhospho [S1(0.1); S3(100); Y5(0); T6(0)]	A0A1B0GS91	---	5	5	19.7751	19.9862	19.8806	0.139224	0.863863	-1.15759	12Mo-KO_1Way down vs WT	-1.42172	1.06097	-0.211125	A0A1B0GS91	SLSDYTGPPQLQVPR	1xPhospho [S3(100)]	1xPhospho [S1(0.1); S3(100); Y5(0); T6(0)]	---	0.000756692	0	Svil	supervillin	225115	Svil	18|18 A1	protein-coding	-0.5σ	20.077	20.3802	19.7563	19.7154	20.0023	19.7845	19.7451	19.9374	19.6634	19.7451
347	664	P59017_SHTGEAAAVR_1xPhospho [S1(92.4)]_1xPhospho [S1(92.4); T3(7.6)]	P59017	Bcl2l13	5	5	17.1496	17.5924	17.371	0.139281	0.73569	-1.35927	12Mo-KO_1Way down vs WT	-2.09195	1.13225	-0.44283	P59017	SHTGEAAAVR	1xPhospho [S1(92.4)]	1xPhospho [S1(92.4); T3(7.6)]	NP_705736	0.0137758	0	Bcl2l13	BCL2-like 13 (apoptosis facilitator)	94044	Bcl2l13	6 F1|6 57.01 cM	protein-coding	-1σ	17.911	17.8625	17.4347	17.6924	17.0614	17.7989	17.221	17.4015	16.6809	16.6455
2004	665	A0A0M3HEP7_SESLQQNLLHGYAFSQDENGIVSQSEVIR_1xDeamidated [N/Q]; 1xPhospho [S3(96.8)]_1xDeamidated [Q5; Q6; N7; Q16; N19; Q24]; 1xPhospho [S1(3.2); S3(96.8); Y12(0); S15(0); S23(0); S25(0)]	A0A0M3HEP7	Atp8a1	5	5	17.7746	17.3108	17.5427	0.139709	1.37913	1.37913	12Mo-KO_1Way up vs WT	-1.13955	2.16743	0.463756	A0A0M3HEP7	SESLQQNLLHGYAFSQDENGIVSQSEVIR	1xDeamidated [N/Q]; 1xPhospho [S3(96.8)]	1xDeamidated [Q5; Q6; N7; Q16; N19; Q24]; 1xPhospho [S1(3.2); S3(96.8); Y12(0); S15(0); S23(0); S25(0)]	NP_001271274	0.0332129	0.00049971	Atp8a1	ATPase, aminophospholipid transporter (APLT), class I, type 8A, member 1	11980	Atp8a1	5|5 C3.1	protein-coding	+1σ	17.2876	16.9951	16.48	17.8508	17.9406	17.7042	17.8421	17.5033	17.8943	17.9289
3173	666	Q8BKU8_WVEENIPSSFTDVALPVLVDSDEEIMTR_1xPhospho [S21(96.5)]_1xPhospho [S8(0); S9(0); T11(0); S21(96.5); T27(3.5)]	Q8BKU8	Tmem87b	5	5	15.7314	15.1362	15.4338	0.139939	1.51061	1.51061	12Mo-KO_1Way up vs WT	-1.18298	2.69949	0.595133	Q8BKU8	WVEENIPSSFTDVALPVLVDSDEEIMTR	1xPhospho [S21(96.5)]	1xPhospho [S8(0); S9(0); T11(0); S21(96.5); T27(3.5)]	NP_082524	0.11004	0.00295964	Tmem87b	transmembrane protein 87B	72477	Tmem87b	2|2 F1	protein-coding	+2σ	14.7166	15.1447	16.1296	14.6668	15.0236	15.4082	16.1679	15.3911	15.21	16.4796
1440	667	P14873_SPSLSPSPPSPIEK_1xPhospho [S10(100)]_1xPhospho [S1(0); S3(0); S5(0); S7(0); S10(100)]	P14873	Map1b	5	5	17.9708	18.2072	18.089	0.141286	0.84885	-1.17806	12Mo-KO_1Way down vs WT	-1.48498	1.06999	-0.236419	P14873	SPSLSPSPPSPIEK	1xPhospho [S10(100)]	1xPhospho [S1(0); S3(0); S5(0); S7(0); S10(100)]	NP_032660	0.00701066	0	Map1b	microtubule-associated protein 1B	17755	Map1b	13 D1|13 52.9 cM	protein-coding	-0.5σ	18.5184	17.9733	18.5051	17.9707	18.0686	17.9874	18.1834	18.0552	17.8495	17.7786
1951	668	P70271_RSSVSGISLEDNR_1xPhospho [S3(88.6)]_1xPhospho [S2(11.2); S3(88.6); S5(0.2); S8(0)]	P70271	Pdlim4	5	5	19.0598	18.5286	18.7942	0.141556	1.44516	1.44516	12Mo-KO_1Way up vs WT	-1.16465	2.43234	0.531225	P70271	RSSVSGISLEDNR	1xPhospho [S3(88.6)]	1xPhospho [S2(11.2); S3(88.6); S5(0.2); S8(0)]	NP_062290	0.0994807	0.00244569	Pdlim4	PDZ and LIM domain 4	30794	Pdlim4	11 B1.3|11 32.13 cM	protein-coding	+1σ	17.8965	18.6032	19.1209	19.1436	17.8786	19.1646	19.1965	18.4151	19.4004	19.1223
2286	669	Q3UH06_EQASPGETDPQSPAAIVQDLLELCGK_1xCarbamidomethyl [C24]; 1xPhospho [S12(99.8)]_1xCarbamidomethyl [C24]; 1xPhospho [S4(0.1); T8(0.1); S12(99.8)]	Q3UH06	Rreb1	5	5	13.929	14.5543	14.2416	0.141683	0.648251	-1.54261	12Mo-KO_1Way down vs WT	-2.84798	1.19681	-0.625375	Q3UH06	EQASPGETDPQSPAAIVQDLLELCGK	1xCarbamidomethyl [C24]; 1xPhospho [S12(99.8)]	1xCarbamidomethyl [C24]; 1xPhospho [S4(0.1); T8(0.1); S12(99.8)]	NP_001034277	0.0232469	0.000280731	Rreb1	ras responsive element binding protein 1	68750	Rreb1	13|13 A3.3	protein-coding	-2σ	14.087	14.4682	14.6911	15.0442	14.4811	13.4882	12.7776	14.3504	14.7017	14.327
1894	670	Q9ET54_SRDSGDENEPIQER_1xPhospho [S4(100)]_1xPhospho [S1(0); S4(100)]	Q9ET54	Palld	5	5	21.0329	20.6365	20.8347	0.141947	1.31623	1.31623	12Mo-KO_1Way up vs WT	-1.12095	1.94199	0.396407	Q9ET54	SRDSGDENEPIQER	1xPhospho [S4(100)]	1xPhospho [S1(0); S4(100)]	NP_001074859	5.42515e-05	0	Palld	palladin, cytoskeletal associated protein	72333	Palld	8|8 B3.1	protein-coding	+1σ	20.0447	21.1173	20.2748	20.7703	20.9755	20.6244	21.2479	20.8516	21.3275	21.1133
3089	671	A2ASS6_QQSPSPIRHSPSPVR_2xPhospho [S10(99.9); S12(100)]_2xPhospho [S3(0); S5(0); S10(99.9); S12(100)]	A2ASS6	---	5	5	17.4814	18.0821	17.7817	0.142086	0.65943	-1.51646	12Mo-KO_1Way down vs WT	-2.73468	1.18917	-0.600708	A2ASS6	QQSPSPIRHSPSPVR	2xPhospho [S10(99.9); S12(100)]	2xPhospho [S3(0); S5(0); S10(99.9); S12(100)]	---	0.0894575	0.00215274	Ttn	titin	22138	Ttn	2 C3|2 45.13 cM	protein-coding	-2σ	16.9136	18.193	19.0477	17.8762	18.3802	17.2854	17.5086	17.4573	17.911	17.2448
685	672	Q9DD18_SASSGAEGDVSSEREP_1xPhospho [S1(88.8)]_1xPhospho [S1(88.8); S3(10); S4(1.2); S11(0); S12(0)]	Q9DD18	Dtd1	5	5	19.0146	19.1973	19.1059	0.142462	0.881057	-1.135	12Mo-KO_1Way down vs WT	-1.35819	1.05431	-0.182693	Q9DD18	SASSGAEGDVSSEREP	1xPhospho [S1(88.8)]	1xPhospho [S1(88.8); S3(10); S4(1.2); S11(0); S12(0)]	NP_079590	0.0164269	0	Dtd1	D-tyrosyl-tRNA deacylase 1	66044	Dtd1	2|2 G1	protein-coding	-0.5σ	18.9715	19.3325	19.2619	19.0163	19.4041	18.8029	19.2436	19.0704	18.9666	18.9894
3027	673	A2ASS6_LEEELELGFSASPPSRSPPR_2xPhospho [S10(90.5); S15(98.9)]_2xPhospho [S10(90.5); S12(9.5); S15(98.9); S17(1.1)]	A2ASS6	---	5	5	22.4518	22.7473	22.5996	0.142626	0.814759	-1.22736	12Mo-KO_1Way down vs WT	-1.64119	1.08947	-0.295555	A2ASS6	LEEELELGFSASPPSRSPPR	2xPhospho [S10(90.5); S15(98.9)]	2xPhospho [S10(90.5); S12(9.5); S15(98.9); S17(1.1)]	---	0.000409655	0	Ttn	titin	22138	Ttn	2 C3|2 45.13 cM	protein-coding	-1σ	22.9144	22.8887	22.6029	22.8113	22.5194	22.4868	22.2853	21.9742	22.9726	22.5401
2922	674	Q5SVR0_ASVSDPAPESLPTPQEASEPPASPSSPLSSPPSFSTQEIPTTSQGLLK_1xPhospho [T/S]_1xPhospho [S2(0.1); S4(0.7); S10(13.7); T13(40.8); S18(40.8); S23(0.7); S25(0.7); S26(0.7); S29(0.7); S30(0.7); S33(0.3); S35(0.3); T36(0.3); T41(0); T42(0); S43(0)]	Q5SVR0	Tbc1d9b	5	5	17.6204	16.5466	17.0835	0.14263	2.10486	2.10486	12Mo-KO_1Way up vs WT	-1.36524	6.0486	1.07372	Q5SVR0	ASVSDPAPESLPTPQEASEPPASPSSPLSSPPSFSTQEIPTTSQGLLK	1xPhospho [T/S]	1xPhospho [S2(0.1); S4(0.7); S10(13.7); T13(40.8); S18(40.8); S23(0.7); S25(0.7); S26(0.7); S29(0.7); S30(0.7); S33(0.3); S35(0.3); T36(0.3); T41(0); T42(0); S43(0)]	NP_001277688	0.0109636	0	Tbc1d9b	TBC1 domain family, member 9B	76795	Tbc1d9b	11|11 B1.3	protein-coding	+2σ	16.6856	15.9219	16.619	15.5191	17.9876	18.2487	18.1181	15.6003	17.9046	18.2301
1243	675	Q9ET78_SPARPASEHMAIEALQPPPAPSQEPEVAMYR_1xPhospho [S1(99.6)]_1xPhospho [S1(99.6); S7(0.4); S22(0); Y30(0)]	Q9ET78	Jph2	5	5	18.9119	17.8389	18.3754	0.142717	2.10391	2.10391	12Mo-KO_1Way up vs WT	-1.36535	6.04365	1.07307	Q9ET78	SPARPASEHMAIEALQPPPAPSQEPEVAMYR	1xPhospho [S1(99.6)]	1xPhospho [S1(99.6); S7(0.4); S22(0); Y30(0)]	NP_001192005	3.4691e-05	0	Jph2	junctophilin 2	59091	Jph2	2|2 H3	protein-coding	+2σ	19.8553	16.6672	17.2005	17.6996	17.7717	19.4742	18.8253	19.0343	17.5339	19.692
1501	676	E9PX30_RQSSPSCVPVAETSSSIGNGDGISK_1xCarbamidomethyl [C7]; 2xDeamidated [Q2; N19]; 1xPhospho [S3(78.4)]_1xCarbamidomethyl [C7]; 2xDeamidated [Q2; N19]; 1xPhospho [S3(78.4); S4(17.5); S6(4.1); T13(0); S14(0); S15(0); S16(0); S24(0)]	E9PX30	---	5	5	15.5261	15.9831	15.7546	0.143172	0.728514	-1.37266	12Mo-KO_1Way down vs WT	-2.15264	1.14248	-0.456971	E9PX30	RQSSPSCVPVAETSSSIGNGDGISK	1xCarbamidomethyl [C7]; 2xDeamidated [Q2; N19]; 1xPhospho [S3(78.4)]	1xCarbamidomethyl [C7]; 2xDeamidated [Q2; N19]; 1xPhospho [S3(78.4); S4(17.5); S6(4.1); T13(0); S14(0); S15(0); S16(0); S24(0)]	---	0.0695417	0.00104129	Map4k5	mitogen-activated protein kinase kinase kinase kinase 5	399510	Map4k5	12|12 C2	protein-coding	-1σ	16.1204	15.2959	16.5069	16.1158	15.8763	15.7546	14.813	15.642	15.9826	15.4383
2059	677	Q9ES82_SQAPLAPIHTPEL_1xPhospho [T10(100)]_1xPhospho [S1(0); T10(100)]	Q9ES82	Popdc2	5	5	17.1585	17.5226	17.3406	0.143448	0.776951	-1.28708	12Mo-KO_1Way down vs WT	-1.84259	1.11228	-0.364105	Q9ES82	SQAPLAPIHTPEL	1xPhospho [T10(100)]	1xPhospho [S1(0); T10(100)]	NP_071713	0.0249663	0.000280731	Popdc2	popeye domain containing 2	64082	Popdc2	16|16 B3	protein-coding	-1σ	18.1167	17.4058	17.2773	17.7972	17.0161	17.3926	16.9955	17.1531	16.8381	17.4134
2730	678	E9QQ25_AASVELPQR_1xPhospho [S3(100)]_1xPhospho [S3(100)]	E9QQ25	Speg	5	5	20.0164	19.7095	19.863	0.143776	1.23709	1.23709	12Mo-KO_1Way up vs WT	-1.09417	1.67449	0.306945	E9QQ25	AASVELPQR	1xPhospho [S3(100)]	1xPhospho [S3(100)]	NP_031489	0.0511788	0.00104129	Speg	SPEG complex locus	11790	Speg	1 C4|1 38.88 cM	protein-coding	+1σ	19.8971	19.8422	19.5934	19.9987	19.216	20.2875	20.3447	19.8215	19.7069	19.9215
2449	679	Q52KI8_SPSPAPPPPPPPPPPR_2xPhospho [S1(100); S3(100)]_2xPhospho [S1(100); S3(100)]	Q52KI8	Srrm1	5	5	15.9754	16.6882	16.3318	0.144046	0.610174	-1.63888	12Mo-KO_1Way down vs WT	-3.31191	1.23307	-0.712708	Q52KI8	SPSPAPPPPPPPPPPR	2xPhospho [S1(100); S3(100)]	2xPhospho [S1(100); S3(100)]	NP_058079	0.0415324	0.000734311	Srrm1	serine/arginine repetitive matrix 1	51796	Srrm1	4|4 D3	protein-coding	-2σ	16.5387	16.5539	16.7325	17.1356	16.48	16.8967	15.6669	17.0566	15.272	14.985
1208	680	P11881_RESLTSFGNGPLSPGGPSKPGGGGGGPGSSSTSR_1xDeamidated [N9]; 1xPhospho [S/T]_1xDeamidated [N9]; 1xPhospho [S3(69.3); T5(15.3); S6(15.3); S13(0); S18(0); S29(0); S30(0); S31(0); T32(0); S33(0)]	P11881	Itpr1	5	5	15.7384	16.2485	15.9934	0.144317	0.702219	-1.42406	12Mo-KO_1Way down vs WT	-2.35686	1.16219	-0.510006	P11881	RESLTSFGNGPLSPGGPSKPGGGGGGPGSSSTSR	1xDeamidated [N9]; 1xPhospho [S/T]	1xDeamidated [N9]; 1xPhospho [S3(69.3); T5(15.3); S6(15.3); S13(0); S18(0); S29(0); S30(0); S31(0); T32(0); S33(0)]	NP_034715	0.00760115	0	Itpr1	inositol 1,4,5-trisphosphate receptor 1	16438	Itpr1	6 E1- E2|6 49.74 cM	protein-coding	-1σ	16.3518	16.4545	16.9879	16.181	15.267	16.0384	15.8563	15.1886	15.8516	15.7572
1136	681	Q00PI9_SGDETPGSEAPGDK_1xPhospho [S1(100)]_1xPhospho [S1(100); T5(0); S8(0)]	Q00PI9	Hnrnpul2	5	5	21.0925	21.3417	21.2171	0.144447	0.841391	-1.18851	12Mo-KO_1Way down vs WT	-1.52032	1.07629	-0.249152	Q00PI9	SGDETPGSEAPGDK	1xPhospho [S1(100)]	1xPhospho [S1(100); T5(0); S8(0)]	NP_001074665	0.000550179	0	Hnrnpul2	heterogeneous nuclear ribonucleoprotein U-like 2	68693	Hnrnpul2	19|19 A	protein-coding	-0.5σ	20.8933	21.3823	21.3179	21.6064	21.5083	21.208	21.2788	21.2393	20.9088	20.8276
2703	682	E9QQ25_AASSEAAPHHQPPPESR_1xPhospho [S4(93.8)]_1xPhospho [S3(6.2); S4(93.8); S16(0)]	E9QQ25	Speg	5	5	21.3959	20.8227	21.1093	0.144539	1.48777	1.48777	12Mo-KO_1Way up vs WT	-1.18445	2.62174	0.573155	E9QQ25	AASSEAAPHHQPPPESR	1xPhospho [S4(93.8)]	1xPhospho [S3(6.2); S4(93.8); S16(0)]	NP_031489	5.2725e-05	0	Speg	SPEG complex locus	11790	Speg	1 C4|1 38.88 cM	protein-coding	+2σ	20.9476	20.7044	20.089	21.8107	20.562	21.5439	21.7191	20.9515	20.8456	21.9193
100	683	P48962_AAYFGVYDTAK_1xPhospho [Y7(90.5)]_1xPhospho [Y3(9.5); Y7(90.5); T9(0)]	P48962	Slc25a4	5	5	17.952	18.3042	18.1281	0.144666	0.783419	-1.27646	12Mo-KO_1Way down vs WT	-1.80815	1.10975	-0.352144	P48962	AAYFGVYDTAK	1xPhospho [Y7(90.5)]	1xPhospho [Y3(9.5); Y7(90.5); T9(0)]	NP_031476	0.02392	0.000280731	Slc25a4	solute carrier family 25 (mitochondrial carrier, adenine nucleotide translocator), member 4	11739	Slc25a4	8 B1.1|8 26.22 cM	protein-coding	-1σ	18.1679	17.9707	18.535	17.964	18.8833	18.1213	17.9524	17.4749	18.1813	18.0304
3195	684	Q3U1U6_NGSPPPGAPASR_1xDeamidated [N1]; 1xPhospho [S3(100)]_1xDeamidated [N1]; 1xPhospho [S3(100); S11(0)]	Q3U1U6	Tsc22d4	5	5	18.8459	19.1167	18.9813	0.144885	0.828874	-1.20646	12Mo-KO_1Way down vs WT	-1.57714	1.08354	-0.270775	Q3U1U6	NGSPPPGAPASR	1xDeamidated [N1]; 1xPhospho [S3(100)]	1xDeamidated [N1]; 1xPhospho [S3(100); S11(0)]	NP_084081	0.102734	0.00244569	Tsc22d4	TSC22 domain family, member 4	78829	Tsc22d4	5|5 G2	protein-coding	-0.5σ	18.7355	19.236	19.1975	19.3064	19.1079	19.0296	19.0855	19.0521	18.6491	18.4131
2826	685	B2RQK7_SPSPTPSLPPSWK_2xPhospho [S1(100); S3(100)]_2xPhospho [S1(100); S3(100); T5(0); S7(0); S11(0)]	B2RQK7	Synpo2l	5	5	19.9788	19.6146	19.7967	0.144933	1.28716	1.28716	12Mo-KO_1Way up vs WT	-1.11401	1.84566	0.364188	B2RQK7	SPSPTPSLPPSWK	2xPhospho [S1(100); S3(100)]	2xPhospho [S1(100); S3(100); T5(0); S7(0); S11(0)]	NP_001297360	0.000413571	0	Synpo2l	synaptopodin 2-like	68760	Synpo2l	14|14 A3	protein-coding	+1σ	19.0712	20.041	19.5545	19.3772	20.0291	19.9855	19.6022	20.1156	20.3404	19.8501
32	686	Q3U3J1_IGHHSTSDDSSAYRSVDEVNYWDK_2xPhospho [S5(85.6); S15(100)]_2xPhospho [S5(85.6); T6(12.5); S7(1.9); S10(0); S11(0); Y13(0); S15(100); Y21(0)]	Q3U3J1	Bckdha	5	5	19.9626	20.5477	20.2552	0.145208	0.666585	-1.50018	12Mo-KO_1Way down vs WT	-2.67807	1.18997	-0.585138	Q3U3J1	IGHHSTSDDSSAYRSVDEVNYWDK	2xPhospho [S5(85.6); S15(100)]	2xPhospho [S5(85.6); T6(12.5); S7(1.9); S10(0); S11(0); Y13(0); S15(100); Y21(0)]	NP_031559	0.00593543	0	Bckdha	branched chain ketoacid dehydrogenase E1, alpha polypeptide	12039	Bckdha	7|7 A3	protein-coding	-2σ	20.089	21.0156	21.1566	20.4825	19.9949	19.275	19.451	20.7904	20.0252	20.2713
2161	687	Q9QYG0_TASLTSAASIDGSR_2xPhospho [S3(100); S9(89.9)]_2xPhospho [T1(0); S3(100); T5(0); S6(0); S9(89.9); S13(10.1)]	Q9QYG0	Ndrg2	5	5	19.8762	19.5301	19.7032	0.145434	1.27113	1.27113	12Mo-KO_1Way up vs WT	-1.1086	1.79123	0.346107	Q9QYG0	TASLTSAASIDGSR	2xPhospho [S3(100); S9(89.9)]	2xPhospho [T1(0); S3(100); T5(0); S6(0); S9(89.9); S13(10.1)]	NP_001139431	0.000457018	0	Ndrg2	N-myc downstream regulated gene 2	29811	Ndrg2	14|14 C2	protein-coding	+1σ	18.8789	20.089	19.7274	19.3857	19.5695	19.8501	19.6568	19.796	20.1253	19.9529
3323	688	Q7TQJ8_ESEPTAGSPGR_1xPhospho [S8(98.9)]_1xPhospho [S2(0); T5(1.1); S8(98.9)]	Q7TQJ8	Wtip	5	5	15.1081	15.5712	15.3397	0.145495	0.725427	-1.3785	12Mo-KO_1Way down vs WT	-2.1815	1.148	-0.463098	Q7TQJ8	ESEPTAGSPGR	1xPhospho [S8(98.9)]	1xPhospho [S2(0); T5(1.1); S8(98.9)]	NP_997095	0.0603882	0.00104129	Wtip	WT1-interacting protein	101543	Wtip	7|7 B1	protein-coding	-1σ	15.9357	15.6948	15.4017	15.2257	15.5981	15.2343	15.0919	16.0085	14.5164	14.6894
921	689	Q76LL6_GAISPDVESQDKVPDTPPAQLK_1xPhospho [S4(100)]_1xPhospho [S4(100); S9(0); T16(0)]	Q76LL6	Fhod3	5	5	18.1407	17.6614	17.9011	0.146177	1.39414	1.39414	12Mo-KO_1Way up vs WT	-1.15465	2.2442	0.479374	Q76LL6	GAISPDVESQDKVPDTPPAQLK	1xPhospho [S4(100)]	1xPhospho [S4(100); S9(0); T16(0)]	NP_001276583	0.00671685	0	Fhod3	formin homology 2 domain containing 3	225288	Fhod3	18|18 A2	protein-coding	+1σ	17.8829	17.4998	17.1549	18.2332	17.536	18.7299	18.2135	17.2872	18.2184	18.2546
3081	690	A2ASS6_NSMTVNWEEPEYDGGSPVTGYWLEMK_1xDeamidated [N6]; 1xPhospho [T4(81.7)]_1xDeamidated [N6]; 1xPhospho [S2(18.3); T4(81.7); Y12(0); S16(0); T19(0); Y21(0)]	A2ASS6	---	5	5	16.2371	16.6443	16.4407	0.146329	0.754084	-1.32611	12Mo-KO_1Way down vs WT	-1.98739	1.13012	-0.407202	A2ASS6	NSMTVNWEEPEYDGGSPVTGYWLEMK	1xDeamidated [N6]; 1xPhospho [T4(81.7)]	1xDeamidated [N6]; 1xPhospho [S2(18.3); T4(81.7); Y12(0); S16(0); T19(0); Y21(0)]	---	0.0557299	0.00104129	Ttn	titin	22138	Ttn	2 C3|2 45.13 cM	protein-coding	-1σ	16.7579	16.8606	15.9546	17.1662	16.4825	16.2174	15.7925	16.7243	16.1496	16.3019
2237	691	P35486_YHGHSMSDPGVSYR_1xOxidation [M6]; 1xPhospho [S5(100)]_1xOxidation [M6]; 1xPhospho [Y1(0); S5(100); S7(0); S12(0); Y13(0)]	P35486	Pdha1	5	5	18.711	18.0471	18.379	0.146493	1.58435	1.58435	12Mo-KO_1Way up vs WT	-1.22108	3.06512	0.663892	P35486	YHGHSMSDPGVSYR	1xOxidation [M6]; 1xPhospho [S5(100)]	1xOxidation [M6]; 1xPhospho [Y1(0); S5(100); S7(0); S12(0); Y13(0)]	NP_032836	0.000281328	0	Pdha1	pyruvate dehydrogenase E1 alpha 1	18597	Pdha1	X F4|X 73.95 cM	protein-coding	+2σ	18.3101	17.5838	18.7893	18.3829	17.1695	18.7869	19.2244	17.5814	18.9841	18.9782
608	692	Q61686_SSFSNSADDIK_1xPhospho [S]_1xPhospho [S1(47.9); S2(47.9); S4(1); S6(3.2)]	Q61686	Cbx5	5	5	16.3704	16.6789	16.5247	0.146599	0.807496	-1.2384	12Mo-KO_1Way down vs WT	-1.68292	1.09735	-0.308472	Q61686	SSFSNSADDIK	1xPhospho [S]	1xPhospho [S1(47.9); S2(47.9); S4(1); S6(3.2)]	NP_001070257	0.218385	0.00943619	Cbx5	chromobox 5	12419	Cbx5	15|15 F3	protein-coding	-1σ	16.8433	16.0948	16.6097	17.189	16.6576	16.37	16.3239	16.1402	16.4409	16.5771
1144	693	Q9Z204_MESEAGADDSAEEGDLLDDDDNEDRGDDQLELK_1xPhospho [S3(99.9)]_1xPhospho [S3(99.9); S10(0.1)]	Q9Z204	Hnrnpc	5	5	18.4396	17.9235	18.1816	0.146755	1.43007	1.43007	12Mo-KO_1Way up vs WT	-1.16842	2.38952	0.516083	Q9Z204	MESEAGADDSAEEGDLLDDDDNEDRGDDQLELK	1xPhospho [S3(99.9)]	1xPhospho [S3(99.9); S10(0.1)]	NP_001164452	0.00169872	0	Hnrnpc	heterogeneous nuclear ribonucleoprotein C	15381	Hnrnpc	14 C2|14 26.79 cM	protein-coding	+1σ	18.1783	18.0044	18.2219	17.5605	17.6523	17.8626	17.7634	19.3465	18.5017	18.7237
1850	694	Q6DFW4_EEPLSEEEPCTSTAVPSPEK_1xCarbamidomethyl [C10]; 1xPhospho [S5(100)]_1xCarbamidomethyl [C10]; 1xPhospho [S5(100); T11(0); S12(0); T13(0); S17(0)]	Q6DFW4	Nop58	5	5	17.1218	17.6452	17.3835	0.146833	0.695724	-1.43735	12Mo-KO_1Way down vs WT	-2.41954	1.17114	-0.523413	Q6DFW4	EEPLSEEEPCTSTAVPSPEK	1xCarbamidomethyl [C10]; 1xPhospho [S5(100)]	1xCarbamidomethyl [C10]; 1xPhospho [S5(100); T11(0); S12(0); T13(0); S17(0)]	NP_061356	0.00188613	0	Nop58	NOP58 ribonucleoprotein	55989	Nop58	1|1 C2	protein-coding	-1σ	17.8201	18.0918	17.8551	16.6322	17.8267	17.6374	17.0876	16.8255	17.4863	16.5721
1012	695	Q8C0L9_KQSLYEEENFFSENQPFPSLK_1xPhospho [S3(100)]_1xPhospho [S3(100); Y5(0); S12(0); S19(0)]	Q8C0L9	Gpcpd1	5	5	17.6455	16.2867	16.9661	0.147234	2.56487	2.56487	12Mo-KO_1Way up vs WT	-1.50934	9.92929	1.35889	Q8C0L9	KQSLYEEENFFSENQPFPSLK	1xPhospho [S3(100)]	1xPhospho [S3(100); Y5(0); S12(0); S19(0)]	NP_001277979	0.0168222	0	Gpcpd1	glycerophosphocholine phosphodiesterase 1	74182	Gpcpd1	2 F2|2	protein-coding	+3σ	17.4834	14.8317	17.8901	17.1118	14.1162	18.1078	18.1617	17.2827	16.3305	18.3451
148	696	Q9WTQ5_LSADYEKVELPLEDQVGDLEALSEK_1xPhospho [S2(100)]_1xPhospho [S2(100); Y5(0); S23(0)]	Q9WTQ5	Akap12	5	5	17.613	17.9005	17.7568	0.147282	0.819341	-1.22049	12Mo-KO_1Way down vs WT	-1.62521	1.09103	-0.287464	Q9WTQ5	LSADYEKVELPLEDQVGDLEALSEK	1xPhospho [S2(100)]	1xPhospho [S2(100); Y5(0); S23(0)]	NP_112462	0.0355001	0.00049971	Akap12	A kinase (PRKA) anchor protein (gravin) 12	83397	Akap12	10|10 A1	protein-coding	-1σ	18.4068	17.7237	17.6984	18.011	17.6624	17.9542	17.7798	17.3596	17.4423	17.5291
2579	697	G3X9J1_AVSMHEVNMEMAENDPVSK_1xPhospho [S3(100)]_1xPhospho [S3(100); S18(0)]	G3X9J1	Slc8a1	5	5	17.7019	16.8346	17.2682	0.147992	1.82422	1.82422	12Mo-KO_1Way up vs WT	-1.3029	4.33576	0.86728	G3X9J1	AVSMHEVNMEMAENDPVSK	1xPhospho [S3(100)]	1xPhospho [S3(100); S18(0)]	NP_035536	0.0383074	0.00049971	Slc8a1	solute carrier family 8 (sodium/calcium exchanger), member 1	20541	Slc8a1	17 E3|17 51.29 cM	protein-coding	+2σ	18.4576	17.4164	15.5903	16.8551	15.8539	18.0794	17.5948	17.7935	17.2415	17.8004
766	698	S4R1P5_RGSDASDFDISEIQSVCSDVETVPQTHRPVPR_1xCarbamidomethyl [C17]; 1xPhospho [S3(100)]_1xCarbamidomethyl [C17]; 1xPhospho [S3(100); S6(0); S11(0); S15(0); S18(0); T22(0); T26(0)]	S4R1P5	Dst	5	5	17.7063	18.6312	18.1687	0.148082	0.526703	-1.8986	12Mo-KO_1Way down vs WT	-4.78101	1.32633	-0.924937	S4R1P5	RGSDASDFDISEIQSVCSDVETVPQTHRPVPR	1xCarbamidomethyl [C17]; 1xPhospho [S3(100)]	1xCarbamidomethyl [C17]; 1xPhospho [S3(100); S6(0); S11(0); S15(0); S18(0); T22(0); T26(0)]	NP_001263693	6.68986e-06	0	Dst	dystonin	13518	Dst	1 B|1 12.91 cM	protein-coding	-2σ	18.5907	18.688	18.6258	19.1	18.1516	17.4015	18.0632	18.6137	18.7624	15.6906
765	699	F8WIV5_EALNIIGDISTSTVSTPVPPPVDDTWLQNTSGHSPTPQR_1xDeamidated [N/Q]; 1xPhospho [S/T]_1xDeamidated [N4; Q28; N29; Q38]; 1xPhospho [S10(0); T11(0); S12(0); T13(0); S15(0); T16(0); T25(3.4); T30(14.8); S31(14.8); S34(66.3); T36(0.8)]	F8WIV5	---	5	5	17.0852	16.7859	16.9355	0.149752	1.23057	1.23057	12Mo-KO_1Way up vs WT	-1.09724	1.66155	0.299322	F8WIV5	EALNIIGDISTSTVSTPVPPPVDDTWLQNTSGHSPTPQR	1xDeamidated [N/Q]; 1xPhospho [S/T]	1xDeamidated [N4; Q28; N29; Q38]; 1xPhospho [S10(0); T11(0); S12(0); T13(0); S15(0); T16(0); T25(3.4); T30(14.8); S31(14.8); S34(66.3); T36(0.8)]	---	0.000160486	0	Dnm2	dynamin 2	13430	Dnm2	9 A3|9 7.79 cM	protein-coding	+1σ	17.1431	16.2918	16.8195	17.1872	16.488	16.9955	16.9017	17.0727	17.2148	17.2415
3067	700	A2ASS6_RSLSPTYIELMRPVSELIR_2xPhospho [S2(100); T6(87.6)]_2xPhospho [S2(100); S4(12.4); T6(87.6); Y7(0); S15(0)]	A2ASS6	---	5	5	18.6109	18.131	18.371	0.149893	1.39466	1.39466	12Mo-KO_1Way up vs WT	-1.16065	2.25756	0.479916	A2ASS6	RSLSPTYIELMRPVSELIR	2xPhospho [S2(100); T6(87.6)]	2xPhospho [S2(100); S4(12.4); T6(87.6); Y7(0); S15(0)]	---	0.0246125	0.000280731	Ttn	titin	22138	Ttn	2 C3|2 45.13 cM	protein-coding	+1σ	17.4039	18.4418	17.9014	18.49	18.4179	18.1907	18.2006	18.5188	19.3439	18.8006
761	701	Q61214_IYQYIQSR_1xPhospho [S7(100)]_1xPhospho [Y2(0); Y4(0); S7(100)]	Q61214	Dyrk1a	5	5	18.726	18.4602	18.5931	0.149926	1.20224	1.20224	12Mo-KO_1Way up vs WT	-1.08601	1.56969	0.265719	Q61214	IYQYIQSR	1xPhospho [S7(100)]	1xPhospho [Y2(0); Y4(0); S7(100)]	NP_001106860	0.217459	0.00943619	Dyrk1a	dual-specificity tyrosine-(Y)-phosphorylation regulated kinase 1a	13548	Dyrk1a	16 C4|16 55.3 cM	protein-coding	+0.5σ	18.0636	18.4102	18.3744	18.8538	18.5992	18.4545	19.022	18.5718	18.686	18.8955
61	702	E9Q9K8_GETIQDIDDWELSEMNSDSEIYPTYHIK_1xPhospho [T3(98.5)]_1xPhospho [T3(98.5); S13(0.1); S17(1.3); S19(0.1); Y22(0); T24(0); Y25(0)]	E9Q9K8	Akap6	5	5	16.8712	17.263	17.0671	0.150122	0.762183	-1.31202	12Mo-KO_1Way down vs WT	-1.94452	1.12962	-0.391791	E9Q9K8	GETIQDIDDWELSEMNSDSEIYPTYHIK	1xPhospho [T3(98.5)]	1xPhospho [T3(98.5); S13(0.1); S17(1.3); S19(0.1); Y22(0); T24(0); Y25(0)]	NP_932779	0.0854026	0.00215274	Akap6	A kinase (PRKA) anchor protein 6	238161	Akap6	12|12 C1	protein-coding	-1σ	17.7933	17.4565	17.1418	16.5416	17.3816	16.8936	17.3311	16.6134	16.9008	16.6169
206	703	G3UXF4_ELGESEGLSDDEETISTR_1xPhospho [S9(100)]_1xPhospho [S5(0); S9(100); T14(0); S16(0); T17(0)]	G3UXF4	---	5	5	19.4886	19.164	19.3263	0.150532	1.2523	1.2523	12Mo-KO_1Way up vs WT	-1.10666	1.73551	0.324575	G3UXF4	ELGESEGLSDDEETISTR	1xPhospho [S9(100)]	1xPhospho [S5(0); S9(100); T14(0); S16(0); T17(0)]	---	0.00118899	0	Ank1	ankyrin 1, erythroid	11733	Ank1	8 A2|8 11.42 cM	protein-coding	+1σ	18.7716	19.4484	19.7088	18.8436	19.0477	19.199	19.6237	19.4827	19.7568	19.3807
2254	704	Q8CAP3_AVEYLLTGIPGSPEPEHGSVQESQAPEQPATEAGENPLEFLR_1xDeamidated [Q/N]; 1xPhospho [T/S/Y]_1xDeamidated [Q21; Q24; Q28; N36]; 1xPhospho [Y4(0.1); T7(72.1); S12(1.4); S19(0.6); S23(25.3); T31(0.6)]	Q8CAP3	Rad23a	5	5	17.6414	17.8992	17.7703	0.15066	0.836331	-1.1957	12Mo-KO_1Way down vs WT	-1.54971	1.08394	-0.257854	Q8CAP3	AVEYLLTGIPGSPEPEHGSVQESQAPEQPATEAGENPLEFLR	1xDeamidated [Q/N]; 1xPhospho [T/S/Y]	1xDeamidated [Q21; Q24; Q28; N36]; 1xPhospho [Y4(0.1); T7(72.1); S12(1.4); S19(0.6); S23(25.3); T31(0.6)]	NP_001284535	0.000368951	0	Rad23a	RAD23 homolog A, nucleotide excision repair protein	19358	Rad23a	8|8 C3	protein-coding	-0.5σ	18.3802	17.7752	18.0581	17.8383	17.4443	17.5646	17.6281	17.7963	17.5325	17.6854
961	705	P63250_HNSVECLDGLDDISTK_1xCarbamidomethyl [C6]; 1xPhospho [S3(100)]_1xCarbamidomethyl [C6]; 1xPhospho [S3(100); S14(0); T15(0)]	P63250	Kcnj3	5	5	17.8816	18.2848	18.0832	0.150835	0.756182	-1.32243	12Mo-KO_1Way down vs WT	-1.98413	1.13455	-0.403194	P63250	HNSVECLDGLDDISTK	1xCarbamidomethyl [C6]; 1xPhospho [S3(100)]	1xCarbamidomethyl [C6]; 1xPhospho [S3(100); S14(0); T15(0)]	NP_032452	2.6852e-08	0	Kcnj3	potassium inwardly-rectifying channel, subfamily J, member 3	16519	Kcnj3	2|2 C1.1	protein-coding	-1σ	17.964	18.0343	19.0163	18.5032	17.9065	18.4187	17.7654	17.6268	17.8886	17.7087
1380	706	P14152_KLSSAMSAAK_1xPhospho [S3(85)]_1xPhospho [S3(85); S4(7.5); S7(7.5)]	P14152	Mdh1	5	5	20.1764	19.2062	19.6913	0.150844	1.95911	1.95911	12Mo-KO_1Way up vs WT	-1.35496	5.20049	0.970197	P14152	KLSSAMSAAK	1xPhospho [S3(85)]	1xPhospho [S3(85); S4(7.5); S7(7.5)]	NP_001303604	0.0504564	0.000921163	Mdh1	malate dehydrogenase 1, NAD (soluble)	17449	Mdh1	11 A3.1|11 13.89 cM	protein-coding	+2σ	17.0614	19.2737	19.1585	20.7198	19.8178	20.1156	20.2665	19.96	20.0327	20.5074
1633	707	Q5SX39; Q02566; Q91Z83; P13542_HADSVAELGEQIDNLQR_1xPhospho [S4(100)]_1xPhospho [S4(100)]	Q5SX39; Q02566; Q91Z83; P13542	---	5	5	21.1338	21.4071	21.2705	0.150872	0.827417	-1.20858	12Mo-KO_1Way down vs WT	-1.5912	1.08937	-0.273313	Q5SX39; Q02566; Q91Z83; P13542	HADSVAELGEQIDNLQR	1xPhospho [S4(100)]	1xPhospho [S4(100)]	---	1.76633e-07	0	Myh4	myosin, heavy polypeptide 4, skeletal muscle	17884	Myh4	11 B3|11 40.59 cM	protein-coding	-0.5σ	21.746	21.5207	21.549	21.1344	21.0855	21.1454	20.9442	21.5725	20.9587	21.0482
3251	708	Q6PIU9_SMEEFLAVQGSSQDLPMQANLSQSNEGPLLAGR_2xDeamidated [Q/N]; 1xPhospho [S1(100)]_2xDeamidated [Q9; Q13; Q18; N20; Q23; N25]; 1xPhospho [S1(100); S11(0); S12(0); S22(0); S24(0)]	Q6PIU9	---	5	5	16.9294	16.5166	16.723	0.151176	1.33128	1.33128	12Mo-KO_1Way up vs WT	-1.13842	2.01761	0.41281	Q6PIU9	SMEEFLAVQGSSQDLPMQANLSQSNEGPLLAGR	2xDeamidated [Q/N]; 1xPhospho [S1(100)]	2xDeamidated [Q9; Q13; Q18; N20; Q23; N25]; 1xPhospho [S1(100); S11(0); S12(0); S22(0); S24(0)]	---	0.000973669	0	---	---	---	---	---	---	+1σ	16.5093	16.37	16.6819	16.7044	16.3175	17.3243	16.1356	17.4052	16.5638	17.2184
982	709	P23242_MGQAGSTISNSHAQPFDFPDDSQNAK_1xOxidation [M1]; 1xPhospho [T7(80.3)]_1xOxidation [M1]; 1xPhospho [S6(2.7); T7(80.3); S9(14.3); S11(2.7); S22(0)]	P23242	Gja1	5	5	18.7958	19.0262	18.911	0.151433	0.852382	-1.17318	12Mo-KO_1Way down vs WT	-1.4799	1.07523	-0.230429	P23242	MGQAGSTISNSHAQPFDFPDDSQNAK	1xOxidation [M1]; 1xPhospho [T7(80.3)]	1xOxidation [M1]; 1xPhospho [S6(2.7); T7(80.3); S9(14.3); S11(2.7); S22(0)]	NP_034418	0.000266985	0	Gja1	gap junction protein, alpha 1	14609	Gja1	10 B4|10 28.64 cM	protein-coding	-0.5σ	18.8319	18.9043	19.5642	18.9235	18.9072	18.9684	18.8084	18.6475	18.8152	18.7394
2785	710	A0A1B0GS91_SPPAENSDSPVR_1xPhospho [S9(100)]_1xPhospho [S1(0); S7(0); S9(100)]	A0A1B0GS91	---	5	5	17.1207	17.3637	17.2422	0.151543	0.844976	-1.18346	12Mo-KO_1Way down vs WT	-1.51204	1.07958	-0.243017	A0A1B0GS91	SPPAENSDSPVR	1xPhospho [S9(100)]	1xPhospho [S1(0); S7(0); S9(100)]	---	0.0375854	0.00049971	Svil	supervillin	225115	Svil	18|18 A1	protein-coding	-0.5σ	16.9764	17.256	17.6064	17.2579	17.7217	17.3787	17.1889	16.9882	16.9882	17.0594
2939	711	E9Q0S6_VSPSIQPQPQSQPTSLSR_1xPhospho [S17(90.9)]_1xPhospho [S2(0); S4(0); S11(0); T14(0.8); S15(8.3); S17(90.9)]	E9Q0S6	Tns1	5	5	19.022	19.385	19.2035	0.151559	0.777565	-1.28607	12Mo-KO_1Way down vs WT	-1.85439	1.12117	-0.362965	E9Q0S6	VSPSIQPQPQSQPTSLSR	1xPhospho [S17(90.9)]	1xPhospho [S2(0); S4(0); S11(0); T14(0.8); S15(8.3); S17(90.9)]	NP_082160	0.00316777	0	Tns1	tensin 1	21961	Tns1	1 C3|1 38.17 cM	protein-coding	-1σ	19.557	19.5121	19.5194	18.7375	19.5989	19.1168	19.4423	19.1905	18.8698	18.4906
2259	712	A0A1W2P712_SSSTSDILEPFTVER_1xPhospho [S3(81.4)]_1xPhospho [S1(8.8); S2(8.8); S3(81.4); T4(1); S5(0); T12(0)]	A0A1W2P712	---	5	5	17.4773	17.7781	17.6277	0.151571	0.81184	-1.23177	12Mo-KO_1Way down vs WT	-1.66809	1.09941	-0.300733	A0A1W2P712	SSSTSDILEPFTVER	1xPhospho [S3(81.4)]	1xPhospho [S1(8.8); S2(8.8); S3(81.4); T4(1); S5(0); T12(0)]	---	0.00374163	0	Ralgapa1	Ral GTPase activating protein, alpha subunit 1	56784	Ralgapa1	12|12 C1	protein-coding	-1σ	18.2815	17.8671	17.2149	17.7146	17.8122	17.5856	17.5962	17.3894	17.1923	17.6232
2093	713	A0A087WR45_TGSLDESLSR_1xPhospho [S3(100)]_1xPhospho [T1(0); S3(100); S7(0); S9(0)]	A0A087WR45	Prob1	5	5	21.8518	21.6508	21.7513	0.15196	1.14945	1.14945	12Mo-KO_1Way up vs WT	-1.06561	1.40792	0.200944	A0A087WR45	TGSLDESLSR	1xPhospho [S3(100)]	1xPhospho [T1(0); S3(100); S7(0); S9(0)]	NP_001257575	0.00711142	0	Prob1	proline rich basic protein 1	381148	Prob1	18|18 B2	protein-coding	+0.5σ	21.49	21.6594	21.301	21.9169	21.887	21.8611	22.0157	21.7191	21.8611	21.8019
[truncated: 2,655 more rows]
