# Supplementary material for: Alterations in cytoskeletal and Ca2+ cycling regulators in atria lacking the obscurin Ig58/59 module
Source: Front Cardiovasc Med. 2023 Apr 13;10:1085840. doi: 10.3389/fcvm.2023.1085840 (PMC10251194; doi:10.3389/fcvm.2023.1085840)
Supplement: Supplementary file 13 [file Data_Sheet_5.xls]

## Sheet: Pathways
© 2000-2021 QIAGEN. All rights reserved.
Ingenuity Canonical Pathways	-log(p-value)	Ratio	z-score	Downregulated	No change	Upregulated	No overlap with dataset	Molecules
Glutathione Redox Reactions II	3.25	1	#NUM!	1/2 (50%)	0/2 (0%)	1/2 (50%)	0/2 (0%)	GLRX,PDIA3
D-myo-inositol (1,4,5,6)-Tetrakisphosphate Biosynthesis	1.64	0.115	#NUM!	1/26 (4%)	0/26 (0%)	2/26 (8%)	23/26 (88%)	ACP6,CA3,NUDT4
D-myo-inositol (3,4,5,6)-tetrakisphosphate Biosynthesis	1.64	0.115	#NUM!	1/26 (4%)	0/26 (0%)	2/26 (8%)	23/26 (88%)	ACP6,CA3,NUDT4
3-phosphoinositide Degradation	1.6	0.111	#NUM!	1/27 (4%)	0/27 (0%)	2/27 (7%)	24/27 (89%)	ACP6,CA3,NUDT4
Antioxidant Action of Vitamin C	1.57	0.182	#NUM!	1/11 (9%)	0/11 (0%)	1/11 (9%)	9/11 (82%)	GLRX,PDIA3
D-myo-inositol-5-phosphate Metabolism	1.55	0.107	#NUM!	1/28 (4%)	0/28 (0%)	2/28 (7%)	25/28 (89%)	ACP6,CA3,NUDT4
3-phosphoinositide Biosynthesis	1.51	0.103	#NUM!	1/29 (3%)	0/29 (0%)	2/29 (7%)	26/29 (90%)	ACP6,CA3,NUDT4
Neuropathic Pain Signaling In Dorsal Horn Neurons	1.49	0.167	#NUM!	2/12 (17%)	0/12 (0%)	0/12 (0%)	10/12 (83%)	CAMK2D,PDIA3
Factors Promoting Cardiogenesis in Vertebrates	1.43	0.154	#NUM!	2/13 (15%)	0/13 (0%)	0/13 (0%)	11/13 (85%)	CAMK2D,PDIA3
Superpathway of Inositol Phosphate Compounds	1.4	0.0938	#NUM!	1/32 (3%)	0/32 (0%)	2/32 (6%)	29/32 (91%)	ACP6,CA3,NUDT4
Trehalose Degradation II (Trehalase)	1.32	0.5	#NUM!	1/2 (50%)	0/2 (0%)	0/2 (0%)	1/2 (50%)	HK2
CMP-N-acetylneuraminate Biosynthesis I (Eukaryotes)	1.32	0.5	#NUM!	0/2 (0%)	0/2 (0%)	1/2 (50%)	1/2 (50%)	CMAS
NAD Phosphorylation and Dephosphorylation	1.32	0.5	#NUM!	0/2 (0%)	0/2 (0%)	1/2 (50%)	1/2 (50%)	ACP6
Glycine Cleavage Complex	1.32	0.5	#NUM!	1/2 (50%)	0/2 (0%)	0/2 (0%)	1/2 (50%)	GCSH
Ascorbate Recycling (Cytosolic)	1.32	0.5	#NUM!	0/2 (0%)	0/2 (0%)	1/2 (50%)	1/2 (50%)	GLRX
Melatonin Signaling	1.26	0.125	#NUM!	2/16 (13%)	0/16 (0%)	0/16 (0%)	14/16 (88%)	CAMK2D,PDIA3
PI3K Signaling in B Lymphocytes	1.21	0.118	#NUM!	2/17 (12%)	0/17 (0%)	0/17 (0%)	15/17 (88%)	CAMK2D,PDIA3
Insulin Secretion Signaling Pathway	1.19	0.0769	#NUM!	3/39 (8%)	0/39 (0%)	0/39 (0%)	36/39 (92%)	CAMK2D,PDIA3,STX16
Inosine-5'-phosphate Biosynthesis II	1.15	0.333	#NUM!	0/3 (0%)	0/3 (0%)	1/3 (33%)	2/3 (67%)	PAICS
Rapoport-Luebering Glycolytic Shunt	1.15	0.333	#NUM!	0/3 (0%)	0/3 (0%)	1/3 (33%)	2/3 (67%)	BPGM
NAD Salvage Pathway II	1.03	0.25	#NUM!	0/4 (0%)	0/4 (0%)	1/4 (25%)	3/4 (75%)	ACP6
Phospholipases	1.03	0.25	#NUM!	1/4 (25%)	0/4 (0%)	0/4 (0%)	3/4 (75%)	PDIA3
UDP-N-acetyl-D-galactosamine Biosynthesis II	1.03	0.25	#NUM!	1/4 (25%)	0/4 (0%)	0/4 (0%)	3/4 (75%)	HK2
Synaptic Long Term Potentiation	0.983	0.087	#NUM!	2/23 (9%)	0/23 (0%)	0/23 (0%)	21/23 (91%)	CAMK2D,PDIA3
Granzyme B Signaling	0.939	0.2	#NUM!	1/5 (20%)	0/5 (0%)	0/5 (0%)	4/5 (80%)	NUMA1
Glucose and Glucose-1-phosphate Degradation	0.939	0.2	#NUM!	1/5 (20%)	0/5 (0%)	0/5 (0%)	4/5 (80%)	HK2
GDP-glucose Biosynthesis	0.939	0.2	#NUM!	1/5 (20%)	0/5 (0%)	0/5 (0%)	4/5 (80%)	HK2
WNT/Ca+ pathway	0.939	0.2	#NUM!	1/5 (20%)	0/5 (0%)	0/5 (0%)	4/5 (80%)	PDIA3
CREB Signaling in Neurons	0.866	0.0741	#NUM!	2/27 (7%)	0/27 (0%)	0/27 (0%)	25/27 (93%)	CAMK2D,PDIA3
Vitamin-C Transport	0.866	0.167	#NUM!	0/6 (0%)	0/6 (0%)	1/6 (17%)	5/6 (83%)	GLRX
Antigen Presentation Pathway	0.866	0.167	#NUM!	1/6 (17%)	0/6 (0%)	0/6 (0%)	5/6 (83%)	PDIA3
Role of Macrophages, Fibroblasts and Endothelial Cells in Rheumatoid Arthritis	0.842	0.0714	#NUM!	2/28 (7%)	0/28 (0%)	0/28 (0%)	26/28 (93%)	CAMK2D,PDIA3
Role of NFAT in Cardiac Hypertrophy	0.842	0.0714	#NUM!	2/28 (7%)	0/28 (0%)	0/28 (0%)	26/28 (93%)	CAMK2D,PDIA3
Lipid Antigen Presentation by CD1	0.804	0.143	#NUM!	1/7 (14%)	0/7 (0%)	0/7 (0%)	6/7 (86%)	PDIA3
Purine Nucleotides De Novo Biosynthesis II	0.804	0.143	#NUM!	0/7 (0%)	0/7 (0%)	1/7 (14%)	6/7 (86%)	PAICS
ICOS-ICOSL Signaling in T Helper Cells	0.752	0.125	#NUM!	1/8 (13%)	0/8 (0%)	0/8 (0%)	7/8 (88%)	CAMK2D
HIF1α Signaling	0.728	0.0606	#NUM!	2/33 (6%)	0/33 (0%)	0/33 (0%)	31/33 (94%)	CAMK2D,HK2
Crosstalk between Dendritic Cells and Natural Killer Cells	0.706	0.111	#NUM!	1/9 (11%)	0/9 (0%)	0/9 (0%)	8/9 (89%)	CAMK2D
Thrombin Signaling	0.67	0.0556	#NUM!	2/36 (6%)	0/36 (0%)	0/36 (0%)	34/36 (94%)	CAMK2D,PDIA3
Adipogenesis pathway	0.664	0.1	#NUM!	1/10 (10%)	0/10 (0%)	0/10 (0%)	9/10 (90%)	Kat6b
Sphingosine-1-phosphate Signaling	0.627	0.0909	#NUM!	1/11 (9%)	0/11 (0%)	0/11 (0%)	10/11 (91%)	PDIA3
UVA-Induced MAPK Signaling	0.627	0.0909	#NUM!	1/11 (9%)	0/11 (0%)	0/11 (0%)	10/11 (91%)	PDIA3
Dendritic Cell Maturation	0.595	0.0833	#NUM!	1/12 (8%)	0/12 (0%)	0/12 (0%)	11/12 (92%)	PDIA3
GPCR-Mediated Integration of Enteroendocrine Signaling Exemplified by an L Cell	0.595	0.0833	#NUM!	1/12 (8%)	0/12 (0%)	0/12 (0%)	11/12 (92%)	PDIA3
GPCR-Mediated Nutrient Sensing in Enteroendocrine Cells	0.595	0.0833	#NUM!	1/12 (8%)	0/12 (0%)	0/12 (0%)	11/12 (92%)	PDIA3
Leptin Signaling in Obesity	0.565	0.0769	#NUM!	1/13 (8%)	0/13 (0%)	0/13 (0%)	12/13 (92%)	PDIA3
PKCθ Signaling in T Lymphocytes	0.538	0.0714	#NUM!	1/14 (7%)	0/14 (0%)	0/14 (0%)	13/14 (93%)	CAMK2D
Gluconeogenesis I	0.538	0.0714	#NUM!	0/14 (0%)	0/14 (0%)	1/14 (7%)	13/14 (93%)	BPGM
PFKFB4 Signaling Pathway	0.538	0.0714	#NUM!	1/14 (7%)	0/14 (0%)	0/14 (0%)	13/14 (93%)	HK2
Germ Cell-Sertoli Cell Junction Signaling	0.53	0.0444	#NUM!	1/45 (2%)	0/45 (0%)	1/45 (2%)	43/45 (96%)	JUP,SORBS1
Acute Myeloid Leukemia Signaling	0.513	0.0667	#NUM!	0/15 (0%)	0/15 (0%)	1/15 (7%)	14/15 (93%)	JUP
GM-CSF Signaling	0.513	0.0667	#NUM!	1/15 (7%)	0/15 (0%)	0/15 (0%)	14/15 (93%)	CAMK2D
Xenobiotic Metabolism Signaling	0.504	0.0426	#NUM!	2/47 (4%)	0/47 (0%)	0/47 (0%)	45/47 (96%)	CAMK2D,FTL
HMGB1 Signaling	0.489	0.0625	#NUM!	1/16 (6%)	0/16 (0%)	0/16 (0%)	15/16 (94%)	Kat6b
Glioma Signaling	0.489	0.0625	#NUM!	1/16 (6%)	0/16 (0%)	0/16 (0%)	15/16 (94%)	CAMK2D
Glycolysis I	0.489	0.0625	#NUM!	0/16 (0%)	0/16 (0%)	1/16 (6%)	15/16 (94%)	BPGM
Neuroinflammation Signaling Pathway	0.489	0.0625	#NUM!	0/16 (0%)	0/16 (0%)	1/16 (6%)	15/16 (94%)	MFGE8
Cardiac Hypertrophy Signaling (Enhanced)	0.48	0.0408	#NUM!	2/49 (4%)	0/49 (0%)	0/49 (0%)	47/49 (96%)	CAMK2D,PDIA3
Glioblastoma Multiforme Signaling	0.469	0.0588	#NUM!	1/17 (6%)	0/17 (0%)	0/17 (0%)	16/17 (94%)	PDIA3
Sertoli Cell-Sertoli Cell Junction Signaling	0.469	0.04	#NUM!	1/50 (2%)	0/50 (0%)	1/50 (2%)	48/50 (96%)	JUP,SORBS1
Synaptogenesis Signaling Pathway	0.457	0.0392	#NUM!	2/51 (4%)	0/51 (0%)	0/51 (0%)	49/51 (96%)	CAMK2D,STX16
Chemokine Signaling	0.449	0.0556	#NUM!	1/18 (6%)	0/18 (0%)	0/18 (0%)	17/18 (94%)	CAMK2D
cAMP-mediated signaling	0.449	0.0556	#NUM!	1/18 (6%)	0/18 (0%)	0/18 (0%)	17/18 (94%)	CAMK2D
Apelin Cardiomyocyte Signaling Pathway	0.449	0.0556	#NUM!	1/18 (6%)	0/18 (0%)	0/18 (0%)	17/18 (94%)	PDIA3
Endothelin-1 Signaling	0.429	0.0526	#NUM!	1/19 (5%)	0/19 (0%)	0/19 (0%)	18/19 (95%)	PDIA3
tRNA Charging	0.429	0.0526	#NUM!	0/19 (0%)	0/19 (0%)	1/19 (5%)	18/19 (95%)	Qars
Regulation Of The Epithelial Mesenchymal Transition By Growth Factors Pathway	0.429	0.0526	#NUM!	1/19 (5%)	0/19 (0%)	0/19 (0%)	18/19 (95%)	DOCK10
NRF2-mediated Oxidative Stress Response	0.425	0.037	#NUM!	1/54 (2%)	0/54 (0%)	1/54 (2%)	52/54 (96%)	FTL,USP14
P2Y Purigenic Receptor Signaling Pathway	0.412	0.05	#NUM!	1/20 (5%)	0/20 (0%)	0/20 (0%)	19/20 (95%)	PDIA3
Sperm Motility	0.412	0.05	#NUM!	1/20 (5%)	0/20 (0%)	0/20 (0%)	19/20 (95%)	PDIA3
Xenobiotic Metabolism General Signaling Pathway	0.412	0.05	#NUM!	1/20 (5%)	0/20 (0%)	0/20 (0%)	19/20 (95%)	FTL
Endocannabinoid Neuronal Synapse Pathway	0.396	0.0476	#NUM!	1/21 (5%)	0/21 (0%)	0/21 (0%)	20/21 (95%)	PDIA3
Synaptic Long Term Depression	0.38	0.0455	#NUM!	1/22 (5%)	0/22 (0%)	0/22 (0%)	21/22 (95%)	PDIA3
Iron homeostasis signaling pathway	0.38	0.0455	#NUM!	1/22 (5%)	0/22 (0%)	0/22 (0%)	21/22 (95%)	FTL
GNRH Signaling	0.352	0.0417	#NUM!	1/24 (4%)	0/24 (0%)	0/24 (0%)	23/24 (96%)	CAMK2D
Dopamine-DARPP32 Feedback in cAMP Signaling	0.352	0.0417	#NUM!	1/24 (4%)	0/24 (0%)	0/24 (0%)	23/24 (96%)	PDIA3
G-Protein Coupled Receptor Signaling	0.339	0.04	#NUM!	1/25 (4%)	0/25 (0%)	0/25 (0%)	24/25 (96%)	CAMK2D
Reelin Signaling in Neurons	0.326	0.0385	#NUM!	1/26 (4%)	0/26 (0%)	0/26 (0%)	25/26 (96%)	CAMK2D
Necroptosis Signaling Pathway	0.314	0.037	#NUM!	1/27 (4%)	0/27 (0%)	0/27 (0%)	26/27 (96%)	CAMK2D
Ferroptosis Signaling Pathway	0.304	0.0357	#NUM!	1/28 (4%)	0/28 (0%)	0/28 (0%)	27/28 (96%)	FTL
Huntington's Disease Signaling	0.293	0.0286	#NUM!	2/70 (3%)	0/70 (0%)	0/70 (0%)	68/70 (97%)	PSMA2,STX16
Protein Kinase A Signaling	0.293	0.0286	#NUM!	2/70 (3%)	0/70 (0%)	0/70 (0%)	68/70 (97%)	CAMK2D,PDIA3
p70S6K Signaling	0.292	0.0345	#NUM!	1/29 (3%)	0/29 (0%)	0/29 (0%)	28/29 (97%)	PDIA3
Adrenomedullin signaling pathway	0.292	0.0345	#NUM!	1/29 (3%)	0/29 (0%)	0/29 (0%)	28/29 (97%)	PDIA3
14-3-3-mediated Signaling	0.282	0.0333	#NUM!	1/30 (3%)	0/30 (0%)	0/30 (0%)	29/30 (97%)	PDIA3
Protein Ubiquitination Pathway	0.281	0.0278	#NUM!	1/72 (1%)	0/72 (0%)	1/72 (1%)	70/72 (97%)	PSMA2,USP14
Aldosterone Signaling in Epithelial Cells	0.273	0.0323	#NUM!	1/31 (3%)	0/31 (0%)	0/31 (0%)	30/31 (97%)	PDIA3
Polyamine Regulation in Colon Cancer	0.246	0.0294	#NUM!	1/34 (3%)	0/34 (0%)	0/34 (0%)	33/34 (97%)	PSMA2
B Cell Receptor Signaling	0.246	0.0294	#NUM!	1/34 (3%)	0/34 (0%)	0/34 (0%)	33/34 (97%)	CAMK2D
FAT10 Signaling Pathway	0.246	0.0294	#NUM!	1/34 (3%)	0/34 (0%)	0/34 (0%)	33/34 (97%)	PSMA2
Phagosome Maturation	0.239	0.0286	#NUM!	1/35 (3%)	0/35 (0%)	0/35 (0%)	34/35 (97%)	STX16
Ephrin Receptor Signaling	0.239	0.0286	#NUM!	1/35 (3%)	0/35 (0%)	0/35 (0%)	34/35 (97%)	SORBS1
Opioid Signaling Pathway	0.231	0.0278	#NUM!	1/36 (3%)	0/36 (0%)	0/36 (0%)	35/36 (97%)	CAMK2D
Cellular Effects of Sildenafil (Viagra)	0.216	0.0263	#NUM!	1/38 (3%)	0/38 (0%)	0/38 (0%)	37/38 (97%)	PDIA3
Xenobiotic Metabolism PXR Signaling Pathway	0.216	0.0263	#NUM!	1/38 (3%)	0/38 (0%)	0/38 (0%)	37/38 (97%)	CAMK2D
PPARα/RXRα Activation	0.21	0.0256	#NUM!	1/39 (3%)	0/39 (0%)	0/39 (0%)	38/39 (97%)	PDIA3
Cardiac Hypertrophy Signaling	0.203	0.025	#NUM!	1/40 (3%)	0/40 (0%)	0/40 (0%)	39/40 (98%)	PDIA3
Gap Junction Signaling	0.203	0.025	#NUM!	1/40 (3%)	0/40 (0%)	0/40 (0%)	39/40 (98%)	PDIA3
Breast Cancer Regulation by Stathmin1	0.197	0.0244	#NUM!	1/41 (2%)	0/41 (0%)	0/41 (0%)	40/41 (98%)	CAMK2D
Dilated Cardiomyopathy Signaling Pathway	0	0.02	#NUM!	1/50 (2%)	0/50 (0%)	0/50 (0%)	49/50 (98%)	CAMK2D
Axonal Guidance Signaling	0	0.0133	#NUM!	1/75 (1%)	0/75 (0%)	0/75 (0%)	74/75 (99%)	PDIA3
Acute Phase Response Signaling	0	0.0233	#NUM!	1/43 (2%)	0/43 (0%)	0/43 (0%)	42/43 (98%)	FTL
Tight Junction Signaling	0	0.0213	#NUM!	1/47 (2%)	0/47 (0%)	0/47 (0%)	46/47 (98%)	STX16
Molecular Mechanisms of Cancer	0	0.0222	#NUM!	1/45 (2%)	0/45 (0%)	0/45 (0%)	44/45 (98%)	CAMK2D
mTOR Signaling	0	0.0164	#NUM!	1/61 (2%)	0/61 (0%)	0/61 (0%)	60/61 (98%)	EIF4B
Estrogen Receptor Signaling	0	0.0101	#NUM!	1/99 (1%)	0/99 (0%)	0/99 (0%)	98/99 (99%)	PDIA3
Sirtuin Signaling Pathway	0	0.0187	#NUM!	0/107 (0%)	0/107 (0%)	2/107 (2%)	105/107 (98%)	BPGM,NDRG1
BAG2 Signaling Pathway	0	0.0217	#NUM!	1/46 (2%)	0/46 (0%)	0/46 (0%)	45/46 (98%)	PSMA2
Inhibition of ARE-Mediated mRNA Degradation Pathway	0	0.0179	#NUM!	1/56 (2%)	0/56 (0%)	0/56 (0%)	55/56 (98%)	PSMA2
Hepatic Fibrosis Signaling Pathway	0	0.0179	#NUM!	1/56 (2%)	0/56 (0%)	0/56 (0%)	55/56 (98%)	FTL
Calcium Signaling	0	0.0208	#NUM!	1/48 (2%)	0/48 (0%)	0/48 (0%)	47/48 (98%)	CAMK2D

## Sheet: Cellular Functions
© 2000-2021 QIAGEN. All rights reserved.
Categories	Functions	Diseases or Functions Annotation	p-value	B-H p-value	Predicted Activation State	Activation z-score	Molecules	# Molecules
Cell Morphology	permeabilization	Permeabilization of mitochondrial outer membrane	0.00167	0.242			BCL2L13,PDIA3	2
Cell Morphology	permeabilization	Permeabilization of mitochondria	0.00187	0.242			BCL2L13,HK2,PDIA3	3
Nervous System Development and Function,Organ Morphology,Tissue Morphology	quantity	Quantity of cerebral cortex cells	0.00329	0.242			CAMK2D,Kat6b	2
Inflammatory Response	degranulation	Degranulation of lysosome	0.0054	0.242			CORO1B,GLRX	2
Developmental Disorder,Hereditary Disorder,Metabolic Disease,Organismal Injury and Abnormalities,Renal and Urological Disease	inborn error renal tubular transport	Inborn error renal tubular transport	0.0054	0.242			CA3,STX16	2
Cellular Assembly and Organization,Cellular Function and Maintenance	formation	Formation of asters	0.00798	0.242			GLRX,NUMA1	2
Cell-To-Cell Signaling and Interaction,Nervous System Development and Function	miniature excitatory postsynaptic currents	Miniature excitatory postsynaptic currents	0.011	0.242			ATAD1,CAPRIN1	2
Infectious Diseases,Neurological Disease,Organismal Injury and Abnormalities,Psychological Disorders	prion disease	Prion disease	0.0144	0.242			MFGE8,PDIA3	2
Cardiovascular System Development and Function,Organ Morphology,Organismal Development	size	Size of heart ventricle	0.0183	0.242			JUP,NEXN	2
Cell Morphology,Connective Tissue Development and Function	shape change	Shape change of fibroblast cell lines	0.0206	0.242			CD151,CORO1B,SORBS1	3
Protein Synthesis	translation	Termination of translation of protein	0.0229	0.242			MRPL10,MRPS28,UPF1	3
Dermatological Diseases and Conditions,Hair and Skin Development and Function,Organ Morphology,Organismal Injury and Abnormalities	lack	Lack of stratum corneum	0.0241	0.242			JUP	1
Amino Acid Metabolism,Molecular Transport,Small Molecule Biochemistry	transport	Transport of L-serine	0.0241	0.242			SFXN1	1
Cellular Compromise	fragmentation	Fragmentation of spindle pole	0.0241	0.242			NUMA1	1
Cellular Assembly and Organization,Cellular Compromise,Cellular Function and Maintenance	disappearance	Disappearance of astral microtubules	0.0241	0.242			NDRG1	1
Hereditary Disorder,Neurological Disease,Organismal Injury and Abnormalities,Skeletal and Muscular Disorders	Charcot-Marie-Tooth disease type 4D	Charcot-Marie-Tooth disease type 4D	0.0241	0.242			NDRG1	1
Cell Death and Survival	apoptosis	Delay in apoptosis of leukemia cell lines	0.0241	0.242			MSRB2	1
Cell Cycle	Gap 0-Gap 1 phase	Arrest in Gap 0-Gap 1 phase of breast cancer cell lines	0.0241	0.242			USP14	1
Cell Cycle	mitosis	Arrest in mitosis of carcinoma cell lines	0.0241	0.242			NUMA1	1
Inflammatory Response,Organismal Injury and Abnormalities,Reproductive System Disease	inflammation	Inflammation of mammary gland	0.0241	0.242			MFGE8	1
Carbohydrate Metabolism,Nucleic Acid Metabolism,Small Molecule Biochemistry	synthesis	Synthesis of CMP-sialic acid	0.0241	0.242			CMAS	1
Cancer,Cell-To-Cell Signaling and Interaction,Organismal Injury and Abnormalities	binding	Binding of adenocarcinoma cells	0.0241	0.242			PDIA3	1
Auditory Disease,Hereditary Disorder,Neurological Disease,Organismal Injury and Abnormalities	autosomal recessive deafness type 63	Autosomal recessive deafness type 63	0.0241	0.242			NUMA1	1
Connective Tissue Disorders,Developmental Disorder,Hematological Disease,Hereditary Disorder,Metabolic Disease,Organismal Injury and Abnormalities	bisphosphoglycerate mutase deficiency	Bisphosphoglycerate mutase deficiency	0.0241	0.242			BPGM	1
Cell Morphology,Organ Morphology,Organismal Development,Organismal Injury and Abnormalities,Renal and Urological Disease,Renal and Urological System Development and Function	lack	Lack of pedicels	0.0241	0.242			CD151	1
Connective Tissue Disorders,Dermatological Diseases and Conditions,Developmental Disorder,Hereditary Disorder,Immunological Disease,Inflammatory Disease,Inflammatory Response,Organismal Injury and Abnormalities,Renal and Urological Disease	nephropathy with pretibal epidermolysis bullosa and deafness	Nephropathy with pretibal epidermolysis bullosa and deafness	0.0241	0.242			CD151	1
Hereditary Disorder,Metabolic Disease,Organismal Injury and Abnormalities	combined oxidative phosphorylation deficiency 47	Combined oxidative phosphorylation deficiency 47	0.0241	0.242			MRPS28	1
Cancer,Cell Cycle	polyploidy	Polyploidy of colorectal cancer cell lines	0.0241	0.242			NDRG1	1
Cancer,Cellular Response to Therapeutics,Organismal Injury and Abnormalities,Reproductive System Disease	paclitaxel resistance	Paclitaxel resistance of breast cancer cell lines	0.0241	0.242			HK2	1
Hereditary Disorder,Immunological Disease,Neurological Disease,Organismal Injury and Abnormalities,Skeletal and Muscular Disorders	hereditary hyperekplexia type 4	Hereditary hyperekplexia type 4	0.0241	0.242			ATAD1	1
Cancer,Organismal Injury and Abnormalities,Renal and Urological Disease	tumorigenesis	Tumorigenesis of bladder carcinoma	0.0241	0.242			MFGE8	1
Cardiovascular Disease,Hereditary Disorder,Organismal Injury and Abnormalities,Skeletal and Muscular Disorders	familial hypertrophic cardiomyopathy type 20	Familial hypertrophic cardiomyopathy type 20	0.0241	0.242			NEXN	1
Cancer,Cell Death and Survival,Organismal Injury and Abnormalities,Tumor Morphology	apoptosis	Apoptosis of lung cancer cells	0.0241	0.242			NDRG1	1
Cardiovascular Disease,Cardiovascular System Development and Function,Hereditary Disorder,Organ Morphology,Organismal Development,Organismal Injury and Abnormalities,Skeletal and Muscular Disorders	dilated cardiomyopathy type 1CC	Dilated cardiomyopathy type 1CC	0.0241	0.242			NEXN	1
Cell Morphology	morphology	Morphology of bone cancer cell lines	0.0241	0.242			CORO1B	1
Drug Metabolism	linkage	Linkage of glutathione	0.0241	0.242			GLRX	1
Cell Morphology,Cell-To-Cell Signaling and Interaction,Cellular Assembly and Organization	lack	Lack of desmosomes	0.0241	0.242			JUP	1
Organismal Injury and Abnormalities,Tissue Morphology	abnormal morphology	Abnormal morphology of lens epithelium	0.0241	0.242			GLRX	1
Carbohydrate Metabolism,Small Molecule Biochemistry	catabolism	Catabolism of D-glucose	0.0241	0.242			HK2	1
Cell-To-Cell Signaling and Interaction,Cellular Assembly and Organization,Cellular Function and Maintenance	assembly	Assembly of cell-cell adherens junctions	0.0241	0.242			JUP	1
Cell Morphology,Cellular Function and Maintenance,Embryonic Development	autophagy	Autophagy of embryonic cells	0.0241	0.242			BCL2L13	1
Post-Translational Modification	sialylation	Sialylation of protein	0.0241	0.242			CMAS	1
Cell Morphology,Cellular Assembly and Organization	accumulation	Accumulation of milk fat globules	0.0241	0.242			MFGE8	1
Carbohydrate Metabolism,Small Molecule Biochemistry	phosphorylation	Phosphorylation of glucose-6-phosphate	0.0241	0.242			HK2	1
Inflammatory Disease,Organismal Injury and Abnormalities,Reproductive System Disease	granuloma of sperm	Granuloma of sperm	0.0241	0.242			MFGE8	1
Infectious Diseases	attachment	Attachment of hepatitis B virus	0.0241	0.242			FTL	1
Cell-To-Cell Signaling and Interaction	clustering	Clustering of sarcoma cell lines	0.0241	0.242			JUP	1
Infectious Diseases	release	Release of Influenza A virus	0.0241	0.242			ANXA6	1
Cell-To-Cell Signaling and Interaction	adhesion	Adhesion of skin cancer cell lines	0.0241	0.242			CD151	1
Cancer,Cell Cycle	polyploidy	Polyploidy of carcinoma cell lines	0.0241	0.242			NDRG1	1
Reproductive System Development and Function	composition	Composition of breast milk	0.0241	0.242			MFGE8	1
Cancer,Cellular Growth and Proliferation,Organismal Functions,Organismal Injury and Abnormalities,Tumor Morphology	inhibition	Inhibition of mammary tumor cells	0.0241	0.242			HK2	1
Cellular Assembly and Organization,Cellular Compromise	disruption	Disruption of spindle pole	0.0241	0.242			NUMA1	1
Embryonic Development,Organismal Development,Tissue Morphology	size	Size of cortical plate	0.0241	0.242			Kat6b	1
Dermatological Diseases and Conditions,Organismal Injury and Abnormalities	acantholysis	Acantholysis	0.0241	0.242			JUP	1
Nervous System Development and Function,Organ Morphology,Tissue Morphology	quantity	Quantity of pyramidal neurons	0.0241	0.242			Kat6b	1
Cellular Assembly and Organization	binding	Binding of mitochondria	0.0241	0.242			HK2	1
Cancer,Cardiovascular Disease,Hereditary Disorder,Neurological Disease,Organismal Injury and Abnormalities	fibrosis, neurodegeneration and cerebral angiomatosis	Fibrosis, neurodegeneration and cerebral angiomatosis	0.0241	0.242			NHLRC2	1
Hair and Skin Development and Function,Organ Morphology	length	Length of hair	0.0241	0.242			JUP	1
Cardiovascular Disease,Organismal Injury and Abnormalities	spontaneous ventricular tachycardia	Spontaneous ventricular tachycardia	0.0241	0.242			JUP	1
Cell Cycle,DNA Replication, Recombination, and Repair	cross-linkage	Cross-linkage of DNA	0.0241	0.242			PDIA3	1
Cellular Development	differentiation	Differentiation of colorectal cancer cell lines	0.0241	0.242			NDRG1	1
Cancer,Gastrointestinal Disease,Organismal Injury and Abnormalities	mucoepidermoid carcinoma of parotid gland	Mucoepidermoid carcinoma of parotid gland	0.0241	0.242			NDRG1	1
Cellular Compromise	acidification	Acidification by hepatoma cell lines	0.0241	0.242			CA3	1
Endocrine System Disorders,Organismal Injury and Abnormalities,Reproductive System Disease,Tissue Morphology	degeneration	Degeneration of epididymal epithelium	0.0241	0.242			MFGE8	1
Organ Morphology,Reproductive System Development and Function	remodeling	Remodeling of mammary gland	0.0241	0.242			MFGE8	1
Cancer,Cell Cycle,Organismal Injury and Abnormalities	G2/M phase	Arrest in G2/M phase of glioma cells	0.0241	0.242			NDRG1	1
Developmental Disorder,Hereditary Disorder,Metabolic Disease,Organismal Injury and Abnormalities,Renal and Urological Disease	autosomal dominant pseudohypoaldosteronism type I	Autosomal dominant pseudohypoaldosteronism type I	0.0241	0.242			STX16	1
Post-Translational Modification,Protein Folding	misfolding	Misfolding of protein	0.0241	0.242			PDIA3	1
Hereditary Disorder,Neurological Disease,Organismal Injury and Abnormalities,Psychological Disorders	neurodegeneration with brain iron accumulation 3	Neurodegeneration with brain iron accumulation 3	0.0241	0.242			FTL	1
Cell Cycle	anaphase	Delay in initiation of anaphase	0.0241	0.242			NUMA1	1
Cellular Assembly and Organization,Cellular Compromise	formation	Formation of ferritin inclusion body	0.0241	0.242			FTL	1
Cardiovascular System Development and Function,Organ Morphology,Organismal Development	volume	Volume of right ventricle	0.0241	0.242			JUP	1
Cancer,Cell Cycle,Renal and Urological Disease	polyploidy	Polyploidy of bladder cancer cell lines	0.0241	0.242			NDRG1	1
Developmental Disorder,Hematological Disease,Hereditary Disorder,Metabolic Disease,Organismal Injury and Abnormalities	non-ketotic hyperglycinemia	Non-ketotic hyperglycinemia	0.0241	0.242			GCSH	1
Carbohydrate Metabolism,Small Molecule Biochemistry	phosphorylation	Phosphorylation of D-glucose	0.0241	0.242			HK2	1
Cardiovascular System Development and Function,Organ Development	function	Function of right ventricle	0.0241	0.242			JUP	1
Amino Acid Metabolism,Molecular Transport,Small Molecule Biochemistry	transport	Transport of D-serine	0.0241	0.242			SFXN1	1
Cancer,Neurological Disease,Organismal Injury and Abnormalities	growth	Growth of glioblastoma	0.0241	0.242			BCL2L13	1
Developmental Disorder,Hereditary Disorder,Metabolic Disease,Organismal Injury and Abnormalities	autosomal recessive L-ferritin deficiency	Autosomal recessive L-ferritin deficiency	0.0241	0.242			FTL	1
Nervous System Development and Function,Organ Morphology,Tissue Morphology	quantity	Quantity of place cells	0.0241	0.242			CAMK2D	1
Cellular Development,Embryonic Development,Organismal Development,Tissue Development	differentiation	Differentiation of ear mesenchymal stem cells	0.0241	0.242			BCL2L13	1
Cell Cycle	cell division	Arrest in cell division	0.0241	0.242			NUMA1	1
Humoral Immune Response,Protein Synthesis	production	Production of autoantibody	0.0241	0.242			MFGE8	1
Inflammatory Disease	mastitis	Mastitis	0.0241	0.242			MFGE8	1
Developmental Disorder,Hereditary Disorder,Metabolic Disease,Organismal Injury and Abnormalities	autosomal dominant L-ferritin deficiency	Autosomal dominant L-ferritin deficiency	0.0241	0.242			FTL	1
Cellular Assembly and Organization,DNA Replication, Recombination, and Repair	formation	Formation of spindle fibers	0.0241	0.242			NDRG1	1
Neurological Disease	neurodegeneration	Neurodegeneration of sciatic nerve	0.0241	0.242			NDRG1	1
Cancer,Organismal Injury and Abnormalities	metastasis	Metastasis of skin cancer cell lines	0.0241	0.242			CD151	1
Organ Morphology,Organismal Development,Organismal Injury and Abnormalities,Renal and Urological Disease,Renal and Urological System Development and Function	formation	Formation of synechia in renal glomerulus	0.0241	0.242			CD151	1
Cell Morphology,Organ Morphology,Organismal Development,Organismal Injury and Abnormalities,Renal and Urological Disease,Renal and Urological System Development and Function	lack	Lack of podocyte slit diaphragm	0.0241	0.242			CD151	1
Cardiovascular System Development and Function,Embryonic Development,Hematological System Development and Function,Lymphoid Tissue Structure and Development,Nervous System Development and Function,Organ Development,Organismal Development,Tissue Development,Visual System Development and Function	lymphangiogenesis	Lymphangiogenesis of cornea	0.0241	0.242			HK2	1
Cell Morphology	mitochondrial membrane permeabilization	Mitochondrial membrane permeabilization of mitochondrial outer membrane	0.0241	0.242			BCL2L13	1
Amino Acid Metabolism,Post-Translational Modification,Small Molecule Biochemistry	deglutathionylation	Deglutathionylation of L-cysteine	0.0241	0.242			GLRX	1
Cardiovascular System Development and Function,Tissue Morphology	permeability	Permeability of blood vessel tissue	0.0241	0.242			MFGE8	1
Cell Cycle	chromosome separation	Chromosome separation	0.0241	0.242			NUMA1	1
Organismal Injury and Abnormalities,Reproductive System Disease	collapse	Delay in collapse of mammary alveolus	0.0241	0.242			MFGE8	1
Cellular Movement	chemotaxis	Chemotaxis of skin cancer cell lines	0.0241	0.242			CD151	1
Cell Cycle	mitosis	Arrest in mitosis of lung cancer cell lines	0.0241	0.242			NUMA1	1
Cell Morphology,Cellular Compromise	loss	Loss of filopodia	0.0241	0.242			NHLRC2	1
Organismal Injury and Abnormalities,Reproductive System Disease	pathological dilation	Pathological dilation of mammary duct	0.0241	0.242			MFGE8	1
Developmental Disorder,Hematological Disease,Hereditary Disorder,Ophthalmic Disease,Organismal Injury and Abnormalities	hereditary hyperferritinemia cataract syndrome	Hereditary hyperferritinemia cataract syndrome	0.0241	0.242			FTL	1
Cell-To-Cell Signaling and Interaction	duration	Duration of focal adhesions	0.0241	0.242			CD151	1
Lipid Metabolism,Small Molecule Biochemistry	metabolism	Metabolism of lysobisphosphatidic acid	0.0241	0.242			ACP6	1
Cell Cycle	cleavage	Arrest in cleavage of cells	0.0241	0.242			NUMA1	1
Cardiovascular Disease,Organismal Injury and Abnormalities	sporadic abdominal aortic aneurysm	Sporadic abdominal aortic aneurysm	0.0241	0.242			FTL	1
Cell-To-Cell Signaling and Interaction	clustering	Clustering of bone cancer cell lines	0.0241	0.242			JUP	1
Cancer,Endocrine System Disorders,Gastrointestinal Disease,Organismal Injury and Abnormalities	adenosquamous pancreatic carcinoma	Adenosquamous pancreatic carcinoma	0.0241	0.242			UPF1	1
Amino Acid Metabolism,Molecular Transport,Small Molecule Biochemistry	transport	Transport of cystine	0.0241	0.242			UPF1	1
Cellular Movement,Hematological System Development and Function,Immune Cell Trafficking,Inflammatory Response	transendothelial migration	Transendothelial migration of peripheral blood neutrophils	0.0241	0.242			CAMK2D	1
Cardiovascular Disease,Hereditary Disorder,Organismal Injury and Abnormalities,Skeletal and Muscular Disorders	arrhythmogenic right ventricular dysplasia familial 12	Arrhythmogenic right ventricular dysplasia familial 12	0.0241	0.242			JUP	1
Cell Death and Survival	repopulation	Delay in initiation of repopulation of adipocytes	0.0241	0.242			MFGE8	1
Cellular Assembly and Organization,Cellular Function and Maintenance	aggregation	Aggregation of microtubules	0.0241	0.242			NUMA1	1
Amino Acid Metabolism,Post-Translational Modification,Small Molecule Biochemistry	decarboxylation	Decarboxylation of glycine	0.0241	0.242			GCSH	1
Cell Morphology,Cellular Development	branching	Branching of epithelial cell lines	0.0241	0.242			MFGE8	1
Cell Cycle,Reproductive System Development and Function	polyploidy	Polyploidy of mammary epithelial cells	0.0241	0.242			NDRG1	1
Cell-To-Cell Signaling and Interaction,Cellular Function and Maintenance,Hematological System Development and Function	phagocytosis	Phagocytosis of myeloid cells	0.0254	0.253			GLRX,MFGE8,NHLRC2	3
Post-Translational Modification,Protein Degradation	oxidation	Oxidation of protein	0.0271	0.267			FTL,MSRB2	2
Carbohydrate Metabolism,Molecular Transport	transport	Transport of monosaccharide	0.0307	0.273			HK2,SORBS1,STX16	3
Cell-To-Cell Signaling and Interaction,Cellular Function and Maintenance,Inflammatory Response	phagocytosis	Phagocytosis of phagocytes	0.0307	0.273			GLRX,MFGE8,NHLRC2	3
Carbohydrate Metabolism,Cellular Function and Maintenance,Molecular Transport,Small Molecule Biochemistry	import	Import of D-glucose	0.032	0.273			HK2,SORBS1	2
Cell-To-Cell Signaling and Interaction,Cellular Function and Maintenance,Hematological System Development and Function,Inflammatory Response	phagocytosis	Phagocytosis of leukocyte cell lines	0.032	0.273			CMAS,MFGE8	2
Cell Morphology,Cellular Assembly and Organization,Cellular Function and Maintenance	formation	Formation of autophagosomes	0.032	0.273			NDRG1,STX16	2
Ophthalmic Disease,Organismal Injury and Abnormalities	cataract disease	Cataract disease	0.0365	0.273			FTL,NDRG1,SFXN1	3
Cell Death and Survival,Nervous System Development and Function	cell viability	Cell viability of neurons	0.0396	0.273			HK2,PDIA3,UPF1	3
Cell-To-Cell Signaling and Interaction,Cellular Assembly and Organization	quantity	Quantity of intercellular junctions	0.0429	0.273			CAMK2D,JUP	2
Connective Tissue Disorders,Immunological Disease,Inflammatory Disease,Inflammatory Response,Organismal Injury and Abnormalities,Skeletal and Muscular Disorders	rheumatoid arthritis	Early stage rheumatoid arthritis	0.0429	0.273			MRPS28,PDIA3	2
Cardiovascular System Development and Function,Tissue Morphology	permeability	Permeability of vasculature	0.0429	0.273			CAMK2D,CD151,MFGE8	3
Cancer,Organismal Injury and Abnormalities,Reproductive System Disease	neoplasia	Neoplasia of breast cancer cell lines	0.0462	0.273			CD151,JUP,MFGE8	3
Amino Acid Metabolism,Small Molecule Biochemistry	catabolism	Catabolism of glycine	0.0476	0.273			GCSH	1
Cardiovascular System Development and Function,Cellular Development,Cellular Function and Maintenance,Cellular Growth and Proliferation,Organismal Development,Tissue Development	angiogenesis	Angiogenesis of vascular endothelial cells	0.0476	0.273			CD151	1
Cell Death and Survival	anoikis	Anoikis of adenocarcinoma cell lines	0.0476	0.273			NDRG1	1
Cell Morphology,Cellular Development,Reproductive System Development and Function	branching	Branching of breast cell lines	0.0476	0.273			MFGE8	1
Cellular Function and Maintenance,Molecular Transport,Small Molecule Biochemistry	quantity	Quantity of phosphate	0.0476	0.273			ANXA6	1
Cellular Development,Cellular Growth and Proliferation,Connective Tissue Development and Function,Hematological System Development and Function,Hematopoiesis,Lymphoid Tissue Structure and Development,Organismal Development,Skeletal and Muscular System Development and Function,Tissue Development	osteoclastogenesis	Osteoclastogenesis of peripheral blood monocytes	0.0476	0.273			MFGE8	1
Cardiovascular Disease,Organismal Injury and Abnormalities	heart failure	Severe heart failure	0.0476	0.273			CAMK2D	1
Cell Death and Survival,Organismal Injury and Abnormalities	apoptosis	Apoptosis of squamous epithelial cells	0.0476	0.273			NDRG1	1
Cell-To-Cell Signaling and Interaction	adhesion	Adhesion of Neisseria lactamica NL1009	0.0476	0.273			CD151	1
Connective Tissue Development and Function,Skeletal and Muscular System Development and Function	resorptive capacity	Resorptive capacity of osteoclasts	0.0476	0.273			MFGE8	1
Small Molecule Biochemistry	quantity	Quantity of hydroxyproline	0.0476	0.273			GLRX	1
Tissue Morphology	quantity	Quantity of extracellular matrix	0.0476	0.273			JUP	1
Cell Morphology,Connective Tissue Development and Function	ruffling	Ruffling of fibroblast cell lines	0.0476	0.273			CORO1B	1
Cardiovascular Disease,Hematological Disease,Organismal Injury and Abnormalities	thrombosis	Thrombosis of atrium	0.0476	0.273			JUP	1
Cell Morphology,Cellular Function and Maintenance	autophagy	Autophagy of stem cells	0.0476	0.273			BCL2L13	1
Cell Death and Survival	anoikis	Anoikis of prostate cancer cell lines	0.0476	0.273			NDRG1	1
Embryonic Development,Organ Development,Organ Morphology,Organismal Development,Reproductive System Development and Function,Tissue Development	branching morphogenesis	Branching morphogenesis of mammary duct	0.0476	0.273			MFGE8	1
Cell-To-Cell Signaling and Interaction	adhesion	Adhesion of Streptococcus pneumoniae D39	0.0476	0.273			CD151	1
Connective Tissue Disorders,Inflammatory Disease,Inflammatory Response,Organismal Injury and Abnormalities,Skeletal and Muscular Disorders	pigmented villonodular synovitis	Pigmented villonodular synovitis	0.0476	0.273			FTL	1
Cardiovascular Disease,Developmental Disorder,Organismal Injury and Abnormalities	ectopia	Ectopia of heart ventricle	0.0476	0.273			JUP	1
Cell-To-Cell Signaling and Interaction	binding	Binding of RPE cells	0.0476	0.273			MFGE8	1
Carbohydrate Metabolism,Molecular Transport,Small Molecule Biochemistry	quantity	Quantity of glucose-6-phosphate	0.0476	0.273			HK2	1
Cell Death and Survival,Cellular Function and Maintenance	colony survival	Colony survival of carcinoma cell lines	0.0476	0.273			HK2	1
Skeletal and Muscular Disorders	torticollis	Torticollis	0.0476	0.273			FTL	1
Infectious Diseases	production	Production of Influenza A virus	0.0476	0.273			ANXA6	1
Lymphoid Tissue Structure and Development,Tissue Morphology	abnormal quantity	Abnormal quantity of bone marrow cells	0.0476	0.273			CD151	1
Post-Translational Modification	repair	Repair of protein	0.0476	0.273			MSRB2	1
Developmental Disorder,Neurological Disease,Ophthalmic Disease,Organismal Injury and Abnormalities	cortical visual impairment and intellectual disability	Cortical visual impairment and intellectual disability	0.0476	0.273			ACP6	1
Cell-To-Cell Signaling and Interaction,Cellular Assembly and Organization,Cellular Function and Maintenance	formation	Formation of desmosomes	0.0476	0.273			JUP	1
Cell Morphology,Cellular Assembly and Organization,Cellular Development,Cellular Function and Maintenance,Cellular Growth and Proliferation,Embryonic Development,Nervous System Development and Function,Organismal Development,Tissue Development,Tissue Morphology	size	Size of dendritic spines	0.0476	0.273			DOCK10	1
Lipid Metabolism,Molecular Transport,Small Molecule Biochemistry	distribution	Distribution of cholesterol	0.0476	0.273			ANXA6	1
Nervous System Development and Function	maximal conduction velocity	Maximal conduction velocity	0.0476	0.273			NDRG1	1
Cellular Compromise	injury	Injury of mitochondrial membrane	0.0476	0.273			HK2	1
Cellular Assembly and Organization	movement	Movement of chromosomes	0.0476	0.273			NUMA1	1
Cardiovascular System Development and Function,Hair and Skin Development and Function,Organismal Development	neovascularization	Neovascularization of skin	0.0476	0.273			MFGE8	1
Cardiovascular System Development and Function,Organismal Development	neovascularization	Neovascularization of limb	0.0476	0.273			MFGE8	1
Cell-To-Cell Signaling and Interaction	adhesion	Adhesion of Neisseria meningitidis strain MC58 C13 derivative	0.0476	0.273			CD151	1
Cellular Development,Connective Tissue Development and Function,Skeletal and Muscular System Development and Function,Tissue Development	differentiation	Delay in differentiation of chondrocytes	0.0476	0.273			ANXA6	1
Post-Translational Modification	lipoylation	Lipoylation of protein	0.0476	0.273			GCSH	1
Cell-To-Cell Signaling and Interaction	binding	Binding of Escherichia coli 25922	0.0476	0.273			CD151	1
Cellular Movement,Hematological System Development and Function,Immune Cell Trafficking,Inflammatory Response	transendothelial migration	Transendothelial migration of peripheral blood monocytes	0.0476	0.273			CAMK2D	1
Cell-To-Cell Signaling and Interaction,Cellular Function and Maintenance,Inflammatory Response,Nervous System Development and Function	phagocytosis	Phagocytosis of neurons	0.0476	0.273			MFGE8	1
Nucleic Acid Metabolism,Small Molecule Biochemistry	synthesis	Synthesis of purine base	0.0476	0.273			PAICS	1
Cell Death and Survival,Embryonic Development	cell viability	Cell viability of trophoblast cells	0.0476	0.273			NDRG1	1
Cancer,Neurological Disease,Organismal Injury and Abnormalities	astrocytoma	Astrocytoma in frontoparietal cortex of cerebrum	0.0476	0.273			ATAD1	1
Cardiovascular System Development and Function,Cell Morphology	morphology	Morphology of endothelial cell lines	0.0476	0.273			CD151	1
Hair and Skin Development and Function,Organ Development	growth	Growth of hair follicle	0.0476	0.273			JUP	1
Organ Morphology,Organismal Development,Organismal Injury and Abnormalities,Renal and Urological Disease,Renal and Urological System Development and Function	abnormal morphology	Abnormal morphology of dilated proximal convoluted tubule	0.0476	0.273			CD151	1
Cardiovascular Disease,Dermatological Diseases and Conditions,Hereditary Disorder,Organismal Injury and Abnormalities,Skeletal and Muscular Disorders	Naxos disease	Naxos disease	0.0476	0.273			JUP	1
Connective Tissue Development and Function,Connective Tissue Disorders,Digestive System Development and Function,Gastrointestinal Disease,Organ Morphology,Organismal Development,Organismal Injury and Abnormalities,Skeletal and Muscular Disorders,Skeletal and Muscular System Development and Function,Tissue Development,Tissue Morphology	alveolar bone loss	Alveolar bone loss	0.0476	0.273			MFGE8	1
Organ Morphology	thickening	Thickening of epidermis	0.0476	0.273			JUP	1
Dermatological Diseases and Conditions,Organ Morphology,Organismal Injury and Abnormalities	abnormal morphology	Abnormal morphology of stratum spinosum	0.0476	0.273			JUP	1
Cellular Function and Maintenance,Hematological System Development and Function,Humoral Immune Response	homeostasis	Homeostasis of B lymphocytes	0.0476	0.273			DOCK10	1
Neurological Disease	demyelination	Demyelination of sciatic nerve	0.0476	0.273			NDRG1	1
Cellular Function and Maintenance	respiration	Respiration of fibroblasts	0.0476	0.273			ANXA6	1
Cardiovascular System Development and Function,Cell Morphology,Skeletal and Muscular System Development and Function	relengthening	Relengthening of cardiomyocytes	0.0476	0.273			ANXA6	1
Lymphoid Tissue Structure and Development,Organ Morphology,Tissue Morphology	quantity	Quantity of white pulp	0.0476	0.273			MFGE8	1
Cell Morphology	polarization	Polarization of macrophage cancer cell lines	0.0476	0.273			USP14	1
Hair and Skin Development and Function	barrier function	Barrier function of skin	0.0476	0.273			JUP	1
Cell Death and Survival	killing	Killing of breast cancer cell lines	0.0476	0.273			GLRX	1
Small Molecule Biochemistry	cleavage	Cleavage of phosphate	0.0476	0.273			NUDT4	1
Cellular Movement	transendothelial migration	Transendothelial migration of melanoma cell lines	0.0476	0.273			CD151	1
Cellular Development,Cellular Growth and Proliferation	growth	Re-entry into growth of leukemia cell lines	0.0476	0.273			FTL	1
Cell-To-Cell Signaling and Interaction,Cellular Assembly and Organization	quantity	Quantity of desmosomes	0.0476	0.273			JUP	1
Gene Expression,RNA Post-Transcriptional Modification	binding	Binding of mRNA	0.0476	0.273			EIF4B	1
Dermatological Diseases and Conditions,Organ Morphology,Organismal Injury and Abnormalities	abnormal morphology	Abnormal morphology of granular layer of epidermis	0.0476	0.273			JUP	1
Cellular Development,Cellular Growth and Proliferation,Embryonic Development,Hematological System Development and Function,Hematopoiesis,Humoral Immune Response,Lymphoid Tissue Structure and Development,Organ Development,Organismal Development,Tissue Development	differentiation	Differentiation of marginal-zone B lymphocytes	0.0476	0.273			DOCK10	1
Cancer,Neurological Disease,Organismal Injury and Abnormalities	myxopapillary ependymoma	Myxopapillary ependymoma	0.0476	0.273			HK2	1
Carbohydrate Metabolism,Cellular Function and Maintenance,Molecular Transport,Small Molecule Biochemistry	transmembrane transport	Transmembrane transport of D-glucose	0.0476	0.273			HK2	1
Cell Death and Survival,Nervous System Development and Function	cell survival	Cell survival of cortical neurons	0.0476	0.273			UPF1	1
Cellular Function and Maintenance	retention	Retention of breast cancer cell lines	0.0476	0.273			CD151	1
Developmental Disorder,Endocrine System Disorders,Hematological Disease,Hereditary Disorder,Metabolic Disease,Organismal Injury and Abnormalities	pseudohypoparathyroidism type 1B	Pseudohypoparathyroidism type 1B	0.0476	0.273			STX16	1
Cell-To-Cell Signaling and Interaction,Cellular Assembly and Organization,Cellular Function and Maintenance,Inflammatory Response	phagocytosis	Phagocytosis of photoreceptor outer segments	0.0476	0.273			MFGE8	1
Cellular Movement	scattering	Scattering of breast cancer cell lines	0.0476	0.273			CD151	1
