# Supplementary material for: Alterations in cytoskeletal and Ca2+ cycling regulators in atria lacking the obscurin Ig58/59 module
Source: Front Cardiovasc Med. 2023 Apr 13;10:1085840. doi: 10.3389/fcvm.2023.1085840 (PMC10251194; doi:10.3389/fcvm.2023.1085840)
Supplement: Supplementary file 14 [file Data_Sheet_6.xls]

## Sheet: Pathways
© 2000-2021 QIAGEN. All rights reserved.
Ingenuity Canonical Pathways	-log(p-value)	Ratio	z-score	Downregulated	No change	Upregulated	No overlap with dataset	Molecules
Apelin Cardiomyocyte Signaling Pathway	1.82	0.25	#NUM!	3/12 (25%)	0/12 (0%)	0/12 (0%)	9/12 (75%)	ATP2A3,MYL7,SLC9A1
Neuroinflammation Signaling Pathway	1.55	0.333	#NUM!	2/6 (33%)	0/6 (0%)	0/6 (0%)	4/6 (67%)	KCNJ3,MAPT
Heparan Sulfate Biosynthesis	1.33	1	#NUM!	1/1 (100%)	0/1 (0%)	0/1 (0%)	0/1 (0%)	PNPLA7
Heparan Sulfate Biosynthesis (Late Stages)	1.33	1	#NUM!	1/1 (100%)	0/1 (0%)	0/1 (0%)	0/1 (0%)	PNPLA7
Triacylglycerol Degradation	1.33	1	#NUM!	1/1 (100%)	0/1 (0%)	0/1 (0%)	0/1 (0%)	PNPLA7
Reelin Signaling in Neurons	1.2	0.222	#NUM!	2/9 (22%)	0/9 (0%)	0/9 (0%)	7/9 (78%)	MAP1B,MAPT
RHOA Signaling	1.2	0.222	#NUM!	2/9 (22%)	0/9 (0%)	0/9 (0%)	7/9 (78%)	MYL7,TTN
Semaphorin Neuronal Repulsive Signaling Pathway	1.12	0.2	#NUM!	2/10 (20%)	0/10 (0%)	0/10 (0%)	8/10 (80%)	MAPT,MYL7
Actin Cytoskeleton Signaling	1.11	0.136	#NUM!	3/22 (14%)	0/22 (0%)	0/22 (0%)	19/22 (86%)	MYL7,SLC9A1,TTN
Signaling by Rho Family GTPases	0.979	0.167	#NUM!	2/12 (17%)	0/12 (0%)	0/12 (0%)	10/12 (83%)	MYL7,SLC9A1
Calcium-induced T Lymphocyte Apoptosis	0.87	0.333	#NUM!	1/3 (33%)	0/3 (0%)	0/3 (0%)	2/3 (67%)	ATP2A3
Calcium Transport I	0.87	0.333	#NUM!	1/3 (33%)	0/3 (0%)	0/3 (0%)	2/3 (67%)	ATP2A3
TEC Kinase Signaling	0.87	0.333	#NUM!	0/3 (0%)	0/3 (0%)	1/3 (33%)	2/3 (67%)	GTF2I
Integrin Signaling	0.863	0.143	#NUM!	2/14 (14%)	0/14 (0%)	0/14 (0%)	12/14 (86%)	MYL7,TTN
Dopamine-DARPP32 Feedback in cAMP Signaling	0.815	0.133	#NUM!	2/15 (13%)	0/15 (0%)	0/15 (0%)	13/15 (87%)	ATP2A3,KCNJ3
Regulation of Actin-based Motility by Rho	0.754	0.25	#NUM!	1/4 (25%)	0/4 (0%)	0/4 (0%)	3/4 (75%)	MYL7
Phagosome Formation	0.728	0.118	#NUM!	2/17 (12%)	0/17 (0%)	0/17 (0%)	15/17 (88%)	MYL7,TTN
Hepatic Fibrosis Signaling Pathway	0.688	0.111	#NUM!	2/18 (11%)	0/18 (0%)	0/18 (0%)	16/18 (89%)	MYL7,TTN
Gα12/13 Signaling	0.668	0.2	#NUM!	1/5 (20%)	0/5 (0%)	0/5 (0%)	4/5 (80%)	MYL7
Neuroprotective Role of THOP1 in Alzheimer's Disease	0.668	0.2	#NUM!	1/5 (20%)	0/5 (0%)	0/5 (0%)	4/5 (80%)	MAPT
p38 MAPK Signaling	0.668	0.2	#NUM!	1/5 (20%)	0/5 (0%)	0/5 (0%)	4/5 (80%)	MAPT
Cancer Drug Resistance By Drug Efflux	0.668	0.2	#NUM!	1/5 (20%)	0/5 (0%)	0/5 (0%)	4/5 (80%)	ABCC1
Hepatic Cholestasis	0.599	0.167	#NUM!	1/6 (17%)	0/6 (0%)	0/6 (0%)	5/6 (83%)	ABCC1
PAK Signaling	0.599	0.167	#NUM!	1/6 (17%)	0/6 (0%)	0/6 (0%)	5/6 (83%)	MYL7
Synaptogenesis Signaling Pathway	0.558	0.0909	#NUM!	2/22 (9%)	0/22 (0%)	0/22 (0%)	20/22 (91%)	MAP1B,MAPT
Calcium Signaling	0.558	0.0909	#NUM!	2/22 (9%)	0/22 (0%)	0/22 (0%)	20/22 (91%)	ATP2A3,MYL7
CDC42 Signaling	0.542	0.143	#NUM!	1/7 (14%)	0/7 (0%)	0/7 (0%)	6/7 (86%)	MYL7
Amyloid Processing	0.542	0.143	#NUM!	1/7 (14%)	0/7 (0%)	0/7 (0%)	6/7 (86%)	MAPT
Xenobiotic Metabolism CAR Signaling Pathway	0.542	0.143	#NUM!	1/7 (14%)	0/7 (0%)	0/7 (0%)	6/7 (86%)	ABCC1
IL-8 Signaling	0.493	0.125	#NUM!	1/8 (13%)	0/8 (0%)	0/8 (0%)	7/8 (88%)	MYL7
CXCR4 Signaling	0.493	0.125	#NUM!	1/8 (13%)	0/8 (0%)	0/8 (0%)	7/8 (88%)	MYL7
p70S6K Signaling	0.493	0.125	#NUM!	1/8 (13%)	0/8 (0%)	0/8 (0%)	7/8 (88%)	MAPT
Agranulocyte Adhesion and Diapedesis	0.493	0.125	#NUM!	1/8 (13%)	0/8 (0%)	0/8 (0%)	7/8 (88%)	MYL7
Hepatic Fibrosis / Hepatic Stellate Cell Activation	0.451	0.111	#NUM!	1/9 (11%)	0/9 (0%)	0/9 (0%)	8/9 (89%)	MYL7
BAG2 Signaling Pathway	0.451	0.111	#NUM!	1/9 (11%)	0/9 (0%)	0/9 (0%)	8/9 (89%)	MAPT
NRF2-mediated Oxidative Stress Response	0.415	0.1	#NUM!	1/10 (10%)	0/10 (0%)	0/10 (0%)	9/10 (90%)	ABCC1
14-3-3-mediated Signaling	0.415	0.1	#NUM!	1/10 (10%)	0/10 (0%)	0/10 (0%)	9/10 (90%)	MAPT
Dilated Cardiomyopathy Signaling Pathway	0.397	0.069	#NUM!	2/29 (7%)	0/29 (0%)	0/29 (0%)	27/29 (93%)	MYL7,TTN
G Beta Gamma Signaling	0.383	0.0909	#NUM!	1/11 (9%)	0/11 (0%)	0/11 (0%)	10/11 (91%)	KCNJ3
Endocannabinoid Neuronal Synapse Pathway	0.383	0.0909	#NUM!	1/11 (9%)	0/11 (0%)	0/11 (0%)	10/11 (91%)	KCNJ3
CDK5 Signaling	0.355	0.0833	#NUM!	1/12 (8%)	0/12 (0%)	0/12 (0%)	11/12 (92%)	MAPT
Epithelial Adherens Junction Signaling	0.355	0.0833	#NUM!	1/12 (8%)	0/12 (0%)	0/12 (0%)	11/12 (92%)	MYL7
Aldosterone Signaling in Epithelial Cells	0.329	0.0769	#NUM!	1/13 (8%)	0/13 (0%)	0/13 (0%)	12/13 (92%)	SLC9A1
RHOGDI Signaling	0.329	0.0769	#NUM!	1/13 (8%)	0/13 (0%)	0/13 (0%)	12/13 (92%)	MYL7
Phospholipase C Signaling	0.305	0.0714	#NUM!	1/14 (7%)	0/14 (0%)	0/14 (0%)	13/14 (93%)	MYL7
Nitric Oxide Signaling in the Cardiovascular System	0.305	0.0714	#NUM!	1/14 (7%)	0/14 (0%)	0/14 (0%)	13/14 (93%)	ATP2A3
Thrombin Signaling	0.285	0.0667	#NUM!	1/15 (7%)	0/15 (0%)	0/15 (0%)	14/15 (93%)	MYL7
Cardiac Hypertrophy Signaling	0.285	0.0667	#NUM!	1/15 (7%)	0/15 (0%)	0/15 (0%)	14/15 (93%)	MYL7
Opioid Signaling Pathway	0.285	0.0667	#NUM!	1/15 (7%)	0/15 (0%)	0/15 (0%)	14/15 (93%)	KCNJ3
Adrenomedullin signaling pathway	0.285	0.0667	#NUM!	1/15 (7%)	0/15 (0%)	0/15 (0%)	14/15 (93%)	TTN
Protein Kinase A Signaling	0.262	0.0526	#NUM!	2/38 (5%)	0/38 (0%)	0/38 (0%)	36/38 (95%)	MYL7,TTN
Cardiac β-adrenergic Signaling	0.232	0.0556	#NUM!	1/18 (6%)	0/18 (0%)	0/18 (0%)	17/18 (94%)	ATP2A3
Axonal Guidance Signaling	0.204	0.05	#NUM!	1/20 (5%)	0/20 (0%)	0/20 (0%)	19/20 (95%)	MYL7
Cellular Effects of Sildenafil (Viagra)	0.204	0.05	#NUM!	1/20 (5%)	0/20 (0%)	0/20 (0%)	19/20 (95%)	MYL7
ILK Signaling	0.192	0.0476	#NUM!	1/21 (5%)	0/21 (0%)	0/21 (0%)	20/21 (95%)	MYL7
Tight Junction Signaling	0	0.0435	#NUM!	1/23 (4%)	0/23 (0%)	0/23 (0%)	22/23 (96%)	MYL7
Estrogen Receptor Signaling	0	0.0417	#NUM!	1/24 (4%)	0/24 (0%)	0/24 (0%)	23/24 (96%)	MYL7
Cardiac Hypertrophy Signaling (Enhanced)	0	0.0385	#NUM!	1/26 (4%)	0/26 (0%)	0/26 (0%)	25/26 (96%)	ATP2A3

## Sheet: Cellular Functions
© 2000-2021 QIAGEN. All rights reserved.
Categories	Functions	Diseases or Functions Annotation	p-value	B-H p-value	Predicted Activation State	Activation z-score	Molecules	# Molecules
Cardiovascular System Development and Function,Cellular Assembly and Organization,Cellular Development,Cellular Function and Maintenance,Cellular Growth and Proliferation,Embryonic Development,Organ Development,Organismal Development,Skeletal and Muscular System Development and Function,Tissue Development	organization	Organization of sarcomere	0.000228	0.133			FHOD3,LDB3,MYOZ2,SYNPO2L,TTN	5
Behavior	exploratory behavior	Exploratory behavior	0.000236	0.133		-1.067	GTF2I,MAP1B,MAPT,SLC9A1	4
Cellular Compromise	disassembly	Disassembly of filaments	0.000411	0.139			ABCC1,MAP1B,MAPT,SLC9A1	4
Cellular Function and Maintenance	organization	Organization of cells	0.00108	0.139			FHOD3,LDB3,MAPT,MYOZ2,SYNPO2L,TTN	6
Cellular Assembly and Organization,Cellular Compromise,Cellular Function and Maintenance	depolymerization	Depolymerization of microtubules	0.00168	0.139			ABCC1,MAP1B,MAPT	3
Cellular Assembly and Organization	bundling	Bundling of filaments	0.00168	0.139			MAP1B,MAPT,TTN	3
Cell Morphology,Cellular Assembly and Organization,Nervous System Development and Function	elongation	Elongation of neurites	0.00168	0.139			MAP1B,MAPT,SLC9A1	3
Molecular Transport	transport	Transport of ion	0.00192	0.139			ABCC1,ATP2A3,C8orf44-SGK3/SGK3,CLNS1A,KCNJ3,SLC9A1	6
Cell Morphology,Cellular Assembly and Organization,Cellular Development,Cellular Function and Maintenance,Cellular Growth and Proliferation,Nervous System Development and Function,Organismal Development,Tissue Development	polarization	Polarization of hippocampal neurons	0.00212	0.139			MAP1B,MAPT	2
Cell Morphology,Cellular Assembly and Organization,Cellular Compromise,Cellular Function and Maintenance	loss	Loss of microtubules	0.00212	0.139			MAP1B,MAPT	2
Cellular Development,Cellular Growth and Proliferation	proliferation	Proliferation of lymphoblastoid cell lines	0.00212	0.139			MAP1B,ZBTB20	2
Cell Morphology,Cellular Assembly and Organization,Nervous System Development and Function	elongation	Elongation of axons	0.00212	0.139			MAP1B,MAPT	2
Cardiovascular System Development and Function	pressure	Pressure of heart	0.00619	0.139			SLC9A1,TTN	2
Cell Cycle,Cellular Assembly and Organization,Cellular Function and Maintenance,DNA Replication, Recombination, and Repair	organization	Organization of chromosomes	0.00619	0.139			MAPT,NUCKS1	2
Cell Death and Survival,Cell Signaling	activation	Activation of caspase	0.00619	0.139			ATP2A3,MAPT	2
Cardiovascular Disease,Cardiovascular System Development and Function,Organ Morphology,Organismal Development,Organismal Injury and Abnormalities,Skeletal and Muscular Disorders	idiopathic dilated cardiomyopathy	Idiopathic dilated cardiomyopathy	0.00619	0.139			ATP2A3,FHOD3	2
Organismal Injury and Abnormalities	dysfunction	Dysfunction of mice	0.00619	0.139			MAPT,ZBTB20	2
Molecular Transport	transmembrane transport	Transmembrane transport of ion	0.00886	0.139			ATP2A3,C8orf44-SGK3/SGK3,SLC9A1	3
Cardiovascular Disease,Cardiovascular System Development and Function,Cell Morphology,Organ Morphology,Organismal Development,Organismal Injury and Abnormalities,Skeletal and Muscular Disorders,Skeletal and Muscular System Development and Function,Tissue Morphology	hypertrophy	Hypertrophy of cardiac muscle	0.00914	0.139			FHOD3,MYOZ2,SLC9A1,TTN	4
Cellular Assembly and Organization	quantity	Quantity of filaments	0.00914	0.139			MAP1B,MAPT,SLC9A1,TTN	4
Cellular Assembly and Organization,Tissue Development	fibrogenesis	Fibrogenesis	0.00935	0.139	Decreased	-2.159	FHOD3,LDB3,MAP1B,MAPT,MYOZ2,SLC9A1,SYNPO2L,TTN	8
Molecular Transport	transport	Transport of metal	0.00967	0.139			ABCC1,ATP2A3,KCNJ3,MAPT,SLC9A1	5
Free Radical Scavenging	production	Production of superoxide	0.0118	0.139			ABCC1,MAPT,SLC9A1	3
Embryonic Development,Nervous System Development and Function,Organ Development,Organ Morphology,Organismal Development,Tissue Development,Visual System Development and Function	morphology	Morphology of eye	0.0118	0.139			LMO7,MAP1B,MAPT	3
Amino Acid Metabolism,Molecular Transport,Small Molecule Biochemistry	transport	Transport of acidic amino acid	0.012	0.139			ABCC1,SLC9A1	2
Embryonic Development,Nervous System Development and Function,Ophthalmic Disease,Organ Development,Organ Morphology,Organismal Development,Organismal Injury and Abnormalities,Tissue Development,Visual System Development and Function	abnormal morphology	Abnormal morphology of outer nuclear layer	0.012	0.139			LMO7,MAP1B	2
Behavior	grooming	Grooming	0.012	0.139			MAPT,SLC9A1	2
Nervous System Development and Function,Organ Morphology,Organismal Development	morphology	Morphology of hippocampus	0.0153	0.139			MAP1B,MAPT,ZBTB20	3
Behavior	anxiety	Anxiety	0.0153	0.139			GTF2I,KCNJ3,MAPT	3
Molecular Transport	transport	Transport of inorganic anion	0.0195	0.139			ABCC1,CLNS1A	2
Cellular Development,Cellular Growth and Proliferation,Nervous System Development and Function,Tissue Development	outgrowth	Outgrowth of axons	0.0195	0.139			MAP1B,MAPT	2
Neurological Disease,Ophthalmic Disease,Organismal Injury and Abnormalities,Skeletal and Muscular Disorders	ophthalmoplegia	Ophthalmoplegia	0.0195	0.139			MAP1B,MAPT	2
Hematological System Development and Function,Lymphoid Tissue Structure and Development,Tissue Morphology	quantity	Quantity of CD4+ T-lymphocytes	0.0195	0.139			SLC9A1,ZBTB20	2
Cellular Assembly and Organization,Cellular Function and Maintenance	bundling	Bundling of microtubules	0.0195	0.139			MAP1B,MAPT	2
Carbohydrate Metabolism	catabolism	Catabolism of carbohydrate	0.0195	0.139			PNPLA7,SLC9A1	2
Molecular Transport	transport	Transport of cation	0.0213	0.139			ABCC1,ATP2A3,KCNJ3,SLC9A1	4
Cardiovascular Disease,Cardiovascular System Development and Function,Cell Morphology,Organ Morphology,Organismal Development,Organismal Injury and Abnormalities,Skeletal and Muscular Disorders,Skeletal and Muscular System Development and Function,Tissue Morphology	hypertrophy	Hypertrophy of cardiomyocytes	0.0237	0.139			FHOD3,MYOZ2,SLC9A1	3
Organismal Injury and Abnormalities,Tissue Morphology	abnormal morphology	Abnormal morphology of epithelial tissue	0.0237	0.139			C8orf44-SGK3/SGK3,LMO7,SLC9A1	3
Nervous System Development and Function,Organ Morphology,Organismal Development	size	Size of brain	0.0237	0.139			MAP1B,MAPT,ZBTB20	3
Cellular Compromise	degeneration	Degeneration of cells	0.0281	0.139			FHOD3,LDB3,MAPT,SLC9A1	4
Cellular Assembly and Organization,Cellular Function and Maintenance,Nervous System Development and Function,Tissue Morphology	quantity	Quantity of axons	0.0283	0.139			MAP1B,MAPT	2
Neurological Disease,Organismal Injury and Abnormalities	brainstem disorder	Brainstem disorder	0.0283	0.139			MAP1B,TTN	2
Cardiovascular System Development and Function,Cellular Development,Cellular Function and Maintenance,Cellular Growth and Proliferation,Embryonic Development,Organ Development,Organismal Development,Skeletal and Muscular System Development and Function,Tissue Development	assembly	Assembly of cardiomyocytes	0.0283	0.139			FHOD3,TTN	2
Nervous System Development and Function,Organ Morphology,Organismal Development	size	Size of forebrain	0.0283	0.139			MAP1B,MAPT	2
Cellular Assembly and Organization,Cellular Function and Maintenance	quantity	Quantity of microtubules	0.0283	0.139			MAP1B,MAPT	2
Cell Death and Survival	cell death	Cell death of gonadal cell lines	0.0283	0.139			ABCC1,MAPT	2
Dermatological Diseases and Conditions,Organ Morphology,Organismal Injury and Abnormalities	abnormal morphology	Abnormal morphology of epidermis	0.0283	0.139			C8orf44-SGK3/SGK3,SLC9A1	2
Cancer,Gastrointestinal Disease,Organismal Injury and Abnormalities	metastatic colorectal cancer	Metastatic colorectal cancer	0.0283	0.139			MYOZ2,SYNPO2L	2
Cellular Assembly and Organization	transport	Transport of mitochondria	0.0283	0.139			MAP1B,MAPT	2
Hereditary Disorder,Organismal Injury and Abnormalities,Skeletal and Muscular Disorders	autosomal dominant myofibrillar myopathy	Autosomal dominant myofibrillar myopathy	0.0283	0.139			LDB3,TTN	2
Cellular Compromise,Organismal Injury and Abnormalities	atrophy	Atrophy of cells	0.0283	0.139			MAPT,TTN	2
Behavior	anxiety-like behavior	Anxiety-like behavior	0.0283	0.139			KCNJ3,MAPT	2
Molecular Transport	transmembrane transport	Transmembrane transport of cation	0.0283	0.139			ATP2A3,SLC9A1	2
Behavior,Digestive System Development and Function	feeding	Feeding	0.0343	0.139			C8orf44-SGK3/SGK3,MAPT,NUCKS1	3
Carbohydrate Metabolism,Molecular Transport,Small Molecule Biochemistry	concentration	Concentration of D-glucose	0.0343	0.139			C8orf44-SGK3/SGK3,NUCKS1,ZBTB20	3
Cellular Assembly and Organization,Tissue Development	polymerization	Polymerization of filaments	0.0343	0.139			FHOD3,MAP1B,MAPT	3
Cellular Assembly and Organization,Tissue Development	formation	Formation of filaments	0.0347	0.139	Decreased	-2.159	FHOD3,MAP1B,MAPT,SLC9A1,SYNPO2L,TTN	6
Cardiovascular Disease,Organismal Injury and Abnormalities,Skeletal and Muscular Disorders	primary cardiomyopathy	Primary cardiomyopathy	0.0355	0.139			ATP2A3,FHOD3,LDB3,MYOZ2,TTN	5
Cell Morphology	elongation	Elongation of cells	0.0385	0.139			MAPT,SLC9A1	2
Digestive System Development and Function	ingestion	Ingestion by mice	0.0385	0.139			C8orf44-SGK3/SGK3,NUCKS1	2
Cellular Movement,Hematological System Development and Function,Immune Cell Trafficking	migration	Migration of antigen presenting cells	0.0385	0.139			ABCC1,MAPT	2
Cellular Assembly and Organization,Cellular Function and Maintenance	depolarization	Depolarization of cellular membrane	0.0385	0.139			ABCC1,KCNJ3	2
Organismal Development,Skeletal and Muscular System Development and Function	morphology	Morphology of hindlimb	0.0385	0.139			MAP1B,TTN	2
Cell Death and Survival,Cellular Compromise,Neurological Disease,Tissue Morphology	neurodegeneration	Neurodegeneration of axons	0.0385	0.139			MAPT,SLC9A1	2
Cell Death and Survival	cell death	Cell death of fibroblast cell lines	0.0405	0.139		1.067	ABCC1,BCL2L13,MAPT,SLC9A1	4
Gene Expression	transcription	Transcription	0.0406	0.139		-0.419	C8orf44-SGK3/SGK3,CAVIN2,GTF2I,LMO7,MAPT,MYOZ2,NUCKS1,SLC9A1,TTN,ZBTB20	10
Carbohydrate Metabolism	quantity	Quantity of carbohydrate	0.0453	0.139		0.772	ABCC1,C8orf44-SGK3/SGK3,NUCKS1,ZBTB20	4
Cellular Assembly and Organization,Cellular Function and Maintenance	quantity	Quantity of cellular protrusions	0.0469	0.139			MAP1B,MAPT,SLC9A1	3
Gastrointestinal Disease,Inflammatory Response	inflammation	Inflammation of gastrointestinal tract	0.0469	0.139			ABCC1,MYL7,SLC9A1	3
Behavior	emotional behavior	Emotional behavior	0.0469	0.139			KCNJ3,MAPT,SLC9A1	3
Cell Morphology,Cellular Assembly and Organization,Cellular Function and Maintenance	extension	Extension of microtentacles	0.047	0.139			MAPT	1
Cardiovascular System Development and Function,Hematological System Development and Function	diastolic filling velocity	Diastolic filling velocity	0.047	0.139			TTN	1
Skeletal and Muscular Disorders	myofibrilliar myopathy ZASP-related	Myofibrilliar myopathy ZASP-related	0.047	0.139			LDB3	1
Cellular Assembly and Organization,Cellular Function and Maintenance,Organismal Development	secretion	Secretion of dense granule	0.047	0.139			ATP2A3	1
Cell Morphology,Cellular Function and Maintenance	pH	PH of ventricular myocytes	0.047	0.139			SLC9A1	1
Lipid Metabolism,Molecular Transport,Small Molecule Biochemistry	translocation	Translocation of phospholipid	0.047	0.139			ABCC1	1
Cell-To-Cell Signaling and Interaction,Nervous System Development and Function	long-term potentiation	Long-term potentiation of hippocampal CA3 region	0.047	0.139			MAPT	1
Inflammatory Disease,Inflammatory Response,Neurological Disease,Organismal Injury and Abnormalities	inflammation	Inflammation of hippocampus	0.047	0.139			MAPT	1
Neurological Disease,Organismal Injury and Abnormalities	gliosis	Gliosis of hippocampal CA1 region	0.047	0.139			MAPT	1
Hereditary Disorder,Neurological Disease,Organismal Injury and Abnormalities	recessive slow wave epilepsy	Recessive slow wave epilepsy	0.047	0.139			SLC9A1	1
Behavior	coping response	Coping response	0.047	0.139			MAPT	1
Cardiovascular System Development and Function,Hematological System Development and Function	coronary flow rate	Coronary flow rate of heart	0.047	0.139			SLC9A1	1
Gastrointestinal Disease,Inflammatory Disease,Inflammatory Response,Organismal Injury and Abnormalities	inflammation	Inflammation of esophagus	0.047	0.139			SLC9A1	1
Gastrointestinal Disease	composition	Abnormal composition of feces	0.047	0.139			C8orf44-SGK3/SGK3	1
Cancer,Cell-To-Cell Signaling and Interaction,Cellular Compromise,Organismal Injury and Abnormalities	oxidative stress response	Oxidative stress response of neuroblastoma cells	0.047	0.139			MAPT	1
Cellular Movement,Hematological System Development and Function,Immune Cell Trafficking,Inflammatory Response,Nervous System Development and Function	migration	Migration of microglia	0.047	0.139			MAPT	1
Behavior	cued learning	Cued learning	0.047	0.139			MAPT	1
Neurological Disease,Organismal Injury and Abnormalities,Psychological Disorders	tauopathy	Braak stage I-II tauopathy	0.047	0.139			MAPT	1
Cellular Assembly and Organization,Cellular Compromise	formation	Formation of tau aggregates	0.047	0.139			MAPT	1
Molecular Transport	export	Export of heavy metal	0.047	0.139			MAPT	1
Metabolic Disease,Organismal Injury and Abnormalities	alkalinization	Alkalinization of cytoplasm	0.047	0.139			SLC9A1	1
Cellular Development,Cellular Growth and Proliferation	proliferation	Arrest in proliferation of lymphoma cell lines	0.047	0.139			GTF2I	1
Cell-To-Cell Signaling and Interaction	acidification	Acidification of intercellular junctions	0.047	0.139			SLC9A1	1
Amino Acid Metabolism,Drug Metabolism,Molecular Transport,Small Molecule Biochemistry	accumulation	Accumulation of methotrexate	0.047	0.139			ABCC1	1
Organ Morphology,Visual System Development and Function	opening	Opening of eyelid	0.047	0.139			MAP1B	1
Cell Morphology,Digestive System Development and Function,Organ Morphology,Organismal Development	mass	Mass of pancreatic cells	0.047	0.139			C8orf44-SGK3/SGK3	1
Cellular Assembly and Organization	quantity	Quantity of amyloid-beta plaques	0.047	0.139			MAPT	1
Cell Morphology,Cellular Function and Maintenance	pH	PH of fibroblast cell lines	0.047	0.139			SLC9A1	1
Molecular Transport	co-transport	Co-transport of arsenite	0.047	0.139			ABCC1	1
Cardiovascular Disease	prehypertension	Prehypertension	0.047	0.139			SLC9A1	1
Neurological Disease,Organismal Injury and Abnormalities	neurodegeneration	Neurodegeneration of dentate gyrus	0.047	0.139			MAPT	1
Cardiovascular Disease,Neurological Disease,Organismal Injury and Abnormalities	acute stroke	Acute stroke	0.047	0.139			MAPT	1
Cardiovascular Disease,Hereditary Disorder,Organismal Injury and Abnormalities,Skeletal and Muscular Disorders	familial hypertrophic cardiomyopathy type 24	Familial hypertrophic cardiomyopathy type 24	0.047	0.139			LDB3	1
Amino Acid Metabolism,Drug Metabolism,Molecular Transport,Small Molecule Biochemistry	uptake	Uptake of methotrexate	0.047	0.139			ABCC1	1
Cell Morphology,Cellular Assembly and Organization	elongation	Elongation of mitochondria	0.047	0.139			MAPT	1
Molecular Transport	permeation	Permeation of ion	0.047	0.139			KCNJ3	1
Cell Morphology,Reproductive System Development and Function	shape	Shape of gonadal cell lines	0.047	0.139			MAPT	1
Molecular Transport	release	Release of heavy metal	0.047	0.139			ABCC1	1
Hematological Disease,Neurological Disease,Organismal Injury and Abnormalities	disrupted blood brain barrier	Mild disrupted blood brain barrier	0.047	0.139			MAPT	1
Tissue Morphology	sensitivity	Sensitivity of oropharyngeal mucosa	0.047	0.139			ABCC1	1
Hereditary Disorder,Neurological Disease,Organismal Injury and Abnormalities,Psychological Disorders	pallidopontonigral degeneration	Pallidopontonigral degeneration	0.047	0.139			MAPT	1
Amino Acid Metabolism,Post-Translational Modification,Small Molecule Biochemistry	acetylation	Acetylation of amino acids	0.047	0.139			MAPT	1
Hematological Disease,Infectious Diseases,Organismal Injury and Abnormalities	endotoxin shock response	Endotoxin shock response	0.047	0.139			ZBTB20	1
Cell Morphology,Cellular Function and Maintenance	autophagy	Autophagy of stem cells	0.047	0.139			BCL2L13	1
Carbohydrate Metabolism,Drug Metabolism,Molecular Transport,Small Molecule Biochemistry	accumulation	Accumulation of doxorubicin	0.047	0.139			ABCC1	1
Cellular Assembly and Organization,Cellular Function and Maintenance	density	Density of endoplasmic reticulum	0.047	0.139			MAPT	1
Cellular Assembly and Organization,Tissue Development	formation	Formation of tau filament	0.047	0.139			MAPT	1
Cellular Development,Nervous System Development and Function,Tissue Development	maturation	Maturation of dendritic spines	0.047	0.139			MAPT	1
Hereditary Disorder,Neurological Disease,Organismal Injury and Abnormalities,Psychological Disorders,Skeletal and Muscular Disorders	autosomal dominant late-onset Parkinson disease	Autosomal dominant late-onset Parkinson disease	0.047	0.139			MAPT	1
Cardiovascular Disease,Inflammatory Disease,Neurological Disease,Organismal Injury and Abnormalities,Psychological Disorders	subcortical arteriosclerotic encephalopathy	Subcortical arteriosclerotic encephalopathy	0.047	0.139			MAPT	1
Carbohydrate Metabolism,Drug Metabolism,Molecular Transport,Small Molecule Biochemistry	concentration	Concentration of etoposide	0.047	0.139			ABCC1	1
Cellular Response to Therapeutics,Embryonic Development	sensitivity	Sensitivity of embryonic stem cells	0.047	0.139			ABCC1	1
Neurological Disease,Ophthalmic Disease,Organismal Injury and Abnormalities,Psychological Disorders	neuroaxonal dystrophy	Neuroaxonal dystrophy of optic nerve	0.047	0.139			MAPT	1
Cell Death and Survival,Drug Metabolism,Small Molecule Biochemistry	cytotoxicity	Cytotoxicity of etoposide	0.047	0.139			ABCC1	1
Embryonic Development,Nervous System Development and Function,Organ Development,Organismal Development,Tissue Development	development	Development of pontine nucleus	0.047	0.139			MAP1B	1
Carbohydrate Metabolism,Drug Metabolism,Small Molecule Biochemistry	sequestration	Sequestration of doxorubicin	0.047	0.139			ABCC1	1
Cellular Response to Therapeutics	drug resistance	Drug resistance of leukemia cells	0.047	0.139			ABCC1	1
Molecular Transport,Small Molecule Biochemistry	export	Export of dihydrosphingosine 1-phosphate	0.047	0.139			ABCC1	1
Cellular Compromise,Neurological Disease,Organismal Injury and Abnormalities,Tissue Morphology	degeneration	Degeneration of anterior bulbar cells	0.047	0.139			MAPT	1
Carbohydrate Metabolism,Drug Metabolism,Molecular Transport,Small Molecule Biochemistry	internalization	Internalization of hyaluronic acid	0.047	0.139			SLC9A1	1
Cell Morphology,Cell-To-Cell Signaling and Interaction,Cellular Assembly and Organization,Nervous System Development and Function,Neurological Disease,Tissue Morphology	loss	Loss of synapse	0.047	0.139			MAPT	1
Cell Death and Survival	cell viability	Cell viability of macrophage cancer cell lines	0.047	0.139			ABCC1	1
Tissue Morphology	sensitivity	Sensitivity of epithelial tissue	0.047	0.139			ABCC1	1
Neurological Disease	conduction	Abnormal conduction by nerves	0.047	0.139			MAP1B	1
Cellular Assembly and Organization,Neurological Disease,Organismal Development,Tissue Development	formation	Formation of amyloid-beta plaques	0.047	0.139			MAPT	1
Hematological Disease,Organismal Injury and Abnormalities	damage	Damage of bone marrow	0.047	0.139			ABCC1	1
Metabolic Disease,Neurological Disease,Organismal Injury and Abnormalities,Psychological Disorders	Alzheimer disease	Severe Alzheimer disease	0.047	0.139			MAPT	1
Cellular Compromise	disassembly	Disassembly of actin stress fibers	0.047	0.139			SLC9A1	1
Cell Death and Survival,Cellular Compromise,Neurological Disease,Tissue Morphology	degeneration	Degeneration of perikaryon	0.047	0.139			MAPT	1
Developmental Disorder,Hereditary Disorder,Neurological Disease,Ophthalmic Disease,Organismal Injury and Abnormalities,Skeletal and Muscular Disorders	congenital fibrosis of extraocular muscles type 1	Congenital fibrosis of extraocular muscles type 1	0.047	0.139			MAP1B	1
Cellular Function and Maintenance	hyperpolarization	Hyperpolarization of membrane	0.047	0.139			MAPT	1
Embryonic Development,Nervous System Development and Function,Organ Development,Organismal Development,Tissue Development	development	Development of retrosplenial cortex	0.047	0.139			ZBTB20	1
Carbohydrate Metabolism,Lipid Metabolism,Small Molecule Biochemistry	hydrolysis	Hydrolysis of 1-oleoyl lysophosphatidylcholine	0.047	0.139			PNPLA7	1
Molecular Transport,Protein Trafficking	transport	Transport of reporter protein	0.047	0.139			MAP1B	1
Neurological Disease,Organismal Injury and Abnormalities	neurodegeneration	Neurodegeneration of hippocampal CA1 region	0.047	0.139			MAPT	1
Developmental Disorder,Organ Morphology,Organismal Development,Organismal Injury and Abnormalities,Respiratory Disease,Respiratory System Development and Function	abnormal morphology	Abnormal morphology of broad nasal bridge	0.047	0.139			GTF2I	1
Embryonic Development,Nervous System Development and Function,Organ Development,Organismal Development,Tissue Development	development	Development of subiculum	0.047	0.139			ZBTB20	1
Drug Metabolism,Molecular Transport,Small Molecule Biochemistry	export	Export of vincristine	0.047	0.139			ABCC1	1
Molecular Transport	import	Import of K+	0.047	0.139			KCNJ3	1
Cell Death and Survival,Small Molecule Biochemistry	cytotoxicity	Cytotoxicity of vincristine	0.047	0.139			ABCC1	1
Cellular Compromise,Neurological Disease,Tissue Morphology	degeneration	Degeneration of glial cell projections	0.047	0.139			MAPT	1
Cellular Assembly and Organization	translocation	Translocation of Golgi vesicles	0.047	0.139			MAPT	1
Cell Death and Survival	cell viability	Cell viability of endothelioma cell lines	0.047	0.139			ABCC1	1
Cell Morphology,Organ Morphology,Organismal Development	mass	Mass of apud cells	0.047	0.139			C8orf44-SGK3/SGK3	1
Cell Morphology,Cellular Assembly and Organization,Cellular Function and Maintenance	shortening	Shortening of microtubules	0.047	0.139			MAPT	1
Drug Metabolism,Molecular Transport	efflux	Efflux of glutathione	0.047	0.139			ABCC1	1
Metabolic Disease,Neurological Disease,Organismal Injury and Abnormalities,Psychological Disorders	Alzheimer disease	Mild Alzheimer disease	0.047	0.139			MAPT	1
Molecular Transport	quantity	Quantity of 5,6,7,8-tetrahydrobiopterin	0.047	0.139			ABCC1	1
Neurological Disease,Organismal Injury and Abnormalities,Psychological Disorders,Skeletal and Muscular Disorders	lewy body disease	Lewy body disease	0.047	0.139			MAPT	1
Neurological Disease,Organismal Injury and Abnormalities	working memory deficit	Working memory deficit	0.047	0.139			MAPT	1
Cellular Assembly and Organization	translocation	Translocation of peroxisomes	0.047	0.139			MAPT	1
Gastrointestinal Disease	gastroesophageal reflux	Gastroesophageal reflux	0.047	0.139			SLC9A1	1
Neurological Disease,Organismal Injury and Abnormalities	astrocytosis	Astrocytosis of tissue	0.047	0.139			MAPT	1
Neurological Disease,Organismal Injury and Abnormalities,Psychological Disorders	corticobasal degeneration	Corticobasal degeneration	0.047	0.139			MAPT	1
Molecular Transport,Small Molecule Biochemistry	exchange	Exchange of H+	0.047	0.139			SLC9A1	1
Cell Death and Survival,Nervous System Development and Function	recovery	Recovery of neurons	0.047	0.139			SLC9A1	1
Endocrine System Development and Function,Molecular Transport,Protein Synthesis,Small Molecule Biochemistry	quantity	Quantity of glucagon in blood	0.047	0.139			ZBTB20	1
Hereditary Disorder,Neurological Disease,Ophthalmic Disease,Organismal Functions,Organismal Injury and Abnormalities,Psychological Disorders,Skeletal and Muscular Disorders	atypical progressive supranuclear palsy type 1	Atypical progressive supranuclear palsy type 1	0.047	0.139			MAPT	1
Molecular Transport	transport	Transport of SN-38	0.047	0.139			ABCC1	1
Cellular Function and Maintenance	preservation	Preservation of smooth muscle cells	0.047	0.139			SLC9A1	1
Dermatological Diseases and Conditions,Hair and Skin Development and Function,Organ Morphology,Organismal Injury and Abnormalities	abnormal morphology	Abnormal morphology of sparse hair	0.047	0.139			C8orf44-SGK3/SGK3	1
Cellular Compromise,Organ Morphology,Organismal Injury and Abnormalities	destruction	Destruction of spermatogenic cells	0.047	0.139			ABCC1	1
Carbohydrate Metabolism,Drug Metabolism,Molecular Transport,Small Molecule Biochemistry	co-transport	Co-transport of daunorubicin	0.047	0.139			ABCC1	1
Drug Metabolism,Molecular Transport	co-transport	Co-transport of glutathione	0.047	0.139			ABCC1	1
Nervous System Development and Function,Organ Morphology,Organismal Development	size	Size of entorhinal area	0.047	0.139			MAPT	1
Dermatological Diseases and Conditions,Organ Morphology,Organismal Injury and Abnormalities	abnormal morphology	Abnormal morphology of thin skin	0.047	0.139			SLC9A1	1
Embryonic Development,Nervous System Development and Function,Ophthalmic Disease,Organ Development,Organ Morphology,Organismal Development,Organismal Injury and Abnormalities,Tissue Development,Visual System Development and Function	abnormal morphology	Abnormal morphology of photoreceptor layer	0.047	0.139			LMO7	1
Cellular Function and Maintenance,Molecular Transport	uptake	Uptake of Na+	0.047	0.139			SLC9A1	1
Metabolic Disease,Neurological Disease,Organismal Injury and Abnormalities,Psychological Disorders	Alzheimer disease	Moderate Alzheimer disease	0.047	0.139			MAPT	1
Cellular Assembly and Organization	accumulation	Accumulation of ribosome	0.047	0.139			MAPT	1
Cellular Response to Therapeutics,Connective Tissue Development and Function	sensitivity	Sensitivity of fibroblast cell lines	0.047	0.139			ABCC1	1
Neurological Disease,Organismal Injury and Abnormalities	neurological disorder	Neurological disorder of subiculum	0.047	0.139			MAPT	1
Hair and Skin Development and Function,Ophthalmic Disease,Organismal Injury and Abnormalities	pigmentation	Abnormal pigmentation of retina	0.047	0.139			LMO7	1
Cardiovascular Disease	resistant hypertension	Resistant hypertension	0.047	0.139			SLC9A1	1
Hereditary Disorder,Neurological Disease,Organismal Injury and Abnormalities,Psychological Disorders	Pick disease	Pick disease	0.047	0.139			MAPT	1
Neurological Disease,Organismal Injury and Abnormalities	granulovacuolar degeneration	Granulovacuolar degeneration of neurons	0.047	0.139			MAPT	1
Cell Death and Survival,Cell-To-Cell Signaling and Interaction,Cellular Compromise,Neurological Disease,Tissue Morphology	degeneration	Degeneration of synapse	0.047	0.139			MAPT	1
Cell Morphology,Cellular Assembly and Organization	integrity	Integrity of mitochondrial membrane	0.047	0.139			MAPT	1
Cell Death and Survival	apoptosis	Apoptosis of hair follicle	0.047	0.139			C8orf44-SGK3/SGK3	1
Cardiovascular System Development and Function,Organismal Development,Tissue Morphology	vasodilation	Vasodilation of aorta	0.047	0.139			ABCC1	1
Cellular Assembly and Organization,Neurological Disease	deposition	Deposition of amyloid-beta plaques	0.047	0.139			MAPT	1
Nervous System Development and Function,Neurological Disease,Organ Morphology,Organismal Development,Organismal Injury and Abnormalities	abnormal morphology	Abnormal morphology of cingulate gyrus	0.047	0.139			MAP1B	1
Connective Tissue Disorders,Developmental Disorder,Organismal Injury and Abnormalities,Skeletal and Muscular Disorders	cap-myopathy with arthrogryposis multiplex congenita without heart involvement	Cap-myopathy with arthrogryposis multiplex congenita without heart involvement	0.047	0.139			TTN	1
Nervous System Development and Function,Tissue Development	development	Development of fiber tract	0.047	0.139			MAP1B	1
Protein Synthesis	quantity	Quantity of aspartate transaminase in blood	0.047	0.139			ZBTB20	1
Cardiovascular System Development and Function,Cell Morphology,Cellular Development,Organismal Development,Tissue Development	tubulation	Tubulation of microvascular endothelial cells	0.047	0.139			CAVIN2	1
Endocrine System Development and Function	insulin sensitivity index	Insulin sensitivity index	0.047	0.139			ZBTB20	1
Behavior,Nervous System Development and Function	associative memory	Associative memory	0.047	0.139			MAPT	1
Cardiovascular Disease,Hereditary Disorder,Organismal Injury and Abnormalities,Skeletal and Muscular Disorders	left ventricular noncompaction type 3	Left ventricular noncompaction type 3	0.047	0.139			LDB3	1
Organ Development,Organ Morphology,Organismal Development,Skeletal and Muscular System Development and Function	mass	Mass of soleus muscle	0.047	0.139			TTN	1
Cardiovascular Disease,Hereditary Disorder,Organismal Injury and Abnormalities,Skeletal and Muscular Disorders	left ventricular noncompaction type 2	Left ventricular noncompaction type 2	0.047	0.139			TTN	1
Hereditary Disorder,Neurological Disease,Organismal Injury and Abnormalities,Psychological Disorders,Skeletal and Muscular Disorders	Parkinson-dementia syndrome	Parkinson-dementia syndrome	0.047	0.139			MAPT	1
Carbohydrate Metabolism,Drug Metabolism,Molecular Transport,Small Molecule Biochemistry	transport	Transport of doxorubicin	0.047	0.139			ABCC1	1
Hair and Skin Development and Function,Organ Development	growth	Growth of hair	0.047	0.139			C8orf44-SGK3/SGK3	1
Cellular Development,Nervous System Development and Function,Tissue Development	differentiation	Differentiation of hippocampal neurons	0.047	0.139			MAPT	1
Carbohydrate Metabolism,Small Molecule Biochemistry	binding	Binding of heparan sulfate proteoglycan	0.047	0.139			MAPT	1
Cell Morphology,Cellular Function and Maintenance,Nervous System Development and Function	pH	PH of neurons	0.047	0.139			SLC9A1	1
Cell Cycle,Gene Expression	binding	Binding of interferon-gamma activated sequence	0.047	0.139			MAPT	1
Connective Tissue Disorders,Inflammatory Disease,Inflammatory Response,Organismal Injury and Abnormalities,Skeletal and Muscular Disorders	type II collagen-induced arthritis	Type II collagen-induced arthritis	0.047	0.139			MAPT	1
Cell Cycle,Connective Tissue Development and Function	S phase	Exit from S phase of fibroblast cell lines	0.047	0.139			GTF2I	1
Cell Morphology,Embryonic Development,Nervous System Development and Function,Ophthalmic Disease,Organ Development,Organ Morphology,Organismal Development,Organismal Injury and Abnormalities,Tissue Development,Tissue Morphology,Visual System Development and Function	abnormal morphology	Abnormal morphology of photoreceptor outer segments	0.047	0.139			LMO7	1
Drug Metabolism,Molecular Transport,Small Molecule Biochemistry	accumulation	Accumulation of flutamide	0.047	0.139			ABCC1	1
Metabolic Disease,Neurological Disease,Organismal Injury and Abnormalities,Psychological Disorders	nonfamilial Alzheimer disease	Nonfamilial Alzheimer disease	0.047	0.139			MAPT	1
Developmental Disorder,Hereditary Disorder,Organismal Injury and Abnormalities	mulibrey nanism	Mulibrey nanism	0.047	0.139			PNPLA7	1
Cellular Assembly and Organization,Cellular Movement,Nervous System Development and Function	translocation	Translocation of neurofilaments	0.047	0.139			MAPT	1
Dermatological Diseases and Conditions,Hair and Skin Development and Function,Organ Morphology,Organismal Injury and Abnormalities	abnormal morphology	Abnormal morphology of hair medulla	0.047	0.139			C8orf44-SGK3/SGK3	1
Lipid Metabolism,Small Molecule Biochemistry	critical micelle concentration	Critical micelle concentration of palmitoleic acid	0.047	0.139			MAPT	1
Cellular Assembly and Organization,Cellular Compromise	formation	Formation of fibrillar inclusions	0.047	0.139			MAPT	1
Developmental Disorder,Hereditary Disorder,Metabolic Disease,Neurological Disease,Organismal Injury and Abnormalities,Psychological Disorders	Alzheimers disease type 3	Alzheimers disease type 3	0.047	0.139			MAPT	1
Hereditary Disorder,Neurological Disease,Organismal Injury and Abnormalities	autosomal recessive peripheral neuropathy with or without impaired intellectual development	Autosomal recessive peripheral neuropathy with or without impaired intellectual development	0.047	0.139			PNPLA7	1
Cellular Assembly and Organization,Nervous System Development and Function	accumulation	Accumulation of neurofilaments	0.047	0.139			MAPT	1
Lipid Metabolism,Small Molecule Biochemistry	synthesis	Synthesis of leukotriene B4	0.047	0.139			ABCC1	1
Cell-To-Cell Signaling and Interaction,Nervous System Development and Function	synaptic transmission	Synaptic transmission of mossy fibers	0.047	0.139			MAPT	1
Nervous System Development and Function,Tissue Development	formation	Formation of axon bundle	0.047	0.139			MAP1B	1
Cardiovascular Disease,Developmental Disorder,Hereditary Disorder,Organismal Injury and Abnormalities,Skeletal and Muscular Disorders	early-onset myopathy with fatal cardiomyopathy	Early-onset myopathy with fatal cardiomyopathy	0.047	0.139			TTN	1
Behavior	spontaneous alternation behavior	Spontaneous alternation behavior	0.047	0.139			MAPT	1
Cellular Assembly and Organization,Cellular Compromise,Cellular Function and Maintenance	severing	Severing of microtubules	0.047	0.139			MAPT	1
Cellular Assembly and Organization	remodeling	Remodeling of actin filaments	0.047	0.139			SLC9A1	1
Hereditary Disorder,Organismal Injury and Abnormalities,Skeletal and Muscular Disorders	Edstrom myopathy	Edstrom myopathy	0.047	0.139			TTN	1
Cell-To-Cell Signaling and Interaction,Cellular Compromise	oxidative stress response	Oxidative stress response of neuroblastoma cell lines	0.047	0.139			MAPT	1
Cardiovascular Disease,Cardiovascular System Development and Function,Hereditary Disorder,Organ Morphology,Organismal Development,Organismal Injury and Abnormalities,Skeletal and Muscular Disorders	dilated cardiomyopathy 1g	Dilated cardiomyopathy 1g	0.047	0.139			TTN	1
Cardiovascular Disease,Cardiovascular System Development and Function,Hereditary Disorder,Organ Morphology,Organismal Development,Organismal Injury and Abnormalities,Skeletal and Muscular Disorders	dilated cardiomyopathy with left ventricular noncompaction type 1c	Dilated cardiomyopathy with left ventricular noncompaction type 1c	0.047	0.139			LDB3	1
Cell Death and Survival,Cellular Compromise,Neurological Disease,Organismal Injury and Abnormalities,Tissue Morphology	neurodegeneration	Neurodegeneration of hippocampal neurons	0.047	0.139			MAPT	1
Carbohydrate Metabolism,Drug Metabolism,Molecular Transport,Small Molecule Biochemistry	quantity	Quantity of doxorubicin	0.047	0.139			ABCC1	1
Cell Signaling,Nucleic Acid Metabolism,Small Molecule Biochemistry	binding	Binding of cyclic AMP	0.047	0.139			MAP1B	1
Cellular Assembly and Organization,Neurological Disease	accumulation	Accumulation of amyloid-beta plaques	0.047	0.139			MAPT	1
Drug Metabolism,Molecular Transport,Small Molecule Biochemistry	transport	Transport of cyanocobalamin	0.047	0.139			ABCC1	1
Dermatological Diseases and Conditions,Hair and Skin Development and Function,Organ Morphology,Organismal Injury and Abnormalities	abnormal morphology	Abnormal morphology of stratum corneum	0.047	0.139			SLC9A1	1
Endocrine System Disorders,Organismal Injury and Abnormalities	insulin tolerance	Insulin tolerance	0.047	0.139			C8orf44-SGK3/SGK3	1
Cell Death and Survival,Cellular Compromise,Neurological Disease,Organismal Injury and Abnormalities,Tissue Morphology	neurodegeneration	Neurodegeneration of CA3 neurons	0.047	0.139			MAPT	1
Cardiovascular Disease,Organismal Injury and Abnormalities,Skeletal and Muscular Disorders	mixed cardiomyopathy	Mixed cardiomyopathy	0.047	0.139			ATP2A3	1
Hematological System Development and Function,Humoral Immune Response,Lymphoid Tissue Structure and Development,Tissue Morphology	quantity	Quantity of plasmablasts	0.047	0.139			MAPT	1
Cell Death and Survival	apoptosis	Apoptosis of brain cancer cell lines	0.047	0.139			MAPT	1
Molecular Transport	transmembrane transport	Transmembrane transport of H+	0.047	0.139			SLC9A1	1
Hereditary Disorder,Neurological Disease,Organismal Injury and Abnormalities,Psychological Disorders	familial corticobasal syndrome	Familial corticobasal syndrome	0.047	0.139			MAPT	1
Amino Acid Metabolism,Drug Metabolism,Molecular Transport,Small Molecule Biochemistry,Vitamin and Mineral Metabolism	quantity	Quantity of folic acid	0.047	0.139			ABCC1	1
Neurological Disease,Organismal Injury and Abnormalities,Psychological Disorders	tauopathy	Tauopathy of hippocampus	0.047	0.139			MAPT	1
Cardiovascular System Development and Function,Organ Development,Organ Morphology	contraction	Contraction of atrium	0.047	0.139			MYL7	1
Behavior,Reproductive System Development and Function	mating behavior	Mating behavior	0.047	0.139			MAPT	1
Cellular Growth and Proliferation,Organismal Development	outgrowth	Outgrowth of Streptococcus pneumoniae	0.047	0.139			ABCC1	1
Carbohydrate Metabolism,Lipid Metabolism,Small Molecule Biochemistry	catabolism	Catabolism of phosphatidylcholine	0.047	0.139			PNPLA7	1
Hereditary Disorder,Neurological Disease,Organismal Injury and Abnormalities	Lichtenstein-Knorr syndrome	Lichtenstein-Knorr syndrome	0.047	0.139			SLC9A1	1
Carbohydrate Metabolism,Drug Metabolism,Molecular Transport,Small Molecule Biochemistry	accumulation	Accumulation of etoposide	0.047	0.139			ABCC1	1
Cell Morphology,Cellular Compromise	swelling	Swelling of Golgi apparatus	0.047	0.139			MAPT	1
Cell Death and Survival	cytotoxicity	Cytotoxicity of mitoxantrone	0.047	0.139			ABCC1	1
Cardiovascular Disease,Hereditary Disorder,Organismal Injury and Abnormalities,Skeletal and Muscular Disorders	familial hypertrophic cardiomyopathy type 9	Familial hypertrophic cardiomyopathy type 9	0.047	0.139			TTN	1
Cell Death and Survival,Lipid Metabolism,Small Molecule Biochemistry	cytotoxicity	Cytotoxicity of 15-deoxy-delta-12,14 -PGJ 2	0.047	0.139			ABCC1	1
Drug Metabolism,Molecular Transport	release	Release of glutathione	0.047	0.139			ABCC1	1
Carbohydrate Metabolism	translocation	Translocation of doxorubicin	0.047	0.139			ABCC1	1
Cell Signaling,Molecular Transport,Vitamin and Mineral Metabolism	reuptake	Reuptake of Ca2+	0.047	0.139			ATP2A3	1
Hereditary Disorder,Organismal Injury and Abnormalities,Skeletal and Muscular Disorders	tardive tibial muscular dystrophy	Tardive tibial muscular dystrophy	0.047	0.139			TTN	1
Tissue Development	formation	Formation of lumen	0.047	0.139			MAPT	1
Drug Metabolism,Molecular Transport,Small Molecule Biochemistry	co-transport	Co-transport of vincristine	0.047	0.139			ABCC1	1
Amino Acid Metabolism,Drug Metabolism,Molecular Transport,Small Molecule Biochemistry	efflux	Efflux of methotrexate	0.047	0.139			ABCC1	1
Cell-To-Cell Signaling and Interaction,Nervous System Development and Function	synaptic transmission	Synaptic transmission of collateral synapses	0.047	0.139			MAPT	1
Dermatological Diseases and Conditions,Organ Morphology,Organismal Injury and Abnormalities	abnormal morphology	Abnormal morphology of dermal papilla	0.047	0.139			C8orf44-SGK3/SGK3	1
Molecular Transport	translocation	Translocation of H+	0.047	0.139			SLC9A1	1
Cellular Function and Maintenance,Small Molecule Biochemistry	homeostasis	Homeostasis of Na+	0.047	0.139			SLC9A1	1
Post-Translational Modification,Protein Trafficking	dimerization	Dimerization of protein	0.047	0.139			TTN	1
Cell Morphology,Cellular Assembly and Organization,Skeletal and Muscular System Development and Function	structural integrity	Structural integrity of myosin filaments	0.047	0.139			TTN	1
Lipid Metabolism,Molecular Transport,Small Molecule Biochemistry	accumulation	Accumulation of leukotriene C4	0.047	0.139			ABCC1	1
Cancer,Organismal Injury and Abnormalities,Reproductive System Disease	primary prostate cancer	Primary prostate cancer	0.047	0.139			ZBTB20	1
Cellular Assembly and Organization	binding	Binding of caveolae	0.047	0.139			CAVIN2	1
Cellular Compromise,Endocrine System Disorders,Organismal Injury and Abnormalities,Reproductive System Disease	injury	Injury of spermatogenic cells	0.047	0.139			ABCC1	1
Cell Morphology,Cellular Assembly and Organization,Cellular Development,Cellular Growth and Proliferation,Nervous System Development and Function,Organismal Development,Tissue Development	morphogenesis	Morphogenesis of growth cone	0.047	0.139			MAP1B	1
Cellular Growth and Proliferation	growth	Arrest in growth of stem cell lines	0.047	0.139			SLC9A1	1
Cell Cycle	aneuploidy	Aneuploidy of chromosomes	0.047	0.139			MAPT	1
Cell Morphology,Cellular Assembly and Organization,Cellular Development,Cellular Function and Maintenance,Cellular Growth and Proliferation,Embryonic Development,Nervous System Development and Function,Organismal Development,Tissue Development	sprouting	Sprouting of mossy fibers	0.047	0.139			MAPT	1
Cell Morphology,Cellular Assembly and Organization,Skeletal and Muscular System Development and Function	structural integrity	Structural integrity of m-bands	0.047	0.139			TTN	1
Cancer,Dermatological Diseases and Conditions,Organismal Injury and Abnormalities	desmoplastic melanoma cancer	Desmoplastic melanoma	0.047	0.139			TTN	1
Lipid Metabolism,Small Molecule Biochemistry	critical micelle concentration	Critical micelle concentration of stearic acid	0.047	0.139			MAPT	1
Cell Morphology,Cellular Function and Maintenance,Embryonic Development	autophagy	Autophagy of embryonic cells	0.047	0.139			BCL2L13	1
Nervous System Development and Function,Neurological Disease,Organ Morphology,Organismal Development,Organismal Injury and Abnormalities	abnormal morphology	Abnormal morphology of inferior olivary nucleus	0.047	0.139			MAP1B	1
Cell Morphology,Tissue Development	tubulation	Tubulation of eye cell lines	0.047	0.139			CAVIN2	1
Cell-To-Cell Signaling and Interaction,Nervous System Development and Function	firing	Firing of striatal neurons	0.047	0.139			MAPT	1
Endocrine System Development and Function,Molecular Transport,Small Molecule Biochemistry	quantity	Quantity of glucagon	0.047	0.139			ZBTB20	1
Gastrointestinal Disease,Inflammatory Disease,Inflammatory Response,Organismal Injury and Abnormalities	inflammation	Inflammation of oral mucosa	0.047	0.139			ABCC1	1
Amino Acid Metabolism,Small Molecule Biochemistry	translocation	Translocation of methotrexate	0.047	0.139			ABCC1	1
Cellular Function and Maintenance,Hypersensitivity Response,Inflammatory Response	function	Function of mast cells	0.047	0.139			ABCC1	1
Lipid Metabolism,Small Molecule Biochemistry	metabolism	Metabolism of leukotriene	0.047	0.139			ABCC1	1
Drug Metabolism,Molecular Transport	accumulation	Accumulation of mitoxantrone	0.047	0.139			ABCC1	1
Behavior	reversal learning	Reversal learning	0.047	0.139			MAPT	1
Cancer,Cardiovascular Disease,Dermatological Diseases and Conditions,Developmental Disorder,Hereditary Disorder,Immunological Disease,Metabolic Disease,Neurological Disease,Organismal Injury and Abnormalities	ataxia-telangiectasia	Ataxia-telangiectasia	0.047	0.139			SLC9A1	1
Hereditary Disorder,Organismal Injury and Abnormalities,Skeletal and Muscular Disorders	X-linked myopathy with postural muscle atrophy	X-linked myopathy with postural muscle atrophy	0.047	0.139			TTN	1
Cardiovascular Disease,Hereditary Disorder,Organismal Injury and Abnormalities,Skeletal and Muscular Disorders	familial hypertrophic cardiomyopathy type 16	Familial hypertrophic cardiomyopathy type 16	0.047	0.139			MYOZ2	1
Cancer,Immunological Disease,Organismal Injury and Abnormalities	type A thymoma	Type A thymoma	0.047	0.139			GTF2I	1
Dermatological Diseases and Conditions,Hair and Skin Development and Function,Organ Morphology,Organismal Injury and Abnormalities	orientation	Abnormal orientation of hair follicle	0.047	0.139			C8orf44-SGK3/SGK3	1
Digestive System Development and Function	salivation	Salivation	0.047	0.139			SLC9A1	1
Cell Cycle	aneuploidization	Aneuploidization of breast cell lines	0.047	0.139			MAPT	1
Cell Morphology,Nervous System Development and Function,Organ Morphology,Organismal Development,Tissue Morphology	morphology	Morphology of dorsal root ganglion cells	0.047	0.139			MAPT	1
Amino Acid Metabolism,Drug Metabolism,Post-Translational Modification,Small Molecule Biochemistry	modification	Modification of methotrexate	0.047	0.139			ABCC1	1
Hematological System Development and Function,Inflammatory Response,Tissue Morphology	quantity	Quantity of inflammatory monocytes	0.047	0.139			MAPT	1
Amino Acid Metabolism,Drug Metabolism,Molecular Transport,Small Molecule Biochemistry,Vitamin and Mineral Metabolism	transport	Transport of folic acid	0.047	0.139			ABCC1	1
Cellular Response to Therapeutics	sensitivity	Sensitivity of bone marrow precursor cells	0.047	0.139			ABCC1	1
Dermatological Diseases and Conditions,Hair and Skin Development and Function,Organ Morphology,Organismal Injury and Abnormalities	abnormal morphology	Abnormal morphology of hair shaft	0.047	0.139			C8orf44-SGK3/SGK3	1
Cell Death and Survival,Cellular Compromise,Neurological Disease,Tissue Morphology	degeneration	Degeneration of dendrites	0.047	0.139			MAPT	1
Nervous System Development and Function	mechanosensory function	Mechanosensory function	0.047	0.139			MAPT	1
Drug Metabolism,Small Molecule Biochemistry	molar ratio	Molar ratio of glutathione	0.047	0.139			ABCC1	1
Cell Morphology,Cellular Assembly and Organization,Nervous System Development and Function,Tissue Morphology	diameter	Diameter of axons	0.047	0.139			MAPT	1
Metabolic Disease,Neurological Disease,Organismal Injury and Abnormalities,Psychological Disorders	Alzheimer disease	Braak stage III-IV Alzheimer disease	0.047	0.139			MAPT	1
Organismal Injury and Abnormalities	rebleeding	Rebleeding	0.047	0.139			ATP2A3	1
Cell Morphology,Embryonic Development,Nervous System Development and Function,Ophthalmic Disease,Organ Development,Organ Morphology,Organismal Development,Organismal Injury and Abnormalities,Tissue Development,Tissue Morphology,Visual System Development and Function	abnormal morphology	Abnormal morphology of photoreceptor inner segments	0.047	0.139			LMO7	1
Embryonic Development,Nervous System Development and Function,Ophthalmic Disease,Organ Development,Organ Morphology,Organismal Development,Organismal Injury and Abnormalities,Tissue Development,Visual System Development and Function	abnormal morphology	Abnormal morphology of disorganized outer nuclear layer	0.047	0.139			MAP1B	1
Drug Metabolism,Molecular Transport,Small Molecule Biochemistry	efflux	Efflux of flutamide	0.047	0.139			ABCC1	1
Carbohydrate Metabolism,Drug Metabolism,Small Molecule Biochemistry	catabolism	Catabolism of hyaluronic acid	0.047	0.139			SLC9A1	1
Embryonic Development	survival	Survival of embryo	0.047	0.139			CLNS1A	1
Lipid Metabolism,Small Molecule Biochemistry	synthesis	Synthesis of glucosylceramide	0.047	0.139			ABCC1	1
Connective Tissue Disorders,Metabolic Disease,Organismal Injury and Abnormalities	alkalinization	Alkalinization of fibroblasts	0.047	0.139			SLC9A1	1
Neurological Disease,Organismal Injury and Abnormalities,Psychological Disorders	tauopathy	Tauopathy of neurons	0.047	0.139			MAPT	1
Dermatological Diseases and Conditions,Hair and Skin Development and Function,Organ Morphology,Organismal Injury and Abnormalities	abnormal morphology	Abnormal morphology of hair cuticle	0.047	0.139			C8orf44-SGK3/SGK3	1
Cell Cycle	aneuploidization	Aneuploidization of epithelial cell lines	0.047	0.139			MAPT	1
Neurological Disease,Organismal Injury and Abnormalities,Psychological Disorders	tauopathy	Tauopathy of amygdala	0.047	0.139			MAPT	1
Cancer,Organismal Injury and Abnormalities	transformation	Transformation of microglia	0.047	0.139			MAPT	1
Nervous System Development and Function,Tissue Morphology	density	Density of axons	0.047	0.139			MAPT	1
Hematological Disease,Metabolic Disease,Organismal Injury and Abnormalities	hypokalemia	Hypokalemia	0.047	0.139			SLC9A1	1
Cell Morphology,Cellular Assembly and Organization,Cellular Function and Maintenance	length	Length of microtubules	0.047	0.139			MAPT	1
Organismal Functions	homeostasis	Homeostasis of rodents	0.047	0.139			ABCC1	1
Cellular Development,Cellular Growth and Proliferation,Embryonic Development,Organ Development,Organismal Development,Skeletal and Muscular System Development and Function,Tissue Development	myogenesis	Myogenesis of skeletal muscle cells	0.047	0.139			TTN	1
Cell Death and Survival,Cell Morphology,Nervous System Development and Function,Neurological Disease,Organ Morphology,Organismal Development,Organismal Injury and Abnormalities,Tissue Morphology	loss	Loss of granule cells	0.047	0.139			MAPT	1
Cellular Assembly and Organization,Cellular Function and Maintenance,Tissue Development	self-assembly	Self-assembly of microtubules	0.047	0.139			MAPT	1
Cancer,Neurological Disease,Organismal Injury and Abnormalities	growth	Growth of glioblastoma	0.047	0.139			BCL2L13	1
Molecular Transport	transport	Transport of irinotecan	0.047	0.139			ABCC1	1
Nervous System Development and Function,Organ Morphology,Tissue Morphology	quantity	Quantity of CA1 neuron	0.047	0.139			MAPT	1
Cell Morphology,Cellular Assembly and Organization,Nervous System Development and Function,Tissue Morphology	size	Size of postsynaptic density	0.047	0.139			MAPT	1
Behavior	disinhibited behavior	Disinhibited behavior	0.047	0.139			MAPT	1
Cellular Development,Embryonic Development,Organismal Development,Tissue Development	differentiation	Differentiation of ear mesenchymal stem cells	0.047	0.139			BCL2L13	1
Cellular Assembly and Organization	generation	Generation of tau filament	0.047	0.139			MAPT	1
Cardiovascular Disease,Cardiovascular System Development and Function,Organ Morphology,Organismal Development,Organismal Injury and Abnormalities,Skeletal and Muscular Disorders	ventricular dilated cardiomyopathy	Ventricular dilated cardiomyopathy	0.047	0.139			FHOD3	1
Embryonic Development,Nervous System Development and Function,Ophthalmic Disease,Organ Development,Organ Morphology,Organismal Development,Organismal Injury and Abnormalities,Tissue Development,Visual System Development and Function	abnormal morphology	Abnormal morphology of disorganized inner nuclear layer	0.047	0.139			MAP1B	1
Gastrointestinal Disease,Inflammatory Disease,Inflammatory Response,Organismal Injury and Abnormalities	chronic colitis	Chronic colitis	0.047	0.139			MYL7	1
Cellular Compromise,Neurological Disease,Organismal Injury and Abnormalities	atrophy	Atrophy of apical processes	0.047	0.139			MAPT	1
Cell Morphology,Dermatological Diseases and Conditions,Hair and Skin Development and Function,Organ Morphology,Organismal Injury and Abnormalities,Tissue Morphology	abnormal morphology	Abnormal morphology of disorganized outer root sheath cell	0.047	0.139			C8orf44-SGK3/SGK3	1
Cell Morphology	mitochondrial membrane permeabilization	Mitochondrial membrane permeabilization of mitochondrial outer membrane	0.047	0.139			BCL2L13	1
Hair and Skin Development and Function	appearance	Appearance of hair	0.047	0.139			MAP1B	1
Cardiovascular Disease,Hematological Disease,Organismal Injury and Abnormalities	formation	Delay in formation of thrombus	0.047	0.139			ATP2A3	1
RNA Damage and Repair	metabolism	Metabolism of rRNA	0.047	0.139			MAPT	1
Neurological Disease,Skeletal and Muscular Disorders	motor dysfunction	Mild motor dysfunction	0.047	0.139			MAPT	1
Cell Death and Survival,Drug Metabolism,Small Molecule Biochemistry	cytotoxicity	Cytotoxicity of doxorubicin	0.047	0.139			ABCC1	1
Dermatological Diseases and Conditions,Organismal Injury and Abnormalities	regression	Regression of hair follicle	0.047	0.139			C8orf44-SGK3/SGK3	1
Molecular Transport,Organismal Development	secretion	Secretion of gastric acid	0.047	0.139			C8orf44-SGK3/SGK3	1
Cellular Function and Maintenance,Molecular Transport,Small Molecule Biochemistry	exchange	Exchange of Na+	0.047	0.139			SLC9A1	1
Cell Signaling,Cellular Function and Maintenance,Small Molecule Biochemistry,Vitamin and Mineral Metabolism	calcium homeostasis	Calcium homeostasis of neurons	0.047	0.139			MAPT	1
Carbohydrate Metabolism,Drug Metabolism,Molecular Transport,Small Molecule Biochemistry	accumulation	Accumulation of daunorubicin	0.047	0.139			ABCC1	1
Neurological Disease,Organismal Injury and Abnormalities	astrocytosis	Mild astrocytosis	0.047	0.139			MAPT	1
Cellular Compromise	acidification	Acidification of islet cells	0.047	0.139			SLC9A1	1
Cellular Movement,Hair and Skin Development and Function	cell movement	Cell movement of skin cell lines	0.047	0.139			GTF2I	1
Drug Metabolism,Molecular Transport	transport	Transport of sulfinpyrazone	0.047	0.139			ABCC1	1
Lipid Metabolism,Molecular Transport,Small Molecule Biochemistry	efflux	Efflux of beta-estradiol	0.047	0.139			ABCC1	1
Drug Metabolism,Molecular Transport	depletion	Depletion of glutathione	0.047	0.139			ABCC1	1
Cellular Compromise,Organismal Injury and Abnormalities	damage	Damage of mucosa cells	0.047	0.139			ABCC1	1
Cancer,Gastrointestinal Disease,Organismal Injury and Abnormalities	Dukes stage C colorectal cancer	Dukes stage C colorectal cancer	0.047	0.139			ABCC1	1
Drug Metabolism,Molecular Transport,Vitamin and Mineral Metabolism	transport	Transport of leucovorin	0.047	0.139			ABCC1	1
Digestive System Development and Function	defecation	Defecation	0.047	0.139			C8orf44-SGK3/SGK3	1
Metabolic Disease,Neurological Disease,Organismal Injury and Abnormalities,Psychological Disorders	Alzheimer disease	Braak stage V-VI Alzheimer disease	0.047	0.139			MAPT	1
Organ Morphology	quantity	Quantity of sebaceous glands	0.047	0.139			C8orf44-SGK3/SGK3	1
Lipid Metabolism,Small Molecule Biochemistry	critical micelle concentration	Critical micelle concentration of arachidonic acid	0.047	0.139			MAPT	1
Small Molecule Biochemistry,Vitamin and Mineral Metabolism	metabolism	Metabolism of cyanocobalamin	0.047	0.139			ABCC1	1
Infectious Diseases,Neurological Disease,Organismal Injury and Abnormalities,Psychological Disorders,Skeletal and Muscular Disorders	Creutzfeldt-Jakob disease	Creutzfeldt-Jakob disease	0.047	0.139			MAPT	1
Developmental Disorder,Hereditary Disorder,Organismal Functions,Organismal Injury and Abnormalities,Skeletal and Muscular Disorders	limb-girdle muscular dystrophy type 2J	Limb-girdle muscular dystrophy type 2J	0.047	0.139			TTN	1
Cellular Assembly and Organization,DNA Replication, Recombination, and Repair	formation	Delay in initiation of formation of RAD51 nuclear focus	0.047	0.139			NUCKS1	1
Cellular Compromise,Neurological Disease,Organismal Injury and Abnormalities	lesioning	Lesioning of neurons	0.047	0.139			MAPT	1
Cellular Assembly and Organization,Cellular Function and Maintenance	aggregation	Aggregation of microtubules	0.047	0.139			MAPT	1
Drug Metabolism,Molecular Transport	transmembrane transport	Transmembrane transport of glutathione	0.047	0.139			ABCC1	1
Cell Morphology,Endocrine System Development and Function	intracellular pH	Intracellular pH of acinar gland cells	0.047	0.139			SLC9A1	1
Cellular Function and Maintenance,Molecular Transport	efflux	Efflux of organic anion	0.047	0.139			ABCC1	1
Cellular Growth and Proliferation,Connective Tissue Development and Function,Tissue Development	proliferation	Proliferation of matrix cells	0.047	0.139			C8orf44-SGK3/SGK3	1
Cellular Function and Maintenance	retention	Retention of breast cancer cell lines	0.047	0.139			MAPT	1
Lipid Metabolism,Molecular Transport,Small Molecule Biochemistry	efflux	Efflux of leukotriene C4	0.047	0.139			ABCC1	1
Drug Metabolism,Molecular Transport	transport	Transport of drug	0.047	0.139			ABCC1	1
Cellular Assembly and Organization	bundling	Bundling of actin filaments	0.047	0.139			TTN	1
Connective Tissue Disorders,Developmental Disorder,Gastrointestinal Disease,Hereditary Disorder,Neurological Disease,Organismal Development,Organismal Injury and Abnormalities,Skeletal and Muscular Disorders	Primrose syndrome	Primrose syndrome	0.047	0.139			ZBTB20	1
Organismal Survival	lifespan	Lifespan of organism	0.0499	0.146			MAPT,ZBTB20	2
Molecular Transport	release	Release of metal	0.0499	0.146			ABCC1,MAPT	2
Protein Synthesis	quantity	Quantity of leptin in blood	0.0499	0.146			NUCKS1,ZBTB20	2
Organismal Survival	viability	Viability	0.0499	0.146			MAP1B,MAPT	2
Cell Signaling,Molecular Transport,Vitamin and Mineral Metabolism	uptake	Uptake of Ca2+	0.0499	0.146			ATP2A3,TTN	2
