# Supplementary material for: Alterations in cytoskeletal and Ca2+ cycling regulators in atria lacking the obscurin Ig58/59 module
Source: Front Cardiovasc Med. 2023 Apr 13;10:1085840. doi: 10.3389/fcvm.2023.1085840 (PMC10251194; doi:10.3389/fcvm.2023.1085840)
Supplement: Supplementary file 15 [file Data_Sheet_7.xls]

## Sheet: Pathways
© 2000-2021 QIAGEN. All rights reserved.
Ingenuity Canonical Pathways	-log(p-value)	Ratio	z-score	Downregulated	No change	Upregulated	No overlap with dataset	Molecules
Communication between Innate and Adaptive Immune Cells	2.2	0.125	#NUM!	2/32 (6%)	0/32 (0%)	2/32 (6%)	28/32 (88%)	Ighv1-26,Ighv7-3,Igkv3-2,Igkv8-27
IL-15 Signaling	1.71	0.0909	#NUM!	2/44 (5%)	0/44 (0%)	2/44 (5%)	40/44 (91%)	Ighv1-26,Ighv7-3,Igkv3-2,Igkv8-27
Complement System	1.5	0.167	#NUM!	1/12 (8%)	0/12 (0%)	1/12 (8%)	10/12 (83%)	C1QBP,C4A/C4B
Systemic Lupus Erythematosus In B Cell Signaling Pathway	1.47	0.0769	#NUM!	2/52 (4%)	0/52 (0%)	2/52 (4%)	48/52 (92%)	Ighv1-26,Ighv7-3,Igkv3-2,Igkv8-27
B Cell Receptor Signaling	1.45	0.0755	#NUM!	2/53 (4%)	0/53 (0%)	2/53 (4%)	49/53 (92%)	Ighv1-26,Ighv7-3,Igkv3-2,Igkv8-27
Heme Degradation	1.33	0.5	#NUM!	0/2 (0%)	0/2 (0%)	1/2 (50%)	1/2 (50%)	HMOX2
Glucocorticoid Receptor Signaling	1.29	0.0526	#NUM!	6/114 (5%)	0/114 (0%)	0/114 (0%)	108/114 (95%)	KRT1,KRT14,KRT16,KRT17,KRT5,KRT6B
Insulin Secretion Signaling Pathway	1.04	0.0667	#NUM!	1/45 (2%)	0/45 (0%)	2/45 (4%)	42/45 (93%)	EIF2S3,EIF4G2,SLC2A4
AMPK Signaling	0.939	0.06	#NUM!	2/50 (4%)	0/50 (0%)	1/50 (2%)	47/50 (94%)	MLYCD,RAB8A,SLC2A4
Growth Hormone Signaling	0.807	0.143	#NUM!	0/7 (0%)	0/7 (0%)	1/7 (14%)	6/7 (86%)	SLC2A4
Leucine Degradation I	0.807	0.143	#NUM!	1/7 (14%)	0/7 (0%)	0/7 (0%)	6/7 (86%)	MCCC1
Vitamin-C Transport	0.754	0.125	#NUM!	0/8 (0%)	0/8 (0%)	1/8 (13%)	7/8 (88%)	SLC2A4
Adipogenesis pathway	0.754	0.125	#NUM!	0/8 (0%)	0/8 (0%)	1/8 (13%)	7/8 (88%)	SLC2A4
HIF1α Signaling	0.656	0.0541	#NUM!	1/37 (3%)	0/37 (0%)	1/37 (3%)	35/37 (95%)	ELOC,SLC2A4
FAT10 Signaling Pathway	0.656	0.0541	#NUM!	1/37 (3%)	0/37 (0%)	1/37 (3%)	35/37 (95%)	PSMB3,PSMD4
Polyamine Regulation in Colon Cancer	0.638	0.0526	#NUM!	1/38 (3%)	0/38 (0%)	1/38 (3%)	36/38 (95%)	PSMB3,PSMD4
Gustation Pathway	0.597	0.0833	#NUM!	0/12 (0%)	0/12 (0%)	1/12 (8%)	11/12 (92%)	SLC2A4
Hypoxia Signaling in the Cardiovascular System	0.567	0.0769	#NUM!	0/13 (0%)	0/13 (0%)	1/13 (8%)	12/13 (92%)	SLC2A4
Apelin Muscle Signaling Pathway	0.567	0.0769	#NUM!	0/13 (0%)	0/13 (0%)	1/13 (8%)	12/13 (92%)	SLC2A4
HOTAIR Regulatory Pathway	0.567	0.0769	#NUM!	1/13 (8%)	0/13 (0%)	0/13 (0%)	12/13 (92%)	RHOC
Protein Ubiquitination Pathway	0.564	0.0395	#NUM!	2/76 (3%)	0/76 (0%)	1/76 (1%)	73/76 (96%)	ELOC,PSMB3,PSMD4
Isoleucine Degradation I	0.541	0.0714	#NUM!	0/14 (0%)	0/14 (0%)	1/14 (7%)	13/14 (93%)	ACADSB
Acute Phase Response Signaling	0.52	0.0435	#NUM!	1/46 (2%)	0/46 (0%)	1/46 (2%)	44/46 (96%)	C4A/C4B,HMOX2
Semaphorin Signaling in Neurons	0.514	0.0667	#NUM!	1/15 (7%)	0/15 (0%)	0/15 (0%)	14/15 (93%)	RHOC
Renal Cell Carcinoma Signaling	0.514	0.0667	#NUM!	1/15 (7%)	0/15 (0%)	0/15 (0%)	14/15 (93%)	ELOC
Antioxidant Action of Vitamin C	0.514	0.0667	#NUM!	0/15 (0%)	0/15 (0%)	1/15 (7%)	14/15 (93%)	SLC2A4
Sumoylation Pathway	0.514	0.0667	#NUM!	1/15 (7%)	0/15 (0%)	0/15 (0%)	14/15 (93%)	RHOC
Phospholipase C Signaling	0.507	0.0426	#NUM!	1/47 (2%)	0/47 (0%)	1/47 (2%)	45/47 (96%)	PEBP1,RHOC
Type II Diabetes Mellitus Signaling	0.492	0.0625	#NUM!	0/16 (0%)	0/16 (0%)	1/16 (6%)	15/16 (94%)	SLC2A4
Sphingosine-1-phosphate Signaling	0.492	0.0625	#NUM!	1/16 (6%)	0/16 (0%)	0/16 (0%)	15/16 (94%)	RHOC
BAG2 Signaling Pathway	0.483	0.0408	#NUM!	1/49 (2%)	0/49 (0%)	1/49 (2%)	47/49 (96%)	PSMB3,PSMD4
Glioma Invasiveness Signaling	0.47	0.0588	#NUM!	1/17 (6%)	0/17 (0%)	0/17 (0%)	16/17 (94%)	RHOC
EIF2 Signaling	0.461	0.0345	#NUM!	2/87 (2%)	0/87 (0%)	1/87 (1%)	84/87 (97%)	EIF2S3,EIF4G2,RPLP2
Valine Degradation I	0.45	0.0556	#NUM!	0/18 (0%)	0/18 (0%)	1/18 (6%)	17/18 (94%)	ACADSB
Melatonin Signaling	0.432	0.0526	#NUM!	0/19 (0%)	0/19 (0%)	1/19 (5%)	18/19 (95%)	SLC2A4
Corticotropin Releasing Hormone Signaling	0.432	0.0526	#NUM!	1/19 (5%)	0/19 (0%)	0/19 (0%)	18/19 (95%)	KRT1
tRNA Charging	0.432	0.0526	#NUM!	0/19 (0%)	0/19 (0%)	1/19 (5%)	18/19 (95%)	TARS1
Inhibition of ARE-Mediated mRNA Degradation Pathway	0.428	0.037	#NUM!	1/54 (2%)	0/54 (0%)	1/54 (2%)	52/54 (96%)	PSMB3,PSMD4
HMGB1 Signaling	0.415	0.05	#NUM!	1/20 (5%)	0/20 (0%)	0/20 (0%)	19/20 (95%)	RHOC
Tumor Microenvironment Pathway	0.398	0.0476	#NUM!	0/21 (0%)	0/21 (0%)	1/21 (5%)	20/21 (95%)	SLC2A4
Cholecystokinin/Gastrin-mediated Signaling	0.382	0.0455	#NUM!	1/22 (5%)	0/22 (0%)	0/22 (0%)	21/22 (95%)	RHOC
Gαq Signaling	0.382	0.0455	#NUM!	1/22 (5%)	0/22 (0%)	0/22 (0%)	21/22 (95%)	RHOC
Regulation of eIF4 and p70S6K Signaling	0.381	0.0339	#NUM!	1/59 (2%)	0/59 (0%)	1/59 (2%)	57/59 (97%)	EIF2S3,EIF4G2
VEGF Signaling	0.368	0.0435	#NUM!	1/23 (4%)	0/23 (0%)	0/23 (0%)	22/23 (96%)	EIF2S3
Glioblastoma Multiforme Signaling	0.354	0.0417	#NUM!	1/24 (4%)	0/24 (0%)	0/24 (0%)	23/24 (96%)	RHOC
TEC Kinase Signaling	0.341	0.04	#NUM!	1/25 (4%)	0/25 (0%)	0/25 (0%)	24/25 (96%)	RHOC
mTOR Signaling	0.339	0.0312	#NUM!	1/64 (2%)	0/64 (0%)	1/64 (2%)	62/64 (97%)	EIF4G2,RHOC
FAK Signaling	0.329	0.0385	#NUM!	0/26 (0%)	0/26 (0%)	1/26 (4%)	25/26 (96%)	TNS1
Autophagy	0.329	0.0385	#NUM!	0/26 (0%)	0/26 (0%)	1/26 (4%)	25/26 (96%)	WIPI1
Actin Nucleation by ARP-WASP Complex	0.317	0.037	#NUM!	1/27 (4%)	0/27 (0%)	0/27 (0%)	26/27 (96%)	RHOC
FXR/RXR Activation	0.305	0.0357	#NUM!	1/28 (4%)	0/28 (0%)	0/28 (0%)	27/28 (96%)	C4A/C4B
Iron homeostasis signaling pathway	0.305	0.0357	#NUM!	0/28 (0%)	0/28 (0%)	1/28 (4%)	27/28 (96%)	HMOX2
LXR/RXR Activation	0.295	0.0345	#NUM!	1/29 (3%)	0/29 (0%)	0/29 (0%)	28/29 (97%)	C4A/C4B
Insulin Receptor Signaling	0.295	0.0345	#NUM!	0/29 (0%)	0/29 (0%)	1/29 (3%)	28/29 (97%)	SLC2A4
Ferroptosis Signaling Pathway	0.275	0.0323	#NUM!	0/31 (0%)	0/31 (0%)	1/31 (3%)	30/31 (97%)	PEBP1
IL-8 Signaling	0.266	0.0312	#NUM!	1/32 (3%)	0/32 (0%)	0/32 (0%)	31/32 (97%)	RHOC
Production of Nitric Oxide and Reactive Oxygen Species in Macrophages	0.266	0.0312	#NUM!	1/32 (3%)	0/32 (0%)	0/32 (0%)	31/32 (97%)	RHOC
Systemic Lupus Erythematosus In T Cell Signaling Pathway	0.266	0.0312	#NUM!	1/32 (3%)	0/32 (0%)	0/32 (0%)	31/32 (97%)	RHOC
Huntington's Disease Signaling	0.265	0.0267	#NUM!	1/75 (1%)	0/75 (0%)	1/75 (1%)	73/75 (97%)	PSMB3,PSMD4
Necroptosis Signaling Pathway	0.257	0.0303	#NUM!	1/33 (3%)	0/33 (0%)	0/33 (0%)	32/33 (97%)	PPID
CXCR4 Signaling	0.249	0.0294	#NUM!	1/34 (3%)	0/34 (0%)	0/34 (0%)	33/34 (97%)	RHOC
HER-2 Signaling in Breast Cancer	0.233	0.0278	#NUM!	1/36 (3%)	0/36 (0%)	0/36 (0%)	35/36 (97%)	COX5A
Colorectal Cancer Metastasis Signaling	0.225	0.027	#NUM!	1/37 (3%)	0/37 (0%)	0/37 (0%)	36/37 (97%)	RHOC
Regulation of Actin-based Motility by Rho	0.218	0.0263	#NUM!	1/38 (3%)	0/38 (0%)	0/38 (0%)	37/38 (97%)	RHOC
Mitochondrial Dysfunction	0	0.00943	#NUM!	1/106 (1%)	0/106 (0%)	0/106 (0%)	105/106 (99%)	COX5A
Thrombin Signaling	0	0.0217	#NUM!	1/46 (2%)	0/46 (0%)	0/46 (0%)	45/46 (98%)	RHOC
Cardiac Hypertrophy Signaling	0	0.0217	#NUM!	1/46 (2%)	0/46 (0%)	0/46 (0%)	45/46 (98%)	RHOC
Molecular Mechanisms of Cancer	0	0.0185	#NUM!	1/54 (2%)	0/54 (0%)	0/54 (0%)	53/54 (98%)	RHOC
Germ Cell-Sertoli Cell Junction Signaling	0	0.0204	#NUM!	1/49 (2%)	0/49 (0%)	0/49 (0%)	48/49 (98%)	RHOC
ILK Signaling	0	0.0172	#NUM!	1/58 (2%)	0/58 (0%)	0/58 (0%)	57/58 (98%)	RHOC
Signaling by Rho Family GTPases	0	0.0172	#NUM!	1/58 (2%)	0/58 (0%)	0/58 (0%)	57/58 (98%)	RHOC
RHOGDI Signaling	0	0.0164	#NUM!	1/61 (2%)	0/61 (0%)	0/61 (0%)	60/61 (98%)	RHOC
Epithelial Adherens Junction Signaling	0	0.0213	#NUM!	0/47 (0%)	0/47 (0%)	1/47 (2%)	46/47 (98%)	TNS1
Oxidative Phosphorylation	0	0.0125	#NUM!	1/80 (1%)	0/80 (0%)	0/80 (0%)	79/80 (99%)	COX5A
Integrin Signaling	0	0.0154	#NUM!	1/65 (2%)	0/65 (0%)	0/65 (0%)	64/65 (98%)	RHOC
Sirtuin Signaling Pathway	0	0.0174	#NUM!	2/115 (2%)	0/115 (0%)	0/115 (0%)	113/115 (98%)	MLYCD,PPID
Hepatic Fibrosis Signaling Pathway	0	0.0164	#NUM!	1/61 (2%)	0/61 (0%)	0/61 (0%)	60/61 (98%)	RHOC

## Sheet: Cellular Functions
© 2000-2021 QIAGEN. All rights reserved.
Categories	Functions	Diseases or Functions Annotation	p-value	B-H p-value	Predicted Activation State	Activation z-score	Molecules	# Molecules
Cell Morphology,Embryonic Development,Hair and Skin Development and Function,Organ Development,Organismal Development,Tissue Development	keratinization	Keratinization of epidermis	2.03e-06	0.00242			KRT1,KRT14,KRT16,KRT17,KRT5,KRT6B	6
Dermatological Diseases and Conditions,Developmental Disorder,Hereditary Disorder,Organismal Injury and Abnormalities,Skeletal and Muscular Disorders	pachyonychia congenita	Autosomal dominant pachyonychia congenita	1.29e-05	0.00512			KRT16,KRT17,KRT6B	3
Dermatological Diseases and Conditions,Immunological Disease,Inflammatory Disease,Inflammatory Response,Organismal Injury and Abnormalities	atopic dermatitis	Advanced stage atopic dermatitis	1.29e-05	0.00512			KRT16,KRT17,KRT5	3
Dermatological Diseases and Conditions,Hereditary Disorder,Organismal Injury and Abnormalities	hereditary palmoplantar keratoderma	Hereditary palmoplantar keratoderma	1.88e-05	0.00562			KANK2,KRT1,KRT16,KRT5	4
Developmental Disorder,Organismal Injury and Abnormalities	ectodermal dysplasia	Ectodermal dysplasia	3.33e-05	0.00683			KRT14,KRT16,KRT17,KRT6B	4
Dermatological Diseases and Conditions,Organismal Injury and Abnormalities	exanthem	Exanthem of skin	3.43e-05	0.00683			C4A/C4B,KRT1,KRT14,KRT16,KRT17,KRT6B	6
Dermatological Diseases and Conditions,Organismal Injury and Abnormalities	hyperkeratosis	Hyperkeratosis	9.66e-05	0.0135			KANK2,KRT1,KRT16,KRT5,KRT6B	5
Dermatological Diseases and Conditions,Organismal Injury and Abnormalities	plaque psoriasis	Plaque psoriasis	9.66e-05	0.0135			KRT1,KRT14,KRT16,KRT17,KRT6B	5
Neurological Disease,Organismal Injury and Abnormalities	chronic fatigue syndrome	Chronic fatigue syndrome	0.000124	0.0135			C4A/C4B,KRT14,KRT16,KRT17	4
Digestive System Development and Function,Gastrointestinal Disease,Organ Morphology,Organismal Injury and Abnormalities	abnormal morphology	Abnormal morphology of esophagus	0.000124	0.0135			KRT14,KRT5,KRT6B	3
Dermatological Diseases and Conditions,Organismal Injury and Abnormalities	ichthyosis	Ichthyosis	0.000124	0.0135			KRT1,KRT16,TARS1	3
Cell Morphology,Hair and Skin Development and Function,Organ Morphology,Tissue Morphology	morphology	Morphology of keratinocytes	0.000244	0.0225			KRT14,KRT16,KRT6B	3
Hair and Skin Development and Function	hair growth cycle	Hair growth cycle	0.000244	0.0225			KRT14,KRT16,KRT17	3
Dermatological Diseases and Conditions,Hereditary Disorder,Organismal Injury and Abnormalities	epidermolytic palmoplantar keratoderma	Epidermolytic palmoplantar keratoderma	0.000561	0.0291			KRT1,KRT16	2
Connective Tissue Disorders,Dermatological Diseases and Conditions,Developmental Disorder,Hereditary Disorder,Organismal Injury and Abnormalities	Weber-Cockayne type dominant epidermolysis bullosa simplex	Autosomal dominant Weber-Cockayne type dominant epidermolysis bullosa simplex	0.000561	0.0291			KRT14,KRT5	2
Connective Tissue Disorders,Dermatological Diseases and Conditions,Developmental Disorder,Hereditary Disorder,Organismal Injury and Abnormalities	generalized severe epidermolysis bullosa simplex	Generalized severe epidermolysis bullosa simplex	0.000561	0.0291			KRT14,KRT5	2
Small Molecule Biochemistry,Vitamin and Mineral Metabolism	binding	Binding of biotin	0.000561	0.0291			C1QBP,KRT1	2
Connective Tissue Disorders,Dermatological Diseases and Conditions,Developmental Disorder,Hereditary Disorder,Organismal Injury and Abnormalities	autosomal recessive epidermolysis bullosa simplex type 1	Autosomal recessive epidermolysis bullosa simplex type 1	0.000561	0.0291			KRT14,KRT5	2
Digestive System Development and Function,Gastrointestinal Disease,Organismal Development,Organismal Injury and Abnormalities	abnormal morphology	Abnormal morphology of palate	0.000561	0.0291			KRT5,KRT6B	2
Connective Tissue Disorders,Dermatological Diseases and Conditions,Developmental Disorder,Hereditary Disorder,Organismal Injury and Abnormalities	generalized epidermolysis bullosa simplex	Autosomal dominant generalized epidermolysis bullosa simplex	0.000561	0.0291			KRT14,KRT5	2
Dermatological Diseases and Conditions,Developmental Disorder,Hereditary Disorder,Organismal Injury and Abnormalities,Skeletal and Muscular Disorders	pachyonychia congenita 2	Pachyonychia congenita 2	0.000561	0.0291			KRT17,KRT6B	2
Organ Morphology,Organismal Development,Organismal Injury and Abnormalities,Renal and Urological Disease,Renal and Urological System Development and Function	abnormal morphology	Abnormal morphology of dilated proximal convoluted tubule	0.000561	0.0291			CD151,TNS1	2
Connective Tissue Disorders,Dermatological Diseases and Conditions,Developmental Disorder,Hereditary Disorder,Organismal Injury and Abnormalities	Dowling-Meara type epidermolysis bullosa simplex	Autosomal dominant Dowling-Meara type epidermolysis bullosa simplex	0.000561	0.0291			KRT14,KRT5	2
Connective Tissue Disorders,Dermatological Diseases and Conditions,Developmental Disorder,Hereditary Disorder,Organismal Injury and Abnormalities	inherited epidermolysis bullosa	Inherited epidermolysis bullosa	0.000662	0.0329			CD151,KRT14,KRT5	3
Dermatological Diseases and Conditions,Organ Morphology,Organismal Injury and Abnormalities	abnormal morphology	Abnormal morphology of epidermis	0.00069	0.0329			KRT1,KRT14,KRT17,KRT5	4
Dermatological Diseases and Conditions,Organismal Injury and Abnormalities	abnormality of skin morphology	Abnormality of skin morphology	0.000817	0.0375			KANK2,KRT1,KRT14,KRT16,KRT17,KRT5,KRT6B,TARS1	8
Dermatological Diseases and Conditions,Organismal Injury and Abnormalities	chronic skin disorder	Chronic skin disorder	0.00109	0.0481			C1QBP,C4A/C4B,KRT1,KRT14,KRT16,KRT17,KRT6B	7
Cell Cycle	cell cycle progression	Delay in cell cycle progression of tumor cell lines	0.00166	0.0706			KRT14,SAMHD1	2
Embryonic Development,Hair and Skin Development and Function,Organ Development,Organismal Development,Tissue Development	formation	Formation of epidermis	0.00183	0.0752			KRT14,KRT16,KRT17,KRT5	4
Organ Morphology	morphology	Morphology of skin	0.00195	0.0778			KRT1,KRT14,KRT16,KRT17,KRT5,KRT6B	6
Cell Morphology,Dermatological Diseases and Conditions,Hair and Skin Development and Function,Organ Morphology,Organismal Injury and Abnormalities,Tissue Morphology	abnormal morphology	Abnormal morphology of keratinocytes	0.00326	0.126			KRT14,KRT6B	2
Dermatological Diseases and Conditions,Organ Morphology,Organismal Injury and Abnormalities	abnormal morphology	Abnormal morphology of skin	0.00341	0.127			KRT1,KRT14,KRT17,KRT5,KRT6B	5
Cancer,Dermatological Diseases and Conditions,Organismal Injury and Abnormalities	hyperplasia	Hyperplasia of epidermis	0.00389	0.141			C1QBP,KRT16,KRT17	3
Organismal Injury and Abnormalities,Renal and Urological Disease	degeneration	Degeneration of kidney	0.00535	0.155			CD151,TNS1	2
Cellular Movement	invasion	Invasion of melanoma cell lines	0.00578	0.155			CD151,PEBP1,RHOC	3
Digestive System Development and Function	morphology	Morphology of digestive system	0.00785	0.155			C4A/C4B,HMOX2,KRT14,KRT5,KRT6B,RAB8A,SLC2A4,STARD10	8
Dermatological Diseases and Conditions,Inflammatory Disease,Inflammatory Response,Organismal Injury and Abnormalities	eczema	Eczema	0.00791	0.155			KRT14,KRT17	2
Organ Morphology,Organismal Development,Organismal Injury and Abnormalities,Renal and Urological Disease,Renal and Urological System Development and Function	formation	Formation of cast in kidney	0.00791	0.155			CD151,TNS1	2
Cancer,Organismal Injury and Abnormalities,Reproductive System Disease	breast cancer	TNM stage III breast cancer	0.00951	0.155			KRT14,KRT17,KRT5	3
Cellular Assembly and Organization,Cellular Function and Maintenance	depolarization	Depolarization of mitochondrial membrane	0.0109	0.155			HMOX2,PEBP1	2
Cellular Development,Cellular Growth and Proliferation	proliferation	Proliferation of keratinocyte cancer cell lines	0.0109	0.155			KRT14,PEBP1	2
Cardiovascular System Development and Function,Tissue Morphology	permeability	Permeability of blood vessel	0.0126	0.155			C4A/C4B,CD151,KRT1	3
Molecular Transport,Small Molecule Biochemistry	release	Release of histamine	0.0143	0.155			C4A/C4B,PEBP1	2
Cellular Assembly and Organization,Cellular Function and Maintenance	organization	Organization of intermediate filaments	0.0143	0.155			KRT17,KRT6B	2
Cellular Assembly and Organization,Cellular Function and Maintenance,Tissue Development	formation	Formation of intermediate filaments	0.0143	0.155			KRT14,KRT17	2
Dermatological Diseases and Conditions,Organismal Injury and Abnormalities	psoriasis	Psoriasis	0.0153	0.155			C1QBP,C4A/C4B,KRT1,KRT14,KRT16,KRT17,KRT5,KRT6B	8
Organismal Development,Tissue Development	morphogenesis	Morphogenesis of epithelial tissue	0.0163	0.155			KRT16,KRT17,KRT6B	3
Cell-To-Cell Signaling and Interaction,Cellular Assembly and Organization,Cellular Compromise	disruption	Disruption of anchoring junction	0.0181	0.155			OBSCN,RHOC	2
Cell Cycle	cell cycle progression	Cell cycle progression of cervical cancer cell lines	0.0181	0.155			SAMHD1,SND1	2
Inflammatory Disease,Inflammatory Response,Organismal Injury and Abnormalities,Renal and Urological Disease	interstitial nephritis	Interstitial nephritis	0.0181	0.155			CD151,TNS1	2
Behavior	exercise	Exercise	0.0181	0.155			OBSCN,SLC2A4	2
Organ Morphology,Organismal Development,Organismal Injury and Abnormalities,Renal and Urological Disease,Renal and Urological System Development and Function	abnormal morphology	Abnormal morphology of renal glomerulus	0.0204	0.155			C4A/C4B,CD151,TNS1	3
Cellular Movement	transendothelial migration	Transendothelial migration of tumor cell lines	0.0223	0.155			CD151,RHOC	2
Cell Morphology	size	Size of microvilli	0.0239	0.155			RAB8A	1
Cancer,Organismal Injury and Abnormalities,Respiratory Disease	lung metastasis	Lung metastasis of sarcoma cell lines	0.0239	0.155			SND1	1
Cellular Assembly and Organization,Cellular Compromise	disruption	Disruption of microtubule cytoskeleton	0.0239	0.155			OBSCN	1
Developmental Disorder,Hereditary Disorder,Metabolic Disease,Organismal Injury and Abnormalities,Renal and Urological Disease	malonic aciduria	Malonic aciduria	0.0239	0.155			MLYCD	1
Dermatological Diseases and Conditions,Developmental Disorder,Hereditary Disorder,Organismal Injury and Abnormalities	Dowling-Degos disease type 1	Dowling-Degos disease type 1	0.0239	0.155			KRT5	1
Energy Production,Small Molecule Biochemistry	oxidation	Oxidation of heme	0.0239	0.155			HMOX2	1
Cellular Movement,Embryonic Development	migration	Migration of cytotrophoblastic cells	0.0239	0.155			C1QBP	1
Cellular Movement	dissemination	Dissemination of Staphylococcus aureus	0.0239	0.155			C1QBP	1
Cell Morphology,Cell-To-Cell Signaling and Interaction	permeabilization	Permeabilization of tight junctions	0.0239	0.155			RHOC	1
Connective Tissue Disorders,Dermatological Diseases and Conditions,Developmental Disorder,Hereditary Disorder,Organismal Injury and Abnormalities	epidermolysis bullosa simplex with mottled pigmentation	Epidermolysis bullosa simplex with mottled pigmentation	0.0239	0.155			KRT5	1
Cardiovascular System Development and Function,Cellular Development,Cellular Function and Maintenance,Cellular Growth and Proliferation,Organismal Development,Tissue Development	angiogenesis	Angiogenesis of vascular endothelial cells	0.0239	0.155			CD151	1
Cell-To-Cell Signaling and Interaction,Cellular Assembly and Organization,Hematological System Development and Function,Immune Cell Trafficking,Inflammatory Response	cell-cell adhesion	Cell-cell adhesion of bone marrow-derived neutrophils	0.0239	0.155			FERMT3	1
Dermatological Diseases and Conditions,Organismal Injury and Abnormalities	formation	Delay in initiation of formation of basaloid follicular hamartoma	0.0239	0.155			KRT17	1
Cellular Compromise,Dermatological Diseases and Conditions,Organismal Injury and Abnormalities	rupture	Rupture of keratinocytes	0.0239	0.155			KRT6B	1
Cellular Assembly and Organization	recruitment	Recruitment of actin cytoskeleton	0.0239	0.155			TNS1	1
Dermatological Diseases and Conditions,Hereditary Disorder,Organismal Injury and Abnormalities	epidermolytic palmoplantar keratoderma	Autosomal dominant epidermolytic palmoplantar keratoderma	0.0239	0.155			KRT1	1
Cell Morphology,Hematological System Development and Function,Hematopoiesis,Tissue Morphology	shape	Shape of red blood cells	0.0239	0.155			FERMT3	1
Cardiovascular System Development and Function,Organismal Development,Tissue Morphology	vasodilation	Vasodilation of cerebellum	0.0239	0.155			HMOX2	1
Cell-To-Cell Signaling and Interaction,Embryonic Development	binding	Binding of cytotrophoblastic cells	0.0239	0.155			C1QBP	1
Lipid Metabolism,Small Molecule Biochemistry	synthesis	Synthesis of lipoxin A4	0.0239	0.155			HMOX2	1
Carbohydrate Metabolism	accumulation	Accumulation of D-glucose	0.0239	0.155			C1QBP	1
Dermatological Diseases and Conditions,Developmental Disorder,Hereditary Disorder,Organismal Injury and Abnormalities	steatocystoma multiplex	Autosomal dominant steatocystoma multiplex	0.0239	0.155			KRT17	1
Cell Morphology	size	Size of breast cancer cell lines	0.0239	0.155			KRT5	1
Cancer,Hematological Disease,Immunological Disease,Organismal Injury and Abnormalities	BCR-ABL1 T315I mutation negative BCR-ABL1 V299L mutation negative Philadelphia chromosome positive chronic myeloid leukemia	BCR-ABL1 T315I mutation negative BCR-ABL1 V299L mutation negative Philadelphia chromosome positive chronic myeloid leukemia	0.0239	0.155			STK24	1
Dermatological Diseases and Conditions,Hereditary Disorder,Organismal Injury and Abnormalities	palmoplantar keratoderma and woolly hair	Palmoplantar keratoderma and woolly hair	0.0239	0.155			KANK2	1
Hereditary Disorder,Metabolic Disease,Organismal Injury and Abnormalities	combined oxidative phosphorylation deficiency 33	Combined oxidative phosphorylation deficiency 33	0.0239	0.155			C1QBP	1
Lipid Metabolism,Nucleic Acid Metabolism,Small Molecule Biochemistry	regulation	Regulation of malonyl-coenzyme A	0.0239	0.155			MLYCD	1
Lipid Metabolism,Nucleic Acid Metabolism,Small Molecule Biochemistry	turnover	Turnover of malonyl-coenzyme A	0.0239	0.155			MLYCD	1
Dermatological Diseases and Conditions,Organismal Injury and Abnormalities	chronic small plaque psoriasis	Chronic small plaque psoriasis	0.0239	0.155			KRT16	1
Cancer,Hematological Disease,Immunological Disease,Organismal Injury and Abnormalities	chronic myeloid leukemia	Chronic phase refractory chronic myeloid leukemia	0.0239	0.155			STK24	1
Dermatological Diseases and Conditions,Organismal Injury and Abnormalities	cyclic ichthyosis with epidermolytic hyperkeratosis	Cyclic ichthyosis with epidermolytic hyperkeratosis	0.0239	0.155			KRT1	1
Hereditary Disorder,Immunological Disease,Organismal Injury and Abnormalities	leukocyte adhesion deficiency III	Leukocyte adhesion deficiency III	0.0239	0.155			FERMT3	1
Cardiovascular System Development and Function	blood flow	Blood flow of heart	0.0239	0.155			MLYCD	1
Nervous System Development and Function	sweet taste sensitivity	Sweet taste sensitivity	0.0239	0.155			SLC2A4	1
Cell Cycle	cell cycle progression	Delay in initiation of cell cycle progression of keratinocyte cancer cell lines	0.0239	0.155			KRT14	1
DNA Replication, Recombination, and Repair,Nucleic Acid Metabolism,Small Molecule Biochemistry	catabolism	Catabolism of dATP	0.0239	0.155			SAMHD1	1
Cell Morphology,Organ Morphology,Organismal Development,Organismal Injury and Abnormalities,Renal and Urological Disease,Renal and Urological System Development and Function	lack	Lack of pedicels	0.0239	0.155			CD151	1
Cell Cycle,Gene Expression	binding	Binding of TNF alpha responsive element	0.0239	0.155			KRT6B	1
Connective Tissue Disorders,Dermatological Diseases and Conditions,Developmental Disorder,Hereditary Disorder,Immunological Disease,Inflammatory Disease,Inflammatory Response,Organismal Injury and Abnormalities,Renal and Urological Disease	nephropathy with pretibal epidermolysis bullosa and deafness	Nephropathy with pretibal epidermolysis bullosa and deafness	0.0239	0.155			CD151	1
Dermatological Diseases and Conditions,Developmental Disorder,Hereditary Disorder,Organismal Injury and Abnormalities,Skeletal and Muscular Disorders	pachyonychia congenita 4	Pachyonychia congenita 4	0.0239	0.155			KRT6B	1
Auditory Disease,Hereditary Disorder,Neurological Disease,Organismal Injury and Abnormalities	autosomal recessive deafness type 25	Autosomal recessive deafness type 25	0.0239	0.155			GRXCR1	1
Dermatological Diseases and Conditions,Organismal Injury and Abnormalities	chronic large plaque psoriasis	Chronic large plaque psoriasis	0.0239	0.155			KRT16	1
Connective Tissue Disorders,Dermatological Diseases and Conditions,Developmental Disorder,Hereditary Disorder,Organismal Injury and Abnormalities	epidermolysis bullosa simplex with migratory circinate erythema	Epidermolysis bullosa simplex with migratory circinate erythema	0.0239	0.155			KRT5	1
Cell Morphology,Cellular Assembly and Organization	accumulation	Accumulation of F-actin coated vesicles	0.0239	0.155			RAB8A	1
Small Molecule Biochemistry	conversion	Conversion of heme	0.0239	0.155			HMOX2	1
Connective Tissue Development and Function,Tissue Development	accumulation	Accumulation of fibroblast cell lines	0.0239	0.155			SAMHD1	1
DNA Replication, Recombination, and Repair,Nucleic Acid Metabolism,Small Molecule Biochemistry	catabolism	Catabolism of dGTP	0.0239	0.155			SAMHD1	1
Connective Tissue Disorders,Dermatological Diseases and Conditions,Hereditary Disorder,Immunological Disease,Inflammatory Disease,Organismal Injury and Abnormalities,Skeletal and Muscular Disorders	chilblain lupus 2	Chilblain lupus 2	0.0239	0.155			SAMHD1	1
Cellular Assembly and Organization,Cellular Function and Maintenance	formation	Formation of hyaluronan cable-like structure	0.0239	0.155			C1QBP	1
Hereditary Disorder,Organismal Injury and Abnormalities,Renal and Urological Disease	nephrotic syndrome type 16	Nephrotic syndrome type 16	0.0239	0.155			KANK2	1
Connective Tissue Disorders,Developmental Disorder,Endocrine System Disorders,Hereditary Disorder,Neurological Disease,Nutritional Disease,Organismal Injury and Abnormalities,Reproductive System Disease,Skeletal and Muscular Disorders	MEHMO syndrome	MEHMO syndrome	0.0239	0.155			EIF2S3	1
Cancer,Hematological Disease,Immunological Disease,Organismal Injury and Abnormalities	blast crisis phase chronic myeloid leukemia	Chemoresistant blast crisis phase chronic myeloid leukemia	0.0239	0.155			STK24	1
Developmental Disorder,Hematological Disease,Hereditary Disorder,Metabolic Disease,Organismal Injury and Abnormalities	childhood-onset spasticity with hyperglycinemia	Childhood-onset spasticity with hyperglycinemia	0.0239	0.155			GLRX5	1
Cancer,Organismal Injury and Abnormalities,Respiratory Disease	lung metastasis	Lung metastasis of bone cancer cell lines	0.0239	0.155			SND1	1
Cardiovascular Disease,Cardiovascular System Development and Function,Organismal Injury and Abnormalities,Respiratory Disease,Tissue Morphology	abnormal morphology	Abnormal morphology of pulmonary vein	0.0239	0.155			HMOX2	1
Cancer,Hematological Disease,Organismal Injury and Abnormalities	myeloid neoplasm with eosinophilia	Blast phase myeloid neoplasm with eosinophilia	0.0239	0.155			STK24	1
Cancer,Organismal Injury and Abnormalities	oncogenic potential	Oncogenic potential of melanoma cell lines	0.0239	0.155			PEBP1	1
Dermatological Diseases and Conditions,Developmental Disorder,Organismal Injury and Abnormalities	Naegeli syndrome	Naegeli syndrome	0.0239	0.155			KRT14	1
Cardiovascular Disease,Cardiovascular System Development and Function,Organ Morphology,Organismal Development,Organismal Injury and Abnormalities	abnormal morphology	Abnormal morphology of valve leaflet	0.0239	0.155			TNS1	1
Cancer,Hematological Disease,Immunological Disease,Organismal Injury and Abnormalities	chronic phase chronic myeloid leukemia	Chemoresistant chronic phase chronic myeloid leukemia	0.0239	0.155			STK24	1
Cell Morphology	abnormal morphology	Abnormal morphology of microvilli	0.0239	0.155			RAB8A	1
Cardiovascular Disease,Developmental Disorder,Hematological Disease,Hereditary Disorder,Organismal Injury and Abnormalities	pyridoxine-refractory sideroblastic anemia type 3	Pyridoxine-refractory sideroblastic anemia type 3	0.0239	0.155			GLRX5	1
Dermatological Diseases and Conditions,Developmental Disorder,Hereditary Disorder,Neurological Disease,Organismal Injury and Abnormalities,Reproductive System Disease	nonphotosensitive trichothiodystrophy type 7	Nonphotosensitive trichothiodystrophy type 7	0.0239	0.155			TARS1	1
Dermatological Diseases and Conditions,Developmental Disorder,Hereditary Disorder,Organismal Injury and Abnormalities,Skeletal and Muscular Disorders	nonsyndromic congenital nail disorder type 4	Nonsyndromic congenital nail disorder type 4	0.0239	0.155			KRT17	1
Cell-To-Cell Signaling and Interaction	adhesion	Adhesion of skin cancer cell lines	0.0239	0.155			CD151	1
Carbohydrate Metabolism,Small Molecule Biochemistry	translocation	Translocation of D-glucose	0.0239	0.155			SLC2A4	1
Dermatological Diseases and Conditions,Hereditary Disorder,Organismal Injury and Abnormalities	Palmoplantar keratoderma striata form III	Palmoplantar keratoderma striata form III	0.0239	0.155			KRT1	1
Cancer,Hematological Disease,Organismal Injury and Abnormalities	lymphoid neoplasm with eosinophilia	Blast phase lymphoid neoplasm with eosinophilia	0.0239	0.155			STK24	1
Lipid Metabolism,Nucleic Acid Metabolism,Small Molecule Biochemistry	degradation	Degradation of malonyl-coenzyme A	0.0239	0.155			MLYCD	1
Cancer,Hematological Disease,Immunological Disease,Organismal Injury and Abnormalities	systemic mastocytosis associated BCR-ABL negative atypical chronic myeloid leukemia	Systemic mastocytosis associated BCR-ABL negative atypical chronic myeloid leukemia	0.0239	0.155			STK24	1
Cellular Assembly and Organization,Hair and Skin Development and Function	aggregation	Aggregation of keratin intermediate filaments	0.0239	0.155			KRT16	1
Developmental Disorder,Hereditary Disorder,Metabolic Disease,Organismal Injury and Abnormalities,Renal and Urological Disease	3-methylcrotonyl-CoA carboxylase 1 deficiency	3-methylcrotonyl-CoA carboxylase 1 deficiency	0.0239	0.155			MCCC1	1
Connective Tissue Disorders,Dermatological Diseases and Conditions,Developmental Disorder,Hereditary Disorder,Organismal Injury and Abnormalities	generalized epidermolysis bullosa simplex with severe palmoplantar keratosis	Generalized epidermolysis bullosa simplex with severe palmoplantar keratosis	0.0239	0.155			KRT5	1
Cancer,Hematological Disease,Immunological Disease,Organismal Injury and Abnormalities	chronic myeloid leukemia	Blast phase refractory chronic myeloid leukemia	0.0239	0.155			STK24	1
Cancer,Hematological Disease,Immunological Disease,Organismal Injury and Abnormalities	chronic phase chronic myeloid leukemia	Newly diagnosed chronic phase chronic myeloid leukemia	0.0239	0.155			STK24	1
Cancer,Organismal Injury and Abnormalities	mucoepidermoid carcinoma	Low grade mucoepidermoid carcinoma	0.0239	0.155			KRT14	1
Cancer,Hematological Disease,Immunological Disease,Organismal Injury and Abnormalities	accelerated phase chronic myelogenous leukemia	Chemoresistant accelerated phase chronic myelogenous leukemia	0.0239	0.155			STK24	1
Cell Morphology	abnormal morphology	Abnormal morphology of melanin granules	0.0239	0.155			KRT17	1
Cardiovascular Disease,Organismal Injury and Abnormalities	experimentally-induced heart failure	Experimentally-induced heart failure	0.0239	0.155			PEBP1	1
Cancer,Hematological Disease,Immunological Disease,Organismal Injury and Abnormalities	BCR-ABL1 positive BCR-ABL1 T315I and V299L mutation negative Philadelphia chromosome negative chronic myeloid leukemia	BCR-ABL1 positive BCR-ABL1 T315I and V299L mutation negative Philadelphia chromosome negative chronic myeloid leukemia	0.0239	0.155			STK24	1
Cellular Movement	invasion	Invasion of endothelial cell lines	0.0239	0.155			RHOC	1
Cardiovascular System Development and Function,Organismal Development,Tissue Morphology	vasodilation	Vasodilation of precapillary arteriole	0.0239	0.155			HMOX2	1
Infectious Diseases	listeriosis	Listeriosis	0.0239	0.155			C1QBP	1
Cancer,Cell Death and Survival,Organismal Injury and Abnormalities,Tumor Morphology	cell death	Cell death of multiple myeloma cells	0.0239	0.155			SLC2A4	1
Hereditary Disorder,Neurological Disease,Organismal Injury and Abnormalities,Psychological Disorders	Aicardi-Goutieres syndrome 5	Aicardi-Goutieres syndrome 5	0.0239	0.155			SAMHD1	1
Cellular Growth and Proliferation,Tissue Development	proliferation	Proliferation of basal cells	0.0239	0.155			KRT16	1
Dermatological Diseases and Conditions,Hereditary Disorder,Organismal Injury and Abnormalities	nonepidermolytic palmoplantar keratoderma	Nonepidermolytic palmoplantar keratoderma	0.0239	0.155			KRT1	1
Carbohydrate Metabolism,Molecular Transport,Small Molecule Biochemistry	localization	Localization of D-glucose	0.0239	0.155			SLC2A4	1
Cell Cycle	cell cycle progression	Arrest in cell cycle progression of T lymphocytes	0.0239	0.155			C1QBP	1
Developmental Disorder,Hereditary Disorder,Neurological Disease,Ophthalmic Disease,Organismal Injury and Abnormalities	warburg micro syndrome type 3	Warburg micro syndrome type 3	0.0239	0.155			RAB18	1
Dermatological Diseases and Conditions,Organismal Injury and Abnormalities	Curth Macklin type ichthyosis hystrix	Curth Macklin type ichthyosis hystrix	0.0239	0.155			KRT1	1
Cell Signaling,Vitamin and Mineral Metabolism	retention	Retention of Ca2+	0.0239	0.155			PPID	1
Cancer,Hematological Disease,Organismal Injury and Abnormalities	myeloid/lymphoid neoplasm with eosinophilia	Chronic phase myeloid/lymphoid neoplasm with eosinophilia	0.0239	0.155			STK24	1
Cell Death and Survival	apoptosis	Apoptosis of hair follicle	0.0239	0.155			KRT17	1
Cell-To-Cell Signaling and Interaction	attachment	Attachment of lung cells	0.0239	0.155			C1QBP	1
Dermatological Diseases and Conditions,Hereditary Disorder,Organismal Injury and Abnormalities	dermatopathia pigmentosa reticularis	Dermatopathia pigmentosa reticularis	0.0239	0.155			KRT14	1
Dermatological Diseases and Conditions,Organismal Injury and Abnormalities	late-onset epidermolytic hyperkeratosis	Late-onset epidermolytic hyperkeratosis	0.0239	0.155			KRT1	1
Cancer,Hematological Disease,Immunological Disease,Organismal Injury and Abnormalities	BCR-ABL T315I mutation negative Philadelphia chromosome positive chronic myeloid leukemia	BCR-ABL T315I mutation negative Philadelphia chromosome positive chronic myeloid leukemia	0.0239	0.155			STK24	1
Dermatological Diseases and Conditions,Hereditary Disorder,Organismal Injury and Abnormalities	focal nonepidermolytic palmoplantar keratoderma type 1	Focal nonepidermolytic palmoplantar keratoderma type 1	0.0239	0.155			KRT16	1
Cancer,Organismal Injury and Abnormalities	metastasis	Metastasis of skin cancer cell lines	0.0239	0.155			CD151	1
Organ Morphology,Organismal Development,Organismal Injury and Abnormalities,Renal and Urological Disease,Renal and Urological System Development and Function	formation	Formation of synechia in renal glomerulus	0.0239	0.155			CD151	1
Cell Morphology,Organ Morphology,Organismal Development,Organismal Injury and Abnormalities,Renal and Urological Disease,Renal and Urological System Development and Function	lack	Lack of podocyte slit diaphragm	0.0239	0.155			CD151	1
Respiratory Disease	vital capacity	Abnormal vital capacity	0.0239	0.155			HMOX2	1
Cellular Development,Hair and Skin Development and Function,Tissue Development	epithelialization	Epithelialization of keratinocytes	0.0239	0.155			KRT6B	1
Small Molecule Biochemistry	cleavage	Cleavage of heme	0.0239	0.155			HMOX2	1
Molecular Transport,Protein Synthesis,Protein Trafficking	localization	Localization of reporter protein	0.0239	0.155			C1QBP	1
Cellular Movement	chemotaxis	Chemotaxis of skin cancer cell lines	0.0239	0.155			CD151	1
Hereditary Disorder,Metabolic Disease,Organismal Injury and Abnormalities	short/branched-chain acyl-CoA dehydrogenase deficiency	Short/branched-chain acyl-CoA dehydrogenase deficiency	0.0239	0.155			ACADSB	1
Dermatological Diseases and Conditions,Hair and Skin Development and Function,Organ Morphology,Organismal Injury and Abnormalities	abnormal morphology	Abnormal morphology of hair medulla	0.0239	0.155			KRT17	1
Cell-To-Cell Signaling and Interaction	duration	Duration of focal adhesions	0.0239	0.155			CD151	1
Cellular Movement	dissemination	Dissemination of melanoma cell lines	0.0239	0.155			PEBP1	1
Cell-To-Cell Signaling and Interaction	attachment	Attachment of colorectal cancer cell lines	0.0239	0.155			C1QBP	1
Digestive System Development and Function,Gastrointestinal Disease,Organismal Development,Organismal Injury and Abnormalities	abnormal morphology	Abnormal morphology of hard palate	0.0239	0.155			KRT6B	1
Cell Morphology	polarization	Polarization of fibroblast cell lines	0.0239	0.155			TNS1	1
Carbohydrate Metabolism,Small Molecule Biochemistry	binding	Binding of N-acetylglucosamine	0.0239	0.155			KRT14	1
Cardiovascular Disease,Cardiovascular System Development and Function,Organ Morphology,Organismal Development,Organismal Injury and Abnormalities	abnormal morphology	Abnormal morphology of mitral valve	0.0239	0.155			TNS1	1
DNA Replication, Recombination, and Repair	replication	Replication of genomes	0.0239	0.155			RAB18	1
Dermatological Diseases and Conditions,Organismal Injury and Abnormalities	ichthyosis with confetti	Ichthyosis with confetti	0.0239	0.155			KRT1	1
Cardiovascular Disease,Organismal Injury and Abnormalities,Skeletal and Muscular Disorders	acute myocardial infarction	Stage II acute myocardial infarction	0.0239	0.155			C4A/C4B	1
Cellular Movement	transendothelial migration	Transendothelial migration of melanoma cell lines	0.0239	0.155			CD151	1
Dermatological Diseases and Conditions,Organ Morphology,Organismal Injury and Abnormalities	degeneration	Degeneration of hair follicle	0.0239	0.155			KRT17	1
Small Molecule Biochemistry	generation	Generation of hydrogen sulfide	0.0239	0.155			HMOX2	1
Cell Morphology	morphology	Morphology of keratinocyte cancer cell lines	0.0239	0.155			PEBP1	1
Hereditary Disorder,Immunological Disease,Organismal Injury and Abnormalities	leukocyte adhesion deficiency type I	Leukocyte adhesion deficiency type I	0.0239	0.155			FERMT3	1
Dermatological Diseases and Conditions,Developmental Disorder,Hereditary Disorder,Organismal Injury and Abnormalities,Skeletal and Muscular Disorders	pachyonychia congenita 1	Pachyonychia congenita 1	0.0239	0.155			KRT16	1
Cancer,Dermatological Diseases and Conditions,Organismal Injury and Abnormalities	clear cell acanthoma	Clear cell acanthoma	0.0239	0.155			KRT1	1
Cell Cycle	cell cycle progression	Delay in cell cycle progression of cervical cancer cell lines	0.0239	0.155			SAMHD1	1
Developmental Disorder,Hereditary Disorder,Immunological Disease,Organismal Injury and Abnormalities	complement component C4A deficiency	Complement component C4A deficiency	0.0239	0.155			C4A/C4B	1
Cellular Assembly and Organization,Cellular Function and Maintenance	organization	Organization of keratin intermediate filaments	0.0239	0.155			KRT6B	1
Carbohydrate Metabolism	uptake	Uptake of dehydroascorbic acid	0.0239	0.155			SLC2A4	1
Developmental Disorder,Hereditary Disorder,Immunological Disease,Organismal Injury and Abnormalities	complement component C4B deficiency	Complement component C4B deficiency	0.0239	0.155			C4A/C4B	1
Cellular Growth and Proliferation	colonization	Colonization	0.0269	0.173			C1QBP,OBSCN	2
Embryonic Development,Hair and Skin Development and Function,Organ Development,Organismal Development,Tissue Development	formation	Formation of hair follicle	0.0269	0.173			KRT16,KRT17	2
Cellular Movement	invasion	Invasion of cells	0.028	0.179		-0.421	C1QBP,CD151,FERMT3,HDLBP,KRT14,KRT17,OBSCN,PEBP1,RHOC,STK24,TNS1	11
Digestive System Development and Function,Gastrointestinal Disease	abnormal morphology	Abnormal morphology of digestive system	0.0282	0.179			C4A/C4B,HMOX2,KRT14,KRT5,KRT6B,RAB8A	6
Organismal Injury and Abnormalities	extraintestinal functional disorder	Extraintestinal functional disorder	0.0311	0.197			C4A/C4B,KRT14,KRT16,KRT17,SLC2A4	5
Cardiovascular System Development and Function,Cell-To-Cell Signaling and Interaction	binding	Binding of endothelial cells	0.0316	0.198			C1QBP,CD151,FERMT3,KRT1	4
Dermatological Diseases and Conditions,Developmental Disorder,Organismal Injury and Abnormalities	congenital anomaly of skin	Congenital anomaly of skin	0.0316	0.198			CD151,KRT14,KRT5,TARS1	4
Amino Acid Metabolism,Small Molecule Biochemistry	catabolism	Catabolism of neutral amino acid	0.0318	0.198			ACADSB,MCCC1	2
Developmental Disorder,Hereditary Disorder,Neurological Disease,Organismal Injury and Abnormalities	familial syndromic intellectual disability	Familial syndromic intellectual disability	0.0332	0.203			EIF2S3,RAB18,TARS1	3
Dermatological Diseases and Conditions,Immunological Disease,Inflammatory Disease,Organismal Injury and Abnormalities	lichen planus	Lichen planus	0.0332	0.203			KRT16,KRT17,KRT5	3
Energy Production,Lipid Metabolism,Small Molecule Biochemistry	beta-oxidation	Beta-oxidation of fatty acid	0.0332	0.203			ACADSB,MLYCD,PEBP1	3
Cell Signaling	small GTPase mediated signal transduction	Small GTPase mediated signal transduction	0.0337	0.205			KANK2,OBSCN,RHOC,TAX1BP3	4
Hematological Disease,Infectious Diseases	malaria	Malaria	0.037	0.222			C4A/C4B,GLRX5	2
Cancer,Organismal Injury and Abnormalities,Reproductive System Disease	metastasis	Metastasis of breast cancer cell lines	0.0392	0.222			CD151,KRT14,SND1	3
Post-Translational Modification,Protein Synthesis,Protein Trafficking	tetramerization	Tetramerization of protein	0.0425	0.222			KRT1,SAMHD1	2
Cell Death and Survival	apoptosis	Apoptosis of skin	0.0425	0.222			CD151,KRT17	2
Cell-To-Cell Signaling and Interaction,Cellular Assembly and Organization,Cellular Compromise	disruption	Disruption of intercellular junctions	0.0425	0.222			OBSCN,RHOC	2
Dermatological Diseases and Conditions,Immunological Disease,Inflammatory Disease,Inflammatory Response,Organismal Injury and Abnormalities	atopic dermatitis	Atopic dermatitis	0.0426	0.222			KRT1,KRT16,KRT17,KRT5	4
Inflammatory Response,Organismal Injury and Abnormalities	inflammation	Inflammation of organ	0.0435	0.222		-0.926	C4A/C4B,CD151,GLRX5,HMOX2,KRT1,KRT14,KRT16,KRT17,KRT5,PPID,SLC2A4,TNS1	12
Cancer,Endocrine System Disorders,Organismal Injury and Abnormalities,Reproductive System Disease	serous adenocarcinoma	Serous adenocarcinoma in ovary	0.0454	0.222			EIF2S3,KRT1,KRT6B,MCCC1,OBSCN	5
Cellular Movement	migration	Migration of gastric cancer cells	0.0473	0.222			RHOC	1
Cellular Movement	invasion	Invasion of skin cancer cell lines	0.0473	0.222			KRT17	1
Cancer,Hematological Disease,Immunological Disease,Organismal Injury and Abnormalities	Ph positive chronic myeloid leukemia in accelerated phase	Ph positive chronic myeloid leukemia in accelerated phase	0.0473	0.222			STK24	1
Cellular Movement,Hair and Skin Development and Function	dissemination	Dissemination of skin cell lines	0.0473	0.222			PEBP1	1
Organ Morphology,Organismal Development,Organismal Injury and Abnormalities,Renal and Urological Disease,Renal and Urological System Development and Function	abnormal morphology	Abnormal morphology of renal pelvis	0.0473	0.222			TNS1	1
Cell-To-Cell Signaling and Interaction	adhesion	Adhesion of Neisseria lactamica NL1009	0.0473	0.222			CD151	1
Hematological Disease,Immunological Disease,Infectious Diseases	infection	Infection of T lymphocytes	0.0473	0.222			SAMHD1	1
Cancer,Hematological Disease,Immunological Disease,Organismal Injury and Abnormalities	Philadelphia-positive chronic myeloid leukemia	Myeloid blast phase Philadelphia-positive chronic myeloid leukemia	0.0473	0.222			STK24	1
Cell-To-Cell Signaling and Interaction,Cellular Assembly and Organization	cell-cell adhesion	Cell-cell adhesion of hepatoma cell lines	0.0473	0.222			C1QBP	1
Hematological Disease,Immunological Disease,Infectious Diseases	infection	Infection of peritoneal macrophages	0.0473	0.222			SAMHD1	1
Cancer,Hematological Disease,Immunological Disease,Organismal Injury and Abnormalities	Philadelphia-positive chronic myeloid leukemia	Lymphoid blast phase Philadelphia-positive chronic myeloid leukemia	0.0473	0.222			STK24	1
Organismal Functions	flow	Flow of plasma	0.0473	0.222			TNS1	1
Neurological Disease	response	Abnormal response by axons	0.0473	0.222			HMOX2	1
Cell-To-Cell Signaling and Interaction	adhesion	Adhesion of Streptococcus pneumoniae D39	0.0473	0.222			CD151	1
Cell Morphology,Cellular Assembly and Organization,Dermatological Diseases and Conditions,Hair and Skin Development and Function,Organ Morphology,Organismal Injury and Abnormalities	abnormal morphology	Abnormal morphology of cornified envelope	0.0473	0.222			KRT1	1
Cancer,Organismal Injury and Abnormalities	tumorigenesis	Tumorigenesis of squamous cell carcinoma cell lines	0.0473	0.222			KRT14	1
Dermatological Diseases and Conditions,Hair and Skin Development and Function,Organ Morphology,Organismal Injury and Abnormalities	lack	Lack of vibrissae	0.0473	0.222			KRT17	1
Cellular Movement	migration	Migration of embryonic cancer cell lines	0.0473	0.222			RHOC	1
Protein Synthesis	quantity	Quantity of IL-18 in blood	0.0473	0.222			KRT1	1
Cell-To-Cell Signaling and Interaction,Cellular Assembly and Organization,Cellular Function and Maintenance	organization	Organization of stereocilia in hair cells	0.0473	0.222			GRXCR1	1
Lymphoid Tissue Structure and Development,Tissue Morphology	abnormal quantity	Abnormal quantity of bone marrow cells	0.0473	0.222			CD151	1
Cellular Movement	migration	Migration of acute lymphoblastic leukemia cells	0.0473	0.222			RHOC	1
Dermatological Diseases and Conditions,Immunological Disease,Organismal Injury and Abnormalities	bullous pemphigoid	Bullous pemphigoid	0.0473	0.222			C4A/C4B	1
Cancer,Hematological Disease,Immunological Disease,Organismal Injury and Abnormalities	Ph positive chronic myeloid leukemia in chronic phase	Ph positive chronic myeloid leukemia in chronic phase	0.0473	0.222			STK24	1
Dermatological Diseases and Conditions,Hair and Skin Development and Function,Organ Morphology,Organismal Injury and Abnormalities	abnormal morphology	Abnormal morphology of hair shaft	0.0473	0.222			KRT17	1
Cell Morphology,Digestive System Development and Function,Endocrine System Disorders,Organ Morphology,Organismal Development,Organismal Injury and Abnormalities	hypertrophy	Hypertrophy of beta islet cells	0.0473	0.222			SLC2A4	1
Lipid Metabolism,Molecular Transport,Small Molecule Biochemistry	abnormal quantity	Abnormal quantity of phospholipid	0.0473	0.222			STARD10	1
Cell-To-Cell Signaling and Interaction	adhesion	Adhesion of Neisseria meningitidis strain MC58 C13 derivative	0.0473	0.222			CD151	1
Cell-mediated Immune Response,Cell-To-Cell Signaling and Interaction,Cellular Movement,Hematological System Development and Function,Immune Cell Trafficking	adhesion	Adhesion of natural killer cells	0.0473	0.222			FERMT3	1
Cell-To-Cell Signaling and Interaction	binding	Binding of Escherichia coli 25922	0.0473	0.222			CD151	1
Cancer,Hematological Disease,Immunological Disease,Organismal Injury and Abnormalities	conventional mantle cell lymphoma	Conventional mantle cell lymphoma	0.0473	0.222			SAMHD1	1
Lipid Metabolism,Small Molecule Biochemistry,Vitamin and Mineral Metabolism	homeostasis	Homeostasis of bile salt	0.0473	0.222			STARD10	1
Amino Acid Metabolism,Molecular Transport,Small Molecule Biochemistry	uptake	Uptake of glutamine	0.0473	0.222			RHOC	1
Developmental Disorder,Hereditary Disorder,Metabolic Disease,Organismal Injury and Abnormalities	Sjögren-Larsson syndrome	Sjögren-Larsson syndrome	0.0473	0.222			KRT14	1
Cell-To-Cell Signaling and Interaction,Nervous System Development and Function	long term synaptic depression	Long term synaptic depression of Purkinje cells	0.0473	0.222			PEBP1	1
Cell Morphology,Renal and Urological System Development and Function	polarity	Polarity of kidney cell lines	0.0473	0.222			C1QBP	1
Cardiovascular System Development and Function,Cell Morphology	morphology	Morphology of endothelial cell lines	0.0473	0.222			CD151	1
Organismal Development	secretion	Secretion of bile	0.0473	0.222			STARD10	1
Cell-To-Cell Signaling and Interaction	detachment	Detachment of lymphoma cell lines	0.0473	0.222			FERMT3	1
Cancer,Connective Tissue Disorders,Organismal Injury and Abnormalities,Skeletal and Muscular Disorders	Ewing sarcoma	Ewing sarcoma in vertebrae	0.0473	0.222			EIF4G2	1
Nucleic Acid Metabolism,Small Molecule Biochemistry	binding	Binding of GDP	0.0473	0.222			EIF2S3	1
Digestive System Development and Function,Gastrointestinal Disease,Organ Morphology,Organismal Development,Organismal Injury and Abnormalities	abnormal morphology	Abnormal morphology of filiform papilla	0.0473	0.222			KRT6B	1
Lipid Metabolism,Molecular Transport,Small Molecule Biochemistry	release	Release of prostaglandin D2	0.0473	0.222			PEBP1	1
Digestive System Development and Function,Gastrointestinal Disease	intestinal transit time	Abnormal intestinal transit time	0.0473	0.222			HMOX2	1
Hair and Skin Development and Function	barrier function	Barrier function of skin	0.0473	0.222			KRT1	1
Endocrine System Disorders,Metabolic Disease,Organismal Injury and Abnormalities,Skeletal and Muscular Disorders	insulin resistance	Insulin resistance of muscle	0.0473	0.222			MLYCD	1
Dermatological Diseases and Conditions,Inflammatory Disease,Organismal Injury and Abnormalities	granulocyte colony stimulating factor-induced psoriasiform dermatitis	Granulocyte colony stimulating factor-induced psoriasiform dermatitis	0.0473	0.222			KRT16	1
Cell Morphology,Cellular Movement	cell spreading	Delay in initiation of cell spreading of breast cancer cell lines	0.0473	0.222			CD151	1
Hair and Skin Development and Function,Organ Morphology	quantity	Quantity of hair follicle	0.0473	0.222			KRT16	1
Cellular Function and Maintenance	retention	Retention of breast cancer cell lines	0.0473	0.222			CD151	1
Organ Morphology,Organismal Development,Organismal Injury and Abnormalities,Renal and Urological Disease,Renal and Urological System Development and Function	nephromegaly	Nephromegaly	0.0483	0.226			CD151,TNS1	2
Cardiovascular System Development and Function,Cell-To-Cell Signaling and Interaction	binding	Binding of vascular endothelial cells	0.0492	0.23			C1QBP,FERMT3,KRT1	3
