# Supplementary material for: Alterations in cytoskeletal and Ca2+ cycling regulators in atria lacking the obscurin Ig58/59 module
Source: Front Cardiovasc Med. 2023 Apr 13;10:1085840. doi: 10.3389/fcvm.2023.1085840 (PMC10251194; doi:10.3389/fcvm.2023.1085840)
Supplement: Supplementary file 16 [file Data_Sheet_8.xls]

## Sheet: Pathways
© 2000-2021 QIAGEN. All rights reserved.
Ingenuity Canonical Pathways	-log(p-value)	Ratio	z-score	Downregulated	No change	Upregulated	No overlap with dataset	Molecules
Dilated Cardiomyopathy Signaling Pathway	2.63	0.184	0.333	5/49 (10%)	0/49 (0%)	4/49 (8%)	40/49 (82%)	ATP2A2,CAMK2D,DMD,MAPK1,MAPK14,MYBPC3,MYL7,RYR2,TTN
B Cell Activating Factor Signaling	2.41	1	#NUM!	1/2 (50%)	0/2 (0%)	1/2 (50%)	0/2 (0%)	MAPK1,MAPK14
Type I Diabetes Mellitus Signaling	2.41	1	#NUM!	1/2 (50%)	0/2 (0%)	1/2 (50%)	0/2 (0%)	MAPK1,MAPK14
April Mediated Signaling	2.41	1	#NUM!	1/2 (50%)	0/2 (0%)	1/2 (50%)	0/2 (0%)	MAPK1,MAPK14
iNOS Signaling	2.41	1	#NUM!	1/2 (50%)	0/2 (0%)	1/2 (50%)	0/2 (0%)	MAPK1,MAPK14
IL-10 Signaling	1.95	0.667	#NUM!	1/3 (33%)	0/3 (0%)	1/3 (33%)	1/3 (33%)	MAPK1,MAPK14
IL-17A Signaling in Fibroblasts	1.95	0.667	#NUM!	1/3 (33%)	0/3 (0%)	1/3 (33%)	1/3 (33%)	MAPK1,MAPK14
IL-17A Signaling in Gastric Cells	1.95	0.667	#NUM!	1/3 (33%)	0/3 (0%)	1/3 (33%)	1/3 (33%)	MAPK1,MAPK14
Parkinson's Signaling	1.95	0.667	#NUM!	1/3 (33%)	0/3 (0%)	1/3 (33%)	1/3 (33%)	MAPK1,MAPK14
Toll-like Receptor Signaling	1.95	0.667	#NUM!	1/3 (33%)	0/3 (0%)	1/3 (33%)	1/3 (33%)	MAPK1,MAPK14
Integrin Signaling	1.86	0.182	0	3/33 (9%)	0/33 (0%)	3/33 (9%)	27/33 (82%)	CTTN,MAPK1,MYL7,MYLK3,TTN,VCL
Protein Kinase A Signaling	1.71	0.134	1.134	4/67 (6%)	0/67 (0%)	5/67 (7%)	58/67 (87%)	ADD1,CAMK2D,GYS1,MAPK1,MYL7,MYLK3,RYR2,TH,TTN
BAG2 Signaling Pathway	1.69	0.3	#NUM!	2/10 (20%)	0/10 (0%)	1/10 (10%)	7/10 (70%)	HSPA4,MAPK1,MAPK14
CD40 Signaling	1.67	0.5	#NUM!	1/4 (25%)	0/4 (0%)	1/4 (25%)	2/4 (50%)	MAPK1,MAPK14
4-1BB Signaling in T Lymphocytes	1.67	0.5	#NUM!	1/4 (25%)	0/4 (0%)	1/4 (25%)	2/4 (50%)	MAPK1,MAPK14
Role of IL-17A in Arthritis	1.67	0.5	#NUM!	1/4 (25%)	0/4 (0%)	1/4 (25%)	2/4 (50%)	MAPK1,MAPK14
Role of PKR in Interferon Induction and Antiviral Response	1.57	0.273	#NUM!	2/11 (18%)	0/11 (0%)	1/11 (9%)	8/11 (73%)	HSPA4,MAPK1,MAPK14
Apelin Cardiomyocyte Signaling Pathway	1.5	0.2	-1	3/20 (15%)	0/20 (0%)	1/20 (5%)	16/20 (80%)	ATP2A2,MAPK1,MAPK14,MYL7
IL-22 Signaling	1.47	0.4	#NUM!	1/5 (20%)	0/5 (0%)	1/5 (20%)	3/5 (60%)	MAPK1,MAPK14
Inhibition of Angiogenesis by TSP1	1.47	0.4	#NUM!	1/5 (20%)	0/5 (0%)	1/5 (20%)	3/5 (60%)	MAPK1,MAPK14
IL-17A Signaling in Airway Cells	1.47	0.4	#NUM!	1/5 (20%)	0/5 (0%)	1/5 (20%)	3/5 (60%)	MAPK1,MAPK14
Role of JAK family kinases in IL-6-type Cytokine Signaling	1.47	0.4	#NUM!	1/5 (20%)	0/5 (0%)	1/5 (20%)	3/5 (60%)	MAPK1,MAPK14
Regulation of Cellular Mechanics by Calpain Protease	1.46	0.25	#NUM!	1/12 (8%)	0/12 (0%)	2/12 (17%)	9/12 (75%)	CAST,MAPK1,VCL
Coronavirus Pathogenesis Pathway	1.46	0.25	#NUM!	2/12 (17%)	0/12 (0%)	1/12 (8%)	9/12 (75%)	HDAC2,MAPK1,MAPK14
Calcium Signaling	1.42	0.146	1	3/41 (7%)	0/41 (0%)	3/41 (7%)	35/41 (85%)	ATP2A2,CAMK2D,HDAC2,MAPK1,MYL7,RYR2
CDC42 Signaling	1.37	0.231	#NUM!	2/13 (15%)	0/13 (0%)	1/13 (8%)	10/13 (77%)	MAPK1,MAPK14,MYL7
Chemokine Signaling	1.37	0.231	#NUM!	1/13 (8%)	0/13 (0%)	2/13 (15%)	10/13 (77%)	CAMK2D,MAPK1,MAPK14
Glioma Signaling	1.21	0.2	#NUM!	1/15 (7%)	0/15 (0%)	2/15 (13%)	12/15 (80%)	CAMK2D,HDAC2,MAPK1
Hepatic Fibrosis Signaling Pathway	1.21	0.143	-0.447	3/35 (9%)	0/35 (0%)	2/35 (6%)	30/35 (86%)	MAPK1,MAPK14,MYL7,MYLK3,TTN
Cell Cycle Control of Chromosomal Replication	1.2	1	#NUM!	0/1 (0%)	0/1 (0%)	1/1 (100%)	0/1 (0%)	TOP2B
Choline Biosynthesis III	1.2	1	#NUM!	0/1 (0%)	0/1 (0%)	1/1 (100%)	0/1 (0%)	PCYT1A
Catecholamine Biosynthesis	1.2	1	#NUM!	1/1 (100%)	0/1 (0%)	0/1 (0%)	0/1 (0%)	TH
Phosphatidylcholine Biosynthesis I	1.2	1	#NUM!	0/1 (0%)	0/1 (0%)	1/1 (100%)	0/1 (0%)	PCYT1A
Glycogen Biosynthesis II (from UDP-D-Glucose)	1.2	1	#NUM!	1/1 (100%)	0/1 (0%)	0/1 (0%)	0/1 (0%)	GYS1
IL-17 Signaling	1.18	0.286	#NUM!	1/7 (14%)	0/7 (0%)	1/7 (14%)	5/7 (71%)	MAPK1,MAPK14
TGF-β Signaling	1.18	0.286	#NUM!	1/7 (14%)	0/7 (0%)	1/7 (14%)	5/7 (71%)	MAPK1,MAPK14
NER (Nucleotide Excision Repair, Enhanced Pathway)	1.18	0.286	#NUM!	0/7 (0%)	0/7 (0%)	2/7 (29%)	5/7 (71%)	HMGN1,TOP2B
Leukocyte Extravasation Signaling	1.13	0.154	#NUM!	2/26 (8%)	0/26 (0%)	2/26 (8%)	22/26 (85%)	CTTN,MAPK1,MAPK14,VCL
IL-12 Signaling and Production in Macrophages	1.07	0.25	#NUM!	1/8 (13%)	0/8 (0%)	1/8 (13%)	6/8 (75%)	MAPK1,MAPK14
Calcium-induced T Lymphocyte Apoptosis	1.07	0.25	#NUM!	2/8 (25%)	0/8 (0%)	0/8 (0%)	6/8 (75%)	ATP2A2,HDAC2
Dendritic Cell Maturation	1.07	0.25	#NUM!	1/8 (13%)	0/8 (0%)	1/8 (13%)	6/8 (75%)	MAPK1,MAPK14
PEDF Signaling	1.07	0.25	#NUM!	1/8 (13%)	0/8 (0%)	1/8 (13%)	6/8 (75%)	MAPK1,MAPK14
STAT3 Pathway	1.07	0.25	#NUM!	1/8 (13%)	0/8 (0%)	1/8 (13%)	6/8 (75%)	MAPK1,MAPK14
IL-7 Signaling Pathway	1.07	0.25	#NUM!	1/8 (13%)	0/8 (0%)	1/8 (13%)	6/8 (75%)	MAPK1,MAPK14
Role of MAPK Signaling in Inhibiting the Pathogenesis of Influenza	1.07	0.25	#NUM!	1/8 (13%)	0/8 (0%)	1/8 (13%)	6/8 (75%)	MAPK1,MAPK14
Natural Killer Cell Signaling	1.07	0.176	#NUM!	2/17 (12%)	0/17 (0%)	1/17 (6%)	14/17 (82%)	HSPA4,MAPK1,MAPK14
HIF1α Signaling	1.01	0.167	#NUM!	1/18 (6%)	0/18 (0%)	2/18 (11%)	15/18 (83%)	CAMK2D,HSPA4,MAPK1
RHOA Signaling	1.01	0.167	#NUM!	2/18 (11%)	0/18 (0%)	1/18 (6%)	15/18 (83%)	MYL7,MYLK3,TTN
Gαs Signaling	1.01	0.167	#NUM!	0/18 (0%)	0/18 (0%)	3/18 (17%)	15/18 (83%)	ADD1,MAPK1,RYR2
Germ Cell-Sertoli Cell Junction Signaling	0.991	0.138	#NUM!	1/29 (3%)	0/29 (0%)	3/29 (10%)	25/29 (86%)	MAPK1,MAPK14,SORBS1,VCL
LPS-stimulated MAPK Signaling	0.979	0.222	#NUM!	1/9 (11%)	0/9 (0%)	1/9 (11%)	7/9 (78%)	MAPK1,MAPK14
HMGB1 Signaling	0.979	0.222	#NUM!	1/9 (11%)	0/9 (0%)	1/9 (11%)	7/9 (78%)	MAPK1,MAPK14
Bladder Cancer Signaling	0.979	0.222	#NUM!	1/9 (11%)	0/9 (0%)	1/9 (11%)	7/9 (78%)	HDAC2,MAPK1
Pancreatic Adenocarcinoma Signaling	0.979	0.222	#NUM!	1/9 (11%)	0/9 (0%)	1/9 (11%)	7/9 (78%)	HDAC2,MAPK1
Mouse Embryonic Stem Cell Pluripotency	0.979	0.222	#NUM!	1/9 (11%)	0/9 (0%)	1/9 (11%)	7/9 (78%)	MAPK1,MAPK14
Antioxidant Action of Vitamin C	0.979	0.222	#NUM!	1/9 (11%)	0/9 (0%)	1/9 (11%)	7/9 (78%)	MAPK1,MAPK14
UVB-Induced MAPK Signaling	0.979	0.222	#NUM!	1/9 (11%)	0/9 (0%)	1/9 (11%)	7/9 (78%)	MAPK1,MAPK14
B Cell Receptor Signaling	0.955	0.158	#NUM!	1/19 (5%)	0/19 (0%)	2/19 (11%)	16/19 (84%)	CAMK2D,MAPK1,MAPK14
Adrenomedullin signaling pathway	0.947	0.133	#NUM!	2/30 (7%)	0/30 (0%)	2/30 (7%)	26/30 (87%)	MAPK1,MAPK14,MYLK3,TTN
Antiproliferative Role of TOB in T Cell Signaling	0.917	0.5	#NUM!	0/2 (0%)	0/2 (0%)	1/2 (50%)	1/2 (50%)	MAPK1
Thrombin Signaling	0.907	0.129	#NUM!	2/31 (6%)	0/31 (0%)	2/31 (6%)	27/31 (87%)	CAMK2D,MAPK1,MAPK14,MYL7
Huntington's Disease Signaling	0.903	0.15	#NUM!	2/20 (10%)	0/20 (0%)	1/20 (5%)	17/20 (85%)	HDAC2,HSPA4,MAPK1
Ovarian Cancer Signaling	0.903	0.15	#NUM!	1/20 (5%)	0/20 (0%)	2/20 (10%)	17/20 (85%)	GJA1,HDAC2,MAPK1
Role of Macrophages, Fibroblasts and Endothelial Cells in Rheumatoid Arthritis	0.903	0.15	#NUM!	1/20 (5%)	0/20 (0%)	2/20 (10%)	17/20 (85%)	CAMK2D,MAPK1,MAPK14
Xenobiotic Metabolism Signaling	0.903	0.15	#NUM!	1/20 (5%)	0/20 (0%)	2/20 (10%)	17/20 (85%)	CAMK2D,MAPK1,MAPK14
Actin Cytoskeleton Signaling	0.9	0.116	#NUM!	2/43 (5%)	0/43 (0%)	3/43 (7%)	38/43 (88%)	MAPK1,MYL7,MYLK3,TTN,VCL
IL-15 Signaling	0.9	0.2	#NUM!	1/10 (10%)	0/10 (0%)	1/10 (10%)	8/10 (80%)	MAPK1,MAPK14
Role of Osteoblasts, Osteoclasts and Chondrocytes in Rheumatoid Arthritis	0.9	0.2	#NUM!	1/10 (10%)	0/10 (0%)	1/10 (10%)	8/10 (80%)	MAPK1,MAPK14
IL-1 Signaling	0.9	0.2	#NUM!	1/10 (10%)	0/10 (0%)	1/10 (10%)	8/10 (80%)	MAPK1,MAPK14
RANK Signaling in Osteoclasts	0.9	0.2	#NUM!	1/10 (10%)	0/10 (0%)	1/10 (10%)	8/10 (80%)	MAPK1,MAPK14
NUR77 Signaling in T Lymphocytes	0.9	0.2	#NUM!	1/10 (10%)	0/10 (0%)	1/10 (10%)	8/10 (80%)	HDAC2,MAPK1
Role of MAPK Signaling in the Pathogenesis of Influenza	0.9	0.2	#NUM!	1/10 (10%)	0/10 (0%)	1/10 (10%)	8/10 (80%)	MAPK1,MAPK14
nNOS Signaling in Skeletal Muscle Cells	0.9	0.2	#NUM!	1/10 (10%)	0/10 (0%)	1/10 (10%)	8/10 (80%)	DMD,RYR2
EGF Signaling	0.9	0.2	#NUM!	1/10 (10%)	0/10 (0%)	1/10 (10%)	8/10 (80%)	MAPK1,MAPK14
Neuroinflammation Signaling Pathway	0.9	0.2	#NUM!	1/10 (10%)	0/10 (0%)	1/10 (10%)	8/10 (80%)	MAPK1,MAPK14
AMPK Signaling	0.87	0.125	#NUM!	3/32 (9%)	0/32 (0%)	1/32 (3%)	28/32 (88%)	GYS1,MAPK1,MAPK14,PPM1K
Paxillin Signaling	0.854	0.143	#NUM!	1/21 (5%)	0/21 (0%)	2/21 (10%)	18/21 (86%)	MAPK1,MAPK14,VCL
NAD Signaling Pathway	0.83	0.182	#NUM!	0/11 (0%)	0/11 (0%)	2/11 (18%)	9/11 (82%)	GJA1,RYR2
CCR5 Signaling in Macrophages	0.83	0.182	#NUM!	1/11 (9%)	0/11 (0%)	1/11 (9%)	9/11 (82%)	MAPK1,MAPK14
Salvage Pathways of Pyrimidine Ribonucleotides	0.83	0.182	#NUM!	0/11 (0%)	0/11 (0%)	2/11 (18%)	9/11 (82%)	APOBEC2,MAPK1
UVA-Induced MAPK Signaling	0.83	0.182	#NUM!	1/11 (9%)	0/11 (0%)	1/11 (9%)	9/11 (82%)	MAPK1,MAPK14
UVC-Induced MAPK Signaling	0.83	0.182	#NUM!	1/11 (9%)	0/11 (0%)	1/11 (9%)	9/11 (82%)	MAPK1,MAPK14
Xenobiotic Metabolism General Signaling Pathway	0.83	0.182	#NUM!	1/11 (9%)	0/11 (0%)	1/11 (9%)	9/11 (82%)	MAPK1,MAPK14
GM-CSF Signaling	0.83	0.182	#NUM!	0/11 (0%)	0/11 (0%)	2/11 (18%)	9/11 (82%)	CAMK2D,MAPK1
Cardiac Hypertrophy Signaling (Enhanced)	0.827	0.103	0.816	3/58 (5%)	0/58 (0%)	3/58 (5%)	52/58 (90%)	ATP2A2,CAMK2D,HDAC2,MAPK1,MAPK14,RYR2
FAK Signaling	0.81	0.136	#NUM!	1/22 (5%)	0/22 (0%)	2/22 (9%)	19/22 (86%)	MAPK1,TNS1,VCL
Glucocorticoid Receptor Signaling	0.799	0.118	#NUM!	2/34 (6%)	0/34 (0%)	2/34 (6%)	30/34 (88%)	GJA1,HSPA4,MAPK1,MAPK14
ATM Signaling	0.77	0.167	#NUM!	2/12 (17%)	0/12 (0%)	0/12 (0%)	10/12 (83%)	HP1BP3,MAPK14
Amyloid Processing	0.77	0.167	#NUM!	1/12 (8%)	0/12 (0%)	1/12 (8%)	10/12 (83%)	MAPK1,MAPK14
p38 MAPK Signaling	0.77	0.167	#NUM!	1/12 (8%)	0/12 (0%)	1/12 (8%)	10/12 (83%)	HMGN1,MAPK14
Role of MAPK Signaling in Promoting the Pathogenesis of Influenza	0.77	0.167	#NUM!	1/12 (8%)	0/12 (0%)	1/12 (8%)	10/12 (83%)	MAPK1,MAPK14
MIF Regulation of Innate Immunity	0.752	0.333	#NUM!	0/3 (0%)	0/3 (0%)	1/3 (33%)	2/3 (67%)	MAPK1
Calcium Transport I	0.752	0.333	#NUM!	1/3 (33%)	0/3 (0%)	0/3 (0%)	2/3 (67%)	ATP2A2
Cell Cycle: G1/S Checkpoint Regulation	0.752	0.333	#NUM!	1/3 (33%)	0/3 (0%)	0/3 (0%)	2/3 (67%)	HDAC2
MSP-RON Signaling In Macrophages Pathway	0.752	0.333	#NUM!	0/3 (0%)	0/3 (0%)	1/3 (33%)	2/3 (67%)	MAPK1
Role of NFAT in Cardiac Hypertrophy	0.735	0.111	#NUM!	2/36 (6%)	0/36 (0%)	2/36 (6%)	32/36 (89%)	CAMK2D,HDAC2,MAPK1,MAPK14
FLT3 Signaling in Hematopoietic Progenitor Cells	0.712	0.154	#NUM!	1/13 (8%)	0/13 (0%)	1/13 (8%)	11/13 (85%)	MAPK1,MAPK14
Prostate Cancer Signaling	0.712	0.154	#NUM!	1/13 (8%)	0/13 (0%)	1/13 (8%)	11/13 (85%)	HDAC2,MAPK1
Non-Small Cell Lung Cancer Signaling	0.712	0.154	#NUM!	1/13 (8%)	0/13 (0%)	1/13 (8%)	11/13 (85%)	HDAC2,MAPK1
PKCθ Signaling in T Lymphocytes	0.712	0.154	#NUM!	0/13 (0%)	0/13 (0%)	2/13 (15%)	11/13 (85%)	CAMK2D,MAPK1
FGF Signaling	0.712	0.154	#NUM!	1/13 (8%)	0/13 (0%)	1/13 (8%)	11/13 (85%)	MAPK1,MAPK14
IL-6 Signaling	0.712	0.154	#NUM!	1/13 (8%)	0/13 (0%)	1/13 (8%)	11/13 (85%)	MAPK1,MAPK14
Apelin Adipocyte Signaling Pathway	0.712	0.154	#NUM!	1/13 (8%)	0/13 (0%)	1/13 (8%)	11/13 (85%)	MAPK1,MAPK14
Nitric Oxide Signaling in the Cardiovascular System	0.693	0.12	#NUM!	1/25 (4%)	0/25 (0%)	2/25 (8%)	22/25 (88%)	ATP2A2,MAPK1,RYR2
Fc Epsilon RI Signaling	0.664	0.143	#NUM!	1/14 (7%)	0/14 (0%)	1/14 (7%)	12/14 (86%)	MAPK1,MAPK14
Agrin Interactions at Neuromuscular Junction	0.664	0.143	#NUM!	1/14 (7%)	0/14 (0%)	1/14 (7%)	12/14 (86%)	CTTN,MAPK1
Chronic Myeloid Leukemia Signaling	0.664	0.143	#NUM!	1/14 (7%)	0/14 (0%)	1/14 (7%)	12/14 (86%)	HDAC2,MAPK1
Role of Tissue Factor in Cancer	0.664	0.143	#NUM!	1/14 (7%)	0/14 (0%)	1/14 (7%)	12/14 (86%)	MAPK1,MAPK14
Telomerase Signaling	0.664	0.143	#NUM!	1/14 (7%)	0/14 (0%)	1/14 (7%)	12/14 (86%)	HDAC2,MAPK1
ERBB Signaling	0.664	0.143	#NUM!	1/14 (7%)	0/14 (0%)	1/14 (7%)	12/14 (86%)	MAPK1,MAPK14
BMP signaling pathway	0.664	0.143	#NUM!	1/14 (7%)	0/14 (0%)	1/14 (7%)	12/14 (86%)	MAPK1,MAPK14
Regulation Of The Epithelial Mesenchymal Transition By Growth Factors Pathway	0.664	0.143	#NUM!	1/14 (7%)	0/14 (0%)	1/14 (7%)	12/14 (86%)	MAPK1,MAPK14
Sertoli Cell-Sertoli Cell Junction Signaling	0.65	0.103	#NUM!	1/39 (3%)	0/39 (0%)	3/39 (8%)	35/39 (90%)	MAPK1,MAPK14,SORBS1,VCL
Phagosome Formation	0.65	0.103	0	2/39 (5%)	0/39 (0%)	2/39 (5%)	35/39 (90%)	MAPK1,MYL7,MYLK3,TTN
Opioid Signaling Pathway	0.65	0.103	1	1/39 (3%)	0/39 (0%)	3/39 (8%)	35/39 (90%)	CAMK2D,MAPK1,RYR2,TH
TREM1 Signaling	0.642	0.25	#NUM!	0/4 (0%)	0/4 (0%)	1/4 (25%)	3/4 (75%)	MAPK1
Lymphotoxin β Receptor Signaling	0.642	0.25	#NUM!	0/4 (0%)	0/4 (0%)	1/4 (25%)	3/4 (75%)	MAPK1
Small Cell Lung Cancer Signaling	0.642	0.25	#NUM!	1/4 (25%)	0/4 (0%)	0/4 (0%)	3/4 (75%)	HDAC2
MIF-mediated Glucocorticoid Regulation	0.642	0.25	#NUM!	0/4 (0%)	0/4 (0%)	1/4 (25%)	3/4 (75%)	MAPK1
Cell Cycle: G2/M DNA Damage Checkpoint Regulation	0.642	0.25	#NUM!	0/4 (0%)	0/4 (0%)	1/4 (25%)	3/4 (75%)	TOP2B
Insulin Secretion Signaling Pathway	0.623	0.1	1	1/40 (3%)	0/40 (0%)	3/40 (8%)	36/40 (90%)	CAMK2D,MAPK1,MAPK14,RYR2
Acute Phase Response Signaling	0.618	0.133	#NUM!	1/15 (7%)	0/15 (0%)	1/15 (7%)	13/15 (87%)	MAPK1,MAPK14
CCR3 Signaling in Eosinophils	0.618	0.133	#NUM!	1/15 (7%)	0/15 (0%)	1/15 (7%)	13/15 (87%)	MAPK1,MAPK14
Production of Nitric Oxide and Reactive Oxygen Species in Macrophages	0.618	0.133	#NUM!	1/15 (7%)	0/15 (0%)	1/15 (7%)	13/15 (87%)	MAPK1,MAPK14
PI3K Signaling in B Lymphocytes	0.618	0.133	#NUM!	0/15 (0%)	0/15 (0%)	2/15 (13%)	13/15 (87%)	CAMK2D,MAPK1
Gαq Signaling	0.618	0.133	#NUM!	1/15 (7%)	0/15 (0%)	1/15 (7%)	13/15 (87%)	GYS1,MAPK1
T Cell Receptor Signaling	0.618	0.133	#NUM!	1/15 (7%)	0/15 (0%)	1/15 (7%)	13/15 (87%)	MAPK1,MAPK14
Epithelial Adherens Junction Signaling	0.595	0.107	#NUM!	2/28 (7%)	0/28 (0%)	1/28 (4%)	25/28 (89%)	MYL7,TNS1,VCL
Clathrin-mediated Endocytosis Signaling	0.577	0.125	#NUM!	1/16 (6%)	0/16 (0%)	1/16 (6%)	14/16 (88%)	AAK1,CTTN
Reelin Signaling in Neurons	0.577	0.125	#NUM!	0/16 (0%)	0/16 (0%)	2/16 (13%)	14/16 (88%)	CAMK2D,MAPK1
Molecular Mechanisms of Cancer	0.575	0.0952	#NUM!	2/42 (5%)	0/42 (0%)	2/42 (5%)	38/42 (90%)	CAMK2D,HDAC2,MAPK1,MAPK14
Regulation of IL-2 Expression in Activated and Anergic T Lymphocytes	0.558	0.2	#NUM!	0/5 (0%)	0/5 (0%)	1/5 (20%)	4/5 (80%)	MAPK1
BER (Base Excision Repair) Pathway	0.558	0.2	#NUM!	0/5 (0%)	0/5 (0%)	1/5 (20%)	4/5 (80%)	MAPK1
GNRH Signaling	0.539	0.1	#NUM!	1/30 (3%)	0/30 (0%)	2/30 (7%)	27/30 (90%)	CAMK2D,MAPK1,MAPK14
Phospholipase C Signaling	0.513	0.0968	#NUM!	2/31 (6%)	0/31 (0%)	1/31 (3%)	28/31 (90%)	HDAC2,MAPK1,MYL7
Gα12/13 Signaling	0.504	0.111	#NUM!	1/18 (6%)	0/18 (0%)	1/18 (6%)	16/18 (89%)	MAPK1,MYL7
PAK Signaling	0.504	0.111	#NUM!	1/18 (6%)	0/18 (0%)	1/18 (6%)	16/18 (89%)	MAPK1,MYL7
Inhibition of ARE-Mediated mRNA Degradation Pathway	0.504	0.111	#NUM!	1/18 (6%)	0/18 (0%)	1/18 (6%)	16/18 (89%)	MAPK1,MAPK14
p53 Signaling	0.491	0.167	#NUM!	1/6 (17%)	0/6 (0%)	0/6 (0%)	5/6 (83%)	MAPK14
Role of Pattern Recognition Receptors in Recognition of Bacteria and Viruses	0.491	0.167	#NUM!	0/6 (0%)	0/6 (0%)	1/6 (17%)	5/6 (83%)	MAPK1
Oncostatin M Signaling	0.491	0.167	#NUM!	0/6 (0%)	0/6 (0%)	1/6 (17%)	5/6 (83%)	MAPK1
DNA Methylation and Transcriptional Repression Signaling	0.491	0.167	#NUM!	1/6 (17%)	0/6 (0%)	0/6 (0%)	5/6 (83%)	HDAC2
Estrogen-Dependent Breast Cancer Signaling	0.491	0.167	#NUM!	0/6 (0%)	0/6 (0%)	1/6 (17%)	5/6 (83%)	MAPK1
Glioma Invasiveness Signaling	0.491	0.167	#NUM!	0/6 (0%)	0/6 (0%)	1/6 (17%)	5/6 (83%)	MAPK1
Cyclins and Cell Cycle Regulation	0.491	0.167	#NUM!	1/6 (17%)	0/6 (0%)	0/6 (0%)	5/6 (83%)	HDAC2
Role of IL-17F in Allergic Inflammatory Airway Diseases	0.491	0.167	#NUM!	0/6 (0%)	0/6 (0%)	1/6 (17%)	5/6 (83%)	MAPK1
Role of JAK1 and JAK3 in γc Cytokine Signaling	0.491	0.167	#NUM!	0/6 (0%)	0/6 (0%)	1/6 (17%)	5/6 (83%)	MAPK1
Unfolded protein response	0.491	0.167	#NUM!	1/6 (17%)	0/6 (0%)	0/6 (0%)	5/6 (83%)	HSPA4
SPINK1 General Cancer Pathway	0.491	0.167	#NUM!	0/6 (0%)	0/6 (0%)	1/6 (17%)	5/6 (83%)	MAPK1
Neuropathic Pain Signaling In Dorsal Horn Neurons	0.472	0.105	#NUM!	0/19 (0%)	0/19 (0%)	2/19 (11%)	17/19 (89%)	CAMK2D,MAPK1
VEGF Signaling	0.472	0.105	#NUM!	0/19 (0%)	0/19 (0%)	2/19 (11%)	17/19 (89%)	MAPK1,VCL
Endocannabinoid Neuronal Synapse Pathway	0.472	0.105	#NUM!	1/19 (5%)	0/19 (0%)	1/19 (5%)	17/19 (89%)	MAPK1,MAPK14
α-Adrenergic Signaling	0.444	0.1	#NUM!	1/20 (5%)	0/20 (0%)	1/20 (5%)	18/20 (90%)	GYS1,MAPK1
Melatonin Signaling	0.444	0.1	#NUM!	0/20 (0%)	0/20 (0%)	2/20 (10%)	18/20 (90%)	CAMK2D,MAPK1
Endothelin-1 Signaling	0.444	0.1	#NUM!	1/20 (5%)	0/20 (0%)	1/20 (5%)	18/20 (90%)	MAPK1,MAPK14
Endocannabinoid Developing Neuron Pathway	0.444	0.1	#NUM!	1/20 (5%)	0/20 (0%)	1/20 (5%)	18/20 (90%)	MAPK1,MAPK14
ICOS-ICOSL Signaling in T Helper Cells	0.438	0.143	#NUM!	0/7 (0%)	0/7 (0%)	1/7 (14%)	6/7 (86%)	CAMK2D
Melanoma Signaling	0.438	0.143	#NUM!	0/7 (0%)	0/7 (0%)	1/7 (14%)	6/7 (86%)	MAPK1
Thyroid Cancer Signaling	0.438	0.143	#NUM!	0/7 (0%)	0/7 (0%)	1/7 (14%)	6/7 (86%)	MAPK1
Crosstalk between Dendritic Cells and Natural Killer Cells	0.438	0.143	#NUM!	0/7 (0%)	0/7 (0%)	1/7 (14%)	6/7 (86%)	CAMK2D
Hereditary Breast Cancer Signaling	0.438	0.143	#NUM!	1/7 (14%)	0/7 (0%)	0/7 (0%)	6/7 (86%)	HDAC2
Role of PI3K/AKT Signaling in the Pathogenesis of Influenza	0.438	0.143	#NUM!	0/7 (0%)	0/7 (0%)	1/7 (14%)	6/7 (86%)	MAPK1
T Cell Exhaustion Signaling Pathway	0.438	0.143	#NUM!	0/7 (0%)	0/7 (0%)	1/7 (14%)	6/7 (86%)	MAPK1
IL-8 Signaling	0.417	0.0952	#NUM!	1/21 (5%)	0/21 (0%)	1/21 (5%)	19/21 (90%)	MAPK1,MYL7
Renin-Angiotensin Signaling	0.417	0.0952	#NUM!	1/21 (5%)	0/21 (0%)	1/21 (5%)	19/21 (90%)	MAPK1,MAPK14
CDK5 Signaling	0.417	0.0952	#NUM!	1/21 (5%)	0/21 (0%)	1/21 (5%)	19/21 (90%)	MAPK1,MAPK14
Cholecystokinin/Gastrin-mediated Signaling	0.417	0.0952	#NUM!	1/21 (5%)	0/21 (0%)	1/21 (5%)	19/21 (90%)	MAPK1,MAPK14
Androgen Signaling	0.417	0.0952	#NUM!	1/21 (5%)	0/21 (0%)	1/21 (5%)	19/21 (90%)	HSPA4,MAPK1
Regulation of eIF4 and p70S6K Signaling	0.417	0.0952	#NUM!	1/21 (5%)	0/21 (0%)	1/21 (5%)	19/21 (90%)	MAPK1,MAPK14
NF-κB Activation by Viruses	0.393	0.125	#NUM!	0/8 (0%)	0/8 (0%)	1/8 (13%)	7/8 (88%)	MAPK1
Semaphorin Signaling in Neurons	0.393	0.125	#NUM!	0/8 (0%)	0/8 (0%)	1/8 (13%)	7/8 (88%)	MAPK1
Adipogenesis pathway	0.393	0.125	#NUM!	1/8 (13%)	0/8 (0%)	0/8 (0%)	7/8 (88%)	HDAC2
Iron homeostasis signaling pathway	0.393	0.125	#NUM!	0/8 (0%)	0/8 (0%)	1/8 (13%)	7/8 (88%)	MAPK1
Necroptosis Signaling Pathway	0.393	0.125	#NUM!	0/8 (0%)	0/8 (0%)	1/8 (13%)	7/8 (88%)	CAMK2D
NRF2-mediated Oxidative Stress Response	0.391	0.0909	#NUM!	1/22 (5%)	0/22 (0%)	1/22 (5%)	20/22 (91%)	MAPK1,MAPK14
RAR Activation	0.391	0.0909	#NUM!	1/22 (5%)	0/22 (0%)	1/22 (5%)	20/22 (91%)	MAPK1,MAPK14
CXCR4 Signaling	0.391	0.0909	#NUM!	1/22 (5%)	0/22 (0%)	1/22 (5%)	20/22 (91%)	MAPK1,MYL7
Factors Promoting Cardiogenesis in Vertebrates	0.391	0.0909	#NUM!	1/22 (5%)	0/22 (0%)	1/22 (5%)	20/22 (91%)	CAMK2D,MAPK14
Senescence Pathway	0.391	0.0909	#NUM!	1/22 (5%)	0/22 (0%)	1/22 (5%)	20/22 (91%)	MAPK1,MAPK14
White Adipose Tissue Browning Pathway	0.391	0.0909	#NUM!	1/22 (5%)	0/22 (0%)	1/22 (5%)	20/22 (91%)	MAPK1,MAPK14
Ephrin Receptor Signaling	0.391	0.0909	#NUM!	0/22 (0%)	0/22 (0%)	2/22 (9%)	20/22 (91%)	MAPK1,SORBS1
Cardiac Hypertrophy Signaling	0.384	0.0811	#NUM!	2/37 (5%)	0/37 (0%)	1/37 (3%)	34/37 (92%)	MAPK1,MAPK14,MYL7
Synaptic Long Term Depression	0.368	0.087	#NUM!	0/23 (0%)	0/23 (0%)	2/23 (9%)	21/23 (91%)	MAPK1,RYR2
PI3K/AKT Signaling	0.368	0.087	#NUM!	1/23 (4%)	0/23 (0%)	1/23 (4%)	21/23 (91%)	GYS1,MAPK1
cAMP-mediated signaling	0.368	0.087	#NUM!	0/23 (0%)	0/23 (0%)	2/23 (9%)	21/23 (91%)	CAMK2D,MAPK1
ILK Signaling	0.367	0.0789	#NUM!	1/38 (3%)	0/38 (0%)	2/38 (5%)	35/38 (92%)	MAPK1,MYL7,VCL
CSDE1 Signaling Pathway	0.354	0.111	#NUM!	1/9 (11%)	0/9 (0%)	0/9 (0%)	8/9 (89%)	CTTN
Thrombopoietin Signaling	0.354	0.111	#NUM!	0/9 (0%)	0/9 (0%)	1/9 (11%)	8/9 (89%)	MAPK1
Angiopoietin Signaling	0.354	0.111	#NUM!	0/9 (0%)	0/9 (0%)	1/9 (11%)	8/9 (89%)	GRB14
CNTF Signaling	0.354	0.111	#NUM!	0/9 (0%)	0/9 (0%)	1/9 (11%)	8/9 (89%)	MAPK1
Antiproliferative Role of Somatostatin Receptor 2	0.354	0.111	#NUM!	0/9 (0%)	0/9 (0%)	1/9 (11%)	8/9 (89%)	MAPK1
Endometrial Cancer Signaling	0.354	0.111	#NUM!	0/9 (0%)	0/9 (0%)	1/9 (11%)	8/9 (89%)	MAPK1
GDNF Family Ligand-Receptor Interactions	0.354	0.111	#NUM!	0/9 (0%)	0/9 (0%)	1/9 (11%)	8/9 (89%)	MAPK1
IL-2 Signaling	0.354	0.111	#NUM!	0/9 (0%)	0/9 (0%)	1/9 (11%)	8/9 (89%)	MAPK1
JAK/STAT Signaling	0.354	0.111	#NUM!	0/9 (0%)	0/9 (0%)	1/9 (11%)	8/9 (89%)	MAPK1
Neurotrophin/TRK Signaling	0.354	0.111	#NUM!	0/9 (0%)	0/9 (0%)	1/9 (11%)	8/9 (89%)	MAPK1
NF-κB Signaling	0.354	0.111	#NUM!	1/9 (11%)	0/9 (0%)	0/9 (0%)	8/9 (89%)	HDAC2
Synaptogenesis Signaling Pathway	0.349	0.0769	#NUM!	1/39 (3%)	0/39 (0%)	2/39 (5%)	36/39 (92%)	CAMK2D,MAPK1,MAPK14
Synaptic Long Term Potentiation	0.346	0.0833	#NUM!	0/24 (0%)	0/24 (0%)	2/24 (8%)	22/24 (92%)	CAMK2D,MAPK1
Cardiac β-adrenergic Signaling	0.346	0.0833	#NUM!	1/24 (4%)	0/24 (0%)	1/24 (4%)	22/24 (92%)	ATP2A2,RYR2
Endocannabinoid Cancer Inhibition Pathway	0.326	0.08	#NUM!	1/25 (4%)	0/25 (0%)	1/25 (4%)	23/25 (92%)	MAPK1,MAPK14
IL-3 Signaling	0.321	0.1	#NUM!	0/10 (0%)	0/10 (0%)	1/10 (10%)	9/10 (90%)	MAPK1
fMLP Signaling in Neutrophils	0.321	0.1	#NUM!	0/10 (0%)	0/10 (0%)	1/10 (10%)	9/10 (90%)	MAPK1
Role of NANOG in Mammalian Embryonic Stem Cell Pluripotency	0.321	0.1	#NUM!	0/10 (0%)	0/10 (0%)	1/10 (10%)	9/10 (90%)	MAPK1
Growth Hormone Signaling	0.321	0.1	#NUM!	0/10 (0%)	0/10 (0%)	1/10 (10%)	9/10 (90%)	MAPK1
VEGF Family Ligand-Receptor Interactions	0.321	0.1	#NUM!	0/10 (0%)	0/10 (0%)	1/10 (10%)	9/10 (90%)	MAPK1
Ephrin B Signaling	0.321	0.1	#NUM!	0/10 (0%)	0/10 (0%)	1/10 (10%)	9/10 (90%)	MAPK1
Pyridoxal 5'-phosphate Salvage Pathway	0.321	0.1	#NUM!	0/10 (0%)	0/10 (0%)	1/10 (10%)	9/10 (90%)	MAPK1
WNT/β-catenin Signaling	0.321	0.1	#NUM!	0/10 (0%)	0/10 (0%)	1/10 (10%)	9/10 (90%)	GJA1
Cancer Drug Resistance By Drug Efflux	0.321	0.1	#NUM!	0/10 (0%)	0/10 (0%)	1/10 (10%)	9/10 (90%)	MAPK1
Corticotropin Releasing Hormone Signaling	0.306	0.0769	#NUM!	1/26 (4%)	0/26 (0%)	1/26 (4%)	24/26 (92%)	MAPK1,MAPK14
Aldosterone Signaling in Epithelial Cells	0.306	0.0769	#NUM!	1/26 (4%)	0/26 (0%)	1/26 (4%)	24/26 (92%)	HSPA4,MAPK1
G-Protein Coupled Receptor Signaling	0.306	0.0769	#NUM!	0/26 (0%)	0/26 (0%)	2/26 (8%)	24/26 (92%)	CAMK2D,MAPK1
Regulation of Actin-based Motility by Rho	0.292	0.0909	#NUM!	1/11 (9%)	0/11 (0%)	0/11 (0%)	10/11 (91%)	MYL7
Prolactin Signaling	0.292	0.0909	#NUM!	0/11 (0%)	0/11 (0%)	1/11 (9%)	10/11 (91%)	MAPK1
Renal Cell Carcinoma Signaling	0.292	0.0909	#NUM!	0/11 (0%)	0/11 (0%)	1/11 (9%)	10/11 (91%)	MAPK1
Sphingosine-1-phosphate Signaling	0.292	0.0909	#NUM!	0/11 (0%)	0/11 (0%)	1/11 (9%)	10/11 (91%)	MAPK1
Systemic Lupus Erythematosus Signaling	0.292	0.0909	#NUM!	0/11 (0%)	0/11 (0%)	1/11 (9%)	10/11 (91%)	MAPK1
RAC Signaling	0.292	0.0909	#NUM!	0/11 (0%)	0/11 (0%)	1/11 (9%)	10/11 (91%)	MAPK1
ERB2-ERBB3 Signaling	0.292	0.0909	#NUM!	0/11 (0%)	0/11 (0%)	1/11 (9%)	10/11 (91%)	MAPK1
ERBB4 Signaling	0.292	0.0909	#NUM!	0/11 (0%)	0/11 (0%)	1/11 (9%)	10/11 (91%)	MAPK1
Regulation of the Epithelial-Mesenchymal Transition Pathway	0.292	0.0909	#NUM!	0/11 (0%)	0/11 (0%)	1/11 (9%)	10/11 (91%)	MAPK1
PPAR Signaling	0.292	0.0909	#NUM!	0/11 (0%)	0/11 (0%)	1/11 (9%)	10/11 (91%)	MAPK1
PDGF Signaling	0.292	0.0909	#NUM!	0/11 (0%)	0/11 (0%)	1/11 (9%)	10/11 (91%)	MAPK1
PFKFB4 Signaling Pathway	0.292	0.0909	#NUM!	0/11 (0%)	0/11 (0%)	1/11 (9%)	10/11 (91%)	MAPK1
HOTAIR Regulatory Pathway	0.292	0.0909	#NUM!	1/11 (9%)	0/11 (0%)	0/11 (0%)	10/11 (91%)	HDAC2
PPARα/RXRα Activation	0.289	0.0741	#NUM!	1/27 (4%)	0/27 (0%)	1/27 (4%)	25/27 (93%)	MAPK1,MAPK14
Acute Myeloid Leukemia Signaling	0.266	0.0833	#NUM!	0/12 (0%)	0/12 (0%)	1/12 (8%)	11/12 (92%)	MAPK1
Apoptosis Signaling	0.266	0.0833	#NUM!	0/12 (0%)	0/12 (0%)	1/12 (8%)	11/12 (92%)	MAPK1
Breast Cancer Regulation by Stathmin1	0.256	0.069	#NUM!	0/29 (0%)	0/29 (0%)	2/29 (7%)	27/29 (93%)	CAMK2D,MAPK1
Autophagy	0.256	0.069	#NUM!	1/29 (3%)	0/29 (0%)	1/29 (3%)	27/29 (93%)	FUNDC1,MAPK1
Aryl Hydrocarbon Receptor Signaling	0.243	0.0769	#NUM!	0/13 (0%)	0/13 (0%)	1/13 (8%)	12/13 (92%)	MAPK1
Caveolar-mediated Endocytosis Signaling	0.243	0.0769	#NUM!	0/13 (0%)	0/13 (0%)	1/13 (8%)	12/13 (92%)	CAVIN1
Remodeling of Epithelial Adherens Junctions	0.243	0.0769	#NUM!	0/13 (0%)	0/13 (0%)	1/13 (8%)	12/13 (92%)	VCL
PTEN Signaling	0.243	0.0769	#NUM!	0/13 (0%)	0/13 (0%)	1/13 (8%)	12/13 (92%)	MAPK1
Dopamine Receptor Signaling	0.243	0.0769	#NUM!	1/13 (8%)	0/13 (0%)	0/13 (0%)	12/13 (92%)	TH
Xenobiotic Metabolism CAR Signaling Pathway	0.243	0.0769	#NUM!	0/13 (0%)	0/13 (0%)	1/13 (8%)	12/13 (92%)	MAPK1
Tumor Microenvironment Pathway	0.243	0.0769	#NUM!	0/13 (0%)	0/13 (0%)	1/13 (8%)	12/13 (92%)	MAPK1
CREB Signaling in Neurons	0.243	0.0667	#NUM!	0/30 (0%)	0/30 (0%)	2/30 (7%)	28/30 (93%)	CAMK2D,MAPK1
Signaling by Rho Family GTPases	0.228	0.0645	#NUM!	1/31 (3%)	0/31 (0%)	1/31 (3%)	29/31 (94%)	MAPK1,MYL7
Gαi Signaling	0.223	0.0714	#NUM!	0/14 (0%)	0/14 (0%)	1/14 (7%)	13/14 (93%)	MAPK1
Sumoylation Pathway	0.223	0.0714	#NUM!	1/14 (7%)	0/14 (0%)	0/14 (0%)	13/14 (93%)	HDAC2
Hepatic Fibrosis / Hepatic Stellate Cell Activation	0.205	0.0667	#NUM!	1/15 (7%)	0/15 (0%)	0/15 (0%)	14/15 (93%)	MYL7
Erythropoietin Signaling Pathway	0.205	0.0667	#NUM!	0/15 (0%)	0/15 (0%)	1/15 (7%)	14/15 (93%)	MAPK1
HGF Signaling	0.205	0.0667	#NUM!	0/15 (0%)	0/15 (0%)	1/15 (7%)	14/15 (93%)	MAPK1
Leptin Signaling in Obesity	0.205	0.0667	#NUM!	0/15 (0%)	0/15 (0%)	1/15 (7%)	14/15 (93%)	MAPK1
Systemic Lupus Erythematosus In T Cell Signaling Pathway	0.205	0.0667	#NUM!	0/15 (0%)	0/15 (0%)	1/15 (7%)	14/15 (93%)	MAPK1
Neuregulin Signaling	0	0.0526	#NUM!	0/19 (0%)	0/19 (0%)	1/19 (5%)	18/19 (95%)	MAPK1
Axonal Guidance Signaling	0	0.0455	#NUM!	1/44 (2%)	0/44 (0%)	1/44 (2%)	42/44 (95%)	MAPK1,MYL7
Tight Junction Signaling	0	0.0526	#NUM!	1/38 (3%)	0/38 (0%)	1/38 (3%)	36/38 (95%)	MYL7,VCL
14-3-3-mediated Signaling	0	0.0417	#NUM!	0/24 (0%)	0/24 (0%)	1/24 (4%)	23/24 (96%)	MAPK1
Fcγ Receptor-mediated Phagocytosis in Macrophages and Monocytes	0	0.0625	#NUM!	0/16 (0%)	0/16 (0%)	1/16 (6%)	15/16 (94%)	MAPK1
Role of NFAT in Regulation of the Immune Response	0	0.0625	#NUM!	0/16 (0%)	0/16 (0%)	1/16 (6%)	15/16 (94%)	MAPK1
Cellular Effects of Sildenafil (Viagra)	0	0.0278	#NUM!	1/36 (3%)	0/36 (0%)	0/36 (0%)	35/36 (97%)	MYL7
Relaxin Signaling	0	0.0625	#NUM!	0/16 (0%)	0/16 (0%)	1/16 (6%)	15/16 (94%)	MAPK1
Melanocyte Development and Pigmentation Signaling	0	0.0556	#NUM!	0/18 (0%)	0/18 (0%)	1/18 (6%)	17/18 (94%)	MAPK1
Type II Diabetes Mellitus Signaling	0	0.0556	#NUM!	0/18 (0%)	0/18 (0%)	1/18 (6%)	17/18 (94%)	MAPK1
p70S6K Signaling	0	0.0556	#NUM!	0/18 (0%)	0/18 (0%)	1/18 (6%)	17/18 (94%)	MAPK1
Colorectal Cancer Metastasis Signaling	0	0.05	#NUM!	0/20 (0%)	0/20 (0%)	1/20 (5%)	19/20 (95%)	MAPK1
mTOR Signaling	0	0.0323	#NUM!	0/31 (0%)	0/31 (0%)	1/31 (3%)	30/31 (97%)	MAPK1
G Beta Gamma Signaling	0	0.04	#NUM!	0/25 (0%)	0/25 (0%)	1/25 (4%)	24/25 (96%)	MAPK1
EIF2 Signaling	0	0.05	#NUM!	0/20 (0%)	0/20 (0%)	1/20 (5%)	19/20 (95%)	MAPK1
HER-2 Signaling in Breast Cancer	0	0.0526	#NUM!	0/19 (0%)	0/19 (0%)	1/19 (5%)	18/19 (95%)	MAPK1
Glioblastoma Multiforme Signaling	0	0.0556	#NUM!	0/18 (0%)	0/18 (0%)	1/18 (6%)	17/18 (94%)	MAPK1
P2Y Purigenic Receptor Signaling Pathway	0	0.0556	#NUM!	0/18 (0%)	0/18 (0%)	1/18 (6%)	17/18 (94%)	MAPK1
Dopamine-DARPP32 Feedback in cAMP Signaling	0	0.037	#NUM!	1/27 (4%)	0/27 (0%)	0/27 (0%)	26/27 (96%)	ATP2A2
NGF Signaling	0	0.0588	#NUM!	0/17 (0%)	0/17 (0%)	1/17 (6%)	16/17 (94%)	MAPK1
RHOGDI Signaling	0	0.0357	#NUM!	1/28 (4%)	0/28 (0%)	0/28 (0%)	27/28 (96%)	MYL7
Gap Junction Signaling	0	0.0556	#NUM!	0/36 (0%)	0/36 (0%)	2/36 (6%)	34/36 (94%)	GJA1,MAPK1
eNOS Signaling	0	0.0385	#NUM!	1/26 (4%)	0/26 (0%)	0/26 (0%)	25/26 (96%)	HSPA4
Netrin Signaling	0	0.0526	#NUM!	0/19 (0%)	0/19 (0%)	1/19 (5%)	18/19 (95%)	RYR2
D-myo-inositol-5-phosphate Metabolism	0	0.0476	#NUM!	1/21 (5%)	0/21 (0%)	0/21 (0%)	20/21 (95%)	PPM1K
D-myo-inositol (1,4,5,6)-Tetrakisphosphate Biosynthesis	0	0.0526	#NUM!	1/19 (5%)	0/19 (0%)	0/19 (0%)	18/19 (95%)	PPM1K
Superpathway of Inositol Phosphate Compounds	0	0.0417	#NUM!	1/24 (4%)	0/24 (0%)	0/24 (0%)	23/24 (96%)	PPM1K
D-myo-inositol (3,4,5,6)-tetrakisphosphate Biosynthesis	0	0.0526	#NUM!	1/19 (5%)	0/19 (0%)	0/19 (0%)	18/19 (95%)	PPM1K
3-phosphoinositide Degradation	0	0.0526	#NUM!	1/19 (5%)	0/19 (0%)	0/19 (0%)	18/19 (95%)	PPM1K
3-phosphoinositide Biosynthesis	0	0.05	#NUM!	1/20 (5%)	0/20 (0%)	0/20 (0%)	19/20 (95%)	PPM1K
Agranulocyte Adhesion and Diapedesis	0	0.0588	#NUM!	1/17 (6%)	0/17 (0%)	0/17 (0%)	16/17 (94%)	MYL7
Estrogen Receptor Signaling	0	0.0435	#NUM!	1/46 (2%)	0/46 (0%)	1/46 (2%)	44/46 (96%)	MAPK1,MYL7
ERK/MAPK Signaling	0	0.0294	#NUM!	0/34 (0%)	0/34 (0%)	1/34 (3%)	33/34 (97%)	MAPK1
Protein Ubiquitination Pathway	0	0.0333	#NUM!	1/30 (3%)	0/30 (0%)	0/30 (0%)	29/30 (97%)	HSPA4
Insulin Receptor Signaling	0	0.0625	#NUM!	1/32 (3%)	0/32 (0%)	1/32 (3%)	30/32 (94%)	GYS1,MAPK1
IGF-1 Signaling	0	0.0556	#NUM!	0/18 (0%)	0/18 (0%)	1/18 (6%)	17/18 (94%)	MAPK1
Sirtuin Signaling Pathway	0	0.0385	#NUM!	0/26 (0%)	0/26 (0%)	1/26 (4%)	25/26 (96%)	MAPK1
Apelin Endothelial Signaling Pathway	0	0.0556	#NUM!	0/18 (0%)	0/18 (0%)	1/18 (6%)	17/18 (94%)	MAPK1
Systemic Lupus Erythematosus In B Cell Signaling Pathway	0	0.0556	#NUM!	0/18 (0%)	0/18 (0%)	1/18 (6%)	17/18 (94%)	MAPK1
Xenobiotic Metabolism PXR Signaling Pathway	0	0.0556	#NUM!	0/18 (0%)	0/18 (0%)	1/18 (6%)	17/18 (94%)	CAMK2D
Semaphorin Neuronal Repulsive Signaling Pathway	0	0.04	#NUM!	1/25 (4%)	0/25 (0%)	0/25 (0%)	24/25 (96%)	MYL7
MSP-RON Signaling In Cancer Cells Pathway	0	0.0625	#NUM!	0/16 (0%)	0/16 (0%)	1/16 (6%)	15/16 (94%)	MAPK1
Ferroptosis Signaling Pathway	0	0.0556	#NUM!	0/18 (0%)	0/18 (0%)	1/18 (6%)	17/18 (94%)	MAPK1

## Sheet: Cellular Functions
© 2000-2021 QIAGEN. All rights reserved.
Categories	Functions	Diseases or Functions Annotation	p-value	B-H p-value	Predicted Activation State	Activation z-score	Molecules	# Molecules
Cardiovascular System Development and Function,Embryonic Development,Organ Development,Organismal Development,Tissue Development	cardiogenesis	Cardiogenesis	5.42e-06	0.0121		-0.506	ATP2A2,CAMK2D,DMD,FBN1,GJA1,GYS1,HDAC2,MAPK1,MAPK14,MYBPC3,MYL7,MYLK3,MYOZ2,PLEC,SPEG,SYNPO2L,TCAP,TH,TTN,VCL,XIRP2	21
Cardiovascular System Development and Function,Cell Morphology,Organ Morphology,Organismal Development,Skeletal and Muscular System Development and Function,Tissue Morphology	morphology	Morphology of cardiomyocytes	1.2e-05	0.0121			ATP2A2,CAMK2D,DMD,HDAC2,MAPK1,MAPK14,MYBPC3,MYLK3,MYOZ2,PLEC,RYR2,TH,TTN,VCL	14
Embryonic Development,Organ Development,Organismal Development,Skeletal and Muscular System Development and Function,Tissue Development	development	Development of striated muscle	1.26e-05	0.0121			DMD,GJA1,HDAC2,MAPK14,MYBPC3,MYLK3,MYOZ2,PLEC,SPEG,TCAP,TTN,VCL,XIRP2	13
Cell Morphology,Organ Morphology,Skeletal and Muscular System Development and Function,Tissue Morphology	morphology	Morphology of muscle cells	1.32e-05	0.0121			APOBEC2,ATP2A2,CAMK2D,CAST,DMD,HDAC2,MAPK1,MAPK14,MYBPC3,MYLK3,MYOZ2,PLEC,RYR2,SPEG,SYNM,TCAP,TH,TTN,VCL	19
Cell Morphology,Organ Morphology,Organismal Injury and Abnormalities,Skeletal and Muscular Disorders,Skeletal and Muscular System Development and Function,Tissue Morphology	muscular hypertrophy	Muscular hypertrophy	2.44e-05	0.0177			CAMK2D,CAST,DMD,HDAC2,MAPK1,MAPK14,MYBPC3,MYOZ2,RYR2,SPEG,TCAP,TTN	12
Skeletal and Muscular System Development and Function	morphology	Morphology of muscle	2.89e-05	0.0177			APOBEC2,ATP2A2,CAMK2D,CAST,DMD,FBN1,HDAC2,Hrc,MAPK1,MAPK14,MYBPC3,MYLK3,MYOZ2,PLEC,RYR2,SPEG,SYNM,TCAP,TH,TTN,VCL	21
Cellular Development,Cellular Growth and Proliferation,Embryonic Development,Organ Development,Organismal Development,Skeletal and Muscular System Development and Function,Tissue Development	formation	Formation of muscle cells	4.62e-05	0.0234		-0.762	CAMK2D,DMD,HDAC2,MAPK14,MYBPC3,MYLK3,MYOZ2,PLEC,SPEG,SYNPO2L,TCAP,TTN	12
Cell Morphology,Organismal Injury and Abnormalities	hypertrophy	Hypertrophy of cells	5.1e-05	0.0234			CAMK2D,CAST,DMD,GJA1,HDAC2,MAPK1,MAPK14,MYBPC3,MYOZ2,RYR2,SPEG,TCAP,TTN	13
Skeletal and Muscular Disorders,Skeletal and Muscular System Development and Function	abnormal morphology	Abnormal morphology of muscle	6.82e-05	0.0255			APOBEC2,ATP2A2,CAMK2D,DMD,FBN1,MAPK1,MAPK14,MYBPC3,MYLK3,PLEC,RYR2,SYNM,TH,TTN,VCL	15
Cardiovascular Disease,Cardiovascular System Development and Function,Cell Morphology,Organ Morphology,Organismal Development,Organismal Injury and Abnormalities,Skeletal and Muscular Disorders,Skeletal and Muscular System Development and Function,Tissue Morphology	hypertrophy	Hypertrophy of cardiac muscle	6.94e-05	0.0255			CAMK2D,DMD,HDAC2,MAPK1,MAPK14,MYBPC3,MYOZ2,RYR2,TCAP,TTN	10
Embryonic Development,Organ Development,Organismal Development,Skeletal and Muscular System Development and Function,Tissue Development	formation	Formation of muscle	0.000108	0.0338		-0.391	CAMK2D,DMD,GJA1,HDAC2,MAPK1,MAPK14,MYBPC3,MYLK3,MYOZ2,PLEC,SPEG,SYNPO2L,TCAP,TTN,VCL,XIRP2	16
Cardiovascular System Development and Function,Embryonic Development,Organ Development,Organismal Development,Skeletal and Muscular System Development and Function,Tissue Development	formation	Formation of cardiac muscle	0.000111	0.0338			HDAC2,MAPK14,MYBPC3,MYLK3,PLEC,SPEG,TCAP,TTN,VCL,XIRP2	10
Cell Morphology	enlargement	Enlargement of cells	0.000181	0.0511			CAMK2D,CAST,CTTN,DMD,GJA1,HDAC2,MAPK1,MAPK14,MYBPC3,MYOZ2,RYR2,SPEG,TCAP,TTN	14
Cardiovascular System Development and Function,Cellular Assembly and Organization,Cellular Development,Cellular Growth and Proliferation,Embryonic Development,Organ Development,Organismal Development,Skeletal and Muscular System Development and Function,Tissue Development	formation	Formation of myofibrils	0.000299	0.0744			CAMK2D,DMD,MYBPC3,MYLK3,MYOZ2,SYNPO2L,TCAP,TTN	8
Cancer,Organismal Injury and Abnormalities	malignant neoplasm of connective or soft tissue of abdomen	Malignant neoplasm of connective or soft tissue of abdomen	0.000306	0.0744			FBN1,LIMD1,MAPK1,MYOZ2,OSBP2,PCYT1A,PLEC,RGL2,RYR2,SYNPO2,TH,TOP2B,TTN	13
Cardiovascular System Development and Function,Organ Development,Organ Morphology	contraction	Contraction of heart	0.000333	0.0744			ATP2A2,CAMK2D,DMD,GJA1,Hrc,MYBPC3,MYL7,RYR2,TCAP,TH,TTN	11
Cardiovascular System Development and Function	response	Response of heart	0.000345	0.0744	Increased	2.213	ATP2A2,CAMK2D,Hrc,MYBPC3,MYLK3,TTN	6
Cardiovascular Disease,Cardiovascular System Development and Function,Cell Morphology,Organ Morphology,Organismal Development,Organismal Injury and Abnormalities,Skeletal and Muscular Disorders,Skeletal and Muscular System Development and Function,Tissue Morphology	abnormal morphology	Abnormal morphology of cardiomyocytes	0.000384	0.076			ATP2A2,MYBPC3,MYLK3,PLEC,RYR2,TH,TTN,VCL	8
Cardiovascular Disease,Cardiovascular System Development and Function,Organ Morphology,Organismal Development,Organismal Injury and Abnormalities	abnormal morphology	Abnormal morphology of heart ventricle	0.000394	0.076			ATP2A2,DMD,GJA1,HDAC2,MYBPC3,MYLK3,RYR2,SPEG,TNS1,TTN,VCL	11
Cardiovascular Disease,Hereditary Disorder,Organismal Injury and Abnormalities,Skeletal and Muscular Disorders	familial arrhythmogenic right ventricular dysplasia type 1	Familial arrhythmogenic right ventricular dysplasia type 1	0.000427	0.0784			MYBPC3,PLEC,RYR2,TTN	4
Cellular Assembly and Organization,Tissue Development	fibrogenesis	Fibrogenesis	0.000474	0.0829		0.986	ADD1,CAMK2D,CTTN,DMD,FBN1,MAPK1,MAPK14,MYBPC3,MYLK3,MYOZ2,PALLD,SORBS1,SYNM,SYNPO2L,TCAP,TNS1,TTN	17
Cancer,Organismal Injury and Abnormalities,Reproductive System Disease	endometrial mixed tumor	Endometrial mixed tumor	0.000594	0.0926			FBN1,LIMD1,MYOZ2,OSBP2,PCYT1A,PLEC,RGL2,RYR2,SYNPO2,TH,TOP2B,TTN	12
Cardiovascular System Development and Function,Organ Morphology,Organismal Development	morphology	Morphology of heart	0.000599	0.0926			ATP2A2,CAMK2D,CAST,DMD,GJA1,HDAC2,HP1BP3,MAPK1,MAPK14,MYBPC3,MYLK3,MYOZ2,PLEC,RYR2,SPEG,TCAP,TH,TMPO,TNS1,TOP2B,TTN,VCL	22
Cardiovascular Disease,Organismal Injury and Abnormalities,Skeletal and Muscular Disorders	intrinsic cardiomyopathy	Intrinsic cardiomyopathy	0.000637	0.0926			ATP2A2,CAMK2D,CAST,DMD,GJA1,MYBPC3,MYOZ2,PLEC,RYR2,SPEG,TCAP,TMPO,TOP2B,TTN,VCL	15
Cardiovascular Disease,Cardiovascular System Development and Function	abnormal morphology	Abnormal morphology of cardiovascular system	0.000651	0.0926			ATP2A2,CAMK2D,CAST,DMD,FBN1,GJA1,HDAC2,MAPK1,MAPK14,MYBPC3,MYLK3,MYOZ2,PLEC,RYR2,SPEG,TCAP,TH,TMPO,TNS1,TOP2B,TTN,VCL	22
Cardiovascular System Development and Function	morphology	Morphology of cardiovascular system	0.00068	0.0926			ATP2A2,CAMK2D,CAST,DMD,FBN1,GJA1,HDAC2,HP1BP3,MAPK1,MAPK14,MYBPC3,MYLK3,MYOZ2,PLEC,RYR2,SPEG,TCAP,TH,TMPO,TNS1,TOP2B,TTN,VCL	23
Cancer,Organismal Injury and Abnormalities,Reproductive System Disease	uterine sarcoma	Uterine sarcoma	0.000684	0.0926			FBN1,LIMD1,MYOZ2,OSBP2,PCYT1A,PLEC,RGL2,RYR2,SYNPO2,TH,TOP2B,TTN	12
Embryonic Development,Organismal Development	development	Development of body trunk	0.000706	0.0926		0.614	ATP2A2,CAMK2D,DMD,FBN1,GJA1,GYS1,HDAC2,HP1BP3,MAPK1,MAPK14,MYBPC3,MYL7,MYLK3,MYOZ2,PLEC,SPEG,SYNPO2L,TCAP,TH,TTN,VCL,XIRP2	22
Cardiovascular Disease,Cardiovascular System Development and Function,Organ Morphology,Organismal Development,Organismal Injury and Abnormalities	abnormal morphology	Abnormal morphology of left ventricle	0.000759	0.096			ATP2A2,DMD,MYBPC3,MYLK3,RYR2,SPEG,TTN,VCL	8
Organismal Development,Organismal Injury and Abnormalities	abnormal morphology	Abnormal morphology of thoracic cavity	0.000831	0.0974			ATP2A2,CAMK2D,CAST,DMD,FBN1,GJA1,HDAC2,MAPK1,MAPK14,MYBPC3,MYLK3,MYOZ2,PLEC,RYR2,SPEG,TCAP,TH,TMPO,TNS1,TOP2B,TTN,VCL	22
Cardiovascular Disease,Cardiovascular System Development and Function,Organ Morphology,Organismal Development,Organismal Injury and Abnormalities	abnormal morphology	Abnormal morphology of heart	0.000855	0.0974			ATP2A2,CAMK2D,CAST,DMD,GJA1,HDAC2,MAPK1,MAPK14,MYBPC3,MYLK3,MYOZ2,PLEC,RYR2,SPEG,TCAP,TH,TMPO,TNS1,TOP2B,TTN,VCL	21
Cell Morphology	orientation	Orientation of fibroblast cell lines	0.0009	0.0974			PALLD,TNS1,VCL	3
Cell Cycle,Cellular Assembly and Organization,Cellular Function and Maintenance,DNA Replication, Recombination, and Repair	organization	Organization of chromatin	0.0009	0.0974			HDAC2,HMGN1,NUCKS1	3
Skeletal and Muscular Disorders	damage	Damage of muscle	0.000929	0.0974		0.092	DMD,HDAC2,MAPK1,PLEC,SPEG,SYNM	6
Organ Morphology,Skeletal and Muscular System Development and Function,Tissue Morphology	quantity	Quantity of muscle cells	0.000929	0.0974		0.816	GJA1,MAPK14,MYBPC3,MYOZ2,SYNM,VCL	6
Cardiovascular Disease,Organismal Injury and Abnormalities	abnormality	Abnormality of heart ventricle	0.000988	0.101			ATP2A2,CAMK2D,CAST,DMD,FBN1,GJA1,HDAC2,MYBPC3,MYLK3,PLEC,RYR2,SPEG,TCAP,TNS1,TTN,VCL	16
Cellular Compromise,Organismal Injury and Abnormalities,Skeletal and Muscular Disorders,Tissue Morphology	degeneration	Degeneration of muscle cells	0.00107	0.102		0.447	DMD,HDAC2,MAPK1,SPEG,SYNM	5
Hereditary Disorder,Organismal Injury and Abnormalities	SCN5A-related disorder	SCN5A-related disorder	0.00107	0.102			FBN1,MYBPC3,RYR2,TTN,VCL	5
Organismal Injury and Abnormalities	hypertrophy	Hypertrophy	0.0011	0.102			ATP2A2,CAMK2D,CAST,DMD,GJA1,HDAC2,MAPK1,MAPK14,MYBPC3,MYLK3,MYOZ2,RYR2,SPEG,TCAP,TTN	15
Skeletal and Muscular System Development and Function	function	Function of muscle	0.00114	0.102		-0.549	APOBEC2,ATP2A2,DMD,GJA1,Hrc,MAPK1,MYBPC3,MYLK3,PLEC,RYR2,SYNM,TTN,VCL	13
Cardiovascular Disease,Organismal Injury and Abnormalities	abnormality	Abnormality of left ventricle	0.00117	0.102			ATP2A2,CAMK2D,CAST,DMD,FBN1,MYBPC3,MYLK3,RYR2,SPEG,TCAP,TTN,VCL	12
Cardiovascular System Development and Function,Organ Development	heart rate	Heart rate	0.00117	0.102		-1.751	ATP2A2,CAMK2D,DMD,GJA1,HDAC2,Hrc,MYBPC3,MYL7,RYR2,TCAP,TH,TTN	12
Cancer,Organismal Injury and Abnormalities,Reproductive System Disease	malignant mixed Mullerian tumor	Malignant mixed Mullerian tumor in endometrium	0.00131	0.11			FBN1,LIMD1,MYOZ2,OSBP2,PCYT1A,PLEC,RGL2,RYR2,SYNPO2,TH,TTN	11
Cardiovascular Disease,Organismal Injury and Abnormalities	dysfunction	Dysfunction of heart	0.00132	0.11			ATP2A2,CAMK2D,CAST,DMD,GRB14,MYBPC3,MYLK3,RYR2,SPEG,TCAP,TTN,VCL	12
Cellular Function and Maintenance,Tissue Development	organization	Organization of muscle cells	0.00142	0.114			ATP2A2,MYBPC3,MYLK3,MYOZ2,SYNPO2L,TCAP,TTN	7
Cardiovascular Disease,Organismal Injury and Abnormalities,Skeletal and Muscular Disorders	dilated or arrhythmogenic cardiomyopathy	Dilated or arrhythmogenic cardiomyopathy	0.00149	0.114			ATP2A2,CAMK2D,CAST,DMD,GJA1,MYBPC3,PLEC,RYR2,SPEG,TCAP,TMPO,TOP2B,TTN,VCL	14
Cardiovascular Disease,Organismal Injury and Abnormalities	left heart disease	Left heart disease	0.0015	0.114			ATP2A2,CAMK2D,DMD,GJA1,MYBPC3,MYLK3,RYR2,SPEG,TCAP,TTN,VCL	11
Developmental Disorder,Organismal Injury and Abnormalities,Skeletal and Muscular Disorders	centronuclear myopathy	Centronuclear myopathy	0.00153	0.114			APOBEC2,PLEC,SPEG,SYNM,TTN	5
Cell-To-Cell Signaling and Interaction,Connective Tissue Development and Function	adhesion	Adhesion of fibroblast cell lines	0.00153	0.114			DMTN,FBN1,MAPK1,PALLD,VCL	5
Cardiovascular System Development and Function,Cellular Assembly and Organization,Cellular Development,Cellular Function and Maintenance,Cellular Growth and Proliferation,Embryonic Development,Organ Development,Organismal Development,Skeletal and Muscular System Development and Function,Tissue Development	organization	Organization of sarcomere	0.00162	0.119			MYBPC3,MYLK3,MYOZ2,SYNPO2L,TCAP,TTN	6
Cardiovascular Disease,Organismal Injury and Abnormalities	ventricular dysfunction	Ventricular dysfunction	0.00171	0.12			ATP2A2,CAMK2D,CAST,DMD,MYBPC3,MYLK3,RYR2,SPEG,TCAP,TTN,VCL	11
Cancer,Gastrointestinal Disease,Organismal Injury and Abnormalities	malignant neoplasm of digestive system	Metastatic malignant neoplasm of digestive system	0.00176	0.12			DMD,GJA1,MAPK1,MYOZ2,PLEC,SYNPO2L,TOP2B	7
Cardiovascular Disease,Cardiovascular System Development and Function,Cell Morphology,Organ Morphology,Organismal Development,Organismal Injury and Abnormalities,Skeletal and Muscular Disorders,Skeletal and Muscular System Development and Function,Tissue Morphology	hypertrophy	Hypertrophy of cardiomyocytes	0.00176	0.12			CAMK2D,DMD,HDAC2,MAPK1,MAPK14,MYBPC3,MYOZ2	7
Cellular Movement,Connective Tissue Development and Function	migration	Migration of fibroblasts	0.00176	0.12		0.564	DMTN,MAPK1,MAPK14,PALLD,PLEC,TNS1,VCL	7
Cardiovascular Disease,Organismal Injury and Abnormalities	right ventricular abnormality	Right ventricular abnormality	0.00201	0.134			ATP2A2,DMD,GJA1,HDAC2,MYBPC3,MYLK3,PLEC,RYR2,TTN	9
Skeletal and Muscular System Development and Function	mass	Mass of muscle	0.00208	0.136			APOBEC2,CAST,DMD,Hrc,SYNM,TTN	6
Cardiovascular Disease,Hereditary Disorder,Organismal Injury and Abnormalities,Skeletal and Muscular Disorders	familial hypertrophic cardiomyopathy-4	Familial hypertrophic cardiomyopathy-4	0.00215	0.137			MYBPC3,RYR2,TCAP	3
Cardiovascular System Development and Function,Embryonic Development,Organ Development,Organ Morphology,Organismal Development,Tissue Development	morphogenesis	Morphogenesis of heart	0.00217	0.137			GJA1,MYBPC3,MYL7,SYNPO2L,TCAP,TTN,XIRP2	7
Cardiovascular Disease,Hereditary Disorder,Organismal Injury and Abnormalities,Skeletal and Muscular Disorders	Brugada syndrome type 1	Brugada syndrome type 1	0.00222	0.138			FBN1,MYBPC3,RYR2,TTN	4
Cardiovascular Disease,Organismal Injury and Abnormalities,Skeletal and Muscular Disorders	nonischemic cardiomyopathy	Nonischemic cardiomyopathy	0.00234	0.139			DMD,MYBPC3,MYOZ2,PLEC,RYR2,TCAP,TMPO,TTN,VCL	9
Cardiovascular System Development and Function,Organ Morphology,Organismal Development	enlargement	Enlargement of left ventricle	0.00237	0.139			ATP2A2,DMD,MYBPC3,MYLK3,RYR2,SPEG,TTN,VCL	8
Cardiovascular Disease,Hereditary Disorder,Organismal Injury and Abnormalities	familial arrhythmia	Familial arrhythmia	0.00237	0.139			DMD,FBN1,MYBPC3,PLEC,RYR2,TCAP,TTN,VCL	8
Cardiovascular Disease,Cardiovascular System Development and Function,Organ Morphology,Organismal Development,Organismal Injury and Abnormalities	enlargement	Enlargement of heart	0.00238	0.139			ATP2A2,CAMK2D,CAST,DMD,GJA1,HDAC2,MAPK1,MAPK14,MYBPC3,MYLK3,MYOZ2,RYR2,SPEG,TCAP,TMPO,TOP2B,TTN,VCL	18
Cellular Movement,Skeletal and Muscular System Development and Function	cell movement	Cell movement of smooth muscle cells	0.00264	0.146		-0.218	ATP2A2,CAMK2D,CTTN,FBN1,GJA1,MAPK1	6
Cardiovascular Disease,Cardiovascular System Development and Function,Organ Morphology,Organismal Development,Organismal Injury and Abnormalities,Skeletal and Muscular Disorders	left ventricular dilation	Left ventricular dilation	0.00264	0.146			ATP2A2,DMD,MYBPC3,RYR2,SPEG,VCL	6
Cardiovascular System Development and Function,Organ Development,Organ Morphology	cardiac contractility	Cardiac contractility	0.00272	0.146		-0.534	ATP2A2,CAMK2D,DMD,MAPK1,MYBPC3,MYLK3,RYR2,TTN,VCL	9
Cellular Function and Maintenance	organization	Organization of cells	0.0028	0.146			ATP2A2,GJA1,MYBPC3,MYLK3,MYOZ2,SYNPO2L,TCAP,TTN	8
Organismal Injury and Abnormalities	visceromegaly	Visceromegaly	0.00295	0.146			ATP2A2,CAMK2D,CAST,DMD,GJA1,HDAC2,MAPK1,MAPK14,MYBPC3,MYLK3,MYOZ2,RYR2,SPEG,TCAP,TMPO,TNS1,TOP2B,TTN,VCL	19
Hereditary Disorder,Organismal Injury and Abnormalities,Skeletal and Muscular Disorders	hereditary myopathy	Hereditary myopathy	0.00302	0.146			CAST,CAVIN1,DMD,FBN1,GYS1,KIF21A,MYBPC3,MYOZ2,PLEC,RYR2,SAMHD1,SPEG,TCAP,TMPO,TTN,VCL	16
Cardiovascular Disease,Organismal Injury and Abnormalities,Skeletal and Muscular Disorders	myopathy	Myopathy of heart	0.00329	0.146			DMD,MAPK14,MYBPC3,PLEC,RYR2,TCAP,TTN,VCL	8
Cardiovascular Disease,Hereditary Disorder,Organismal Injury and Abnormalities,Skeletal and Muscular Disorders	familial hypertrophic cardiomyopathy	Familial hypertrophic cardiomyopathy	0.00329	0.146			DMD,MYBPC3,MYOZ2,RYR2,TCAP,TMPO,TTN,VCL	8
Cardiovascular Disease,Organismal Injury and Abnormalities	tachycardia	Tachycardia	0.00331	0.146			GJA1,MYBPC3,RYR2,TCAP,TTN,VCL	6
Respiratory System Development and Function	respiration	Respiration of mice	0.00333	0.146			FBN1,NUCKS1,PLEC,TOP2B	4
Cell Morphology,Cellular Movement,Connective Tissue Development and Function	cell spreading	Cell spreading of fibroblasts	0.00333	0.146		1.154	FBN1,PALLD,TNS1,VCL	4
Developmental Disorder,Gastrointestinal Disease,Neurological Disease,Organismal Injury and Abnormalities	Hirschsprung disease	Hirschsprung disease	0.00333	0.146			FBN1,MYBPC3,PGRMC2,VCL	4
Cardiovascular Disease,Cardiovascular System Development and Function,Organ Morphology,Organismal Development,Organismal Injury and Abnormalities,Skeletal and Muscular Disorders	dilated cardiomyopathy	Dilated cardiomyopathy	0.00338	0.146			ATP2A2,CAMK2D,CAST,DMD,GJA1,MYBPC3,RYR2,SPEG,TCAP,TMPO,TOP2B,TTN,VCL	13
Cardiovascular System Development and Function,Organ Morphology,Organismal Development	morphology	Morphology of heart ventricle	0.00371	0.146			ATP2A2,CAMK2D,DMD,GJA1,HDAC2,MYBPC3,MYLK3,RYR2,SPEG,TNS1,TTN,VCL	12
Cardiovascular System Development and Function,Organ Morphology,Organismal Development	morphology	Morphology of right ventricle	0.00375	0.146			ATP2A2,GJA1,HDAC2,MYLK3,SPEG	5
Cellular Compromise	degradation	Degradation of filaments	0.00387	0.146			FBN1,MAPK14	2
Cell Morphology,Cellular Assembly and Organization	size	Size of vesicles	0.00387	0.146			AP3D1,TH	2
Cell Signaling,Vitamin and Mineral Metabolism	leakage	Leakage of Ca2+	0.00387	0.146			CAMK2D,RYR2	2
Cellular Development	dedifferentiation	Dedifferentiation of vascular smooth muscle cells	0.00387	0.146			MAPK1,MAPK14	2
Behavior	aversive behavior	Aversive behavior	0.00387	0.146			FXR2,TH	2
Hair and Skin Development and Function,Organ Morphology	thickness	Thickness of skin	0.00387	0.146			FBN1,GJA1	2
Cancer,Hematological Disease,Immunological Disease,Organismal Injury and Abnormalities	ALK fusion negative peripheral T-cell lymphoma	ALK fusion negative peripheral T-cell lymphoma	0.00387	0.146			HDAC2,TOP2B	2
Cell-To-Cell Signaling and Interaction,Cellular Assembly and Organization	formation	Formation of cell-matrix contacts	0.00387	0.146			CTTN,TNS1	2
Nutritional Disease,Psychological Disorders	hypophagia	Hypophagia	0.00387	0.146			FBN1,TH	2
Cellular Assembly and Organization,Cellular Compromise	depolymerization	Depolymerization of actin	0.00387	0.146			MAPK14,PLEC	2
Endocrine System Disorders,Gastrointestinal Disease,Metabolic Disease,Nutritional Disease,Organismal Injury and Abnormalities	obesity diabetes	Obesity diabetes	0.00387	0.146			CAVIN1,CAVIN2	2
Organ Development,Respiratory System Development and Function	function	Function of lung	0.00387	0.146			FBN1,MAPK14	2
Cell Morphology,Cellular Assembly and Organization,Skeletal and Muscular System Development and Function	structural integrity	Structural integrity of sarcomere	0.00387	0.146			TCAP,TTN	2
Cardiovascular Disease,Organismal Injury and Abnormalities,Skeletal and Muscular Disorders	left ventricular noncompaction	Left ventricular noncompaction	0.00409	0.146			DMD,MYBPC3,RYR2,TCAP,TTN,VCL	6
Organ Morphology,Organismal Injury and Abnormalities,Skeletal and Muscular Disorders,Skeletal and Muscular System Development and Function	abnormal morphology	Abnormal morphology of skeletal muscle	0.00409	0.146			APOBEC2,DMD,FBN1,PLEC,SYNM,TTN	6
Cell Signaling,Small Molecule Biochemistry	synthesis	Synthesis of nitric oxide	0.00409	0.146		0.762	CAVIN2,DMD,GJA1,HSPA4,MAPK1,MAPK14	6
Cellular Assembly and Organization,Cellular Development,Cellular Growth and Proliferation,Embryonic Development,Organ Development,Organismal Development,Skeletal and Muscular System Development and Function,Tissue Development	formation	Formation of myofilaments	0.00411	0.146			MYBPC3,TCAP,TTN	3
Cell Morphology,Cellular Assembly and Organization,Cellular Function and Maintenance	extension	Extension of lamellipodia	0.00411	0.146			CAST,CTTN,VCL	3
Cardiovascular Disease,Cardiovascular System Development and Function,Organ Morphology,Organismal Development,Organismal Injury and Abnormalities	abnormal morphology	Abnormal morphology of trabeculae carne	0.00411	0.146			GJA1,RYR2,TTN	3
Connective Tissue Disorders,Metabolic Disease,Organismal Injury and Abnormalities	lipodystrophy	Lipodystrophy	0.00411	0.146			CAVIN1,FBN1,PCYT1A	3
Cancer,Hematological Disease,Immunological Disease,Organismal Injury and Abnormalities	core binding factor acute myeloid leukemia	Core binding factor acute myeloid leukemia	0.00411	0.146			HDAC2,TOP2B,TTN	3
Cellular Compromise,Organismal Injury and Abnormalities,Skeletal and Muscular Disorders,Tissue Morphology	degeneration	Degeneration of myofiber	0.00411	0.146			DMD,HDAC2,SYNM	3
Organ Morphology,Organismal Injury and Abnormalities,Respiratory Disease,Respiratory System Development and Function,Skeletal and Muscular Disorders,Skeletal and Muscular System Development and Function	abnormal morphology	Abnormal morphology of diaphragm	0.00411	0.146			DMD,FBN1,TTN	3
Cellular Movement	cell movement	Cell movement of connective tissue cells	0.00413	0.146		1.354	DMD,DMTN,FBN1,MAPK1,MAPK14,PALLD,PLEC,TNS1,VCL	9
Cardiovascular Disease,Organismal Injury and Abnormalities	left ventricular dysfunction	Left ventricular dysfunction	0.00415	0.146			ATP2A2,CAMK2D,DMD,MYBPC3,MYLK3,RYR2,SPEG,TCAP,TTN,VCL	10
Cardiovascular Disease,Organismal Injury and Abnormalities	arrhythmia	Arrhythmia	0.00415	0.146			ATP2A2,DMD,FBN1,GJA1,MYBPC3,PLEC,RYR2,TCAP,TTN,VCL	10
Cardiovascular Disease,Hereditary Disorder,Organismal Injury and Abnormalities	familial heart disease	Familial heart disease	0.00445	0.155			DMD,FBN1,GJA1,MYBPC3,MYOZ2,PLEC,RYR2,TCAP,TMPO,TTN,VCL	11
Cellular Movement,Connective Tissue Development and Function	cell movement	Cell movement of fibroblasts	0.00447	0.155		1.06	DMTN,FBN1,MAPK1,MAPK14,PALLD,PLEC,TNS1,VCL	8
Organismal Injury and Abnormalities	degeneration	Organ Degeneration	0.00471	0.16		0.647	DMD,HDAC2,MAPK1,MYBPC3,PCYT1A,PLEC,SPEG,SYNM,TNS1	9
Cardiovascular Disease,Organismal Injury and Abnormalities	failure	Failure of heart	0.00471	0.16		1.501	ATP2A2,CAMK2D,MAPK1,MAPK14,MYBPC3,MYLK3,RYR2,TTN,VCL	9
Cardiovascular System Development and Function,Cellular Function and Maintenance,Organ Development,Skeletal and Muscular System Development and Function,Tissue Development	function	Function of cardiomyocytes	0.00475	0.16			MYBPC3,MYLK3,RYR2,TTN	4
Cardiovascular System Development and Function,Cellular Development,Cellular Growth and Proliferation,Embryonic Development,Organ Development,Organismal Development,Skeletal and Muscular System Development and Function,Tissue Development	generation	Generation of cardiomyocytes	0.005	0.163			HDAC2,MAPK14,MYLK3,SPEG,TCAP,TTN	6
Organ Development,Skeletal and Muscular System Development and Function	function	Function of skeletal muscle	0.005	0.163			APOBEC2,DMD,Hrc,PLEC,SYNM,TTN	6
Cardiovascular Disease,Hereditary Disorder,Organismal Injury and Abnormalities	inherited arrhythmia syndrome	Inherited arrhythmia syndrome	0.005	0.163			FBN1,MYBPC3,RYR2,TCAP,TTN,VCL	6
Cardiovascular Disease,Cardiovascular System Development and Function,Organ Morphology,Organismal Development,Organismal Injury and Abnormalities	hypertrophy	Hypertrophy of heart	0.00503	0.163			ATP2A2,CAMK2D,DMD,HDAC2,MAPK1,MAPK14,MYBPC3,MYLK3,MYOZ2,RYR2,TCAP,TTN	12
Cardiovascular System Development and Function,Organ Morphology,Organismal Development	morphology	Morphology of left ventricle	0.00535	0.172			ATP2A2,CAMK2D,DMD,MYBPC3,MYLK3,RYR2,SPEG,TTN,VCL	9
Skeletal and Muscular System Development and Function	contraction	Muscle contraction	0.00551	0.176			ATP2A2,CAMK2D,CTTN,DMD,MYBPC3,MYL7,RYR2,SORBS1,TCAP,TTN,VCL	11
Cardiovascular Disease,Hereditary Disorder,Organismal Injury and Abnormalities,Skeletal and Muscular Disorders	familial cardiomyopathy	Familial cardiomyopathy	0.00606	0.192			DMD,MYBPC3,MYOZ2,PLEC,RYR2,TCAP,TMPO,TTN,VCL	9
Organ Development,Organ Morphology,Skeletal and Muscular System Development and Function	mass	Mass of skeletal muscle	0.00616	0.193			APOBEC2,DMD,Hrc,SYNM,TTN	5
Cardiovascular Disease,Organismal Injury and Abnormalities,Skeletal and Muscular Disorders	cardiomyopathy	Cardiomyopathy of heart ventricle	0.00627	0.193			DMD,MYBPC3,PLEC,RYR2,TCAP,TTN,VCL	7
Skeletal and Muscular Disorders	abnormality	Abnormality of limb	0.00627	0.193			APOBEC2,ATP2A2,CAST,GJA1,PLEC,SYNM,TMPO	7
Cardiovascular System Development and Function,Embryonic Development,Organ Development,Organ Morphology,Organismal Development,Skeletal and Muscular System Development and Function,Tissue Development	morphogenesis	Morphogenesis of cardiac muscle	0.00655	0.199			MYBPC3,TCAP,TTN,XIRP2	4
Dermatological Diseases and Conditions,Organismal Injury and Abnormalities	keratosis	Keratosis	0.00655	0.199			ATP2A2,CAST,GJA1,HDAC2	4
Neurological Disease,Organismal Injury and Abnormalities	gliosis	Gliosis of brain	0.00686	0.203			CAST,GJA1,GYS1	3
Cancer,Gastrointestinal Disease,Organismal Injury and Abnormalities	growth	Growth of digestive organ tumor	0.00686	0.203			GJA1,MAPK1,MAPK14	3
Cell Morphology,Organ Morphology,Skeletal and Muscular System Development and Function,Tissue Morphology	diameter	Diameter of muscle cells	0.00686	0.203			DMD,PLEC,SYNM	3
Cancer,Organismal Injury and Abnormalities	connective tissue tumor	Connective tissue tumor	0.00702	0.206			AP3D1,CTTN,FBN1,GRB14,HSPA4,LIMD1,MAPK1,MYOZ2,OSBP2,PCYT1A,PLEC,RGL2,RYR2,SYNPO2,TH,TOP2B,TTN	17
Developmental Disorder,Hereditary Disorder,Organismal Injury and Abnormalities,Skeletal and Muscular Disorders	muscular dystrophy	Progressive muscular dystrophy	0.00727	0.211			CAST,DMD,PLEC,SAMHD1,TCAP,TTN	6
Cancer,Organismal Injury and Abnormalities	soft tissue sarcoma cancer	Soft tissue sarcoma	0.00731	0.211			AP3D1,CTTN,FBN1,GRB14,LIMD1,MYOZ2,OSBP2,PCYT1A,PLEC,RGL2,RYR2,SYNPO2,TH,TOP2B,TTN	15
Cellular Movement,Skeletal and Muscular System Development and Function	migration	Migration of smooth muscle cells	0.0077	0.221		-0.218	ATP2A2,CAMK2D,CTTN,GJA1,MAPK1	5
Cancer,Organismal Injury and Abnormalities	mixed neoplasia	Mixed neoplasia	0.00833	0.233			CAST,FBN1,HP1BP3,LIMD1,MYOZ2,OSBP2,PCYT1A,PLEC,RABL6,RGL2,RYR2,SORBS1,SPEG,SYNM,SYNPO2,TFIP11,TH,TOP2B,TTN	19
Cell Morphology	size	Size of cells	0.00841	0.233			ADD1,AP3D1,APOBEC2,DMD,Ehbp1l1,FBN1,MAPK1,MAPK14,PLEC,SORBS1,SYNM,TH,TMPO	13
Cardiovascular System Development and Function,Organ Development,Organ Morphology,Skeletal and Muscular System Development and Function	contraction	Contraction of cardiac muscle	0.00847	0.233			ATP2A2,CAMK2D,DMD,MYBPC3,RYR2,TCAP,TTN	7
Organismal Development,Skeletal and Muscular System Development and Function	morphology	Morphology of limb	0.00864	0.233			APOBEC2,DMD,SYNM,TMPO,TTN,VCL	6
Cell Death and Survival	apoptosis	Apoptosis of myeloid cells	0.00874	0.233		0	CAST,HDAC2,MAPK14,PALLD	4
Cell Cycle	G1 phase	G1 phase	0.00883	0.233			CAMK2D,GJA1,HDAC2,MAPK1,MAPK14,RABL6,SYNM,TMPO	8
Cell Morphology,Cellular Movement	cell spreading	Cell spreading	0.00966	0.233		1.18	CAST,FBN1,MAPK1,MAPK14,PALLD,SORBS1,SYNM,TNS1,VCL	9
Cancer,Hematological Disease,Immunological Disease,Organismal Injury and Abnormalities	diffuse B-cell lymphoma	Diffuse B-cell lymphoma	0.00993	0.233			DMD,FBN1,GYS1,HDAC2,MYL7,RYR2,SAMHD1,SPEG,TNS1,TOP2B,VCL	11
Cardiovascular Disease,Organismal Injury and Abnormalities	aortic occlusive disease	Aortic occlusive disease	0.0105	0.233			ATP2A2,GJA1,TTN	3
Cell Death and Survival	apoptosis	Apoptosis of germ cells	0.0105	0.233			GJA1,HSPA4,OSBP2	3
Dermatological Diseases and Conditions,Organismal Injury and Abnormalities,Skeletal and Muscular Disorders	nail disease	Nail disease	0.0105	0.233			ATP2A2,CAST,PLEC	3
Connective Tissue Disorders,Developmental Disorder,Organismal Injury and Abnormalities,Skeletal and Muscular Disorders	dysplasia	Dysplasia of metaphysis	0.0111	0.233			GJA1,PCYT1A	2
Cellular Assembly and Organization,Cellular Function and Maintenance,Organismal Development	secretion	Secretion of alpha granules	0.0111	0.233			CAST,DMTN	2
Cardiovascular Disease,Organismal Injury and Abnormalities	ascending aortic disorder	Ascending aortic disorder	0.0111	0.233			ATP2A2,FBN1	2
Cancer,Organismal Injury and Abnormalities,Reproductive System Disease	estrogen receptor positive breast cancer	Advanced estrogen receptor positive breast cancer	0.0111	0.233			HDAC2,TOP2B	2
Cardiovascular Disease,Cardiovascular System Development and Function,Organ Morphology,Organismal Development,Organismal Injury and Abnormalities	abnormal morphology	Abnormal morphology of left atrium	0.0111	0.233			MYBPC3,TTN	2
Cell-mediated Immune Response,Cellular Development,Cellular Function and Maintenance,Cellular Growth and Proliferation,Embryonic Development,Hematological System Development and Function,Hematopoiesis,Lymphoid Tissue Structure and Development,Organ Development,Organismal Development,Tissue Development	differentiation	Differentiation of regulatory T lymphocytes	0.0111	0.233			MAPK1,MAPK14	2
Cancer,Neurological Disease,Organismal Injury and Abnormalities	brainstem glioma	Brainstem glioma	0.0111	0.233			HDAC2,TTN	2
Cell Death and Survival,Cellular Compromise	fragmentation	Fragmentation of nucleus	0.0111	0.233			HDAC2,MAPK14	2
Cellular Movement,Hematological System Development and Function,Immune Cell Trafficking,Inflammatory Response	migration	Migration of monocytes	0.0111	0.233			CAMK2D,MAPK14	2
Cellular Assembly and Organization,Cellular Development,Cellular Growth and Proliferation,Embryonic Development,Organ Development,Organismal Development,Skeletal and Muscular System Development and Function,Tissue Development	formation	Formation of thin filaments	0.0111	0.233			TCAP,TTN	2
Cellular Movement	invasion	Invasion of stomach cancer cell lines	0.0111	0.233			CTTN,TMPO	2
Cardiovascular Disease,Cardiovascular System Development and Function,Hereditary Disorder,Organ Morphology,Organismal Development,Organismal Injury and Abnormalities,Skeletal and Muscular Disorders	familial dilated cardiomyopathy with left ventricular noncompaction	Familial dilated cardiomyopathy with left ventricular noncompaction	0.0111	0.233			RYR2,VCL	2
Cellular Movement,Connective Tissue Development and Function	cell movement	Cell movement of dermal fibroblasts	0.0111	0.233			FBN1,PLEC	2
Cancer,Organismal Injury and Abnormalities,Reproductive System Disease	post menopausal hormone receptor positive breast cancer	Post menopausal hormone receptor positive breast cancer	0.0111	0.233			HDAC2,TOP2B	2
Cell-To-Cell Signaling and Interaction	permeability	Permeability of intercellular junctions	0.0111	0.233			GJA1,MYLK3	2
Cardiovascular System Development and Function,Organ Development,Skeletal and Muscular System Development and Function	function	Function of cardiac muscle	0.0113	0.233		-0.549	ATP2A2,DMD,MAPK1,MYBPC3,MYLK3,RYR2,TTN,VCL	8
Cellular Assembly and Organization	sliding	Sliding of myofilaments	0.0114	0.233			DMD,MYBPC3,TCAP,TTN	4
Connective Tissue Development and Function,Hematological System Development and Function,Hematopoiesis,Organismal Development,Tissue Morphology	quantity	Quantity of erythroid precursor cells	0.0114	0.233		-0.762	ADD1,DMTN,MAPK14,TMPO	4
Cardiovascular Disease,Cardiovascular System Development and Function,Embryonic Development,Organ Development,Organ Morphology,Organismal Development,Organismal Injury and Abnormalities,Tissue Development	abnormal morphology	Abnormal morphology of ventricular septum	0.0114	0.233			ATP2A2,HDAC2,MYBPC3,MYLK3	4
Cardiovascular Disease,Organismal Injury and Abnormalities	ventricular tachycardia	Ventricular tachycardia	0.0115	0.233			MYBPC3,RYR2,TCAP,TTN,VCL	5
Cardiovascular Disease,Hereditary Disorder,Metabolic Disease,Organismal Injury and Abnormalities	hereditary Wolff-Parkinson-White syndrome	Hereditary Wolff-Parkinson-White syndrome	0.0115	0.233			MYBPC3,RYR2,TCAP,TTN,VCL	5
Cardiovascular Disease,Hereditary Disorder,Organismal Injury and Abnormalities,Skeletal and Muscular Disorders	familial left ventricular noncompaction	Familial left ventricular noncompaction	0.0115	0.233			DMD,MYBPC3,RYR2,TTN,VCL	5
Cancer,Organismal Injury and Abnormalities	sarcoma	Sarcoma	0.0118	0.233			AP3D1,CTTN,FBN1,GRB14,HSPA4,LIMD1,MYOZ2,OSBP2,PCYT1A,PLEC,RGL2,RYR2,SYNPO2,TH,TOP2B,TTN	16
Cancer,Organismal Injury and Abnormalities	extraadrenal retroperitoneal tumor	Extraadrenal retroperitoneal tumor	0.0125	0.233			AAK1,ADD1,AP3D1,API5,CAVIN1,CTTN,DMD,DMTN,FBN1,GJA1,HDAC2,HNRNPUL1,HSPA4,KIF21A,LIMD1,MAPK1,MAPK14,MYBPC3,OSBP2,PALLD,PLEC,PPP6R1,RYR2,SPEG,SYNM,SYNPO2L,TFIP11,TH,TMPO,TNS1,TOP2B,TTN,VCL,XIRP2	34
Cellular Assembly and Organization,Tissue Development	formation	Formation of filaments	0.0134	0.233		0.749	ADD1,CTTN,FBN1,MAPK1,MYBPC3,PALLD,SORBS1,SYNM,SYNPO2L,TCAP,TNS1,TTN	12
Cardiovascular System Development and Function,Organ Development	growth	Growth of heart	0.0139	0.233		0.243	GJA1,HDAC2,MAPK1,MAPK14,TTN	5
Molecular Transport	transport	Transport of divalent cations	0.0139	0.233			AP3D1,ATP2A2,CAMK2D,GJA1,RYR2	5
Cardiovascular Disease,Cardiovascular System Development and Function,Organ Morphology,Organismal Development	mass	Mass of heart	0.0139	0.233			ATP2A2,CAMK2D,HP1BP3,MYBPC3,MYLK3,TTN	6
Cell-To-Cell Signaling and Interaction	adhesion	Adhesion of connective tissue cells	0.0139	0.233			DMTN,FBN1,MAPK1,PALLD,PLEC,VCL	6
Cardiovascular System Development and Function,Organ Morphology,Organismal Development,Skeletal and Muscular System Development and Function	morphology	Morphology of myocardium	0.0139	0.233			MAPK1,MAPK14,MYBPC3,RYR2,TTN,VCL	6
Cardiovascular Disease,Organismal Injury and Abnormalities	heart conduction disorder	Heart conduction disorder	0.0139	0.233			DMD,MYBPC3,RYR2,TCAP,TTN,VCL	6
Cardiovascular Disease,Hereditary Disorder,Organismal Injury and Abnormalities	familial ventricular arrhythmia	Familial ventricular arrhythmia	0.0144	0.233			MYBPC3,RYR2,TTN,VCL	4
Cardiovascular Disease,Organismal Injury and Abnormalities	long-QT syndrome	Long-QT syndrome	0.0144	0.233			MYBPC3,RYR2,TTN,VCL	4
Cellular Assembly and Organization,Cellular Function and Maintenance	formation	Formation of phagosomes	0.0144	0.233			CAST,HDAC2,PALLD,SYNPO2	4
Cancer,Hematological Disease,Immunological Disease,Organismal Injury and Abnormalities	acute myeloid leukemia not otherwise specified	Acute myeloid leukemia not otherwise specified	0.0144	0.233			DMD,TOP2B,TTN,XIRP2	4
Cardiovascular System Development and Function,Organ Development,Organ Morphology,Skeletal and Muscular System Development and Function	contractility	Contractility of cardiac muscle	0.0145	0.233		-0.534	ATP2A2,DMD,MAPK1,MYBPC3,MYLK3,TTN,VCL	7
Skeletal and Muscular Disorders	myopathy	Progressive myopathy	0.0145	0.233			CAST,DMD,HDAC2,PLEC,SAMHD1,TCAP,TTN	7
Cardiovascular Disease,Cardiovascular System Development and Function,Hereditary Disorder,Organ Morphology,Organismal Development,Organismal Injury and Abnormalities,Skeletal and Muscular Disorders	familial dilated cardiomyopathy	Familial dilated cardiomyopathy	0.0145	0.233			DMD,MYBPC3,RYR2,TCAP,TMPO,TTN,VCL	7
Cardiovascular Disease,Hereditary Disorder,Organismal Injury and Abnormalities	familial cardiovascular disease	Familial cardiovascular disease	0.0145	0.233			DMD,FBN1,GJA1,MYBPC3,MYOZ2,PLEC,RYR2,TCAP,TH,TMPO,TTN,VCL	12
Cellular Movement	transmigration	Transmigration of blood cells	0.015	0.233			CAMK2D,GJA1,MYLK3	3
Cancer	hyperplasia	Hyperplasia of epithelial tissue	0.015	0.233			ATP2A2,HDAC2,MAPK14	3
Dermatological Diseases and Conditions,Organismal Injury and Abnormalities	hyperkeratosis	Hyperkeratosis	0.015	0.233			ATP2A2,GJA1,HDAC2	3
Organismal Development,Skeletal and Muscular System Development and Function	mass	Mass of hindlimb muscle	0.015	0.233			APOBEC2,DMD,TTN	3
Cellular Development,Cellular Growth and Proliferation,Reproductive System Development and Function	proliferation	Proliferation of gonadal cell lines	0.015	0.233			CAST,PCYT1A,RYR2	3
Cell Morphology,Organ Development,Organ Morphology,Skeletal and Muscular System Development and Function,Tissue Morphology	size	Size of skeletal muscle cells	0.015	0.233			APOBEC2,DMD,PLEC	3
Cardiovascular System Development and Function,Organ Morphology	dilation	Dilation of heart ventricle	0.015	0.233			CAMK2D,CAST,MYBPC3	3
Cardiovascular Disease,Hereditary Disorder,Organismal Injury and Abnormalities	familial ventricular tachycardia	Familial ventricular tachycardia	0.015	0.233			MYBPC3,RYR2,TTN	3
Organismal Development	morphology	Morphology of body cavity	0.0156	0.233			ATP2A2,CAMK2D,CAST,DMD,FBN1,GJA1,HDAC2,HP1BP3,MAPK1,MAPK14,MYBPC3,MYLK3,MYOZ2,PLEC,RYR2,SPEG,TCAP,TH,TMPO,TNS1,TOP2B,TTN,VCL	23
Cellular Development,Connective Tissue Development and Function,Tissue Development	differentiation	Differentiation of bone cells	0.016	0.233		0.513	ATP2A2,FBN1,GJA1,LIMD1,MAPK1,MAPK14	6
Cardiovascular Disease,Cardiovascular System Development and Function,Organ Morphology,Organismal Development,Organismal Injury and Abnormalities	abnormal morphology	Abnormal morphology of ventricular wall	0.0165	0.233			ATP2A2,GJA1,HDAC2,MYBPC3,MYLK3	5
Cancer,Organismal Injury and Abnormalities	malignant neoplasm of retroperitoneum	Malignant neoplasm of retroperitoneum	0.0166	0.233			AAK1,AP3D1,API5,CAVIN1,CTTN,DMD,DMTN,FBN1,GJA1,HDAC2,HNRNPUL1,KIF21A,LIMD1,MAPK1,MAPK14,MYBPC3,OSBP2,PALLD,PLEC,PPP6R1,RYR2,SPEG,SYNM,SYNPO2L,TH,TMPO,TNS1,TOP2B,TTN,VCL,XIRP2	31
Cancer,Endocrine System Disorders,Gastrointestinal Disease,Organismal Injury and Abnormalities	pancreatic adenocarcinoma	Pancreatic adenocarcinoma	0.0173	0.233			AAK1,AP3D1,API5,CTTN,DMD,GJA1,HDAC2,HNRNPUL1,LIMD1,MYBPC3,PALLD,PLEC,PPP6R1,RYR2,SPEG,SYNM,SYNPO2L,TH,TMPO,TNS1,TTN,VCL,XIRP2	23
Embryonic Development,Organ Development,Organismal Development,Skeletal and Muscular System Development and Function,Tissue Development	myogenesis	Myogenesis of skeletal muscle	0.018	0.233			DMD,MAPK14,MYOZ2,TTN	4
Cell Morphology,Cellular Function and Maintenance	permeability	Permeability of cells	0.018	0.233			CAMK2D,CAST,CTTN,DMD	4
Cancer,Hematological Disease,Immunological Disease,Organismal Injury and Abnormalities	non-M3 acute myeloid leukemia	Non-M3 acute myeloid leukemia	0.018	0.233			DMD,TOP2B,TTN,XIRP2	4
Organismal Injury and Abnormalities,Respiratory Disease	bronchopathy	Bronchopathy	0.018	0.233			HDAC2,KIF21A,RYR2,TOP2B	4
Cell Morphology,Organ Morphology,Skeletal and Muscular System Development and Function,Tissue Morphology	morphology	Morphology of skeletal muscle cells	0.018	0.233			APOBEC2,DMD,PLEC,SYNM	4
Organ Morphology,Skeletal and Muscular System Development and Function	morphology	Morphology of skeletal muscle	0.0185	0.233			APOBEC2,DMD,FBN1,Hrc,PLEC,SYNM,TTN	7
Cancer,Gastrointestinal Disease,Organismal Injury and Abnormalities	gastrointestinal tract cancer	Metastatic gastrointestinal tract cancer	0.0195	0.233			DMD,MAPK1,MYOZ2,SYNPO2L,TOP2B	5
Cancer,Hematological Disease,Immunological Disease,Organismal Injury and Abnormalities	type M1 acute myeloid leukemia	Type M1 acute myeloid leukemia	0.0205	0.233			TOP2B,TTN,XIRP2	3
Cardiovascular System Development and Function,Organ Development	fractional shortening	Fractional shortening of heart	0.0205	0.233			MYLK3,RYR2,SPEG	3
Cardiovascular System Development and Function,Cellular Development,Cellular Function and Maintenance,Cellular Growth and Proliferation,Embryonic Development,Organ Development,Organismal Development,Skeletal and Muscular System Development and Function,Tissue Development	assembly	Assembly of cardiomyocytes	0.0205	0.233			MYLK3,TCAP,TTN	3
Cardiovascular System Development and Function,Organ Development	ejection fraction	Ejection fraction of heart	0.0205	0.233			MAPK14,SPEG,TTN	3
Cardiovascular Disease,Cardiovascular System Development and Function,Organ Morphology,Organismal Development,Organismal Injury and Abnormalities	abnormal morphology	Abnormal morphology of right ventricle	0.0205	0.233			ATP2A2,GJA1,HDAC2	3
Cardiovascular Disease,Hereditary Disorder,Organismal Injury and Abnormalities,Skeletal and Muscular Disorders	paroxysmal familial ventricular fibrillation type 1	Paroxysmal familial ventricular fibrillation type 1	0.0205	0.233			RYR2,TTN,VCL	3
Developmental Disorder,Hereditary Disorder,Organismal Functions,Organismal Injury and Abnormalities,Skeletal and Muscular Disorders	limb-girdle muscular dystrophy type 2	Limb-girdle muscular dystrophy type 2	0.0205	0.233			PLEC,TCAP,TTN	3
Skeletal and Muscular System Development and Function	force generation	Force generation	0.0205	0.233			MYBPC3,TNS1,VCL	3
Dermatological Diseases and Conditions,Organismal Injury and Abnormalities	abnormality of skin morphology	Abnormality of skin morphology	0.021	0.233			ATP2A2,CAST,FBN1,GJA1,HDAC2,PLEC	6
Cell Cycle,Gene Expression	binding	Binding of Sp1 binding site	0.0214	0.233			FBN1,MAPK1	2
Cancer,Endocrine System Disorders,Gastrointestinal Disease,Organismal Injury and Abnormalities	pancreatic ductal adenocarcinoma	Metastatic pancreatic ductal adenocarcinoma	0.0214	0.233			GJA1,PLEC	2
Cancer,Hematological Disease,Immunological Disease,Organismal Injury and Abnormalities	BCL2 rearrangement negative MYC rearrangement negative lymphoma	BCL2 rearrangement negative MYC rearrangement negative lymphoma	0.0214	0.233			HDAC2,TOP2B	2
Carbohydrate Metabolism,Lipid Metabolism,Small Molecule Biochemistry	synthesis	Synthesis of phosphatidylcholine	0.0214	0.233			MAPK1,PCYT1A	2
Cancer,Hematological Disease,Immunological Disease,Organismal Injury and Abnormalities	BCL2 positive MYC positive diffuse large B-cell lymphoma	BCL2 positive MYC positive diffuse large B-cell lymphoma	0.0214	0.233			HDAC2,TOP2B	2
Behavior,Nervous System Development and Function	acoustic startle response	Acoustic startle response	0.0214	0.233			FXR2,HMGN1	2
Cancer,Gastrointestinal Disease,Organismal Injury and Abnormalities,Tumor Morphology	invasion	Invasion of digestive organ tumor	0.0214	0.233			CTTN,MAPK1	2
Cancer,Hematological Disease,Immunological Disease,Organismal Injury and Abnormalities	acute myeloid leukemia with inv(16)	Acute myeloid leukemia with inv(16)	0.0214	0.233			TOP2B,TTN	2
Cell Death and Survival,Skeletal and Muscular Disorders	cell death	Cell death of myofiber	0.0214	0.233			DMD,PLEC	2
Cell Morphology,Organ Morphology,Skeletal and Muscular System Development and Function,Tissue Morphology	diameter	Diameter of skeletal muscle cells	0.0214	0.233			PLEC,SYNM	2
Cellular Assembly and Organization,Cellular Function and Maintenance	formation	Formation of F-actin structure	0.0214	0.233			CTTN,SYNPO2	2
Cancer,Hematological Disease,Immunological Disease,Organismal Injury and Abnormalities	CD20 positive c-MYC positive lymphoma	CD20 positive c-MYC positive lymphoma	0.0214	0.233			HDAC2,TOP2B	2
Neurological Disease,Organismal Injury and Abnormalities	microgliosis	Microgliosis	0.0214	0.233			CAST,GYS1	2
Embryonic Development,Organismal Development,Skeletal and Muscular System Development and Function	morphogenesis	Morphogenesis of embryonic digit	0.0214	0.233			GJA1,HDAC2	2
Organ Development,Organ Morphology,Organismal Development,Skeletal and Muscular System Development and Function	mass	Mass of soleus muscle	0.0214	0.233			APOBEC2,TTN	2
Organ Morphology,Organismal Functions	healing	Healing of skin	0.0214	0.233			DMTN,PLEC	2
Cell Morphology,Organ Morphology,Organismal Development,Organismal Injury and Abnormalities,Renal and Urological Disease,Renal and Urological System Development and Function	hypertrophy	Hypertrophy of mesangial cells	0.0214	0.233			GJA1,MAPK1	2
Cell Morphology	morphology	Morphology of filopodia	0.0214	0.233			CAST,CTTN	2
Cellular Development,Cellular Growth and Proliferation,Connective Tissue Development and Function,Skeletal and Muscular System Development and Function,Tissue Development	formation	Formation of osteoblasts	0.0214	0.233			LIMD1,MAPK14	2
Cancer,Hematological Disease,Immunological Disease,Organismal Injury and Abnormalities	chronic lymphocytic leukemia / small lymphocytic lymphoma	Chronic lymphocytic leukemia / small lymphocytic lymphoma	0.0216	0.233			CTTN,DMD,FBN1,GYS1,RYR2,TNS1,TOP2B,VCL	8
Cell Morphology,Cellular Movement,Connective Tissue Development and Function	cell spreading	Cell spreading of fibroblast cell lines	0.0221	0.233		1.091	CAST,PALLD,SORBS1,VCL	4
Cancer,Gastrointestinal Disease,Organismal Injury and Abnormalities	malignant gastrointestinal neoplasm	Advanced malignant gastrointestinal neoplasm	0.0228	0.233			DMD,MAPK1,MYOZ2,SYNPO2L,TOP2B	5
Cell Morphology,Connective Tissue Development and Function	shape change	Shape change of fibroblast cell lines	0.0228	0.233		0.6	CAST,MAPK14,PALLD,SORBS1,VCL	5
Cellular Movement	cell movement	Cell movement of myeloid cells	0.0238	0.233		0.591	CAMK2D,CAST,CTTN,GJA1,MAPK1,MAPK14,MYLK3,PLEC	8
Cancer,Endocrine System Disorders,Gastrointestinal Disease,Organismal Injury and Abnormalities	pancreatic cancer	Pancreatic cancer	0.0251	0.233			AAK1,AP3D1,API5,CTTN,DMD,GJA1,HDAC2,HNRNPUL1,LIMD1,MYBPC3,PALLD,PLEC,PPP6R1,RYR2,SPEG,SYNM,SYNPO2L,TH,TMPO,TNS1,TOP2B,TTN,VCL,XIRP2	24
Hematological System Development and Function,Tissue Morphology	quantity	Quantity of myeloid cells	0.0258	0.233		-0.055	ADD1,DMD,DMTN,GJA1,MAPK14,SORBS1,TMPO	7
Cardiovascular Disease,Hereditary Disorder,Organismal Injury and Abnormalities,Skeletal and Muscular Disorders	arrhythmogenic right ventricular cardiomyopathy	Arrhythmogenic right ventricular cardiomyopathy	0.0264	0.233			DMD,MYBPC3,PLEC,RYR2,TTN	5
Behavior	conditioning	Conditioning	0.0264	0.233		-0.625	FXR2,HDAC2,MAPK1,MAPK14,TH	5
Cardiovascular Disease,Organismal Injury and Abnormalities	abnormality	Abnormality of atrium	0.0264	0.233			ATP2A2,MYBPC3,TH,TNS1,TTN	5
Cardiovascular Disease,Cardiovascular System Development and Function,Organ Morphology,Organismal Development,Organismal Injury and Abnormalities	abnormal morphology	Abnormal morphology of atrium	0.0267	0.233			MYBPC3,TH,TNS1,TTN	4
Cell Morphology,Tissue Morphology	volume	Volume of cells	0.0267	0.233			ADD1,FBN1,MAPK1,TMPO	4
Cellular Assembly and Organization	formation	Formation of actin bundles	0.027	0.233			ADD1,DMTN,PALLD	3
Dermatological Diseases and Conditions,Immunological Disease,Organismal Injury and Abnormalities	pemphigus vulgaris	Pemphigus vulgaris	0.027	0.233			CAVIN2,CTTN,TNS1	3
Cardiovascular Disease,Cardiovascular System Development and Function,Organ Morphology,Organismal Development	mass	Mass of left ventricle	0.027	0.233			CAMK2D,MYLK3,TTN	3
Hematological Disease,Immunological Disease	abnormal neutrophil count	Abnormal neutrophil count	0.027	0.233			GJA1,MAPK14,TOP2B	3
Cancer,Endocrine System Disorders,Gastrointestinal Disease,Organismal Injury and Abnormalities	metastatic pancreatic cancer	Metastatic pancreatic neoplasm	0.027	0.233			GJA1,PLEC,TOP2B	3
Cancer,Organismal Injury and Abnormalities,Respiratory Disease	bronchopulmonary carcinoma	Bronchopulmonary carcinoma	0.027	0.233			KIF21A,RYR2,TOP2B	3
Cardiovascular Disease,Cardiovascular System Development and Function,Cell Morphology,Cellular Function and Maintenance,Organismal Injury and Abnormalities,Tissue Morphology	permeability	Permeability of endothelial cells	0.027	0.233			CAMK2D,CAST,CTTN	3
Cellular Assembly and Organization,Cellular Compromise	disruption	Disruption of cytoskeleton	0.027	0.233			ADD1,CAST,PLEC	3
Cardiovascular System Development and Function,Organ Development,Organ Morphology,Skeletal and Muscular System Development and Function	relaxation	Relaxation of cardiac muscle	0.027	0.233			ATP2A2,CAMK2D,MYBPC3	3
Organ Morphology,Organismal Development,Organismal Injury and Abnormalities,Renal and Urological Disease,Renal and Urological System Development and Function	nephromegaly	Nephromegaly	0.027	0.233			GJA1,MAPK1,TNS1	3
Cancer,Organismal Injury and Abnormalities	mesothelioma	Mesothelioma	0.027	0.233			HDAC2,RYR2,TOP2B	3
Cancer,Organismal Injury and Abnormalities	BRAF V600 mutation positive malignant solid tumor	Advanced BRAF V600 mutation positive malignant solid tumor	0.027	0.233			HDAC2,MAPK1,TOP2B	3
Cancer,Endocrine System Disorders,Gastrointestinal Disease,Organismal Injury and Abnormalities	pancreatic ductal adenocarcinoma	Pancreatic ductal adenocarcinoma	0.0279	0.233			AAK1,AP3D1,API5,CTTN,DMD,GJA1,HDAC2,LIMD1,MYBPC3,PALLD,PLEC,PPP6R1,RYR2,SPEG,SYNM,SYNPO2L,TH,TMPO,TNS1,TTN,VCL,XIRP2	22
Cellular Movement,Hematological System Development and Function,Immune Cell Trafficking,Inflammatory Response	cell movement	Cell movement of phagocytes	0.0287	0.233		0.384	CAMK2D,CAST,CTTN,GJA1,MAPK1,MAPK14,MYLK3,PLEC	8
Cancer,Endocrine System Disorders,Gastrointestinal Disease,Organismal Injury and Abnormalities	pancreatic tumor	Pancreatic tumor	0.0292	0.233			AAK1,ADD1,AP3D1,API5,CTTN,DMD,GJA1,HDAC2,HNRNPUL1,HSPA4,LIMD1,MYBPC3,PALLD,PLEC,PPP6R1,RYR2,SPEG,SYNM,SYNPO2L,TFIP11,TH,TMPO,TNS1,TOP2B,TTN,VCL,XIRP2	27
Cell Death and Survival,Skeletal and Muscular Disorders	necrosis	Necrosis of muscle	0.0303	0.233		-0.573	CAMK2D,DMD,HDAC2,MAPK1,MAPK14,MYBPC3,MYLK3,PLEC,TTN	9
Cardiovascular Disease,Cardiovascular System Development and Function,Organ Morphology,Organismal Development,Organismal Injury and Abnormalities,Skeletal and Muscular Disorders,Skeletal and Muscular System Development and Function	abnormal morphology	Abnormal morphology of myocardium	0.0304	0.233			MAPK1,MYBPC3,RYR2,TTN,VCL	5
Cellular Development,Cellular Growth and Proliferation,Connective Tissue Development and Function,Tissue Development	development	Development of connective tissue cells	0.0304	0.233			CAST,CTTN,LIMD1,MAPK1,MAPK14	5
Cancer,Hematological Disease,Immunological Disease,Organismal Injury and Abnormalities	peripheral T-cell lymphoma	Peripheral T-cell lymphoma	0.0304	0.233			FBN1,GJA1,HDAC2,TNS1,TOP2B	5
Cancer,Organismal Injury and Abnormalities	extracranial solid tumor	Advanced extracranial solid tumor	0.0315	0.233			DMD,GJA1,HDAC2,MAPK1,MYOZ2,PLEC,SYNPO2L,TOP2B	8
Cellular Movement,Embryonic Development	migration	Migration of embryonic cell lines	0.0318	0.233			CTTN,MAPK14,PALLD,VCL	4
Cellular Development,Cellular Growth and Proliferation,Hematological System Development and Function,Hematopoiesis,Tissue Development	differentiation	Differentiation of megakaryocyte/erythrocyte lineage cell	0.0318	0.233		0.254	HDAC2,MAPK1,MAPK14,PALLD	4
Cell Cycle	G1/S phase transition	G1/S phase transition	0.0318	0.233			CAMK2D,GJA1,MAPK14,RABL6	4
Cell Signaling,Molecular Transport,Vitamin and Mineral Metabolism	transport	Transport of Ca2+	0.0318	0.233			ATP2A2,CAMK2D,GJA1,RYR2	4
Cardiovascular Disease,Cardiovascular System Development and Function,Organ Morphology,Organismal Development,Organismal Injury and Abnormalities	hypertrophy	Hypertrophy of left ventricle	0.0318	0.233			ATP2A2,MYBPC3,MYLK3,TTN	4
Cardiovascular System Development and Function,Cellular Development,Cellular Growth and Proliferation,Embryonic Development,Organ Development,Organismal Development,Skeletal and Muscular System Development and Function,Tissue Development	proliferation	Proliferation of cardiomyocytes	0.0318	0.233		0.577	GJA1,HDAC2,MAPK1,MAPK14	4
Cellular Compromise	degeneration	Degeneration of cells	0.034	0.233		0	DMD,HDAC2,MAPK1,PLEC,SPEG,SYNM	6
Cardiovascular Disease,Organismal Injury and Abnormalities	injury	Injury of heart	0.0342	0.233			GJA1,MAPK1	2
Cardiovascular Disease,Cardiovascular System Development and Function,Cell Morphology,Cell-To-Cell Signaling and Interaction,Cellular Assembly and Organization,Organ Morphology,Organismal Development,Organismal Injury and Abnormalities,Skeletal and Muscular Disorders,Skeletal and Muscular System Development and Function,Tissue Morphology	abnormal morphology	Abnormal morphology of intercalated disks	0.0342	0.233			PLEC,VCL	2
Cancer,Organismal Injury and Abnormalities	unresectable BRAF V600 mutation positive melanoma	Stage III unresectable BRAF V600 mutation positive melanoma	0.0342	0.233			HDAC2,MAPK1	2
Dermatological Diseases and Conditions,Metabolic Disease,Organismal Injury and Abnormalities	xanthoma	Xanthoma	0.0342	0.233			TOP2B,VCL	2
Cellular Function and Maintenance,Molecular Transport	flux	Flux of K+	0.0342	0.233			GJA1,MAPK1	2
Cell Morphology,Cellular Assembly and Organization,Organ Morphology,Skeletal and Muscular System Development and Function,Tissue Morphology	morphology	Morphology of sarcoplasmic reticulum	0.0342	0.233			CAMK2D,RYR2	2
Cancer,Endocrine System Disorders,Organismal Injury and Abnormalities,Reproductive System Disease	ovarian germ cell tumor	Ovarian germ cell tumor	0.0342	0.233			MAPK1,TOP2B	2
Cell Death and Survival	cell death	Cell death of astrocytes	0.0342	0.233			GJA1,MAPK1	2
Cellular Movement	migration	Migration of stomach cancer cell lines	0.0342	0.233			CTTN,TMPO	2
Cell Death and Survival	apoptosis	Apoptosis of male germ cells	0.0342	0.233			HSPA4,OSBP2	2
Cell Death and Survival	apoptosis	Apoptosis of neutrophils	0.0342	0.233			CAST,MAPK14	2
Cell Morphology,Endocrine System Disorders,Organ Morphology,Organismal Injury and Abnormalities,Reproductive System Development and Function,Reproductive System Disease	abnormal morphology	Abnormal morphology of spermatids	0.0342	0.233			HSPA4,OSBP2	2
Cell Morphology,Nervous System Development and Function,Neurological Disease,Tissue Morphology	loss	Loss of axons	0.0342	0.233			CAST,GJA1	2
Developmental Disorder,Hereditary Disorder,Organismal Injury and Abnormalities,Skeletal and Muscular Disorders	congenital myopathy	Autosomal recessive congenital myopathy	0.0342	0.233			PLEC,SPEG	2
Energy Production,Nucleic Acid Metabolism,Small Molecule Biochemistry	binding	Binding of ATP	0.0342	0.233			MAPK1,MAPK14	2
Cancer,Organismal Injury and Abnormalities,Reproductive System Disease	fallopian tube cancer	Recurrent fallopian tube cancer	0.0342	0.233			MAPK1,TOP2B	2
Cancer,Organismal Injury and Abnormalities	stage III melanoma	Unresectable stage III melanoma	0.0342	0.233			HDAC2,MAPK1	2
DNA Replication, Recombination, and Repair	cleavage	Cleavage of DNA	0.0342	0.233			OSBP2,TOP2B	2
Cancer,Neurological Disease,Organismal Injury and Abnormalities	childhood brain tumor	Childhood brain tumor	0.0342	0.233			HDAC2,TOP2B	2
Cancer,Organismal Injury and Abnormalities	cancer	Stage IIIC unresectable cancer	0.0342	0.233			MAPK1,TOP2B	2
Cancer,Organismal Injury and Abnormalities	CD274 positive malignant solid tumor	Metastatic CD274 positive malignant solid tumor	0.0342	0.233			HDAC2,TOP2B	2
Cell Morphology,Embryonic Development	shape change	Shape change of embryonic cell lines	0.0344	0.233			MAPK1,PALLD,VCL	3
Cancer,Organismal Injury and Abnormalities	BRAF V600 mutation positive malignant solid tumor	Metastatic BRAF V600 mutation positive malignant solid tumor	0.0344	0.233			HDAC2,MAPK1,TOP2B	3
Cancer,Dermatological Diseases and Conditions,Hematological Disease,Immunological Disease,Organismal Injury and Abnormalities	cutaneous T-cell lymphoma	Cutaneous T-cell lymphoma	0.0344	0.233			HDAC2,MAPK1,TOP2B	3
Cell Signaling,Molecular Transport,Vitamin and Mineral Metabolism	uptake	Uptake of Ca2+	0.0344	0.233			ATP2A2,CAMK2D,TTN	3
Organismal Injury and Abnormalities	cytosis	Cytosis of blood cells	0.0344	0.233			ADD1,DMTN,MAPK14	3
Cellular Development,Connective Tissue Development and Function,Skeletal and Muscular System Development and Function,Tissue Development	differentiation	Differentiation of osteoclasts	0.0344	0.233			ATP2A2,FBN1,MAPK14	3
Cancer,Gastrointestinal Disease,Organismal Injury and Abnormalities	secondary neoplasm of digestive system	Secondary neoplasm of digestive system	0.0348	0.233			DMD,MAPK1,MYOZ2,SYNPO2L,TOP2B	5
Cell Cycle	G1 phase	Arrest in G1 phase	0.0348	0.233			MAPK1,MAPK14,RABL6,SYNM,TMPO	5
Cancer,Hematological Disease,Immunological Disease,Organismal Injury and Abnormalities	small lymphocytic lymphoma cancer	Small B-cell lymphocytic lymphoma	0.035	0.233			DMD,FBN1,GYS1,RYR2,TNS1,TOP2B,VCL	7
Cancer,Organismal Injury and Abnormalities,Respiratory Disease	squamous cell lung cancer	Lung squamous cell carcinoma	0.0352	0.233			AAK1,CAVIN1,DMD,KIF21A,MAPK1,PLEC,RYR2,SORBS1,SPEG,TOP2B,TTN	11
Cancer,Gastrointestinal Disease,Hepatic System Disease,Organismal Injury and Abnormalities	cancer	Liver cancer	0.0357	0.233			ADD1,AP3D1,API5,ATP2A2,CAST,CAVIN1,CAVIN2,CTTN,DMD,DMTN,FBN1,FXR2,GJA1,GRB14,GYS1,HDAC2,HNRNPUL1,HSPA4,KIF21A,MAPK1,MAPK14,MYBPC3,PALLD,PLEC,PPFIBP1,PPM1K,RALGAPA1,RGL2,RYR2,SAMHD1,SORBS1,SPEG,SYNPO2,TMPO,TNS1,TOP2B,TTN,VCL,XIRP2	39
Cancer,Hematological Disease,Organismal Injury and Abnormalities	mature lymphocytic neoplasm	Mature lymphocytic neoplasm	0.0363	0.233			CAVIN2,CTTN,DMD,FBN1,GJA1,GYS1,HDAC2,MAPK1,MYL7,RYR2,SAMHD1,SPEG,SYNM,TNS1,TOP2B,TTN,VCL,XIRP2	18
Cancer,Gastrointestinal Disease,Hepatic System Disease,Organismal Injury and Abnormalities	liver carcinoma	Liver carcinoma	0.037	0.233			ADD1,AP3D1,API5,ATP2A2,CAST,CAVIN1,CAVIN2,CTTN,DMD,DMTN,FBN1,FXR2,GJA1,GRB14,GYS1,HDAC2,HNRNPUL1,HSPA4,KIF21A,MAPK1,MYBPC3,PALLD,PLEC,PPFIBP1,PPM1K,RALGAPA1,RGL2,RYR2,SAMHD1,SORBS1,SPEG,SYNPO2,TMPO,TNS1,TOP2B,TTN,VCL,XIRP2	38
Cancer,Gastrointestinal Disease,Organismal Injury and Abnormalities	metastatic colorectal cancer	Metastatic colorectal cancer	0.0375	0.233			DMD,MAPK1,MYOZ2,SYNPO2L	4
Cancer,Gastrointestinal Disease,Hepatic System Disease,Organismal Injury and Abnormalities	hepatobiliary system cancer	Hepatobiliary system cancer	0.0391	0.233			ADD1,AP3D1,API5,ATP2A2,CAST,CAVIN1,CAVIN2,CTTN,DMD,DMTN,FBN1,FXR2,GJA1,GRB14,GYS1,HDAC2,HNRNPUL1,HSPA4,KIF21A,MAPK1,MAPK14,MYBPC3,NUCKS1,PALLD,PLEC,PPFIBP1,PPM1K,RABL6,RALGAPA1,RGL2,RYR2,SAMHD1,SORBS1,SPEG,SYNPO2,TMPO,TNS1,TOP2B,TTN,VCL,XIRP2	41
Behavior,Digestive System Development and Function	feeding	Feeding	0.0395	0.233		-1	FBN1,GJA1,MAPK1,NUCKS1,TH	5
Respiratory Disease	lower respiratory tract disorder	Lower respiratory tract disorder	0.0395	0.233			FBN1,HDAC2,KIF21A,RYR2,TOP2B	5
Cancer,Organismal Injury and Abnormalities	metastatic solid tumor	Metastatic solid tumor	0.0406	0.233			DMD,GJA1,HDAC2,MAPK1,MYOZ2,PLEC,SYNPO2L,TOP2B	8
Cellular Development,Cellular Growth and Proliferation,Organ Development,Skeletal and Muscular System Development and Function,Tissue Development	proliferation	Proliferation of muscle cells	0.0421	0.233		1.368	ATP2A2,GJA1,HDAC2,MAPK1,MAPK14,MYBPC3,Sf1	7
Embryonic Development,Hair and Skin Development and Function,Organ Development,Organismal Development,Tissue Development	formation	Formation of skin	0.0421	0.233			ATP2A2,DMTN,GJA1,HDAC2,MAPK14,PALLD	6
Hereditary Disorder,Organismal Injury and Abnormalities,Skeletal and Muscular Disorders	myopathy	Autosomal recessive myopathy	0.0421	0.233			CAVIN1,GYS1,PLEC,SPEG,TCAP,TTN	6
Cellular Movement	invasion	Invasion of fibroblast cell lines	0.0428	0.233			CTTN,MAPK14,VCL	3
Cellular Development,Embryonic Development,Organismal Development,Tissue Development	differentiation	Differentiation of mesenchymal cells	0.0428	0.233			FBN1,MAPK1,MAPK14	3
Cell Death and Survival,Connective Tissue Development and Function	cell viability	Cell viability of fibroblasts	0.0428	0.233			HDAC2,MAPK1,TOP2B	3
Connective Tissue Development and Function,Skeletal and Muscular System Development and Function	remodeling	Remodeling of bone	0.0428	0.233			FBN1,GJA1,VCL	3
Cancer,Organismal Injury and Abnormalities	malignant soft tissue neoplasm	Malignant soft tissue neoplasm	0.0429	0.233			AAK1,ADD1,AP3D1,API5,APOBEC2,ATP2A2,CAST,CAVIN1,CAVIN2,CTTN,DMD,DMTN,FBN1,FXR2,GJA1,GRB14,GYS1,HNRNPUL1,HP1BP3,HSPA4,KIF21A,LIMD1,MAPK1,MAPK14,MYBPC3,MYLK3,MYOZ2,NUCKS1,OSBP2,PALLD,PCYT1A,PGRMC2,PLEC,PPP6R1,RALGAPA1,RGL2,RYR2,SAMHD1,SORBS1,SPEG,SYNM,SYNPO2,SYNPO2L,TFIP11,TH,TMPO,TNS1,TOP2B,TTN,VCL,XIRP2	51
Cellular Movement,Renal and Urological System Development and Function	cell movement	Cell movement of kidney cell lines	0.0437	0.233			ADD1,CTTN,MAPK1,SORBS1	4
Cancer,Gastrointestinal Disease,Organismal Injury and Abnormalities	hepatobiliary carcinoma	Hepatobiliary carcinoma	0.0438	0.233			ADD1,AP3D1,API5,ATP2A2,CAST,CAVIN1,CAVIN2,CTTN,DMD,DMTN,FBN1,FXR2,GJA1,GRB14,GYS1,HDAC2,HNRNPUL1,HSPA4,KIF21A,MAPK1,MYBPC3,NUCKS1,PALLD,PLEC,PPFIBP1,PPM1K,RABL6,RALGAPA1,RGL2,RYR2,SAMHD1,SORBS1,SPEG,SYNPO2,TMPO,TNS1,TOP2B,TTN,VCL,XIRP2	40
Metabolic Disease,Organismal Injury and Abnormalities	disorder of lipid metabolism	Disorder of lipid metabolism	0.0446	0.233			CAVIN1,FBN1,PCYT1A,TOP2B,VCL	5
Cancer,Gastrointestinal Disease,Organismal Injury and Abnormalities	pancreatobiliary tumor	Pancreatobiliary tumor	0.045	0.233			AAK1,ADD1,AP3D1,API5,CTTN,DMD,GJA1,HDAC2,HNRNPUL1,HSPA4,LIMD1,MAPK1,MYBPC3,NUCKS1,PALLD,PLEC,PPP6R1,RABL6,RYR2,SPEG,SYNM,SYNPO2L,TFIP11,TH,TMPO,TNS1,TOP2B,TTN,VCL,XIRP2	30
Cancer,Gastrointestinal Disease,Hepatic System Disease,Organismal Injury and Abnormalities	liver tumor	Liver tumor	0.0459	0.233			AAK1,ADD1,AP3D1,API5,ATP2A2,CAST,CAVIN1,CAVIN2,CTTN,DMD,DMTN,FBN1,FXR2,GJA1,GRB14,GYS1,HDAC2,HMGN1,HNRNPUL1,HSPA4,KIF21A,MAPK1,MAPK14,MYBPC3,PALLD,PLEC,PPFIBP1,PPM1K,PPP6R1,RALGAPA1,RGL2,RYR2,SAMHD1,SORBS1,SPEG,SYNPO2,TMPO,TNS1,TOP2B,TTN,VCL,XIRP2	42
Hereditary Disorder,Organismal Injury and Abnormalities,Skeletal and Muscular Disorders	hereditary skeletal myopathy	Hereditary skeletal myopathy	0.046	0.233			CAST,DMD,GYS1,PLEC,SAMHD1,TCAP,TTN	7
Tissue Morphology	quantity	Quantity of progenitor cells	0.0466	0.233		-0.246	ADD1,DMTN,GJA1,MAPK14,SYNM,TMPO	6
Cancer,Organismal Injury and Abnormalities	non-uveal melanoma	Non-uveal melanoma	0.047	0.233			AAK1,ADD1,AP3D1,API5,APOBEC2,ATP2A2,CAST,CAVIN1,CAVIN2,DMD,DMTN,FBN1,FXR2,GJA1,GRB14,GYS1,HDAC2,HNRNPUL1,HP1BP3,HSPA4,KIF21A,LIMD1,MAPK1,MAPK14,MYBPC3,MYLK3,MYOZ2,NUCKS1,OSBP2,PALLD,PCYT1A,PGRMC2,PLEC,PPP6R1,RALGAPA1,RGL2,RYR2,SAMHD1,SORBS1,SPEG,SYNM,SYNPO2,SYNPO2L,TH,TMPO,TNS1,TOP2B,TTN,VCL,XIRP2	50
Cancer,Hematological Disease,Immunological Disease,Organismal Injury and Abnormalities	peripheral T-cell lymphoma	Refractory peripheral T-cell lymphoma	0.0493	0.233			HDAC2,TOP2B	2
Cancer,Cellular Development,Cellular Growth and Proliferation,Organismal Injury and Abnormalities,Tumor Morphology	proliferation	Proliferation of carcinoma cells	0.0493	0.233			GJA1,MAPK1	2
Skeletal and Muscular Disorders	injury	Injury of muscle	0.0493	0.233			DMD,MAPK1	2
Cellular Assembly and Organization,Cellular Function and Maintenance	secretion	Secretion of vesicles	0.0493	0.233			CTTN,DMTN	2
Developmental Disorder,Hereditary Disorder,Organismal Injury and Abnormalities,Skeletal and Muscular Disorders	congenital muscular dystrophy	Congenital muscular dystrophy	0.0493	0.233			PLEC,TTN	2
Developmental Disorder,Gastrointestinal Disease,Hereditary Disorder,Neurological Disease,Organismal Injury and Abnormalities	Hirschsprung disease 1	Hirschsprung disease 1	0.0493	0.233			FBN1,PGRMC2	2
Cardiovascular Disease,Connective Tissue Disorders,Developmental Disorder,Hereditary Disorder,Organismal Injury and Abnormalities,Skeletal and Muscular Disorders	Loeys-Dietz syndrome	Loeys-Dietz syndrome	0.0493	0.233			FBN1,TMPO	2
Cellular Assembly and Organization	quantity	Quantity of lipid droplets	0.0493	0.233			AAK1,PCYT1A	2
Connective Tissue Disorders,Hematological Disease,Organismal Injury and Abnormalities	spherocytosis	Spherocytosis	0.0493	0.233			ADD1,DMTN	2
Amino Acid Metabolism,Molecular Transport,Small Molecule Biochemistry	secretion	Secretion of amino acids	0.0493	0.233			GJA1,PCYT1A	2
Cell Signaling,Small Molecule Biochemistry	quantity	Quantity of nitric oxide	0.0493	0.233			GJA1,HSPA4	2
Cancer,Hematological Disease,Immunological Disease,Organismal Injury and Abnormalities	relapsed peripheral T-cell lymphoma	Relapsed peripheral T-cell lymphoma	0.0493	0.233			HDAC2,TOP2B	2
Cardiovascular Disease,Hereditary Disorder,Organismal Injury and Abnormalities	catecholaminergic polymorphic ventricular tachycardia type 1	Catecholaminergic polymorphic ventricular tachycardia type 1	0.0493	0.233			MYBPC3,RYR2	2
Cellular Movement,Hematological System Development and Function,Immune Cell Trafficking,Inflammatory Response	chemotaxis	Chemotaxis of macrophages	0.0493	0.233			MAPK1,PLEC	2
Cancer,Organismal Injury and Abnormalities,Reproductive System Disease	advanced breast cancer	Metastatic advanced breast cancer	0.0493	0.233			HDAC2,TOP2B	2
Antigen Presentation,Inflammatory Response	antigen presentation	Antigen presentation	0.0493	0.233			AP3D1,MAPK14	2
Cell-mediated Immune Response,Cellular Development,Cellular Function and Maintenance,Cellular Growth and Proliferation,Embryonic Development,Hematological System Development and Function,Hematopoiesis,Lymphoid Tissue Structure and Development,Organ Development,Organismal Development,Tissue Development	differentiation	Differentiation of CD4+ T-lymphocytes	0.0493	0.233			MAPK1,MAPK14	2
Cardiovascular System Development and Function,Organismal Development,Reproductive System Development and Function	vascularization	Vascularization of placenta	0.0493	0.233			MAPK1,MAPK14	2
Inflammatory Disease,Inflammatory Response,Organismal Injury and Abnormalities,Respiratory Disease	chronic bronchitis	Chronic bronchitis	0.0493	0.233			HDAC2,TOP2B	2
Cancer,Hematological Disease,Immunological Disease,Organismal Injury and Abnormalities	Philadelphia-like acute lymphoblastic leukemia	Philadelphia-like acute lymphoblastic leukemia	0.0493	0.233			HDAC2,TOP2B	2
Organ Development,Reproductive System Development and Function	growth	Growth of ovarian follicle	0.0493	0.233			GJA1,MAPK14	2
Neurological Disease,Organismal Injury and Abnormalities	astrocytosis	Astrocytosis of brain	0.0493	0.233			GJA1,GYS1	2
Cellular Movement,Hematological System Development and Function,Immune Cell Trafficking,Inflammatory Response	transmigration	Transmigration of neutrophils	0.0493	0.233			CAMK2D,MYLK3	2
Cardiovascular Disease,Organismal Injury and Abnormalities	stenosis	Stenosis of aorta	0.0493	0.233			ATP2A2,TTN	2
Cell Signaling,Cellular Function and Maintenance,Small Molecule Biochemistry,Vitamin and Mineral Metabolism	calcium homeostasis	Calcium homeostasis of endoplasmic reticulum	0.0493	0.233			ATP2A2,CAMK2D	2
Cancer,Hematological Disease,Immunological Disease,Organismal Injury and Abnormalities	childhood acute lymphoblastic leukemia	Childhood acute lymphoblastic leukemia	0.0493	0.233			RYR2,TOP2B	2
Cellular Development,Cellular Growth and Proliferation,Hematological System Development and Function,Inflammatory Response,Lymphoid Tissue Structure and Development	proliferation	Proliferation of macrophages	0.0493	0.233			MAPK1,MAPK14	2
Cancer,Organismal Injury and Abnormalities,Reproductive System Disease	locally advanced breast cancer	Locally advanced breast cancer	0.0493	0.233			HDAC2,TOP2B	2
Connective Tissue Development and Function,Connective Tissue Disorders,Organ Morphology,Organismal Development,Organismal Injury and Abnormalities,Skeletal and Muscular Disorders,Skeletal and Muscular System Development and Function,Tissue Development	abnormal morphology	Abnormal morphology of rib	0.0493	0.233			FBN1,GJA1	2
Cancer,Neurological Disease,Organismal Injury and Abnormalities	supratentorial neoplasm	Supratentorial neoplasm	0.0493	0.233			HDAC2,TOP2B	2
