# Supplementary material for: Alterations in cytoskeletal and Ca2+ cycling regulators in atria lacking the obscurin Ig58/59 module
Source: Frontiers journal article supplement (doi:10.3389/fcvm.2023.1085840), 2023-04-13
Supplement: Table_5.pdf [file Table_5.pdf]

**Supplemental Table 5. Molecular pathways and cellular functions associated with significantly altered proteins in *Obscn-ΔIg58/59* atria at 6-months.**

| <b><i>Molecular Pathways</i></b>                                      |                                                                        |
|-----------------------------------------------------------------------|------------------------------------------------------------------------|
| <i>D-myo-GJA (1,4,5,6)-Tetrakisphosphate Biosynthesis (1.64)</i>      |                                                                        |
| <i>ACP6</i>                                                           | Acid phosphatase 6, lysophosphatidic                                   |
| <i>CAR3</i>                                                           | Carbonic anhydrase 3                                                   |
| <i>NUDT4</i>                                                          | Nudix (nucleoside diphosphate linked moiety X)-type motif 4            |
| <i>D-myo-inositol (3,4,5,6)-tetrakisphosphate Biosynthesis (1.64)</i> |                                                                        |
| <i>ACP6</i>                                                           | Acid phosphatase 6, lysophosphatidic                                   |
| <i>CAR3</i>                                                           | Carbonic anhydrase 3                                                   |
| <i>NUDT4</i>                                                          | Nudix (nucleoside diphosphate linked moiety X)-type motif 4            |
| <i>3-phosphoinositide Degradation (1.60)</i>                          |                                                                        |
| <i>ACP6</i>                                                           | Acid phosphatase 6, lysophosphatidic                                   |
| <i>CAR3</i>                                                           | Carbonic anhydrase 3                                                   |
| <i>NUDT4</i>                                                          | Nudix (nucleoside diphosphate linked moiety X)-type motif 4            |
| <i>D-myo-inositol-5-phosphate Metabolism (1.55)</i>                   |                                                                        |
| <i>ACP6</i>                                                           | Acid phosphatase 6, lysophosphatidic                                   |
| <i>CAR3</i>                                                           | Carbonic anhydrase 3                                                   |
| <i>NUDT4</i>                                                          | Nudix (nucleoside diphosphate linked moiety X)-type motif 4            |
| <i>3-phosphoinositide Biosynthesis (1.51)</i>                         |                                                                        |
| <i>ACP6</i>                                                           | Acid phosphatase 6, lysophosphatidic                                   |
| <i>CAR3</i>                                                           | Carbonic anhydrase 3                                                   |
| <i>NUDT4</i>                                                          | Nudix (nucleoside diphosphate linked moiety X)-type motif 4            |
| <i>Superpathway of Inositol Phosphate Compounds (1.40)</i>            |                                                                        |
| <i>ACP6</i>                                                           | Acid phosphatase 6, lysophosphatidic                                   |
| <i>CAR3</i>                                                           | Carbonic anhydrase 3                                                   |
| <i>NUDT4</i>                                                          | Nudix (nucleoside diphosphate linked moiety X)-type motif 4            |
| <b><i>Cellular Functions</i></b>                                      |                                                                        |
| <i>Permeabilization of mitochondria (2.73)</i>                        |                                                                        |
| <i>BCL2L13</i>                                                        | BCL2-like 13 (apoptosis facilitator)                                   |
| <i>HK2</i>                                                            | Hexokinase 2                                                           |
| <i>PDIA3</i>                                                          | Protein disulfide isomerase associated 3                               |
| <i>Shape change of fibroblast cell lines (1.69)</i>                   |                                                                        |
| <i>CD151</i>                                                          | CD151 antigen                                                          |
| <i>CORO1B</i>                                                         | Coronin, actin binding protein 1B                                      |
| <i>SORBS1</i>                                                         | Sorbin and SH3 domain containing 1                                     |
| <i>Termination of translation of protein (1.64)</i>                   |                                                                        |
| <i>MRPL10</i>                                                         | Mitochondrial ribosomal protein L10                                    |
| <i>MRPS28</i>                                                         | Mitochondrial ribosomal protein S28                                    |
| <i>UPF1</i>                                                           | UPF1 regulator of nonsense transcripts homolog (yeast)                 |
| <i>Phagocytosis of myeloid cells (1.60)</i>                           |                                                                        |
| <i>GLRX</i>                                                           | Glutaredoxin                                                           |
| <i>MFGE8</i>                                                          | Milk fat globule EGF and factor V/VIII domain containing (lactadherin) |
| <i>NHLRC2</i>                                                         | NHL repeat containing 2                                                |
| <i>Transport of monosaccharide (1.51)</i>                             |                                                                        |

|                                           |                                                                        |
|-------------------------------------------|------------------------------------------------------------------------|
| <i>HK2</i>                                | Hexokinase 2                                                           |
| <i>SORBS1</i>                             | Sorbin and SH3 domain containing 1                                     |
| <i>STX16</i>                              | Syntaxin 16                                                            |
| <i>Phagocytosis of phagocytes (1.51)</i>  |                                                                        |
| <i>GLRX</i>                               | Glutaredoxin                                                           |
| <i>MFGE8</i>                              | Milk fat globule EGF and factor V/VIII domain containing (lactadherin) |
| <i>NHLRC2</i>                             | NHL repeat containing 2                                                |
| <i>Cell viability of neurons (1.40)</i>   |                                                                        |
| <i>HK2</i>                                | Hexokinase 2                                                           |
| <i>PDIA3</i>                              | Protein disulfide isomerase associated 3                               |
| <i>UPF1</i>                               | UPF1 regulator of nonsense transcripts homolog (yeast)                 |
| <i>Permeability of vasculature (1.37)</i> |                                                                        |
| <i>CAMK2D</i>                             | Calcium/calmodulin-dependent protein kinase II, delta                  |
| <i>CD151</i>                              | CD151 antigen                                                          |
| <i>MFGE8</i>                              | Milk fat globule EGF and factor V/VIII domain containing (lactadherin) |

---

Significantly altered proteins and their corresponding gene symbols are listed under the molecular pathway and cellular functions they are associated with. The p-value for each molecular pathway and cellular function is represented as  $-\text{Log}_{10}(\text{p-value})$ .
